# Supplementary material for: Discovery Proteomics Identifies a Molecular Link between the Coatomer Protein Complex I and Androgen Receptor-dependent Transcription
Source: PubMed Central journal article supplement (PMC5009256; doi:10.1074/jbc.m116.732313), 2016-06-30
Supplement: 10.1074_M116.732313_jbc.M116.732313-1.pdf [file 10.1074_M116.732313_jbc.M116.732313-1.pdf]

Discovery Proteomics Identifies a Molecular Link between the Coatomer Protein Complex I and Androgen Receptor-dependent Transcription

**Jordy J. Hsiao<sup>1</sup>, Melinda M. Smits<sup>1</sup>, Brandon H. Ng<sup>1</sup>, Jinhee Lee<sup>1</sup>, Michael E. Wright<sup>1</sup>**

Supplemental:

- (S1) Supplemental Table 1: Protein identifications in the *AD* and *AS* samples.....Pages 2- 91
- (S2) Supplemental Table 2: Known AR-interacting proteins identified.....Pages 92- 110  
in the proteomic screen.
- (S3) Supplemental Table 3: Results of siRNA luciferase screen.....Pages 111-116
- (S4) Supplemental Table 4: Exported MS/MS spectra of identified peptides.....Pages 117-368

**Supplemental Table 1.** Proteins identified in the proteomic screen

| Subgroup | Entry Name                                      | Minus    | Plus     | Ratio    | Fold Change | Adjusted Values<br>(max and min) | Ln(AS/AD) | Accession Number | Gene Name |
|----------|-------------------------------------------------|----------|----------|----------|-------------|----------------------------------|-----------|------------------|-----------|
| 3184.1   | NAD-dependent protein deacetylase               | 0.00E+00 | 1.25E+03 | 1.25E+03 | 1.25E+03    | NULL                             | AS        | Q8IXJ6           | SIRT2     |
| 1989.1   | Kelch domain-containing protein                 | 0.00E+00 | 1.70E+03 | 1.70E+03 | 1.70E+03    | NULL                             | AS        | Q8IXV7           | KLHDC8B   |
| 2276.1   | Ig lambda chain V-VI region                     | 0.00E+00 | 1.79E+03 | 1.79E+03 | 1.79E+03    | NULL                             | AS        | P06317           | LV603     |
| 3101.1   | FYVE, RhoGEF and PH domain-containing protein   | 0.00E+00 | 1.80E+03 | 1.80E+03 | 1.80E+03    | NULL                             | AS        | Q6ZV73           | FGD6      |
| 2199.1   | Endonuclease V                                  | 0.00E+00 | 2.26E+03 | 2.26E+03 | 2.26E+03    | NULL                             | AS        | E5RII5           | ENDOV     |
| 824.1    | Isoform 2 of Lysine-specific demethylase        | 0.00E+00 | 2.29E+03 | 2.29E+03 | 2.29E+03    | NULL                             | AS        | Q8NHM5           | KDM2B     |
| 2160.1   | T-cell activation inhibitor, mitochondrial      | 0.00E+00 | 2.33E+03 | 2.33E+03 | 2.33E+03    | NULL                             | AS        | Q8N3R3           | TCAIM     |
| 2756.1   | Olfactory receptor 5AR1                         | 0.00E+00 | 2.39E+03 | 2.39E+03 | 2.39E+03    | NULL                             | AS        | Q8NGP9           | OR5AR1    |
| 2767.1   | Protein ALEX                                    | 0.00E+00 | 3.52E+03 | 3.52E+03 | 3.52E+03    | NULL                             | AS        | P84996           | GNAS      |
| 2300.1   | Chondroitin sulfate proteoglycan                | 0.00E+00 | 3.55E+03 | 3.55E+03 | 3.55E+03    | NULL                             | AS        | Q6UVK1           | CSPG4     |
| 1092.1   | Amidophosphoribosyltransferase                  | 0.00E+00 | 3.95E+03 | 3.95E+03 | 3.95E+03    | NULL                             | AS        | Q06203           | PPAT      |
| 1986.1   | Cancer-associated gene 1 protein                | 0.00E+00 | 4.32E+03 | 4.32E+03 | 4.32E+03    | NULL                             | AS        | Q8TC20           | CAGE1     |
| 2590.1   | Ras-interacting protein 1                       | 0.00E+00 | 4.82E+03 | 4.82E+03 | 4.82E+03    | NULL                             | AS        | Q5U651           | RASIP1    |
| 1758.1   | Ras-related protein Rab-11B                     | 0.00E+00 | 4.96E+03 | 4.96E+03 | 4.96E+03    | NULL                             | AS        | Q15907           | RAB11B    |
| 2912.1   | Parafibromin                                    | 0.00E+00 | 4.98E+03 | 4.98E+03 | 4.98E+03    | NULL                             | AS        | Q6P1J9           | CDC73     |
| 2772.1   | Protein Shroom4                                 | 0.00E+00 | 5.08E+03 | 5.08E+03 | 5.08E+03    | NULL                             | AS        | Q9ULL8           | SHROOM4   |
| 2153.1   | mRNA-decapping enzyme 1A                        | 0.00E+00 | 5.10E+03 | 5.10E+03 | 5.10E+03    | NULL                             | AS        | Q9NPI6           | DCP1A     |
| 2123.1   | Vacuolar protein sorting-associated protein     | 0.00E+00 | 5.17E+03 | 5.17E+03 | 5.17E+03    | NULL                             | AS        | O75436           | VPS26A    |
| 1913.1   | Peptidyl-alpha-hydroxyglycine aminotransferase  | 0.00E+00 | 5.23E+03 | 5.23E+03 | 5.23E+03    | NULL                             | AS        | F8W8D9           | PAM       |
| 3249.1   | Zinc finger protein with KRAB array             | 0.00E+00 | 5.38E+03 | 5.38E+03 | 5.38E+03    | NULL                             | AS        | Q63HK3           | ZKSCAN2   |
| 1289.1   | Hepatocyte cell adhesion molecule               | 0.00E+00 | 5.67E+03 | 5.67E+03 | 5.67E+03    | NULL                             | AS        | Q14CZ8           | HEPACAM   |
| 2583.1   | Rab-like protein 5                              | 0.00E+00 | 5.71E+03 | 5.71E+03 | 5.71E+03    | NULL                             | AS        | Q9H7X7           | RABL5     |
| 1317.1   | Rabenosyn-5                                     | 0.00E+00 | 6.09E+03 | 6.09E+03 | 6.09E+03    | NULL                             | AS        | Q9H1K0           | ZFYVE20   |
| 3108.1   | Myristoylated alanine-rich C-kinase             | 0.00E+00 | 6.14E+03 | 6.14E+03 | 6.14E+03    | NULL                             | AS        | P29966           | MARCKS    |
| 2853.1   | Tumor protein p63-regulated gene                | 0.00E+00 | 6.20E+03 | 6.20E+03 | 6.20E+03    | NULL                             | AS        | Q5T0D9           | TPRG1L    |
| 3054.1   | BTB/POZ domain-containing protein               | 0.00E+00 | 6.23E+03 | 6.23E+03 | 6.23E+03    | NULL                             | AS        | Q6ZWB6           | KCTD8     |
| 1757.1   | Isoform 3 of PCNA-interacting protein           | 0.00E+00 | 6.24E+03 | 6.24E+03 | 6.24E+03    | NULL                             | AS        | Q9NWS1           | PARBP     |
| 1716.1   | Isoform 2 of Cysteine-rich with forkhead domain | 0.00E+00 | 6.28E+03 | 6.28E+03 | 6.28E+03    | NULL                             | AS        | Q96HD1-2         | CRELD1    |
| 1675.1   | TRAF family member-associated protein           | 0.00E+00 | 6.31E+03 | 6.31E+03 | 6.31E+03    | NULL                             | AS        | Q92844           | TANK      |
| 2193.1   | T-cell leukemia homeobox protein                | 0.00E+00 | 6.55E+03 | 6.55E+03 | 6.55E+03    | NULL                             | AS        | P31314           | TLX1      |

|        |                                    |          |          |          |          |      |    |          |          |
|--------|------------------------------------|----------|----------|----------|----------|------|----|----------|----------|
| 3158.1 | Complement receptor type 1         | 0.00E+00 | 6.64E+03 | 6.64E+03 | 6.64E+03 | NULL | AS | E9PDY4   | CR1      |
| 2252.1 | Isoform 6 of Protein WWC2          | 0.00E+00 | 6.76E+03 | 6.76E+03 | 6.76E+03 | NULL | AS | Q6AWC2-6 | WWC2     |
| 2410.1 | WASH complex subunit strumpe       | 0.00E+00 | 6.85E+03 | 6.85E+03 | 6.85E+03 | NULL | AS | Q12768   | KIAA0196 |
| 1878.1 | Protocadherin beta-11              | 0.00E+00 | 7.24E+03 | 7.24E+03 | 7.24E+03 | NULL | AS | Q9Y5F2   | PCDHB11  |
| 2094.1 | Anoctamin-4                        | 0.00E+00 | 7.24E+03 | 7.24E+03 | 7.24E+03 | NULL | AS | Q32M45   | ANO4     |
| 2516.1 | Isoform 2 of Nucleolysin TIAR      | 0.00E+00 | 7.24E+03 | 7.24E+03 | 7.24E+03 | NULL | AS | Q01085-2 | TIAL1    |
| 3257.1 | Beta-galactosidase                 | 0.00E+00 | 7.29E+03 | 7.29E+03 | 7.29E+03 | NULL | AS | P16278   | GLB1     |
| 906.1  | Zinc finger protein 598            | 0.00E+00 | 7.46E+03 | 7.46E+03 | 7.46E+03 | NULL | AS | Q86UK7   | ZNF598   |
| 2942.1 | Protein disulfide-isomerase A5     | 0.00E+00 | 7.79E+03 | 7.79E+03 | 7.79E+03 | NULL | AS | Q14554   | PDIA5    |
| 1697.1 | C-C motif chemokine 19             | 0.00E+00 | 7.89E+03 | 7.89E+03 | 7.89E+03 | NULL | AS | Q5VZ75   | CCL19    |
| 2164.1 | Protein C15orf38-AP3S2             | 0.00E+00 | 7.89E+03 | 7.89E+03 | 7.89E+03 | NULL | AS | Q7Z6K5   | C15orf38 |
| 2975.1 | Sorting nexin-27                   | 0.00E+00 | 8.00E+03 | 8.00E+03 | 8.00E+03 | NULL | AS | Q96L92   | SNX27    |
| 2689.1 | Vacuolar protein sorting-associ    | 0.00E+00 | 8.23E+03 | 8.23E+03 | 8.23E+03 | NULL | AS | Q96QK1   | VPS35    |
| 2619.1 | Zinc finger protein 248            | 0.00E+00 | 8.77E+03 | 8.77E+03 | 8.77E+03 | NULL | AS | Q8NDW4   | ZNF248   |
| 1705.1 | Serine/arginine-rich splicing fact | 0.00E+00 | 8.79E+03 | 8.79E+03 | 8.79E+03 | NULL | AS | P84103   | SRSF3    |
| 2296.1 | Ig gamma-4 chain C region          | 0.00E+00 | 9.08E+03 | 9.08E+03 | 9.08E+03 | NULL | AS | P01861   | IGHG4    |
| 2638.1 | Survival of motor neuron-relate    | 0.00E+00 | 9.14E+03 | 9.14E+03 | 9.14E+03 | NULL | AS | O75940   | SMNDC1   |
| 3142.1 | Werner syndrome ATP-depende        | 0.00E+00 | 9.15E+03 | 9.15E+03 | 9.15E+03 | NULL | AS | Q14191   | WRN      |
| 1487.1 | Zinc finger protein 469            | 0.00E+00 | 9.29E+03 | 9.29E+03 | 9.29E+03 | NULL | AS | H3BS19   | ZNF469   |
| 2361.1 | Isoform 4 of Kinesin-like protein  | 0.00E+00 | 9.39E+03 | 9.39E+03 | 9.39E+03 | NULL | AS | O60333-4 | KIF1B    |
| 2552.1 | Phospholipase DDHD1                | 0.00E+00 | 9.46E+03 | 9.46E+03 | 9.46E+03 | NULL | AS | Q8NEL9   | DDHD1    |
| 2871.1 | Short transient receptor potenti   | 0.00E+00 | 9.56E+03 | 9.56E+03 | 9.56E+03 | NULL | AS | Q8TEL6   | TRPC4AP  |
| 2980.1 | U4/U6 small nuclear ribonucleo     | 0.00E+00 | 9.56E+03 | 9.56E+03 | 9.56E+03 | NULL | AS | Q8WWY3   | PRPF31   |
| 1889.1 | Leucine-rich repeats and immur     | 0.00E+00 | 9.64E+03 | 9.64E+03 | 9.64E+03 | NULL | AS | Q6UXM1   | LRIG3    |
| 4.2    | Acetyl-CoA carboxylase 2           | 0.00E+00 | 9.82E+03 | 9.82E+03 | 9.82E+03 | NULL | AS | O00763   | ACACB    |
| 1278.1 | Cleavage and polyadenylation s     | 0.00E+00 | 9.90E+03 | 9.90E+03 | 9.90E+03 | NULL | AS | Q9UKF6   | CPSF3    |
| 1061.1 | Isoform 2 of Isochorismatase do    | 0.00E+00 | 1.01E+04 | 1.01E+04 | 1.01E+04 | NULL | AS | Q96AB3-2 | ISOC2    |
| 2658.1 | Isoform 2 of Protein KIBRA         | 0.00E+00 | 1.01E+04 | 1.01E+04 | 1.01E+04 | NULL | AS | Q8IX03-2 | WWC1     |
| 1679.1 | Putative 60S ribosomal protein I   | 0.00E+00 | 1.02E+04 | 1.02E+04 | 1.02E+04 | NULL | AS | A6NKH3   | RPL37L   |
| 1306.1 | E3 ubiquitin-protein ligase LRSA   | 0.00E+00 | 1.03E+04 | 1.03E+04 | 1.03E+04 | NULL | AS | Q6UWE0   | LRSAM1   |
| 2478.1 | Methyl-CpG-binding domain prc      | 0.00E+00 | 1.03E+04 | 1.03E+04 | 1.03E+04 | NULL | AS | Q96DN6   | MBD6     |
| 781.2  | Isoform 3 of Zinc finger and SCA   | 0.00E+00 | 1.06E+04 | 1.06E+04 | 1.06E+04 | NULL | AS | Q8TBC5-3 | ZSCAN18  |
| 3049.1 | Histone-lysine N-methyltransfer    | 0.00E+00 | 1.06E+04 | 1.06E+04 | 1.06E+04 | NULL | AS | O96028   | WHSC1    |
| 2541.1 | Olfactory receptor 52H1            | 0.00E+00 | 1.07E+04 | 1.07E+04 | 1.07E+04 | NULL | AS | Q8NGJ2   | OR52H1   |
| 1933.1 | Ankyrin repeat domain-containi     | 0.00E+00 | 1.14E+04 | 1.14E+04 | 1.14E+04 | NULL | AS | E9PIL2   | ANKRD42  |

|        |                                   |          |          |          |          |      |    |          |          |
|--------|-----------------------------------|----------|----------|----------|----------|------|----|----------|----------|
| 2202.1 | Zinc finger protein 555           | 0.00E+00 | 1.15E+04 | 1.15E+04 | 1.15E+04 | NULL | AS | Q8NEP9   | ZNF555   |
| 1246.1 | Abnormal spindle-like microcep    | 0.00E+00 | 1.16E+04 | 1.16E+04 | 1.16E+04 | NULL | AS | Q8IZT6   | ASPM     |
| 3181.1 | Ankyrin repeat domain-containi    | 0.00E+00 | 1.16E+04 | 1.16E+04 | 1.16E+04 | NULL | AS | Q8N283   | ANKRD35  |
| 3085.1 | Beta-galactoside alpha-2,6-sialy  | 0.00E+00 | 1.17E+04 | 1.17E+04 | 1.17E+04 | NULL | AS | P15907   | ST6GAL1  |
| 3018.1 | Isoform 5 of Oxysterol-binding p  | 0.00E+00 | 1.18E+04 | 1.18E+04 | 1.18E+04 | NULL | AS | Q9BZF3-5 | OSBPL6   |
| 1925.1 | TNF receptor-associated factor :  | 0.00E+00 | 1.22E+04 | 1.22E+04 | 1.22E+04 | NULL | AS | Q13077   | TRAF1    |
| 1005.1 | FAST kinase domain-containing     | 0.00E+00 | 1.23E+04 | 1.23E+04 | 1.23E+04 | NULL | AS | Q53R41   | FASTKD1  |
| 2934.1 | Mitochondrial ribonuclease P pr   | 0.00E+00 | 1.23E+04 | 1.23E+04 | 1.23E+04 | NULL | AS | Q7L0Y3   | TRMT10C  |
| 1958.1 | Diamine acetyltransferase 2       | 0.00E+00 | 1.24E+04 | 1.24E+04 | 1.24E+04 | NULL | AS | Q96F10   | SAT2     |
| 3200.1 | BTB/POZ domain-containing prc     | 0.00E+00 | 1.24E+04 | 1.24E+04 | 1.24E+04 | NULL | AS | B4DIP9   | KCTD20   |
| 1037.1 | Fructosamine-3-kinase             | 0.00E+00 | 1.25E+04 | 1.25E+04 | 1.25E+04 | NULL | AS | Q9H479   | FN3K     |
| 3090.1 | Isoform 4 of Probable helicase s  | 0.00E+00 | 1.25E+04 | 1.25E+04 | 1.25E+04 | NULL | AS | Q7Z333-4 | SETX     |
| 1335.1 | Isoform 2 of MOB kinase activat   | 0.00E+00 | 1.26E+04 | 1.26E+04 | 1.26E+04 | NULL | AS | Q7L9L4-2 | MOB1B    |
| 2661.1 | Rho guanine nucleotide exchang    | 0.00E+00 | 1.29E+04 | 1.29E+04 | 1.29E+04 | NULL | AS | Q9NZN5   | ARHGEF12 |
| 1874.1 | Olfactory receptor 51A7           | 0.00E+00 | 1.31E+04 | 1.31E+04 | 1.31E+04 | NULL | AS | Q8NH64   | OR51A7   |
| 1429.1 | Sec1 family domain-containing p   | 0.00E+00 | 1.33E+04 | 1.33E+04 | 1.33E+04 | NULL | AS | Q8WVM8   | SCFD1    |
| 2803.1 | Chromosome 9 open reading fra     | 0.00E+00 | 1.33E+04 | 1.33E+04 | 1.33E+04 | NULL | AS | Q5SQD6   | C9orf47  |
| 1601.1 | GTP:AMP phosphotransferase, r     | 0.00E+00 | 1.36E+04 | 1.36E+04 | 1.36E+04 | NULL | AS | Q9UIJ7   | AK3      |
| 2782.1 | Son of sevenless homolog 1        | 0.00E+00 | 1.37E+04 | 1.37E+04 | 1.37E+04 | NULL | AS | Q07889   | SOS1     |
| 1303.1 | Hyaluronan synthase 3             | 0.00E+00 | 1.39E+04 | 1.39E+04 | 1.39E+04 | NULL | AS | O00219   | HAS3     |
| 3043.1 | Serine/arginine repetitive matri: | 0.00E+00 | 1.44E+04 | 1.44E+04 | 1.44E+04 | NULL | AS | E9PCT1   | SRRM1    |
| 927.1  | Diacylglycerol kinase eta         | 0.00E+00 | 1.45E+04 | 1.45E+04 | 1.45E+04 | NULL | AS | Q86XP1   | DGKH     |
| 2070.1 | Glycine amidinotransferase, mit   | 0.00E+00 | 1.45E+04 | 1.45E+04 | 1.45E+04 | NULL | AS | P50440   | GATM     |
| 3102.1 | Retinal dehydrogenase 2           | 0.00E+00 | 1.47E+04 | 1.47E+04 | 1.47E+04 | NULL | AS | O94788   | ALDH1A2  |
| 2246.1 | Proteasome assembly chaperon      | 0.00E+00 | 1.52E+04 | 1.52E+04 | 1.52E+04 | NULL | AS | Q969U7   | PSMG2    |
| 1011.1 | UBX domain-containing protein     | 0.00E+00 | 1.54E+04 | 1.54E+04 | 1.54E+04 | NULL | AS | O94888   | UBXN7    |
| 2129.1 | E3 ubiquitin-protein ligase UHRF  | 0.00E+00 | 1.54E+04 | 1.54E+04 | 1.54E+04 | NULL | AS | Q96PU4   | UHRF2    |
| 2075.1 | Isoform 7 of Protein MTO1 hom     | 0.00E+00 | 1.55E+04 | 1.55E+04 | 1.55E+04 | NULL | AS | Q9Y2Z2-6 | MTO1     |
| 2671.1 | Homeobox protein BarH-like 1      | 0.00E+00 | 1.55E+04 | 1.55E+04 | 1.55E+04 | NULL | AS | Q9HBU1   | BARX1    |
| 1718.1 | Isocitrate dehydrogenase [NAD]    | 0.00E+00 | 1.57E+04 | 1.57E+04 | 1.57E+04 | NULL | AS | O43837   | IDH3B    |
| 1031.1 | Adenosine receptor A2b            | 0.00E+00 | 1.58E+04 | 1.58E+04 | 1.58E+04 | NULL | AS | P29275   | ADORA2B  |
| 1950.1 | CUB and sushi domain-containir    | 0.00E+00 | 1.58E+04 | 1.58E+04 | 1.58E+04 | NULL | AS | Q7Z407   | CSMD3    |
| 2053.1 | THO complex subunit 6 homolo      | 0.00E+00 | 1.58E+04 | 1.58E+04 | 1.58E+04 | NULL | AS | Q86W42   | THOC6    |
| 1497.1 | Porphobilinogen deaminase         | 0.00E+00 | 1.62E+04 | 1.62E+04 | 1.62E+04 | NULL | AS | P08397   | HMBS     |
| 1802.1 | Ankyrin repeat and LEM domain     | 0.00E+00 | 1.62E+04 | 1.62E+04 | 1.62E+04 | NULL | AS | Q86XL3   | ANKLE2   |

|        |                                    |          |          |          |          |      |    |          |           |
|--------|------------------------------------|----------|----------|----------|----------|------|----|----------|-----------|
| 2939.1 | Homeobox protein SIX6              | 0.00E+00 | 1.62E+04 | 1.62E+04 | 1.62E+04 | NULL | AS | O95475   | SIX6      |
| 2353.1 | IQ domain-containing protein E     | 0.00E+00 | 1.65E+04 | 1.65E+04 | 1.65E+04 | NULL | AS | Q6IPM2   | IQCE      |
| 1754.1 | Rho guanine nucleotide exchan      | 0.00E+00 | 1.66E+04 | 1.66E+04 | 1.66E+04 | NULL | AS | Q5VV41   | ARHGEF16  |
| 3027.1 | Guanine nucleotide-binding pro     | 0.00E+00 | 1.67E+04 | 1.67E+04 | 1.67E+04 | NULL | AS | Q14344   | GNA13     |
| 3215.1 | E3 ubiquitin-protein ligase RNF1   | 0.00E+00 | 1.67E+04 | 1.67E+04 | 1.67E+04 | NULL | AS | B7Z3J5   | RNF14     |
| 2588.1 | Ras-specific guanine nucleotide-   | 0.00E+00 | 1.68E+04 | 1.68E+04 | 1.68E+04 | NULL | AS | Q13972   | RASGRF1   |
| 2392.1 | Spermatogenesis-associated pro     | 0.00E+00 | 1.69E+04 | 1.69E+04 | 1.69E+04 | NULL | AS | P0DKV0   | SPATA31C1 |
| 1713.1 | Ankyrin repeat and SAM domain      | 0.00E+00 | 1.75E+04 | 1.75E+04 | 1.75E+04 | NULL | AS | Q92625   | ANKS1A    |
| 2559.1 | Lysine-specific histone demethy    | 0.00E+00 | 1.75E+04 | 1.75E+04 | 1.75E+04 | NULL | AS | F6S0T5   | KDM1A     |
| 2154.1 | GRIP and coiled-coil domain-cor    | 0.00E+00 | 1.79E+04 | 1.79E+04 | 1.79E+04 | NULL | AS | Q8IWJ2   | GCC2      |
| 2543.1 | 60S ribosomal protein L39-like     | 0.00E+00 | 1.87E+04 | 1.87E+04 | 1.87E+04 | NULL | AS | Q96EH5   | RPL39L    |
| 2501.1 | Centrosomal protein of 89 kDa      | 0.00E+00 | 1.91E+04 | 1.91E+04 | 1.91E+04 | NULL | AS | K7EJF0   | CEP89     |
| 1665.1 | Plexin-A4                          | 0.00E+00 | 1.92E+04 | 1.92E+04 | 1.92E+04 | NULL | AS | Q9HCM2   | PLXNA4    |
| 1805.1 | Nitric oxide synthase-interacti    | 0.00E+00 | 1.93E+04 | 1.93E+04 | 1.93E+04 | NULL | AS | Q9Y314   | NOSIP     |
| 1655.1 | Isoform 3 of Neurabin-1            | 0.00E+00 | 1.94E+04 | 1.94E+04 | 1.94E+04 | NULL | AS | Q9ULJ8-3 | PPP1R9A   |
| 2960.1 | Protein canopy homolog 3           | 0.00E+00 | 1.94E+04 | 1.94E+04 | 1.94E+04 | NULL | AS | Q9BT09   | CNPY3     |
| 1991.1 | Synaptojanin-1                     | 0.00E+00 | 2.05E+04 | 2.05E+04 | 2.05E+04 | NULL | AS | J3KQV8   | SYNJ1     |
| 1131.1 | GTP-binding protein 1              | 0.00E+00 | 2.08E+04 | 2.08E+04 | 2.08E+04 | NULL | AS | O00178   | GTPBP1    |
| 1774.1 | Arf-GAP with GTPase, ANK repe      | 0.00E+00 | 2.09E+04 | 2.09E+04 | 2.09E+04 | NULL | AS | E7ESL9   | AGAP3     |
| 1937.1 | SH2 domain-containing adapter      | 0.00E+00 | 2.09E+04 | 2.09E+04 | 2.09E+04 | NULL | AS | Q15464   | SHB       |
| 2973.1 | Beta-2-syntrophin                  | 0.00E+00 | 2.09E+04 | 2.09E+04 | 2.09E+04 | NULL | AS | Q13425   | SNTB2     |
| 2120.1 | Transmembrane protein FLJ373       | 0.00E+00 | 2.11E+04 | 2.11E+04 | 2.11E+04 | NULL | AS | Q8N1W0   | YF005     |
| 2857.1 | Rab11 family-interacting proteir   | 0.00E+00 | 2.11E+04 | 2.11E+04 | 2.11E+04 | NULL | AS | Q6WKZ4   | RAB11FIP1 |
| 1948.1 | Oligophrenin-1                     | 0.00E+00 | 2.12E+04 | 2.12E+04 | 2.12E+04 | NULL | AS | O60890   | OPHN1     |
| 2904.1 | Protein-L-isoaspartate O-methyl    | 0.00E+00 | 2.12E+04 | 2.12E+04 | 2.12E+04 | NULL | AS | Q96MG8   | PCMTD1    |
| 744.1  | Zinc finger protein 287            | 0.00E+00 | 2.14E+04 | 2.14E+04 | 2.14E+04 | NULL | AS | Q9HBT7   | ZNF287    |
| 1615.1 | Actin-related protein 2/3 compl    | 0.00E+00 | 2.16E+04 | 2.16E+04 | 2.16E+04 | NULL | AS | Q9BPX5   | ARPC5L    |
| 2747.1 | Glutamine--fructose-6-phospha      | 0.00E+00 | 2.16E+04 | 2.16E+04 | 2.16E+04 | NULL | AS | O94808   | GFPT2     |
| 1659.1 | Aldo-keto reductase family 1 me    | 0.00E+00 | 2.17E+04 | 2.17E+04 | 2.17E+04 | NULL | AS | A6NHU4   | AKR1C1    |
| 2429.1 | Isoform SOLAT of Threonine syn     | 0.00E+00 | 2.19E+04 | 2.19E+04 | 2.19E+04 | NULL | AS | Q86YJ6-5 | THNSL2    |
| 308.2  | Serine/arginine-rich splicing fact | 0.00E+00 | 2.22E+04 | 2.22E+04 | 2.22E+04 | NULL | AS | Q08170   | SRSF4     |
| 1759.1 | Isoform 1 of Ena/VASP-like prot    | 0.00E+00 | 2.22E+04 | 2.22E+04 | 2.22E+04 | NULL | AS | Q9UI08-2 | EVL       |
| 1980.1 | Wolframin                          | 0.00E+00 | 2.24E+04 | 2.24E+04 | 2.24E+04 | NULL | AS | O76024   | WFS1      |
| 2832.1 | Thyrotropin-releasing hormone-     | 0.00E+00 | 2.26E+04 | 2.26E+04 | 2.26E+04 | NULL | AS | Q9UKU6   | TRHDE     |
| 3075.1 | NACHT, LRR and PYD domains-c       | 0.00E+00 | 2.28E+04 | 2.28E+04 | 2.28E+04 | NULL | AS | Q86W24   | NLRP14    |

|        |                                   |          |          |          |          |      |    |          |          |
|--------|-----------------------------------|----------|----------|----------|----------|------|----|----------|----------|
| 2668.1 | Helicase SRCAP                    | 0.00E+00 | 2.33E+04 | 2.33E+04 | 2.33E+04 | NULL | AS | Q6ZRS2   | SRCAP    |
| 1466.1 | Nuclear fragile X mental retarda  | 0.00E+00 | 2.35E+04 | 2.35E+04 | 2.35E+04 | NULL | AS | Q7Z417   | NUFIP2   |
| 2872.1 | Protein CMSS1                     | 0.00E+00 | 2.35E+04 | 2.35E+04 | 2.35E+04 | NULL | AS | Q9BQ75   | CMSS1    |
| 1808.1 | Coiled-coil domain-containing p   | 0.00E+00 | 2.36E+04 | 2.36E+04 | 2.36E+04 | NULL | AS | Q567U6   | CCDC93   |
| 1671.1 | E3 ubiquitin-protein ligase NEDI  | 0.00E+00 | 2.38E+04 | 2.38E+04 | 2.38E+04 | NULL | AS | P46934   | NEDD4    |
| 2322.1 | Neurexin-2-alpha                  | 0.00E+00 | 2.38E+04 | 2.38E+04 | 2.38E+04 | NULL | AS | Q9P2S2   | NRXN2    |
| 966.1  | MKL/myocardin-like 2, isoform (   | 0.00E+00 | 2.44E+04 | 2.44E+04 | 2.44E+04 | NULL | AS | B4DGT8   | MKL2     |
| 2824.1 | Clathrin heavy chain linker domi  | 0.00E+00 | 2.44E+04 | 2.44E+04 | 2.44E+04 | NULL | AS | Q8NHS4   | CLHC1    |
| 2024.1 | RUN and FYVE domain-containir     | 0.00E+00 | 2.47E+04 | 2.47E+04 | 2.47E+04 | NULL | AS | Q8WXA3   | RUFY2    |
| 886.1  | DnaJ homolog subfamily C mem      | 0.00E+00 | 2.50E+04 | 2.50E+04 | 2.50E+04 | NULL | AS | Q96KC8   | DNAJC1   |
| 2885.1 | Pancreas/duodenum homeobox        | 0.00E+00 | 2.50E+04 | 2.50E+04 | 2.50E+04 | NULL | AS | P52945   | PDX1     |
| 2290.1 | Mitochondrial import inner mer    | 0.00E+00 | 2.57E+04 | 2.57E+04 | 2.57E+04 | NULL | AS | O43615   | TIMM44   |
| 3211.1 | Isoform 2 of Suppressor of IKBKl  | 0.00E+00 | 2.67E+04 | 2.67E+04 | 2.67E+04 | NULL | AS | Q9BRV8-2 | SIKE1    |
| 3214.1 | DNA-directed RNA polymerase I     | 0.00E+00 | 2.69E+04 | 2.69E+04 | 2.69E+04 | NULL | AS | Q9NVU0   | POLR3E   |
| 2060.1 | ATP-sensitive inward rectifier pc | 0.00E+00 | 2.72E+04 | 2.72E+04 | 2.72E+04 | NULL | AS | Q15842   | KCNJ8    |
| 2355.1 | Isoform 2 of Voltage-dependent    | 0.00E+00 | 2.73E+04 | 2.73E+04 | 2.73E+04 | NULL | AS | Q13936-2 | CACNA1C  |
| 2550.1 | Ras-related protein Rab-5B        | 0.00E+00 | 2.73E+04 | 2.73E+04 | 2.73E+04 | NULL | AS | P61020   | RAB5B    |
| 1658.1 | Structural maintenance of chror   | 0.00E+00 | 2.74E+04 | 2.74E+04 | 2.74E+04 | NULL | AS | Q9UQE7   | SMC3     |
| 1638.1 | Bone morphogenetic protein 4      | 0.00E+00 | 2.78E+04 | 2.78E+04 | 2.78E+04 | NULL | AS | P12644   | BMP4     |
| 2371.1 | Platelet-derived growth factor r  | 0.00E+00 | 2.78E+04 | 2.78E+04 | 2.78E+04 | NULL | AS | P09619   | PDGFRB   |
| 866.1  | Asparagine synthetase [glutami    | 0.00E+00 | 2.79E+04 | 2.79E+04 | 2.79E+04 | NULL | AS | P08243   | ASNS     |
| 1430.1 | Coiled-coil domain-containing p   | 0.00E+00 | 2.80E+04 | 2.80E+04 | 2.80E+04 | NULL | AS | Q0VZ6    | CCDC173  |
| 1213.1 | Isoform 3 of Ataxin-2-like protei | 0.00E+00 | 2.82E+04 | 2.82E+04 | 2.82E+04 | NULL | AS | Q8WWM7   | ATXN2L   |
| 2130.1 | Nuclear pore complex-interactir   | 0.00E+00 | 2.83E+04 | 2.83E+04 | 2.83E+04 | NULL | AS | C9JG80   | NPIPL3   |
| 1920.1 | Poliovirus receptor-related prot  | 0.00E+00 | 2.89E+04 | 2.89E+04 | 2.89E+04 | NULL | AS | Q15223   | PVRL1    |
| 1928.1 | Deleted in bladder cancer prote   | 0.00E+00 | 2.93E+04 | 2.93E+04 | 2.93E+04 | NULL | AS | O60477   | DBC1     |
| 2581.1 | Integrator complex subunit 5      | 0.00E+00 | 2.93E+04 | 2.93E+04 | 2.93E+04 | NULL | AS | Q6P9B9   | INTS5    |
| 1326.1 | Lys-63-specific deubiquitinase B  | 0.00E+00 | 2.94E+04 | 2.94E+04 | 2.94E+04 | NULL | AS | P46736   | BRCC3    |
| 2377.1 | Cysteine/serine-rich nuclear pro  | 0.00E+00 | 2.94E+04 | 2.94E+04 | 2.94E+04 | NULL | AS | Q9H175   | CSRNP2   |
| 2707.1 | Ankyrin repeat domain-containi    | 0.00E+00 | 2.96E+04 | 2.96E+04 | 2.96E+04 | NULL | AS | H7C425   | ANKRD36C |
| 1499.1 | Rho guanine nucleotide exchang    | 0.00E+00 | 2.98E+04 | 2.98E+04 | 2.98E+04 | NULL | AS | Q96PE2   | ARHGEF17 |
| 2151.1 | THO complex subunit 7 homolo      | 0.00E+00 | 2.99E+04 | 2.99E+04 | 2.99E+04 | NULL | AS | Q6I9Y2   | THOC7    |
| 2395.1 | Apoptotic chromatin condensat     | 0.00E+00 | 3.00E+04 | 3.00E+04 | 3.00E+04 | NULL | AS | Q9UKV3   | ACIN1    |
| 3236.1 | SLAIN motif-containing protein :  | 0.00E+00 | 3.03E+04 | 3.03E+04 | 3.03E+04 | NULL | AS | Q9P270   | SLAIN2   |
| 2561.1 | RNA-binding protein 26            | 0.00E+00 | 3.04E+04 | 3.04E+04 | 3.04E+04 | NULL | AS | Q5T8P6   | RBM26    |

|        |                                    |          |          |          |          |      |    |          |          |
|--------|------------------------------------|----------|----------|----------|----------|------|----|----------|----------|
| 1291.1 | FCH and double SH3 domains pr      | 0.00E+00 | 3.05E+04 | 3.05E+04 | 3.05E+04 | NULL | AS | E9PG19   | FCHSD2   |
| 2082.1 | Protein FAM216A                    | 0.00E+00 | 3.07E+04 | 3.07E+04 | 3.07E+04 | NULL | AS | Q8WUB2   | FAM216A  |
| 2627.1 | Isoform 2 of WNT1-inducible-sig    | 0.00E+00 | 3.10E+04 | 3.10E+04 | 3.10E+04 | NULL | AS | O95389-2 | WISP3    |
| 1170.1 | Dynein heavy chain 11, axonem.     | 0.00E+00 | 3.12E+04 | 3.12E+04 | 3.12E+04 | NULL | AS | Q96DT5   | DNAH11   |
| 1826.1 | G protein-activated inward recti   | 0.00E+00 | 3.12E+04 | 3.12E+04 | 3.12E+04 | NULL | AS | P48051   | KCNJ6    |
| 2709.1 | Protein bassoon                    | 0.00E+00 | 3.12E+04 | 3.12E+04 | 3.12E+04 | NULL | AS | Q9UPA5   | BSN      |
| 1764.1 | Spectrin beta chain, non-erythrc   | 0.00E+00 | 3.17E+04 | 3.17E+04 | 3.17E+04 | NULL | AS | Q01082   | SPTBN1   |
| 2066.1 | Histone-lysine N-methyltransfer    | 0.00E+00 | 3.17E+04 | 3.17E+04 | 3.17E+04 | NULL | AS | Q86TU7   | SETD3    |
| 2336.1 | RNA-binding motif protein, X ch    | 0.00E+00 | 3.17E+04 | 3.17E+04 | 3.17E+04 | NULL | AS | P38159   | RBMX     |
| 3183.1 | Interferon-induced protein with    | 0.00E+00 | 3.20E+04 | 3.20E+04 | 3.20E+04 | NULL | AS | Q13325   | IFIT5    |
| 1760.1 | 3-ketoacyl-CoA thiolase, peroxis   | 0.00E+00 | 3.21E+04 | 3.21E+04 | 3.21E+04 | NULL | AS | P09110   | ACAA1    |
| 3093.1 | Dual adapter for phosphotyrosin    | 0.00E+00 | 3.28E+04 | 3.28E+04 | 3.28E+04 | NULL | AS | Q9UN19   | DAPP1    |
| 1373.1 | Leucine-rich repeat-containing p   | 0.00E+00 | 3.34E+04 | 3.34E+04 | 3.34E+04 | NULL | AS | B4DJ72   | LRRC27   |
| 3240.1 | Acetoacetyl-CoA synthetase         | 0.00E+00 | 3.36E+04 | 3.36E+04 | 3.36E+04 | NULL | AS | F5GYW2   | AACS     |
| 1814.1 | ADNP homeobox protein 2            | 0.00E+00 | 3.42E+04 | 3.42E+04 | 3.42E+04 | NULL | AS | Q6IQ32   | ADNP2    |
| 2497.1 | Endonuclease 8-like 2              | 0.00E+00 | 3.43E+04 | 3.43E+04 | 3.43E+04 | NULL | AS | Q969S2   | NEIL2    |
| 2970.1 | Prickle-like protein 2             | 0.00E+00 | 3.46E+04 | 3.46E+04 | 3.46E+04 | NULL | AS | H3BNU0   | PRICKLE2 |
| 1668.1 | Protein DENND6B                    | 0.00E+00 | 3.48E+04 | 3.48E+04 | 3.48E+04 | NULL | AS | Q8NEG7   | DENND6B  |
| 1331.1 | Chloride channel CLIC-like prote   | 0.00E+00 | 3.50E+04 | 3.50E+04 | 3.50E+04 | NULL | AS | Q96S66   | CLCC1    |
| 3227.1 | Noggin                             | 0.00E+00 | 3.57E+04 | 3.57E+04 | 3.57E+04 | NULL | AS | Q13253   | NOG      |
| 1286.1 | Translation initiation factor eIF- | 0.00E+00 | 3.62E+04 | 3.62E+04 | 3.62E+04 | NULL | AS | P49770   | EIF2B2   |
| 2085.1 | Protein FAM149B1                   | 0.00E+00 | 3.64E+04 | 3.64E+04 | 3.64E+04 | NULL | AS | Q96BN6   | FAM149B1 |
| 2622.1 | Inhibitor of Bruton tyrosine kina  | 0.00E+00 | 3.64E+04 | 3.64E+04 | 3.64E+04 | NULL | AS | Q9P2D0   | IBTK     |
| 2277.1 | Heat shock 70 kDa protein 4        | 0.00E+00 | 3.65E+04 | 3.65E+04 | 3.65E+04 | NULL | AS | P34932   | HSPA4    |
| 2312.1 | Coiled-coil domain-containing p    | 0.00E+00 | 3.66E+04 | 3.66E+04 | 3.66E+04 | NULL | AS | Q9NQR7   | CCDC177  |
| 2352.1 | Zinc finger protein 678            | 0.00E+00 | 3.71E+04 | 3.71E+04 | 3.71E+04 | NULL | AS | F5GXA7   | ZNF678   |
| 2203.1 | Spermatogenesis-associated pro     | 0.00E+00 | 3.74E+04 | 3.74E+04 | 3.74E+04 | NULL | AS | Q5VX52   | SPATA1   |
| 2466.1 | Peroxisome proliferator-activat    | 0.00E+00 | 3.76E+04 | 3.76E+04 | 3.76E+04 | NULL | AS | Q86YN6   | PPARGC1B |
| 372.2  | Nucleosome assembly protein 1      | 0.00E+00 | 3.78E+04 | 3.78E+04 | 3.78E+04 | NULL | AS | F5HFY4   | NAP1L4b  |
| 2472.1 | Protein AKNAD1                     | 0.00E+00 | 3.78E+04 | 3.78E+04 | 3.78E+04 | NULL | AS | F2Z2Q7   | AKNAD1   |
| 1873.1 | Isoform 4 of Coiled-coil domain-   | 0.00E+00 | 3.79E+04 | 3.79E+04 | 3.79E+04 | NULL | AS | Q6ZUS6-4 | CCDC149  |
| 1782.1 | Zinc finger protein 33A            | 0.00E+00 | 3.82E+04 | 3.82E+04 | 3.82E+04 | NULL | AS | F6TH33   | ZNF33A   |
| 2427.1 | CD2 antigen cytoplasmic tail-bin   | 0.00E+00 | 3.85E+04 | 3.85E+04 | 3.85E+04 | NULL | AS | O95400   | CD2BP2   |
| 3116.1 | Dimethylaniline monooxygenase      | 0.00E+00 | 3.85E+04 | 3.85E+04 | 3.85E+04 | NULL | AS | P49326   | FMO5     |
| 2673.1 | Zinc finger protein GLI1           | 0.00E+00 | 3.87E+04 | 3.87E+04 | 3.87E+04 | NULL | AS | P08151   | GLI1     |

|        |                                   |          |          |          |          |      |    |          |          |
|--------|-----------------------------------|----------|----------|----------|----------|------|----|----------|----------|
| 2930.1 | Serine/threonine-protein kinase   | 0.00E+00 | 3.93E+04 | 3.93E+04 | 3.93E+04 | NULL | AS | Q8IYT8   | ULK2     |
| 2161.1 | Polymerase delta-interacting pr   | 0.00E+00 | 4.00E+04 | 4.00E+04 | 4.00E+04 | NULL | AS | Q9Y2S7   | POLDIP2  |
| 2485.1 | Isoform 3 of Epithelial-stromal i | 0.00E+00 | 4.00E+04 | 4.00E+04 | 4.00E+04 | NULL | AS | Q96J88-3 | EPST11   |
| 2899.1 | Zinc finger protein 564           | 0.00E+00 | 4.01E+04 | 4.01E+04 | 4.01E+04 | NULL | AS | Q8TBZ8   | ZNF564   |
| 3008.1 | Podocan-like protein 1            | 0.00E+00 | 4.06E+04 | 4.06E+04 | 4.06E+04 | NULL | AS | Q6PEZ8   | PODNL1   |
| 2189.1 | Membrane-associated phosphat      | 0.00E+00 | 4.08E+04 | 4.08E+04 | 4.08E+04 | NULL | AS | Q9BZ72   | PITPNM2  |
| 1369.1 | General transcription factor II-I | 0.00E+00 | 4.13E+04 | 4.13E+04 | 4.13E+04 | NULL | AS | P78347   | GTF2I    |
| 810.1  | Isoform 6 of Dynamin-1-like pro   | 0.00E+00 | 4.15E+04 | 4.15E+04 | 4.15E+04 | NULL | AS | O00429-6 | DNM1L    |
| 2217.1 | Protein MCM10 homolog             | 0.00E+00 | 4.18E+04 | 4.18E+04 | 4.18E+04 | NULL | AS | Q7L590   | MCM10    |
| 1673.1 | Isoform 3 of Zinc finger protein  | 0.00E+00 | 4.20E+04 | 4.20E+04 | 4.20E+04 | NULL | AS | Q5VV52-3 | ZNF691   |
| 638.1  | YTH domain family protein 2       | 0.00E+00 | 4.27E+04 | 4.27E+04 | 4.27E+04 | NULL | AS | Q9Y5A9   | YTHDF2   |
| 1069.1 | Pinin                             | 0.00E+00 | 4.27E+04 | 4.27E+04 | 4.27E+04 | NULL | AS | Q9H307   | PNN      |
| 3167.1 | Coiled-coil domain-containing p   | 0.00E+00 | 4.28E+04 | 4.28E+04 | 4.28E+04 | NULL | AS | Q8IYE0   | CCDC146  |
| 1837.1 | Transcription factor Sp2          | 0.00E+00 | 4.31E+04 | 4.31E+04 | 4.31E+04 | NULL | AS | Q02086   | SP2      |
| 1898.1 | WD repeat-containing protein 6    | 0.00E+00 | 4.32E+04 | 4.32E+04 | 4.32E+04 | NULL | AS | Q8WVS4   | WDR60    |
| 2103.1 | Isoform 2 of TGF-beta receptor    | 0.00E+00 | 4.32E+04 | 4.32E+04 | 4.32E+04 | NULL | AS | P37173-2 | TGFB2    |
| 3132.1 | Fibronectin type-III domain-cont  | 0.00E+00 | 4.33E+04 | 4.33E+04 | 4.33E+04 | NULL | AS | F2Z333   | C1orf233 |
| 1116.1 | Testis-specific Y-encoded-like pr | 0.00E+00 | 4.34E+04 | 4.34E+04 | 4.34E+04 | NULL | AS | Q9H0U9   | TSPYL1   |
| 1749.1 | Beta-catenin-interacting protein  | 0.00E+00 | 4.41E+04 | 4.41E+04 | 4.41E+04 | NULL | AS | Q9NSA3   | CTNNBIP1 |
| 2345.1 | Cyclin-dependent kinase 7         | 0.00E+00 | 4.41E+04 | 4.41E+04 | 4.41E+04 | NULL | AS | P50613   | CDK7     |
| 2526.1 | Thimet oligopeptidase             | 0.00E+00 | 4.41E+04 | 4.41E+04 | 4.41E+04 | NULL | AS | P52888   | THOP1    |
| 2959.1 | A disintegrin and metalloprotein  | 0.00E+00 | 4.41E+04 | 4.41E+04 | 4.41E+04 | NULL | AS | Q8TE58   | ADAMTS15 |
| 2845.1 | Zinc finger protein ZFPM2         | 0.00E+00 | 4.51E+04 | 4.51E+04 | 4.51E+04 | NULL | AS | Q8WW38   | ZFPM2    |
| 1174.1 | Ornithine decarboxylase antizyn   | 0.00E+00 | 4.55E+04 | 4.55E+04 | 4.55E+04 | NULL | AS | P54368   | OAZ1     |
| 2651.1 | Protein phosphatase 1 regulato    | 0.00E+00 | 4.55E+04 | 4.55E+04 | 4.55E+04 | NULL | AS | Q7Z4L9   | PPP1R42  |
| 2482.1 | Transcriptional activator proteir | 0.00E+00 | 4.56E+04 | 4.56E+04 | 4.56E+04 | NULL | AS | Q00577   | PURA     |
| 2521.1 | Collagen alpha-1(XXII) chain      | 0.00E+00 | 4.61E+04 | 4.61E+04 | 4.61E+04 | NULL | AS | Q8NFW1   | COL22A1  |
| 2412.1 | Transcription elongation factor   | 0.00E+00 | 4.63E+04 | 4.63E+04 | 4.63E+04 | NULL | AS | Q14241   | TCEB3    |
| 2165.1 | Exportin-T                        | 0.00E+00 | 4.65E+04 | 4.65E+04 | 4.65E+04 | NULL | AS | O43592   | XPOT     |
| 2910.1 | Zinc finger protein 253           | 0.00E+00 | 4.73E+04 | 4.73E+04 | 4.73E+04 | NULL | AS | O75346   | ZNF253   |
| 2741.1 | Fumarate hydratase, mitochond     | 0.00E+00 | 4.74E+04 | 4.74E+04 | 4.74E+04 | NULL | AS | P07954   | FH       |
| 2998.1 | Coiled-coil domain-containing p   | 0.00E+00 | 4.76E+04 | 4.76E+04 | 4.76E+04 | NULL | AS | J3KNW7   | CCDC41   |
| 2071.1 | Dihydropyrimidinase-related pro   | 0.00E+00 | 4.77E+04 | 4.77E+04 | 4.77E+04 | NULL | AS | O14531   | DPYSL4   |
| 3036.1 | RUN domain-containing protein     | 0.00E+00 | 4.81E+04 | 4.81E+04 | 4.81E+04 | NULL | AS | Q59EK9   | RUNDC3A  |
| 2238.1 | Lysine-specific demethylase 4D    | 0.00E+00 | 4.82E+04 | 4.82E+04 | 4.82E+04 | NULL | AS | Q6B0I6   | KDM4D    |



|        |                                   |          |          |          |          |      |    |          |         |
|--------|-----------------------------------|----------|----------|----------|----------|------|----|----------|---------|
| 1635.1 | Proteasomal ubiquitin receptor    | 0.00E+00 | 4.83E+04 | 4.83E+04 | 4.83E+04 | NULL | AS | Q16186   | ADRM1   |
| 2459.1 | Isoform 2 of AF4/FMR2 family r    | 0.00E+00 | 4.83E+04 | 4.83E+04 | 4.83E+04 | NULL | AS | P51826-2 | AFF3    |
| 2049.1 | Caspase recruitment domain-co     | 0.00E+00 | 4.87E+04 | 4.87E+04 | 4.87E+04 | NULL | AS | Q9BWT7   | CARD10  |
| 2879.1 | Putative unconventional myosin    | 0.00E+00 | 4.90E+04 | 4.90E+04 | 4.90E+04 | NULL | AS | Q96JP2   | MYO15B  |
| 2372.1 | Cornifin-B                        | 0.00E+00 | 4.93E+04 | 4.93E+04 | 4.93E+04 | NULL | AS | P22528   | SPRR1B  |
| 3199.1 | E3 ubiquitin-protein ligase TRIM  | 0.00E+00 | 4.96E+04 | 4.96E+04 | 4.96E+04 | NULL | AS | G8JLN1   | TRIM31  |
| 2091.1 | Coiled-coil domain-containing p   | 0.00E+00 | 4.98E+04 | 4.98E+04 | 4.98E+04 | NULL | AS | E9PKB1   | CCDC15  |
| 2943.1 | Signal transducer and activator   | 0.00E+00 | 4.98E+04 | 4.98E+04 | 4.98E+04 | NULL | AS | Q14765   | STAT4   |
| 1559.1 | SAFB-like transcription modulati  | 0.00E+00 | 5.03E+04 | 5.03E+04 | 5.03E+04 | NULL | AS | Q9NWH9   | SLTM    |
| 1264.1 | Echinoderm microtubule-associ     | 0.00E+00 | 5.05E+04 | 5.05E+04 | 5.05E+04 | NULL | AS | Q6ZMW3   | EML6    |
| 2462.1 | Ubiquilin-3                       | 0.00E+00 | 5.06E+04 | 5.06E+04 | 5.06E+04 | NULL | AS | Q9H347   | UBQLN3  |
| 2647.1 | Receptor tyrosine-protein kinas   | 0.00E+00 | 5.06E+04 | 5.06E+04 | 5.06E+04 | NULL | AS | Q15303   | ERBB4   |
| 2524.1 | Signal recognition particle 72 kD | 0.00E+00 | 5.08E+04 | 5.08E+04 | 5.08E+04 | NULL | AS | O76094   | SRP72   |
| 1201.1 | POC1 centriolar protein homolo    | 0.00E+00 | 5.10E+04 | 5.10E+04 | 5.10E+04 | NULL | AS | F8VV91   | POC1B   |
| 521.2  | Transducin-like enhancer protei   | 0.00E+00 | 5.12E+04 | 5.12E+04 | 5.12E+04 | NULL | AS | H0YL70   | TLE3    |
| 1608.1 | Cold shock domain containing E    | 0.00E+00 | 5.14E+04 | 5.14E+04 | 5.14E+04 | NULL | AS | G5E9Q2   | CSDE1   |
| 1685.1 | Kinesin-like protein KIF15        | 0.00E+00 | 5.17E+04 | 5.17E+04 | 5.17E+04 | NULL | AS | Q9NS87   | KIF15   |
| 1746.1 | Arf-GAP domain and FG repeat-     | 0.00E+00 | 5.17E+04 | 5.17E+04 | 5.17E+04 | NULL | AS | O95081   | AGFG2   |
| 2799.1 | PRKC apoptosis WT1 regulator      | 0.00E+00 | 5.17E+04 | 5.17E+04 | 5.17E+04 | NULL | AS | Q96IZ0   | PAWR    |
| 1589.1 | 60S ribosomal protein L17         | 0.00E+00 | 5.20E+04 | 5.20E+04 | 5.20E+04 | NULL | AS | P18621   | RPL17   |
| 1719.1 | Mitogen-activated protein kinas   | 0.00E+00 | 5.25E+04 | 5.25E+04 | 5.25E+04 | NULL | AS | Q02779   | MAP3K10 |
| 2966.1 | Arginyl-tRNA--protein transfera   | 0.00E+00 | 5.25E+04 | 5.25E+04 | 5.25E+04 | NULL | AS | O95260   | ATE1    |
| 2692.1 | Dermokine                         | 0.00E+00 | 5.28E+04 | 5.28E+04 | 5.28E+04 | NULL | AS | Q6E0U4   | DMKN    |
| 2640.1 | PTB-containing, cubilin and LRP   | 0.00E+00 | 5.31E+04 | 5.31E+04 | 5.31E+04 | NULL | AS | Q7Z2X4   | PID1    |
| 1890.1 | Ubiquitin-like-conjugating enzyr  | 0.00E+00 | 5.38E+04 | 5.38E+04 | 5.38E+04 | NULL | AS | Q9NT62   | ATG3    |
| 1941.1 | Golgi integral membrane protei    | 0.00E+00 | 5.38E+04 | 5.38E+04 | 5.38E+04 | NULL | AS | O00461   | GOLIM4  |
| 1257.1 | Nuclear receptor-binding factor   | 0.00E+00 | 5.44E+04 | 5.44E+04 | 5.44E+04 | NULL | AS | B4DWS0   | NRBF2   |
| 2431.1 | Ephrin type-B receptor 1          | 0.00E+00 | 5.46E+04 | 5.46E+04 | 5.46E+04 | NULL | AS | P54762   | EPHB1   |
| 1356.1 | Arrestin domain-containing prot   | 0.00E+00 | 5.49E+04 | 5.49E+04 | 5.49E+04 | NULL | AS | Q8TBH0   | ARRDC2  |
| 1517.1 | Armadillo repeat-containing pro   | 0.00E+00 | 5.53E+04 | 5.53E+04 | 5.53E+04 | NULL | AS | Q5W041   | ARMC3   |
| 2225.1 | Isoform 2 of Secernin-1           | 0.00E+00 | 5.53E+04 | 5.53E+04 | 5.53E+04 | NULL | AS | Q12765-2 | SCRN1   |
| 2949.1 | Biotinidase                       | 0.00E+00 | 5.53E+04 | 5.53E+04 | 5.53E+04 | NULL | AS | F8WCU5   | BTD     |
| 1823.1 | EMILIN-1                          | 0.00E+00 | 5.57E+04 | 5.57E+04 | 5.57E+04 | NULL | AS | Q9Y6C2   | EMILIN1 |
| 2710.1 | Adenosine deaminase-like prote    | 0.00E+00 | 5.68E+04 | 5.68E+04 | 5.68E+04 | NULL | AS | Q6DHV7   | ADAL    |
| 3222.1 | REST corepressor 1                | 0.00E+00 | 5.73E+04 | 5.73E+04 | 5.73E+04 | NULL | AS | J3KN32   | RCOR1   |

|        |                                   |          |          |          |          |      |    |          |          |
|--------|-----------------------------------|----------|----------|----------|----------|------|----|----------|----------|
| 1305.1 | Transforming growth factor-beta   | 0.00E+00 | 5.75E+04 | 5.75E+04 | 5.75E+04 | NULL | AS | Q8WUH2   | TGFBRAP1 |
| 5.2    | Keratin, type I cuticular Ha5     | 0.00E+00 | 5.77E+04 | 5.77E+04 | 5.77E+04 | NULL | AS | C4AM86   | KRT35    |
| 2347.1 | Transcription factor E4F1         | 0.00E+00 | 5.81E+04 | 5.81E+04 | 5.81E+04 | NULL | AS | Q66K89   | E4F1     |
| 3056.1 | PHD finger protein 6              | 0.00E+00 | 5.84E+04 | 5.84E+04 | 5.84E+04 | NULL | AS | E9PC97   | PHF6     |
| 2730.1 | Type I inositol 1,4,5-trisphospha | 0.00E+00 | 5.86E+04 | 5.86E+04 | 5.86E+04 | NULL | AS | Q14642   | INPP5A   |
| 2768.1 | Isoform Beta of Apoptosis reguli  | 0.00E+00 | 5.86E+04 | 5.86E+04 | 5.86E+04 | NULL | AS | Q07812-2 | BAX      |
| 2922.1 | Kinesin-like protein KIF24        | 0.00E+00 | 5.87E+04 | 5.87E+04 | 5.87E+04 | NULL | AS | Q5T7B8   | KIF24    |
| 2764.1 | Retinol dehydrogenase 11          | 0.00E+00 | 5.88E+04 | 5.88E+04 | 5.88E+04 | NULL | AS | G3V3K0   | RDH11    |
| 2138.1 | Semaphorin-3F                     | 0.00E+00 | 5.90E+04 | 5.90E+04 | 5.90E+04 | NULL | AS | Q13275   | SEMA3F   |
| 2646.1 | Coiled-coil domain-containing p   | 0.00E+00 | 5.90E+04 | 5.90E+04 | 5.90E+04 | NULL | AS | C9JGU1   | CCDC66   |
| 2829.1 | Isoform 2 of Peroxisomal acyl-cc  | 0.00E+00 | 5.90E+04 | 5.90E+04 | 5.90E+04 | NULL | AS | Q15067-2 | ACOX1    |
| 2006.1 | PHD finger protein 21A            | 0.00E+00 | 5.96E+04 | 5.96E+04 | 5.96E+04 | NULL | AS | Q96BD5   | PHF21A   |
| 2149.1 | Isoform 2 of Tapasin              | 0.00E+00 | 6.01E+04 | 6.01E+04 | 6.01E+04 | NULL | AS | O15533-2 | TAPBP    |
| 2335.1 | Calcium-binding protein 5         | 0.00E+00 | 6.01E+04 | 6.01E+04 | 6.01E+04 | NULL | AS | Q9NP86   | CABP5    |
| 2967.1 | EH domain-binding protein 1       | 0.00E+00 | 6.02E+04 | 6.02E+04 | 6.02E+04 | NULL | AS | Q8NDI1   | EHBP1    |
| 1740.1 | WD repeat-containing protein 7    | 0.00E+00 | 6.04E+04 | 6.04E+04 | 6.04E+04 | NULL | AS | Q9NW82   | WDR70    |
| 1600.1 | Protein SMIM12                    | 0.00E+00 | 6.06E+04 | 6.06E+04 | 6.06E+04 | NULL | AS | E5RH51   | SMIM12   |
| 1026.1 | Progesterone-induced-blocking     | 0.00E+00 | 6.09E+04 | 6.09E+04 | 6.09E+04 | NULL | AS | Q8WXW3   | PIBF1    |
| 2394.1 | Serine/threonine-protein kinase   | 0.00E+00 | 6.11E+04 | 6.11E+04 | 6.11E+04 | NULL | AS | Q9BVS4   | RIOK2    |
| 3092.1 | Isoform 2 of Perilipin-4          | 0.00E+00 | 6.15E+04 | 6.15E+04 | 6.15E+04 | NULL | AS | Q96Q06-2 | PLIN4    |
| 1558.1 | Zinc finger and SCAN domain-co    | 0.00E+00 | 6.16E+04 | 6.16E+04 | 6.16E+04 | NULL | AS | Q96SZ4   | ZSCAN10  |
| 2723.1 | Isoform 2 of TGF-beta receptor 1  | 0.00E+00 | 6.23E+04 | 6.23E+04 | 6.23E+04 | NULL | AS | P36897-2 | TGFB1    |
| 2781.1 | Lethal(3)malignant brain tumor-   | 0.00E+00 | 6.23E+04 | 6.23E+04 | 6.23E+04 | NULL | AS | Q8NA19   | L3MBTL4  |
| 3035.1 | Protein GREB1                     | 0.00E+00 | 6.24E+04 | 6.24E+04 | 6.24E+04 | NULL | AS | Q4ZG55   | GREB1    |
| 2994.1 | Isoform 3 of F-box only protein 1 | 0.00E+00 | 6.32E+04 | 6.32E+04 | 6.32E+04 | NULL | AS | O75426-3 | FBXO24   |
| 2126.1 | G antigen family E member 1       | 0.00E+00 | 6.33E+04 | 6.33E+04 | 6.33E+04 | NULL | AS | Q96GU1   | PAGE5    |
| 1720.1 | Melanoma-associated antigen B     | 0.00E+00 | 6.34E+04 | 6.34E+04 | 6.34E+04 | NULL | AS | A8MXT2   | MAGEB17  |
| 2582.1 | Isoform 6 of A-kinase anchor pr   | 0.00E+00 | 6.34E+04 | 6.34E+04 | 6.34E+04 | NULL | AS | Q99996-6 | AKAP9    |
| 3231.1 | Poly [ADP-ribose] polymerase 4    | 0.00E+00 | 6.34E+04 | 6.34E+04 | 6.34E+04 | NULL | AS | Q9UKK3   | PARP4    |
| 2147.1 | Zinc finger protein with KRAB ar  | 0.00E+00 | 6.40E+04 | 6.40E+04 | 6.40E+04 | NULL | AS | Q9BRR0   | ZKSCAN3  |
| 1135.1 | Eukaryotic translation initiation | 0.00E+00 | 6.42E+04 | 6.42E+04 | 6.42E+04 | NULL | AS | Q13347   | EIF3I    |
| 1410.1 | Methionine--tRNA ligase, mitocl   | 0.00E+00 | 6.42E+04 | 6.42E+04 | 6.42E+04 | NULL | AS | Q96GW9   | MARS2    |
| 1562.1 | Unconventional myosin-Id          | 0.00E+00 | 6.42E+04 | 6.42E+04 | 6.42E+04 | NULL | AS | O94832   | MYO1D    |
| 1856.1 | C-X-C motif chemokine 2           | 0.00E+00 | 6.42E+04 | 6.42E+04 | 6.42E+04 | NULL | AS | P19875   | CXCL2    |
| 2007.1 | Histone-lysine N-methyltransfer   | 0.00E+00 | 6.44E+04 | 6.44E+04 | 6.44E+04 | NULL | AS | Q9UMN6   | KMT2B    |

|        |                                   |          |          |          |          |      |    |          |          |
|--------|-----------------------------------|----------|----------|----------|----------|------|----|----------|----------|
| 1848.1 | Centrosome-associated protein     | 0.00E+00 | 6.48E+04 | 6.48E+04 | 6.48E+04 | NULL | AS | Q9BV73   | CEP250   |
| 2255.1 | Eukaryotic translation initiation | 0.00E+00 | 6.51E+04 | 6.51E+04 | 6.51E+04 | NULL | AS | P60228   | EIF3E    |
| 1946.1 | Quinone oxidoreductase            | 0.00E+00 | 6.55E+04 | 6.55E+04 | 6.55E+04 | NULL | AS | Q08257   | CRYZ     |
| 2220.1 | Transcription cofactor HES-6      | 0.00E+00 | 6.58E+04 | 6.58E+04 | 6.58E+04 | NULL | AS | Q96HZ4   | HES6     |
| 2706.1 | Sodium/potassium-transporting     | 0.00E+00 | 6.60E+04 | 6.60E+04 | 6.60E+04 | NULL | AS | Q13733   | ATP1A4   |
| 2473.1 | Integrin alpha-V                  | 0.00E+00 | 6.61E+04 | 6.61E+04 | 6.61E+04 | NULL | AS | P06756   | ITGAV    |
| 2286.1 | Speriolin                         | 0.00E+00 | 6.63E+04 | 6.63E+04 | 6.63E+04 | NULL | AS | Q76KD6   | SPATC1   |
| 985.1  | Ig kappa chain V-III region HIC   | 0.00E+00 | 6.64E+04 | 6.64E+04 | 6.64E+04 | NULL | AS | P18136   | KV313    |
| 2682.1 | B-cell CLL/lymphoma 7 protein f   | 0.00E+00 | 6.65E+04 | 6.65E+04 | 6.65E+04 | NULL | AS | F8WDZ4   | BCL7B    |
| 793.1  | Protein quaking                   | 0.00E+00 | 6.67E+04 | 6.67E+04 | 6.67E+04 | NULL | AS | Q96PU8   | QKI      |
| 1915.1 | Guanine nucleotide-binding pro    | 0.00E+00 | 6.78E+04 | 6.78E+04 | 6.78E+04 | NULL | AS | Q03113   | GNA12    |
| 1793.1 | Zinc finger protein 485           | 0.00E+00 | 6.79E+04 | 6.79E+04 | 6.79E+04 | NULL | AS | Q8NCK3   | ZNF485   |
| 921.1  | ADP-ribosylation factor-like prot | 0.00E+00 | 6.80E+04 | 6.80E+04 | 6.80E+04 | NULL | AS | P36405   | ARL3     |
| 1598.1 | Splicing factor 45                | 0.00E+00 | 6.82E+04 | 6.82E+04 | 6.82E+04 | NULL | AS | Q96I25   | RBM17    |
| 2303.1 | Proline-rich protein 7            | 0.00E+00 | 6.82E+04 | 6.82E+04 | 6.82E+04 | NULL | AS | Q8TB68   | PRR7     |
| 2330.1 | cAMP-responsive element-bindi     | 0.00E+00 | 6.82E+04 | 6.82E+04 | 6.82E+04 | NULL | AS | O60519   | CREBL2   |
| 3129.1 | Inositol 1,4,5-trisphosphate rece | 0.00E+00 | 6.83E+04 | 6.83E+04 | 6.83E+04 | NULL | AS | Q14643   | ITPR1    |
| 2454.1 | Myosin-15                         | 0.00E+00 | 6.84E+04 | 6.84E+04 | 6.84E+04 | NULL | AS | Q9Y2K3   | MYH15    |
| 997.1  | Methylosome protein 50            | 0.00E+00 | 6.88E+04 | 6.88E+04 | 6.88E+04 | NULL | AS | Q9BQA1   | WDR77    |
| 2500.1 | Isoform 2 of Protein TANC2        | 0.00E+00 | 6.92E+04 | 6.92E+04 | 6.92E+04 | NULL | AS | Q9HCD6-2 | TANC2    |
| 3162.1 | Cholecystokinin receptor type A   | 0.00E+00 | 6.95E+04 | 6.95E+04 | 6.95E+04 | NULL | AS | P32238   | CCKAR    |
| 509.1  | Alpha/beta hydrolase domain-c     | 0.00E+00 | 6.97E+04 | 6.97E+04 | 6.97E+04 | NULL | AS | Q8NFV4   | ABHD11   |
| 1500.1 | Whirlin                           | 0.00E+00 | 7.08E+04 | 7.08E+04 | 7.08E+04 | NULL | AS | Q9P202   | DFNB31   |
| 1539.1 | SH2 domain-containing protein     | 0.00E+00 | 7.09E+04 | 7.09E+04 | 7.09E+04 | NULL | AS | A6NKC9   | SH2D7    |
| 910.1  | Microsomal triglyceride transfer  | 0.00E+00 | 7.14E+04 | 7.14E+04 | 7.14E+04 | NULL | AS | E9PBP6   | MTTP     |
| 935.1  | RNA-binding protein 25            | 0.00E+00 | 7.18E+04 | 7.18E+04 | 7.18E+04 | NULL | AS | P49756   | RBM25    |
| 2515.1 | Coiled-coil domain-containing p   | 0.00E+00 | 7.19E+04 | 7.19E+04 | 7.19E+04 | NULL | AS | B8ZZV3   | CCDC148  |
| 1570.1 | Large neutral amino acids transp  | 0.00E+00 | 7.21E+04 | 7.21E+04 | 7.21E+04 | NULL | AS | Q9UHI5   | SLC7A8   |
| 2023.1 | Isoform 2 of Probable gluconoki   | 0.00E+00 | 7.23E+04 | 7.23E+04 | 7.23E+04 | NULL | AS | Q5T6J7-2 | IDNK     |
| 2343.1 | Phosphatidylinositol 4,5-bispho:  | 0.00E+00 | 7.27E+04 | 7.27E+04 | 7.27E+04 | NULL | AS | Q15735   | INPP5J   |
| 1419.1 | Isoform 3 of Protein PRRC2A       | 0.00E+00 | 7.29E+04 | 7.29E+04 | 7.29E+04 | NULL | AS | P48634-3 | PRRC2A   |
| 667.1  | Metallothionein-1G                | 0.00E+00 | 7.31E+04 | 7.31E+04 | 7.31E+04 | NULL | AS | P13640   | MT1G     |
| 1628.1 | Transgelin-3                      | 0.00E+00 | 7.35E+04 | 7.35E+04 | 7.35E+04 | NULL | AS | Q9UI15   | TAGLN3   |
| 1953.1 | Rho guanine nucleotide exchang    | 0.00E+00 | 7.37E+04 | 7.37E+04 | 7.37E+04 | NULL | AS | Q8N1W1   | ARHGEF28 |
| 2218.1 | Tankyrase-2                       | 0.00E+00 | 7.44E+04 | 7.44E+04 | 7.44E+04 | NULL | AS | Q9H2K2   | TNKS2    |

|        |                                   |          |          |          |          |      |    |          |              |
|--------|-----------------------------------|----------|----------|----------|----------|------|----|----------|--------------|
| 2725.1 | Aldose reductase                  | 0.00E+00 | 7.47E+04 | 7.47E+04 | 7.47E+04 | NULL | AS | P15121   | AKR1B1       |
| 1094.1 | Pre-mRNA-splicing factor RBM2     | 0.00E+00 | 7.48E+04 | 7.48E+04 | 7.48E+04 | NULL | AS | Q9NW64   | RBM22        |
| 2744.1 | Actin filament-associated protei  | 0.00E+00 | 7.51E+04 | 7.51E+04 | 7.51E+04 | NULL | AS | Q8TED9   | AFAP1L1      |
| 1253.1 | Maleylacetoacetate isomerase      | 0.00E+00 | 7.55E+04 | 7.55E+04 | 7.55E+04 | NULL | AS | O43708   | GSTZ1        |
| 2166.1 | Isoform 3 of Deleted in lung and  | 0.00E+00 | 7.61E+04 | 7.61E+04 | 7.61E+04 | NULL | AS | Q9Y238-3 | DLEC1        |
| 3107.1 | Zinc finger protein 221           | 0.00E+00 | 7.63E+04 | 7.63E+04 | 7.63E+04 | NULL | AS | Q9UK13   | ZNF221       |
| 2624.1 | Pre-mRNA-splicing factor SYF1     | 0.00E+00 | 7.66E+04 | 7.66E+04 | 7.66E+04 | NULL | AS | Q9HCS7   | XAB2         |
| 1524.1 | Protein SFI1 homolog              | 0.00E+00 | 7.67E+04 | 7.67E+04 | 7.67E+04 | NULL | AS | A8K8P3   | SFI1         |
| 1553.1 | ADP/ATP translocase 3             | 0.00E+00 | 7.67E+04 | 7.67E+04 | 7.67E+04 | NULL | AS | P12236   | SLC25A6      |
| 2808.1 | Calcium-binding protein 39        | 0.00E+00 | 7.67E+04 | 7.67E+04 | 7.67E+04 | NULL | AS | Q9Y376   | CAB39        |
| 3237.1 | rRNA-processing protein UTP23     | 0.00E+00 | 7.67E+04 | 7.67E+04 | 7.67E+04 | NULL | AS | Q9BRU9   | UTP23        |
| 2674.1 | 2-oxoisovalerate dehydrogenase    | 0.00E+00 | 7.72E+04 | 7.72E+04 | 7.72E+04 | NULL | AS | P21953   | BCKDHB       |
| 2869.1 | Transmembrane protease serine     | 0.00E+00 | 7.73E+04 | 7.73E+04 | 7.73E+04 | NULL | AS | Q7Z410   | TMPRSS9      |
| 1346.1 | GTP-binding protein SAR1b         | 0.00E+00 | 7.76E+04 | 7.76E+04 | 7.76E+04 | NULL | AS | Q9Y6B6   | SAR1B        |
| 2602.1 | HAUS augmin-like complex subu     | 0.00E+00 | 7.77E+04 | 7.77E+04 | 7.77E+04 | NULL | AS | Q9H6D7   | HAUS4        |
| 1828.1 | Cyclin-dependent kinase inhibito  | 0.00E+00 | 7.83E+04 | 7.83E+04 | 7.83E+04 | NULL | AS | J3KQV0   | CDKN1A       |
| 987.1  | Perilipin-3                       | 0.00E+00 | 7.86E+04 | 7.86E+04 | 7.86E+04 | NULL | AS | O60664   | PLIN3        |
| 1767.1 | Eukaryotic translation initiation | 0.00E+00 | 7.87E+04 | 7.87E+04 | 7.87E+04 | NULL | AS | B0QY89   | EIF3L        |
| 1845.1 | Isoform 2 of Eukaryotic translati | 0.00E+00 | 7.87E+04 | 7.87E+04 | 7.87E+04 | NULL | AS | P55884-2 | EIF3B        |
| 2259.1 | Dimethyladenosine transferase     | 0.00E+00 | 7.93E+04 | 7.93E+04 | 7.93E+04 | NULL | AS | Q9H5Q4   | TFB2M        |
| 2381.1 | Protein LOC100652824              | 0.00E+00 | 7.98E+04 | 7.98E+04 | 7.98E+04 | NULL | AS | F5H626   | LOC100652824 |
| 1709.1 | Acidic leucine-rich nuclear phos  | 0.00E+00 | 7.99E+04 | 7.99E+04 | 7.99E+04 | NULL | AS | O95626   | ANP32D       |
| 2972.1 | Putative ATP-dependent RNA he     | 0.00E+00 | 7.99E+04 | 7.99E+04 | 7.99E+04 | NULL | AS | Q9H6R0   | DHX33        |
| 2882.1 | Beta-crystallin A3                | 0.00E+00 | 8.00E+04 | 8.00E+04 | 8.00E+04 | NULL | AS | P05813   | CRYBA1       |
| 2801.1 | Laminin subunit alpha-4           | 0.00E+00 | 8.08E+04 | 8.08E+04 | 8.08E+04 | NULL | AS | Q16363   | LAMA4        |
| 1585.1 | Zinc finger protein 616           | 0.00E+00 | 8.09E+04 | 8.09E+04 | 8.09E+04 | NULL | AS | Q08AN1   | ZNF616       |
| 1854.1 | Lamina-associated polypeptide     | 0.00E+00 | 8.09E+04 | 8.09E+04 | 8.09E+04 | NULL | AS | P42166   | TMPO         |
| 2804.1 | MICAL C-terminal-like protein     | 0.00E+00 | 8.11E+04 | 8.11E+04 | 8.11E+04 | NULL | AS | Q6ZW33   | MICALCL      |
| 1813.1 | 60S ribosomal protein L14         | 0.00E+00 | 8.15E+04 | 8.15E+04 | 8.15E+04 | NULL | AS | P50914   | RPL14        |
| 2374.1 | TBC1 domain family member 26      | 0.00E+00 | 8.16E+04 | 8.16E+04 | 8.16E+04 | NULL | AS | Q86UD7   | TBC1D26      |
| 1104.1 | HIV Tat-specific factor 1         | 0.00E+00 | 8.37E+04 | 8.37E+04 | 8.37E+04 | NULL | AS | O43719   | HTATSF1      |
| 2491.1 | Unconventional myosin-XVIIIb      | 0.00E+00 | 8.39E+04 | 8.39E+04 | 8.39E+04 | NULL | AS | F5GXR6   | MYO18B       |
| 2270.1 | Isoform 3 of Tyrosine-protein kii | 0.00E+00 | 8.43E+04 | 8.43E+04 | 8.43E+04 | NULL | AS | P06239-3 | LCK          |
| 1886.1 | Calcium-dependent secretion ac    | 0.00E+00 | 8.54E+04 | 8.54E+04 | 8.54E+04 | NULL | AS | Q86UW7   | CADPS2       |
| 1744.1 | Bone morphogenetic protein 3      | 0.00E+00 | 8.55E+04 | 8.55E+04 | 8.55E+04 | NULL | AS | P12645   | BMP3         |

|        |                                            |          |          |          |          |      |    |          |          |
|--------|--------------------------------------------|----------|----------|----------|----------|------|----|----------|----------|
| 1960.1 | Cleavage stimulation factor subunit 1      | 0.00E+00 | 8.58E+04 | 8.58E+04 | 8.58E+04 | NULL | AS | Q05048   | CSTF1    |
| 2061.1 | Isoform Mitochondrial of Lysine            | 0.00E+00 | 8.61E+04 | 8.61E+04 | 8.61E+04 | NULL | AS | Q15046-2 | KARS     |
| 2908.1 | snRNA-activating protein complex 1         | 0.00E+00 | 8.61E+04 | 8.61E+04 | 8.61E+04 | NULL | AS | O75971   | SNAPC5   |
| 2486.1 | Homeobox protein ARX                       | 0.00E+00 | 8.62E+04 | 8.62E+04 | 8.62E+04 | NULL | AS | Q96QS3   | ARX      |
| 1695.1 | AP2-associated protein kinase 1            | 0.00E+00 | 8.69E+04 | 8.69E+04 | 8.69E+04 | NULL | AS | Q2M2I8   | AAK1     |
| 1689.1 | Dual specificity tyrosine-phosphatase 1    | 0.00E+00 | 8.78E+04 | 8.78E+04 | 8.78E+04 | NULL | AS | Q13627   | DYRK1A   |
| 2791.1 | Protein FAM118A                            | 0.00E+00 | 8.79E+04 | 8.79E+04 | 8.79E+04 | NULL | AS | Q9NWS6   | FAM118A  |
| 2728.1 | Reelin                                     | 0.00E+00 | 8.85E+04 | 8.85E+04 | 8.85E+04 | NULL | AS | J3KQ66   | RELN     |
| 2022.1 | 72 kDa type IV collagenase                 | 0.00E+00 | 8.87E+04 | 8.87E+04 | 8.87E+04 | NULL | AS | P08253   | MMP2     |
| 1609.1 | Anamorsin                                  | 0.00E+00 | 8.91E+04 | 8.91E+04 | 8.91E+04 | NULL | AS | Q6FI81   | CIAPIN1  |
| 1471.1 | WD repeat-containing protein 3             | 0.00E+00 | 8.96E+04 | 8.96E+04 | 8.96E+04 | NULL | AS | Q8NI36   | WDR36    |
| 2540.1 | Nucleoside diphosphate-linked moiety HMG   | 0.00E+00 | 8.96E+04 | 8.96E+04 | 8.96E+04 | NULL | AS | P0C025   | NUDT17   |
| 2388.1 | Ankyrin repeat domain-containing protein 1 | 0.00E+00 | 9.00E+04 | 9.00E+04 | 9.00E+04 | NULL | AS | Q8IVF6   | ANKRD18A |
| 1798.1 | Methionine aminopeptidase 2                | 0.00E+00 | 9.06E+04 | 9.06E+04 | 9.06E+04 | NULL | AS | P50579   | METAP2   |
| 3256.1 | HCG1818442, isoform CRA_a                  | 0.00E+00 | 9.06E+04 | 9.06E+04 | 9.06E+04 | NULL | AS | I3L4Q0   | FAM195B  |
| 2076.1 | Protein fantom                             | 0.00E+00 | 9.08E+04 | 9.08E+04 | 9.08E+04 | NULL | AS | Q68CZ1   | RPGRIP1L |
| 2299.1 | Coiled-coil domain-containing protein 1    | 0.00E+00 | 9.29E+04 | 9.29E+04 | 9.29E+04 | NULL | AS | Q2M329   | CCDC96   |
| 2242.1 | Protein Wnt                                | 0.00E+00 | 9.32E+04 | 9.32E+04 | 9.32E+04 | NULL | AS | D6RF47   | WNT8A    |
| 2884.1 | Alpha-1D adrenergic receptor               | 0.00E+00 | 9.32E+04 | 9.32E+04 | 9.32E+04 | NULL | AS | P25100   | ADRA1D   |
| 3139.1 | Prostaglandin F2-alpha receptor            | 0.00E+00 | 9.32E+04 | 9.32E+04 | 9.32E+04 | NULL | AS | P43088   | PTGFR    |
| 1527.1 | Wee1-like protein kinase 2                 | 0.00E+00 | 9.36E+04 | 9.36E+04 | 9.36E+04 | NULL | AS | P0C1S8   | WEE2     |
| 1245.1 | AP-2 complex subunit alpha-1               | 0.00E+00 | 9.40E+04 | 9.40E+04 | 9.40E+04 | NULL | AS | O95782   | AP2A1    |
| 1112.1 | Plexin-A1                                  | 0.00E+00 | 9.41E+04 | 9.41E+04 | 9.41E+04 | NULL | AS | Q9UIW2   | PLXNA1   |
| 2471.1 | Nucleolar and spindle-associated protein 1 | 0.00E+00 | 9.43E+04 | 9.43E+04 | 9.43E+04 | NULL | AS | Q9BXS6   | NUSAP1   |
| 2950.1 | B-cell CLL/lymphoma 6 member               | 0.00E+00 | 9.48E+04 | 9.48E+04 | 9.48E+04 | NULL | AS | Q8N143   | BCL6B    |
| 1428.1 | Isoform 4 of Nitrilase homolog 1           | 0.00E+00 | 9.52E+04 | 9.52E+04 | 9.52E+04 | NULL | AS | Q86X76-3 | NIT1     |
| 2315.1 | Thiosulfate sulfurtransferase              | 0.00E+00 | 9.57E+04 | 9.57E+04 | 9.57E+04 | NULL | AS | Q16762   | TST      |
| 1555.1 | Insulin receptor-related protein           | 0.00E+00 | 9.59E+04 | 9.59E+04 | 9.59E+04 | NULL | AS | P14616   | INSRR    |
| 2984.1 | Ceramide synthase 3                        | 0.00E+00 | 9.62E+04 | 9.62E+04 | 9.62E+04 | NULL | AS | Q8IU89   | CERS3    |
| 741.1  | Prefoldin subunit 3                        | 0.00E+00 | 9.64E+04 | 9.64E+04 | 9.64E+04 | NULL | AS | P61758   | VBP1     |
| 1204.1 | Ubiquitin-conjugating enzyme E2            | 0.00E+00 | 9.66E+04 | 9.66E+04 | 9.66E+04 | NULL | AS | P49459   | UBE2A    |
| 2033.1 | Glycerol kinase                            | 0.00E+00 | 9.69E+04 | 9.69E+04 | 9.69E+04 | NULL | AS | F8WC39   | GK       |
| 1436.1 | Probable allantoinase                      | 0.00E+00 | 9.75E+04 | 9.75E+04 | 9.75E+04 | NULL | AS | Q8N6M5   | ALLC     |
| 1084.1 | Centrosomal protein POC5                   | 0.00E+00 | 9.82E+04 | 9.82E+04 | 9.82E+04 | NULL | AS | Q8NA72   | POC5     |
| 1611.1 | La-related protein 6                       | 0.00E+00 | 9.83E+04 | 9.83E+04 | 9.83E+04 | NULL | AS | Q9BRS8   | LARP6    |

|        |                                  |          |          |          |          |      |    |          |          |
|--------|----------------------------------|----------|----------|----------|----------|------|----|----------|----------|
| 2206.1 | Exonuclease 3'-5' domain-conta   | 0.00E+00 | 9.83E+04 | 9.83E+04 | 9.83E+04 | NULL | AS | B7Z839   | EXD1     |
| 3078.1 | Macrophage erythroblast attack   | 0.00E+00 | 9.83E+04 | 9.83E+04 | 9.83E+04 | NULL | AS | E7ESC7   | MAEA     |
| 2408.1 | Dimethylaniline monooxygenase    | 0.00E+00 | 9.93E+04 | 9.93E+04 | 9.93E+04 | NULL | AS | B7Z3P4   | FMO1     |
| 2198.1 | Bifunctional methylenetetrahyd   | 0.00E+00 | 1.00E+05 | 1.00E+05 | 1.00E+05 | NULL | AS | P13995   | MTHFD2   |
| 2724.1 | Growth arrest-specific protein 7 | 0.00E+00 | 1.01E+05 | 1.01E+05 | 1.01E+05 | NULL | AS | O60861   | GAS7     |
| 2839.1 | Polycystic kidney disease protei | 0.00E+00 | 1.01E+05 | 1.01E+05 | 1.01E+05 | NULL | AS | Q8TDX9   | PKD1L1   |
| 2915.1 | Isoform 3 of Forkhead-associate  | 0.00E+00 | 1.01E+05 | 1.01E+05 | 1.01E+05 | NULL | AS | B1AJZ9-3 | FHAD1    |
| 3083.1 | DENN domain-containing protei    | 0.00E+00 | 1.01E+05 | 1.01E+05 | 1.01E+05 | NULL | AS | Q9ULE3   | DENND2A  |
| 1123.1 | Glutaryl-CoA dehydrogenase, m    | 0.00E+00 | 1.02E+05 | 1.02E+05 | 1.02E+05 | NULL | AS | Q92947   | GCDH     |
| 1819.1 | SH3 and cysteine-rich domain-cr  | 0.00E+00 | 1.02E+05 | 1.02E+05 | 1.02E+05 | NULL | AS | Q96MF2   | STAC3    |
| 2301.1 | Kinesin-like protein KIF27       | 0.00E+00 | 1.02E+05 | 1.02E+05 | 1.02E+05 | NULL | AS | Q86VH2   | KIF27    |
| 3020.1 | Isoform 5 of Afadin              | 0.00E+00 | 1.02E+05 | 1.02E+05 | 1.02E+05 | NULL | AS | P55196-5 | MLLT4    |
| 3069.1 | Grancalcin                       | 0.00E+00 | 1.03E+05 | 1.03E+05 | 1.03E+05 | NULL | AS | P28676   | GCA      |
| 1199.1 | Isoform 2 of Splicing factor U2A | 0.00E+00 | 1.04E+05 | 1.04E+05 | 1.04E+05 | NULL | AS | Q01081-2 | U2AF1    |
| 1568.1 | V-type proton ATPase 116 kDa s   | 0.00E+00 | 1.05E+05 | 1.05E+05 | 1.05E+05 | NULL | AS | Q9HBG4   | ATP6V0A4 |
| 2810.1 | Nucleolar protein of 40 kDa      | 0.00E+00 | 1.05E+05 | 1.05E+05 | 1.05E+05 | NULL | AS | E7EPF0   | ZCCHC17  |
| 2953.1 | Arf-GAP with dual PH domain-cc   | 0.00E+00 | 1.05E+05 | 1.05E+05 | 1.05E+05 | NULL | AS | Q2V6Q1   | CENTA2   |
| 996.1  | Janus kinase and microtubule-in  | 0.00E+00 | 1.06E+05 | 1.06E+05 | 1.06E+05 | NULL | AS | Q5VZ66   | JAKMIP3  |
| 1421.1 | C-C motif chemokine 5            | 0.00E+00 | 1.06E+05 | 1.06E+05 | 1.06E+05 | NULL | AS | P13501   | CCL5     |
| 2167.1 | Dopamine beta-hydroxylase        | 0.00E+00 | 1.06E+05 | 1.06E+05 | 1.06E+05 | NULL | AS | P09172   | DBH      |
| 1188.1 | Transmembrane protein 131        | 0.00E+00 | 1.07E+05 | 1.07E+05 | 1.07E+05 | NULL | AS | Q92545   | TMEM131  |
| 2488.1 | Laminin subunit alpha-3          | 0.00E+00 | 1.07E+05 | 1.07E+05 | 1.07E+05 | NULL | AS | Q16787   | LAMA3    |
| 2596.1 | Periostin                        | 0.00E+00 | 1.07E+05 | 1.07E+05 | 1.07E+05 | NULL | AS | Q15063   | POSTN    |
| 717.1  | Histone H1.5                     | 0.00E+00 | 1.08E+05 | 1.08E+05 | 1.08E+05 | NULL | AS | P16401   | HIST1H1B |
| 1189.1 | T-cell surface protein tactile   | 0.00E+00 | 1.08E+05 | 1.08E+05 | 1.08E+05 | NULL | AS | P40200   | CD96     |
| 1614.1 | Cancer/testis antigen 75         | 0.00E+00 | 1.08E+05 | 1.08E+05 | 1.08E+05 | NULL | AS | Q6PK30   | CT75     |
| 1622.1 | Cytoplasmic polyadenylation ele  | 0.00E+00 | 1.08E+05 | 1.08E+05 | 1.08E+05 | NULL | AS | Q17RY0   | CPEB4    |
| 2038.1 | Podoplanin                       | 0.00E+00 | 1.08E+05 | 1.08E+05 | 1.08E+05 | NULL | AS | D6RH07   | PDPN     |
| 2093.1 | Inositol polyphosphate-5-phosp   | 0.00E+00 | 1.08E+05 | 1.08E+05 | 1.08E+05 | NULL | AS | B1ARF3   | INPP5B   |
| 2775.1 | Protein NipSnap homolog 2        | 0.00E+00 | 1.08E+05 | 1.08E+05 | 1.08E+05 | NULL | AS | O75323   | GBAS     |
| 2889.1 | Zinc finger protein 608          | 0.00E+00 | 1.08E+05 | 1.08E+05 | 1.08E+05 | NULL | AS | Q9ULD9   | ZNF608   |
| 3153.1 | Protein FAM83G                   | 0.00E+00 | 1.08E+05 | 1.08E+05 | 1.08E+05 | NULL | AS | A6ND36   | FAM83G   |
| 1864.1 | ATP-dependent DNA helicase Q1    | 0.00E+00 | 1.09E+05 | 1.09E+05 | 1.09E+05 | NULL | AS | O94762   | RECQL5   |
| 2333.1 | Phakinin                         | 0.00E+00 | 1.09E+05 | 1.09E+05 | 1.09E+05 | NULL | AS | Q13515   | BFSP2    |
| 3053.1 | Thiosulfate sulfurtransferase/rh | 0.00E+00 | 1.09E+05 | 1.09E+05 | 1.09E+05 | NULL | AS | Q5T7W7   | TSTD2    |

|        |                                   |          |          |          |          |      |    |          |          |
|--------|-----------------------------------|----------|----------|----------|----------|------|----|----------|----------|
| 1224.1 | HCF N-terminal chain 5            | 0.00E+00 | 1.10E+05 | 1.10E+05 | 1.10E+05 | NULL | AS | A6NEM2   | HCFC1    |
| 1629.1 | F-box/LRR-repeat protein 14       | 0.00E+00 | 1.11E+05 | 1.11E+05 | 1.11E+05 | NULL | AS | Q8N1E6   | FBXL14   |
| 2446.1 | Lipolysis-stimulated lipoprotein  | 0.00E+00 | 1.11E+05 | 1.11E+05 | 1.11E+05 | NULL | AS | B4DKL4   | LSR      |
| 2778.1 | Probable global transcription ac  | 0.00E+00 | 1.11E+05 | 1.11E+05 | 1.11E+05 | NULL | AS | P28370   | SMARCA1  |
| 3201.1 | Serpin B8                         | 0.00E+00 | 1.11E+05 | 1.11E+05 | 1.11E+05 | NULL | AS | P50452   | SERPINB8 |
| 908.1  | AP-2 complex subunit mu           | 0.00E+00 | 1.12E+05 | 1.12E+05 | 1.12E+05 | NULL | AS | E9PFW3   | AP2M1    |
| 1179.1 | Isoform 3 of Serine/threonine-p   | 0.00E+00 | 1.12E+05 | 1.12E+05 | 1.12E+05 | NULL | AS | Q96PY6-3 | NEK1     |
| 1686.1 | Exportin-6                        | 0.00E+00 | 1.12E+05 | 1.12E+05 | 1.12E+05 | NULL | AS | Q96QU8   | XPO6     |
| 756.1  | Coproporphyrinogen-III oxidase,   | 0.00E+00 | 1.13E+05 | 1.13E+05 | 1.13E+05 | NULL | AS | P36551   | CPOX     |
| 1895.1 | Filamin A-interacting protein 1-l | 0.00E+00 | 1.13E+05 | 1.13E+05 | 1.13E+05 | NULL | AS | Q4L180   | FILIP1L  |
| 1906.1 | Sonic hedgehog protein            | 0.00E+00 | 1.13E+05 | 1.13E+05 | 1.13E+05 | NULL | AS | Q15465   | SHH      |
| 2401.1 | Isoform 2 of Bromodomain-cont     | 0.00E+00 | 1.13E+05 | 1.13E+05 | 1.13E+05 | NULL | AS | O95696-2 | BRD1     |
| 1234.1 | Prolow-density lipoprotein rece   | 0.00E+00 | 1.14E+05 | 1.14E+05 | 1.14E+05 | NULL | AS | Q07954   | LRP1     |
| 2649.1 | Protein polybromo-1               | 0.00E+00 | 1.14E+05 | 1.14E+05 | 1.14E+05 | NULL | AS | Q86U86   | PBRM1    |
| 3.7    | Keratin, type II cytoskeletal 1b  | 0.00E+00 | 1.16E+05 | 1.16E+05 | 1.16E+05 | NULL | AS | Q7Z794   | KRT77    |
| 787.1  | Probable ATP-dependent RNA h      | 0.00E+00 | 1.16E+05 | 1.16E+05 | 1.16E+05 | NULL | AS | Q9BUQ8   | DDX23    |
| 3190.1 | CAP-Gly domain-containing link    | 0.00E+00 | 1.16E+05 | 1.16E+05 | 1.16E+05 | NULL | AS | P30622   | CLIP1    |
| 1337.1 | Ubiquitin carboxyl-terminal hyd   | 0.00E+00 | 1.17E+05 | 1.17E+05 | 1.17E+05 | NULL | AS | Q70EL4   | USP43    |
| 1448.1 | Activated CDC42 kinase 1          | 0.00E+00 | 1.17E+05 | 1.17E+05 | 1.17E+05 | NULL | AS | C9J1X3   | TNK2     |
| 1498.1 | Vesicle transport through intera  | 0.00E+00 | 1.17E+05 | 1.17E+05 | 1.17E+05 | NULL | AS | Q9UEU0   | VTI1B    |
| 2609.1 | Protein kinase C theta type       | 0.00E+00 | 1.17E+05 | 1.17E+05 | 1.17E+05 | NULL | AS | Q04759   | PRKCC    |
| 2806.1 | Pleckstrin homology domain-coi    | 0.00E+00 | 1.17E+05 | 1.17E+05 | 1.17E+05 | NULL | AS | Q8IVE3   | PLEKHH2  |
| 1518.1 | Protein unc-13 homolog C          | 0.00E+00 | 1.18E+05 | 1.18E+05 | 1.18E+05 | NULL | AS | F5H090   | UNC13C   |
| 1780.1 | Serine/threonine-protein kinase   | 0.00E+00 | 1.18E+05 | 1.18E+05 | 1.18E+05 | NULL | AS | Q7L7X3   | TAOK1    |
| 2390.1 | VPS10 domain-containing recep     | 0.00E+00 | 1.18E+05 | 1.18E+05 | 1.18E+05 | NULL | AS | Q96PQ0   | SORCS2   |
| 2584.1 | Isoform 2 of C-type lectin domai  | 0.00E+00 | 1.18E+05 | 1.18E+05 | 1.18E+05 | NULL | AS | A5D8T8-2 | CLEC18A  |
| 2251.1 | Beta-ureidopropionase             | 0.00E+00 | 1.19E+05 | 1.19E+05 | 1.19E+05 | NULL | AS | Q9UBR1   | UPB1     |
| 1212.1 | Isoform 2 of mRNA cap guanine     | 0.00E+00 | 1.20E+05 | 1.20E+05 | 1.20E+05 | NULL | AS | O43148-2 | RNMT     |
| 2505.1 | Histone acetyltransferase p300    | 0.00E+00 | 1.20E+05 | 1.20E+05 | 1.20E+05 | NULL | AS | Q09472   | EP300    |
| 2919.1 | Pro-epidermal growth factor       | 0.00E+00 | 1.20E+05 | 1.20E+05 | 1.20E+05 | NULL | AS | P01133   | EGF      |
| 1194.1 | Protein PML                       | 0.00E+00 | 1.21E+05 | 1.21E+05 | 1.21E+05 | NULL | AS | P29590   | PML      |
| 2440.1 | Isoform 2 of Plexin-A2            | 0.00E+00 | 1.21E+05 | 1.21E+05 | 1.21E+05 | NULL | AS | O75051-2 | PLXNA2   |
| 1425.1 | Glycogen [starch] synthase, mus   | 0.00E+00 | 1.23E+05 | 1.23E+05 | 1.23E+05 | NULL | AS | F5H1N8   | GYS1     |
| 1717.1 | Isoform 2 of Acid-sensing ion ch  | 0.00E+00 | 1.23E+05 | 1.23E+05 | 1.23E+05 | NULL | AS | Q16515-2 | ASIC2    |
| 3136.1 | Tektin-5                          | 0.00E+00 | 1.23E+05 | 1.23E+05 | 1.23E+05 | NULL | AS | Q96M29   | TEKT5    |

|        |                                  |          |          |          |          |      |    |          |          |
|--------|----------------------------------|----------|----------|----------|----------|------|----|----------|----------|
| 839.1  | 26S protease regulatory subunit  | 0.00E+00 | 1.24E+05 | 1.24E+05 | 1.24E+05 | NULL | AS | P62191   | PSMC1    |
| 944.1  | Serine racemase                  | 0.00E+00 | 1.24E+05 | 1.24E+05 | 1.24E+05 | NULL | AS | Q9GZT4   | SRR      |
| 1605.1 | Ribosome-recycling factor, mito  | 0.00E+00 | 1.24E+05 | 1.24E+05 | 1.24E+05 | NULL | AS | Q96E11   | MRRF     |
| 1735.1 | Limbic system-associated memk    | 0.00E+00 | 1.24E+05 | 1.24E+05 | 1.24E+05 | NULL | AS | F5H5G1   | LSAMP    |
| 2452.1 | Isoform 3 of CD99 antigen-like p | 0.00E+00 | 1.24E+05 | 1.24E+05 | 1.24E+05 | NULL | AS | Q8TCZ2-3 | CD99L2   |
| 3080.1 | Protein transport protein Sec31. | 0.00E+00 | 1.24E+05 | 1.24E+05 | 1.24E+05 | NULL | AS | D6RAB3   | SEC31A   |
| 1372.1 | Ubiquitin carboxyl-terminal hyd  | 0.00E+00 | 1.25E+05 | 1.25E+05 | 1.25E+05 | NULL | AS | Q8NB14   | USP38    |
| 1208.1 | Glycerophosphocholine phosph     | 0.00E+00 | 1.26E+05 | 1.26E+05 | 1.26E+05 | NULL | AS | Q9NPB8   | GPCPD1   |
| 1902.1 | Transcription factor 25          | 0.00E+00 | 1.27E+05 | 1.27E+05 | 1.27E+05 | NULL | AS | Q9BQ70   | TCF25    |
| 2310.1 | Copine-9                         | 0.00E+00 | 1.27E+05 | 1.27E+05 | 1.27E+05 | NULL | AS | Q8IYJ1   | CPNE9    |
| 2664.1 | 26S proteasome non-ATPase re     | 0.00E+00 | 1.27E+05 | 1.27E+05 | 1.27E+05 | NULL | AS | O00232   | PSMD12   |
| 2887.1 | Rho guanine nucleotide exchan    | 0.00E+00 | 1.27E+05 | 1.27E+05 | 1.27E+05 | NULL | AS | Q12774   | ARHGEF5  |
| 2932.1 | Arginine and glutamate-rich pro  | 0.00E+00 | 1.27E+05 | 1.27E+05 | 1.27E+05 | NULL | AS | Q9NWB6   | ARGLU1   |
| 690.1  | Ester hydrolase C11orf54         | 0.00E+00 | 1.28E+05 | 1.28E+05 | 1.28E+05 | NULL | AS | Q9H0W9   | C11orf54 |
| 1926.1 | Isoform 2 of Zinc finger protein | 0.00E+00 | 1.28E+05 | 1.28E+05 | 1.28E+05 | NULL | AS | Q8NEA6-2 | GLIS3    |
| 2574.1 | Probable lipid phosphate phosph  | 0.00E+00 | 1.28E+05 | 1.28E+05 | 1.28E+05 | NULL | AS | Q8NBV4   | PPAPDC3  |
| 2079.1 | RNA-binding E3 ubiquitin-protei  | 0.00E+00 | 1.29E+05 | 1.29E+05 | 1.29E+05 | NULL | AS | Q5U5Q3   | MEX3C    |
| 2418.1 | Protein FAM184A                  | 0.00E+00 | 1.29E+05 | 1.29E+05 | 1.29E+05 | NULL | AS | Q8NB25   | FAM184A  |
| 2433.1 | Kelch-like protein 22            | 0.00E+00 | 1.29E+05 | 1.29E+05 | 1.29E+05 | NULL | AS | Q53GT1   | KLHL22   |
| 1464.1 | Phenylalanine-4-hydroxylase      | 0.00E+00 | 1.30E+05 | 1.30E+05 | 1.30E+05 | NULL | AS | P00439   | PAH      |
| 1474.1 | Small nuclear ribonucleoprotein  | 0.00E+00 | 1.30E+05 | 1.30E+05 | 1.30E+05 | NULL | AS | P62318   | SNRPD3   |
| 1538.1 | PHD finger protein 10            | 0.00E+00 | 1.30E+05 | 1.30E+05 | 1.30E+05 | NULL | AS | Q8WUB8   | PHF10    |
| 2796.1 | Microcephalin                    | 0.00E+00 | 1.30E+05 | 1.30E+05 | 1.30E+05 | NULL | AS | Q8NEM0   | MCPH1    |
| 1726.1 | Isoform 3 of FLYWCH-type zinc f  | 0.00E+00 | 1.31E+05 | 1.31E+05 | 1.31E+05 | NULL | AS | Q4VC44-3 | FLYWCH1  |
| 2256.1 | Calcium-transporting ATPase ty   | 0.00E+00 | 1.31E+05 | 1.31E+05 | 1.31E+05 | NULL | AS | E7ES94   | ATP2C2   |
| 2545.1 | Hydroxylysine kinase             | 0.00E+00 | 1.31E+05 | 1.31E+05 | 1.31E+05 | NULL | AS | A2RU49   | AGPHD1   |
| 2601.1 | Dystrophin                       | 0.00E+00 | 1.32E+05 | 1.32E+05 | 1.32E+05 | NULL | AS | P11532   | DMD      |
| 3137.1 | Isoform 4 of DNA topoisomeras    | 0.00E+00 | 1.32E+05 | 1.32E+05 | 1.32E+05 | NULL | AS | P11388-4 | TOP2A    |
| 1118.1 | Lysosomal alpha-glucosidase      | 0.00E+00 | 1.34E+05 | 1.34E+05 | 1.34E+05 | NULL | AS | P10253   | GAA      |
| 1972.1 | Sodium channel protein type 9 s  | 0.00E+00 | 1.34E+05 | 1.34E+05 | 1.34E+05 | NULL | AS | E9PBA5   | SCN9A    |
| 736.1  | RNA-binding protein PNO1         | 0.00E+00 | 1.35E+05 | 1.35E+05 | 1.35E+05 | NULL | AS | Q9NRX1   | PNO1     |
| 1664.1 | Beta-taxilin                     | 0.00E+00 | 1.35E+05 | 1.35E+05 | 1.35E+05 | NULL | AS | Q8N3L3   | TXLNB    |
| 2558.1 | Malcavernin                      | 0.00E+00 | 1.35E+05 | 1.35E+05 | 1.35E+05 | NULL | AS | Q9BSQ5   | CCM2     |
| 2567.1 | Protein FAM133B                  | 0.00E+00 | 1.35E+05 | 1.35E+05 | 1.35E+05 | NULL | AS | Q5BKY9   | FAM133B  |
| 2718.1 | Alpha-(1,6)-fucosyltransferase   | 0.00E+00 | 1.35E+05 | 1.35E+05 | 1.35E+05 | NULL | AS | Q9BYC5   | FUT8     |



|        |                                  |          |          |          |          |      |    |          |           |
|--------|----------------------------------|----------|----------|----------|----------|------|----|----------|-----------|
| 2634.1 | Protein LOC642778                | 0.00E+00 | 1.36E+05 | 1.36E+05 | 1.36E+05 | NULL | AS | E9PJ88   | LOC642778 |
| 1153.1 | Dedicator of cytokinesis protein | 0.00E+00 | 1.37E+05 | 1.37E+05 | 1.37E+05 | NULL | AS | A6NIW2   | DOCK11    |
| 1739.1 | DNA endonuclease RBBP8           | 0.00E+00 | 1.37E+05 | 1.37E+05 | 1.37E+05 | NULL | AS | I6L8A6   | RBBP8     |
| 1938.1 | Catenin beta-1                   | 0.00E+00 | 1.37E+05 | 1.37E+05 | 1.37E+05 | NULL | AS | P35222   | CTNNB1    |
| 2432.1 | Zinc finger protein 398          | 0.00E+00 | 1.37E+05 | 1.37E+05 | 1.37E+05 | NULL | AS | B4DXA9   | ZNF398    |
| 2685.1 | Alpha-mannosidase 2              | 0.00E+00 | 1.37E+05 | 1.37E+05 | 1.37E+05 | NULL | AS | Q16706   | MAN2A1    |
| 3219.1 | Vasohibin-1                      | 0.00E+00 | 1.37E+05 | 1.37E+05 | 1.37E+05 | NULL | AS | G3V4N9   | VASH1     |
| 2948.1 | Protein FAM3D                    | 0.00E+00 | 1.38E+05 | 1.38E+05 | 1.38E+05 | NULL | AS | Q96BQ1   | FAM3D     |
| 1352.1 | Glycine cleavage system H prote  | 0.00E+00 | 1.39E+05 | 1.39E+05 | 1.39E+05 | NULL | AS | P23434   | GCSH      |
| 3066.1 | WD repeat-containing protein K   | 0.00E+00 | 1.39E+05 | 1.39E+05 | 1.39E+05 | NULL | AS | A6NE52   | KIAA1875  |
| 1452.1 | Cystic fibrosis transmembrane c  | 0.00E+00 | 1.40E+05 | 1.40E+05 | 1.40E+05 | NULL | AS | P13569   | CFTR      |
| 2219.1 | ATP-dependent RNA helicase Df    | 0.00E+00 | 1.40E+05 | 1.40E+05 | 1.40E+05 | NULL | AS | Q9NVP1   | DDX18     |
| 2342.1 | Olfactory receptor 1A2           | 0.00E+00 | 1.40E+05 | 1.40E+05 | 1.40E+05 | NULL | AS | Q9Y585   | OR1A2     |
| 1100.1 | Ribonuclease P protein subunit   | 0.00E+00 | 1.40E+05 | 1.40E+05 | 1.40E+05 | NULL | AS | P78346   | RPP30     |
| 945.1  | Zinc finger protein 709          | 0.00E+00 | 1.42E+05 | 1.42E+05 | 1.42E+05 | NULL | AS | Q8N972   | ZNF709    |
| 1492.1 | Isoform 3 of Leucine-rich repeat | 0.00E+00 | 1.42E+05 | 1.42E+05 | 1.42E+05 | NULL | AS | Q8ND23-3 | LRRRC16B  |
| 1209.1 | Isoform 2 of Ubiquitin carboxyl- | 0.00E+00 | 1.44E+05 | 1.44E+05 | 1.44E+05 | NULL | AS | Q14694-2 | USP10     |
| 1344.1 | Pyruvate dehydrogenase E1 con    | 0.00E+00 | 1.44E+05 | 1.44E+05 | 1.44E+05 | NULL | AS | P11177   | PDHB      |
| 2385.1 | Arf-GAP with coiled-coil, ANK re | 0.00E+00 | 1.44E+05 | 1.44E+05 | 1.44E+05 | NULL | AS | Q15027   | ACAP1     |
| 2807.1 | Olfactory receptor 2C3           | 0.00E+00 | 1.44E+05 | 1.44E+05 | 1.44E+05 | NULL | AS | Q8N628   | OR2C3     |
| 1756.1 | Isoform 9 of Multidrug resistanc | 0.00E+00 | 1.45E+05 | 1.45E+05 | 1.45E+05 | NULL | AS | P33527-9 | ABCC1     |
| 2233.1 | Alstrom syndrome protein 1       | 0.00E+00 | 1.45E+05 | 1.45E+05 | 1.45E+05 | NULL | AS | Q8TCU4   | ALMS1     |
| 2320.1 | Isoform 3 of Granulocyte colony  | 0.00E+00 | 1.45E+05 | 1.45E+05 | 1.45E+05 | NULL | AS | Q99062-3 | CSF3R     |
| 2917.1 | Serine/threonine-protein kinase  | 0.00E+00 | 1.45E+05 | 1.45E+05 | 1.45E+05 | NULL | AS | D6RBG5   | NEK1      |
| 2907.1 | Geranylgeranyl transferase type  | 0.00E+00 | 1.46E+05 | 1.46E+05 | 1.46E+05 | NULL | AS | Q92696   | RABGGTA   |
| 1809.1 | NEDD4-binding protein 2          | 0.00E+00 | 1.48E+05 | 1.48E+05 | 1.48E+05 | NULL | AS | Q86UW6   | N4BP2     |
| 1077.1 | ATP-binding cassette sub-family  | 0.00E+00 | 1.49E+05 | 1.49E+05 | 1.49E+05 | NULL | AS | C9JQE6   | ABCA8     |
| 2662.1 | Isoform 2 of Cactin              | 0.00E+00 | 1.49E+05 | 1.49E+05 | 1.49E+05 | NULL | AS | Q8WUQ7-  | CACTIN    |
| 1985.1 | Acid trehalase-like protein 1    | 0.00E+00 | 1.50E+05 | 1.50E+05 | 1.50E+05 | NULL | AS | E7EMA9   | ATHL1     |
| 2194.1 | Olfactory receptor 2M2           | 0.00E+00 | 1.51E+05 | 1.51E+05 | 1.51E+05 | NULL | AS | Q96R28   | OR2M2     |
| 2503.1 | Ryanodine receptor 1             | 0.00E+00 | 1.52E+05 | 1.52E+05 | 1.52E+05 | NULL | AS | P21817   | RYR1      |
| 3218.1 | Meiosis arrest female protein 1  | 0.00E+00 | 1.52E+05 | 1.52E+05 | 1.52E+05 | NULL | AS | Q9Y4F3   | KIAA0430  |
| 854.1  | High mobility group nucleosome   | 0.00E+00 | 1.53E+05 | 1.53E+05 | 1.53E+05 | NULL | AS | O00479   | HMGN4     |
| 1386.1 | Zinc finger protein 622          | 0.00E+00 | 1.53E+05 | 1.53E+05 | 1.53E+05 | NULL | AS | Q969S3   | ZNF622    |
| 1528.1 | Serine incorporator 4            | 0.00E+00 | 1.53E+05 | 1.53E+05 | 1.53E+05 | NULL | AS | A6NM42   | SERINC4   |

|        |                                                             |          |          |          |          |      |    |          |             |
|--------|-------------------------------------------------------------|----------|----------|----------|----------|------|----|----------|-------------|
| 1579.1 | SEC14-like protein 4                                        | 0.00E+00 | 1.53E+05 | 1.53E+05 | 1.53E+05 | NULL | AS | Q9UDX3   | SEC14L4     |
| 2443.1 | RNA-binding protein 20                                      | 0.00E+00 | 1.53E+05 | 1.53E+05 | 1.53E+05 | NULL | AS | Q5T481   | RBM20       |
| 1454.1 | Potassium voltage-gated channel                             | 0.00E+00 | 1.54E+05 | 1.54E+05 | 1.54E+05 | NULL | AS | Q14721   | KCNB1       |
| 1626.1 | Ribosomal RNA processing protein                            | 0.00E+00 | 1.54E+05 | 1.54E+05 | 1.54E+05 | NULL | AS | Q14684   | RRP1B       |
| 2069.1 | Testosterone 17-beta-dehydrogenase                          | 0.00E+00 | 1.54E+05 | 1.54E+05 | 1.54E+05 | NULL | AS | P37058   | HSD17B3     |
| 2570.1 | snRNA-activating protein complex                            | 0.00E+00 | 1.54E+05 | 1.54E+05 | 1.54E+05 | NULL | AS | Q16533   | SNAPC1      |
| 2593.1 | Isoform 2 of Kynurenine/alpha-ketoglutarate 3-monooxygenase | 0.00E+00 | 1.54E+05 | 1.54E+05 | 1.54E+05 | NULL | AS | Q8N5Z0-2 | AADAT       |
| 3161.1 | Retinoblastoma-like protein 2                               | 0.00E+00 | 1.54E+05 | 1.54E+05 | 1.54E+05 | NULL | AS | Q08999   | RBL2        |
| 1196.1 | Isoform 4 of Thiosulfate sulfurtransferase                  | 0.00E+00 | 1.55E+05 | 1.55E+05 | 1.55E+05 | NULL | AS | Q8NFU3-4 | TSTD1       |
| 2297.1 | Interferon-induced guanylate-binding protein 1              | 0.00E+00 | 1.55E+05 | 1.55E+05 | 1.55E+05 | NULL | AS | P32455   | GBP1        |
| 2672.1 | Lipoyltransferase 1, mitochondrial                          | 0.00E+00 | 1.55E+05 | 1.55E+05 | 1.55E+05 | NULL | AS | Q9Y234   | LIPT1       |
| 2321.1 | ATPase, Ca++ transporting, type 4B                          | 0.00E+00 | 1.55E+05 | 1.55E+05 | 1.55E+05 | NULL | AS | P98194   | ATP2C1      |
| 2175.1 | E3 UFM1-protein ligase 1                                    | 0.00E+00 | 1.56E+05 | 1.56E+05 | 1.56E+05 | NULL | AS | O94874   | UFL1        |
| 2439.1 | Glucagon-like peptide 2 receptor                            | 0.00E+00 | 1.56E+05 | 1.56E+05 | 1.56E+05 | NULL | AS | O95838   | GLP2R       |
| 2666.1 | Transcriptional repressor NF-X1                             | 0.00E+00 | 1.56E+05 | 1.56E+05 | 1.56E+05 | NULL | AS | Q12986   | NFX1        |
| 632.1  | CLIP-associating protein 2                                  | 0.00E+00 | 1.57E+05 | 1.57E+05 | 1.57E+05 | NULL | AS | F5H3X0   | CLASP2      |
| 1911.1 | Cystatin-F                                                  | 0.00E+00 | 1.57E+05 | 1.57E+05 | 1.57E+05 | NULL | AS | O76096   | CST7        |
| 1971.1 | REST corepressor 2                                          | 0.00E+00 | 1.57E+05 | 1.57E+05 | 1.57E+05 | NULL | AS | Q8IZ40   | RCOR2       |
| 2293.1 | Isoform 2 of Cytochrome P450 4A14                           | 0.00E+00 | 1.57E+05 | 1.57E+05 | 1.57E+05 | NULL | AS | P13584-2 | CYP4B1      |
| 3115.1 | Arf-GAP with GTPase, ANK repeat domain                      | 0.00E+00 | 1.57E+05 | 1.57E+05 | 1.57E+05 | NULL | AS | E7EUN2   | AGAP1       |
| 2633.1 | Meckel syndrome type 1 protein                              | 0.00E+00 | 1.58E+05 | 1.58E+05 | 1.58E+05 | NULL | AS | Q9NXB0   | MKS1        |
| 1113.1 | Retinoblastoma-like protein 1                               | 0.00E+00 | 1.59E+05 | 1.59E+05 | 1.59E+05 | NULL | AS | P28749   | RBL1        |
| 2926.1 | Glutamate--cysteine ligase regulatory subunit               | 0.00E+00 | 1.60E+05 | 1.60E+05 | 1.60E+05 | NULL | AS | P48507   | GCLM        |
| 3045.1 | DNA polymerase beta                                         | 0.00E+00 | 1.60E+05 | 1.60E+05 | 1.60E+05 | NULL | AS | P06746   | POLB        |
| 1957.1 | Low-density lipoprotein receptor                            | 0.00E+00 | 1.61E+05 | 1.61E+05 | 1.61E+05 | NULL | AS | H0YMD1   | LDLR        |
| 2084.1 | Serine/arginine-rich splicing factor 1                      | 0.00E+00 | 1.61E+05 | 1.61E+05 | 1.61E+05 | NULL | AS | O75494   | SRSF10      |
| 2996.1 | NADH dehydrogenase [ubiquinone] 1, 1-3                      | 0.00E+00 | 1.61E+05 | 1.61E+05 | 1.61E+05 | NULL | AS | O43678   | NDUFA2      |
| 2997.1 | N-terminal kinase-like protein                              | 0.00E+00 | 1.61E+05 | 1.61E+05 | 1.61E+05 | NULL | AS | Q96KG9   | SCYL1       |
| 2055.1 | Retinol dehydrogenase 14                                    | 0.00E+00 | 1.62E+05 | 1.62E+05 | 1.62E+05 | NULL | AS | Q9HBH5   | RDH14       |
| 1707.1 | Isoform 4 of Putative ribosomal protein L16                 | 0.00E+00 | 1.63E+05 | 1.63E+05 | 1.63E+05 | NULL | AS | P46087-4 | NOP2        |
| 1769.1 | DNA-binding protein A                                       | 0.00E+00 | 1.63E+05 | 1.63E+05 | 1.63E+05 | NULL | AS | P16989   | YBX3        |
| 2699.1 | Major vault protein                                         | 0.00E+00 | 1.63E+05 | 1.63E+05 | 1.63E+05 | NULL | AS | Q14764   | MVP         |
| 2262.1 | Homeobox protein goosecoid                                  | 0.00E+00 | 1.64E+05 | 1.64E+05 | 1.64E+05 | NULL | AS | P56915   | GSC         |
| 3041.1 | HCG2008157                                                  | 0.00E+00 | 1.64E+05 | 1.64E+05 | 1.64E+05 | NULL | AS | Q96NP5   | hCG_2008157 |
| 1844.1 | ZNF507 protein                                              | 0.00E+00 | 1.65E+05 | 1.65E+05 | 1.65E+05 | NULL | AS | B9EGE7   | ZNF507      |

|        |                                   |          |          |          |          |      |    |          |           |
|--------|-----------------------------------|----------|----------|----------|----------|------|----|----------|-----------|
| 2170.1 | IQ calmodulin-binding motif-cor   | 0.00E+00 | 1.65E+05 | 1.65E+05 | 1.65E+05 | NULL | AS | Q15051   | IQCB1     |
| 2334.1 | HCG1780554                        | 0.00E+00 | 1.65E+05 | 1.65E+05 | 1.65E+05 | NULL | AS | Q5T4B6   | TMSB4XP4  |
| 1678.1 | Isoform 3 of MAM domain-cont      | 0.00E+00 | 1.66E+05 | 1.66E+05 | 1.66E+05 | NULL | AS | Q7Z553-3 | MDGA2     |
| 1998.1 | Oxysterol-binding protein         | 0.00E+00 | 1.66E+05 | 1.66E+05 | 1.66E+05 | NULL | AS | J3KPA3   | OSBPL9    |
| 2836.1 | Inositol-trisphosphate 3-kinase I | 0.00E+00 | 1.66E+05 | 1.66E+05 | 1.66E+05 | NULL | AS | P27987   | ITPKB     |
| 3203.1 | Protein diaphanous homolog 3      | 0.00E+00 | 1.66E+05 | 1.66E+05 | 1.66E+05 | NULL | AS | Q9NSV4   | DIAPH3    |
| 1564.1 | Carnitine O-palmitoyltransferase  | 0.00E+00 | 1.67E+05 | 1.67E+05 | 1.67E+05 | NULL | AS | P23786   | CPT2      |
| 1954.1 | Phospholipase A-2-activating pr   | 0.00E+00 | 1.67E+05 | 1.67E+05 | 1.67E+05 | NULL | AS | Q9Y263   | PLAA      |
| 2423.1 | Protein FAM71A                    | 0.00E+00 | 1.68E+05 | 1.68E+05 | 1.68E+05 | NULL | AS | Q8IYT1   | FAM71A    |
| 1117.1 | DnaJ homolog subfamily B mem      | 0.00E+00 | 1.69E+05 | 1.69E+05 | 1.69E+05 | NULL | AS | P25685   | DNAJB1    |
| 1508.1 | DnaJ homolog subfamily C mem      | 0.00E+00 | 1.69E+05 | 1.69E+05 | 1.69E+05 | NULL | AS | Q13217   | DNAJC3    |
| 1704.1 | Isoform 7 of Ras-specific guanin  | 0.00E+00 | 1.69E+05 | 1.69E+05 | 1.69E+05 | NULL | AS | Q5JS13-7 | RALGPS1   |
| 1328.1 | Extracellular matrix protein FRA  | 0.00E+00 | 1.69E+05 | 1.69E+05 | 1.69E+05 | NULL | AS | Q86XX4   | FRAS1     |
| 2490.1 | Cell division cycle-associated pr | 0.00E+00 | 1.70E+05 | 1.70E+05 | 1.70E+05 | NULL | AS | Q99618   | CDCA3     |
| 2483.1 | Isoform 6 of Tyrosine-protein pf  | 0.00E+00 | 1.71E+05 | 1.71E+05 | 1.71E+05 | NULL | AS | Q4JDL3-6 | PTPN20A   |
| 1243.1 | Isoform 2 of Merlin               | 0.00E+00 | 1.72E+05 | 1.72E+05 | 1.72E+05 | NULL | AS | P35240-2 | NF2       |
| 1868.1 | GRAM domain-containing prote      | 0.00E+00 | 1.72E+05 | 1.72E+05 | 1.72E+05 | NULL | AS | Q8IYS0   | GRAMD1C   |
| 1244.1 | Phosphorylase b kinase regulatc   | 0.00E+00 | 1.73E+05 | 1.73E+05 | 1.73E+05 | NULL | AS | P46019   | PHKA2     |
| 1392.1 | Carboxypeptidase E                | 0.00E+00 | 1.74E+05 | 1.74E+05 | 1.74E+05 | NULL | AS | P16870   | CPE       |
| 799.1  | L-xylulose reductase              | 0.00E+00 | 1.75E+05 | 1.75E+05 | 1.75E+05 | NULL | AS | Q7Z4W1   | DCXR      |
| 1882.1 | REST corepressor 3                | 0.00E+00 | 1.76E+05 | 1.76E+05 | 1.76E+05 | NULL | AS | B4DV59   | RCOR3     |
| 2204.1 | 28S ribosomal protein S18b, mit   | 0.00E+00 | 1.76E+05 | 1.76E+05 | 1.76E+05 | NULL | AS | Q9Y676   | MRPS18B   |
| 2683.1 | WD repeat-containing protein 2    | 0.00E+00 | 1.76E+05 | 1.76E+05 | 1.76E+05 | NULL | AS | Q64LD2   | WDR25     |
| 657.1  | Isoform 4 of PCI domain-contair   | 0.00E+00 | 1.77E+05 | 1.77E+05 | 1.77E+05 | NULL | AS | Q5JVF3-4 | PCID2     |
| 2536.1 | Prefoldin subunit 4               | 0.00E+00 | 1.79E+05 | 1.79E+05 | 1.79E+05 | NULL | AS | E9PQY2   | PFDN4     |
| 1561.1 | Pregnancy zone protein            | 0.00E+00 | 1.80E+05 | 1.80E+05 | 1.80E+05 | NULL | AS | P20742   | PZP       |
| 2720.1 | Syntaxin-4                        | 0.00E+00 | 1.80E+05 | 1.80E+05 | 1.80E+05 | NULL | AS | Q12846   | STX4      |
| 1109.1 | Receptor-type tyrosine-protein    | 0.00E+00 | 1.81E+05 | 1.81E+05 | 1.81E+05 | NULL | AS | Q15256   | PTPRR     |
| 2936.1 | ATP-binding cassette sub-family   | 0.00E+00 | 1.81E+05 | 1.81E+05 | 1.81E+05 | NULL | AS | E7ETD3   | ABCA5     |
| 2444.1 | ADAMTS-like 2                     | 0.00E+00 | 1.82E+05 | 1.82E+05 | 1.82E+05 | NULL | AS | B1B0D4   | ADAMTSL2  |
| 1682.1 | Leucine-rich repeat-containing p  | 0.00E+00 | 1.84E+05 | 1.84E+05 | 1.84E+05 | NULL | AS | Q8IWT6   | LRRRC8A   |
| 1846.1 | Protein EFR3 homolog B            | 0.00E+00 | 1.84E+05 | 1.84E+05 | 1.84E+05 | NULL | AS | Q9Y2G0   | EFR3B     |
| 2068.1 | Liprin-alpha-3                    | 0.00E+00 | 1.84E+05 | 1.84E+05 | 1.84E+05 | NULL | AS | O75145   | PPFIA3    |
| 674.1  | Protein NipSnap homolog 3A        | 0.00E+00 | 1.85E+05 | 1.85E+05 | 1.85E+05 | NULL | AS | Q9UJFN0  | NIPSNAP3A |
| 3172.1 | Isoform 5 of Serine/threonine-p   | 0.00E+00 | 1.85E+05 | 1.85E+05 | 1.85E+05 | NULL | AS | Q8IWQ3-5 | BRSK2     |

|        |                                   |          |          |          |          |      |    |           |          |
|--------|-----------------------------------|----------|----------|----------|----------|------|----|-----------|----------|
| 1505.1 | Cyclin-dependent kinase 5         | 0.00E+00 | 1.86E+05 | 1.86E+05 | 1.86E+05 | NULL | AS | Q00535    | CDK5     |
| 2604.1 | GC-rich sequence DNA-binding f    | 0.00E+00 | 1.86E+05 | 1.86E+05 | 1.86E+05 | NULL | AS | P16383    | GCFC2    |
| 2031.1 | Isocitrate dehydrogenase [NAD]    | 0.00E+00 | 1.87E+05 | 1.87E+05 | 1.87E+05 | NULL | AS | P50213    | IDH3A    |
| 2589.1 | Zinc finger matrin-type protein : | 0.00E+00 | 1.87E+05 | 1.87E+05 | 1.87E+05 | NULL | AS | Q5H9K5    | ZMAT1    |
| 2945.1 | Isoform 2 of SWI/SNF-related m    | 0.00E+00 | 1.87E+05 | 1.87E+05 | 1.87E+05 | NULL | AS | Q9H4L7-2  | SMARCAD1 |
| 1322.1 | Elongator complex protein 3       | 0.00E+00 | 1.88E+05 | 1.88E+05 | 1.88E+05 | NULL | AS | Q9H9T3    | ELP3     |
| 1406.1 | A disintegrin and metalloprotein  | 0.00E+00 | 1.90E+05 | 1.90E+05 | 1.90E+05 | NULL | AS | O75173    | ADAMTS4  |
| 3052.1 | Zinc finger protein 672           | 0.00E+00 | 1.90E+05 | 1.90E+05 | 1.90E+05 | NULL | AS | Q499Z4    | ZNF672   |
| 2143.1 | Isoform 3 of Polypyrimidine trac  | 0.00E+00 | 1.91E+05 | 1.91E+05 | 1.91E+05 | NULL | AS | P26599-3  | PTBP1    |
| 2902.1 | RCC1 domain-containing protein    | 0.00E+00 | 1.91E+05 | 1.91E+05 | 1.91E+05 | NULL | AS | A6NED2    | RCCD1    |
| 1396.1 | Fanconi anemia group M protein    | 0.00E+00 | 1.92E+05 | 1.92E+05 | 1.92E+05 | NULL | AS | Q8IYD8    | FANCM    |
| 1566.1 | E3 SUMO-protein ligase CBX4       | 0.00E+00 | 1.94E+05 | 1.94E+05 | 1.94E+05 | NULL | AS | O00257    | CBX4     |
| 2607.1 | Isoform 3 of Trinucleotide repea  | 0.00E+00 | 1.96E+05 | 1.96E+05 | 1.96E+05 | NULL | AS | Q8NDV7-3  | TNRC6A   |
| 3151.1 | Spindle and kinetochore-associ    | 0.00E+00 | 1.96E+05 | 1.96E+05 | 1.96E+05 | NULL | AS | Q8IX90    | SKA3     |
| 767.1  | Ribosome-binding protein 1        | 0.00E+00 | 1.97E+05 | 1.97E+05 | 1.97E+05 | NULL | AS | Q9P2E9    | RRBP1    |
| 1951.1 | Ig-like V-type domain-containin   | 0.00E+00 | 1.97E+05 | 1.97E+05 | 1.97E+05 | NULL | AS | A6NFU0    | FAM187A  |
| 2021.1 | Calcyphosin-2                     | 0.00E+00 | 1.97E+05 | 1.97E+05 | 1.97E+05 | NULL | AS | B9A061    | CAPS2    |
| 2569.1 | Isoform 13 of Dysferlin           | 0.00E+00 | 1.97E+05 | 1.97E+05 | 1.97E+05 | NULL | AS | O75923-13 | DYSF     |
| 1205.1 | COP9 signalosome complex sub      | 0.00E+00 | 1.99E+05 | 1.99E+05 | 1.99E+05 | NULL | AS | Q7L5N1    | COPS6    |
| 1800.1 | Growth factor receptor-bound r    | 0.00E+00 | 1.99E+05 | 1.99E+05 | 1.99E+05 | NULL | AS | Q13322    | GRB10    |
| 1066.1 | Cyclin-I                          | 0.00E+00 | 2.00E+05 | 2.00E+05 | 2.00E+05 | NULL | AS | Q14094    | CCNI     |
| 1832.1 | NADH dehydrogenase (ubiquinc      | 0.00E+00 | 2.00E+05 | 2.00E+05 | 2.00E+05 | NULL | AS | B4DW83    | NDUFAF6  |
| 3058.1 | Isoform 7 of Histone deacetylasi  | 0.00E+00 | 2.00E+05 | 2.00E+05 | 2.00E+05 | NULL | AS | Q9UKV0-7  | HDAC9    |
| 2063.1 | Mitochondrial calcium uniporter   | 0.00E+00 | 2.01E+05 | 2.01E+05 | 2.01E+05 | NULL | AS | Q96AQ8    | MCUR1    |
| 3121.1 | GTPase IMAP family member 6       | 0.00E+00 | 2.01E+05 | 2.01E+05 | 2.01E+05 | NULL | AS | Q6P9H5    | GIMAP6   |
| 2088.1 | Sterile alpha motif domain-cont   | 0.00E+00 | 2.02E+05 | 2.02E+05 | 2.02E+05 | NULL | AS | Q8IVG5    | SAMD9L   |
| 2197.1 | Putative short-chain dehydroge    | 0.00E+00 | 2.02E+05 | 2.02E+05 | 2.02E+05 | NULL | AS | A6NKP2    | SDR42E2  |
| 2715.1 | POU domain, class 4, transcripti  | 0.00E+00 | 2.02E+05 | 2.02E+05 | 2.02E+05 | NULL | AS | Q01851    | POU4F1   |
| 3026.1 | Tripartite motif-containing prot  | 0.00E+00 | 2.03E+05 | 2.03E+05 | 2.03E+05 | NULL | AS | Q14142    | TRIM14   |
| 847.1  | Lupus La protein                  | 0.00E+00 | 2.04E+05 | 2.04E+05 | 2.04E+05 | NULL | AS | P05455    | SSB      |
| 1017.1 | 39S ribosomal protein L37, mito   | 0.00E+00 | 2.04E+05 | 2.04E+05 | 2.04E+05 | NULL | AS | Q9BZE1    | MRPL37   |
| 2891.1 | Lysosomal alpha-mannosidase       | 0.00E+00 | 2.04E+05 | 2.04E+05 | 2.04E+05 | NULL | AS | O00754    | MAN2B1   |
| 1183.1 | Forkhead box protein C2           | 0.00E+00 | 2.05E+05 | 2.05E+05 | 2.05E+05 | NULL | AS | Q99958    | FOXC2    |
| 1597.1 | Transcription elongation factor : | 0.00E+00 | 2.05E+05 | 2.05E+05 | 2.05E+05 | NULL | AS | Q7KZ85    | SUPT6H   |
| 2927.1 | Isoform 4 of RNA-binding protei   | 0.00E+00 | 2.06E+05 | 2.06E+05 | 2.06E+05 | NULL | AS | P49756-4  | RBM25    |

|        |                                    |          |          |          |          |      |    |        |              |
|--------|------------------------------------|----------|----------|----------|----------|------|----|--------|--------------|
| 1956.1 | Neural cell expressed, developr    | 0.00E+00 | 2.07E+05 | 2.07E+05 | 2.07E+05 | NULL | AS | G3V3F1 | NEDD1        |
| 2564.1 | SH3 and multiple ankyrin repeat    | 0.00E+00 | 2.07E+05 | 2.07E+05 | 2.07E+05 | NULL | AS | A6NHU9 | SHANK2       |
| 1336.1 | Golgin subfamily B member 1        | 0.00E+00 | 2.08E+05 | 2.08E+05 | 2.08E+05 | NULL | AS | Q14789 | GOLGB1       |
| 1167.1 | TP53-regulating kinase             | 0.00E+00 | 2.09E+05 | 2.09E+05 | 2.09E+05 | NULL | AS | Q96S44 | TP53RK       |
| 3072.1 | TATA-binding protein-associated    | 0.00E+00 | 2.09E+05 | 2.09E+05 | 2.09E+05 | NULL | AS | O14981 | BTA1F1       |
| 1374.1 | Protein monoglycylase TTLL8        | 0.00E+00 | 2.10E+05 | 2.10E+05 | 2.10E+05 | NULL | AS | A6PVC2 | TTLL8        |
| 2686.1 | Inactive N-acetylated-alpha-link   | 0.00E+00 | 2.10E+05 | 2.10E+05 | 2.10E+05 | NULL | AS | Q58DX5 | NAALADL2     |
| 2875.1 | Alpha-N-acetylgalactosaminide      | 0.00E+00 | 2.11E+05 | 2.11E+05 | 2.11E+05 | NULL | AS | Q9NSC7 | ST6GALNAC1   |
| 1052.1 | HESB like domain containing 2, i   | 0.00E+00 | 2.12E+05 | 2.12E+05 | 2.12E+05 | NULL | AS | B4DJI5 | ISCA1        |
| 2492.1 | Myosin light chain kinase 3        | 0.00E+00 | 2.12E+05 | 2.12E+05 | 2.12E+05 | NULL | AS | Q32MK0 | MYLK3        |
| 2470.1 | Rho GTPase-activating protein 6    | 0.00E+00 | 2.14E+05 | 2.14E+05 | 2.14E+05 | NULL | AS | O43182 | ARHGAP6      |
| 3163.1 | Putative FAM120A opposite str      | 0.00E+00 | 2.14E+05 | 2.14E+05 | 2.14E+05 | NULL | AS | Q5T036 | FAM120AOS    |
| 1514.1 | Butyrophilin subfamily 3 memb      | 0.00E+00 | 2.16E+05 | 2.16E+05 | 2.16E+05 | NULL | AS | O00478 | BTN3A3       |
| 813.1  | Serine/arginine-rich splicing fact | 0.00E+00 | 2.18E+05 | 2.18E+05 | 2.18E+05 | NULL | AS | Q16629 | SRSF7        |
| 2549.1 | Cannabinoid receptor 2             | 0.00E+00 | 2.18E+05 | 2.18E+05 | 2.18E+05 | NULL | AS | P34972 | CNR2         |
| 1748.1 | Nucleolar complex protein 4 ho     | 0.00E+00 | 2.19E+05 | 2.19E+05 | 2.19E+05 | NULL | AS | Q9BVI4 | NOC4L        |
| 1804.1 | tRNA selenocysteine 1-associat     | 0.00E+00 | 2.19E+05 | 2.19E+05 | 2.19E+05 | NULL | AS | Q9NX07 | TRNAU1AP     |
| 684.1  | Protein ABHD14A-ACY1               | 0.00E+00 | 2.21E+05 | 2.21E+05 | 2.21E+05 | NULL | AS | C9JMV9 | ABHD14A-ACY1 |
| 737.1  | Kinesin-associated protein 3       | 0.00E+00 | 2.21E+05 | 2.21E+05 | 2.21E+05 | NULL | AS | Q92845 | KIFAP3       |
| 1101.1 | Isoform 6 of Spermine oxidase      | 0.00E+00 | 2.21E+05 | 2.21E+05 | 2.21E+05 | NULL | AS | Q9NWM0 | SMOX         |
| 2247.1 | Centriolin                         | 0.00E+00 | 2.21E+05 | 2.21E+05 | 2.21E+05 | NULL | AS | Q7Z7A1 | CNTRL        |
| 3099.1 | Zinc finger protein 425            | 0.00E+00 | 2.21E+05 | 2.21E+05 | 2.21E+05 | NULL | AS | Q6IV72 | ZNF425       |
| 8.4    | Heat shock 70 kDa protein 1A/1     | 0.00E+00 | 2.23E+05 | 2.23E+05 | 2.23E+05 | NULL | AS | E7EP94 | HSPA1A       |
| 648.1  | N-alpha-acetyltransferase 10       | 0.00E+00 | 2.23E+05 | 2.23E+05 | 2.23E+05 | NULL | AS | P41227 | NAA10        |
| 814.1  | Muscleblind-like protein 1         | 0.00E+00 | 2.23E+05 | 2.23E+05 | 2.23E+05 | NULL | AS | Q9NR56 | MBNL1        |
| 2448.1 | Enhancer of rudimentary homol      | 0.00E+00 | 2.24E+05 | 2.24E+05 | 2.24E+05 | NULL | AS | P84090 | ERH          |
| 2393.1 | SH3 and PX domain-containing p     | 0.00E+00 | 2.28E+05 | 2.28E+05 | 2.28E+05 | NULL | AS | Q5TCZ1 | SH3PXD2A     |
| 3171.1 | Plexin-D1                          | 0.00E+00 | 2.28E+05 | 2.28E+05 | 2.28E+05 | NULL | AS | Q9Y4D7 | PLXND1       |
| 3226.1 | Matrix metalloproteinase-20        | 0.00E+00 | 2.28E+05 | 2.28E+05 | 2.28E+05 | NULL | AS | O60882 | MMP20        |
| 1006.1 | Nucleolar protein 58               | 0.00E+00 | 2.29E+05 | 2.29E+05 | 2.29E+05 | NULL | AS | Q9Y2X3 | NOP58        |
| 1468.1 | Mitogen-activated protein kinas    | 0.00E+00 | 2.29E+05 | 2.29E+05 | 2.29E+05 | NULL | AS | Q8IVH8 | MAP4K3       |
| 2294.1 | Ribonuclease H2 subunit C          | 0.00E+00 | 2.29E+05 | 2.29E+05 | 2.29E+05 | NULL | AS | E9PN81 | RNASEH2C     |
| 1604.1 | ATP-dependent RNA helicase Df      | 0.00E+00 | 2.30E+05 | 2.30E+05 | 2.30E+05 | NULL | AS | Q14562 | DHX8         |
| 1887.1 | Dynein heavy chain domain-con      | 0.00E+00 | 2.30E+05 | 2.30E+05 | 2.30E+05 | NULL | AS | Q96M86 | DNHD1        |
| 2030.1 | Surfeit 4, isoform CRA_c           | 0.00E+00 | 2.30E+05 | 2.30E+05 | 2.30E+05 | NULL | AS | B7Z6A4 | SURF4        |

|        |                                    |          |          |          |          |      |    |          |          |
|--------|------------------------------------|----------|----------|----------|----------|------|----|----------|----------|
| 2137.1 | RNA-binding protein 5              | 0.00E+00 | 2.30E+05 | 2.30E+05 | 2.30E+05 | NULL | AS | P52756   | RBM5     |
| 563.1  | Nuclear inhibitor of protein pho   | 0.00E+00 | 2.31E+05 | 2.31E+05 | 2.31E+05 | NULL | AS | Q12972   | PPP1R8   |
| 1627.1 | Protein FAM188B2                   | 0.00E+00 | 2.33E+05 | 2.33E+05 | 2.33E+05 | NULL | AS | A8MYZ0   | FAM188B2 |
| 1512.1 | Headcase protein homolog           | 0.00E+00 | 2.34E+05 | 2.34E+05 | 2.34E+05 | NULL | AS | Q9UBI9   | HECA     |
| 2273.1 | M-phase phosphoprotein 9           | 0.00E+00 | 2.34E+05 | 2.34E+05 | 2.34E+05 | NULL | AS | Q99550   | MPHOSPH9 |
| 2077.1 | Centrosomal protein of 290 kDa     | 0.00E+00 | 2.35E+05 | 2.35E+05 | 2.35E+05 | NULL | AS | J3KNF5   | CEP290   |
| 2195.1 | Kinesin-like protein KIF12         | 0.00E+00 | 2.35E+05 | 2.35E+05 | 2.35E+05 | NULL | AS | Q96FN5   | KIF12    |
| 2511.1 | E3 ubiquitin-protein ligase pellir | 0.00E+00 | 2.35E+05 | 2.35E+05 | 2.35E+05 | NULL | AS | Q96FA3   | PELI1    |
| 1018.1 | Dpy-30-like protein, isoform CR    | 0.00E+00 | 2.36E+05 | 2.36E+05 | 2.36E+05 | NULL | AS | B4DIS3   | LOC84661 |
| 1510.1 | Ataxin-2                           | 0.00E+00 | 2.36E+05 | 2.36E+05 | 2.36E+05 | NULL | AS | Q99700   | ATXN2    |
| 2999.1 | Isoform 4 of Ankyrin repeat and    | 0.00E+00 | 2.36E+05 | 2.36E+05 | 2.36E+05 | NULL | AS | Q9P2R3-4 | ANKFY1   |
| 2403.1 | Rho GTPase-activating protein 2    | 0.00E+00 | 2.37E+05 | 2.37E+05 | 2.37E+05 | NULL | AS | Q5T5U3   | ARHGAP21 |
| 595.1  | Phosphatidylinositol-binding cla   | 0.00E+00 | 2.39E+05 | 2.39E+05 | 2.39E+05 | NULL | AS | Q13492   | PICALM   |
| 802.1  | Lactotransferrin                   | 0.00E+00 | 2.39E+05 | 2.39E+05 | 2.39E+05 | NULL | AS | P02788   | LTF      |
| 2965.1 | Pecanex-like protein 1             | 0.00E+00 | 2.39E+05 | 2.39E+05 | 2.39E+05 | NULL | AS | Q96RV3   | PCNX     |
| 1371.1 | WD repeat-containing and plan      | 0.00E+00 | 2.41E+05 | 2.41E+05 | 2.41E+05 | NULL | AS | O95876   | WDPCP    |
| 2258.1 | Ribonuclease P protein subunit     | 0.00E+00 | 2.41E+05 | 2.41E+05 | 2.41E+05 | NULL | AS | Q8N5L8   | RPP25L   |
| 2694.1 | Transient receptor potential cat   | 0.00E+00 | 2.42E+05 | 2.42E+05 | 2.42E+05 | NULL | AS | E9PGK7   | TRPM2    |
| 3267.1 | GPI transamidase component PI      | 0.00E+00 | 2.42E+05 | 2.42E+05 | 2.42E+05 | NULL | AS | Q969N2   | PIGT     |
| 1042.1 | Ribosome-releasing factor 2, mi    | 0.00E+00 | 2.43E+05 | 2.43E+05 | 2.43E+05 | NULL | AS | Q969S9   | GFM2     |
| 2769.1 | Isoform 3 of Ran-binding protei    | 0.00E+00 | 2.43E+05 | 2.43E+05 | 2.43E+05 | NULL | AS | Q86VV4-3 | RANBP3L  |
| 1592.1 | Isoform 3 of Acyl-coenzyme A sy    | 0.00E+00 | 2.44E+05 | 2.44E+05 | 2.44E+05 | NULL | AS | Q6P461-3 | ACSM6    |
| 1435.1 | 60S ribosomal protein L18a         | 0.00E+00 | 2.45E+05 | 2.45E+05 | 2.45E+05 | NULL | AS | Q02543   | RPL18A   |
| 2003.1 | Disabled homolog 1                 | 0.00E+00 | 2.45E+05 | 2.45E+05 | 2.45E+05 | NULL | AS | O75553   | DAB1     |
| 3103.1 | Unconventional myosin-IXa          | 0.00E+00 | 2.45E+05 | 2.45E+05 | 2.45E+05 | NULL | AS | H3BMM1   | MYO9A    |
| 420.2  | Long-chain-fatty-acid--CoA ligas   | 0.00E+00 | 2.46E+05 | 2.46E+05 | 2.46E+05 | NULL | AS | D6RER0   | ACSL1    |
| 2539.1 | ADP-ribose pyrophosphatase, m      | 0.00E+00 | 2.46E+05 | 2.46E+05 | 2.46E+05 | NULL | AS | Q9BW91   | NUDT9    |
| 3051.1 | Collagen alpha-1(VIII) chain       | 0.00E+00 | 2.47E+05 | 2.47E+05 | 2.47E+05 | NULL | AS | P27658   | COL8A1   |
| 3007.1 | Signal transducer and activator    | 0.00E+00 | 2.48E+05 | 2.48E+05 | 2.48E+05 | NULL | AS | P52630   | STAT2    |
| 3229.1 | Tetratricopeptide repeat protei    | 0.00E+00 | 2.50E+05 | 2.50E+05 | 2.50E+05 | NULL | AS | Q8N584   | TTC39C   |
| 2078.1 | LIM/homeobox protein Lhx4          | 0.00E+00 | 2.51E+05 | 2.51E+05 | 2.51E+05 | NULL | AS | Q969G2   | LHX4     |
| 2453.1 | Coenzyme Q-binding protein CC      | 0.00E+00 | 2.51E+05 | 2.51E+05 | 2.51E+05 | NULL | AS | Q96MF6   | COQ10A   |
| 781.1  | Isoform 2 of Zinc finger and SCA   | 0.00E+00 | 2.52E+05 | 2.52E+05 | 2.52E+05 | NULL | AS | Q8TBC5-2 | ZSCAN18  |
| 2231.1 | Protein GDF5OS, mitochondrial      | 0.00E+00 | 2.52E+05 | 2.52E+05 | 2.52E+05 | NULL | AS | Q5U4N7   | GDF5OS   |
| 2340.1 | Isoform L' of Protein patched hc   | 0.00E+00 | 2.52E+05 | 2.52E+05 | 2.52E+05 | NULL | AS | Q13635-2 | PTCH1    |

|        |                                   |          |          |          |          |      |    |          |         |
|--------|-----------------------------------|----------|----------|----------|----------|------|----|----------|---------|
| 940.1  | Calcium homeostasis endoplasm     | 0.00E+00 | 2.53E+05 | 2.53E+05 | 2.53E+05 | NULL | AS | J3QK89   | CHERP   |
| 1115.1 | 1-phosphatidylinositol 4,5-bisph  | 0.00E+00 | 2.53E+05 | 2.53E+05 | 2.53E+05 | NULL | AS | Q9P212   | PLCE1   |
| 1240.1 | FERM domain-containing protei     | 0.00E+00 | 2.53E+05 | 2.53E+05 | 2.53E+05 | NULL | AS | A2A2Y4   | FRMD3   |
| 1274.1 | Isoform 4 of Sterol regulatory el | 0.00E+00 | 2.53E+05 | 2.53E+05 | 2.53E+05 | NULL | AS | P36956-4 | SREBF1  |
| 1983.1 | Melanoma-associated antigen E     | 0.00E+00 | 2.53E+05 | 2.53E+05 | 2.53E+05 | NULL | AS | Q9HCI5   | MAGEE1  |
| 2228.1 | DNA-directed RNA polymerase I     | 0.00E+00 | 2.53E+05 | 2.53E+05 | 2.53E+05 | NULL | AS | P05423   | POLR3D  |
| 2230.1 | Beta-nerve growth factor          | 0.00E+00 | 2.53E+05 | 2.53E+05 | 2.53E+05 | NULL | AS | P01138   | NGF     |
| 1310.1 | Insulin-like growth factor 2 mRN  | 0.00E+00 | 2.54E+05 | 2.54E+05 | 2.54E+05 | NULL | AS | F8W930   | IGF2BP2 |
| 1779.1 | Contactin-2                       | 0.00E+00 | 2.54E+05 | 2.54E+05 | 2.54E+05 | NULL | AS | Q02246   | CNTN2   |
| 140.2  | Rab GDP dissociation inhibitor a  | 0.00E+00 | 2.55E+05 | 2.55E+05 | 2.55E+05 | NULL | AS | P31150   | GDI1    |
| 1577.1 | Neuroigin-2                       | 0.00E+00 | 2.55E+05 | 2.55E+05 | 2.55E+05 | NULL | AS | Q8NFZ4   | NLGN2   |
| 2544.1 | Interleukin-12 receptor subunit   | 0.00E+00 | 2.55E+05 | 2.55E+05 | 2.55E+05 | NULL | AS | Q99665   | IL12RB2 |
| 3010.1 | Cyclin-dependent kinase-like 4    | 0.00E+00 | 2.55E+05 | 2.55E+05 | 2.55E+05 | NULL | AS | Q2NME9   | CDKL4   |
| 2774.1 | Nucleolar GTP-binding protein 1   | 0.00E+00 | 2.56E+05 | 2.56E+05 | 2.56E+05 | NULL | AS | Q9BZE4   | GTPBP4  |
| 758.1  | Myelin expression factor 2        | 0.00E+00 | 2.57E+05 | 2.57E+05 | 2.57E+05 | NULL | AS | Q9P2K5   | MYEF2   |
| 806.1  | Nuclear pore complex protein N    | 0.00E+00 | 2.57E+05 | 2.57E+05 | 2.57E+05 | NULL | AS | P57740   | NUP107  |
| 1630.1 | Beta-crystallin B2                | 0.00E+00 | 2.57E+05 | 2.57E+05 | 2.57E+05 | NULL | AS | P43320   | CRYBB2  |
| 1266.1 | Unconventional myosin-Vc          | 0.00E+00 | 2.58E+05 | 2.58E+05 | 2.58E+05 | NULL | AS | Q9NQX4   | MYO5C   |
| 3082.1 | Proprotein convertase subtilisin  | 0.00E+00 | 2.58E+05 | 2.58E+05 | 2.58E+05 | NULL | AS | Q8NBP7   | PCSK9   |
| 3032.1 | Putative olfactory receptor 4A8   | 0.00E+00 | 2.60E+05 | 2.60E+05 | 2.60E+05 | NULL | AS | P0C604   | OR4A8P  |
| 3144.1 | Multidrug resistance protein 3    | 0.00E+00 | 2.60E+05 | 2.60E+05 | 2.60E+05 | NULL | AS | P21439   | ABCB4   |
| 1866.1 | Protein spire homolog 2           | 0.00E+00 | 2.62E+05 | 2.62E+05 | 2.62E+05 | NULL | AS | Q8WWL2   | SPIRE2  |
| 3029.1 | BAH and coiled-coil domain-con    | 0.00E+00 | 2.62E+05 | 2.62E+05 | 2.62E+05 | NULL | AS | F8WBW8   | BAHCC1  |
| 901.1  | ADP-ribosylation factor-like prot | 0.00E+00 | 2.64E+05 | 2.64E+05 | 2.64E+05 | NULL | AS | Q96BM9   | ARL8A   |
| 1184.1 | Dipeptidyl peptidase 2            | 0.00E+00 | 2.64E+05 | 2.64E+05 | 2.64E+05 | NULL | AS | Q9UHL4   | DPP7    |
| 1999.1 | DmX-like protein 1                | 0.00E+00 | 2.65E+05 | 2.65E+05 | 2.65E+05 | NULL | AS | F5H269   | DMXL1   |
| 2621.1 | Isoform 2 of Neuronal tyrosine-j  | 0.00E+00 | 2.66E+05 | 2.66E+05 | 2.66E+05 | NULL | AS | Q6ZVC0-2 | NYAP1   |
| 2913.1 | ATP-binding cassette sub-family   | 0.00E+00 | 2.66E+05 | 2.66E+05 | 2.66E+05 | NULL | AS | Q86UK0   | ABCA12  |
| 2116.1 | Isoform MOP3 of Aryl hydrocart    | 0.00E+00 | 2.67E+05 | 2.67E+05 | 2.67E+05 | NULL | AS | O00327-7 | ARNTL   |
| 3233.1 | Clarin-2                          | 0.00E+00 | 2.68E+05 | 2.68E+05 | 2.68E+05 | NULL | AS | A0PK11   | CLRN2   |
| 2632.1 | Disheveled-associated activator   | 0.00E+00 | 2.71E+05 | 2.71E+05 | 2.71E+05 | NULL | AS | Q9Y4D1   | DAAM1   |
| 3059.1 | Isoform 4 of Tensin-like C1 dom   | 0.00E+00 | 2.71E+05 | 2.71E+05 | 2.71E+05 | NULL | AS | Q63HR2-4 | TENC1   |
| 3213.1 | Collagen alpha-1(XXV) chain       | 0.00E+00 | 2.71E+05 | 2.71E+05 | 2.71E+05 | NULL | AS | Q9BXS0   | COL25A1 |
| 2181.1 | Leucine-rich repeat and fibroner  | 0.00E+00 | 2.72E+05 | 2.72E+05 | 2.72E+05 | NULL | AS | Q9ULH4   | LRFN2   |
| 3148.1 | RNA-binding protein 28            | 0.00E+00 | 2.72E+05 | 2.72E+05 | 2.72E+05 | NULL | AS | Q9NW13   | RBM28   |

|        |                                    |          |          |          |          |      |    |          |          |
|--------|------------------------------------|----------|----------|----------|----------|------|----|----------|----------|
| 1150.1 | Mannosyl-oligosaccharide 1,2-a     | 0.00E+00 | 2.73E+05 | 2.73E+05 | 2.73E+05 | NULL | AS | P33908   | MAN1A1   |
| 2087.1 | Prolyl 4-hydroxylase subunit alp   | 0.00E+00 | 2.73E+05 | 2.73E+05 | 2.73E+05 | NULL | AS | P13674   | P4HA1    |
| 549.1  | Isoform 2 of Catenin alpha-1       | 0.00E+00 | 2.74E+05 | 2.74E+05 | 2.74E+05 | NULL | AS | P35221-2 | CTNNA1   |
| 2323.1 | Cell division cycle protein 123 h  | 0.00E+00 | 2.74E+05 | 2.74E+05 | 2.74E+05 | NULL | AS | O75794   | CDC123   |
| 1376.1 | Chromosome transmission fidel      | 0.00E+00 | 2.75E+05 | 2.75E+05 | 2.75E+05 | NULL | AS | E7EXA6   | CHTF18   |
| 1221.1 | Centromere/kinetochore protei      | 0.00E+00 | 2.77E+05 | 2.77E+05 | 2.77E+05 | NULL | AS | O43264   | ZW10     |
| 2186.1 | Fibronectin type III domain-cont   | 0.00E+00 | 2.78E+05 | 2.78E+05 | 2.78E+05 | NULL | AS | Q53EP0   | FNDC3B   |
| 2657.1 | Isoform 2 of Testis-expressed se   | 0.00E+00 | 2.79E+05 | 2.79E+05 | 2.79E+05 | NULL | AS | Q8IWB9-2 | TEX2     |
| 2222.1 | Zinc finger protein 700            | 0.00E+00 | 2.80E+05 | 2.80E+05 | 2.80E+05 | NULL | AS | Q9H0M5   | ZNF700   |
| 2413.1 | Zinc finger protein 664            | 0.00E+00 | 2.80E+05 | 2.80E+05 | 2.80E+05 | NULL | AS | Q8N3J9   | ZNF664   |
| 1258.1 | Serine-rich coiled-coil domain-ci  | 0.00E+00 | 2.81E+05 | 2.81E+05 | 2.81E+05 | NULL | AS | Q9C0I3   | CCSER1   |
| 1988.1 | Small nuclear ribonucleoprotein    | 0.00E+00 | 2.81E+05 | 2.81E+05 | 2.81E+05 | NULL | AS | P62304   | SNRPE    |
| 2415.1 | MICAL-like protein 1               | 0.00E+00 | 2.82E+05 | 2.82E+05 | 2.82E+05 | NULL | AS | Q8N3F8   | MICALL1  |
| 2981.1 | Ral-GDS-related protein            | 0.00E+00 | 2.82E+05 | 2.82E+05 | 2.82E+05 | NULL | AS | E9PH21   | RGL4     |
| 2735.1 | HLA class II histocompatibility ar | 0.00E+00 | 2.82E+05 | 2.82E+05 | 2.82E+05 | NULL | AS | P04440   | HLA_DPB1 |
| 1383.1 | Structural maintenance of chror    | 0.00E+00 | 2.83E+05 | 2.83E+05 | 2.83E+05 | NULL | AS | Q14683   | SMC1A    |
| 1698.1 | HCG2002594, isoform CRA_c          | 0.00E+00 | 2.83E+05 | 2.83E+05 | 2.83E+05 | NULL | AS | G3XAH0   | SEPT5    |
| 2200.1 | B-cell linker protein              | 0.00E+00 | 2.83E+05 | 2.83E+05 | 2.83E+05 | NULL | AS | Q8WV28   | BLNK     |
| 3264.1 | Nance-Horan syndrome protein       | 0.00E+00 | 2.83E+05 | 2.83E+05 | 2.83E+05 | NULL | AS | Q6T4R5   | NHS      |
| 1515.1 | Tektin-4                           | 0.00E+00 | 2.84E+05 | 2.84E+05 | 2.84E+05 | NULL | AS | Q8WW24   | TEKT4    |
| 2183.1 | Isoform 2 of Ubiquitin thioester   | 0.00E+00 | 2.84E+05 | 2.84E+05 | 2.84E+05 | NULL | AS | Q96FW1-2 | OTUB1    |
| 2278.1 | Cyclin C                           | 0.00E+00 | 2.84E+05 | 2.84E+05 | 2.84E+05 | NULL | AS | Q5JV82   | CCNC     |
| 2040.1 | Thyroid receptor-interacting prc   | 0.00E+00 | 2.85E+05 | 2.85E+05 | 2.85E+05 | NULL | AS | Q15643   | TRIP11   |
| 3261.1 | Isoform H7 of Myeloperoxidase      | 0.00E+00 | 2.85E+05 | 2.85E+05 | 2.85E+05 | NULL | AS | P05164-3 | MPO      |
| 2962.1 | Kinesin-like protein KIF17         | 0.00E+00 | 2.86E+05 | 2.86E+05 | 2.86E+05 | NULL | AS | Q9P2E2   | KIF17    |
| 3251.1 | Kelch repeat and BTB domain-cc     | 0.00E+00 | 2.87E+05 | 2.87E+05 | 2.87E+05 | NULL | AS | Q8Nfy9   | KBTBD8   |
| 1519.1 | Ubiquinone biosynthesis monoc      | 0.00E+00 | 2.91E+05 | 2.91E+05 | 2.91E+05 | NULL | AS | G3V4A6   | COQ6     |
| 963.1  | Isoform 4 of Kinesin-like protein  | 0.00E+00 | 2.92E+05 | 2.92E+05 | 2.92E+05 | NULL | AS | O00139-4 | KIF2A    |
| 1377.1 | 3-hydroxyisobutyrate dehydrogi     | 0.00E+00 | 2.92E+05 | 2.92E+05 | 2.92E+05 | NULL | AS | P31937   | HIBADH   |
| 2698.1 | Four and a half LIM domains prc    | 0.00E+00 | 2.93E+05 | 2.93E+05 | 2.93E+05 | NULL | AS | Q13642   | FHL1     |
| 3258.1 | Ankyrin-2                          | 0.00E+00 | 2.93E+05 | 2.93E+05 | 2.93E+05 | NULL | AS | Q01484   | ANK2     |
| 3255.1 | ER degradation-enhancing alpha     | 0.00E+00 | 2.95E+05 | 2.95E+05 | 2.95E+05 | NULL | AS | Q9BV94   | EDEM2    |
| 281.2  | High mobility group protein B2     | 0.00E+00 | 2.96E+05 | 2.96E+05 | 2.96E+05 | NULL | AS | P26583   | HMGB2    |
| 2026.1 | Zinc finger protein 41             | 0.00E+00 | 2.96E+05 | 2.96E+05 | 2.96E+05 | NULL | AS | P51814   | ZNF41    |
| 2523.1 | Acyl-coenzyme A thioesterase 8     | 0.00E+00 | 2.97E+05 | 2.97E+05 | 2.97E+05 | NULL | AS | E9PIS4   | ACOT8    |



|        |                                    |          |          |          |          |      |    |          |           |
|--------|------------------------------------|----------|----------|----------|----------|------|----|----------|-----------|
| 1897.1 | Mitotic checkpoint serine/threo    | 0.00E+00 | 2.98E+05 | 2.98E+05 | 2.98E+05 | NULL | AS | O43683   | BUB1      |
| 2802.1 | Recombining binding protein su     | 0.00E+00 | 2.98E+05 | 2.98E+05 | 2.98E+05 | NULL | AS | Q9UBG7   | RBPJL     |
| 96.3   | Far upstream element-binding p     | 0.00E+00 | 3.00E+05 | 3.00E+05 | 3.00E+05 | NULL | AS | Q96I24   | FUBP3     |
| 1529.1 | Zinc finger protein 292            | 0.00E+00 | 3.03E+05 | 3.03E+05 | 3.03E+05 | NULL | AS | O60281   | ZNF292    |
| 1790.1 | Double-strand-break repair prot    | 0.00E+00 | 3.03E+05 | 3.03E+05 | 3.03E+05 | NULL | AS | O60216   | RAD21     |
| 2894.1 | Receptor-transporting protein 1    | 0.00E+00 | 3.04E+05 | 3.04E+05 | 3.04E+05 | NULL | AS | P59025   | RTP1      |
| 1230.1 | Acyl-coenzyme A thioesterase 1     | 0.00E+00 | 3.07E+05 | 3.07E+05 | 3.07E+05 | NULL | AS | Q9NPJ3   | ACOT13    |
| 2704.1 | Proline-rich protein PRCC          | 0.00E+00 | 3.07E+05 | 3.07E+05 | 3.07E+05 | NULL | AS | Q92733   | PRCC      |
| 960.1  | SH3 domain-binding glutamic ac     | 0.00E+00 | 3.08E+05 | 3.08E+05 | 3.08E+05 | NULL | AS | Q9H299   | SH3BGR3   |
| 1747.1 | Isoform 2 of Lysine-specific dem   | 0.00E+00 | 3.09E+05 | 3.09E+05 | 3.09E+05 | NULL | AS | Q9UGL1-2 | KDM5B     |
| 2028.1 | Paired immunoglobulin-like typ     | 0.00E+00 | 3.09E+05 | 3.09E+05 | 3.09E+05 | NULL | AS | Q9UKJ1   | PILRA     |
| 2702.1 | Isoform 2 of EVI5-like protein     | 0.00E+00 | 3.10E+05 | 3.10E+05 | 3.10E+05 | NULL | AS | Q96CN4-2 | EVI5L     |
| 3187.1 | 1-acyl-sn-glycerol-3-phosphate :   | 0.00E+00 | 3.10E+05 | 3.10E+05 | 3.10E+05 | NULL | AS | Q9NUQ2   | AGPAT5    |
| 663.1  | mRNA export factor                 | 0.00E+00 | 3.11E+05 | 3.11E+05 | 3.11E+05 | NULL | AS | P78406   | RAE1      |
| 1173.1 | Isoform 3 of Cyclin-Y              | 0.00E+00 | 3.12E+05 | 3.12E+05 | 3.12E+05 | NULL | AS | Q8ND76-3 | CCNY      |
| 1290.1 | SRSF protein kinase 3              | 0.00E+00 | 3.14E+05 | 3.14E+05 | 3.14E+05 | NULL | AS | E7ETV6   | SRPK3     |
| 897.1  | E3 ubiquitin-protein ligase TRIM   | 0.00E+00 | 3.15E+05 | 3.15E+05 | 3.15E+05 | NULL | AS | Q8WV44   | TRIM41    |
| 1542.1 | Cullin-3                           | 0.00E+00 | 3.15E+05 | 3.15E+05 | 3.15E+05 | NULL | AS | Q13618   | CUL3      |
| 2663.1 | THUMP domain-containing prot       | 0.00E+00 | 3.17E+05 | 3.17E+05 | 3.17E+05 | NULL | AS | J3KQB0   | THUMPD1   |
| 1307.1 | Protein SERAC1                     | 0.00E+00 | 3.20E+05 | 3.20E+05 | 3.20E+05 | NULL | AS | Q96JX3   | SERAC1    |
| 3067.1 | Isoform 2 of Roundabout homol      | 0.00E+00 | 3.20E+05 | 3.20E+05 | 3.20E+05 | NULL | AS | Q9Y6N7-2 | ROBO1     |
| 729.1  | Heterogeneous nuclear ribonuc      | 0.00E+00 | 3.21E+05 | 3.21E+05 | 3.21E+05 | NULL | AS | Q9BUJ2   | HNRNPUL1  |
| 2128.1 | Protein naked cuticle homolog 1    | 0.00E+00 | 3.21E+05 | 3.21E+05 | 3.21E+05 | NULL | AS | Q969G9   | NKD1      |
| 3197.1 | Mitogen-activated protein kinas    | 0.00E+00 | 3.21E+05 | 3.21E+05 | 3.21E+05 | NULL | AS | Q99683   | MAP3K5    |
| 2954.1 | Bromodomain-containing prote       | 0.00E+00 | 3.22E+05 | 3.22E+05 | 3.22E+05 | NULL | AS | O60885   | BRD4      |
| 1829.1 | YY1-associated protein 1           | 0.00E+00 | 3.23E+05 | 3.23E+05 | 3.23E+05 | NULL | AS | Q9H869   | YY1AP1    |
| 2235.1 | Isoform 2 of Rho guanine nuclec    | 0.00E+00 | 3.25E+05 | 3.25E+05 | 3.25E+05 | NULL | AS | Q9NR81-2 | ARHGEF3   |
| 2848.1 | Protein kinase C alpha type        | 0.00E+00 | 3.25E+05 | 3.25E+05 | 3.25E+05 | NULL | AS | P17252   | PRKCA     |
| 2740.1 | Cerebellin-2                       | 0.00E+00 | 3.26E+05 | 3.26E+05 | 3.26E+05 | NULL | AS | Q8IU88   | CBLN2     |
| 2257.1 | Myelin-associated oligodendroc     | 0.00E+00 | 3.27E+05 | 3.27E+05 | 3.27E+05 | NULL | AS | G5E945   | MOBP      |
| 1161.1 | Coiled-coil-helix-coiled-coil-heli | 0.00E+00 | 3.28E+05 | 3.28E+05 | 3.28E+05 | NULL | AS | Q8N8C4   | CHCHD5    |
| 3225.1 | Transmembrane protease serine      | 0.00E+00 | 3.29E+05 | 3.29E+05 | 3.29E+05 | NULL | AS | O60235   | TMPRSS11D |
| 2818.1 | 52 kDa repressor of the inhibito   | 0.00E+00 | 3.32E+05 | 3.32E+05 | 3.32E+05 | NULL | AS | O43422   | PRKRIR    |
| 2064.1 | Isoform 2 of INO80 complex sub     | 0.00E+00 | 3.34E+05 | 3.34E+05 | 3.34E+05 | NULL | AS | Q53TQ3-2 | INO80D    |
| 2754.1 | N-acetylated-alpha-linked acidic   | 0.00E+00 | 3.34E+05 | 3.34E+05 | 3.34E+05 | NULL | AS | Q9Y3Q0   | NAALAD2   |

|        |                                            |          |          |          |          |      |    |          |            |
|--------|--------------------------------------------|----------|----------|----------|----------|------|----|----------|------------|
| 1755.1 | Leucine-rich PPR motif-containing          | 0.00E+00 | 3.36E+05 | 3.36E+05 | 3.36E+05 | NULL | AS | P42704   | LRPPRC     |
| 2528.1 | Isoform 3 of Engulfment and cell           | 0.00E+00 | 3.37E+05 | 3.37E+05 | 3.37E+05 | NULL | AS | Q92556-3 | ELMO1      |
| 1807.1 | Putative zinc finger protein 726f          | 0.00E+00 | 3.38E+05 | 3.38E+05 | 3.38E+05 | NULL | AS | Q15940   | ZNF726P1   |
| 1086.1 | Probable G-protein coupled receptor        | 0.00E+00 | 3.41E+05 | 3.41E+05 | 3.41E+05 | NULL | AS | O15354   | GPR37      |
| 1320.1 | Isoform 2 of A disintegrin and metallo     | 0.00E+00 | 3.42E+05 | 3.42E+05 | 3.42E+05 | NULL | AS | Q8TE60-2 | ADAMTS18   |
| 2419.1 | Histone deacetylase 7                      | 0.00E+00 | 3.42E+05 | 3.42E+05 | 3.42E+05 | NULL | AS | J3KPH8   | HDAC7      |
| 1916.1 | Advanced glycosylation end product         | 0.00E+00 | 3.42E+05 | 3.42E+05 | 3.42E+05 | NULL | AS | Q15109   | AGER       |
| 1144.1 | Alpha-N-acetylglucosaminidase              | 0.00E+00 | 3.44E+05 | 3.44E+05 | 3.44E+05 | NULL | AS | P54802   | NAGLU      |
| 1753.1 | Lamin-B1                                   | 0.00E+00 | 3.44E+05 | 3.44E+05 | 3.44E+05 | NULL | AS | P20700   | LMNB1      |
| 1861.1 | Insulin gene enhancer protein IS           | 0.00E+00 | 3.44E+05 | 3.44E+05 | 3.44E+05 | NULL | AS | Q96A47   | ISL2       |
| 1432.1 | Sorbin and SH3 domain-containing           | 0.00E+00 | 3.44E+05 | 3.44E+05 | 3.44E+05 | NULL | AS | O94875   | SORBS2     |
| 3.5    | Keratin, type II cuticular Hb4             | 0.00E+00 | 3.46E+05 | 3.46E+05 | 3.46E+05 | NULL | AS | Q9NSB2   | KRT84      |
| 1228.1 | Synaptojanin-2                             | 0.00E+00 | 3.47E+05 | 3.47E+05 | 3.47E+05 | NULL | AS | O15056   | SYNJ2      |
| 1226.1 | Sentan                                     | 0.00E+00 | 3.48E+05 | 3.48E+05 | 3.48E+05 | NULL | AS | C9JXY5   | SNTN       |
| 3247.1 | Ankyrin repeat domain-containing           | 0.00E+00 | 3.49E+05 | 3.49E+05 | 3.49E+05 | NULL | AS | Q5CZ79   | ANKRD20A8P |
| 1588.1 | Zinc finger protein 524                    | 0.00E+00 | 3.50E+05 | 3.50E+05 | 3.50E+05 | NULL | AS | Q96C55   | ZNF524     |
| 2298.1 | Hemoglobin subunit alpha                   | 0.00E+00 | 3.50E+05 | 3.50E+05 | 3.50E+05 | NULL | AS | P69905   | HBA1       |
| 2903.1 | Armadillo repeat protein deleted           | 0.00E+00 | 3.50E+05 | 3.50E+05 | 3.50E+05 | NULL | AS | O00192   | ARVCF      |
| 3047.1 | Versican core protein                      | 0.00E+00 | 3.50E+05 | 3.50E+05 | 3.50E+05 | NULL | AS | P13611   | VCAN       |
| 1195.1 | Probable E3 ubiquitin-protein ligase       | 0.00E+00 | 3.51E+05 | 3.51E+05 | 3.51E+05 | NULL | AS | Q15751   | HERC1      |
| 1940.1 | Sorcin                                     | 0.00E+00 | 3.52E+05 | 3.52E+05 | 3.52E+05 | NULL | AS | P30626   | SRI        |
| 2734.1 | Protocadherin beta-1                       | 0.00E+00 | 3.52E+05 | 3.52E+05 | 3.52E+05 | NULL | AS | Q9Y5F3   | PCDHB1     |
| 3135.1 | Protein Z-dependent protease inhibitor     | 0.00E+00 | 3.52E+05 | 3.52E+05 | 3.52E+05 | NULL | AS | G3V2W1   | SERPINA10  |
| 3243.1 | Eukaryotic translation initiation          | 0.00E+00 | 3.53E+05 | 3.53E+05 | 3.53E+05 | NULL | AS | Q9P2K8   | EIF2AK4    |
| 1351.1 | HERV-K_5q33.3 provirus ancestor            | 0.00E+00 | 3.54E+05 | 3.54E+05 | 3.54E+05 | NULL | AS | P10266   | POK10      |
| 1185.1 | Cyclin-D1-binding protein 1                | 0.00E+00 | 3.55E+05 | 3.55E+05 | 3.55E+05 | NULL | AS | O95273   | CCNDBP1    |
| 1909.1 | Methyltransferase-like protein 2           | 0.00E+00 | 3.55E+05 | 3.55E+05 | 3.55E+05 | NULL | AS | Q9BUU2   | METTL22    |
| 1051.1 | Kelch domain-containing protein            | 0.00E+00 | 3.59E+05 | 3.59E+05 | 3.59E+05 | NULL | AS | Q9Y2U9   | KLHDC2     |
| 1360.2 | Isoform 2 of Myosin phosphatase            | 0.00E+00 | 3.59E+05 | 3.59E+05 | 3.59E+05 | NULL | AS | Q6WCQ1-2 | MPRIP      |
| 3110.1 | Isoform 3 of Protein shisa-6 homolog       | 0.00E+00 | 3.60E+05 | 3.60E+05 | 3.60E+05 | NULL | AS | Q6ZSJ9-3 | SHISA6     |
| 849.1  | Cathepsin Z                                | 0.00E+00 | 3.61E+05 | 3.61E+05 | 3.61E+05 | NULL | AS | Q9UBR2   | CTSZ       |
| 2931.1 | NXPE family member 3                       | 0.00E+00 | 3.61E+05 | 3.61E+05 | 3.61E+05 | NULL | AS | Q969Y0   | NXPE3      |
| 981.1  | Adenylate kinase isoenzyme 4, r            | 0.00E+00 | 3.63E+05 | 3.63E+05 | 3.63E+05 | NULL | AS | P27144   | AK4        |
| 1646.1 | Enoyl-CoA delta isomerase 1, mitochondrial | 0.00E+00 | 3.63E+05 | 3.63E+05 | 3.63E+05 | NULL | AS | P42126   | ECI1       |
| 789.1  | Small EDRK-rich factor 2                   | 0.00E+00 | 3.64E+05 | 3.64E+05 | 3.64E+05 | NULL | AS | P84101   | SERF2      |

|        |                                   |          |          |          |          |      |    |          |         |
|--------|-----------------------------------|----------|----------|----------|----------|------|----|----------|---------|
| 942.1  | Protein SZT2                      | 0.00E+00 | 3.64E+05 | 3.64E+05 | 3.64E+05 | NULL | AS | Q5T011   | SZT2    |
| 1218.1 | Isoform 2 of MAX gene-associat    | 0.00E+00 | 3.66E+05 | 3.66E+05 | 3.66E+05 | NULL | AS | Q8IWI9-2 | MGA     |
| 2124.1 | Telomeric repeat-binding factor   | 0.00E+00 | 3.66E+05 | 3.66E+05 | 3.66E+05 | NULL | AS | Q15554   | TERF2   |
| 1141.1 | N-alpha-acetyltransferase 25, N   | 0.00E+00 | 3.68E+05 | 3.68E+05 | 3.68E+05 | NULL | AS | Q14CX7   | NAA25   |
| 1786.1 | FYVE, RhoGEF and PH domain c      | 0.00E+00 | 3.68E+05 | 3.68E+05 | 3.68E+05 | NULL | AS | G3XA97   | FGD4    |
| 1456.1 | Leucine-rich repeat and WD rep    | 0.00E+00 | 3.74E+05 | 3.74E+05 | 3.74E+05 | NULL | AS | Q9UFC0   | LRWD1   |
| 2852.1 | Histone deacetylase 2             | 0.00E+00 | 3.74E+05 | 3.74E+05 | 3.74E+05 | NULL | AS | J3KPW7   | HDAC2   |
| 2971.1 | Ubiquinone biosynthesis proteir   | 0.00E+00 | 3.74E+05 | 3.74E+05 | 3.74E+05 | NULL | AS | O75208   | COQ9    |
| 1193.1 | Potassium/sodium hyperpolariz     | 0.00E+00 | 3.76E+05 | 3.76E+05 | 3.76E+05 | NULL | AS | Q9Y3Q4   | HCN4    |
| 678.1  | Protein flightless-1 homolog      | 0.00E+00 | 3.80E+05 | 3.80E+05 | 3.80E+05 | NULL | AS | Q13045   | FLII    |
| 2458.1 | Dual specificity mitogen-activat  | 0.00E+00 | 3.80E+05 | 3.80E+05 | 3.80E+05 | NULL | AS | P36507   | MAP2K2  |
| 2888.1 | Tetratricopeptide repeat proteir  | 0.00E+00 | 3.81E+05 | 3.81E+05 | 3.81E+05 | NULL | AS | Q6PGP7   | TTC37   |
| 1992.1 | Unconventional myosin-Ic          | 0.00E+00 | 3.82E+05 | 3.82E+05 | 3.82E+05 | NULL | AS | O00159   | MYO1C   |
| 3127.1 | Testican-3                        | 0.00E+00 | 3.83E+05 | 3.83E+05 | 3.83E+05 | NULL | AS | Q9BQ16   | SPOCK3  |
| 974.1  | Isoform 3 of Importin-5           | 0.00E+00 | 3.84E+05 | 3.84E+05 | 3.84E+05 | NULL | AS | O00410-3 | IPO5    |
| 2987.1 | DEP domain-containing protein     | 0.00E+00 | 3.84E+05 | 3.84E+05 | 3.84E+05 | NULL | AS | Q5TB30   | DEPDC1  |
| 841.1  | U6 snRNA-associated Sm-like pr    | 0.00E+00 | 3.86E+05 | 3.86E+05 | 3.86E+05 | NULL | AS | Q9Y4Z0   | LSM4    |
| 2212.1 | Isoform 2 of Janus kinase and m   | 0.00E+00 | 3.87E+05 | 3.87E+05 | 3.87E+05 | NULL | AS | Q96N16-2 | JAKMIP1 |
| 2350.1 | Protein atonal homolog 1          | 0.00E+00 | 3.88E+05 | 3.88E+05 | 3.88E+05 | NULL | AS | Q92858   | ATOH1   |
| 2133.1 | Transmembrane and TPR repea       | 0.00E+00 | 3.91E+05 | 3.91E+05 | 3.91E+05 | NULL | AS | Q6ZXV5   | TMTC3   |
| 1151.1 | Protein Dom3Z                     | 0.00E+00 | 3.92E+05 | 3.92E+05 | 3.92E+05 | NULL | AS | O77932   | DOM3Z   |
| 1451.1 | Isoform 3 of Twinfilin-1          | 0.00E+00 | 3.93E+05 | 3.93E+05 | 3.93E+05 | NULL | AS | Q12792-3 | TWF1    |
| 836.1  | Eukaryotic translation initiation | 0.00E+00 | 3.97E+05 | 3.97E+05 | 3.97E+05 | NULL | AS | P55010   | EIF5    |
| 2370.1 | Semenogelin-1                     | 0.00E+00 | 3.99E+05 | 3.99E+05 | 3.99E+05 | NULL | AS | P04279   | SEMG1   |
| 3154.1 | Protein phosphatase 1F            | 0.00E+00 | 3.99E+05 | 3.99E+05 | 3.99E+05 | NULL | AS | A8MX49   | PPM1F   |
| 917.1  | Neuron navigator 3                | 0.00E+00 | 4.00E+05 | 4.00E+05 | 4.00E+05 | NULL | AS | Q8IVL0   | NAV3    |
| 2866.1 | Tudor and KH domain-containin     | 0.00E+00 | 4.04E+05 | 4.04E+05 | 4.04E+05 | NULL | AS | Q9Y2W6   | TDRKH   |
| 1586.1 | DNA polymerase subunit gamm       | 0.00E+00 | 4.07E+05 | 4.07E+05 | 4.07E+05 | NULL | AS | Q9UHN1   | POLG2   |
| 3228.1 | Ras-related GTP-binding protein   | 0.00E+00 | 4.13E+05 | 4.13E+05 | 4.13E+05 | NULL | AS | Q5VZM2   | RRAGB   |
| 795.1  | Cleavage stimulation factor sub   | 0.00E+00 | 4.14E+05 | 4.14E+05 | 4.14E+05 | NULL | AS | Q9H0L4   | CSTF2T  |
| 1503.1 | RNA polymerase-associated pro     | 0.00E+00 | 4.14E+05 | 4.14E+05 | 4.14E+05 | NULL | AS | Q6PD62   | CTR9    |
| 2375.1 | Biorientation of chromosomes i    | 0.00E+00 | 4.15E+05 | 4.15E+05 | 4.15E+05 | NULL | AS | Q8NFC6   | BOD1L1  |
| 572.2  | Adenine phosphoribosyltransfer    | 0.00E+00 | 4.18E+05 | 4.18E+05 | 4.18E+05 | NULL | AS | H3BQZ9   | APRT    |
| 2594.1 | Serine/threonine-protein kinase   | 0.00E+00 | 4.22E+05 | 4.22E+05 | 4.22E+05 | NULL | AS | Q9P0L2   | MARK1   |
| 2145.1 | Kinesin-like protein KIF3A        | 0.00E+00 | 4.26E+05 | 4.26E+05 | 4.26E+05 | NULL | AS | E9PES4   | KIF3A   |

|        |                                                       |          |          |          |          |      |    |          |         |
|--------|-------------------------------------------------------|----------|----------|----------|----------|------|----|----------|---------|
| 2157.1 | Transmembrane protein 199                             | 0.00E+00 | 4.26E+05 | 4.26E+05 | 4.26E+05 | NULL | AS | E9PBQ3   | TMEM199 |
| 2398.1 | Cyclin-dependent kinase 6                             | 0.00E+00 | 4.26E+05 | 4.26E+05 | 4.26E+05 | NULL | AS | Q00534   | CDK6    |
| 745.1  | Pre-rRNA-processing protein TSI                       | 0.00E+00 | 4.31E+05 | 4.31E+05 | 4.31E+05 | NULL | AS | Q2NL82   | TSR1    |
| 1768.1 | Isoform 3 of Cytosolic carboxypeptidase Y             | 0.00E+00 | 4.32E+05 | 4.32E+05 | 4.32E+05 | NULL | AS | Q9UPW5-3 | AGTPBP1 |
| 1418.1 | ATP-binding cassette sub-family 12 member 1           | 0.00E+00 | 4.33E+05 | 4.33E+05 | 4.33E+05 | NULL | AS | Q9NUQ8   | ABCF3   |
| 2127.1 | Isoform 7 of Aryl hydrocarbon receptor 1              | 0.00E+00 | 4.33E+05 | 4.33E+05 | 4.33E+05 | NULL | AS | Q8WYA1-7 | ARNTL2  |
| 613.1  | 60S ribosomal protein L12                             | 0.00E+00 | 4.34E+05 | 4.34E+05 | 4.34E+05 | NULL | AS | P30050   | RPL12   |
| 1544.1 | Leucine-rich repeat-containing protein 10             | 0.00E+00 | 4.35E+05 | 4.35E+05 | 4.35E+05 | NULL | AS | Q9BTT6   | LRRC1   |
| 1944.1 | 5-azacytidine-induced protein 1                       | 0.00E+00 | 4.35E+05 | 4.35E+05 | 4.35E+05 | NULL | AS | Q9UPN4   | AZI1    |
| 1745.1 | Isoform B3 of Smoothelin                              | 0.00E+00 | 4.38E+05 | 4.38E+05 | 4.38E+05 | NULL | AS | P53814-6 | SMTN    |
| 1251.1 | Collagen alpha-3(VI) chain                            | 0.00E+00 | 4.40E+05 | 4.40E+05 | 4.40E+05 | NULL | AS | P12111   | COL6A3  |
| 3198.1 | Integrator complex subunit 7                          | 0.00E+00 | 4.40E+05 | 4.40E+05 | 4.40E+05 | NULL | AS | Q9NVH2   | INTS7   |
| 676.1  | Protein Red                                           | 0.00E+00 | 4.41E+05 | 4.41E+05 | 4.41E+05 | NULL | AS | Q13123   | IK      |
| 1486.1 | Serine/threonine-protein kinase PDK1                  | 0.00E+00 | 4.43E+05 | 4.43E+05 | 4.43E+05 | NULL | AS | Q9C098   | DCLK3   |
| 1034.1 | Dynamin-like 120 kDa protein, non-catalytic           | 0.00E+00 | 4.44E+05 | 4.44E+05 | 4.44E+05 | NULL | AS | E5KIJ5   | OPA1    |
| 1147.1 | Isoform 2 of Calmodulin-regulated protein kinase II   | 0.00E+00 | 4.44E+05 | 4.44E+05 | 4.44E+05 | NULL | AS | Q9P1Y5-2 | CAMSAP3 |
| 1165.1 | Eukaryotic translation initiation factor 3            | 0.00E+00 | 4.46E+05 | 4.46E+05 | 4.46E+05 | NULL | AS | Q9UBQ5   | EIF3K   |
| 826.1  | Biliverdin reductase A                                | 0.00E+00 | 4.47E+05 | 4.47E+05 | 4.47E+05 | NULL | AS | P53004   | BLVRA   |
| 1358.1 | Synaptonemal complex protein 1                        | 0.00E+00 | 4.47E+05 | 4.47E+05 | 4.47E+05 | NULL | AS | Q8IZU3   | SYCP3   |
| 1677.1 | Transmembrane protein 168                             | 0.00E+00 | 4.47E+05 | 4.47E+05 | 4.47E+05 | NULL | AS | Q9H0V1   | TMEM168 |
| 1776.1 | Armadillo repeat-containing X-linked protein 1        | 0.00E+00 | 4.47E+05 | 4.47E+05 | 4.47E+05 | NULL | AS | Q7L311   | ARMCX2  |
| 2302.1 | Lysozyme g-like protein 1                             | 0.00E+00 | 4.48E+05 | 4.48E+05 | 4.48E+05 | NULL | AS | Q8N1E2   | LYG1    |
| 1557.1 | Protein FAM110D                                       | 0.00E+00 | 4.49E+05 | 4.49E+05 | 4.49E+05 | NULL | AS | Q8TAY7   | FAM110D |
| 3096.1 | ATP synthase subunit s-like protein                   | 0.00E+00 | 4.53E+05 | 4.53E+05 | 4.53E+05 | NULL | AS | Q9NW81   | ATP5SL  |
| 1714.1 | Interferon-induced helicase C domain containing 1     | 0.00E+00 | 4.54E+05 | 4.54E+05 | 4.54E+05 | NULL | AS | Q9BYX4   | IFIH1   |
| 2957.1 | Transcription factor HES-5                            | 0.00E+00 | 4.54E+05 | 4.54E+05 | 4.54E+05 | NULL | AS | Q5TA89   | HES5    |
| 1216.1 | Leucine-rich repeat serine/threonine protein kinase 1 | 0.00E+00 | 4.55E+05 | 4.55E+05 | 4.55E+05 | NULL | AS | Q5S007   | LRRK2   |
| 2958.1 | F-box only protein 27                                 | 0.00E+00 | 4.55E+05 | 4.55E+05 | 4.55E+05 | NULL | AS | Q8NI29   | FBXO27  |
| 1772.1 | Zinc finger protein 236                               | 0.00E+00 | 4.57E+05 | 4.57E+05 | 4.57E+05 | NULL | AS | J9JID5   | ZNF236  |
| 650.1  | Apoptosis-inducing factor 1, mitochondrial            | 0.00E+00 | 4.59E+05 | 4.59E+05 | 4.59E+05 | NULL | AS | Q95831   | AIFM1   |
| 2636.1 | Isoform 3 of Receptor-type tyrosine kinase 1          | 0.00E+00 | 4.62E+05 | 4.62E+05 | 4.62E+05 | NULL | AS | P23467-3 | PTPRB   |
| 2812.1 | Ankyrin repeat domain-containing protein 1            | 0.00E+00 | 4.62E+05 | 4.62E+05 | 4.62E+05 | NULL | AS | C9JTQ0   | ANKRD63 |
| 3157.1 | Death-associated protein kinase 1                     | 0.00E+00 | 4.63E+05 | 4.63E+05 | 4.63E+05 | NULL | AS | Q5T8F1   | DAPK1   |
| 1465.1 | Sorting nexin-5                                       | 0.00E+00 | 4.64E+05 | 4.64E+05 | 4.64E+05 | NULL | AS | Q9Y5X3   | SNX5    |
| 1149.1 | Alpha-mannosidase 2C1                                 | 0.00E+00 | 4.65E+05 | 4.65E+05 | 4.65E+05 | NULL | AS | Q9NTJ4   | MAN2C1  |

|        |                                    |          |          |          |          |      |    |          |         |
|--------|------------------------------------|----------|----------|----------|----------|------|----|----------|---------|
| 715.1  | Coiled-coil domain-containing p    | 0.00E+00 | 4.67E+05 | 4.67E+05 | 4.67E+05 | NULL | AS | Q16204   | CCDC6   |
| 1163.1 | Katanin p80 WD40 repeat-conta      | 0.00E+00 | 4.67E+05 | 4.67E+05 | 4.67E+05 | NULL | AS | Q9BVA0   | KATNB1  |
| 1381.1 | Polyadenylate-binding protein-i    | 0.00E+00 | 4.67E+05 | 4.67E+05 | 4.67E+05 | NULL | AS | Q9BPZ3   | PAIP2   |
| 656.1  | Peptidyl-prolyl cis-trans isomera  | 0.00E+00 | 4.68E+05 | 4.68E+05 | 4.68E+05 | NULL | AS | P30405   | PPIF    |
| 1427.1 | Isoform 2 of HLA class I histocor  | 0.00E+00 | 4.69E+05 | 4.69E+05 | 4.69E+05 | NULL | AS | P13746-2 | HLA-A   |
| 1702.1 | Tumor necrosis factor receptor :   | 0.00E+00 | 4.69E+05 | 4.69E+05 | 4.69E+05 | NULL | AS | Q969Z4   | RELT    |
| 1313.1 | E3 ubiquitin-protein ligase HECT   | 0.00E+00 | 4.72E+05 | 4.72E+05 | 4.72E+05 | NULL | AS | Q5T447   | HECTD3  |
| 3004.1 | SLIT and NTRK-like protein 4       | 0.00E+00 | 4.72E+05 | 4.72E+05 | 4.72E+05 | NULL | AS | Q8IW52   | SLITRK4 |
| 2842.1 | KAT8 regulatory NSL complex su     | 0.00E+00 | 4.73E+05 | 4.73E+05 | 4.73E+05 | NULL | AS | A0AUZ9   | KANSL1L |
| 1473.1 | Nuclear pore complex protein N     | 0.00E+00 | 4.76E+05 | 4.76E+05 | 4.76E+05 | NULL | AS | Q8N1F7   | NUP93   |
| 636.1  | Serine/arginine-rich splicing fact | 0.00E+00 | 4.79E+05 | 4.79E+05 | 4.79E+05 | NULL | AS | Q13242   | SRSF9   |
| 2880.1 | RING finger protein 113A           | 0.00E+00 | 4.80E+05 | 4.80E+05 | 4.80E+05 | NULL | AS | O15541   | RNF113A |
| 2610.1 | Phytanoyl-CoA hydroxylase-inte     | 0.00E+00 | 4.83E+05 | 4.83E+05 | 4.83E+05 | NULL | AS | Q96FC7   | PHYHIPL |
| 1140.1 | Ubiquitin-associated protein 2     | 0.00E+00 | 4.84E+05 | 4.84E+05 | 4.84E+05 | NULL | AS | E7EWG4   | UBAP2   |
| 1422.1 | Signal peptide, CUB and EGF-like   | 0.00E+00 | 4.86E+05 | 4.86E+05 | 4.86E+05 | NULL | AS | Q8IWY4   | SCUBE1  |
| 752.1  | Probable ATP-dependent RNA h       | 0.00E+00 | 4.89E+05 | 4.89E+05 | 4.89E+05 | NULL | AS | Q7L014   | DDX46   |
| 2264.1 | Zinc/RING finger protein 4         | 0.00E+00 | 4.90E+05 | 4.90E+05 | 4.90E+05 | NULL | AS | Q8WWF5   | ZNRF4   |
| 1947.1 | Kappa-type opioid receptor         | 0.00E+00 | 4.91E+05 | 4.91E+05 | 4.91E+05 | NULL | AS | P41145   | OPRK1   |
| 735.1  | Peptidyl-prolyl cis-trans isomera  | 0.00E+00 | 4.93E+05 | 4.93E+05 | 4.93E+05 | NULL | AS | Q5VVH2   | FKBP1C  |
| 727.1  | Hydroxysteroid dehydrogenase-      | 0.00E+00 | 4.94E+05 | 4.94E+05 | 4.94E+05 | NULL | AS | Q6YN16   | HSDL2   |
| 2860.1 | Anion exchange protein 2           | 0.00E+00 | 4.94E+05 | 4.94E+05 | 4.94E+05 | NULL | AS | P04920   | SLC4A2  |
| 1434.1 | C-type lectin domain family 4 m    | 0.00E+00 | 4.95E+05 | 4.95E+05 | 4.95E+05 | NULL | AS | Q8N1N0   | CLEC4F  |
| 3241.1 | Galectin-3                         | 0.00E+00 | 5.00E+05 | 5.00E+05 | 5.00E+05 | NULL | AS | G3V3R6   | LGALS3  |
| 1083.1 | Sel1 repeat-containing protein 1   | 0.00E+00 | 5.02E+05 | 5.02E+05 | 5.02E+05 | NULL | AS | Q96BR5   | SELRC1  |
| 2221.1 | Isoform 2 of Coiled-coil domain-   | 0.00E+00 | 5.02E+05 | 5.02E+05 | 5.02E+05 | NULL | AS | Q8NEF3-2 | CCDC112 |
| 2493.1 | A disintegrin and metalloprotein   | 0.00E+00 | 5.02E+05 | 5.02E+05 | 5.02E+05 | NULL | AS | Q9UNA0   | ADAMTS5 |
| 878.1  | Leucine--tRNA ligase, cytoplasm    | 0.00E+00 | 5.03E+05 | 5.03E+05 | 5.03E+05 | NULL | AS | Q9P2J5   | LARS    |
| 2542.1 | Tsukushin                          | 0.00E+00 | 5.03E+05 | 5.03E+05 | 5.03E+05 | NULL | AS | Q8WUA8   | TSKU    |
| 1458.1 | Semaphorin-3A                      | 0.00E+00 | 5.04E+05 | 5.04E+05 | 5.04E+05 | NULL | AS | Q14563   | SEMA3A  |
| 2313.1 | Phytanoyl-CoA dioxygenase, per     | 0.00E+00 | 5.08E+05 | 5.08E+05 | 5.08E+05 | NULL | AS | O14832   | PHYH    |
| 1003.1 | General transcription factor IIF s | 0.00E+00 | 5.09E+05 | 5.09E+05 | 5.09E+05 | NULL | AS | P35269   | GTF2F1  |
| 1142.1 | Amine oxidase [flavin-containin]   | 0.00E+00 | 5.10E+05 | 5.10E+05 | 5.10E+05 | NULL | AS | P21397   | MAOA    |
| 3079.1 | Protein SOX-15                     | 0.00E+00 | 5.13E+05 | 5.13E+05 | 5.13E+05 | NULL | AS | O60248   | SOX15   |
| 3262.1 | Isoform 4 of Brain-derived neur    | 0.00E+00 | 5.13E+05 | 5.13E+05 | 5.13E+05 | NULL | AS | P23560-4 | BDNF    |
| 521.1  | Transducin-like enhancer protei    | 0.00E+00 | 5.14E+05 | 5.14E+05 | 5.14E+05 | NULL | AS | Q04724   | TLE1    |

|        |                                   |          |          |          |          |      |    |          |          |
|--------|-----------------------------------|----------|----------|----------|----------|------|----|----------|----------|
| 1399.1 | Pleckstrin homology-like domain   | 0.00E+00 | 5.15E+05 | 5.15E+05 | 5.15E+05 | NULL | AS | Q86SQ0   | PHLDB2   |
| 1020.1 | ATP-dependent DNA helicase Q      | 0.00E+00 | 5.20E+05 | 5.20E+05 | 5.20E+05 | NULL | AS | P46063   | RECQL    |
| 1871.1 | Isoform B of Methyl-CpG-bindin    | 0.00E+00 | 5.21E+05 | 5.21E+05 | 5.21E+05 | NULL | AS | P51608-2 | MECP2    |
| 1029.1 | Eukaryotic translation initiation | 0.00E+00 | 5.22E+05 | 5.22E+05 | 5.22E+05 | NULL | AS | B3KSH1   | EIF3F    |
| 2976.1 | Leucine-rich repeat-containing p  | 0.00E+00 | 5.23E+05 | 5.23E+05 | 5.23E+05 | NULL | AS | A6NM11   | LRRC37A2 |
| 1884.1 | Homeobox protein Nkx-6.1          | 0.00E+00 | 5.24E+05 | 5.24E+05 | 5.24E+05 | NULL | AS | P78426   | NKX6-1   |
| 2327.1 | Tyrosine-protein phosphatase n    | 0.00E+00 | 5.24E+05 | 5.24E+05 | 5.24E+05 | NULL | AS | Q9Y2R2   | PTPN22   |
| 2319.1 | Aspartate beta-hydroxylase don    | 0.00E+00 | 5.27E+05 | 5.27E+05 | 5.27E+05 | NULL | AS | Q6ICH7   | ASPHD2   |
| 830.1  | 40S ribosomal protein S29         | 0.00E+00 | 5.29E+05 | 5.29E+05 | 5.29E+05 | NULL | AS | P62273   | RPS29    |
| 1276.1 | Probable peptidyl-tRNA hydrola    | 0.00E+00 | 5.29E+05 | 5.29E+05 | 5.29E+05 | NULL | AS | Q86Y79   | PTRH1    |
| 1921.1 | 26S proteasome non-ATPase re      | 0.00E+00 | 5.33E+05 | 5.33E+05 | 5.33E+05 | NULL | AS | Q16401   | PSMD5    |
| 2990.1 | Periaxin                          | 0.00E+00 | 5.38E+05 | 5.38E+05 | 5.38E+05 | NULL | AS | Q9BXM0   | PRX      |
| 617.2  | Dynamin-2                         | 0.00E+00 | 5.39E+05 | 5.39E+05 | 5.39E+05 | NULL | AS | P50570   | DNM2     |
| 700.1  | Protein FAM114A2                  | 0.00E+00 | 5.40E+05 | 5.40E+05 | 5.40E+05 | NULL | AS | Q9NRY5   | FAM114A2 |
| 1734.1 | NLR family CARD domain-contai     | 0.00E+00 | 5.40E+05 | 5.40E+05 | 5.40E+05 | NULL | AS | Q9NPP4   | NLRC4    |
| 1160.1 | Glutamate dehydrogenase 2, mi     | 0.00E+00 | 5.41E+05 | 5.41E+05 | 5.41E+05 | NULL | AS | P49448   | GLUD2    |
| 1961.1 | Cytoskeleton-associated proteir   | 0.00E+00 | 5.41E+05 | 5.41E+05 | 5.41E+05 | NULL | AS | Q07065   | CKAP4    |
| 198.2  | Fragile X mental retardation syn  | 0.00E+00 | 5.43E+05 | 5.43E+05 | 5.43E+05 | NULL | AS | P51116   | FXR2     |
| 696.1  | Succinyl-CoA ligase [ADP-formin   | 0.00E+00 | 5.44E+05 | 5.44E+05 | 5.44E+05 | NULL | AS | Q9P2R7   | SUCLA2   |
| 1000.1 | Nuclear pore membrane glycopi     | 0.00E+00 | 5.46E+05 | 5.46E+05 | 5.46E+05 | NULL | AS | Q8TEM1   | NUP210   |
| 856.1  | Eukaryotic translation initiation | 0.00E+00 | 5.48E+05 | 5.48E+05 | 5.48E+05 | NULL | AS | O60841   | EIF5B    |
| 1775.1 | AT-rich interactive domain-cont   | 0.00E+00 | 5.48E+05 | 5.48E+05 | 5.48E+05 | NULL | AS | Q68CP9   | ARID2    |
| 2712.1 | Isoform 3 of TPA-induced transr   | 0.00E+00 | 5.48E+05 | 5.48E+05 | 5.48E+05 | NULL | AS | Q5BVD1-3 | TTMP     |
| 615.1  | Serine/threonine-protein phosp    | 0.00E+00 | 5.49E+05 | 5.49E+05 | 5.49E+05 | NULL | AS | Q96QC0   | PPP1R10  |
| 2046.1 | Taperin                           | 0.00E+00 | 5.53E+05 | 5.53E+05 | 5.53E+05 | NULL | AS | Q4KMQ1   | TPRN     |
| 1838.1 | Actin-related protein 2/3 compl   | 0.00E+00 | 5.54E+05 | 5.54E+05 | 5.54E+05 | NULL | AS | O15145   | ARPC3    |
| 2508.1 | C-Maf-inducing protein            | 0.00E+00 | 5.62E+05 | 5.62E+05 | 5.62E+05 | NULL | AS | Q8IY22   | CMIP     |
| 1145.1 | Protocadherin gamma-A9            | 0.00E+00 | 5.63E+05 | 5.63E+05 | 5.63E+05 | NULL | AS | Q9Y5G4   | PCDHGA9  |
| 2364.1 | Mitochondrial dynamic protein     | 0.00E+00 | 5.63E+05 | 5.63E+05 | 5.63E+05 | NULL | AS | B0QY95   | SMCR7L   |
| 1172.1 | Density-regulated protein         | 0.00E+00 | 5.66E+05 | 5.66E+05 | 5.66E+05 | NULL | AS | O43583   | DENR     |
| 3173.1 | Vacuolar protein sorting-associa  | 0.00E+00 | 5.66E+05 | 5.66E+05 | 5.66E+05 | NULL | AS | Q86XT2   | VPS37D   |
| 2743.1 | Protein CREG2                     | 0.00E+00 | 5.68E+05 | 5.68E+05 | 5.68E+05 | NULL | AS | Q8IUH2   | CREG2    |
| 1120.1 | Protein FAM26E                    | 0.00E+00 | 5.70E+05 | 5.70E+05 | 5.70E+05 | NULL | AS | Q8N5C1   | FAM26E   |
| 1219.1 | Sterile alpha motif domain-cont   | 0.00E+00 | 5.70E+05 | 5.70E+05 | 5.70E+05 | NULL | AS | Q5K651   | SAMD9    |
| 3011.1 | Isoform 3 of Peripheral-type ber  | 0.00E+00 | 5.70E+05 | 5.70E+05 | 5.70E+05 | NULL | AS | O95153-3 | BZRAP1   |

|        |                                   |          |          |          |          |      |    |          |               |
|--------|-----------------------------------|----------|----------|----------|----------|------|----|----------|---------------|
| 1560.1 | Isoform 2 of Dual specificity mit | 0.00E+00 | 5.72E+05 | 5.72E+05 | 5.72E+05 | NULL | AS | P45985-2 | MAP2K4        |
| 2823.1 | Inactive phospholipase D5         | 0.00E+00 | 5.75E+05 | 5.75E+05 | 5.75E+05 | NULL | AS | Q8N7P1   | PLD5          |
| 3223.1 | ATP synthase mitochondrial F1 c   | 0.00E+00 | 5.75E+05 | 5.75E+05 | 5.75E+05 | NULL | AS | J3KTB2   | ATPAF2        |
| 2793.1 | 35 kDa inter-alpha-trypsin inhib  | 0.00E+00 | 5.78E+05 | 5.78E+05 | 5.78E+05 | NULL | AS | B7ZKJ8   | ITIH4         |
| 2703.1 | Plasminogen receptor (KT)         | 0.00E+00 | 5.81E+05 | 5.81E+05 | 5.81E+05 | NULL | AS | Q9HBL7   | PLGRKT        |
| 3266.1 | RNA exonuclease 1 homolog         | 0.00E+00 | 5.81E+05 | 5.81E+05 | 5.81E+05 | NULL | AS | Q8N1G1   | REXO1         |
| 962.1  | AF4/FMR2 family member 4          | 0.00E+00 | 5.83E+05 | 5.83E+05 | 5.83E+05 | NULL | AS | Q9UHB7   | AFF4          |
| 1067.1 | Enoyl-CoA hydratase, mitochon     | 0.00E+00 | 5.89E+05 | 5.89E+05 | 5.89E+05 | NULL | AS | P30084   | ECHS1         |
| 1903.1 | Disco-interacting protein 2 hom   | 0.00E+00 | 5.90E+05 | 5.90E+05 | 5.90E+05 | NULL | AS | Q9P265   | DIP2B         |
| 2512.1 | Sodium channel protein type 11    | 0.00E+00 | 5.90E+05 | 5.90E+05 | 5.90E+05 | NULL | AS | Q9UI33   | SCN11A        |
| 662.1  | Lipoamide acyltransferase comp    | 0.00E+00 | 5.92E+05 | 5.92E+05 | 5.92E+05 | NULL | AS | P11182   | DBT           |
| 1904.1 | von Willebrand factor A domain    | 0.00E+00 | 5.92E+05 | 5.92E+05 | 5.92E+05 | NULL | AS | A3KMH1   | VWA8          |
| 2272.1 | Kinase D-interacting substrate o  | 0.00E+00 | 5.96E+05 | 5.96E+05 | 5.96E+05 | NULL | AS | Q9ULH0   | KIDINS220     |
| 1663.1 | Isoform 2 of Rho GTPase-activat   | 0.00E+00 | 5.99E+05 | 5.99E+05 | 5.99E+05 | NULL | AS | P42331-2 | ARHGAP25      |
| 867.1  | Isoform 5 of MAP7 domain-cont     | 0.00E+00 | 6.00E+05 | 6.00E+05 | 6.00E+05 | NULL | AS | Q96T17-5 | MAP7D2        |
| 502.1  | Cordon-bleu protein-like 1        | 0.00E+00 | 6.01E+05 | 6.01E+05 | 6.01E+05 | NULL | AS | G8JL86   | COBL1         |
| 873.1  | Brain-specific angiogenesis inhib | 0.00E+00 | 6.03E+05 | 6.03E+05 | 6.03E+05 | NULL | AS | O14514   | BAI1          |
| 526.1  | Lon protease homolog, mitocho     | 0.00E+00 | 6.11E+05 | 6.11E+05 | 6.11E+05 | NULL | AS | P36776   | LONP1         |
| 628.1  | ATP-binding cassette sub-family   | 0.00E+00 | 6.11E+05 | 6.11E+05 | 6.11E+05 | NULL | AS | P61221   | ABCE1         |
| 618.1  | Carnitine O-acetyltransferase     | 0.00E+00 | 6.14E+05 | 6.14E+05 | 6.14E+05 | NULL | AS | P43155   | CRAT          |
| 1238.1 | N-acetylaspartyl-glutamate synt   | 0.00E+00 | 6.14E+05 | 6.14E+05 | 6.14E+05 | NULL | AS | Q8IXN7   | RIMKLA        |
| 1770.1 | Protein CEP170B                   | 0.00E+00 | 6.20E+05 | 6.20E+05 | 6.20E+05 | NULL | AS | J3KQR7   | CEP170B       |
| 1943.1 | Protein CASC5                     | 0.00E+00 | 6.20E+05 | 6.20E+05 | 6.20E+05 | NULL | AS | Q8NG31   | CASC5         |
| 903.1  | 60S ribosomal protein L35a        | 0.00E+00 | 6.21E+05 | 6.21E+05 | 6.21E+05 | NULL | AS | P18077   | RPL35A        |
| 1583.1 | Nucleolar GTP-binding protein 2   | 0.00E+00 | 6.21E+05 | 6.21E+05 | 6.21E+05 | NULL | AS | Q13823   | GNL2          |
| 1056.1 | DKFZP586J0619 protein             | 0.00E+00 | 6.22E+05 | 6.22E+05 | 6.22E+05 | NULL | AS | A4D212   | DKFZP586J0619 |
| 425.1  | 26S proteasome non-ATPase re      | 0.00E+00 | 6.23E+05 | 6.23E+05 | 6.23E+05 | NULL | AS | Q99460   | PSMD1         |
| 853.1  | Nuclear pore complex protein N    | 0.00E+00 | 6.23E+05 | 6.23E+05 | 6.23E+05 | NULL | AS | F6QR24   | NUP153        |
| 919.1  | Isoform 2 of E3 ubiquitin-protei  | 0.00E+00 | 6.28E+05 | 6.28E+05 | 6.28E+05 | NULL | AS | Q63HN8-4 | RNF213        |
| 1534.1 | Tetratricopeptide repeat protei   | 0.00E+00 | 6.28E+05 | 6.28E+05 | 6.28E+05 | NULL | AS | Q5T0N1   | TTC18         |
| 2546.1 | RNA polymerase II elongation fa   | 0.00E+00 | 6.28E+05 | 6.28E+05 | 6.28E+05 | NULL | AS | O00472   | ELL2          |
| 1763.1 | 5'-AMP-activated protein kinase   | 0.00E+00 | 6.29E+05 | 6.29E+05 | 6.29E+05 | NULL | AS | P54619   | PRKAG1        |
| 2019.1 | HCG30379, isoform CRA_d           | 0.00E+00 | 6.30E+05 | 6.30E+05 | 6.30E+05 | NULL | AS | K4DI98   | NULL          |
| 1272.1 | Leucine-rich repeat-containing r  | 0.00E+00 | 6.31E+05 | 6.31E+05 | 6.31E+05 | NULL | AS | Q7Z2Q7   | LRRC70        |
| 1297.1 | Acyl-Coenzyme A dehydrogenas      | 0.00E+00 | 6.39E+05 | 6.39E+05 | 6.39E+05 | NULL | AS | Q5T4U5   | ACADM         |

|        |                                  |          |          |          |          |      |    |          |          |
|--------|----------------------------------|----------|----------|----------|----------|------|----|----------|----------|
| 3046.1 | Nesprin-1                        | 0.00E+00 | 6.40E+05 | 6.40E+05 | 6.40E+05 | NULL | AS | Q8NF91   | SYNE1    |
| 2344.1 | Anoctamin-3                      | 0.00E+00 | 6.41E+05 | 6.41E+05 | 6.41E+05 | NULL | AS | Q9BYT9   | ANO3     |
| 1533.1 | Isoform 2 of Megakaryocyte-ass   | 0.00E+00 | 6.42E+05 | 6.42E+05 | 6.42E+05 | NULL | AS | P42679-2 | MATK     |
| 2422.1 | Poly(ADP-ribose) glycohydrolase  | 0.00E+00 | 6.42E+05 | 6.42E+05 | 6.42E+05 | NULL | AS | Q86W56   | PARG     |
| 1875.1 | Matrix metalloproteinase-27      | 0.00E+00 | 6.43E+05 | 6.43E+05 | 6.43E+05 | NULL | AS | Q9H306   | MMP27    |
| 1132.1 | Pre-mRNA-processing factor 40    | 0.00E+00 | 6.46E+05 | 6.46E+05 | 6.46E+05 | NULL | AS | O75400   | PRPF40A  |
| 2477.1 | Krueppel-like factor 4           | 0.00E+00 | 6.46E+05 | 6.46E+05 | 6.46E+05 | NULL | AS | O43474   | KLF4     |
| 2557.1 | Cadherin-12                      | 0.00E+00 | 6.50E+05 | 6.50E+05 | 6.50E+05 | NULL | AS | P55289   | CDH12    |
| 1299.1 | Junction-mediating and -regulat  | 0.00E+00 | 6.54E+05 | 6.54E+05 | 6.54E+05 | NULL | AS | Q8N9B5   | JMY      |
| 2414.1 | Junctional sarcoplasmic reticulu | 0.00E+00 | 6.59E+05 | 6.59E+05 | 6.59E+05 | NULL | AS | Q96MG2   | JSRP1    |
| 2190.1 | Metastasis-associated protein N  | 0.00E+00 | 6.69E+05 | 6.69E+05 | 6.69E+05 | NULL | AS | E9PF88   | MTA3     |
| 751.1  | 60S ribosomal protein L19        | 0.00E+00 | 6.70E+05 | 6.70E+05 | 6.70E+05 | NULL | AS | P84098   | RPL19    |
| 564.1  | Purine nucleoside phosphorylas   | 0.00E+00 | 6.71E+05 | 6.71E+05 | 6.71E+05 | NULL | AS | P00491   | PNP      |
| 1411.1 | Protein FAM186A                  | 0.00E+00 | 6.72E+05 | 6.72E+05 | 6.72E+05 | NULL | AS | A6NE01   | FAM186A  |
| 2827.1 | Glutathione S-transferase theta- | 0.00E+00 | 6.73E+05 | 6.73E+05 | 6.73E+05 | NULL | AS | A8MPT4   | GSTT4    |
| 784.1  | Charged multivesicular body prc  | 0.00E+00 | 6.75E+05 | 6.75E+05 | 6.75E+05 | NULL | AS | Q8WUX9   | CHMP7    |
| 1479.1 | Isoform 2 of Coiled-coil domain- | 0.00E+00 | 6.81E+05 | 6.81E+05 | 6.81E+05 | NULL | AS | Q8IXS2-2 | CCDC65   |
| 1509.1 | Epsin-2                          | 0.00E+00 | 6.84E+05 | 6.84E+05 | 6.84E+05 | NULL | AS | O95208   | EPN2     |
| 2009.1 | Isoform 2 of Mitochondrial inne  | 0.00E+00 | 6.84E+05 | 6.84E+05 | 6.84E+05 | NULL | AS | Q8N8Q8-2 | COX18    |
| 1666.1 | Dipeptidyl aminopeptidase-like   | 0.00E+00 | 6.93E+05 | 6.93E+05 | 6.93E+05 | NULL | AS | P42658   | DPP6     |
| 2510.1 | Rho guanine nucleotide exchanç   | 0.00E+00 | 6.97E+05 | 6.97E+05 | 6.97E+05 | NULL | AS | Q8TER5   | ARHGEF40 |
| 3168.1 | Isoform 3 of Centromere protei   | 0.00E+00 | 6.99E+05 | 6.99E+05 | 6.99E+05 | NULL | AS | Q96H22-3 | CENPN    |
| 3260.1 | Cytosolic 10-formyltetrahydrofc  | 0.00E+00 | 7.00E+05 | 7.00E+05 | 7.00E+05 | NULL | AS | O75891   | ALDH1L1  |
| 828.1  | Down syndrome cell adhesion n    | 0.00E+00 | 7.01E+05 | 7.01E+05 | 7.01E+05 | NULL | AS | Q8TD84   | DSCAML1  |
| 693.1  | Transcription termination factor | 0.00E+00 | 7.04E+05 | 7.04E+05 | 7.04E+05 | NULL | AS | Q9UNY4   | TTF2     |
| 60.2   | Protein RBM14-RBM4               | 0.00E+00 | 7.04E+05 | 7.04E+05 | 7.04E+05 | NULL | AS | Q96PK6   | RBM14    |
| 1402.1 | Periplakin                       | 0.00E+00 | 7.05E+05 | 7.05E+05 | 7.05E+05 | NULL | AS | O60437   | PPL      |
| 2150.1 | F-box only protein 43            | 0.00E+00 | 7.06E+05 | 7.06E+05 | 7.06E+05 | NULL | AS | Q4G163   | FBXO43   |
| 2073.1 | Pleckstrin homology domain-coi   | 0.00E+00 | 7.07E+05 | 7.07E+05 | 7.07E+05 | NULL | AS | Q6ZR37   | PLEKHG7  |
| 994.1  | ATP-binding cassette sub-famil   | 0.00E+00 | 7.08E+05 | 7.08E+05 | 7.08E+05 | NULL | AS | Q86UQ4   | ABCA13   |
| 1378.1 | DNA polymerase delta subunit 2   | 0.00E+00 | 7.10E+05 | 7.10E+05 | 7.10E+05 | NULL | AS | P49005   | POLD2    |
| 1593.1 | Chromodomain-helicase-DNA-b      | 0.00E+00 | 7.11E+05 | 7.11E+05 | 7.11E+05 | NULL | AS | Q9HCK8   | CHD8     |
| 2102.1 | UPF0505 protein C16orf62         | 0.00E+00 | 7.11E+05 | 7.11E+05 | 7.11E+05 | NULL | AS | E7EWW0   | C16orf62 |
| 3000.1 | Usher syndrome type-1G protei    | 0.00E+00 | 7.11E+05 | 7.11E+05 | 7.11E+05 | NULL | AS | J3KSN5   | USH1G    |
| 2900.1 | Retinol dehydrogenase 12         | 0.00E+00 | 7.16E+05 | 7.16E+05 | 7.16E+05 | NULL | AS | Q96NR8   | RDH12    |



|                                         |          |          |          |          |      |    |          |          |
|-----------------------------------------|----------|----------|----------|----------|------|----|----------|----------|
| 24.3 Tubulin alpha-3C/D chain           | 0.00E+00 | 7.23E+05 | 7.23E+05 | 7.23E+05 | NULL | AS | Q13748   | TUBA3C   |
| 2396.1 Lysine-specific demethylase 7    | 0.00E+00 | 7.26E+05 | 7.26E+05 | 7.26E+05 | NULL | AS | Q6ZMT4   | JHDM1D   |
| 1978.1 Bcl2 antagonist of cell death    | 0.00E+00 | 7.27E+05 | 7.27E+05 | 7.27E+05 | NULL | AS | F5GYS3   | BAD      |
| 3123.1 Isoform 2 of Sphingosine kinase  | 0.00E+00 | 7.27E+05 | 7.27E+05 | 7.27E+05 | NULL | AS | Q9NYA1-2 | SPHK1    |
| 1370.1 NADH dehydrogenase [ubiquinc     | 0.00E+00 | 7.29E+05 | 7.29E+05 | 7.29E+05 | NULL | AS | P51970   | NDUFA8   |
| 991.1 CCR4-NOT transcription comple     | 0.00E+00 | 7.30E+05 | 7.30E+05 | 7.30E+05 | NULL | AS | A5YKK6   | CNOT1    |
| 1002.1 Glutamate receptor ionotropic,   | 0.00E+00 | 7.36E+05 | 7.36E+05 | 7.36E+05 | NULL | AS | O60391   | GRIN3B   |
| 2825.1 Immunoglobulin superfamily DC    | 0.00E+00 | 7.36E+05 | 7.36E+05 | 7.36E+05 | NULL | AS | Q8TDY8   | IGDCC4   |
| 1231.1 Ryanodine receptor 2             | 0.00E+00 | 7.39E+05 | 7.39E+05 | 7.39E+05 | NULL | AS | H7BY35   | RYR2     |
| 791.1 39S ribosomal protein L33, mito   | 0.00E+00 | 7.40E+05 | 7.40E+05 | 7.40E+05 | NULL | AS | O75394   | MRPL33   |
| 1513.1 Multiple epidermal growth fact   | 0.00E+00 | 7.47E+05 | 7.47E+05 | 7.47E+05 | NULL | AS | Q7Z7M0   | MEGF8    |
| 1416.1 Huntingtin-interacting protein 1 | 0.00E+00 | 7.51E+05 | 7.51E+05 | 7.51E+05 | NULL | AS | O75146   | HIP1R    |
| 600.1 Cathepsin B                       | 0.00E+00 | 7.55E+05 | 7.55E+05 | 7.55E+05 | NULL | AS | P07858   | CTSB     |
| 1751.1 Isoform 3 of Neutrophil cytosol  | 0.00E+00 | 7.57E+05 | 7.57E+05 | 7.57E+05 | NULL | AS | Q15080-3 | NCF4     |
| 2430.1 Stabilin-2                       | 0.00E+00 | 7.57E+05 | 7.57E+05 | 7.57E+05 | NULL | AS | Q8WWQ8   | STAB2    |
| 1043.1 Kelch domain-containing protei   | 0.00E+00 | 7.58E+05 | 7.58E+05 | 7.58E+05 | NULL | AS | Q8IYD2   | KLHDC8A  |
| 2792.1 TPR and ankyrin repeat-containi  | 0.00E+00 | 7.58E+05 | 7.58E+05 | 7.58E+05 | NULL | AS | O15050   | TRANK1   |
| 3022.1 Isoform 9 of DEP domain-contai   | 0.00E+00 | 7.78E+05 | 7.78E+05 | 7.78E+05 | NULL | AS | O75140-9 | DEPDC5   |
| 1016.1 Probable E3 ubiquitin-protein li | 0.00E+00 | 7.82E+05 | 7.82E+05 | 7.82E+05 | NULL | AS | Q8IVU3   | HERC6    |
| 1249.1 Type 2 lactosamine alpha-2,3-si  | 0.00E+00 | 7.85E+05 | 7.85E+05 | 7.85E+05 | NULL | AS | Q9Y274   | ST3GAL6  |
| 1788.1 Galactose-3-O-sulfotransferase   | 0.00E+00 | 7.86E+05 | 7.86E+05 | 7.86E+05 | NULL | AS | Q9H3Q3   | GAL3ST2  |
| 712.1 Double-strand break repair prot   | 0.00E+00 | 7.87E+05 | 7.87E+05 | 7.87E+05 | NULL | AS | B3KTC7   | MRE11A   |
| 1648.1 PCNA-interacting partner         | 0.00E+00 | 7.87E+05 | 7.87E+05 | 7.87E+05 | NULL | AS | B4DZ31   | PARPBP   |
| 2000.1 E3 ubiquitin-protein ligase BRE1 | 0.00E+00 | 7.88E+05 | 7.88E+05 | 7.88E+05 | NULL | AS | O75150   | RNF40    |
| 2051.1 Arf-GAP with GTPase, ANK repe    | 0.00E+00 | 7.89E+05 | 7.89E+05 | 7.89E+05 | NULL | AS | Q99490   | AGAP2    |
| 536.1 Histone H1t                       | 0.00E+00 | 7.91E+05 | 7.91E+05 | 7.91E+05 | NULL | AS | P22492   | HIST1H1T |
| 1896.1 Protocadherin-15                 | 0.00E+00 | 7.94E+05 | 7.94E+05 | 7.94E+05 | NULL | AS | E7EMG8   | PCDH15   |
| 869.1 ATP synthase subunit O, mitoch    | 0.00E+00 | 7.96E+05 | 7.96E+05 | 7.96E+05 | NULL | AS | P48047   | ATP5O    |
| 76.2 Heterogeneous nuclear ribonuc      | 0.00E+00 | 7.99E+05 | 7.99E+05 | 7.99E+05 | NULL | AS | P55795   | HNRNPH2  |
| 314.1 Isoform 2 of Hydroxyacyl-coenz    | 0.00E+00 | 8.01E+05 | 8.01E+05 | 8.01E+05 | NULL | AS | Q16836-2 | HADH     |
| 397.1 Nuclear pore complex protein N    | 0.00E+00 | 8.06E+05 | 8.06E+05 | 8.06E+05 | NULL | AS | Q99567   | NUP88    |
| 2140.1 Galactose-3-O-sulfotransferase   | 0.00E+00 | 8.06E+05 | 8.06E+05 | 8.06E+05 | NULL | AS | Q96A11   | GAL3ST3  |
| 1407.1 Isoform 3 of E3 ubiquitin-protei | 0.00E+00 | 8.09E+05 | 8.09E+05 | 8.09E+05 | NULL | AS | Q14669-3 | TRIP12   |
| 375.1 Plasminogen activator inhibitor   | 0.00E+00 | 8.10E+05 | 8.10E+05 | 8.10E+05 | NULL | AS | Q8NC51   | SERBP1   |
| 2010.1 Tigger transposable element-de   | 0.00E+00 | 8.21E+05 | 8.21E+05 | 8.21E+05 | NULL | AS | Q96MW7   | TIGD1    |

|        |                                    |          |          |          |          |      |    |          |          |
|--------|------------------------------------|----------|----------|----------|----------|------|----|----------|----------|
| 912.1  | Growth/differentiation factor 1!   | 0.00E+00 | 8.23E+05 | 8.23E+05 | 8.23E+05 | NULL | AS | Q99988   | GDF15    |
| 2748.1 | MAX gene-associated protein        | 0.00E+00 | 8.33E+05 | 8.33E+05 | 8.33E+05 | NULL | AS | Q8IWI9   | MGA      |
| 1799.1 | Endonuclease III-like protein 1    | 0.00E+00 | 8.39E+05 | 8.39E+05 | 8.39E+05 | NULL | AS | P78549   | NTHL1    |
| 1952.1 | Protein TBRG4                      | 0.00E+00 | 8.39E+05 | 8.39E+05 | 8.39E+05 | NULL | AS | Q969Z0   | TBRG4    |
| 2326.1 | Urocanate hydratase                | 0.00E+00 | 8.40E+05 | 8.40E+05 | 8.40E+05 | NULL | AS | Q96N76   | UROC1    |
| 1651.1 | Peroxisomal biogenesis factor 1    | 0.00E+00 | 8.44E+05 | 8.44E+05 | 8.44E+05 | NULL | AS | B7Z8B3   | PEX19    |
| 2518.1 | Transient receptor potential cat   | 0.00E+00 | 8.44E+05 | 8.44E+05 | 8.44E+05 | NULL | AS | Q7Z2W7   | TRPM8    |
| 308.1  | Serine/arginine-rich splicing fact | 0.00E+00 | 8.50E+05 | 8.50E+05 | 8.50E+05 | NULL | AS | Q13247   | SRSF6    |
| 437.1  | Heterogeneous nuclear ribonuc      | 0.00E+00 | 8.50E+05 | 8.50E+05 | 8.50E+05 | NULL | AS | Q13151   | HNRNPA0  |
| 3126.1 | Ral GTPase-activating protein su   | 0.00E+00 | 8.55E+05 | 8.55E+05 | 8.55E+05 | NULL | AS | Q86X10   | RALGAPB  |
| 429.1  | 40S ribosomal protein S8           | 0.00E+00 | 8.60E+05 | 8.60E+05 | 8.60E+05 | NULL | AS | P62241   | RPS8     |
| 3174.1 | Isoform 2 of Ubiquitin carboxyl-   | 0.00E+00 | 8.60E+05 | 8.60E+05 | 8.60E+05 | NULL | AS | Q9P275-2 | USP36    |
| 1894.1 | Chromosome 1 open reading fra      | 0.00E+00 | 8.61E+05 | 8.61E+05 | 8.61E+05 | NULL | AS | J3KQM5   | NULL     |
| 3002.1 | Coiled-coil domain-containing p    | 0.00E+00 | 8.62E+05 | 8.62E+05 | 8.62E+05 | NULL | AS | Q5T655   | CCDC147  |
| 2877.1 | Tetratricopeptide repeat protei    | 0.00E+00 | 8.66E+05 | 8.66E+05 | 8.66E+05 | NULL | AS | Q7Z4L5   | TTC21B   |
| 2139.1 | Laminin subunit alpha-2            | 0.00E+00 | 8.67E+05 | 8.67E+05 | 8.67E+05 | NULL | AS | P24043   | LAMA2    |
| 2317.1 | Protein NLRC5                      | 0.00E+00 | 8.67E+05 | 8.67E+05 | 8.67E+05 | NULL | AS | Q86WI3   | NLRC5    |
| 1483.1 | Enhancer of polycomb homolog       | 0.00E+00 | 8.70E+05 | 8.70E+05 | 8.70E+05 | NULL | AS | Q9H2F5   | EPC1     |
| 539.1  | Chromosome transmission fidel      | 0.00E+00 | 8.73E+05 | 8.73E+05 | 8.73E+05 | NULL | AS | P0CG12   | CHTF8    |
| 69.2   | ATP-dependent RNA helicase DI      | 0.00E+00 | 8.78E+05 | 8.78E+05 | 8.78E+05 | NULL | AS | O00148   | DDX39A   |
| 1382.1 | Immunoglobulin iota chain          | 0.00E+00 | 8.82E+05 | 8.82E+05 | 8.82E+05 | NULL | AS | P12018   | VPREB1   |
| 335.1  | Citrate synthase, mitochondrial    | 0.00E+00 | 8.87E+05 | 8.87E+05 | 8.87E+05 | NULL | AS | O75390   | CS       |
| 2178.1 | Thioredoxin-related transmemb      | 0.00E+00 | 8.89E+05 | 8.89E+05 | 8.89E+05 | NULL | AS | Q9H3N1   | TMX1     |
| 2378.1 | Protein FAM22F                     | 0.00E+00 | 8.92E+05 | 8.92E+05 | 8.92E+05 | NULL | AS | A1L443   | NUTM2F   |
| 988.1  | Serine/threonine-protein kinase    | 0.00E+00 | 8.96E+05 | 8.96E+05 | 8.96E+05 | NULL | AS | O14757   | CHEK1    |
| 3070.1 | BUD13 homolog                      | 0.00E+00 | 8.96E+05 | 8.96E+05 | 8.96E+05 | NULL | AS | Q9BRD0   | BUD13    |
| 825.1  | Sulfotransferase 1A2               | 0.00E+00 | 9.05E+05 | 9.05E+05 | 9.05E+05 | NULL | AS | P50226   | SULT1A2  |
| 2274.1 | Ras-related protein Rab-27B        | 0.00E+00 | 9.17E+05 | 9.17E+05 | 9.17E+05 | NULL | AS | O00194   | RAB27B   |
| 3105.1 | PiggyBac transposable element      | 0.00E+00 | 9.18E+05 | 9.18E+05 | 9.18E+05 | NULL | AS | J3KNK5   | PGBD5    |
| 654.1  | Dynein heavy chain 7, axonemal     | 0.00E+00 | 9.25E+05 | 9.25E+05 | 9.25E+05 | NULL | AS | Q8WXX0   | DNAH7    |
| 1395.1 | THUMP domain-containing prot       | 0.00E+00 | 9.27E+05 | 9.27E+05 | 9.27E+05 | NULL | AS | Q9BTF0   | THUMPD2  |
| 351.1  | U5 small nuclear ribonucleoprot    | 0.00E+00 | 9.39E+05 | 9.39E+05 | 9.39E+05 | NULL | AS | O75643   | SNRNP200 |
| 393.1  | 60S ribosomal protein L34          | 0.00E+00 | 9.46E+05 | 9.46E+05 | 9.46E+05 | NULL | AS | P49207   | RPL34    |
| 798.1  | FRAS1-related extracellular mat    | 0.00E+00 | 9.47E+05 | 9.47E+05 | 9.47E+05 | NULL | AS | Q5SZK8   | FREM2    |
| 953.1  | Isoform 2 of Septin-2              | 0.00E+00 | 9.66E+05 | 9.66E+05 | 9.66E+05 | NULL | AS | Q15019-2 | SEPT2    |

|        |                                  |          |          |          |          |      |    |          |          |
|--------|----------------------------------|----------|----------|----------|----------|------|----|----------|----------|
| 419.1  | Isoform 2 of Aminoacyl tRNA sy   | 0.00E+00 | 9.67E+05 | 9.67E+05 | 9.67E+05 | NULL | AS | Q12904-2 | AIMP1    |
| 1777.1 | Serine/threonine-protein phosph  | 0.00E+00 | 9.75E+05 | 9.75E+05 | 9.75E+05 | NULL | AS | Q06190   | PPP2R3A  |
| 1773.1 | Integrin alpha-4                 | 0.00E+00 | 9.78E+05 | 9.78E+05 | 9.78E+05 | NULL | AS | P13612   | ITGA4    |
| 1574.1 | WD repeat-containing protein 4   | 0.00E+00 | 9.80E+05 | 9.80E+05 | 9.80E+05 | NULL | AS | Q8TAF3   | WDR48    |
| 3208.1 | Integrator complex subunit 3     | 0.00E+00 | 9.86E+05 | 9.86E+05 | 9.86E+05 | NULL | AS | Q68E01   | INTS3    |
| 1701.1 | Zinc finger protein 468          | 0.00E+00 | 9.94E+05 | 9.94E+05 | 9.94E+05 | NULL | AS | Q5VIY5   | ZNF468   |
| 732.1  | Enhancer of yellow 2 transcripti | 0.00E+00 | 1.00E+06 | 1.00E+06 | 1.00E+06 | NULL | AS | Q9NPA8   | ENY2     |
| 590.1  | Heterogeneous nuclear ribonuc    | 0.00E+00 | 1.01E+06 | 1.01E+06 | 1.01E+06 | NULL | AS | P51991   | HNRNPA3  |
| 665.1  | Isoform 2 of Acid ceramidase     | 0.00E+00 | 1.01E+06 | 1.01E+06 | 1.01E+06 | NULL | AS | Q13510-2 | ASAH1    |
| 2506.1 | Growth hormone-regulated TBC     | 0.00E+00 | 1.01E+06 | 1.01E+06 | 1.01E+06 | NULL | AS | Q5TC63   | GRTP1    |
| 909.1  | Protein FAM207A                  | 0.00E+00 | 1.02E+06 | 1.02E+06 | 1.02E+06 | NULL | AS | Q9NSI2   | FAM207A  |
| 976.1  | Glycylpeptide N-tetradecanoyltr  | 0.00E+00 | 1.03E+06 | 1.03E+06 | 1.03E+06 | NULL | AS | P30419   | NMT1     |
| 2755.1 | Isoform 3 of Calmodulin-regulat  | 0.00E+00 | 1.03E+06 | 1.03E+06 | 1.03E+06 | NULL | AS | Q5T5Y3-3 | CAMSAP1  |
| 857.1  | U6 snRNA-associated Sm-like pr   | 0.00E+00 | 1.04E+06 | 1.04E+06 | 1.04E+06 | NULL | AS | P62310   | LSM3     |
| 881.1  | Discs, large homolog 3 (Neuroer  | 0.00E+00 | 1.05E+06 | 1.05E+06 | 1.05E+06 | NULL | AS | Q5JUW8   | DLG3     |
| 2693.1 | Thioredoxin domain-containing    | 0.00E+00 | 1.05E+06 | 1.05E+06 | 1.05E+06 | NULL | AS | Q8N427   | NME8     |
| 796.1  | ATP-dependent RNA helicase Dh    | 0.00E+00 | 1.06E+06 | 1.06E+06 | 1.06E+06 | NULL | AS | Q7Z478   | DHX29    |
| 2356.1 | Isoform 2 of Alcohol dehydroge   | 0.00E+00 | 1.06E+06 | 1.06E+06 | 1.06E+06 | NULL | AS | P40394-2 | ADH7     |
| 2644.1 | 1-phosphatidylinositol 4,5-bisph | 0.00E+00 | 1.06E+06 | 1.06E+06 | 1.06E+06 | NULL | AS | Q9NQ66   | PLCB1    |
| 1280.1 | Isoform 2 of Bifunctional coenzy | 0.00E+00 | 1.07E+06 | 1.07E+06 | 1.07E+06 | NULL | AS | Q13057-2 | COASY    |
| 1478.1 | Putative Polycomb group protei   | 0.00E+00 | 1.07E+06 | 1.07E+06 | 1.07E+06 | NULL | AS | Q76L83   | ASXL2    |
| 3016.1 | Zinc finger protein 154          | 0.00E+00 | 1.07E+06 | 1.07E+06 | 1.07E+06 | NULL | AS | Q13106   | ZNF154   |
| 1645.1 | Heat shock 70 kDa protein 4L     | 0.00E+00 | 1.08E+06 | 1.08E+06 | 1.08E+06 | NULL | AS | E7ES43   | HSPA4L   |
| 1973.1 | Isoform 7 of CCR4-NOT transcrip  | 0.00E+00 | 1.08E+06 | 1.08E+06 | 1.08E+06 | NULL | AS | O95628-7 | CNOT4    |
| 2608.1 | Tubby-related protein 4          | 0.00E+00 | 1.10E+06 | 1.10E+06 | 1.10E+06 | NULL | AS | Q9NRJ4   | TULP4    |
| 2695.1 | Serine/threonine-protein kinase  | 0.00E+00 | 1.10E+06 | 1.10E+06 | 1.10E+06 | NULL | AS | O00444   | PLK4     |
| 459.1  | Ras GTPase-activating-like prote | 0.00E+00 | 1.11E+06 | 1.11E+06 | 1.11E+06 | NULL | AS | P46940   | IQGAP1   |
| 1612.1 | Matrix metalloproteinase-26      | 0.00E+00 | 1.11E+06 | 1.11E+06 | 1.11E+06 | NULL | AS | Q9NRE1   | MMP26    |
| 597.1  | Putative 40S ribosomal protein   | 0.00E+00 | 1.12E+06 | 1.12E+06 | 1.12E+06 | NULL | AS | Q5JNZ5   | RPS26P11 |
| 834.1  | Mitochondrial import inner mer   | 0.00E+00 | 1.12E+06 | 1.12E+06 | 1.12E+06 | NULL | AS | O60220   | TIMM8A   |
| 1130.1 | Alpha-fetoprotein                | 0.00E+00 | 1.12E+06 | 1.12E+06 | 1.12E+06 | NULL | AS | J3KMX3   | AFP      |
| 3191.1 | Laminin subunit gamma-1          | 0.00E+00 | 1.12E+06 | 1.12E+06 | 1.12E+06 | NULL | AS | P11047   | LAMC1    |
| 730.1  | V-type proton ATPase subunit D   | 0.00E+00 | 1.13E+06 | 1.13E+06 | 1.13E+06 | NULL | AS | Q9Y5K8   | ATP6V1D  |
| 918.1  | Transformer-2 protein homolog    | 0.00E+00 | 1.13E+06 | 1.13E+06 | 1.13E+06 | NULL | AS | P62995   | TRA2B    |
| 386.1  | Mitotic checkpoint protein BUB:  | 0.00E+00 | 1.14E+06 | 1.14E+06 | 1.14E+06 | NULL | AS | O43684   | BUB3     |

|        |                                   |          |          |          |          |      |    |          |         |
|--------|-----------------------------------|----------|----------|----------|----------|------|----|----------|---------|
| 882.1  | Ran GTPase-activating protein 1   | 0.00E+00 | 1.14E+06 | 1.14E+06 | 1.14E+06 | NULL | AS | P46060   | RANGAP1 |
| 507.1  | Transportin-1                     | 0.00E+00 | 1.15E+06 | 1.15E+06 | 1.15E+06 | NULL | AS | Q92973   | TNPO1   |
| 423.1  | Isoform Beta of Nucleolar and c   | 0.00E+00 | 1.16E+06 | 1.16E+06 | 1.16E+06 | NULL | AS | Q14978-2 | NOLC1   |
| 1095.1 | Ubiquitin-like protein 5          | 0.00E+00 | 1.16E+06 | 1.16E+06 | 1.16E+06 | NULL | AS | Q9BZL1   | UBL5    |
| 1207.1 | GATA zinc finger domain contain   | 0.00E+00 | 1.16E+06 | 1.16E+06 | 1.16E+06 | NULL | AS | B5MC40   | GATAD2A |
| 859.1  | Synaptic vesicle membrane prot    | 0.00E+00 | 1.17E+06 | 1.17E+06 | 1.17E+06 | NULL | AS | Q99536   | VAT1    |
| 934.1  | Cyclic AMP-dependent transcrip    | 0.00E+00 | 1.17E+06 | 1.17E+06 | 1.17E+06 | NULL | AS | P18850   | ATF6    |
| 1338.1 | E3 ubiquitin-protein ligase TRIM  | 0.00E+00 | 1.17E+06 | 1.17E+06 | 1.17E+06 | NULL | AS | Q6AZZ1   | TRIM68  |
| 1613.1 | T-cell receptor delta chain C reg | 0.00E+00 | 1.17E+06 | 1.17E+06 | 1.17E+06 | NULL | AS | B7Z8K6   | TRDC    |
| 2332.1 | E3 ubiquitin-protein ligase CBL   | 0.00E+00 | 1.17E+06 | 1.17E+06 | 1.17E+06 | NULL | AS | P22681   | CBL     |
| 452.1  | 40S ribosomal protein S27         | 0.00E+00 | 1.18E+06 | 1.18E+06 | 1.18E+06 | NULL | AS | H0YMV8   | RPS27L  |
| 547.1  | Isoform 2 of Cytochrome c oxidase | 0.00E+00 | 1.18E+06 | 1.18E+06 | 1.18E+06 | NULL | AS | Q5JTJ3-2 | COA6    |
| 594.1  | Coronin-1B                        | 0.00E+00 | 1.18E+06 | 1.18E+06 | 1.18E+06 | NULL | AS | Q9BR76   | CORO1B  |
| 1640.1 | Protein FAM221A                   | 0.00E+00 | 1.18E+06 | 1.18E+06 | 1.18E+06 | NULL | AS | A4D161   | FAM221A |
| 1738.1 | Sterol 26-hydroxylase, mitochor   | 0.00E+00 | 1.18E+06 | 1.18E+06 | 1.18E+06 | NULL | AS | Q02318   | CYP27A1 |
| 2494.1 | Olfactory receptor 51B4           | 0.00E+00 | 1.18E+06 | 1.18E+06 | 1.18E+06 | NULL | AS | Q9Y5P0   | OR51B4  |
| 2591.1 | Treslin                           | 0.00E+00 | 1.18E+06 | 1.18E+06 | 1.18E+06 | NULL | AS | Q7Z2Z1   | TICRR   |
| 544.1  | Nucleolar protein 56              | 0.00E+00 | 1.19E+06 | 1.19E+06 | 1.19E+06 | NULL | AS | O00567   | NOP56   |
| 1482.1 | Utrophin                          | 0.00E+00 | 1.19E+06 | 1.19E+06 | 1.19E+06 | NULL | AS | P46939   | UTRN    |
| 1459.1 | Protein phosphatase 1 regulator   | 0.00E+00 | 1.20E+06 | 1.20E+06 | 1.20E+06 | NULL | AS | Q86X16   | PPP1R3B |
| 1540.1 | Neuralized-like protein 4         | 0.00E+00 | 1.21E+06 | 1.21E+06 | 1.21E+06 | NULL | AS | Q96JN8   | NEURL4  |
| 411.1  | Short/branched chain specific ar  | 0.00E+00 | 1.23E+06 | 1.23E+06 | 1.23E+06 | NULL | AS | P45954   | ACADSB  |
| 1365.1 | SUN domain-containing protein     | 0.00E+00 | 1.24E+06 | 1.24E+06 | 1.24E+06 | NULL | AS | A4D2Q0   | UNC84A  |
| 2155.1 | Zinc finger MYM-type protein 6    | 0.00E+00 | 1.25E+06 | 1.25E+06 | 1.25E+06 | NULL | AS | O95789   | ZMYM6   |
| 1879.1 | Tripartite motif-containing prot  | 0.00E+00 | 1.29E+06 | 1.29E+06 | 1.29E+06 | NULL | AS | B5MCJ9   | TRIM66  |
| 620.1  | Eukaryotic translation initiation | 0.00E+00 | 1.30E+06 | 1.30E+06 | 1.30E+06 | NULL | AS | Q9BY44   | EIF2A   |
| 2101.1 | Hepatocyte nuclear factor 1-beta  | 0.00E+00 | 1.30E+06 | 1.30E+06 | 1.30E+06 | NULL | AS | P35680   | HNF1B   |
| 2840.1 | Zinc finger protein 224           | 0.00E+00 | 1.32E+06 | 1.32E+06 | 1.32E+06 | NULL | AS | Q9NZL3   | ZNF224  |
| 1610.1 | Catalase                          | 0.00E+00 | 1.33E+06 | 1.33E+06 | 1.33E+06 | NULL | AS | P04040   | CAT     |
| 661.1  | 60S ribosomal protein L21         | 0.00E+00 | 1.34E+06 | 1.34E+06 | 1.34E+06 | NULL | AS | P46778   | RPL21   |
| 1541.1 | Zinc finger CCCH domain-contain   | 0.00E+00 | 1.35E+06 | 1.35E+06 | 1.35E+06 | NULL | AS | Q8IWRO   | ZC3H7A  |
| 2786.1 | Trinucleotide repeat-containing   | 0.00E+00 | 1.36E+06 | 1.36E+06 | 1.36E+06 | NULL | AS | O15417   | TNRC18  |
| 501.1  | 60S ribosomal protein L10         | 0.00E+00 | 1.41E+06 | 1.41E+06 | 1.41E+06 | NULL | AS | P27635   | RPL10   |
| 344.1  | Eukaryotic translation initiation | 0.00E+00 | 1.43E+06 | 1.43E+06 | 1.43E+06 | NULL | AS | O15371   | EIF3D   |
| 640.1  | 14 kDa phosphohistidine phosph    | 0.00E+00 | 1.46E+06 | 1.46E+06 | 1.46E+06 | NULL | AS | Q9NRX4   | PHPT1   |

|        |                                                 |          |          |          |          |      |    |          |          |
|--------|-------------------------------------------------|----------|----------|----------|----------|------|----|----------|----------|
| 977.1  | Lysophospholipase-like protein                  | 0.00E+00 | 1.48E+06 | 1.48E+06 | 1.48E+06 | NULL | AS | Q5VWZ2   | LYPLAL1  |
| 1443.1 | Isoform 3 of Collagen type IV alpha             | 0.00E+00 | 1.48E+06 | 1.48E+06 | 1.48E+06 | NULL | AS | Q9Y5P4-3 | COL4A3BP |
| 1022.1 | Putative SAGE1-like protein                     | 0.00E+00 | 1.50E+06 | 1.50E+06 | 1.50E+06 | NULL | AS | A6NJ88   | SGE1L    |
| 2714.1 | Zinc finger Ran-binding domain-                 | 0.00E+00 | 1.51E+06 | 1.51E+06 | 1.51E+06 | NULL | AS | O95218   | ZRANB2   |
| 2224.1 | Nck-associated protein 5                        | 0.00E+00 | 1.53E+06 | 1.53E+06 | 1.53E+06 | NULL | AS | O14513   | NCKAP5   |
| 1877.1 | Erlin-1                                         | 0.00E+00 | 1.56E+06 | 1.56E+06 | 1.56E+06 | NULL | AS | O75477   | ERLIN1   |
| 1294.1 | Diphosphoinositol polyphosphatase               | 0.00E+00 | 1.57E+06 | 1.57E+06 | 1.57E+06 | NULL | AS | O95989   | NUDT3    |
| 440.1  | Serine/arginine-rich-splicing factor            | 0.00E+00 | 1.59E+06 | 1.59E+06 | 1.59E+06 | NULL | AS | J3KTL2   | SRSF1    |
| 766.1  | Hypermethylated in cancer 2 protein             | 0.00E+00 | 1.61E+06 | 1.61E+06 | 1.61E+06 | NULL | AS | Q96JB3   | HIC2     |
| 480.1  | 60S ribosomal protein L29                       | 0.00E+00 | 1.62E+06 | 1.62E+06 | 1.62E+06 | NULL | AS | P47914   | RPL29    |
| 1712.1 | Zinc finger and BTB domain-containing           | 0.00E+00 | 1.63E+06 | 1.63E+06 | 1.63E+06 | NULL | AS | Q86UZ6   | ZBTB46   |
| 2236.1 | Signal recognition particle receptor            | 0.00E+00 | 1.68E+06 | 1.68E+06 | 1.68E+06 | NULL | AS | Q9Y5M8   | SRPRB    |
| 169.3  | Keratin, type I cytoskeletal 27                 | 0.00E+00 | 1.73E+06 | 1.73E+06 | 1.73E+06 | NULL | AS | Q7Z3Y8   | KRT27    |
| 1197.1 | EF-hand calcium-binding domain                  | 0.00E+00 | 1.74E+06 | 1.74E+06 | 1.74E+06 | NULL | AS | Q5THR3   | EFCAB6   |
| 2600.1 | Coiled-coil domain-containing protein           | 0.00E+00 | 1.74E+06 | 1.74E+06 | 1.74E+06 | NULL | AS | Q96MC2   | DRC1     |
| 342.1  | Isoform 3 of Cleavage and polyadenylation       | 0.00E+00 | 1.75E+06 | 1.75E+06 | 1.75E+06 | NULL | AS | Q8N684-3 | CPSF7    |
| 407.1  | RNA-binding protein 12B                         | 0.00E+00 | 1.77E+06 | 1.77E+06 | 1.77E+06 | NULL | AS | Q8IXT5   | RBM12B   |
| 2940.1 | Tryptophan 2,3-dioxygenase                      | 0.00E+00 | 1.80E+06 | 1.80E+06 | 1.80E+06 | NULL | AS | P48775   | TDO2     |
| 746.1  | 40S ribosomal protein S23                       | 0.00E+00 | 1.81E+06 | 1.81E+06 | 1.81E+06 | NULL | AS | P62266   | RPS23    |
| 341.1  | Pyrroline-5-carboxylate reductase               | 0.00E+00 | 1.83E+06 | 1.83E+06 | 1.83E+06 | NULL | AS | B4DMU0   | PYCR1    |
| 422.1  | 60S ribosomal protein L27a                      | 0.00E+00 | 1.83E+06 | 1.83E+06 | 1.83E+06 | NULL | AS | P46776   | RPL27A   |
| 373.1  | Plakophilin-3                                   | 0.00E+00 | 1.84E+06 | 1.84E+06 | 1.84E+06 | NULL | AS | Q9Y446   | PKP3     |
| 506.1  | Vigilin                                         | 0.00E+00 | 1.88E+06 | 1.88E+06 | 1.88E+06 | NULL | AS | Q00341   | HDLBP    |
| 3149.1 | Liprin-alpha-2                                  | 0.00E+00 | 1.88E+06 | 1.88E+06 | 1.88E+06 | NULL | AS | F8VWG6   | PPFIA2   |
| 900.1  | Protein syndesmos                               | 0.00E+00 | 1.94E+06 | 1.94E+06 | 1.94E+06 | NULL | AS | Q9BRJ7   | NUDT16L1 |
| 1433.1 | Isoform 4 of Vacuolar protein sorting           | 0.00E+00 | 1.95E+06 | 1.95E+06 | 1.95E+06 | NULL | AS | Q5VIR6-4 | VPS53    |
| 475.1  | Isoform 2 of Ferrochelatase, mitochondrial      | 0.00E+00 | 1.96E+06 | 1.96E+06 | 1.96E+06 | NULL | AS | P22830-2 | FECH     |
| 1936.1 | Zinc finger and BTB domain-containing           | 0.00E+00 | 1.96E+06 | 1.96E+06 | 1.96E+06 | NULL | AS | O15062   | ZBTB5    |
| 3113.1 | Transmembrane protein 143                       | 0.00E+00 | 1.96E+06 | 1.96E+06 | 1.96E+06 | NULL | AS | B4DMT0   | TMEM143  |
| 529.1  | Isoform 2 of Chromodomain-helicase              | 0.00E+00 | 1.97E+06 | 1.97E+06 | 1.97E+06 | NULL | AS | Q14839-2 | CHD4     |
| 891.1  | WW domain-binding protein 11                    | 0.00E+00 | 2.01E+06 | 2.01E+06 | 2.01E+06 | NULL | AS | Q9Y2W2   | WBP11    |
| 340.1  | 60S ribosomal protein L15                       | 0.00E+00 | 2.03E+06 | 2.03E+06 | 2.03E+06 | NULL | AS | P61313   | RPL15    |
| 559.1  | N-acetylglucosamine-6-sulfatase                 | 0.00E+00 | 2.06E+06 | 2.06E+06 | 2.06E+06 | NULL | AS | F6S8M0   | GNS      |
| 447.1  | 60S ribosomal protein L23a                      | 0.00E+00 | 2.07E+06 | 2.07E+06 | 2.07E+06 | NULL | AS | A8MUS3   | RPL23A   |
| 916.1  | Isoform 2 of DNA (cytosine-5)-methyltransferase | 0.00E+00 | 2.09E+06 | 2.09E+06 | 2.09E+06 | NULL | AS | P26358-2 | DNMT1    |

|        |                                   |          |          |          |          |      |    |          |           |
|--------|-----------------------------------|----------|----------|----------|----------|------|----|----------|-----------|
| 817.1  | Nuclear pore complex protein N    | 0.00E+00 | 2.10E+06 | 2.10E+06 | 2.10E+06 | NULL | AS | P52948   | NUP98     |
| 531.1  | Septin-8                          | 0.00E+00 | 2.12E+06 | 2.12E+06 | 2.12E+06 | NULL | AS | Q92599   | SEPT8     |
| 2008.1 | Presenilin-1                      | 0.00E+00 | 2.18E+06 | 2.18E+06 | 2.18E+06 | NULL | AS | P49768   | PSEN1     |
| 742.1  | Activated RNA polymerase II tra   | 0.00E+00 | 2.21E+06 | 2.21E+06 | 2.21E+06 | NULL | AS | P53999   | SUB1      |
| 555.1  | Glucosidase 2 subunit beta        | 0.00E+00 | 2.22E+06 | 2.22E+06 | 2.22E+06 | NULL | AS | K7ELL7   | PRKCSH    |
| 790.1  | THO complex subunit 4             | 0.00E+00 | 2.22E+06 | 2.22E+06 | 2.22E+06 | NULL | AS | E9PB61   | ALYREF    |
| 333.1  | Specifically androgen-regulated   | 0.00E+00 | 2.23E+06 | 2.23E+06 | 2.23E+06 | NULL | AS | Q9BW04   | SARG      |
| 2383.1 | Serine/threonine-protein kinase   | 0.00E+00 | 2.24E+06 | 2.24E+06 | 2.24E+06 | NULL | AS | P0C263   | SBK2      |
| 850.1  | CWF19-like protein 2              | 0.00E+00 | 2.28E+06 | 2.28E+06 | 2.28E+06 | NULL | AS | Q2TBE0   | CWF19L2   |
| 832.1  | Importin subunit alpha            | 0.00E+00 | 2.31E+06 | 2.31E+06 | 2.31E+06 | NULL | AS | F5GYL8   | KPNA6     |
| 1621.1 | Serine/threonine-protein kinase   | 0.00E+00 | 2.31E+06 | 2.31E+06 | 2.31E+06 | NULL | AS | O00506   | STK25     |
| 432.1  | Eukaryotic translation initiation | 0.00E+00 | 2.34E+06 | 2.34E+06 | 2.34E+06 | NULL | AS | P20042   | EIF2S2    |
| 278.1  | 60S ribosomal protein L3          | 0.00E+00 | 2.37E+06 | 2.37E+06 | 2.37E+06 | NULL | AS | P39023   | RPL3      |
| 410.1  | DNA replication licensing factor  | 0.00E+00 | 2.37E+06 | 2.37E+06 | 2.37E+06 | NULL | AS | P33992   | MCM5      |
| 190.1  | Kinectin                          | 0.00E+00 | 2.39E+06 | 2.39E+06 | 2.39E+06 | NULL | AS | Q86UP2   | KTN1      |
| 707.1  | Aldehyde dehydrogenase X, mit     | 0.00E+00 | 2.40E+06 | 2.40E+06 | 2.40E+06 | NULL | AS | P30837   | ALDH1B1   |
| 392.1  | Selenoprotein H                   | 0.00E+00 | 2.42E+06 | 2.42E+06 | 2.42E+06 | NULL | AS | Q8IZQ5   | SELH      |
| 599.1  | Isoform 2 of Apoptosis inhibitor  | 0.00E+00 | 2.42E+06 | 2.42E+06 | 2.42E+06 | NULL | AS | Q9BZZ5-2 | API5      |
| 961.1  | Huntingtin                        | 0.00E+00 | 2.42E+06 | 2.42E+06 | 2.42E+06 | NULL | AS | P42858   | HTT       |
| 44.3   | Peroxiredoxin-4                   | 0.00E+00 | 2.45E+06 | 2.45E+06 | 2.45E+06 | NULL | AS | Q13162   | PRDX4     |
| 713.1  | Isoform 3 of Protein scribble ho  | 0.00E+00 | 2.46E+06 | 2.46E+06 | 2.46E+06 | NULL | AS | Q14160-3 | SCRIB     |
| 434.1  | Heterogeneous nuclear ribonuc     | 0.00E+00 | 2.48E+06 | 2.48E+06 | 2.48E+06 | NULL | AS | P31942   | HNRNPH3   |
| 359.1  | E3 ubiquitin/ISG15 ligase TRIM2   | 0.00E+00 | 2.52E+06 | 2.52E+06 | 2.52E+06 | NULL | AS | Q14258   | TRIM25    |
| 1493.1 | UPF0568 protein C14orf166         | 0.00E+00 | 2.53E+06 | 2.53E+06 | 2.53E+06 | NULL | AS | Q9Y224   | C14orf166 |
| 360.1  | ATP-dependent RNA helicase A      | 0.00E+00 | 2.55E+06 | 2.55E+06 | 2.55E+06 | NULL | AS | Q08211   | DHX9      |
| 703.1  | Protocadherin Fat 1               | 0.00E+00 | 2.56E+06 | 2.56E+06 | 2.56E+06 | NULL | AS | Q14517   | FAT1      |
| 842.1  | Isoform Beta-4B of Integrin beta  | 0.00E+00 | 2.56E+06 | 2.56E+06 | 2.56E+06 | NULL | AS | P16144-3 | ITGB4     |
| 275.1  | Regulator of microtubule dynar    | 0.00E+00 | 2.59E+06 | 2.59E+06 | 2.59E+06 | NULL | AS | Q96DB5   | RMDN1     |
| 2613.1 | Cubilin                           | 0.00E+00 | 2.68E+06 | 2.68E+06 | 2.68E+06 | NULL | AS | O60494   | CUBN      |
| 377.1  | Ras GTPase-activating protein-b   | 0.00E+00 | 2.79E+06 | 2.79E+06 | 2.79E+06 | NULL | AS | Q9UN86   | G3BP2     |
| 837.1  | Isoform SM-B1 of Small nuclear    | 0.00E+00 | 2.79E+06 | 2.79E+06 | 2.79E+06 | NULL | AS | P14678-3 | SNRNP     |
| 358.1  | 60S ribosomal protein L11         | 0.00E+00 | 2.85E+06 | 2.85E+06 | 2.85E+06 | NULL | AS | P62913   | RPL11     |
| 405.1  | Interleukin enhancer binding fac  | 0.00E+00 | 2.90E+06 | 2.90E+06 | 2.90E+06 | NULL | AS | Q12906   | ILF3      |
| 472.1  | Thioredoxin                       | 0.00E+00 | 3.03E+06 | 3.03E+06 | 3.03E+06 | NULL | AS | P10599   | TXN       |
| 412.1  | Isoform 2 of Succinyl-CoA ligase  | 0.00E+00 | 3.04E+06 | 3.04E+06 | 3.04E+06 | NULL | AS | Q96I99-2 | SUCLG2    |

|        |                                    |          |          |          |          |      |    |          |          |
|--------|------------------------------------|----------|----------|----------|----------|------|----|----------|----------|
| 385.1  | U1 small nuclear ribonucleoprot    | 0.00E+00 | 3.08E+06 | 3.08E+06 | 3.08E+06 | NULL | AS | P08621   | SNRNP70  |
| 238.1  | SAFB protein                       | 0.00E+00 | 3.13E+06 | 3.13E+06 | 3.13E+06 | NULL | AS | Q15424   | SAFB     |
| 355.1  | Serine/threonine-protein kinase    | 0.00E+00 | 3.33E+06 | 3.33E+06 | 3.33E+06 | NULL | AS | O96013   | PAK4     |
| 1470.1 | Thioredoxin domain-containing      | 0.00E+00 | 3.37E+06 | 3.37E+06 | 3.37E+06 | NULL | AS | Q6PKC3   | TXNDC11  |
| 291.1  | Isoform 3 of Cytoskeleton-assoc    | 0.00E+00 | 3.41E+06 | 3.41E+06 | 3.41E+06 | NULL | AS | Q14008-3 | CKAP5    |
| 259.1  | 60S ribosomal protein L7           | 0.00E+00 | 3.48E+06 | 3.48E+06 | 3.48E+06 | NULL | AS | P18124   | RPL7     |
| 327.1  | Transcription elongation regulat   | 0.00E+00 | 3.53E+06 | 3.53E+06 | 3.53E+06 | NULL | AS | O14776   | TCERG1   |
| 415.1  | Arginine--tRNA ligase, cytoplasn   | 0.00E+00 | 3.56E+06 | 3.56E+06 | 3.56E+06 | NULL | AS | P54136   | RARS     |
| 399.1  | Alpha-L-iduronidase                | 0.00E+00 | 3.68E+06 | 3.68E+06 | 3.68E+06 | NULL | AS | P35475   | IDUA     |
| 292.1  | ATP-binding cassette sub-family    | 0.00E+00 | 3.82E+06 | 3.82E+06 | 3.82E+06 | NULL | AS | Q75MJ1   | ABCF2    |
| 348.1  | Heterogeneous nuclear ribonuc      | 0.00E+00 | 3.82E+06 | 3.82E+06 | 3.82E+06 | NULL | AS | O14979   | HNRPD    |
| 279.1  | Caprin-1                           | 0.00E+00 | 3.92E+06 | 3.92E+06 | 3.92E+06 | NULL | AS | Q14444   | CAPRIN1  |
| 326.1  | 3-hydroxyacyl-CoA dehydrogen       | 0.00E+00 | 4.06E+06 | 4.06E+06 | 4.06E+06 | NULL | AS | Q99714   | HSD17B10 |
| 454.1  | Elongation factor 1-beta           | 0.00E+00 | 4.08E+06 | 4.08E+06 | 4.08E+06 | NULL | AS | P24534   | EEF1B2   |
| 759.1  | 40S ribosomal protein S15          | 0.00E+00 | 4.09E+06 | 4.09E+06 | 4.09E+06 | NULL | AS | K7ELC2   | RPS15    |
| 490.1  | Isoform 2 of Peptidyl-prolyl cis-t | 0.00E+00 | 4.12E+06 | 4.12E+06 | 4.12E+06 | NULL | AS | Q9Y237-2 | PIN4     |
| 357.1  | Septin-9                           | 0.00E+00 | 4.16E+06 | 4.16E+06 | 4.16E+06 | NULL | AS | Q9UHD8   | SEPT9    |
| 404.1  | 40S ribosomal protein S4, X isofi  | 0.00E+00 | 4.18E+06 | 4.18E+06 | 4.18E+06 | NULL | AS | P62701   | RPS4X    |
| 302.1  | Mitochondrial import inner mer     | 0.00E+00 | 4.22E+06 | 4.22E+06 | 4.22E+06 | NULL | AS | G3XAN8   | TIMM8B   |
| 205.1  | Heterogeneous nuclear ribonuc      | 0.00E+00 | 4.32E+06 | 4.32E+06 | 4.32E+06 | NULL | AS | P14866   | HNRNPL   |
| 309.1  | 60S ribosomal protein L7a          | 0.00E+00 | 4.43E+06 | 4.43E+06 | 4.43E+06 | NULL | AS | P62424   | RPL7A    |
| 538.1  | Very long-chain-specific acyl-Co.  | 0.00E+00 | 4.70E+06 | 4.70E+06 | 4.70E+06 | NULL | AS | P49748   | ACADVL   |
| 591.1  | Dihydrolipoyl dehydrogenase, r     | 0.00E+00 | 4.77E+06 | 4.77E+06 | 4.77E+06 | NULL | AS | P09622   | DLD      |
| 281.1  | High mobility group protein B1     | 0.00E+00 | 4.95E+06 | 4.95E+06 | 4.95E+06 | NULL | AS | P09429   | HMGB1    |
| 76.1   | Heterogeneous nuclear ribonuc      | 0.00E+00 | 5.00E+06 | 5.00E+06 | 5.00E+06 | NULL | AS | G8JLB6   | HNRNPH1  |
| 406.1  | Small nuclear ribonucleoprotein    | 0.00E+00 | 5.07E+06 | 5.07E+06 | 5.07E+06 | NULL | AS | P62306   | SNRPF    |
| 408.1  | Small nuclear ribonucleoprotein    | 0.00E+00 | 5.11E+06 | 5.11E+06 | 5.11E+06 | NULL | AS | P62316   | SNRPD2   |
| 134.1  | Poly [ADP-ribose] polymerase 1     | 0.00E+00 | 5.12E+06 | 5.12E+06 | 5.12E+06 | NULL | AS | P09874   | PARP1    |
| 578.1  | Dedicator of cytokinesis protein   | 0.00E+00 | 5.37E+06 | 5.37E+06 | 5.37E+06 | NULL | AS | Q14185   | DOCK1    |
| 122.1  | Serine hydroxymethyltransferas     | 0.00E+00 | 5.38E+06 | 5.38E+06 | 5.38E+06 | NULL | AS | P34897   | SHMT2    |
| 151.1  | Electron transfer flavoprotein su  | 0.00E+00 | 5.45E+06 | 5.45E+06 | 5.45E+06 | NULL | AS | P13804   | ETFA     |
| 316.1  | Protein RCC2                       | 0.00E+00 | 5.46E+06 | 5.46E+06 | 5.46E+06 | NULL | AS | Q9P258   | RCC2     |
| 364.1  | 60S ribosomal protein L13a         | 0.00E+00 | 5.47E+06 | 5.47E+06 | 5.47E+06 | NULL | AS | P40429   | RPL13A   |
| 288.1  | Isoform 4 of Double-stranded RI    | 0.00E+00 | 5.48E+06 | 5.48E+06 | 5.48E+06 | NULL | AS | P55265-4 | ADAR     |
| 154.1  | Phenylalanine--tRNA ligase beta    | 0.00E+00 | 5.53E+06 | 5.53E+06 | 5.53E+06 | NULL | AS | Q9NSD9   | FARSB    |

|       |                                   |          |          |          |          |      |    |          |          |
|-------|-----------------------------------|----------|----------|----------|----------|------|----|----------|----------|
| 249.1 | Coiled-coil domain-containing p   | 0.00E+00 | 5.60E+06 | 5.60E+06 | 5.60E+06 | NULL | AS | Q96CT7   | CCDC124  |
| 226.1 | Isoform 2 of Cleavage and polya   | 0.00E+00 | 5.65E+06 | 5.65E+06 | 5.65E+06 | NULL | AS | Q16630-2 | CPSF6    |
| 588.1 | Isoform 5 of RNA-binding protei   | 0.00E+00 | 5.75E+06 | 5.75E+06 | 5.75E+06 | NULL | AS | Q01844-5 | EWSR1    |
| 162.1 | 60S ribosomal protein L4          | 0.00E+00 | 6.22E+06 | 6.22E+06 | 6.22E+06 | NULL | AS | P36578   | RPL4     |
| 171.1 | Bcl-2-associated transcription fa | 0.00E+00 | 6.38E+06 | 6.38E+06 | 6.38E+06 | NULL | AS | Q9NYF8   | BCLAF1   |
| 159.1 | Protein transport protein Sec24.  | 0.00E+00 | 6.51E+06 | 6.51E+06 | 6.51E+06 | NULL | AS | O95486   | SEC24A   |
| 334.1 | Glutathione reductase, mitoch     | 0.00E+00 | 6.55E+06 | 6.55E+06 | 6.55E+06 | NULL | AS | P00390   | GSR      |
| 320.1 | 40S ribosomal protein S16         | 0.00E+00 | 6.56E+06 | 6.56E+06 | 6.56E+06 | NULL | AS | P62249   | RPS16    |
| 213.1 | Protein RPSAP58                   | 0.00E+00 | 6.66E+06 | 6.66E+06 | 6.66E+06 | NULL | AS | A6NE09   | RPSAP58  |
| 936.1 | Interleukin enhancer-binding fa   | 0.00E+00 | 6.70E+06 | 6.70E+06 | 6.70E+06 | NULL | AS | Q12905   | ILF2     |
| 285.1 | Endothelial differentiation-relat | 0.00E+00 | 7.09E+06 | 7.09E+06 | 7.09E+06 | NULL | AS | O60869   | EDF1     |
| 203.1 | Isoform 7 of Fragile X mental ret | 0.00E+00 | 7.16E+06 | 7.16E+06 | 7.16E+06 | NULL | AS | Q06787-7 | FMR1     |
| 144.1 | 60S ribosomal protein L6          | 0.00E+00 | 7.28E+06 | 7.28E+06 | 7.28E+06 | NULL | AS | Q02878   | RPL6     |
| 282.1 | 40S ribosomal protein S21         | 0.00E+00 | 7.38E+06 | 7.38E+06 | 7.38E+06 | NULL | AS | P63220   | RPS21    |
| 499.1 | Protein NipSnap homolog 1         | 0.00E+00 | 7.39E+06 | 7.39E+06 | 7.39E+06 | NULL | AS | Q9BPW8   | NIPSNAP1 |
| 240.1 | 60S ribosomal protein L27         | 0.00E+00 | 7.95E+06 | 7.95E+06 | 7.95E+06 | NULL | AS | P61353   | RPL27    |
| 86.1  | ATP-dependent RNA helicase DI     | 0.00E+00 | 8.39E+06 | 8.39E+06 | 8.39E+06 | NULL | AS | Q92499   | DDX1     |
| 256.1 | Isoform 5 of Ubiquitin-associate  | 0.00E+00 | 8.67E+06 | 8.67E+06 | 8.67E+06 | NULL | AS | Q14157-5 | UBAP2L   |
| 301.1 | Phenylalanine--tRNA ligase alph   | 0.00E+00 | 8.72E+06 | 8.72E+06 | 8.72E+06 | NULL | AS | K7ER00   | FARSA    |
| 207.1 | 60S ribosomal protein L8          | 0.00E+00 | 9.83E+06 | 9.83E+06 | 9.83E+06 | NULL | AS | P62917   | RPL8     |
| 180.1 | 60S ribosomal protein L24         | 0.00E+00 | 9.89E+06 | 9.89E+06 | 9.89E+06 | NULL | AS | P83731   | RPL24    |
| 156.1 | Cold-inducible RNA-binding prot   | 0.00E+00 | 1.01E+07 | 1.01E+07 | 1.01E+07 | NULL | AS | Q14011   | CIRBP    |
| 387.1 | 60S ribosomal protein L32         | 0.00E+00 | 1.04E+07 | 1.04E+07 | 1.04E+07 | NULL | AS | F8W727   | RPL32    |
| 48.1  | Serine/arginine repetitive matri: | 0.00E+00 | 1.07E+07 | 1.07E+07 | 1.07E+07 | NULL | AS | Q9UQ35   | SRRM2    |
| 619.1 | Isoform 2 of Protein FAM98B       | 0.00E+00 | 1.08E+07 | 1.08E+07 | 1.08E+07 | NULL | AS | Q52LJ0-2 | FAM98B   |
| 165.1 | 60S ribosomal protein L5          | 0.00E+00 | 1.09E+07 | 1.09E+07 | 1.09E+07 | NULL | AS | P46777   | RPL5     |
| 102.1 | Heterogeneous nuclear ribonuc     | 0.00E+00 | 1.10E+07 | 1.10E+07 | 1.10E+07 | NULL | AS | P07910   | HNRNPC   |
| 209.1 | 40S ribosomal protein S5          | 0.00E+00 | 1.15E+07 | 1.15E+07 | 1.15E+07 | NULL | AS | P46782   | RPS5     |
| 575.1 | Protein FAM98A                    | 0.00E+00 | 1.20E+07 | 1.20E+07 | 1.20E+07 | NULL | AS | Q8NCA5   | FAM98A   |
| 150.1 | 40S ribosomal protein S14         | 0.00E+00 | 1.30E+07 | 1.30E+07 | 1.30E+07 | NULL | AS | P62263   | RPS14    |
| 153.1 | Thyroid hormone receptor-asso     | 0.00E+00 | 1.42E+07 | 1.42E+07 | 1.42E+07 | NULL | AS | Q9Y2W1   | THRAP3   |
| 246.1 | Cleavage and polyadenylation sj   | 0.00E+00 | 1.54E+07 | 1.54E+07 | 1.54E+07 | NULL | AS | O43809   | NUDT21   |
| 60.1  | RNA-binding protein 14            | 0.00E+00 | 1.57E+07 | 1.57E+07 | 1.57E+07 | NULL | AS | Q96PK6   | RBM14    |
| 73.1  | Paraspeckle component 1           | 0.00E+00 | 1.72E+07 | 1.72E+07 | 1.72E+07 | NULL | AS | Q8WXF1   | PSPC1    |
| 148.1 | Ras GTPase-activating protein-b   | 0.00E+00 | 1.83E+07 | 1.83E+07 | 1.83E+07 | NULL | AS | Q13283   | G3BP1    |



|        |                                    |          |          |           |           |      |    |          |          |
|--------|------------------------------------|----------|----------|-----------|-----------|------|----|----------|----------|
| 198.1  | Fragile X mental retardation syn   | 0.00E+00 | 2.12E+07 | 2.12E+07  | 2.12E+07  | NULL | AS | P51114   | FXR1     |
| 82.1   | Protein transport protein Sec24    | 0.00E+00 | 2.53E+07 | 2.53E+07  | 2.53E+07  | NULL | AS | B7ZKM8   | SEC24B   |
| 268.1  | KH domain-containing, RNA-bin      | 0.00E+00 | 2.59E+07 | 2.59E+07  | 2.59E+07  | NULL | AS | Q07666   | KHDRBS1  |
| 193.1  | 40S ribosomal protein S25          | 0.00E+00 | 2.70E+07 | 2.70E+07  | 2.70E+07  | NULL | AS | P62851   | RPS25    |
| 139.1  | 60S ribosomal protein L9           | 0.00E+00 | 3.13E+07 | 3.13E+07  | 3.13E+07  | NULL | AS | P32969   | RPL9     |
| 56.1   | Prelamin-A/C                       | 0.00E+00 | 3.28E+07 | 3.28E+07  | 3.28E+07  | NULL | AS | P02545   | LMNA     |
| 45.1   | Isoform 4 of YLP motif-containir   | 0.00E+00 | 4.07E+07 | 4.07E+07  | 4.07E+07  | NULL | AS | P49750-4 | YLPM1    |
| 34.1   | Nuclear receptor coactivator 5     | 0.00E+00 | 4.37E+07 | 4.37E+07  | 4.37E+07  | NULL | AS | Q9HCD5   | NCOA5    |
| 104.1  | 40S ribosomal protein S10          | 0.00E+00 | 6.52E+07 | 6.52E+07  | 6.52E+07  | NULL | AS | P46783   | RPS10    |
| 189.1  | Isoform 2 of 40S ribosomal prot    | 0.00E+00 | 8.27E+07 | 8.27E+07  | 8.27E+07  | NULL | AS | P60866-2 | RPS20    |
| 57.1   | 40S ribosomal protein S19          | 0.00E+00 | 1.27E+08 | 1.27E+08  | 1.27E+08  | NULL | AS | P39019   | RPS19    |
| 66.1   | TATA-binding protein-associate     | 0.00E+00 | 1.64E+08 | 1.64E+08  | 1.64E+08  | NULL | AS | Q92804   | TAF15    |
| 6.1    | Splicing factor, proline- and glut | 0.00E+00 | 2.51E+08 | 2.51E+08  | 2.51E+08  | NULL | AS | P23246   | SFPQ     |
| 2985.1 | WD repeat domain phosphoino:       | 4.27E+02 | 0.00E+00 | -4.27E+02 | -4.27E+02 | NULL | AD | Q5MNZ6   | WDR45B   |
| 1965.1 | NACHT, LRR and PYD domains-c       | 9.93E+02 | 0.00E+00 | -9.93E+02 | -9.93E+02 | NULL | AD | Q9NX02   | NLRP2    |
| 2696.1 | Isoform 2 of Small G protein sigi  | 1.72E+03 | 0.00E+00 | -1.72E+03 | -1.72E+03 | NULL | AD | O43147-2 | SGSM2    |
| 1729.1 | Probable helicase with zinc fing   | 1.74E+03 | 0.00E+00 | -1.74E+03 | -1.74E+03 | NULL | AD | J3QS41   | HELZ     |
| 1849.1 | Methyl-CpG-binding domain prc      | 1.97E+03 | 0.00E+00 | -1.97E+03 | -1.97E+03 | NULL | AD | O95983   | MBD3     |
| 2993.1 | Isoform 2 of Tumor suppressor j    | 2.10E+03 | 0.00E+00 | -2.10E+03 | -2.10E+03 | NULL | AD | Q12888-2 | TP53BP1  |
| 2870.1 | Aurora kinase A                    | 2.14E+03 | 0.00E+00 | -2.14E+03 | -2.14E+03 | NULL | AD | O14965   | AURKA    |
| 2625.1 | Immunoglobulin-like and fibron     | 2.16E+03 | 0.00E+00 | -2.16E+03 | -2.16E+03 | NULL | AD | Q86VF2   | IGFN1    |
| 2243.1 | Protein very KIND                  | 2.54E+03 | 0.00E+00 | -2.54E+03 | -2.54E+03 | NULL | AD | E7ETM1   | KNDC1    |
| 1447.1 | Isoform 2 of Centromere protei     | 2.57E+03 | 0.00E+00 | -2.57E+03 | -2.57E+03 | NULL | AD | Q8N0S6-2 | CENPL    |
| 2467.1 | Isoform 4 of Forkhead box prote    | 2.58E+03 | 0.00E+00 | -2.58E+03 | -2.58E+03 | NULL | AD | Q08050-3 | FOXM1    |
| 2184.1 | X-linked retinitis pigmentosa GT   | 2.60E+03 | 0.00E+00 | -2.60E+03 | -2.60E+03 | NULL | AD | Q96KN7   | RPGRIP1  |
| 2863.1 | Isoform 2A of N-glycosylase/DN     | 2.66E+03 | 0.00E+00 | -2.66E+03 | -2.66E+03 | NULL | AD | O15527-4 | OGG1     |
| 1881.1 | RAP1, GTP-GDP dissociation stin    | 2.70E+03 | 0.00E+00 | -2.70E+03 | -2.70E+03 | NULL | AD | P52306   | RAP1GDS1 |
| 2306.1 | SLIT-ROBO Rho GTPase-activatir     | 3.01E+03 | 0.00E+00 | -3.01E+03 | -3.01E+03 | NULL | AD | O75044   | SRGAP2   |
| 2896.1 | Polymerase I and transcript rele   | 3.30E+03 | 0.00E+00 | -3.30E+03 | -3.30E+03 | NULL | AD | Q6NZI2   | PTRF     |
| 1918.1 | 3-oxo-5-alpha-steroid 4-dehydr     | 3.84E+03 | 0.00E+00 | -3.84E+03 | -3.84E+03 | NULL | AD | F5G XK9  | SRD5A1   |
| 1859.1 | 1-phosphatidylinositol 4,5-bisph   | 4.22E+03 | 0.00E+00 | -4.22E+03 | -4.22E+03 | NULL | AD | Q01970   | PLCB3    |
| 2529.1 | Protein SSUH2 homolog              | 4.73E+03 | 0.00E+00 | -4.73E+03 | -4.73E+03 | NULL | AD | Q9Y2M2   | SSUH2    |
| 959.1  | Small subunit processome comp      | 4.78E+03 | 0.00E+00 | -4.78E+03 | -4.78E+03 | NULL | AD | O75691   | UTP20    |
| 1071.1 | Leucine-rich repeat-containing r   | 4.84E+03 | 0.00E+00 | -4.84E+03 | -4.84E+03 | NULL | AD | Q9Y546   | LRRC42   |
| 1836.1 | Protein-arginine deiminase type    | 5.36E+03 | 0.00E+00 | -5.36E+03 | -5.36E+03 | NULL | AD | Q9UM07   | PADI4    |

|        |                                   |          |          |           |           |      |    |          |         |
|--------|-----------------------------------|----------|----------|-----------|-----------|------|----|----------|---------|
| 2142.1 | Cysteine-rich protein 2-binding   | 5.39E+03 | 0.00E+00 | -5.39E+03 | -5.39E+03 | NULL | AD | Q9H8E8   | CSRP2BP |
| 1403.1 | Leucine-rich repeat neuronal pr   | 5.42E+03 | 0.00E+00 | -5.42E+03 | -5.42E+03 | NULL | AD | Q8WUT4   | LRRN4   |
| 2800.1 | One cut domain family member      | 5.42E+03 | 0.00E+00 | -5.42E+03 | -5.42E+03 | NULL | AD | O60422   | ONECUT3 |
| 1367.1 | Bromodomain-containing prote      | 5.43E+03 | 0.00E+00 | -5.43E+03 | -5.43E+03 | NULL | AD | Q9H0E9   | BRD8    |
| 1636.1 | Unconventional myosin-VIIa        | 5.50E+03 | 0.00E+00 | -5.50E+03 | -5.50E+03 | NULL | AD | Q13402   | MYO7A   |
| 2726.1 | Mitogen-activated protein kinas   | 5.52E+03 | 0.00E+00 | -5.52E+03 | -5.52E+03 | NULL | AD | Q9Y6R4   | MAP3K4  |
| 2428.1 | Replication factor C subunit 1    | 5.54E+03 | 0.00E+00 | -5.54E+03 | -5.54E+03 | NULL | AD | P35251   | RFC1    |
| 2914.1 | Atrial natriuretic peptide recept | 5.54E+03 | 0.00E+00 | -5.54E+03 | -5.54E+03 | NULL | AD | B0ZBF1   | NPR1    |
| 1830.1 | Tenascin-X                        | 5.78E+03 | 0.00E+00 | -5.78E+03 | -5.78E+03 | NULL | AD | P22105   | TNXB    |
| 2612.1 | Death-associated protein kinase   | 5.87E+03 | 0.00E+00 | -5.87E+03 | -5.87E+03 | NULL | AD | O43293   | DAPK3   |
| 3098.1 | Ubiquitin carboxyl-terminal hyd   | 5.89E+03 | 0.00E+00 | -5.89E+03 | -5.89E+03 | NULL | AD | B5MEG5   | USP19   |
| 2112.1 | Coiled-coil domain-containing p   | 5.95E+03 | 0.00E+00 | -5.95E+03 | -5.95E+03 | NULL | AD | Q6ZRK6   | CCDC73  |
| 1825.1 | Extracellular calcium-sensing rei | 5.97E+03 | 0.00E+00 | -5.97E+03 | -5.97E+03 | NULL | AD | E7ENE0   | CASR    |
| 2538.1 | Isoform 2 of Protein FAM35A       | 6.16E+03 | 0.00E+00 | -6.16E+03 | -6.16E+03 | NULL | AD | Q86V20-2 | FAM35A  |
| 3169.1 | Adenylate kinase 8                | 6.21E+03 | 0.00E+00 | -6.21E+03 | -6.21E+03 | NULL | AD | Q96MA6   | AK8     |
| 2573.1 | ATPase family AAA domain-cont     | 6.23E+03 | 0.00E+00 | -6.23E+03 | -6.23E+03 | NULL | AD | Q6PL18   | ATAD2   |
| 1080.1 | Isoform 3 of Zinc-activated ligan | 6.31E+03 | 0.00E+00 | -6.31E+03 | -6.31E+03 | NULL | AD | Q401N2-3 | ZACN    |
| 1412.1 | Isoform 4 of Protein CBFA2T2      | 6.40E+03 | 0.00E+00 | -6.40E+03 | -6.40E+03 | NULL | AD | O43439-4 | CBFA2T2 |
| 2098.1 | Retinoic acid receptor alpha      | 6.40E+03 | 0.00E+00 | -6.40E+03 | -6.40E+03 | NULL | AD | A8MUP8   | RARA    |
| 2267.1 | Nucleoporin GLE1                  | 6.50E+03 | 0.00E+00 | -6.50E+03 | -6.50E+03 | NULL | AD | Q53GS7   | GLE1    |
| 2856.1 | Thioredoxin domain-containing     | 6.58E+03 | 0.00E+00 | -6.58E+03 | -6.58E+03 | NULL | AD | Q86VQ3   | TXNDC2  |
| 1311.1 | Calmodulin-binding transcriptio   | 6.58E+03 | 0.00E+00 | -6.58E+03 | -6.58E+03 | NULL | AD | O94983   | CAMTA2  |
| 2441.1 | Heat shock protein beta-2         | 6.60E+03 | 0.00E+00 | -6.60E+03 | -6.60E+03 | NULL | AD | Q16082   | HSPB2   |
| 1624.1 | Isoform 2 of Semaphorin-4B        | 6.68E+03 | 0.00E+00 | -6.68E+03 | -6.68E+03 | NULL | AD | Q9NPR2-2 | SEMA4B  |
| 2207.1 | Isoamyl acetate-hydrolyzing est   | 6.89E+03 | 0.00E+00 | -6.89E+03 | -6.89E+03 | NULL | AD | Q2TAA2   | IAH1    |
| 1035.1 | Isoform 2 of Dual specificity mit | 6.92E+03 | 0.00E+00 | -6.92E+03 | -6.92E+03 | NULL | AD | P46734-3 | MAP2K3  |
| 1997.1 | Protein TSSC4                     | 6.92E+03 | 0.00E+00 | -6.92E+03 | -6.92E+03 | NULL | AD | Q9Y5U2   | TSSC4   |
| 1063.1 | Solute carrier family 12 membe    | 6.97E+03 | 0.00E+00 | -6.97E+03 | -6.97E+03 | NULL | AD | Q9Y666   | SLC12A7 |
| 1057.1 | Isoform 2 of Gamma-aminobuty      | 6.98E+03 | 0.00E+00 | -6.98E+03 | -6.98E+03 | NULL | AD | P28472-2 | GABRB3  |
| 2402.1 | von Willebrand factor D and EGI   | 7.12E+03 | 0.00E+00 | -7.12E+03 | -7.12E+03 | NULL | AD | Q8N2E2   | VWDE    |
| 2141.1 | RNA polymerase II-associated pi   | 7.35E+03 | 0.00E+00 | -7.35E+03 | -7.35E+03 | NULL | AD | Q9H6T3   | RPAP3   |
| 1271.1 | NDRG family member 3              | 7.42E+03 | 0.00E+00 | -7.42E+03 | -7.42E+03 | NULL | AD | Q5TH30   | NDRG3   |
| 1865.1 | V-set and immunoglobulin domi     | 7.52E+03 | 0.00E+00 | -7.52E+03 | -7.52E+03 | NULL | AD | Q8N0Z9   | VSIG10  |
| 2056.1 | Ribosomal protein S6 kinase del   | 7.65E+03 | 0.00E+00 | -7.65E+03 | -7.65E+03 | NULL | AD | Q96S38   | RPS6KC1 |
| 3128.1 | Isoform 3 of GRAM domain-con      | 7.73E+03 | 0.00E+00 | -7.73E+03 | -7.73E+03 | NULL | AD | Q96HH9-3 | GRAMD3  |

|        |                                   |          |          |           |           |      |    |          |          |
|--------|-----------------------------------|----------|----------|-----------|-----------|------|----|----------|----------|
| 1333.1 | Protein sidekick-1                | 8.15E+03 | 0.00E+00 | -8.15E+03 | -8.15E+03 | NULL | AD | Q7Z5N4   | SDK1     |
| 3246.1 | Receptor-interacting serine/thre  | 8.22E+03 | 0.00E+00 | -8.22E+03 | -8.22E+03 | NULL | AD | Q13546   | RIPK1    |
| 1260.1 | UDP-N-acetylglucosamine trans     | 8.40E+03 | 0.00E+00 | -8.40E+03 | -8.40E+03 | NULL | AD | Q96F25   | ALG14    |
| 2114.1 | ELAV (Embryonic lethal, abnorm    | 8.48E+03 | 0.00E+00 | -8.48E+03 | -8.48E+03 | NULL | AD | B1AM49   | ELAVL2   |
| 1743.1 | Isoform 3 of Trafficking protein  | 8.49E+03 | 0.00E+00 | -8.49E+03 | -8.49E+03 | NULL | AD | P0DI81-3 | TRAPPC2  |
| 2213.1 | DNA-directed RNA polymerase I     | 8.57E+03 | 0.00E+00 | -8.57E+03 | -8.57E+03 | NULL | AD | Q9NW08   | POLR3B   |
| 1727.1 | Brefeldin A-inhibited guanine nu  | 8.65E+03 | 0.00E+00 | -8.65E+03 | -8.65E+03 | NULL | AD | Q5TH69   | ARFGEF3  |
| 2677.1 | Probable ATP-dependent DNA h      | 8.65E+03 | 0.00E+00 | -8.65E+03 | -8.65E+03 | NULL | AD | A2PYH4   | HFM1     |
| 2614.1 | Non-receptor tyrosine-protein k   | 8.83E+03 | 0.00E+00 | -8.83E+03 | -8.83E+03 | NULL | AD | Q13470   | TNK1     |
| 1771.1 | Protein TSSC1                     | 8.89E+03 | 0.00E+00 | -8.89E+03 | -8.89E+03 | NULL | AD | F8WB12   | TSSC1    |
| 3232.1 | DnaI homolog subfamily C mem      | 9.32E+03 | 0.00E+00 | -9.32E+03 | -9.32E+03 | NULL | AD | Q9Y5T4   | DNAJC15  |
| 169.2  | Keratin, type I cytoskeletal 13   | 9.41E+03 | 0.00E+00 | -9.41E+03 | -9.41E+03 | NULL | AD | P13646   | KRT13    |
| 1976.1 | Zinc finger protein 331           | 9.49E+03 | 0.00E+00 | -9.49E+03 | -9.49E+03 | NULL | AD | Q9NQX6   | ZNF331   |
| 2480.1 | Isoform 5 of Golgin subfamily A   | 9.51E+03 | 0.00E+00 | -9.51E+03 | -9.51E+03 | NULL | AD | Q13439-5 | GOLGA4   |
| 3095.1 | Dual specificity protein kinase C | 9.59E+03 | 0.00E+00 | -9.59E+03 | -9.59E+03 | NULL | AD | P49760   | CLK2     |
| 2745.1 | HEAT repeat-containing protein    | 9.69E+03 | 0.00E+00 | -9.69E+03 | -9.69E+03 | NULL | AD | A6NES4   | MROH2A   |
| 2387.1 | WD repeat-containing protein 8    | 9.84E+03 | 0.00E+00 | -9.84E+03 | -9.84E+03 | NULL | AD | Q6ZMY6   | WDR88    |
| 2716.1 | Isoform 3 of Zinc transporter 10  | 1.01E+04 | 0.00E+00 | -1.01E+04 | -1.01E+04 | NULL | AD | Q6XR72-3 | SLC30A10 |
| 2659.1 | Protein PRR5-ARHGAP8              | 1.02E+04 | 0.00E+00 | -1.02E+04 | -1.02E+04 | NULL | AD | B1AHC4   | ARHGAP8  |
| 2487.1 | Group 3 secretory phospholipas    | 1.03E+04 | 0.00E+00 | -1.03E+04 | -1.03E+04 | NULL | AD | Q9NZ20   | PLA2G3   |
| 2507.1 | Pikachurin                        | 1.06E+04 | 0.00E+00 | -1.06E+04 | -1.06E+04 | NULL | AD | Q63HQ2   | EGFLAM   |
| 1423.1 | Liprin alpha4                     | 1.14E+04 | 0.00E+00 | -1.14E+04 | -1.14E+04 | NULL | AD | B1N949   | PPFIA4   |
| 2048.1 | MRG/MORF4L-binding protein        | 1.15E+04 | 0.00E+00 | -1.15E+04 | -1.15E+04 | NULL | AD | Q9NV56   | MRGBP    |
| 1796.1 | Leucine-rich repeat-containing p  | 1.17E+04 | 0.00E+00 | -1.17E+04 | -1.17E+04 | NULL | AD | Q96NW7   | LRRC7    |
| 2016.1 | Isoform 3 of Probable G-protein   | 1.21E+04 | 0.00E+00 | -1.21E+04 | -1.21E+04 | NULL | AD | Q8IZF2-3 | GPR116   |
| 3106.1 | Transcription elongation factor   | 1.26E+04 | 0.00E+00 | -1.26E+04 | -1.26E+04 | NULL | AD | P63272   | SUPT4H1  |
| 943.2  | Isoform 3 of Obscurin             | 1.27E+04 | 0.00E+00 | -1.27E+04 | -1.27E+04 | NULL | AD | Q5VST9-3 | OBSCN    |
| 1984.1 | Zinc finger CCCH domain-containi  | 1.27E+04 | 0.00E+00 | -1.27E+04 | -1.27E+04 | NULL | AD | Q9UPT8   | ZC3H4    |
| 2261.1 | Protein eyes shut homolog         | 1.29E+04 | 0.00E+00 | -1.29E+04 | -1.29E+04 | NULL | AD | Q5T1H1   | EYS      |
| 1794.1 | Nucleosome-remodeling factor      | 1.30E+04 | 0.00E+00 | -1.30E+04 | -1.30E+04 | NULL | AD | Q12830   | BPTF     |
| 1876.1 | E3 ubiquitin-protein ligase Praja | 1.30E+04 | 0.00E+00 | -1.30E+04 | -1.30E+04 | NULL | AD | Q8NG27   | PJA1     |
| 2292.1 | Protein FAM193A                   | 1.30E+04 | 0.00E+00 | -1.30E+04 | -1.30E+04 | NULL | AD | P78312   | FAM193A  |
| 2956.1 | Argininosuccinate synthase        | 1.30E+04 | 0.00E+00 | -1.30E+04 | -1.30E+04 | NULL | AD | P00966   | ASS1     |
| 1121.1 | AH receptor-interacting protein   | 1.31E+04 | 0.00E+00 | -1.31E+04 | -1.31E+04 | NULL | AD | O00170   | AIP      |
| 2535.1 | Neuronal migration protein dou    | 1.31E+04 | 0.00E+00 | -1.31E+04 | -1.31E+04 | NULL | AD | O43602   | DCX      |

|        |                                   |          |          |           |           |      |    |          |            |
|--------|-----------------------------------|----------|----------|-----------|-----------|------|----|----------|------------|
| 1441.1 | Free fatty acid receptor 4        | 1.35E+04 | 0.00E+00 | -1.35E+04 | -1.35E+04 | NULL | AD | Q5NUL3   | FFAR4      |
| 1795.1 | Centrosomal protein C10orf90      | 1.35E+04 | 0.00E+00 | -1.35E+04 | -1.35E+04 | NULL | AD | F5GZL2   | C10orf90   |
| 2474.1 | Zinc finger protein 408           | 1.35E+04 | 0.00E+00 | -1.35E+04 | -1.35E+04 | NULL | AD | Q9H9D4   | ZNF408     |
| 2732.1 | Prokineticin-2                    | 1.36E+04 | 0.00E+00 | -1.36E+04 | -1.36E+04 | NULL | AD | Q9HC23   | PROK2      |
| 1781.1 | Frataxin, mitochondrial           | 1.36E+04 | 0.00E+00 | -1.36E+04 | -1.36E+04 | NULL | AD | Q16595   | FXN        |
| 2379.1 | DNA mismatch repair protein M     | 1.37E+04 | 0.00E+00 | -1.37E+04 | -1.37E+04 | NULL | AD | P52701   | MSH6       |
| 2188.1 | RRP15-like protein                | 1.40E+04 | 0.00E+00 | -1.40E+04 | -1.40E+04 | NULL | AD | Q9Y3B9   | RRP15      |
| 2468.1 | Hypothetical gene supported by    | 1.42E+04 | 0.00E+00 | -1.42E+04 | -1.42E+04 | NULL | AD | Q8N5S0   | LOC389199  |
| 3064.1 | NACHT, LRR and PYD domains-c      | 1.42E+04 | 0.00E+00 | -1.42E+04 | -1.42E+04 | NULL | AD | Q7RTR0   | NLRP9      |
| 3120.1 | Isoform 2 of Single-strand select | 1.44E+04 | 0.00E+00 | -1.44E+04 | -1.44E+04 | NULL | AD | Q53HV7-2 | SMUG1      |
| 1858.1 | Ribosomal protein S6 kinase alp   | 1.46E+04 | 0.00E+00 | -1.46E+04 | -1.46E+04 | NULL | AD | E9PKU3   | RPS6KA4    |
| 1357.1 | Probable tRNA threonylcarbamc     | 1.48E+04 | 0.00E+00 | -1.48E+04 | -1.48E+04 | NULL | AD | Q9H4B0   | OSGEPL1    |
| 1439.1 | Solute carrier organic anion trar | 1.49E+04 | 0.00E+00 | -1.49E+04 | -1.49E+04 | NULL | AD | F8W9W8   | SLCO2A1    |
| 2132.1 | PR domain zinc finger protein 2   | 1.51E+04 | 0.00E+00 | -1.51E+04 | -1.51E+04 | NULL | AD | Q13029   | PRDM2      |
| 2571.1 | FERM and PDZ domain-containii     | 1.51E+04 | 0.00E+00 | -1.51E+04 | -1.51E+04 | NULL | AD | Q5JV73   | FRMPD3     |
| 3100.1 | Serine/threonine-protein kinase   | 1.51E+04 | 0.00E+00 | -1.51E+04 | -1.51E+04 | NULL | AD | F5H2J7   | ULK1       |
| 1694.1 | Isoform 2 of Chondroitin sulfate  | 1.54E+04 | 0.00E+00 | -1.54E+04 | -1.54E+04 | NULL | AD | Q8N6G5-2 | CSGALNACT2 |
| 3179.1 | Diacylglycerol kinase kappa       | 1.54E+04 | 0.00E+00 | -1.54E+04 | -1.54E+04 | NULL | AD | Q5KSL6   | DGKK       |
| 1030.1 | DNA-binding protein RFX7          | 1.57E+04 | 0.00E+00 | -1.57E+04 | -1.57E+04 | NULL | AD | Q2KHR2   | RFX7       |
| 1891.1 | Poly [ADP-ribose] polymerase 2    | 1.58E+04 | 0.00E+00 | -1.58E+04 | -1.58E+04 | NULL | AD | Q9UGN5   | PARP2      |
| 1495.1 | High affinity cAMP-specific and   | 1.60E+04 | 0.00E+00 | -1.60E+04 | -1.60E+04 | NULL | AD | O60658   | PDE8A      |
| 3224.1 | 60S ribosome subunit biogenesi    | 1.65E+04 | 0.00E+00 | -1.65E+04 | -1.65E+04 | NULL | AD | Q9Y221   | NIP7       |
| 1783.1 | Tektin-2                          | 1.66E+04 | 0.00E+00 | -1.66E+04 | -1.66E+04 | NULL | AD | Q9UIF3   | TEKT2      |
| 1438.1 | Plastin-1                         | 1.67E+04 | 0.00E+00 | -1.67E+04 | -1.67E+04 | NULL | AD | Q14651   | PLS1       |
| 2514.1 | CUGBP Elav-like family member     | 1.68E+04 | 0.00E+00 | -1.68E+04 | -1.68E+04 | NULL | AD | Q96J87   | CELF6      |
| 2586.1 | Hypoxia-inducible factor 1-alpha  | 1.68E+04 | 0.00E+00 | -1.68E+04 | -1.68E+04 | NULL | AD | Q9NWT6   | HIF1AN     |
| 1068.1 | Isoform 4 of Piezo-type mechan    | 1.69E+04 | 0.00E+00 | -1.69E+04 | -1.69E+04 | NULL | AD | Q9H5I5-4 | PIEZO2     |
| 2814.1 | Isoform 2 of Adenosine recepto    | 1.70E+04 | 0.00E+00 | -1.70E+04 | -1.70E+04 | NULL | AD | P33765-2 | ADORA3     |
| 13.2   | Pyruvate kinase isozymes R/L      | 1.71E+04 | 0.00E+00 | -1.71E+04 | -1.71E+04 | NULL | AD | P30613   | PKLR       |
| 1792.1 | Putative olfactory receptor 52A   | 1.74E+04 | 0.00E+00 | -1.74E+04 | -1.74E+04 | NULL | AD | A6NMU1   | OR52A4     |
| 2765.1 | Isoform 2 of Tyrosine-protein pf  | 1.74E+04 | 0.00E+00 | -1.74E+04 | -1.74E+04 | NULL | AD | P78324-2 | SIRPA      |
| 3124.1 | Zinc finger protein 560           | 1.74E+04 | 0.00E+00 | -1.74E+04 | -1.74E+04 | NULL | AD | Q96MR9   | ZNF560     |
| 2304.1 | Phosphatase and actin regulator   | 1.77E+04 | 0.00E+00 | -1.77E+04 | -1.77E+04 | NULL | AD | Q96KR7   | PHACTR3    |
| 1543.1 | DDB1- and CUL4-associated fact    | 1.78E+04 | 0.00E+00 | -1.78E+04 | -1.78E+04 | NULL | AD | P61962   | DCAF7      |
| 1982.1 | Receptor-type tyrosine-protein    | 1.79E+04 | 0.00E+00 | -1.79E+04 | -1.79E+04 | NULL | AD | Q16827   | PTPRO      |

|        |                                  |          |          |           |           |      |    |          |          |
|--------|----------------------------------|----------|----------|-----------|-----------|------|----|----------|----------|
| 3130.1 | Coiled-coil domain-containing p  | 1.79E+04 | 0.00E+00 | -1.79E+04 | -1.79E+04 | NULL | AD | C9JV39   | CCDC102B |
| 1547.1 | E3 ubiquitin-protein ligase HACE | 1.82E+04 | 0.00E+00 | -1.82E+04 | -1.82E+04 | NULL | AD | Q8IYU2   | HACE1    |
| 1571.1 | Isoform 7 of LETM1 domain-con    | 1.82E+04 | 0.00E+00 | -1.82E+04 | -1.82E+04 | NULL | AD | Q6P1Q0-7 | LETMD1   |
| 1649.1 | Methylcytosine dioxygenase TE1   | 1.82E+04 | 0.00E+00 | -1.82E+04 | -1.82E+04 | NULL | AD | E7EQS8   | TET2     |
| 2187.1 | Neuropeptide W                   | 1.82E+04 | 0.00E+00 | -1.82E+04 | -1.82E+04 | NULL | AD | Q8N729   | NPW      |
| 1007.1 | Serine/threonine-protein kinase  | 1.83E+04 | 0.00E+00 | -1.83E+04 | -1.83E+04 | NULL | AD | Q8TDX7   | NEK7     |
| 3040.1 | LIM domain-containing protein :  | 1.84E+04 | 0.00E+00 | -1.84E+04 | -1.84E+04 | NULL | AD | Q96IF1   | AJUBA    |
| 2855.1 | Zinc fingers and homeoboxes pr   | 1.85E+04 | 0.00E+00 | -1.85E+04 | -1.85E+04 | NULL | AD | E5RGB8   | ZHX1     |
| 2365.1 | UDP-N-acetylglucosamine--pept    | 1.86E+04 | 0.00E+00 | -1.86E+04 | -1.86E+04 | NULL | AD | O15294   | OGT      |
| 2598.1 | Kinesin-like protein KIF22       | 1.88E+04 | 0.00E+00 | -1.88E+04 | -1.88E+04 | NULL | AD | Q14807   | KIF22    |
| 769.1  | BRO1 domain-containing protei    | 1.90E+04 | 0.00E+00 | -1.90E+04 | -1.90E+04 | NULL | AD | Q5VW32   | BROX     |
| 1390.1 | Serine/threonine-protein kinase  | 1.92E+04 | 0.00E+00 | -1.92E+04 | -1.92E+04 | NULL | AD | Q8TDR2   | STK35    |
| 2014.1 | Mediator of RNA polymerase II    | 1.94E+04 | 0.00E+00 | -1.94E+04 | -1.94E+04 | NULL | AD | Q96HR3   | MED30    |
| 2331.1 | Isoform 2 of Peroxisome biogen   | 2.00E+04 | 0.00E+00 | -2.00E+04 | -2.00E+04 | NULL | AD | O60683-2 | PEX10    |
| 2005.1 | Pumilio homolog 1                | 2.04E+04 | 0.00E+00 | -2.04E+04 | -2.04E+04 | NULL | AD | Q5T1Z8   | PUM1     |
| 1314.1 | 5'-3' exoribonuclease 2          | 2.05E+04 | 0.00E+00 | -2.05E+04 | -2.05E+04 | NULL | AD | Q9H0D6   | XRN2     |
| 2359.1 | MAP3K12-binding inhibitory prc   | 2.06E+04 | 0.00E+00 | -2.06E+04 | -2.06E+04 | NULL | AD | Q9NS73   | MBIP     |
| 1923.1 | Zinc finger protein 174          | 2.08E+04 | 0.00E+00 | -2.08E+04 | -2.08E+04 | NULL | AD | Q15697   | ZNF174   |
| 2045.1 | Myelin-associated glycoprotein   | 2.09E+04 | 0.00E+00 | -2.09E+04 | -2.09E+04 | NULL | AD | P20916   | MAG      |
| 2065.1 | cAMP-dependent protein kinase    | 2.11E+04 | 0.00E+00 | -2.11E+04 | -2.11E+04 | NULL | AD | P17612   | PRKACA   |
| 2463.1 | Protein MMS22-like               | 2.11E+04 | 0.00E+00 | -2.11E+04 | -2.11E+04 | NULL | AD | Q6ZRQ5   | MMS22L   |
| 2249.1 | Protein mago nashi homolog 2     | 2.13E+04 | 0.00E+00 | -2.13E+04 | -2.13E+04 | NULL | AD | Q96A72   | MAGOHB   |
| 1039.1 | Isoform 2 of Transcription elong | 2.18E+04 | 0.00E+00 | -2.18E+04 | -2.18E+04 | NULL | AD | Q96EI5-2 | TCEAL4   |
| 771.1  | Target of rapamycin complex 2 :  | 2.19E+04 | 0.00E+00 | -2.19E+04 | -2.19E+04 | NULL | AD | Q9BPZ7   | MAPKAP1  |
| 1590.1 | Mediator of RNA polymerase II    | 2.19E+04 | 0.00E+00 | -2.19E+04 | -2.19E+04 | NULL | AD | Q15648   | MED1     |
| 1156.1 | Caprin-2                         | 2.20E+04 | 0.00E+00 | -2.20E+04 | -2.20E+04 | NULL | AD | Q6IMN6   | CAPRIN2  |
| 772.1  | 7SK snRNA methylphosphate ca     | 2.21E+04 | 0.00E+00 | -2.21E+04 | -2.21E+04 | NULL | AD | Q7L2J0   | MEPCE    |
| 2404.1 | Nuclear receptor coactivator 2   | 2.24E+04 | 0.00E+00 | -2.24E+04 | -2.24E+04 | NULL | AD | Q15596   | NCOA2    |
| 1523.1 | Isoform 4 of Sperm flagellar pro | 2.27E+04 | 0.00E+00 | -2.27E+04 | -2.27E+04 | NULL | AD | Q9C093-4 | SPEF2    |
| 3117.1 | Partitioning defective 3 homolo  | 2.27E+04 | 0.00E+00 | -2.27E+04 | -2.27E+04 | NULL | AD | Q8TEW8   | PARD3B   |
| 1791.1 | Rho guanine nucleotide exchang   | 2.32E+04 | 0.00E+00 | -2.32E+04 | -2.32E+04 | NULL | AD | A1IGU5   | ARHGEF37 |
| 1625.1 | Spermatogenesis-associated prc   | 2.33E+04 | 0.00E+00 | -2.33E+04 | -2.33E+04 | NULL | AD | Q7Z572   | SPATA21  |
| 1516.1 | Isoform 2 of Nuclear protein loc | 2.34E+04 | 0.00E+00 | -2.34E+04 | -2.34E+04 | NULL | AD | Q8TAT6-2 | NPLOC4   |
| 3152.1 | Probable G-protein coupled rec   | 2.36E+04 | 0.00E+00 | -2.36E+04 | -2.36E+04 | NULL | AD | Q8IZ08   | GPR135   |
| 876.1  | Protein strawberry notch homol   | 2.37E+04 | 0.00E+00 | -2.37E+04 | -2.37E+04 | NULL | AD | A3KN83   | SBNO1    |

|        |                                  |          |          |           |           |      |    |          |         |
|--------|----------------------------------|----------|----------|-----------|-----------|------|----|----------|---------|
| 2025.1 | Interferon regulatory factor 8   | 2.38E+04 | 0.00E+00 | -2.38E+04 | -2.38E+04 | NULL | AD | Q02556   | IRF8    |
| 2886.1 | Isoform 5 of cAMP-specific 3',5' | 2.40E+04 | 0.00E+00 | -2.40E+04 | -2.40E+04 | NULL | AD | Q08499-6 | PDE4D   |
| 1736.1 | N-acyl-phosphatidylethanolami    | 2.41E+04 | 0.00E+00 | -2.41E+04 | -2.41E+04 | NULL | AD | J3KR15   | NAPEPLD |
| 1785.1 | Isoform 3 of Sodium channel pro  | 2.41E+04 | 0.00E+00 | -2.41E+04 | -2.41E+04 | NULL | AD | Q9NY46-3 | SCN3A   |
| 1981.1 | Beta-adducin                     | 2.41E+04 | 0.00E+00 | -2.41E+04 | -2.41E+04 | NULL | AD | P35612   | ADD2    |
| 1742.1 | Beta-1,4-galactosyltransferase 3 | 2.43E+04 | 0.00E+00 | -2.43E+04 | -2.43E+04 | NULL | AD | O60512   | B4GALT3 |
| 168.2  | Isoform 2 of Nucleoside diphosp  | 2.44E+04 | 0.00E+00 | -2.44E+04 | -2.44E+04 | NULL | AD | P15531-2 | NME1    |
| 1550.1 | Paired box protein Pax-1         | 2.44E+04 | 0.00E+00 | -2.44E+04 | -2.44E+04 | NULL | AD | P15863   | PAX1    |
| 2305.1 | Vacuolar protein sorting-associa | 2.47E+04 | 0.00E+00 | -2.47E+04 | -2.47E+04 | NULL | AD | Q96RL7   | VPS13A  |
| 2122.1 | Tubulin polyglutamylase comple   | 2.51E+04 | 0.00E+00 | -2.51E+04 | -2.51E+04 | NULL | AD | Q68CL5   | TPGS2   |
| 1385.1 | Cytoplasmic tRNA 2-thiolation p  | 2.54E+04 | 0.00E+00 | -2.54E+04 | -2.54E+04 | NULL | AD | Q7Z7A3   | CTU1    |
| 2925.1 | Selenide, water dikinase 2       | 2.54E+04 | 0.00E+00 | -2.54E+04 | -2.54E+04 | NULL | AD | J3KR58   | SEPHS2  |
| 2665.1 | Indoleamine 2,3-dioxygenase 1    | 2.57E+04 | 0.00E+00 | -2.57E+04 | -2.57E+04 | NULL | AD | P14902   | IDO1    |
| 1050.1 | Protein unc-45 homolog A         | 2.59E+04 | 0.00E+00 | -2.59E+04 | -2.59E+04 | NULL | AD | Q9H3U1   | UNC45A  |
| 1496.1 | Polymerase delta-interacting pr  | 2.62E+04 | 0.00E+00 | -2.62E+04 | -2.62E+04 | NULL | AD | Q9BY77   | POLDIP3 |
| 1703.1 | Isoform 7 of Calcium/calmodulir  | 2.62E+04 | 0.00E+00 | -2.62E+04 | -2.62E+04 | NULL | AD | Q13554-7 | CAMK2B  |
| 1975.1 | MOSC domain-containing prote     | 2.62E+04 | 0.00E+00 | -2.62E+04 | -2.62E+04 | NULL | AD | Q969Z3   | MARC2   |
| 2148.1 | Glycerol kinase                  | 2.62E+04 | 0.00E+00 | -2.62E+04 | -2.62E+04 | NULL | AD | P32189   | GK      |
| 2358.1 | Neutral cholesterol ester hydrol | 2.62E+04 | 0.00E+00 | -2.62E+04 | -2.62E+04 | NULL | AD | F5H7K4   | NCEH1   |
| 2648.1 | Fukutin                          | 2.62E+04 | 0.00E+00 | -2.62E+04 | -2.62E+04 | NULL | AD | O75072   | FKTN    |
| 2811.1 | Next to BRCA1 gene 1 protein     | 2.62E+04 | 0.00E+00 | -2.62E+04 | -2.62E+04 | NULL | AD | J3KPL5   | NBR1    |
| 2058.1 | EGF-like module-containing muc   | 2.64E+04 | 0.00E+00 | -2.64E+04 | -2.64E+04 | NULL | AD | B4DWB8   | EMR2    |
| 1384.1 | Lysosomal protective protein     | 2.65E+04 | 0.00E+00 | -2.65E+04 | -2.65E+04 | NULL | AD | P10619   | CTSA    |
| 1044.1 | Ras-related protein Rab-34, isof | 2.75E+04 | 0.00E+00 | -2.75E+04 | -2.75E+04 | NULL | AD | P0DI83   | RAB34   |
| 1057.2 | Isoform 3 of Gamma-aminobuty     | 2.77E+04 | 0.00E+00 | -2.77E+04 | -2.77E+04 | NULL | AD | P47870-3 | GABRB2  |
| 2163.1 | TBC1 domain family member 19     | 2.77E+04 | 0.00E+00 | -2.77E+04 | -2.77E+04 | NULL | AD | Q8N5T2   | TBC1D19 |
| 923.1  | Thioredoxin-like protein 1       | 2.82E+04 | 0.00E+00 | -2.82E+04 | -2.82E+04 | NULL | AD | O43396   | TXNL1   |
| 2042.1 | Dynein heavy chain 6, axonemal   | 2.82E+04 | 0.00E+00 | -2.82E+04 | -2.82E+04 | NULL | AD | Q9C0G6   | DNAH6   |
| 1617.1 | Protein arginine N-methyltransf  | 2.85E+04 | 0.00E+00 | -2.85E+04 | -2.85E+04 | NULL | AD | O60678   | PRMT3   |
| 1642.1 | Isoform 4 of Fc receptor-like B  | 2.86E+04 | 0.00E+00 | -2.86E+04 | -2.86E+04 | NULL | AD | Q6BAA4-4 | FCRLB   |
| 1681.1 | Poly(A) polymerase gamma         | 2.88E+04 | 0.00E+00 | -2.88E+04 | -2.88E+04 | NULL | AD | Q9BWT3   | PAPOLG  |
| 3109.1 | Isoform 2 of Zinc finger protein | 2.88E+04 | 0.00E+00 | -2.88E+04 | -2.88E+04 | NULL | AD | Q6ZN55-2 | ZNF574  |
| 2815.1 | Zinc finger protein 821          | 2.95E+04 | 0.00E+00 | -2.95E+04 | -2.95E+04 | NULL | AD | O75541   | ZNF821  |
| 1672.1 | Transmembrane emp24 domain       | 3.00E+04 | 0.00E+00 | -3.00E+04 | -3.00E+04 | NULL | AD | Q13445   | TMED1   |
| 2434.1 | Ras-related protein R-Ras2       | 3.00E+04 | 0.00E+00 | -3.00E+04 | -3.00E+04 | NULL | AD | B7Z5Z2   | RRAS2   |

|        |                                    |          |          |           |           |      |    |          |           |
|--------|------------------------------------|----------|----------|-----------|-----------|------|----|----------|-----------|
| 1128.1 | CTTNBP2 N-terminal-like proteir    | 3.02E+04 | 0.00E+00 | -3.02E+04 | -3.02E+04 | NULL | AD | Q9P2B4   | CTTNBP2NL |
| 2034.1 | Poly [ADP-ribose] polymerase 1     | 3.04E+04 | 0.00E+00 | -3.04E+04 | -3.04E+04 | NULL | AD | Q460N5   | PARP14    |
| 2580.1 | Ataxin-7-like protein 2            | 3.08E+04 | 0.00E+00 | -3.08E+04 | -3.08E+04 | NULL | AD | Q5T6C5   | ATXN7L2   |
| 2831.1 | Isoform 3 of Solute carrier famil  | 3.10E+04 | 0.00E+00 | -3.10E+04 | -3.10E+04 | NULL | AD | O76082-3 | SLC22A5   |
| 2616.1 | Ras-related protein Rab-39B        | 3.25E+04 | 0.00E+00 | -3.25E+04 | -3.25E+04 | NULL | AD | Q96DA2   | RAB39B    |
| 2652.1 | Zinc fingers and homeoboxes pr     | 3.25E+04 | 0.00E+00 | -3.25E+04 | -3.25E+04 | NULL | AD | Q9UKY1   | ZHX1      |
| 2986.1 | Perilipin-1                        | 3.29E+04 | 0.00E+00 | -3.29E+04 | -3.29E+04 | NULL | AD | O60240   | PLIN1     |
| 2417.1 | Isoform 2 of Phosphatidylserine    | 3.31E+04 | 0.00E+00 | -3.31E+04 | -3.31E+04 | NULL | AD | Q9UG56-2 | PISD      |
| 956.1  | Small glutamine-rich tetratricop   | 3.33E+04 | 0.00E+00 | -3.33E+04 | -3.33E+04 | NULL | AD | O43765   | SGTA      |
| 955.1  | Cytoplasmic dynein 1 intermedi     | 3.46E+04 | 0.00E+00 | -3.46E+04 | -3.46E+04 | NULL | AD | Q13409   | DYNC1I2   |
| 1463.1 | Insulin-like growth factor-bindin  | 3.54E+04 | 0.00E+00 | -3.54E+04 | -3.54E+04 | NULL | AD | P18065   | IGFBP2    |
| 2223.1 | Krev interaction trapped proteir   | 3.57E+04 | 0.00E+00 | -3.57E+04 | -3.57E+04 | NULL | AD | O00522   | KRIT1     |
| 2208.1 | Probable ubiquitin carboxyl-terr   | 3.60E+04 | 0.00E+00 | -3.60E+04 | -3.60E+04 | NULL | AD | O00507   | USP9Y     |
| 2684.1 | Isoform BMP1-7 of Bone morph       | 3.63E+04 | 0.00E+00 | -3.63E+04 | -3.63E+04 | NULL | AD | P13497-6 | BMP1      |
| 2237.1 | WD repeat-containing protein 9     | 3.82E+04 | 0.00E+00 | -3.82E+04 | -3.82E+04 | NULL | AD | F8VUX9   | WDR90     |
| 1684.1 | RB1-inducible coiled-coil proteir  | 3.89E+04 | 0.00E+00 | -3.89E+04 | -3.89E+04 | NULL | AD | Q8TDY2   | RB1CC1    |
| 3194.1 | NF-X1-type zinc finger protein N   | 3.96E+04 | 0.00E+00 | -3.96E+04 | -3.96E+04 | NULL | AD | Q6ZNB6   | NFXL1     |
| 3234.1 | Isoform 4 of Transmembrane pr      | 3.96E+04 | 0.00E+00 | -3.96E+04 | -3.96E+04 | NULL | AD | A2VDJ0-5 | KIAA0922  |
| 2697.1 | Steroidogenic factor 1             | 3.98E+04 | 0.00E+00 | -3.98E+04 | -3.98E+04 | NULL | AD | Q13285   | NR5A1     |
| 2895.1 | Myosin light chain kinase, smoo    | 3.99E+04 | 0.00E+00 | -3.99E+04 | -3.99E+04 | NULL | AD | Q15746   | MYLK      |
| 3112.1 | F-box only protein 40              | 3.99E+04 | 0.00E+00 | -3.99E+04 | -3.99E+04 | NULL | AD | Q9UH90   | FBXO40    |
| 2635.1 | Vasoactive intestinal polypeptid   | 4.02E+04 | 0.00E+00 | -4.02E+04 | -4.02E+04 | NULL | AD | P32241   | VIPR1     |
| 2118.1 | Isoform A of Pituitary-specific pr | 4.04E+04 | 0.00E+00 | -4.04E+04 | -4.04E+04 | NULL | AD | P28069-2 | POU1F1    |
| 2121.1 | DnaJ homolog subfamily C mem       | 4.05E+04 | 0.00E+00 | -4.05E+04 | -4.05E+04 | NULL | AD | Q99543   | DNAJC2    |
| 1964.1 | SLC5A2 protein                     | 4.06E+04 | 0.00E+00 | -4.06E+04 | -4.06E+04 | NULL | AD | A2RRD2   | SLC5A2    |
| 2062.1 | Spectrin alpha chain, erythrocyt   | 4.13E+04 | 0.00E+00 | -4.13E+04 | -4.13E+04 | NULL | AD | P02549   | SPTA1     |
| 2012.1 | Complement C1r subcomponen         | 4.16E+04 | 0.00E+00 | -4.16E+04 | -4.16E+04 | NULL | AD | F5H2Z5   | C1RL      |
| 2050.1 | Zinc finger protein 638            | 4.19E+04 | 0.00E+00 | -4.19E+04 | -4.19E+04 | NULL | AD | Q14966   | ZNF638    |
| 2227.1 | Interferon alpha/beta receptor :   | 4.23E+04 | 0.00E+00 | -4.23E+04 | -4.23E+04 | NULL | AD | P17181   | IFNAR1    |
| 2407.1 | Synaptonemal complex protein       | 4.24E+04 | 0.00E+00 | -4.24E+04 | -4.24E+04 | NULL | AD | Q9BX26   | SYCP2     |
| 2527.1 | Nitrogen permease regulator 2-     | 4.25E+04 | 0.00E+00 | -4.25E+04 | -4.25E+04 | NULL | AD | Q8WTW4   | NPRL2     |
| 2421.1 | UV-stimulated scaffold protein /   | 4.28E+04 | 0.00E+00 | -4.28E+04 | -4.28E+04 | NULL | AD | Q2YD98   | UVSSA     |
| 529.2  | Chromodomain-helicase-DNA-b        | 4.34E+04 | 0.00E+00 | -4.34E+04 | -4.34E+04 | NULL | AD | Q8TDIO   | CHD5      |
| 2989.1 | Ras-related protein Rab-3C         | 4.34E+04 | 0.00E+00 | -4.34E+04 | -4.34E+04 | NULL | AD | Q96E17   | RAB3C     |
| 2522.1 | Isoform 2 of Scavenger receptor    | 4.39E+04 | 0.00E+00 | -4.39E+04 | -4.39E+04 | NULL | AD | Q86VB7-2 | CD163     |

|        |                                   |          |          |           |           |      |    |          |          |
|--------|-----------------------------------|----------|----------|-----------|-----------|------|----|----------|----------|
| 1108.1 | Pyridoxal kinase                  | 4.45E+04 | 0.00E+00 | -4.45E+04 | -4.45E+04 | NULL | AD | O00764   | PDXK     |
| 1722.1 | Dual oxidase maturation factor    | 4.45E+04 | 0.00E+00 | -4.45E+04 | -4.45E+04 | NULL | AD | Q1HG44   | DUOXA2   |
| 3185.1 | EPS8L2 protein                    | 4.45E+04 | 0.00E+00 | -4.45E+04 | -4.45E+04 | NULL | AD | B7ZKL3   | EPS8L2   |
| 2606.1 | Nucleolar protein 8               | 4.46E+04 | 0.00E+00 | -4.46E+04 | -4.46E+04 | NULL | AD | Q76FK4   | NOL8     |
| 1733.1 | Thioredoxin domain-containing     | 4.47E+04 | 0.00E+00 | -4.47E+04 | -4.47E+04 | NULL | AD | O95881   | TXNDC12  |
| 2789.1 | Transient receptor potential cat  | 4.49E+04 | 0.00E+00 | -4.49E+04 | -4.49E+04 | NULL | AD | Q9H1D0   | TRPV6    |
| 1133.1 | Nuclear factor of-activated T-ce  | 4.49E+04 | 0.00E+00 | -4.49E+04 | -4.49E+04 | NULL | AD | O94916   | NFAT5    |
| 2687.1 | Isoform 3 of Solute carrier famil | 4.50E+04 | 0.00E+00 | -4.50E+04 | -4.50E+04 | NULL | AD | Q5BKX6-3 | SLC45A4  |
| 3089.1 | Isoform 2 of Protein FAM198B      | 4.52E+04 | 0.00E+00 | -4.52E+04 | -4.52E+04 | NULL | AD | Q6UWH4-  | FAM198B  |
| 2562.1 | Isoform 2 of Zinc transporter ZIF | 4.53E+04 | 0.00E+00 | -4.53E+04 | -4.53E+04 | NULL | AD | Q9BRY0-2 | SLC39A3  |
| 1353.1 | 26S proteasome non-ATPase re      | 4.58E+04 | 0.00E+00 | -4.58E+04 | -4.58E+04 | NULL | AD | P48556   | PSMD8    |
| 2911.1 | Conserved oligomeric Golgi com    | 4.64E+04 | 0.00E+00 | -4.64E+04 | -4.64E+04 | NULL | AD | P83436   | COG7     |
| 2397.1 | Putative upstream-binding factc   | 4.73E+04 | 0.00E+00 | -4.73E+04 | -4.73E+04 | NULL | AD | P0CB48   | UBTFL6   |
| 2517.1 | Leucine-rich repeat serine/threc  | 4.90E+04 | 0.00E+00 | -4.90E+04 | -4.90E+04 | NULL | AD | Q38SD2   | LRRK1    |
| 2788.1 | Isoform 3 of Centrosomal protei   | 4.97E+04 | 0.00E+00 | -4.97E+04 | -4.97E+04 | NULL | AD | Q9C0D2-3 | KIAA1731 |
| 1152.1 | Isoleucine--tRNA ligase, mitochc  | 4.99E+04 | 0.00E+00 | -4.99E+04 | -4.99E+04 | NULL | AD | Q9NSE4   | IARS2    |
| 2597.1 | Oxysterol-binding protein-relate  | 5.00E+04 | 0.00E+00 | -5.00E+04 | -5.00E+04 | NULL | AD | Q9H0X9   | OSBPL5   |
| 2670.1 | Zinc finger protein 385D          | 5.07E+04 | 0.00E+00 | -5.07E+04 | -5.07E+04 | NULL | AD | Q9H6B1   | ZNF385D  |
| 3176.1 | Origin recognition complex subu   | 5.16E+04 | 0.00E+00 | -5.16E+04 | -5.16E+04 | NULL | AD | Q9Y5N6   | ORC6     |
| 870.1  | BAG family molecular chaperon     | 5.17E+04 | 0.00E+00 | -5.17E+04 | -5.17E+04 | NULL | AD | O95817   | BAG3     |
| 1778.1 | Coiled-coil domain-containing p   | 5.18E+04 | 0.00E+00 | -5.18E+04 | -5.18E+04 | NULL | AD | Q9H6F5   | CCDC86   |
| 2192.1 | E3 ubiquitin-protein ligase HECT  | 5.20E+04 | 0.00E+00 | -5.20E+04 | -5.20E+04 | NULL | AD | Q9ULT8   | HECTD1   |
| 2739.1 | Ectonucleoside triphosphate dij   | 5.20E+04 | 0.00E+00 | -5.20E+04 | -5.20E+04 | NULL | AD | O75356   | ENTPD5   |
| 2771.1 | E3 ubiquitin-protein ligase TRIM  | 5.21E+04 | 0.00E+00 | -5.21E+04 | -5.21E+04 | NULL | AD | Q9BRZ2   | TRIM56   |
| 2676.1 | Sodium-dependent multivitamin     | 5.31E+04 | 0.00E+00 | -5.31E+04 | -5.31E+04 | NULL | AD | Q9Y289   | SLC5A6   |
| 1893.1 | Isoform 2 of SKI family transcrip | 5.37E+04 | 0.00E+00 | -5.37E+04 | -5.37E+04 | NULL | AD | P84550-2 | SKOR1    |
| 1962.1 | Zinc finger protein ZFPM1         | 5.37E+04 | 0.00E+00 | -5.37E+04 | -5.37E+04 | NULL | AD | Q8IX07   | ZFPM1    |
| 1268.1 | Armadillo repeat-containing pro   | 5.45E+04 | 0.00E+00 | -5.45E+04 | -5.45E+04 | NULL | AD | Q6NXE6   | ARMC6    |
| 3021.1 | Bestrophin-1                      | 5.47E+04 | 0.00E+00 | -5.47E+04 | -5.47E+04 | NULL | AD | B7Z1N8   | BEST1    |
| 3159.1 | NACHT, LRR and PYD domains-c      | 5.48E+04 | 0.00E+00 | -5.48E+04 | -5.48E+04 | NULL | AD | Q9C000   | NLRP1    |
| 755.1  | DCC-interacting protein 13-alph   | 5.50E+04 | 0.00E+00 | -5.50E+04 | -5.50E+04 | NULL | AD | Q9UKG1   | APPL1    |
| 3216.1 | POM121-like protein 2             | 5.55E+04 | 0.00E+00 | -5.55E+04 | -5.55E+04 | NULL | AD | C9J1I7   | POM121L2 |
| 2946.1 | Isoform 2 of Dolichol-phosphate   | 5.56E+04 | 0.00E+00 | -5.56E+04 | -5.56E+04 | NULL | AD | Q9P2X0-2 | DPM3     |
| 782.1  | Interferon regulatory factor 6    | 5.60E+04 | 0.00E+00 | -5.60E+04 | -5.60E+04 | NULL | AD | O14896   | IRF6     |
| 1654.1 | Vesicle-trafficking protein SEC2  | 5.61E+04 | 0.00E+00 | -5.61E+04 | -5.61E+04 | NULL | AD | Q96IW7   | SEC22A   |



|        |                                     |          |          |           |           |      |    |          |          |
|--------|-------------------------------------|----------|----------|-----------|-----------|------|----|----------|----------|
| 1023.1 | Isoform 7 of T-cell surface glyco   | 5.62E+04 | 0.00E+00 | -5.62E+04 | -5.62E+04 | NULL | AD | P10966-8 | CD8B     |
| 1643.1 | Ras-related protein Rab-6B          | 5.68E+04 | 0.00E+00 | -5.68E+04 | -5.68E+04 | NULL | AD | Q9NRW1   | RAB6B    |
| 3164.1 | Mitogen-activated protein kinas     | 5.68E+04 | 0.00E+00 | -5.68E+04 | -5.68E+04 | NULL | AD | Q5TCX8   | MLK4     |
| 1521.1 | Serine--tRNA ligase, cytoplasmic    | 5.75E+04 | 0.00E+00 | -5.75E+04 | -5.75E+04 | NULL | AD | Q5T5C7   | SARS     |
| 1158.1 | WD repeat-containing protein n      | 5.77E+04 | 0.00E+00 | -5.77E+04 | -5.77E+04 | NULL | AD | Q9NXC5   | MIOS     |
| 2451.1 | Bicaudal D-related protein 1        | 5.77E+04 | 0.00E+00 | -5.77E+04 | -5.77E+04 | NULL | AD | Q6ZP65   | CCDC64   |
| 2532.1 | Isoform 4 of Phosphatidylinositc    | 5.77E+04 | 0.00E+00 | -5.77E+04 | -5.77E+04 | NULL | AD | P27986-4 | PIK3R1   |
| 2436.1 | CUGBP Elav-like family member       | 5.81E+04 | 0.00E+00 | -5.81E+04 | -5.81E+04 | NULL | AD | E9PC62   | CELF2    |
| 1397.1 | Neurofilament heavy polypeptic      | 5.85E+04 | 0.00E+00 | -5.85E+04 | -5.85E+04 | NULL | AD | P12036   | NEFH     |
| 1202.1 | Ubiquitin-1                         | 5.86E+04 | 0.00E+00 | -5.86E+04 | -5.86E+04 | NULL | AD | Q9NPG3   | UBN1     |
| 2502.1 | Interstitial collagenase            | 5.88E+04 | 0.00E+00 | -5.88E+04 | -5.88E+04 | NULL | AD | P03956   | MMP1     |
| 2475.1 | TRAF3-interacting protein 1         | 5.90E+04 | 0.00E+00 | -5.90E+04 | -5.90E+04 | NULL | AD | A8MTK4   | TRAF3IP1 |
| 3180.1 | Isoform 2 of Telomerase-binding     | 5.94E+04 | 0.00E+00 | -5.94E+04 | -5.94E+04 | NULL | AD | Q86US8-2 | SMG6     |
| 1817.1 | Protein FAM53C                      | 6.01E+04 | 0.00E+00 | -6.01E+04 | -6.01E+04 | NULL | AD | D6RE00   | FAM53C   |
| 3119.1 | Nuclear pore complex protein N      | 6.02E+04 | 0.00E+00 | -6.02E+04 | -6.02E+04 | NULL | AD | F5H5C2   | NUP133   |
| 3239.1 | Hexokinase-2                        | 6.03E+04 | 0.00E+00 | -6.03E+04 | -6.03E+04 | NULL | AD | P52789   | HK2      |
| 1969.1 | Unconventional myosin-Ig            | 6.04E+04 | 0.00E+00 | -6.04E+04 | -6.04E+04 | NULL | AD | B0I1T2   | MYO1G    |
| 1900.1 | Isoform 2 of Choriogonadotropi      | 6.06E+04 | 0.00E+00 | -6.06E+04 | -6.06E+04 | NULL | AD | Q6NT52-2 | CGB2     |
| 2460.1 | Isoform 6 of DENN domain-cont       | 6.14E+04 | 0.00E+00 | -6.14E+04 | -6.14E+04 | NULL | AD | Q8TEH3-6 | DENND1A  |
| 1839.1 | Fer-1-like protein 5                | 6.17E+04 | 0.00E+00 | -6.17E+04 | -6.17E+04 | NULL | AD | A0AVI2   | FER1L5   |
| 1090.1 | Actin-binding protein anillin       | 6.21E+04 | 0.00E+00 | -6.21E+04 | -6.21E+04 | NULL | AD | Q9NQW6   | ANLN     |
| 1661.1 | Leucine-rich repeat-containing p    | 6.21E+04 | 0.00E+00 | -6.21E+04 | -6.21E+04 | NULL | AD | Q6F5E8   | RLTPR    |
| 2234.1 | Prolyl 4-hydroxylase subunit alp    | 6.24E+04 | 0.00E+00 | -6.24E+04 | -6.24E+04 | NULL | AD | O15460   | P4HA2    |
| 1752.1 | Cytochrome P450 4F11                | 6.25E+04 | 0.00E+00 | -6.25E+04 | -6.25E+04 | NULL | AD | Q9HBI6   | CYP4F11  |
| 2229.1 | Tyrosine-protein phosphatase n      | 6.25E+04 | 0.00E+00 | -6.25E+04 | -6.25E+04 | NULL | AD | Q06124   | PTPN11   |
| 3182.1 | Tubulin polyglutamylase TTLL13      | 6.29E+04 | 0.00E+00 | -6.29E+04 | -6.29E+04 | NULL | AD | A6NNM8   | TTLL13   |
| 1833.1 | Macoilin                            | 6.32E+04 | 0.00E+00 | -6.32E+04 | -6.32E+04 | NULL | AD | Q8N5G2   | TMEM57   |
| 1531.1 | Prefoldin subunit 2                 | 6.39E+04 | 0.00E+00 | -6.39E+04 | -6.39E+04 | NULL | AD | Q9UHV9   | PFDN2    |
| 1931.1 | Isoform 2 of Synaptotagmin-like     | 6.43E+04 | 0.00E+00 | -6.43E+04 | -6.43E+04 | NULL | AD | Q8TDW5-2 | SYTL5    |
| 3195.1 | Isoform 4 of Inter-alpha-trypsin    | 6.47E+04 | 0.00E+00 | -6.47E+04 | -6.47E+04 | NULL | AD | Q86UX2-4 | ITIH5    |
| 1741.1 | 5-hydroxytryptamine (Serotonin      | 6.50E+04 | 0.00E+00 | -6.50E+04 | -6.50E+04 | NULL | AD | Q5VX04   | HTR7     |
| 1567.1 | von Willebrand factor A domain      | 6.55E+04 | 0.00E+00 | -6.55E+04 | -6.55E+04 | NULL | AD | O00534   | VWA5A    |
| 1691.1 | Nuclear receptor subfamily 4 gr     | 6.67E+04 | 0.00E+00 | -6.67E+04 | -6.67E+04 | NULL | AD | F5GXF0   | NR4A1    |
| 2991.1 | Translation initiation factor IF-3, | 6.71E+04 | 0.00E+00 | -6.71E+04 | -6.71E+04 | NULL | AD | Q9H2K0   | MTIF3    |
| 774.1  | B-cell CLL/lymphoma 9-like prot     | 6.75E+04 | 0.00E+00 | -6.75E+04 | -6.75E+04 | NULL | AD | Q86UU0   | BCL9L    |

|        |                                                          |          |          |           |           |      |    |           |         |
|--------|----------------------------------------------------------|----------|----------|-----------|-----------|------|----|-----------|---------|
| 1993.1 | Potassium voltage-gated channel                          | 6.78E+04 | 0.00E+00 | -6.78E+04 | -6.78E+04 | NULL | AD | Q96PR1    | KCNC2   |
| 2435.1 | Hexokinase-1                                             | 6.78E+04 | 0.00E+00 | -6.78E+04 | -6.78E+04 | NULL | AD | E7ENR4    | HK1     |
| 2929.1 | Putative homeodomain transcription factor                | 6.79E+04 | 0.00E+00 | -6.79E+04 | -6.79E+04 | NULL | AD | Q9UMS5    | PHTF1   |
| 2119.1 | Phosphatidylinositol 3,4,5-trisphosphate 3-kinase        | 6.80E+04 | 0.00E+00 | -6.80E+04 | -6.80E+04 | NULL | AD | P60484    | PTEN    |
| 2620.1 | G-protein-coupled receptor family C class 1 member 1     | 6.81E+04 | 0.00E+00 | -6.81E+04 | -6.81E+04 | NULL | AD | B7Z831    | GPRC5B  |
| 2209.1 | Zinc finger protein 85                                   | 6.83E+04 | 0.00E+00 | -6.83E+04 | -6.83E+04 | NULL | AD | Q03923    | ZNF85   |
| 1480.1 | PiggyBac transposable element                            | 6.94E+04 | 0.00E+00 | -6.94E+04 | -6.94E+04 | NULL | AD | Q96DM1    | PGBD4   |
| 3244.1 | Isoform 2 of Choline transporter                         | 6.94E+04 | 0.00E+00 | -6.94E+04 | -6.94E+04 | NULL | AD | Q8WWI5-2  | SLC44A1 |
| 2260.1 | E3 ubiquitin-protein ligase RNF6                         | 6.96E+04 | 0.00E+00 | -6.96E+04 | -6.96E+04 | NULL | AD | Q9Y252    | RNF6    |
| 1211.1 | RING finger protein 150                                  | 7.02E+04 | 0.00E+00 | -7.02E+04 | -7.02E+04 | NULL | AD | Q9ULK6    | RNF150  |
| 2461.1 | Isoform 2 of Signal transducing molecule 1               | 7.02E+04 | 0.00E+00 | -7.02E+04 | -7.02E+04 | NULL | AD | Q92783-2  | STAM    |
| 2838.1 | Xylosyltransferase 1                                     | 7.04E+04 | 0.00E+00 | -7.04E+04 | -7.04E+04 | NULL | AD | Q86Y38    | XYLT1   |
| 2978.1 | Rab proteins geranylgeranyltransferase 1                 | 7.08E+04 | 0.00E+00 | -7.08E+04 | -7.08E+04 | NULL | AD | P26374    | CHML    |
| 1288.1 | Piwi-like protein 2                                      | 7.10E+04 | 0.00E+00 | -7.10E+04 | -7.10E+04 | NULL | AD | Q8TC59    | PIWIL2  |
| 1366.1 | Zinc finger protein with KRAB domain                     | 7.10E+04 | 0.00E+00 | -7.10E+04 | -7.10E+04 | NULL | AD | P17029    | ZKSCAN1 |
| 2067.1 | Dual oxidase 2                                           | 7.12E+04 | 0.00E+00 | -7.12E+04 | -7.12E+04 | NULL | AD | Q9NRD8    | DUOX2   |
| 1761.1 | Prenylcysteine oxidase-like protein                      | 7.13E+04 | 0.00E+00 | -7.13E+04 | -7.13E+04 | NULL | AD | Q8NBM8    | PCYOX1L |
| 2628.1 | Phosphatidylcholine-sterol acyltransferase 1             | 7.21E+04 | 0.00E+00 | -7.21E+04 | -7.21E+04 | NULL | AD | P04180    | LCAT    |
| 808.1  | Tumor protein D53                                        | 7.22E+04 | 0.00E+00 | -7.22E+04 | -7.22E+04 | NULL | AD | J3KNE7    | TPD52L1 |
| 1968.1 | Putative TBC1 domain family member 1                     | 7.24E+04 | 0.00E+00 | -7.24E+04 | -7.24E+04 | NULL | AD | Q9UFV1    | TBC1D29 |
| 2918.1 | Acyl-coenzyme A synthetase AC                            | 7.24E+04 | 0.00E+00 | -7.24E+04 | -7.24E+04 | NULL | AD | Q53FZ2    | ACSM3   |
| 2176.1 | Isoform 12 of Sorbin and SH3 domain containing protein 1 | 7.26E+04 | 0.00E+00 | -7.26E+04 | -7.26E+04 | NULL | AD | Q9BX66-12 | SORBS1  |
| 2603.1 | Zinc finger protein 189                                  | 7.42E+04 | 0.00E+00 | -7.42E+04 | -7.42E+04 | NULL | AD | O75820    | ZNF189  |
| 2821.1 | UDP-glucuronosyltransferase 2A                           | 7.46E+04 | 0.00E+00 | -7.46E+04 | -7.46E+04 | NULL | AD | Q6UWM9    | UGT2A3  |
| 2017.1 | Synaptobrevin homolog YKT6                               | 7.47E+04 | 0.00E+00 | -7.47E+04 | -7.47E+04 | NULL | AD | O15498    | YKT6    |
| 1599.1 | Syntaxin-11                                              | 7.49E+04 | 0.00E+00 | -7.49E+04 | -7.49E+04 | NULL | AD | O75558    | STX11   |
| 2626.1 | Isoform 2 of Alpha-1,6-mannosyltransferase 1             | 7.51E+04 | 0.00E+00 | -7.51E+04 | -7.51E+04 | NULL | AD | Q3V5L5-2  | MGAT5B  |
| 3209.1 | YrdC domain-containing protein                           | 7.51E+04 | 0.00E+00 | -7.51E+04 | -7.51E+04 | NULL | AD | Q86U90    | YRDC    |
| 2952.1 | NmrA-like family domain-containing protein               | 7.52E+04 | 0.00E+00 | -7.52E+04 | -7.52E+04 | NULL | AD | Q9HBL8    | NMRAL1  |
| 1186.1 | von Willebrand factor A domain                           | 7.66E+04 | 0.00E+00 | -7.66E+04 | -7.66E+04 | NULL | AD | Q9Y334    | VWA7    |
| 1810.1 | Serine/threonine-protein kinase                          | 7.70E+04 | 0.00E+00 | -7.70E+04 | -7.70E+04 | NULL | AD | Q9Y3S1    | WNK2    |
| 3263.1 | von Willebrand factor A domain                           | 7.71E+04 | 0.00E+00 | -7.71E+04 | -7.71E+04 | NULL | AD | Q6PCB0    | VWA1    |
| 1227.1 | Integrin-linked kinase-associated protein                | 7.78E+04 | 0.00E+00 | -7.78E+04 | -7.78E+04 | NULL | AD | Q9H0C8    | ILKAP   |
| 2865.1 | PDZ domain-containing protein                            | 7.84E+04 | 0.00E+00 | -7.84E+04 | -7.84E+04 | NULL | AD | O15018    | PDZD2   |
| 2760.1 | Methyltransferase-like protein                           | 7.88E+04 | 0.00E+00 | -7.88E+04 | -7.88E+04 | NULL | AD | E7ETE0    | METTL8  |

|        |                                  |          |          |           |           |      |    |          |             |
|--------|----------------------------------|----------|----------|-----------|-----------|------|----|----------|-------------|
| 2449.1 | AP-4 complex subunit epsilon-1   | 7.97E+04 | 0.00E+00 | -7.97E+04 | -7.97E+04 | NULL | AD | Q9UPM8   | AP4E1       |
| 3097.1 | Roundabout homolog 4             | 8.05E+04 | 0.00E+00 | -8.05E+04 | -8.05E+04 | NULL | AD | Q8WZ75   | ROBO4       |
| 2554.1 | Coiled-coil domain-containing p  | 8.11E+04 | 0.00E+00 | -8.11E+04 | -8.11E+04 | NULL | AD | A2RUR9   | CCDC144A    |
| 1417.1 | Isoform 2 of Protein FAM76B      | 8.17E+04 | 0.00E+00 | -8.17E+04 | -8.17E+04 | NULL | AD | Q5HYJ3-2 | FAM76B      |
| 1637.1 | Ran-binding protein 17           | 8.19E+04 | 0.00E+00 | -8.19E+04 | -8.19E+04 | NULL | AD | Q9H2T7   | RANBP17     |
| 2074.1 | GTPase IMAP family member 7      | 8.23E+04 | 0.00E+00 | -8.23E+04 | -8.23E+04 | NULL | AD | Q8NHV1   | GIMAP7      |
| 2575.1 | Cingulin                         | 8.24E+04 | 0.00E+00 | -8.24E+04 | -8.24E+04 | NULL | AD | Q9P2M7   | CGN         |
| 2794.1 | Potassium voltage-gated channe   | 8.24E+04 | 0.00E+00 | -8.24E+04 | -8.24E+04 | NULL | AD | Q12809   | KCNH2       |
| 1699.1 | Phostensin                       | 8.29E+04 | 0.00E+00 | -8.29E+04 | -8.29E+04 | NULL | AD | Q6NYC8   | PPP1R18     |
| 1955.1 | UPF0764 protein C16orf89         | 8.30E+04 | 0.00E+00 | -8.30E+04 | -8.30E+04 | NULL | AD | Q6UX73   | C16orf89    |
| 673.1  | Protein FAM168A                  | 8.32E+04 | 0.00E+00 | -8.32E+04 | -8.32E+04 | NULL | AD | Q92567   | FAM168A     |
| 1300.1 | Interferon-stimulated 20 kDa ex  | 8.36E+04 | 0.00E+00 | -8.36E+04 | -8.36E+04 | NULL | AD | Q9H9L3   | ISG20L2     |
| 2210.1 | Gem-associated protein 7         | 8.40E+04 | 0.00E+00 | -8.40E+04 | -8.40E+04 | NULL | AD | Q9H840   | GEMIN7      |
| 3265.1 | G protein-regulated inducer of r | 8.41E+04 | 0.00E+00 | -8.41E+04 | -8.41E+04 | NULL | AD | Q7Z2K8   | GPRIN1      |
| 1424.1 | Isoform 3 of LIM domain kinase   | 8.42E+04 | 0.00E+00 | -8.42E+04 | -8.42E+04 | NULL | AD | P53671-3 | LIMK2       |
| 2253.1 | Immunoglobulin superfamily me    | 8.48E+04 | 0.00E+00 | -8.48E+04 | -8.48E+04 | NULL | AD | Q6WRI0   | IGSF10      |
| 2284.1 | DNA excision repair protein ERC  | 8.57E+04 | 0.00E+00 | -8.57E+04 | -8.57E+04 | NULL | AD | Q03468   | ERCC6       |
| 3031.1 | YTH domain-containing protein    | 8.62E+04 | 0.00E+00 | -8.62E+04 | -8.62E+04 | NULL | AD | J3QR07   | YTHDC1      |
| 1690.1 | HCG2004619                       | 8.63E+04 | 0.00E+00 | -8.63E+04 | -8.63E+04 | NULL | AD | H0YNJ1   | hCG_2004619 |
| 1766.1 | TCF3 fusion partner              | 8.63E+04 | 0.00E+00 | -8.63E+04 | -8.63E+04 | NULL | AD | A8MTQ3   | TFPT        |
| 3087.1 | Protein FAM219A                  | 8.67E+04 | 0.00E+00 | -8.67E+04 | -8.67E+04 | NULL | AD | Q8IW50   | FAM219A     |
| 1633.1 | Ubiquitin carboxyl-terminal hyd  | 8.68E+04 | 0.00E+00 | -8.68E+04 | -8.68E+04 | NULL | AD | Q9P2H5   | USP35       |
| 2951.1 | HCG1987119, isoform CRA_a        | 8.68E+04 | 0.00E+00 | -8.68E+04 | -8.68E+04 | NULL | AD | I3L077   | MYO15B      |
| 1379.1 | Ran-binding protein 3            | 8.72E+04 | 0.00E+00 | -8.72E+04 | -8.72E+04 | NULL | AD | K7EJ17   | RANBP3      |
| 1939.1 | Heparan-sulfate 6-O-sulfotransf  | 8.79E+04 | 0.00E+00 | -8.79E+04 | -8.79E+04 | NULL | AD | Q8IZP7   | HS6ST3      |
| 2738.1 | Mitochondrial-processing peptic  | 9.00E+04 | 0.00E+00 | -9.00E+04 | -9.00E+04 | NULL | AD | O75439   | PMPCB       |
| 2004.1 | Chromodomain-helicase-DNA-b      | 9.06E+04 | 0.00E+00 | -9.06E+04 | -9.06E+04 | NULL | AD | Q9P2D1   | CHD7        |
| 1036.1 | Nuclear speckle splicing regulat | 9.07E+04 | 0.00E+00 | -9.07E+04 | -9.07E+04 | NULL | AD | Q9H0G5   | NSRP1       |
| 1551.1 | Relaxin-3 receptor 1             | 9.13E+04 | 0.00E+00 | -9.13E+04 | -9.13E+04 | NULL | AD | Q9NSD7   | RXFP3       |
| 1935.1 | Inactive phospholipase C-like pr | 9.16E+04 | 0.00E+00 | -9.16E+04 | -9.16E+04 | NULL | AD | Q15111   | PLCL1       |
| 1476.1 | GMP reductase                    | 9.17E+04 | 0.00E+00 | -9.17E+04 | -9.17E+04 | NULL | AD | H0YNJ6   | GMPR2       |
| 3050.1 | Plasma membrane calcium-tran     | 9.19E+04 | 0.00E+00 | -9.19E+04 | -9.19E+04 | NULL | AD | P20020   | ATP2B1      |
| 1967.1 | RelA-associated inhibitor        | 9.20E+04 | 0.00E+00 | -9.20E+04 | -9.20E+04 | NULL | AD | Q8WUF5   | PPP1R13L    |
| 1275.1 | Isoform 8 of C-type lectin domai | 9.23E+04 | 0.00E+00 | -9.23E+04 | -9.23E+04 | NULL | AD | Q9BXN2-8 | CLEC7A      |
| 2819.1 | Serine/threonine-protein kinase  | 9.24E+04 | 0.00E+00 | -9.24E+04 | -9.24E+04 | NULL | AD | Q13535   | ATR         |

|        |                                   |          |          |           |           |      |    |          |          |
|--------|-----------------------------------|----------|----------|-----------|-----------|------|----|----------|----------|
| 3073.1 | Isoform 3 of Phosphatidylinositic | 9.25E+04 | 0.00E+00 | -9.25E+04 | -9.25E+04 | NULL | AD | O60331-3 | PIP5K1C  |
| 1293.1 | RNA polymerase-associated pro     | 9.27E+04 | 0.00E+00 | -9.27E+04 | -9.27E+04 | NULL | AD | Q92541   | RTF1     |
| 2496.1 | Kinesin-like protein KIFC3        | 9.28E+04 | 0.00E+00 | -9.28E+04 | -9.28E+04 | NULL | AD | B7Z484   | KIFC3    |
| 2645.1 | Isoform 5 of Glutamate recepto    | 9.28E+04 | 0.00E+00 | -9.28E+04 | -9.28E+04 | NULL | AD | Q05586-5 | GRIN1    |
| 2579.1 | Endothelin-2                      | 9.33E+04 | 0.00E+00 | -9.33E+04 | -9.33E+04 | NULL | AD | P20800   | EDN2     |
| 2758.1 | GAS2-like protein 1               | 9.35E+04 | 0.00E+00 | -9.35E+04 | -9.35E+04 | NULL | AD | Q99501   | GAS2L1   |
| 2615.1 | Probable cation-transporting AT   | 9.37E+04 | 0.00E+00 | -9.37E+04 | -9.37E+04 | NULL | AD | Q4VNC0   | ATP13A5  |
| 1692.1 | Isoform 5 of Regulator of G-prot  | 9.39E+04 | 0.00E+00 | -9.39E+04 | -9.39E+04 | NULL | AD | P49802-5 | RGS7     |
| 1164.1 | Trifunctional enzyme subunit alj  | 9.42E+04 | 0.00E+00 | -9.42E+04 | -9.42E+04 | NULL | AD | P40939   | HADHA    |
| 2708.1 | Laminin subunit gamma-3           | 9.42E+04 | 0.00E+00 | -9.42E+04 | -9.42E+04 | NULL | AD | Q5JTC4   | LAMC3    |
| 809.1  | Omega-amidase NIT2                | 9.55E+04 | 0.00E+00 | -9.55E+04 | -9.55E+04 | NULL | AD | Q9NQR4   | NIT2     |
| 1308.1 | Putative GTP-binding protein 6    | 9.60E+04 | 0.00E+00 | -9.60E+04 | -9.60E+04 | NULL | AD | O43824   | GTPBP6   |
| 1046.1 | Interferon-related IFRD2 (PC4-B   | 9.62E+04 | 0.00E+00 | -9.62E+04 | -9.62E+04 | NULL | AD | Q9UJ88   | IFRD2    |
| 1797.1 | Isoform 3 of Forkhead box prote   | 9.76E+04 | 0.00E+00 | -9.76E+04 | -9.76E+04 | NULL | AD | Q9BZS1-3 | FOXP3    |
| 2380.1 | Peroxisomal NADH pyrophosphi      | 9.80E+04 | 0.00E+00 | -9.80E+04 | -9.80E+04 | NULL | AD | Q9BQG2   | NUDT12   |
| 1847.1 | Glutathione S-transferase omeg    | 9.83E+04 | 0.00E+00 | -9.83E+04 | -9.83E+04 | NULL | AD | P78417   | GSTO1    |
| 1892.1 | Mitochondrial uncoupling prote    | 9.87E+04 | 0.00E+00 | -9.87E+04 | -9.87E+04 | NULL | AD | P55851   | UCP2     |
| 2992.1 | Protein dopey-2                   | 9.91E+04 | 0.00E+00 | -9.91E+04 | -9.91E+04 | NULL | AD | Q9Y3R5   | DOPEY2   |
| 2790.1 | Putative Polycomb group protei    | 9.92E+04 | 0.00E+00 | -9.92E+04 | -9.92E+04 | NULL | AD | Q8IXJ9   | ASXL1    |
| 2820.1 | Protein RRP5 homolog              | 9.92E+04 | 0.00E+00 | -9.92E+04 | -9.92E+04 | NULL | AD | Q14690   | PDCD11   |
| 2382.1 | Gamma-butyrobetaine dioxyger      | 9.95E+04 | 0.00E+00 | -9.95E+04 | -9.95E+04 | NULL | AD | O75936   | BBOX1    |
| 2587.1 | Thrombospondin type-1 domain      | 9.96E+04 | 0.00E+00 | -9.96E+04 | -9.96E+04 | NULL | AD | Q9NS62   | THSD1    |
| 1907.1 | Pre-mRNA-splicing factor 38A      | 9.99E+04 | 0.00E+00 | -9.99E+04 | -9.99E+04 | NULL | AD | Q8NAV1   | PRPF38A  |
| 569.1  | Inositol monophosphatase 1        | 9.99E+04 | 0.00E+00 | -9.99E+04 | -9.99E+04 | NULL | AD | P29218   | IMPA1    |
| 2081.1 | HCG2044781                        | 1.01E+05 | 0.00E+00 | -1.01E+05 | -1.01E+05 | NULL | AD | G3V2F7   | TMEM189  |
| 1210.1 | Isoform 1 of Transmembrane pr     | 1.02E+05 | 0.00E+00 | -1.02E+05 | -1.02E+05 | NULL | AD | Q96A57-2 | TMEM230  |
| 1888.1 | Isoform 2 of Endophilin-B2        | 1.02E+05 | 0.00E+00 | -1.02E+05 | -1.02E+05 | NULL | AD | Q9NR46-2 | SH3GLB2  |
| 2770.1 | EF-hand domain-containing fam     | 1.02E+05 | 0.00E+00 | -1.02E+05 | -1.02E+05 | NULL | AD | Q8N7U6   | EFHB     |
| 3254.1 | PHD finger protein 21B            | 1.02E+05 | 0.00E+00 | -1.02E+05 | -1.02E+05 | NULL | AD | B1AHC5   | PHF21B   |
| 1816.1 | Heat shock 27kDa protein famil    | 1.03E+05 | 0.00E+00 | -1.03E+05 | -1.03E+05 | NULL | AD | Q8N241   | HSPB7    |
| 2036.1 | IgGfC-binding protein             | 1.03E+05 | 0.00E+00 | -1.03E+05 | -1.03E+05 | NULL | AD | Q9Y6R7   | FCGBP    |
| 2083.1 | SWI/SNF complex subunit SMAF      | 1.03E+05 | 0.00E+00 | -1.03E+05 | -1.03E+05 | NULL | AD | F8VXC8   | SMARCC2  |
| 2090.1 | Ankyrin repeat domain-containi    | 1.03E+05 | 0.00E+00 | -1.03E+05 | -1.03E+05 | NULL | AD | Q9BXX2   | ANKRD30B |
| 3038.1 | Isoform 7 of Serpin A9            | 1.03E+05 | 0.00E+00 | -1.03E+05 | -1.03E+05 | NULL | AD | Q86WD7-7 | SERPINA9 |
| 1028.1 | Septin 10, isoform CRA_c          | 1.04E+05 | 0.00E+00 | -1.04E+05 | -1.04E+05 | NULL | AD | B5ME97   | SEPT10   |

|        |                                   |          |          |           |           |      |    |          |          |
|--------|-----------------------------------|----------|----------|-----------|-----------|------|----|----------|----------|
| 2639.1 | Ribosome production factor 2 h    | 1.04E+05 | 0.00E+00 | -1.04E+05 | -1.04E+05 | NULL | AD | Q9H7B2   | RPF2     |
| 2947.1 | Isoform 6 of GTPase-activating p  | 1.04E+05 | 0.00E+00 | -1.04E+05 | -1.04E+05 | NULL | AD | Q14C86-6 | GAPVD1   |
| 3033.1 | Ephrin type-A receptor 8          | 1.04E+05 | 0.00E+00 | -1.04E+05 | -1.04E+05 | NULL | AD | P29322   | EPHA8    |
| 1334.1 | CTD small phosphatase-like prot   | 1.05E+05 | 0.00E+00 | -1.05E+05 | -1.05E+05 | NULL | AD | F8WED2   | CTDSPL   |
| 1380.1 | E3 ubiquitin-protein ligase MAR   | 1.06E+05 | 0.00E+00 | -1.06E+05 | -1.06E+05 | NULL | AD | F5H6W4   | MARCH7   |
| 1683.1 | Plasma membrane calcium-tran      | 1.06E+05 | 0.00E+00 | -1.06E+05 | -1.06E+05 | NULL | AD | P23634   | ATP2B4   |
| 3177.1 | Probable G-protein coupled rec    | 1.06E+05 | 0.00E+00 | -1.06E+05 | -1.06E+05 | NULL | AD | Q15760   | GPR19    |
| 1934.1 | Immunoglobulin-like domain-co     | 1.07E+05 | 0.00E+00 | -1.07E+05 | -1.07E+05 | NULL | AD | Q71H61   | ILDR2    |
| 2215.1 | Ig lambda chain V-II region NIG-  | 1.07E+05 | 0.00E+00 | -1.07E+05 | -1.07E+05 | NULL | AD | P04209   | LV211    |
| 2553.1 | Isoform 2 of L-amino-acid oxida:  | 1.07E+05 | 0.00E+00 | -1.07E+05 | -1.07E+05 | NULL | AD | Q96RQ9-2 | IL4I1    |
| 2780.1 | Ubiquitin-conjugating enzyme E    | 1.07E+05 | 0.00E+00 | -1.07E+05 | -1.07E+05 | NULL | AD | F8W8F0   | UBE2E2   |
| 2826.1 | Potassium voltage-gated channe    | 1.07E+05 | 0.00E+00 | -1.07E+05 | -1.07E+05 | NULL | AD | Q9NS40   | KCNH7    |
| 970.1  | Dipeptidyl peptidase 3            | 1.08E+05 | 0.00E+00 | -1.08E+05 | -1.08E+05 | NULL | AD | G3V180   | DPP3     |
| 1472.1 | Supervillin                       | 1.08E+05 | 0.00E+00 | -1.08E+05 | -1.08E+05 | NULL | AD | O95425   | SVIL     |
| 2890.1 | Vitamin K-dependent protein C     | 1.08E+05 | 0.00E+00 | -1.08E+05 | -1.08E+05 | NULL | AD | B4DPQ7   | PROC     |
| 2104.1 | Isoform 2 of Protein SSX2         | 1.10E+05 | 0.00E+00 | -1.10E+05 | -1.10E+05 | NULL | AD | Q16385-2 | SSX2     |
| 2455.1 | Probable ribonuclease ZC3H12B     | 1.10E+05 | 0.00E+00 | -1.10E+05 | -1.10E+05 | NULL | AD | E9PAJ6   | ZC3H12B  |
| 2921.1 | Isoform 2 of Microspherule prot   | 1.10E+05 | 0.00E+00 | -1.10E+05 | -1.10E+05 | NULL | AD | Q96EZ8-2 | MCRS1    |
| 1269.1 | Interleukin-34                    | 1.11E+05 | 0.00E+00 | -1.11E+05 | -1.11E+05 | NULL | AD | Q6ZMJ4   | IL34     |
| 1820.1 | PAS domain-containing protein     | 1.11E+05 | 0.00E+00 | -1.11E+05 | -1.11E+05 | NULL | AD | Q8IV76   | PASD1    |
| 2250.1 | Target of Nesh-SH3                | 1.11E+05 | 0.00E+00 | -1.11E+05 | -1.11E+05 | NULL | AD | D3YTG3   | ABI3BP   |
| 2537.1 | NGFI-A-binding protein 1          | 1.11E+05 | 0.00E+00 | -1.11E+05 | -1.11E+05 | NULL | AD | F8W8J7   | NAB1     |
| 2933.1 | Kinocilin                         | 1.11E+05 | 0.00E+00 | -1.11E+05 | -1.11E+05 | NULL | AD | A6PVL3   | KNCN     |
| 3006.1 | Solute carrier family 12 member   | 1.11E+05 | 0.00E+00 | -1.11E+05 | -1.11E+05 | NULL | AD | Q9UHW9   | SLC12A6  |
| 3165.1 | Metallo-beta-lactamase domain     | 1.11E+05 | 0.00E+00 | -1.11E+05 | -1.11E+05 | NULL | AD | Q68D91   | MBLAC2   |
| 1054.1 | Protein-L-isoaspartate O-methyl   | 1.12E+05 | 0.00E+00 | -1.12E+05 | -1.12E+05 | NULL | AD | H7BY58   | PCMT1    |
| 1603.1 | Leucine zipper transcription fact | 1.12E+05 | 0.00E+00 | -1.12E+05 | -1.12E+05 | NULL | AD | F2Z2E6   | LZTFL1   |
| 1910.1 | Putative adenosylhomocysteina     | 1.12E+05 | 0.00E+00 | -1.12E+05 | -1.12E+05 | NULL | AD | O43865   | AHCYL1   |
| 864.1  | Zinc finger protein 10            | 1.13E+05 | 0.00E+00 | -1.13E+05 | -1.13E+05 | NULL | AD | P21506   | ZNF10    |
| 1343.1 | SCO-spondin                       | 1.13E+05 | 0.00E+00 | -1.13E+05 | -1.13E+05 | NULL | AD | A2VEC9   | SSPO     |
| 1822.1 | Keratin, type II cuticular Hb2    | 1.13E+05 | 0.00E+00 | -1.13E+05 | -1.13E+05 | NULL | AD | Q9NSB4   | KRT82    |
| 2097.1 | Probable cation-transporting AT   | 1.13E+05 | 0.00E+00 | -1.13E+05 | -1.13E+05 | NULL | AD | Q9HD20   | ATP13A1  |
| 2736.1 | Isoform 3 of Receptor expressio   | 1.13E+05 | 0.00E+00 | -1.13E+05 | -1.13E+05 | NULL | AD | Q9H902-3 | REEP1    |
| 2982.1 | Monocarboxylate transporter 1f    | 1.13E+05 | 0.00E+00 | -1.13E+05 | -1.13E+05 | NULL | AD | Q8TF71   | SLC16A10 |
| 2680.1 | Zinc finger MIZ domain-containi   | 1.14E+05 | 0.00E+00 | -1.14E+05 | -1.14E+05 | NULL | AD | Q9ULJ6   | ZMIZ1    |

|        |                                  |          |          |           |           |      |    |          |          |
|--------|----------------------------------|----------|----------|-----------|-----------|------|----|----------|----------|
| 3188.1 | Tubulin polyglutamylase TTLL7    | 1.14E+05 | 0.00E+00 | -1.14E+05 | -1.14E+05 | NULL | AD | Q6ZT98   | TTLL7    |
| 1700.1 | Tripartite motif-containing prot | 1.15E+05 | 0.00E+00 | -1.15E+05 | -1.15E+05 | NULL | AD | O00635   | TRIM38   |
| 3042.1 | Orexin receptor type 1           | 1.15E+05 | 0.00E+00 | -1.15E+05 | -1.15E+05 | NULL | AD | O43613   | HCRTR1   |
| 1490.1 | Arf-GAP domain and FG repeat-    | 1.15E+05 | 0.00E+00 | -1.15E+05 | -1.15E+05 | NULL | AD | P52594   | AGFG1    |
| 922.1  | Proteasome activator complex s   | 1.16E+05 | 0.00E+00 | -1.16E+05 | -1.16E+05 | NULL | AD | Q9UL46   | PSME2    |
| 2185.1 | Histamine H1 receptor            | 1.16E+05 | 0.00E+00 | -1.16E+05 | -1.16E+05 | NULL | AD | P35367   | HRH1     |
| 1728.1 | Isoform 2 of Zinc finger protein | 1.17E+05 | 0.00E+00 | -1.17E+05 | -1.17E+05 | NULL | AD | Q8N988-2 | ZNF557   |
| 1912.1 | ETS-related transcription factor | 1.17E+05 | 0.00E+00 | -1.17E+05 | -1.17E+05 | NULL | AD | Q99607   | ELF4     |
| 1945.1 | DNA nucleotidylexotransferase    | 1.17E+05 | 0.00E+00 | -1.17E+05 | -1.17E+05 | NULL | AD | P04053   | DNTT     |
| 2254.1 | Protein OSCP1                    | 1.17E+05 | 0.00E+00 | -1.17E+05 | -1.17E+05 | NULL | AD | Q8WVF1   | OSCP1    |
| 1192.1 | Isoform 3 of Rap guanine nuclec  | 1.18E+05 | 0.00E+00 | -1.18E+05 | -1.18E+05 | NULL | AD | Q13905-3 | RAPGEF1  |
| 2961.1 | F-box-like/WD repeat-containin   | 1.18E+05 | 0.00E+00 | -1.18E+05 | -1.18E+05 | NULL | AD | Q9BZK7   | TBL1XR1  |
| 3250.1 | E3 ubiquitin-protein ligase TRIM | 1.18E+05 | 0.00E+00 | -1.18E+05 | -1.18E+05 | NULL | AD | Q86WT6   | TRIM69   |
| 1001.1 | Neurabin-2                       | 1.19E+05 | 0.00E+00 | -1.19E+05 | -1.19E+05 | NULL | AD | Q96SB3   | PPP1R9B  |
| 1632.1 | Isoform 2 of Presequence prote   | 1.19E+05 | 0.00E+00 | -1.19E+05 | -1.19E+05 | NULL | AD | Q5JRX3-2 | PITRM1   |
| 2409.1 | Lysine-specific demethylase 2A   | 1.19E+05 | 0.00E+00 | -1.19E+05 | -1.19E+05 | NULL | AD | Q9Y2K7   | KDM2A    |
| 2776.1 | Receptor-type tyrosine-protein   | 1.20E+05 | 0.00E+00 | -1.20E+05 | -1.20E+05 | NULL | AD | Q9HD43   | PTPRH    |
| 3133.1 | Polyhomeotic-like protein 1      | 1.20E+05 | 0.00E+00 | -1.20E+05 | -1.20E+05 | NULL | AD | P78364   | PHC1     |
| 668.1  | Isoform 2 of S-methyl-5'-thioad  | 1.21E+05 | 0.00E+00 | -1.21E+05 | -1.21E+05 | NULL | AD | Q13126-2 | MTAP     |
| 2617.1 | Band 4.1-like protein 4A         | 1.21E+05 | 0.00E+00 | -1.21E+05 | -1.21E+05 | NULL | AD | Q9HCS5   | EPB41L4A |
| 3055.1 | Dual specificity protein phospho | 1.21E+05 | 0.00E+00 | -1.21E+05 | -1.21E+05 | NULL | AD | Q9H1R2   | DUSP15   |
| 2787.1 | Isoform 2 of F-box/WD repeat-c   | 1.22E+05 | 0.00E+00 | -1.22E+05 | -1.22E+05 | NULL | AD | Q5XX13-2 | FBXW10   |
| 1323.1 | Endophilin-A2                    | 1.23E+05 | 0.00E+00 | -1.23E+05 | -1.23E+05 | NULL | AD | Q99961   | SH3GL1   |
| 1312.1 | PC4 and SFRS1-interacting prote  | 1.24E+05 | 0.00E+00 | -1.24E+05 | -1.24E+05 | NULL | AD | O75475   | PSIP1    |
| 1319.1 | Sulfhydryl oxidase 1             | 1.24E+05 | 0.00E+00 | -1.24E+05 | -1.24E+05 | NULL | AD | O00391   | QSOX1    |
| 2484.1 | Protein-associating with the car | 1.24E+05 | 0.00E+00 | -1.24E+05 | -1.24E+05 | NULL | AD | Q8IZE3   | SCYL3    |
| 1929.1 | Early endosome antigen 1         | 1.25E+05 | 0.00E+00 | -1.25E+05 | -1.25E+05 | NULL | AD | Q15075   | EEA1     |
| 1996.1 | Anthrax toxin receptor 1         | 1.25E+05 | 0.00E+00 | -1.25E+05 | -1.25E+05 | NULL | AD | Q9H6X2   | ANTXR1   |
| 1575.1 | C5a anaphylatoxin chemotactic    | 1.26E+05 | 0.00E+00 | -1.26E+05 | -1.26E+05 | NULL | AD | P21730   | C5AR1    |
| 2883.1 | Homeobox protein Hox-B5          | 1.26E+05 | 0.00E+00 | -1.26E+05 | -1.26E+05 | NULL | AD | P09067   | HOXB5    |
| 3134.1 | AF4/FMR2 family member 2         | 1.26E+05 | 0.00E+00 | -1.26E+05 | -1.26E+05 | NULL | AD | P51816   | AFF2     |
| 3202.1 | Golgin subfamily A member 2      | 1.26E+05 | 0.00E+00 | -1.26E+05 | -1.26E+05 | NULL | AD | Q08379   | GOLGA2   |
| 812.1  | Core histone macro-H2A.1         | 1.27E+05 | 0.00E+00 | -1.27E+05 | -1.27E+05 | NULL | AD | O75367   | H2AFY    |
| 905.1  | Zinc finger protein 607          | 1.27E+05 | 0.00E+00 | -1.27E+05 | -1.27E+05 | NULL | AD | Q96SK3   | ZNF607   |
| 1987.1 | Isoform 3 of Histone acetyltrans | 1.27E+05 | 0.00E+00 | -1.27E+05 | -1.27E+05 | NULL | AD | Q92993-3 | KAT5     |

|        |                                    |          |          |           |           |      |    |          |          |
|--------|------------------------------------|----------|----------|-----------|-----------|------|----|----------|----------|
| 2179.1 | Kallikrein-14                      | 1.27E+05 | 0.00E+00 | -1.27E+05 | -1.27E+05 | NULL | AD | Q9P0G3   | KLK14    |
| 2248.1 | Solute carrier family 25 member    | 1.27E+05 | 0.00E+00 | -1.27E+05 | -1.27E+05 | NULL | AD | Q6PIV7   | SLC25A34 |
| 1501.1 | AP-3 complex subunit beta-1        | 1.29E+05 | 0.00E+00 | -1.29E+05 | -1.29E+05 | NULL | AD | O00203   | AP3B1    |
| 2717.1 | Probable UDP-sugar transporter     | 1.29E+05 | 0.00E+00 | -1.29E+05 | -1.29E+05 | NULL | AD | Q9BS91   | SLC35A5  |
| 2979.1 | Isoform 2 of Bromodomain testi     | 1.29E+05 | 0.00E+00 | -1.29E+05 | -1.29E+05 | NULL | AD | Q58F21-2 | BRDT     |
| 3170.1 | Protocadherin gamma-A11            | 1.29E+05 | 0.00E+00 | -1.29E+05 | -1.29E+05 | NULL | AD | Q9Y5H2   | PCDHGA11 |
| 2348.1 | Cadherin-18                        | 1.30E+05 | 0.00E+00 | -1.30E+05 | -1.30E+05 | NULL | AD | Q13634   | CDH18    |
| 1827.1 | Cyclin-G-associated kinase         | 1.31E+05 | 0.00E+00 | -1.31E+05 | -1.31E+05 | NULL | AD | O14976   | GAK      |
| 872.1  | Serine dehydratase-like            | 1.32E+05 | 0.00E+00 | -1.32E+05 | -1.32E+05 | NULL | AD | Q96GA7   | SDSL     |
| 1285.1 | Isoform LCRMP-1 of Dihydropyr      | 1.32E+05 | 0.00E+00 | -1.32E+05 | -1.32E+05 | NULL | AD | Q14194-2 | CRMP1    |
| 1932.1 | Olfactory receptor 2S2             | 1.32E+05 | 0.00E+00 | -1.32E+05 | -1.32E+05 | NULL | AD | Q9NQN1   | OR2S2    |
| 3155.1 | NRF1 protein                       | 1.32E+05 | 0.00E+00 | -1.32E+05 | -1.32E+05 | NULL | AD | Q96AN2   | NRF1     |
| 2592.1 | Filamin-A-interacting protein 1    | 1.33E+05 | 0.00E+00 | -1.33E+05 | -1.33E+05 | NULL | AD | Q7Z7B0   | FILIP1   |
| 3253.1 | Brain-specific angiogenesis inhib  | 1.33E+05 | 0.00E+00 | -1.33E+05 | -1.33E+05 | NULL | AD | Q9UHR4   | BAIAP2L1 |
| 1281.1 | Isoform 3 of Kinesin light chain 3 | 1.34E+05 | 0.00E+00 | -1.34E+05 | -1.34E+05 | NULL | AD | Q6P597-3 | KLC3     |
| 1990.1 | Nucleus accumbens-associated       | 1.35E+05 | 0.00E+00 | -1.35E+05 | -1.35E+05 | NULL | AD | Q96RE7   | NACC1    |
| 2405.1 | ATP-dependent RNA helicase DDX     | 1.35E+05 | 0.00E+00 | -1.35E+05 | -1.35E+05 | NULL | AD | Q9GZR7   | DDX24    |
| 1602.1 | Isoform 2 of Deleted in azoospe    | 1.36E+05 | 0.00E+00 | -1.36E+05 | -1.36E+05 | NULL | AD | Q92904-2 | DAZL     |
| 2152.1 | Non-specific cytotoxic cell recep  | 1.36E+05 | 0.00E+00 | -1.36E+05 | -1.36E+05 | NULL | AD | Q6ZVX7   | NCCRP1   |
| 2279.1 | Nipped-B-like protein              | 1.36E+05 | 0.00E+00 | -1.36E+05 | -1.36E+05 | NULL | AD | Q6KC79   | NIPBL    |
| 2844.1 | General transcription factor IIH   | 1.36E+05 | 0.00E+00 | -1.36E+05 | -1.36E+05 | NULL | AD | Q6P1K8   | GTF2H2C  |
| 2924.1 | Small membrane A-kinase anch       | 1.37E+05 | 0.00E+00 | -1.37E+05 | -1.37E+05 | NULL | AD | Q9BSF0   | C2orf88  |
| 807.1  | Proteasome subunit beta type-1     | 1.39E+05 | 0.00E+00 | -1.39E+05 | -1.39E+05 | NULL | AD | P20618   | PSMB1    |
| 1200.1 | Ankyrin repeat domain-containi     | 1.39E+05 | 0.00E+00 | -1.39E+05 | -1.39E+05 | NULL | AD | O75179   | ANKRD17  |
| 2341.1 | Isoform 2 of Inversin              | 1.39E+05 | 0.00E+00 | -1.39E+05 | -1.39E+05 | NULL | AD | Q9Y283-2 | INVS     |
| 2729.1 | Serine/threonine-protein kinase    | 1.39E+05 | 0.00E+00 | -1.39E+05 | -1.39E+05 | NULL | AD | O94768   | STK17B   |
| 1787.1 | Isoform D of Nuclear RNA expor     | 1.41E+05 | 0.00E+00 | -1.41E+05 | -1.41E+05 | NULL | AD | Q9H1B4-4 | NXF5     |
| 2309.1 | Contactin-associated protein 1     | 1.42E+05 | 0.00E+00 | -1.42E+05 | -1.42E+05 | NULL | AD | K7EMM9   | CNTNAP1  |
| 2847.1 | Isoform 6 of Myocardial zonula     | 1.42E+05 | 0.00E+00 | -1.42E+05 | -1.42E+05 | NULL | AD | P0CAP1-6 | MYZAP    |
| 3060.1 | Zinc finger protein 143            | 1.43E+05 | 0.00E+00 | -1.43E+05 | -1.43E+05 | NULL | AD | P52747   | ZNF143   |
| 1162.1 | Netrin receptor DCC                | 1.44E+05 | 0.00E+00 | -1.44E+05 | -1.44E+05 | NULL | AD | P43146   | DCC      |
| 1252.1 | Proline and serine-rich protein 2  | 1.44E+05 | 0.00E+00 | -1.44E+05 | -1.44E+05 | NULL | AD | Q86WR7   | PROSER2  |
| 2389.1 | Isoform 3 of Phosphatidylinosit    | 1.44E+05 | 0.00E+00 | -1.44E+05 | -1.44E+05 | NULL | AD | Q8TBX8-3 | PIP4K2C  |
| 764.1  | CD2-associated protein             | 1.45E+05 | 0.00E+00 | -1.45E+05 | -1.45E+05 | NULL | AD | Q9Y5K6   | CD2AP    |
| 1481.1 | Fatty acid desaturase 6            | 1.45E+05 | 0.00E+00 | -1.45E+05 | -1.45E+05 | NULL | AD | Q8N9I5   | FADS6    |

|        |                                    |          |          |           |           |      |    |          |          |
|--------|------------------------------------|----------|----------|-----------|-----------|------|----|----------|----------|
| 1784.1 | Ankyrin repeat domain 30A          | 1.45E+05 | 0.00E+00 | -1.45E+05 | -1.45E+05 | NULL | AD | Q5W026   | ANKRD30A |
| 1867.1 | Occludin/ELL domain-containing     | 1.46E+05 | 0.00E+00 | -1.46E+05 | -1.46E+05 | NULL | AD | Q9H607   | OCEL1    |
| 2308.1 | Isoform 2 of Splicing factor, sup  | 1.46E+05 | 0.00E+00 | -1.46E+05 | -1.46E+05 | NULL | AD | Q12872-2 | SFSWAP   |
| 2351.1 | Gastricsin                         | 1.46E+05 | 0.00E+00 | -1.46E+05 | -1.46E+05 | NULL | AD | P20142   | PGC      |
| 1870.1 | T-box transcription factor TBX3    | 1.47E+05 | 0.00E+00 | -1.47E+05 | -1.47E+05 | NULL | AD | O15119   | TBX3     |
| 2354.1 | Transferrin receptor protein 2     | 1.47E+05 | 0.00E+00 | -1.47E+05 | -1.47E+05 | NULL | AD | Q9UP52   | TFR2     |
| 1232.1 | 5'-3' exoribonuclease 1            | 1.48E+05 | 0.00E+00 | -1.48E+05 | -1.48E+05 | NULL | AD | Q8IZH2   | XRN1     |
| 574.2  | Isoform 2 of Zinc finger CCCH dc   | 1.49E+05 | 0.00E+00 | -1.49E+05 | -1.49E+05 | NULL | AD | Q86VM9-2 | ZC3H18   |
| 1855.1 | Ras-GEF domain-containing fam      | 1.49E+05 | 0.00E+00 | -1.49E+05 | -1.49E+05 | NULL | AD | Q0VAM2   | RASGEF1B |
| 1548.1 | Ankyrin repeat domain-containi     | 1.50E+05 | 0.00E+00 | -1.50E+05 | -1.50E+05 | NULL | AD | A2A2Z9   | ANKRD18B |
| 1572.1 | Cullin-1                           | 1.50E+05 | 0.00E+00 | -1.50E+05 | -1.50E+05 | NULL | AD | Q13616   | CUL1     |
| 2367.1 | Laminin subunit beta-1             | 1.50E+05 | 0.00E+00 | -1.50E+05 | -1.50E+05 | NULL | AD | G3XAI2   | LAMB1    |
| 1327.1 | Ankyrin repeat domain-containi     | 1.51E+05 | 0.00E+00 | -1.51E+05 | -1.51E+05 | NULL | AD | Q9ULJ7   | ANKRD50  |
| 2057.1 | Protein FAM54A                     | 1.51E+05 | 0.00E+00 | -1.51E+05 | -1.51E+05 | NULL | AD | Q6P444   | MTFR2    |
| 2174.1 | Formin-1                           | 1.51E+05 | 0.00E+00 | -1.51E+05 | -1.51E+05 | NULL | AD | Q68DA7   | FMN1     |
| 1607.1 | Serine beta-lactamase-like prote   | 1.52E+05 | 0.00E+00 | -1.52E+05 | -1.52E+05 | NULL | AD | P83111   | LACTB    |
| 1942.1 | SNW domain-containing protein      | 1.52E+05 | 0.00E+00 | -1.52E+05 | -1.52E+05 | NULL | AD | G3V4X8   | SNW1     |
| 2700.1 | ARHGEF1 protein                    | 1.52E+05 | 0.00E+00 | -1.52E+05 | -1.52E+05 | NULL | AD | Q6NX52   | ARHGEF1  |
| 3013.1 | PH domain leucine-rich repeat-c    | 1.52E+05 | 0.00E+00 | -1.52E+05 | -1.52E+05 | NULL | AD | H3BMS5   | PHLPP2   |
| 1355.1 | Tripartite motif-containing 2, isc | 1.52E+05 | 0.00E+00 | -1.52E+05 | -1.52E+05 | NULL | AD | Q9C040   | TRIM2    |
| 1535.1 | SH3 domain-containing kinase-t     | 1.54E+05 | 0.00E+00 | -1.54E+05 | -1.54E+05 | NULL | AD | Q96B97   | SH3KBP1  |
| 2240.1 | 39S ribosomal protein L28, mito    | 1.54E+05 | 0.00E+00 | -1.54E+05 | -1.54E+05 | NULL | AD | Q13084   | MRPL28   |
| 2391.1 | Ras-related protein Rab-5A         | 1.54E+05 | 0.00E+00 | -1.54E+05 | -1.54E+05 | NULL | AD | P20339   | RAB5A    |
| 3143.1 | Probable E3 ubiquitin-protein li   | 1.54E+05 | 0.00E+00 | -1.54E+05 | -1.54E+05 | NULL | AD | Q5TC82   | RC3H1    |
| 1442.1 | Protein S100-A13                   | 1.55E+05 | 0.00E+00 | -1.55E+05 | -1.55E+05 | NULL | AD | Q99584   | S100A13  |
| 2275.1 | Lebercilin-like protein            | 1.56E+05 | 0.00E+00 | -1.56E+05 | -1.56E+05 | NULL | AD | O95447   | LCA5L    |
| 2977.1 | Isoform 2 of Kin of IRRE-like pro  | 1.56E+05 | 0.00E+00 | -1.56E+05 | -1.56E+05 | NULL | AD | Q96J84-2 | KIRREL   |
| 3217.1 | Exophilin-5                        | 1.56E+05 | 0.00E+00 | -1.56E+05 | -1.56E+05 | NULL | AD | Q8NEV8   | EXPH5    |
| 1863.1 | Ras-related protein Rab-44         | 1.57E+05 | 0.00E+00 | -1.57E+05 | -1.57E+05 | NULL | AD | Q7Z6P3   | RAB44    |
| 2384.1 | Phosphatidylinositol 4,5-bispho:   | 1.57E+05 | 0.00E+00 | -1.57E+05 | -1.57E+05 | NULL | AD | P42338   | PIK3CB   |
| 893.1  | Serine/arginine repetitive matri:  | 1.58E+05 | 0.00E+00 | -1.58E+05 | -1.58E+05 | NULL | AD | A7MD48   | SRRM4    |
| 3003.1 | Butyrophilin-like protein 3        | 1.58E+05 | 0.00E+00 | -1.58E+05 | -1.58E+05 | NULL | AD | Q6UXE8   | BTNL3    |
| 2861.1 | Spermatogenesis-associated pro     | 1.60E+05 | 0.00E+00 | -1.60E+05 | -1.60E+05 | NULL | AD | Q9P0W8   | SPATA7   |
| 1620.1 | 5'-AMP-activated protein kinase    | 1.61E+05 | 0.00E+00 | -1.61E+05 | -1.61E+05 | NULL | AD | Q9UGJ0   | PRKAG2   |
| 1634.1 | CMP-sialic acid transporter        | 1.61E+05 | 0.00E+00 | -1.61E+05 | -1.61E+05 | NULL | AD | P78382   | SLC35A1  |



|        |                                       |          |          |           |           |      |    |          |          |
|--------|---------------------------------------|----------|----------|-----------|-----------|------|----|----------|----------|
| 1730.1 | VWFA and cache domain-contai          | 1.61E+05 | 0.00E+00 | -1.61E+05 | -1.61E+05 | NULL | AD | Q5VU97   | CACHD1   |
| 1469.1 | Fanconi anemia group D2 protei        | 1.62E+05 | 0.00E+00 | -1.62E+05 | -1.62E+05 | NULL | AD | Q9BXW9   | FANCD2   |
| 2106.1 | Brefeldin A-inhibited guanine nu      | 1.62E+05 | 0.00E+00 | -1.62E+05 | -1.62E+05 | NULL | AD | Q9Y6D5   | ARFGEF2  |
| 2761.1 | Sushi, nidogen and EGF-like don       | 1.62E+05 | 0.00E+00 | -1.62E+05 | -1.62E+05 | NULL | AD | Q8TER0   | SNED1    |
| 2110.1 | Down syndrome cell adhesion n         | 1.63E+05 | 0.00E+00 | -1.63E+05 | -1.63E+05 | NULL | AD | O60469   | DSCAM    |
| 2457.1 | Syntaxin-binding protein 3            | 1.63E+05 | 0.00E+00 | -1.63E+05 | -1.63E+05 | NULL | AD | O00186   | STXBP3   |
| 3088.1 | tRNA wybutosine-synthesizing p        | 1.63E+05 | 0.00E+00 | -1.63E+05 | -1.63E+05 | NULL | AD | Q6NUM6   | TYW1B    |
| 3220.1 | ER membrane protein complex :         | 1.63E+05 | 0.00E+00 | -1.63E+05 | -1.63E+05 | NULL | AD | Q8N766   | EMC1     |
| 1569.1 | Isoform 4 of Protein SMG7             | 1.64E+05 | 0.00E+00 | -1.64E+05 | -1.64E+05 | NULL | AD | Q92540-4 | SMG7     |
| 2032.1 | Sodium channel protein type 5 s       | 1.64E+05 | 0.00E+00 | -1.64E+05 | -1.64E+05 | NULL | AD | H9KVD2   | SCN5A    |
| 2339.1 | Isoform 3 of MBT domain-conta         | 1.64E+05 | 0.00E+00 | -1.64E+05 | -1.64E+05 | NULL | AD | Q05BQ5-3 | MBTD1    |
| 3074.1 | Isoform 3 of Disks large-associa      | 1.64E+05 | 0.00E+00 | -1.64E+05 | -1.64E+05 | NULL | AD | Q15398-3 | DLGAP5   |
|        | 3.8 Desmin                            | 1.66E+05 | 0.00E+00 | -1.66E+05 | -1.66E+05 | NULL | AD | P17661   | DES      |
| 2830.1 | Ecotropic viral integration site 5    | 1.66E+05 | 0.00E+00 | -1.66E+05 | -1.66E+05 | NULL | AD | F5H4R0   | EVI5     |
| 1644.1 | Phosphatidylinositol 3,4,5-trisph     | 1.67E+05 | 0.00E+00 | -1.67E+05 | -1.67E+05 | NULL | AD | Q92835   | INPP5D   |
| 1494.1 | Charged multivesicular body prc       | 1.68E+05 | 0.00E+00 | -1.68E+05 | -1.68E+05 | NULL | AD | Q14D22   | CHMP4A   |
| 2015.1 | Cyclin-dependent kinase 15            | 1.69E+05 | 0.00E+00 | -1.69E+05 | -1.69E+05 | NULL | AD | Q96Q40   | CDK15    |
| 2809.1 | RCC1 and BTB domain-containin         | 1.69E+05 | 0.00E+00 | -1.69E+05 | -1.69E+05 | NULL | AD | B4DWG0   | RCBTB2   |
| 1723.1 | Isoform 2 of E3 ubiquitin-proteii     | 1.70E+05 | 0.00E+00 | -1.70E+05 | -1.70E+05 | NULL | AD | Q5T4S7-2 | UBR4     |
| 2265.1 | Hamartin                              | 1.70E+05 | 0.00E+00 | -1.70E+05 | -1.70E+05 | NULL | AD | Q92574   | TSC1     |
| 2269.1 | Melanoma-associated antigen 8         | 1.70E+05 | 0.00E+00 | -1.70E+05 | -1.70E+05 | NULL | AD | P43361   | MAGEA8   |
| 2750.1 | Tetratricopeptide repeat protei       | 1.70E+05 | 0.00E+00 | -1.70E+05 | -1.70E+05 | NULL | AD | G3V3A5   | TTC6     |
| 2988.1 | KH domain-containing, RNA-bin         | 1.70E+05 | 0.00E+00 | -1.70E+05 | -1.70E+05 | NULL | AD | Q5VWX1   | KHDRBS2  |
| 2241.1 | Alpha-2,8-sialyltransferase 8B        | 1.71E+05 | 0.00E+00 | -1.71E+05 | -1.71E+05 | NULL | AD | Q92186   | ST8SIA2  |
|        | 299.2 ATP-citrate synthase            | 1.72E+05 | 0.00E+00 | -1.72E+05 | -1.72E+05 | NULL | AD | B4E3P0   | ACLY     |
| 1048.1 | LDLR chaperone MESD                   | 1.72E+05 | 0.00E+00 | -1.72E+05 | -1.72E+05 | NULL | AD | Q14696   | MESDC2   |
| 2599.1 | Mis18-binding protein 1               | 1.72E+05 | 0.00E+00 | -1.72E+05 | -1.72E+05 | NULL | AD | Q6P0N0   | MIS18BP1 |
| 2172.1 | Copper-transporting ATPase 2          | 1.73E+05 | 0.00E+00 | -1.73E+05 | -1.73E+05 | NULL | AD | P35670   | ATP7B    |
| 2324.1 | Membrane-associated guanylat          | 1.73E+05 | 0.00E+00 | -1.73E+05 | -1.73E+05 | NULL | AD | Q96QZ7   | MAGI1    |
|        | 7.2 Filamin-C                         | 1.74E+05 | 0.00E+00 | -1.74E+05 | -1.74E+05 | NULL | AD | Q14315   | FLNC     |
| 2835.1 | Protein cramped-like                  | 1.74E+05 | 0.00E+00 | -1.74E+05 | -1.74E+05 | NULL | AD | J3KR07   | CRAMP1L  |
|        | 697.1 Protein arginine N-methyltransf | 1.76E+05 | 0.00E+00 | -1.76E+05 | -1.76E+05 | NULL | AD | O14744   | PRMT5    |
| 2445.1 | Period circadian protein homolc       | 1.77E+05 | 0.00E+00 | -1.77E+05 | -1.77E+05 | NULL | AD | O15534   | PER1     |
| 2733.1 | Isoform 4 of DNA helicase MCM         | 1.77E+05 | 0.00E+00 | -1.77E+05 | -1.77E+05 | NULL | AD | Q9UJA3-4 | MCM8     |
| 2841.1 | Transmembrane emp24 domain            | 1.77E+05 | 0.00E+00 | -1.77E+05 | -1.77E+05 | NULL | AD | Q9Y3A6   | TMED5    |

|        |                                   |          |          |           |           |      |    |          |          |
|--------|-----------------------------------|----------|----------|-----------|-----------|------|----|----------|----------|
| 1803.1 | Synaptotagmin-like protein 4      | 1.78E+05 | 0.00E+00 | -1.78E+05 | -1.78E+05 | NULL | AD | F8W9B9   | SYTL4    |
| 1329.1 | Ubiquitin carboxyl-terminal hyd   | 1.79E+05 | 0.00E+00 | -1.79E+05 | -1.79E+05 | NULL | AD | Q70EL2   | USP45    |
| 3131.1 | SURP and G-patch domain-cont      | 1.80E+05 | 0.00E+00 | -1.80E+05 | -1.80E+05 | NULL | AD | Q8IX01   | SUGP2    |
| 3086.1 | Deoxynucleotidyltransferase ter   | 1.82E+05 | 0.00E+00 | -1.82E+05 | -1.82E+05 | NULL | AD | Q5QJE6   | DNTTIP2  |
| 1073.1 | Pantothenate kinase 4             | 1.84E+05 | 0.00E+00 | -1.84E+05 | -1.84E+05 | NULL | AD | Q9NVE7   | PANK4    |
| 951.1  | Testis-expressed sequence 10 pi   | 1.85E+05 | 0.00E+00 | -1.85E+05 | -1.85E+05 | NULL | AD | Q9NXF1   | TEX10    |
| 2281.1 | EMILIN-2                          | 1.85E+05 | 0.00E+00 | -1.85E+05 | -1.85E+05 | NULL | AD | Q9BXX0   | EMILIN2  |
| 2705.1 | Treacle protein                   | 1.86E+05 | 0.00E+00 | -1.86E+05 | -1.86E+05 | NULL | AD | E9PHK9   | TCOF1    |
| 3125.1 | Isoform 3 of Semaphorin-6C        | 1.86E+05 | 0.00E+00 | -1.86E+05 | -1.86E+05 | NULL | AD | Q9H3T2-3 | SEMA6C   |
| 1676.1 | Zinc finger FYVE domain-contair   | 1.88E+05 | 0.00E+00 | -1.88E+05 | -1.88E+05 | NULL | AD | Q68DK2   | ZFYVE26  |
| 2349.1 | DC-STAMP domain-containing p      | 1.90E+05 | 0.00E+00 | -1.90E+05 | -1.90E+05 | NULL | AD | Q5T1A1   | DCST2    |
| 2641.1 | Probable ATP-dependent RNA h      | 1.90E+05 | 0.00E+00 | -1.90E+05 | -1.90E+05 | NULL | AD | Q8IY37   | DHX37    |
| 3192.1 | Forkhead box protein O4           | 1.90E+05 | 0.00E+00 | -1.90E+05 | -1.90E+05 | NULL | AD | P98177   | FOXO4    |
| 2654.1 | Alpha-2-macroglobulin             | 1.91E+05 | 0.00E+00 | -1.91E+05 | -1.91E+05 | NULL | AD | P01023   | A2M      |
| 2905.1 | Probable tRNA threonylcarbamo     | 1.91E+05 | 0.00E+00 | -1.91E+05 | -1.91E+05 | NULL | AD | Q9NPF4   | OSGEP    |
| 860.1  | Annexin A6                        | 1.92E+05 | 0.00E+00 | -1.92E+05 | -1.92E+05 | NULL | AD | P08133   | ANXA6    |
| 1872.1 | Ferritin light chain              | 1.92E+05 | 0.00E+00 | -1.92E+05 | -1.92E+05 | NULL | AD | P02792   | FTL      |
| 2843.1 | Vacuolar protein sorting-associa  | 1.92E+05 | 0.00E+00 | -1.92E+05 | -1.92E+05 | NULL | AD | Q9H267   | VPS33B   |
| 3037.1 | Transcription factor HIVEP3       | 1.92E+05 | 0.00E+00 | -1.92E+05 | -1.92E+05 | NULL | AD | Q5T1R4   | HIVEP3   |
| 3077.1 | Protein SOGA2                     | 1.93E+05 | 0.00E+00 | -1.93E+05 | -1.93E+05 | NULL | AD | Q9Y4B5   | SOGA2    |
| 2002.1 | Isoform 2 of M-phase phosphop     | 1.94E+05 | 0.00E+00 | -1.94E+05 | -1.94E+05 | NULL | AD | Q99549-2 | MPHOSPH8 |
| 1394.1 | Phosphatidylinositol 3,4,5-trisph | 1.96E+05 | 0.00E+00 | -1.96E+05 | -1.96E+05 | NULL | AD | O15357   | INPPL1   |
| 2159.1 | Testis-expressed sequence 13A     | 1.96E+05 | 0.00E+00 | -1.96E+05 | -1.96E+05 | NULL | AD | Q9BXU3   | TEX13A   |
| 2531.1 | Tumor necrosis factor receptor :  | 1.96E+05 | 0.00E+00 | -1.96E+05 | -1.96E+05 | NULL | AD | P19438   | TNFRSF1A |
| 827.1  | G protein-regulated inducer of r  | 1.97E+05 | 0.00E+00 | -1.97E+05 | -1.97E+05 | NULL | AD | Q6ZVF9   | GPRIN3   |
| 2773.1 | Putative zinc finger protein 705f | 1.97E+05 | 0.00E+00 | -1.97E+05 | -1.97E+05 | NULL | AD | A8MWA4   | ZNF705E  |
| 2968.1 | COMM domain-containing prote      | 1.97E+05 | 0.00E+00 | -1.97E+05 | -1.97E+05 | NULL | AD | Q9Y6G5   | COMMMD10 |
| 2560.1 | Taste receptor type 1 member 1    | 1.98E+05 | 0.00E+00 | -1.98E+05 | -1.98E+05 | NULL | AD | Q7RTX1   | TAS1R1   |
| 2749.1 | Frizzled-10                       | 1.98E+05 | 0.00E+00 | -1.98E+05 | -1.98E+05 | NULL | AD | F5H450   | FZD10    |
| 2851.1 | Glutamate receptor-interacting    | 1.98E+05 | 0.00E+00 | -1.98E+05 | -1.98E+05 | NULL | AD | Q9C0E4   | GRIP2    |
| 2211.1 | Dedicator of cytokinesis protein  | 1.99E+05 | 0.00E+00 | -1.99E+05 | -1.99E+05 | NULL | AD | Q8NF50   | DOCK8    |
| 2283.1 | RUN domain-containing protein     | 1.99E+05 | 0.00E+00 | -1.99E+05 | -1.99E+05 | NULL | AD | Q96NL0   | RUNDC3B  |
| 2239.1 | NudC domain-containing protei     | 2.01E+05 | 0.00E+00 | -2.01E+05 | -2.01E+05 | NULL | AD | Q96RS6   | NUDCD1   |
| 1919.1 | Ephrin type-B receptor 6          | 2.02E+05 | 0.00E+00 | -2.02E+05 | -2.02E+05 | NULL | AD | O15197   | EPHB6    |
| 1446.1 | TMF-regulated nuclear protein :   | 2.03E+05 | 0.00E+00 | -2.03E+05 | -2.03E+05 | NULL | AD | Q6NT89   | TRNP1    |

|        |                                    |          |          |           |           |      |    |          |          |
|--------|------------------------------------|----------|----------|-----------|-----------|------|----|----------|----------|
| 2530.1 | SH2 domain-containing protein      | 2.03E+05 | 0.00E+00 | -2.03E+05 | -2.03E+05 | NULL | AD | Q8N5H7   | SH2D3C   |
| 1667.1 | Otolin-1                           | 2.05E+05 | 0.00E+00 | -2.05E+05 | -2.05E+05 | NULL | AD | A6NHN0   | OTOL1    |
| 2437.1 | Protein SOGA3                      | 2.05E+05 | 0.00E+00 | -2.05E+05 | -2.05E+05 | NULL | AD | Q5TF21   | SOGA3    |
| 2416.1 | Oncoprotein-induced transcript     | 2.06E+05 | 0.00E+00 | -2.06E+05 | -2.06E+05 | NULL | AD | Q8WWZ8   | OIT3     |
| 2876.1 | Chloride channel protein 1         | 2.06E+05 | 0.00E+00 | -2.06E+05 | -2.06E+05 | NULL | AD | P35523   | CLCN1    |
| 638.2  | YTH domain family protein 1        | 2.07E+05 | 0.00E+00 | -2.07E+05 | -2.07E+05 | NULL | AD | Q9BYJ9   | YTHDF1   |
| 1315.1 | Myopalladin                        | 2.07E+05 | 0.00E+00 | -2.07E+05 | -2.07E+05 | NULL | AD | F5GWA6   | MYPN     |
| 2399.1 | Inositol 1,4,5-trisphosphate recep | 2.07E+05 | 0.00E+00 | -2.07E+05 | -2.07E+05 | NULL | AD | Q14571   | ITPR2    |
| 2504.1 | Lactoperoxidase                    | 2.07E+05 | 0.00E+00 | -2.07E+05 | -2.07E+05 | NULL | AD | P22079   | LPO      |
| 2867.1 | Growth hormone-inducible tran      | 2.07E+05 | 0.00E+00 | -2.07E+05 | -2.07E+05 | NULL | AD | Q9H3K2   | GHITM    |
| 1354.1 | Wilms tumor protein 1-interacti    | 2.07E+05 | 0.00E+00 | -2.07E+05 | -2.07E+05 | NULL | AD | A6NIX2   | WTIP     |
| 1725.1 | Steryl-sulfatase                   | 2.08E+05 | 0.00E+00 | -2.08E+05 | -2.08E+05 | NULL | AD | P08842   | STS      |
| 2162.1 | Fibulin-1                          | 2.08E+05 | 0.00E+00 | -2.08E+05 | -2.08E+05 | NULL | AD | F8W7M9   | FBLN1    |
| 2386.1 | Shugoshin-like 2                   | 2.08E+05 | 0.00E+00 | -2.08E+05 | -2.08E+05 | NULL | AD | Q562F6   | SGOL2    |
| 1656.1 | Pancreatic lipase-related protei   | 2.09E+05 | 0.00E+00 | -2.09E+05 | -2.09E+05 | NULL | AD | Q17RR3   | PNLIPRP3 |
| 3189.1 | Transformation/transcription dc    | 2.09E+05 | 0.00E+00 | -2.09E+05 | -2.09E+05 | NULL | AD | Q9Y4A5   | TRRAP    |
| 1674.1 | Isoform 11 of Peroxisomal N(1)-    | 2.10E+05 | 0.00E+00 | -2.10E+05 | -2.10E+05 | NULL | AD | Q6QHF9-9 | PAOX     |
| 3084.1 | PWWP domain-containing prote       | 2.10E+05 | 0.00E+00 | -2.10E+05 | -2.10E+05 | NULL | AD | Q96N64   | PWWP2A   |
| 3065.1 | Histone-lysine N-methyltransfer    | 2.11E+05 | 0.00E+00 | -2.11E+05 | -2.11E+05 | NULL | AD | Q96L73   | NSD1     |
| 894.1  | Plastin-3                          | 2.12E+05 | 0.00E+00 | -2.12E+05 | -2.12E+05 | NULL | AD | P13797   | PLS3     |
| 1181.1 | Zinc finger CCCH-type antiviral p  | 2.12E+05 | 0.00E+00 | -2.12E+05 | -2.12E+05 | NULL | AD | C9J6P4   | ZC3HAV1  |
| 1214.1 | Meckelin                           | 2.12E+05 | 0.00E+00 | -2.12E+05 | -2.12E+05 | NULL | AD | Q5HYA8   | TMEM67   |
| 1235.1 | Nucleosome assembly protein 1      | 2.12E+05 | 0.00E+00 | -2.12E+05 | -2.12E+05 | NULL | AD | Q9ULW6   | NAP1L2   |
| 1576.1 | SUMO-interacting motif-contair     | 2.12E+05 | 0.00E+00 | -2.12E+05 | -2.12E+05 | NULL | AD | Q8NDZ2   | SIMC1    |
| 2650.1 | Maternal embryonic leucine zipi    | 2.13E+05 | 0.00E+00 | -2.13E+05 | -2.13E+05 | NULL | AD | Q14680   | MELK     |
| 2563.1 | Euchromatic histone-lysine N-m     | 2.14E+05 | 0.00E+00 | -2.14E+05 | -2.14E+05 | NULL | AD | B0UZY1   | EHMT2    |
| 2944.1 | DIS3-like exonuclease 1            | 2.14E+05 | 0.00E+00 | -2.14E+05 | -2.14E+05 | NULL | AD | Q8TF46   | DIS3L    |
| 3009.1 | Isoform 7 of Protein PRRC2C        | 2.14E+05 | 0.00E+00 | -2.14E+05 | -2.14E+05 | NULL | AD | Q9Y520-7 | PRRC2C   |
| 911.1  | Ribonuclease H2 subunit A          | 2.16E+05 | 0.00E+00 | -2.16E+05 | -2.16E+05 | NULL | AD | O75792   | RNASEH2A |
| 2196.1 | Sodium channel and clathrin linl   | 2.17E+05 | 0.00E+00 | -2.17E+05 | -2.17E+05 | NULL | AD | Q96NL6   | SCLT1    |
| 2282.1 | Dolichyl-diphosphooligosacchar     | 2.18E+05 | 0.00E+00 | -2.18E+05 | -2.18E+05 | NULL | AD | P04843   | RPN1     |
| 573.1  | Isoform 2 of COP9 signalosome      | 2.19E+05 | 0.00E+00 | -2.19E+05 | -2.19E+05 | NULL | AD | Q13098-7 | GPS1     |
| 617.1  | Dynamin-1                          | 2.19E+05 | 0.00E+00 | -2.19E+05 | -2.19E+05 | NULL | AD | Q05193   | DNM1     |
| 1282.1 | Protein Daple                      | 2.19E+05 | 0.00E+00 | -2.19E+05 | -2.19E+05 | NULL | AD | Q9P219   | CCDC88C  |
| 1850.1 | Death-inducer obliterator 1        | 2.19E+05 | 0.00E+00 | -2.19E+05 | -2.19E+05 | NULL | AD | Q9BTC0   | DIDO1    |

|        |                                    |          |          |           |           |      |    |          |         |
|--------|------------------------------------|----------|----------|-----------|-----------|------|----|----------|---------|
| 1096.1 | Zinc finger protein 461            | 2.20E+05 | 0.00E+00 | -2.20E+05 | -2.20E+05 | NULL | AD | Q8TAF7   | ZNF461  |
| 3122.1 | Protein PAT1 homolog 1             | 2.20E+05 | 0.00E+00 | -2.20E+05 | -2.20E+05 | NULL | AD | Q86TB9   | PATL1   |
| 1917.1 | Erythrocyte band 7 integral mer    | 2.21E+05 | 0.00E+00 | -2.21E+05 | -2.21E+05 | NULL | AD | P27105   | STOM    |
| 2029.1 | Zinc finger protein 500            | 2.21E+05 | 0.00E+00 | -2.21E+05 | -2.21E+05 | NULL | AD | O60304   | ZNF500  |
| 2935.1 | Paired box protein Pax-5           | 2.21E+05 | 0.00E+00 | -2.21E+05 | -2.21E+05 | NULL | AD | E7ERK2   | PAX5    |
| 1532.1 | Choline-phosphate cytidyltran      | 2.22E+05 | 0.00E+00 | -2.22E+05 | -2.22E+05 | NULL | AD | C9JEJ2   | PCYT1A  |
| 1959.1 | Myosin-8                           | 2.22E+05 | 0.00E+00 | -2.22E+05 | -2.22E+05 | NULL | AD | P13535   | MYH8    |
| 2244.1 | 28S ribosomal protein S22, mito    | 2.22E+05 | 0.00E+00 | -2.22E+05 | -2.22E+05 | NULL | AD | P82650   | MRPS22  |
| 2464.1 | Acyl-coenzyme A thioesterase 8     | 2.22E+05 | 0.00E+00 | -2.22E+05 | -2.22E+05 | NULL | AD | O14734   | ACOT8   |
| 2941.1 | Coiled-coil domain-containing p    | 2.23E+05 | 0.00E+00 | -2.23E+05 | -2.23E+05 | NULL | AD | Q9UL16   | CCDC19  |
| 1477.1 | Cyclin-dependent kinase 3          | 2.25E+05 | 0.00E+00 | -2.25E+05 | -2.25E+05 | NULL | AD | Q00526   | CDK3    |
| 2566.1 | Protocadherin Fat 3                | 2.27E+05 | 0.00E+00 | -2.27E+05 | -2.27E+05 | NULL | AD | Q8TDW7   | FAT3    |
| 2667.1 | Secreted phosphoprotein 24         | 2.27E+05 | 0.00E+00 | -2.27E+05 | -2.27E+05 | NULL | AD | Q13103   | SPP2    |
| 2795.1 | WD repeat-containing protein 2     | 2.27E+05 | 0.00E+00 | -2.27E+05 | -2.27E+05 | NULL | AD | Q8TBZ3   | WDR20   |
| 1203.1 | Isoform 2 of BRCA2 and CDKN1A      | 2.28E+05 | 0.00E+00 | -2.28E+05 | -2.28E+05 | NULL | AD | Q9P287-2 | BCCIP   |
| 2901.1 | CUB domain-containing protein      | 2.28E+05 | 0.00E+00 | -2.28E+05 | -2.28E+05 | NULL | AD | Q9H5V8   | CDCP1   |
| 2035.1 | Insulinoma-associated protein 2    | 2.29E+05 | 0.00E+00 | -2.29E+05 | -2.29E+05 | NULL | AD | Q96T92   | INSM2   |
| 1706.1 | Zinc finger protein 667            | 2.31E+05 | 0.00E+00 | -2.31E+05 | -2.31E+05 | NULL | AD | E7EPS0   | ZNF667  |
| 2369.1 | Truncated apolipoprotein C-I       | 2.31E+05 | 0.00E+00 | -2.31E+05 | -2.31E+05 | NULL | AD | K7EPF9   | APOC1   |
| 1171.1 | Isoform 2 of Nuclear factor relat  | 2.32E+05 | 0.00E+00 | -2.32E+05 | -2.32E+05 | NULL | AD | Q6P4R8-2 | NFRKB   |
| 2168.1 | Integrin alpha-1                   | 2.32E+05 | 0.00E+00 | -2.32E+05 | -2.32E+05 | NULL | AD | P56199   | ITGA1   |
| 2631.1 | Isoform 3 of Fanconi anemia-as     | 2.32E+05 | 0.00E+00 | -2.32E+05 | -2.32E+05 | NULL | AD | Q6NZ36-3 | FAAP20  |
| 2169.1 | Zinc finger protein 280B           | 2.33E+05 | 0.00E+00 | -2.33E+05 | -2.33E+05 | NULL | AD | Q86YH2   | ZNF280B |
| 1852.1 | Sodium-dependent neutral amir      | 2.34E+05 | 0.00E+00 | -2.34E+05 | -2.34E+05 | NULL | AD | Q9H1V8   | SLC6A17 |
| 2285.1 | Paired mesoderm homeobox pr        | 2.35E+05 | 0.00E+00 | -2.35E+05 | -2.35E+05 | NULL | AD | Q99453   | PHOX2B  |
| 3245.1 | Lethal(2) giant larvae protein hc  | 2.35E+05 | 0.00E+00 | -2.35E+05 | -2.35E+05 | NULL | AD | Q6P1M3   | LLGL2   |
| 2813.1 | H/ACA ribonucleoprotein compl      | 2.35E+05 | 0.00E+00 | -2.35E+05 | -2.35E+05 | NULL | AD | Q96HR8   | NAF1    |
| 2746.1 | Isoform 2 of Ubiquitin conjugati   | 2.36E+05 | 0.00E+00 | -2.36E+05 | -2.36E+05 | NULL | AD | Q14139-2 | UBE4A   |
| 3.6    | Keratin, type II cytoskeletal 2 or | 2.37E+05 | 0.00E+00 | -2.37E+05 | -2.37E+05 | NULL | AD | Q01546   | KRT76   |
| 1914.1 | Zinc finger protein 567            | 2.37E+05 | 0.00E+00 | -2.37E+05 | -2.37E+05 | NULL | AD | Q8N184   | ZNF567  |
| 21.3   | Tropomyosin 2 (Beta)               | 2.38E+05 | 0.00E+00 | -2.38E+05 | -2.38E+05 | NULL | AD | Q5TCU8   | TPM2    |
| 1404.1 | Zinc finger protein 64 homolog,    | 2.38E+05 | 0.00E+00 | -2.38E+05 | -2.38E+05 | NULL | AD | Q9NTW7   | ZFP64   |
| 993.1  | Baculoviral IAP repeat-containin   | 2.39E+05 | 0.00E+00 | -2.39E+05 | -2.39E+05 | NULL | AD | Q13490   | BIRC2   |
| 1013.1 | Ankyrin repeat and SOCS box pr     | 2.40E+05 | 0.00E+00 | -2.40E+05 | -2.40E+05 | NULL | AD | J3KQJ5   | ASB10   |
| 1460.1 | Fibrous sheath-interacting prote   | 2.40E+05 | 0.00E+00 | -2.40E+05 | -2.40E+05 | NULL | AD | J3QTJ6   | FSIP2   |

|        |                                  |          |          |           |           |      |    |          |          |
|--------|----------------------------------|----------|----------|-----------|-----------|------|----|----------|----------|
| 1880.1 | Transmembrane protein 176A       | 2.43E+05 | 0.00E+00 | -2.43E+05 | -2.43E+05 | NULL | AD | Q96HP8   | TMEM176A |
| 2547.1 | Tyrosine-protein kinase Fes/Fps  | 2.44E+05 | 0.00E+00 | -2.44E+05 | -2.44E+05 | NULL | AD | P07332   | FES      |
| 2721.1 | Zinc finger protein 99           | 2.44E+05 | 0.00E+00 | -2.44E+05 | -2.44E+05 | NULL | AD | A8MXY4   | ZNF99    |
| 1641.1 | Guanine nucleotide-binding pro   | 2.46E+05 | 0.00E+00 | -2.46E+05 | -2.46E+05 | NULL | AD | P19086   | GNAZ     |
| 1883.1 | Protein FAM65C                   | 2.47E+05 | 0.00E+00 | -2.47E+05 | -2.47E+05 | NULL | AD | F5H0X2   | FAM65C   |
| 2329.1 | SUMO-activating enzyme subun     | 2.48E+05 | 0.00E+00 | -2.48E+05 | -2.48E+05 | NULL | AD | Q9UBT2   | UBA2     |
| 1905.1 | Protein phosphatase 1 regulato   | 2.49E+05 | 0.00E+00 | -2.49E+05 | -2.49E+05 | NULL | AD | Q13522   | PPP1R1A  |
| 3062.1 | Isoform 3 of SH3-containing GRI  | 2.49E+05 | 0.00E+00 | -2.49E+05 | -2.49E+05 | NULL | AD | Q9BQI5-3 | SGIP1    |
| 941.1  | Nucleolar pre-ribosomal-associa  | 2.50E+05 | 0.00E+00 | -2.50E+05 | -2.50E+05 | NULL | AD | O60287   | URB1     |
| 2719.1 | Phosphorylated adapter RNA ex    | 2.50E+05 | 0.00E+00 | -2.50E+05 | -2.50E+05 | NULL | AD | Q9H814   | PHAX     |
| 629.1  | tRNA-splicing endonuclease sub   | 2.51E+05 | 0.00E+00 | -2.51E+05 | -2.51E+05 | NULL | AD | E7EQB3   | TSEN34   |
| 2043.1 | Zinc finger protein ubi-d4       | 2.53E+05 | 0.00E+00 | -2.53E+05 | -2.53E+05 | NULL | AD | J3KMZ8   | DPF2     |
| 3238.1 | Lysine-specific demethylase 5A   | 2.53E+05 | 0.00E+00 | -2.53E+05 | -2.53E+05 | NULL | AD | P29375   | KDM5A    |
| 1137.1 | T-lymphoma invasion and meta:    | 2.59E+05 | 0.00E+00 | -2.59E+05 | -2.59E+05 | NULL | AD | Q13009   | TIAM1    |
| 1248.1 | Isoform 2 of LIM and SH3 domai   | 2.59E+05 | 0.00E+00 | -2.59E+05 | -2.59E+05 | NULL | AD | Q14847-2 | LASP1    |
| 1342.1 | Ankyrin repeat domain-containi   | 2.59E+05 | 0.00E+00 | -2.59E+05 | -2.59E+05 | NULL | AD | Q6UB99   | ANKRD11  |
| 1669.1 | Isoform 2 of Diphosphoinositol   | 2.59E+05 | 0.00E+00 | -2.59E+05 | -2.59E+05 | NULL | AD | Q9NZJ9-2 | NUDT4    |
| 2316.1 | Coiled-coil and C2 domain-conta  | 2.59E+05 | 0.00E+00 | -2.59E+05 | -2.59E+05 | NULL | AD | Q6P1N0   | CC2D1A   |
| 3156.1 | Transcription factor Dp-1        | 2.60E+05 | 0.00E+00 | -2.60E+05 | -2.60E+05 | NULL | AD | F5H452   | TFDP1    |
| 2089.1 | E3 ubiquitin-protein ligase RNF1 | 2.62E+05 | 0.00E+00 | -2.62E+05 | -2.62E+05 | NULL | AD | Q96K19   | RNF170   |
| 523.1  | Cyclin-dependent kinase 1        | 2.63E+05 | 0.00E+00 | -2.63E+05 | -2.63E+05 | NULL | AD | P06493   | CDK1     |
| 1259.1 | Rho-associated protein kinase 2  | 2.63E+05 | 0.00E+00 | -2.63E+05 | -2.63E+05 | NULL | AD | O75116   | ROCK2    |
| 1545.1 | BTB/POZ domain-containing prc    | 2.64E+05 | 0.00E+00 | -2.64E+05 | -2.64E+05 | NULL | AD | Q9BQ13   | KCTD14   |
| 2642.1 | Isoform 2 of MORN repeat-cont    | 2.64E+05 | 0.00E+00 | -2.64E+05 | -2.64E+05 | NULL | AD | Q8NDC4-2 | MORN4    |
| 1721.1 | Vasoactive intestinal polypeptid | 2.65E+05 | 0.00E+00 | -2.65E+05 | -2.65E+05 | NULL | AD | E9PCR5   | VIPR2    |
| 1462.1 | A-kinase anchor protein 8        | 2.66E+05 | 0.00E+00 | -2.66E+05 | -2.66E+05 | NULL | AD | O43823   | AKAP8    |
| 1437.1 | Phosphatidylinositol 4-phosphat  | 2.68E+05 | 0.00E+00 | -2.68E+05 | -2.68E+05 | NULL | AD | O00750   | PIK3C2B  |
| 3081.1 | Sodium/hydrogen exchanger 3      | 2.69E+05 | 0.00E+00 | -2.69E+05 | -2.69E+05 | NULL | AD | P48764   | SLC9A3   |
| 3206.1 | Neurexin-1-beta                  | 2.69E+05 | 0.00E+00 | -2.69E+05 | -2.69E+05 | NULL | AD | P58400   | NRXN1    |
| 9.3    | Tubulin beta-2B chain            | 2.71E+05 | 0.00E+00 | -2.71E+05 | -2.71E+05 | NULL | AD | Q9BVA1   | TUBB2B   |
| 1594.1 | EGF-like module-containing muc   | 2.71E+05 | 0.00E+00 | -2.71E+05 | -2.71E+05 | NULL | AD | Q14246   | EMR1     |
| 2656.1 | Isoform 3 of Coiled-coil domain- | 2.71E+05 | 0.00E+00 | -2.71E+05 | -2.71E+05 | NULL | AD | Q6TFL3-4 | CCDC171  |
| 937.1  | Centrosomal protein of 128 kDa   | 2.72E+05 | 0.00E+00 | -2.72E+05 | -2.72E+05 | NULL | AD | Q6ZU80   | CEP128   |
| 1552.1 | Rho GTPase-activating protein 3  | 2.72E+05 | 0.00E+00 | -2.72E+05 | -2.72E+05 | NULL | AD | Q2M1Z3   | ARHGAP31 |
| 2572.1 | Zinc finger protein 549          | 2.72E+05 | 0.00E+00 | -2.72E+05 | -2.72E+05 | NULL | AD | Q6P9A3   | ZNF549   |

|        |                                   |          |          |           |           |      |    |          |          |
|--------|-----------------------------------|----------|----------|-----------|-----------|------|----|----------|----------|
| 913.1  | Ferritin heavy polypeptide-like 1 | 2.75E+05 | 0.00E+00 | -2.75E+05 | -2.75E+05 | NULL | AD | Q9BXU8   | FTHL17   |
| 1225.1 | Lipoma-preferred partner          | 2.76E+05 | 0.00E+00 | -2.76E+05 | -2.76E+05 | NULL | AD | Q93052   | LPP      |
| 1596.1 | Charged multivesicular body prc   | 2.76E+05 | 0.00E+00 | -2.76E+05 | -2.76E+05 | NULL | AD | Q9H444   | CHMP4B   |
| 1619.1 | UPF0489 protein C5orf22           | 2.77E+05 | 0.00E+00 | -2.77E+05 | -2.77E+05 | NULL | AD | B4DR92   | C5orf22  |
| 2556.1 | Nik-related protein kinase        | 2.77E+05 | 0.00E+00 | -2.77E+05 | -2.77E+05 | NULL | AD | F5H049   | NRK      |
| 3104.1 | UHRF1-binding protein 1           | 2.77E+05 | 0.00E+00 | -2.77E+05 | -2.77E+05 | NULL | AD | Q6BDS2   | UHRF1BP1 |
| 1507.1 | Disintegrin and metalloproteina   | 2.77E+05 | 0.00E+00 | -2.77E+05 | -2.77E+05 | NULL | AD | P78325   | ADAM8    |
| 3111.1 | Polyadenylate-binding protein 5   | 2.78E+05 | 0.00E+00 | -2.78E+05 | -2.78E+05 | NULL | AD | Q96DU9   | PABPC5   |
| 2362.1 | Isoform 2 of TNF receptor-assoc   | 2.80E+05 | 0.00E+00 | -2.80E+05 | -2.80E+05 | NULL | AD | Q12933-2 | TRAF2    |
| 1835.1 | AP20 region protein 1             | 2.81E+05 | 0.00E+00 | -2.81E+05 | -2.81E+05 | NULL | AD | Q8IVJ8   | APRG1    |
| 2551.1 | Coiled-coil domain-containing p   | 2.81E+05 | 0.00E+00 | -2.81E+05 | -2.81E+05 | NULL | AD | Q8ND07   | CCDC176  |
| 2373.1 | ETS translocation variant 3       | 2.82E+05 | 0.00E+00 | -2.82E+05 | -2.82E+05 | NULL | AD | P41162   | ETV3     |
| 740.1  | Chromosome 1 open reading fra     | 2.83E+05 | 0.00E+00 | -2.83E+05 | -2.83E+05 | NULL | AD | Q5VSH5   | C1orf122 |
| 2797.1 | Uroporphyrinogen decarboxylas     | 2.83E+05 | 0.00E+00 | -2.83E+05 | -2.83E+05 | NULL | AD | P06132   | UROD     |
| 2846.1 | Forkhead box protein D1           | 2.83E+05 | 0.00E+00 | -2.83E+05 | -2.83E+05 | NULL | AD | J3KT45   | FOXD1    |
| 2859.1 | 1,4-alpha-glucan-branching enzy   | 2.83E+05 | 0.00E+00 | -2.83E+05 | -2.83E+05 | NULL | AD | Q04446   | GBE1     |
| 2784.1 | Putative U6 snRNA phosphodies     | 2.84E+05 | 0.00E+00 | -2.84E+05 | -2.84E+05 | NULL | AD | Q9BQ65   | USB1     |
| 1582.1 | Polypeptide N-acetylgalactosam    | 2.86E+05 | 0.00E+00 | -2.86E+05 | -2.86E+05 | NULL | AD | Q8IXK2   | GALNT12  |
| 2311.1 | Killer cell immunoglobulin-like r | 2.88E+05 | 0.00E+00 | -2.88E+05 | -2.88E+05 | NULL | AD | Q8NHK3   | KIR2DL5B |
| 2013.1 | Envoplakin                        | 2.90E+05 | 0.00E+00 | -2.90E+05 | -2.90E+05 | NULL | AD | K7EKI0   | EVPL     |
| 1536.1 | Adapter molecule crk              | 2.91E+05 | 0.00E+00 | -2.91E+05 | -2.91E+05 | NULL | AD | P46108   | CRK      |
| 1175.1 | Protein FAM217B                   | 2.93E+05 | 0.00E+00 | -2.93E+05 | -2.93E+05 | NULL | AD | Q9NTX9   | FAM217B  |
| 2108.1 | RRP12-like protein                | 2.93E+05 | 0.00E+00 | -2.93E+05 | -2.93E+05 | NULL | AD | Q5JTH9   | RRP12    |
| 2499.1 | Quinone oxidoreductase PIG3       | 2.93E+05 | 0.00E+00 | -2.93E+05 | -2.93E+05 | NULL | AD | Q53FA7   | TP53I3   |
| 3178.1 | Isoform 2 of Transcription facto  | 2.94E+05 | 0.00E+00 | -2.94E+05 | -2.94E+05 | NULL | AD | Q33E94-2 | RFX4     |
| 2995.1 | O-acetyl-ADP-ribose deacetylase   | 2.96E+05 | 0.00E+00 | -2.96E+05 | -2.96E+05 | NULL | AD | Q9Y530   | OARD1    |
| 3141.1 | Breast cancer anti-estrogen resi  | 2.98E+05 | 0.00E+00 | -2.98E+05 | -2.98E+05 | NULL | AD | Q05GC8   | BCAR2    |
| 1345.1 | Cytokine inducible SH2-containi   | 3.00E+05 | 0.00E+00 | -3.00E+05 | -3.00E+05 | NULL | AD | Q9NSE2   | CISH     |
| 1834.1 | DNA-binding protein RFX8          | 3.03E+05 | 0.00E+00 | -3.03E+05 | -3.03E+05 | NULL | AD | Q6ZV50   | RFX8     |
| 943.1  | Obscurin                          | 3.05E+05 | 0.00E+00 | -3.05E+05 | -3.05E+05 | NULL | AD | H3BPX2   | OBSCN    |
| 2578.1 | Dynein heavy chain 1, axonemal    | 3.05E+05 | 0.00E+00 | -3.05E+05 | -3.05E+05 | NULL | AD | Q9P2D7   | DNAH1    |
| 2363.1 | Multimerin-1                      | 3.08E+05 | 0.00E+00 | -3.08E+05 | -3.08E+05 | NULL | AD | Q13201   | MMRN1    |
| 1693.1 | Ankyrin repeat domain-containi    | 3.11E+05 | 0.00E+00 | -3.11E+05 | -3.11E+05 | NULL | AD | Q69YU3   | ANKRD34A |
| 855.1  | Golgin subfamily A member 3       | 3.12E+05 | 0.00E+00 | -3.12E+05 | -3.12E+05 | NULL | AD | Q08378   | GOLGA3   |
| 1008.1 | UDP-GlcNAc:betaGal beta-1,3-N     | 3.12E+05 | 0.00E+00 | -3.12E+05 | -3.12E+05 | NULL | AD | Q8NFL0   | B3GNT7   |

|        |                                  |          |          |           |           |      |    |          |          |
|--------|----------------------------------|----------|----------|-----------|-----------|------|----|----------|----------|
| 1653.1 | Vacuolar protein sorting-associ  | 3.12E+05 | 0.00E+00 | -3.12E+05 | -3.12E+05 | NULL | AD | Q9P1Q0   | VPS54    |
| 2691.1 | DNA ligase 1                     | 3.14E+05 | 0.00E+00 | -3.14E+05 | -3.14E+05 | NULL | AD | P18858   | LIG1     |
| 1862.1 | Protein YIPF4                    | 3.15E+05 | 0.00E+00 | -3.15E+05 | -3.15E+05 | NULL | AD | Q9BSR8   | YIPF4    |
| 10.2   | Clathrin heavy chain 2           | 3.16E+05 | 0.00E+00 | -3.16E+05 | -3.16E+05 | NULL | AD | P53675   | CLTCL1   |
| 708.1  | Na(+)/H(+) exchange regulatory   | 3.16E+05 | 0.00E+00 | -3.16E+05 | -3.16E+05 | NULL | AD | O14745   | SLC9A3R1 |
| 1504.1 | UBX domain-containing protein    | 3.16E+05 | 0.00E+00 | -3.16E+05 | -3.16E+05 | NULL | AD | Q14CS0   | UBXN2B   |
| 2669.1 | FtsJ methyltransferase domain-c  | 3.18E+05 | 0.00E+00 | -3.18E+05 | -3.18E+05 | NULL | AD | Q8IYT2   | FTSJD1   |
| 3140.1 | Homeobox protein MOX-2           | 3.18E+05 | 0.00E+00 | -3.18E+05 | -3.18E+05 | NULL | AD | P50222   | MEOX2    |
| 1974.1 | Heat shock protein beta-3        | 3.20E+05 | 0.00E+00 | -3.20E+05 | -3.20E+05 | NULL | AD | Q12988   | HSPB3    |
| 943.3  | Obscurin                         | 3.21E+05 | 0.00E+00 | -3.21E+05 | -3.21E+05 | NULL | AD | H7BY31   | OBSCN    |
| 1250.1 | HERV-K_3q12.3 provirus ancesti   | 3.21E+05 | 0.00E+00 | -3.21E+05 | -3.21E+05 | NULL | AD | Q9HDB9   | ERVK-5   |
| 1930.1 | Anoctamin-5                      | 3.23E+05 | 0.00E+00 | -3.23E+05 | -3.23E+05 | NULL | AD | Q75V66   | ANO5     |
| 1506.1 | Isoform 6 of Calcium/calmodulir  | 3.24E+05 | 0.00E+00 | -3.24E+05 | -3.24E+05 | NULL | AD | Q13555-6 | CAMK2G   |
| 1750.1 | Sentrin-specific protease 1      | 3.25E+05 | 0.00E+00 | -3.25E+05 | -3.25E+05 | NULL | AD | Q9P0U3   | SENP1    |
| 2011.1 | PHD and RING finger domain-co    | 3.25E+05 | 0.00E+00 | -3.25E+05 | -3.25E+05 | NULL | AD | Q9P1Y6   | PHRF1    |
| 2376.1 | Isoform 4 of Tether containing L | 3.27E+05 | 0.00E+00 | -3.27E+05 | -3.27E+05 | NULL | AD | Q9BZE9-4 | ASPSCR1  |
| 1731.1 | Dendritic cell nuclear protein 1 | 3.28E+05 | 0.00E+00 | -3.28E+05 | -3.28E+05 | NULL | AD | Q8TF63   | DCNP1    |
| 2679.1 | Isoform 5 of Bromodomain-cont    | 3.29E+05 | 0.00E+00 | -3.29E+05 | -3.29E+05 | NULL | AD | Q9H8M2-1 | BRD9     |
| 709.1  | Isoform 3 of Clathrin interactor | 3.30E+05 | 0.00E+00 | -3.30E+05 | -3.30E+05 | NULL | AD | Q14677-3 | CLINT1   |
| 1657.1 | Frizzled-3                       | 3.30E+05 | 0.00E+00 | -3.30E+05 | -3.30E+05 | NULL | AD | Q9NPG1   | FZD3     |
| 1239.1 | Chromosome-associated kinesir    | 3.31E+05 | 0.00E+00 | -3.31E+05 | -3.31E+05 | NULL | AD | Q2VIQ3   | KIF4B    |
| 2136.1 | CAAX prenyl protease 1 homolo    | 3.31E+05 | 0.00E+00 | -3.31E+05 | -3.31E+05 | NULL | AD | O75844   | ZMPSTE24 |
| 2618.1 | ATP-binding cassette sub-family  | 3.31E+05 | 0.00E+00 | -3.31E+05 | -3.31E+05 | NULL | AD | Q9UBJ2   | ABCD2    |
| 1413.1 | Olfactory receptor 52B6          | 3.32E+05 | 0.00E+00 | -3.32E+05 | -3.32E+05 | NULL | AD | Q8NGF0   | OR52B6   |
| 2565.1 | Protein DBF4 homolog A           | 3.32E+05 | 0.00E+00 | -3.32E+05 | -3.32E+05 | NULL | AD | Q9UBU7   | DBF4     |
| 1138.1 | Inner centromere protein         | 3.33E+05 | 0.00E+00 | -3.33E+05 | -3.33E+05 | NULL | AD | Q9NQS7   | INCENP   |
| 2325.1 | Olfactory receptor 14J1          | 3.36E+05 | 0.00E+00 | -3.36E+05 | -3.36E+05 | NULL | AD | Q9UGF5   | OR14J1   |
| 2144.1 | V-set and immunoglobulin domi    | 3.37E+05 | 0.00E+00 | -3.37E+05 | -3.37E+05 | NULL | AD | Q9Y279   | VSIG4    |
| 2266.1 | Protein FAM184B                  | 3.37E+05 | 0.00E+00 | -3.37E+05 | -3.37E+05 | NULL | AD | Q9ULE4   | FAM184B  |
| 1711.1 | Macrophage metalloelastase       | 3.39E+05 | 0.00E+00 | -3.39E+05 | -3.39E+05 | NULL | AD | P39900   | MMP12    |
| 1765.1 | Probable G-protein coupled rec   | 3.39E+05 | 0.00E+00 | -3.39E+05 | -3.39E+05 | NULL | AD | Q6PRD1   | GPR179   |
| 890.1  | Isoform 2 of Allograft inflammat | 3.40E+05 | 0.00E+00 | -3.40E+05 | -3.40E+05 | NULL | AD | Q9BQI0-2 | AIF1L    |
| 2027.1 | F-box/LRR-repeat protein 5       | 3.40E+05 | 0.00E+00 | -3.40E+05 | -3.40E+05 | NULL | AD | Q9UKA1   | FBXL5    |
| 2605.1 | Kinesin-like protein KIF19       | 3.40E+05 | 0.00E+00 | -3.40E+05 | -3.40E+05 | NULL | AD | Q2TAC6   | KIF19    |
| 1475.1 | Collagen alpha-6(VI) chain       | 3.41E+05 | 0.00E+00 | -3.41E+05 | -3.41E+05 | NULL | AD | F8W6Y7   | COL6A6   |

|        |                                                                      |          |          |           |           |      |    |          |          |
|--------|----------------------------------------------------------------------|----------|----------|-----------|-----------|------|----|----------|----------|
| 2822.1 | Radial spoke head protein 3 hor                                      | 3.41E+05 | 0.00E+00 | -3.41E+05 | -3.41E+05 | NULL | AD | Q86UC2   | RSPH3    |
| 2295.1 | Probable tubulin polyglutamylase                                     | 3.43E+05 | 0.00E+00 | -3.43E+05 | -3.43E+05 | NULL | AD | O95922   | TLL1     |
| 2338.1 | Cytoplasmic tyrosine-protein kinase                                  | 3.43E+05 | 0.00E+00 | -3.43E+05 | -3.43E+05 | NULL | AD | P51813   | BMX      |
| 2742.1 | PI-PLC X domain-containing protein                                   | 3.43E+05 | 0.00E+00 | -3.43E+05 | -3.43E+05 | NULL | AD | Q0VAA5   | PLCXD2   |
| 2864.1 | Cyclin-dependent kinase 11B                                          | 3.44E+05 | 0.00E+00 | -3.44E+05 | -3.44E+05 | NULL | AD | P21127   | CDK11B   |
| 1453.1 | Actin-related protein 10                                             | 3.47E+05 | 0.00E+00 | -3.47E+05 | -3.47E+05 | NULL | AD | Q9NZ32   | ACTR10   |
| 1398.1 | Serine/threonine-protein kinase                                      | 3.51E+05 | 0.00E+00 | -3.51E+05 | -3.51E+05 | NULL | AD | P51955   | NEK2     |
| 2059.1 | Sentrin-specific protease 6                                          | 3.51E+05 | 0.00E+00 | -3.51E+05 | -3.51E+05 | NULL | AD | Q9GZR1   | SENP6    |
| 1024.1 | Protein misato homolog 1                                             | 3.52E+05 | 0.00E+00 | -3.52E+05 | -3.52E+05 | NULL | AD | Q9BUK6   | MSTO1    |
| 840.1  | Ubiquitin carboxyl-terminal hydrolase                                | 3.54E+05 | 0.00E+00 | -3.54E+05 | -3.54E+05 | NULL | AD | P45974   | USP5     |
| 1341.1 | Glomulin                                                             | 3.56E+05 | 0.00E+00 | -3.56E+05 | -3.56E+05 | NULL | AD | Q92990   | GLMN     |
| 2115.1 | Zinc finger protein baso-nuclin-1                                    | 3.56E+05 | 0.00E+00 | -3.56E+05 | -3.56E+05 | NULL | AD | Q01954   | BNC1     |
| 1811.1 | Flotillin-2                                                          | 3.57E+05 | 0.00E+00 | -3.57E+05 | -3.57E+05 | NULL | AD | E7EMK3   | FLOT2    |
| 885.1  | Kinesin-like protein KIF26A                                          | 3.59E+05 | 0.00E+00 | -3.59E+05 | -3.59E+05 | NULL | AD | Q9ULI4   | KIF26A   |
| 2509.1 | C3 and PZP-like alpha-2-macroglobulin                                | 3.59E+05 | 0.00E+00 | -3.59E+05 | -3.59E+05 | NULL | AD | Q8IZJ3   | CPAMD8   |
| 2837.1 | Desmoglein-3                                                         | 3.59E+05 | 0.00E+00 | -3.59E+05 | -3.59E+05 | NULL | AD | P32926   | DSG3     |
| 3039.1 | Ubiquitin-associated and SH3 domain protein                          | 3.59E+05 | 0.00E+00 | -3.59E+05 | -3.59E+05 | NULL | AD | Q8TF42   | UBASH3B  |
| 1233.1 | Histone-arginine methyltransferase                                   | 3.62E+05 | 0.00E+00 | -3.62E+05 | -3.62E+05 | NULL | AD | Q86X55   | CARM1    |
| 1206.1 | Latent-transforming growth factor receptor                           | 3.63E+05 | 0.00E+00 | -3.63E+05 | -3.63E+05 | NULL | AD | Q14767   | LTBP2    |
| 2287.1 | 1-aminocyclopropane-1-carboxylate synthase                           | 3.63E+05 | 0.00E+00 | -3.63E+05 | -3.63E+05 | NULL | AD | Q96QU6   | ACCS     |
| 2577.1 | Prickle-like protein 1                                               | 3.63E+05 | 0.00E+00 | -3.63E+05 | -3.63E+05 | NULL | AD | Q96MT3   | PRICKLE1 |
| 2777.1 | Nucleolar transcription factor 1                                     | 3.65E+05 | 0.00E+00 | -3.65E+05 | -3.65E+05 | NULL | AD | E9PKP7   | UBTF     |
| 3252.1 | Ubiquitin carboxyl-terminal hydrolase                                | 3.65E+05 | 0.00E+00 | -3.65E+05 | -3.65E+05 | NULL | AD | Q92995   | USP13    |
| 9.4    | Tubulin beta-3 chain                                                 | 3.69E+05 | 0.00E+00 | -3.69E+05 | -3.69E+05 | NULL | AD | Q13509   | TUBB3    |
| 958.1  | Spindlin-2A                                                          | 3.71E+05 | 0.00E+00 | -3.71E+05 | -3.71E+05 | NULL | AD | Q99865   | SPIN2A   |
| 2037.1 | Procollagen-lysine,2-oxoglutarate 5-lyase                            | 3.74E+05 | 0.00E+00 | -3.74E+05 | -3.74E+05 | NULL | AD | O60568   | PLOD3    |
| 1129.1 | Rap guanine nucleotide exchange factor                               | 3.75E+05 | 0.00E+00 | -3.75E+05 | -3.75E+05 | NULL | AD | O95398   | RAPGEF3  |
| 2424.1 | A-kinase anchor protein 11                                           | 3.76E+05 | 0.00E+00 | -3.76E+05 | -3.76E+05 | NULL | AD | Q9UKA4   | AKAP11   |
| 1339.1 | Isoform SERCA3F of Sarcoplasmic/endoplasmic reticulum calcium ATPase | 3.81E+05 | 0.00E+00 | -3.81E+05 | -3.81E+05 | NULL | AD | Q93084-7 | ATP2A3   |
| 2779.1 | Rho GTPase-activating protein 2                                      | 3.81E+05 | 0.00E+00 | -3.81E+05 | -3.81E+05 | NULL | AD | Q52LW3   | ARHGAP29 |
| 2955.1 | Paired amphipathic helix protein 1                                   | 3.81E+05 | 0.00E+00 | -3.81E+05 | -3.81E+05 | NULL | AD | O75182   | SIN3B    |
| 2232.1 | Isoform 4 of Melanoma-associated protein 1                           | 3.84E+05 | 0.00E+00 | -3.84E+05 | -3.84E+05 | NULL | AD | Q96JG8-4 | MAGED4   |
| 2318.1 | TBC1 domain family member 8B                                         | 3.84E+05 | 0.00E+00 | -3.84E+05 | -3.84E+05 | NULL | AD | Q0IIM8   | TBC1D8B  |
| 1449.1 | Isoform 7 of Tetratricopeptide repeat domain-containing protein      | 3.87E+05 | 0.00E+00 | -3.87E+05 | -3.87E+05 | NULL | AD | Q8NDW8   | TTC21A   |
| 2731.1 | Anterior gradient protein 3 homolog                                  | 3.88E+05 | 0.00E+00 | -3.88E+05 | -3.88E+05 | NULL | AD | Q8TD06   | AGR3     |



|        |                                     |          |          |           |           |      |    |          |          |
|--------|-------------------------------------|----------|----------|-----------|-----------|------|----|----------|----------|
| 1060.1 | MON1 homolog A (Yeast), isofo       | 3.90E+05 | 0.00E+00 | -3.90E+05 | -3.90E+05 | NULL | AD | Q86VX9   | MON1A    |
| 1584.1 | Solute carrier family 15 membe      | 3.93E+05 | 0.00E+00 | -3.93E+05 | -3.93E+05 | NULL | AD | P46059   | SLC15A1  |
| 2737.1 | Centrosomal protein of 192 kDa      | 3.94E+05 | 0.00E+00 | -3.94E+05 | -3.94E+05 | NULL | AD | E9PF99   | CEP192   |
| 2759.1 | A disintegrin and metalloproteir    | 3.94E+05 | 0.00E+00 | -3.94E+05 | -3.94E+05 | NULL | AD | Q9UP79   | ADAMTS8  |
| 2881.1 | Apolipoprotein B-100                | 3.98E+05 | 0.00E+00 | -3.98E+05 | -3.98E+05 | NULL | AD | P04114   | APOB     |
| 1520.1 | Microtubule-associated tumor s      | 4.03E+05 | 0.00E+00 | -4.03E+05 | -4.03E+05 | NULL | AD | J3KQA9   | MTUS2    |
| 1148.1 | Probable ribonuclease ZC3H12D       | 4.04E+05 | 0.00E+00 | -4.04E+05 | -4.04E+05 | NULL | AD | J3QT81   | ZC3H12D  |
| 645.1  | Isoform 5 of Protein piccolo        | 4.05E+05 | 0.00E+00 | -4.05E+05 | -4.05E+05 | NULL | AD | Q9Y6V0-5 | PCLO     |
| 3068.1 | Kinesin heavy chain isoform 5A      | 4.08E+05 | 0.00E+00 | -4.08E+05 | -4.08E+05 | NULL | AD | Q12840   | KIF5A    |
| 318.2  | Vacuolar protein sorting-associa    | 4.09E+05 | 0.00E+00 | -4.09E+05 | -4.09E+05 | NULL | AD | Q9UN37   | VPS4A    |
| 2180.1 | Intraflagellar transport protein 1  | 4.11E+05 | 0.00E+00 | -4.11E+05 | -4.11E+05 | NULL | AD | Q9UG01   | IFT172   |
| 3138.1 | Ciliary neurotrophic factor recep   | 4.13E+05 | 0.00E+00 | -4.13E+05 | -4.13E+05 | NULL | AD | P26992   | CNTFR    |
| 2052.1 | Translation initiation factor IF-2, | 4.16E+05 | 0.00E+00 | -4.16E+05 | -4.16E+05 | NULL | AD | P46199   | MTIF2    |
| 3235.1 | Zinc finger CW-type PWWP dom        | 4.17E+05 | 0.00E+00 | -4.17E+05 | -4.17E+05 | NULL | AD | Q504Y3   | ZCWPW2   |
| 1680.1 | COBW domain-containing prote        | 4.20E+05 | 0.00E+00 | -4.20E+05 | -4.20E+05 | NULL | AD | Q5RIA9   | CBWD5    |
| 3242.1 | DNA polymerase delta subunit 3      | 4.24E+05 | 0.00E+00 | -4.24E+05 | -4.24E+05 | NULL | AD | Q15054   | POLD3    |
| 1652.1 | Transcriptional regulator ERG       | 4.26E+05 | 0.00E+00 | -4.26E+05 | -4.26E+05 | NULL | AD | B4E3C5   | ERG      |
| 1136.1 | Isoform 3 of Charged multivesic     | 4.27E+05 | 0.00E+00 | -4.27E+05 | -4.27E+05 | NULL | AD | Q9Y3E7-3 | CHMP3    |
| 3210.1 | Exosome complex component R         | 4.29E+05 | 0.00E+00 | -4.29E+05 | -4.29E+05 | NULL | AD | Q96B26   | EXOSC8   |
| 2135.1 | Zinc finger protein 180             | 4.30E+05 | 0.00E+00 | -4.30E+05 | -4.30E+05 | NULL | AD | Q9UJW8   | ZNF180   |
| 1304.1 | Nuclear receptor-interacting pro    | 4.35E+05 | 0.00E+00 | -4.35E+05 | -4.35E+05 | NULL | AD | P48552   | NRIP1    |
| 938.1  | DNA polymerase theta                | 4.39E+05 | 0.00E+00 | -4.39E+05 | -4.39E+05 | NULL | AD | O75417   | POLQ     |
| 1409.1 | Phospholipase D3                    | 4.39E+05 | 0.00E+00 | -4.39E+05 | -4.39E+05 | NULL | AD | Q8IV08   | PLD3     |
| 2177.1 | COMM domain-containing prote        | 4.39E+05 | 0.00E+00 | -4.39E+05 | -4.39E+05 | NULL | AD | Q86X83   | COMMD2   |
| 1580.1 | Transcription elongation factor I   | 4.40E+05 | 0.00E+00 | -4.40E+05 | -4.40E+05 | NULL | AD | Q15370   | TCEB2    |
| 1082.1 | Protein QN1 homolog                 | 4.41E+05 | 0.00E+00 | -4.41E+05 | -4.41E+05 | NULL | AD | Q5TB80   | KIAA1009 |
| 824.2  | Isoform 4 of Lysine-specific dem    | 4.44E+05 | 0.00E+00 | -4.44E+05 | -4.44E+05 | NULL | AD | Q8NHM5-4 | KDM2B    |
| 1273.1 | PWWP domain-containing prote        | 4.46E+05 | 0.00E+00 | -4.46E+05 | -4.46E+05 | NULL | AD | Q5H9M0   | MUM1L1   |
| 2520.1 | Kinesin-like protein KIF14          | 4.53E+05 | 0.00E+00 | -4.53E+05 | -4.53E+05 | NULL | AD | Q15058   | KIF14    |
| 2291.1 | Msx2-interacting protein            | 4.57E+05 | 0.00E+00 | -4.57E+05 | -4.57E+05 | NULL | AD | Q96T58   | SPEN     |
| 2018.1 | ATP-binding cassette sub-family     | 4.58E+05 | 0.00E+00 | -4.58E+05 | -4.58E+05 | NULL | AD | Q9H222   | ABCG5    |
| 363.1  | Tubulin--tyrosine ligase-like pro   | 4.60E+05 | 0.00E+00 | -4.60E+05 | -4.60E+05 | NULL | AD | Q14166   | TTLL12   |
| 2533.1 | Cyclic nucleotide-gated olfactor    | 4.60E+05 | 0.00E+00 | -4.60E+05 | -4.60E+05 | NULL | AD | Q16280   | CNGA2    |
| 1217.1 | Alpha-centractin                    | 4.69E+05 | 0.00E+00 | -4.69E+05 | -4.69E+05 | NULL | AD | P61163   | ACTR1A   |
| 1126.1 | C11orf30 protein                    | 4.73E+05 | 0.00E+00 | -4.73E+05 | -4.73E+05 | NULL | AD | B7ZKU0   | C11orf30 |

|        |                                                 |          |          |           |           |      |    |          |          |
|--------|-------------------------------------------------|----------|----------|-----------|-----------|------|----|----------|----------|
| 1159.1 | Toll-interacting protein                        | 4.74E+05 | 0.00E+00 | -4.74E+05 | -4.74E+05 | NULL | AD | Q9H0E2   | TOLLIP   |
| 3248.1 | Putative lipocalin 1-like protein               | 4.75E+05 | 0.00E+00 | -4.75E+05 | -4.75E+05 | NULL | AD | Q5VSP4   | LCN1P1   |
| 2849.1 | Fibroleukin                                     | 4.78E+05 | 0.00E+00 | -4.78E+05 | -4.78E+05 | NULL | AD | Q14314   | FGL2     |
| 803.1  | Tight junction protein 1 (Zona occludens)       | 4.79E+05 | 0.00E+00 | -4.79E+05 | -4.79E+05 | NULL | AD | G3V1L9   | TJP1     |
| 2226.1 | NXPE family member 2                            | 4.83E+05 | 0.00E+00 | -4.83E+05 | -4.83E+05 | NULL | AD | Q96DL1   | NXPE2    |
| 829.1  | Isoform 3 of Dehydrogenase/reductase            | 4.84E+05 | 0.00E+00 | -4.84E+05 | -4.84E+05 | NULL | AD | A0PJE2-3 | DHRS12   |
| 1040.1 | YEATS domain-containing protein                 | 4.84E+05 | 0.00E+00 | -4.84E+05 | -4.84E+05 | NULL | AD | Q9ULM3   | YEATS2   |
| 1076.1 | Centrin-2                                       | 4.88E+05 | 0.00E+00 | -4.88E+05 | -4.88E+05 | NULL | AD | P41208   | CETN2    |
| 2288.1 | DNA replication factor Cdt1                     | 4.89E+05 | 0.00E+00 | -4.89E+05 | -4.89E+05 | NULL | AD | Q9H211   | CDT1     |
| 3230.1 | Isoform 4 of Transcription factor               | 4.90E+05 | 0.00E+00 | -4.90E+05 | -4.90E+05 | NULL | AD | Q92994-4 | BRF1     |
| 1696.1 | Zinc finger protein 438                         | 4.92E+05 | 0.00E+00 | -4.92E+05 | -4.92E+05 | NULL | AD | Q7Z4V0   | ZNF438   |
| 2785.1 | Fractalkine                                     | 4.96E+05 | 0.00E+00 | -4.96E+05 | -4.96E+05 | NULL | AD | H3BV86   | CX3CL1   |
| 688.1  | Cytoplasmic dynein 2 heavy chain                | 5.01E+05 | 0.00E+00 | -5.01E+05 | -5.01E+05 | NULL | AD | Q8NCM8   | DYNC2H1  |
| 1431.1 | PH and SEC7 domain-containing protein           | 5.01E+05 | 0.00E+00 | -5.01E+05 | -5.01E+05 | NULL | AD | Q9BQI7   | PSD2     |
| 2039.1 | Isoform 2 of Serine/threonine-protein kinase    | 5.08E+05 | 0.00E+00 | -5.08E+05 | -5.08E+05 | NULL | AD | Q5VT25-2 | CDC42BPA |
| 2205.1 | Helicase SKI2W                                  | 5.13E+05 | 0.00E+00 | -5.13E+05 | -5.13E+05 | NULL | AD | Q15477   | SKIV2L   |
| 1489.1 | Collagen triple helix repeat-containing protein | 5.14E+05 | 0.00E+00 | -5.14E+05 | -5.14E+05 | NULL | AD | E7EVQ5   | CTHRC1   |
| 1885.1 | NF-kappa-B-repressing factor                    | 5.14E+05 | 0.00E+00 | -5.14E+05 | -5.14E+05 | NULL | AD | O15226   | NKRF     |
| 920.1  | Synaptotagmin-6                                 | 5.15E+05 | 0.00E+00 | -5.15E+05 | -5.15E+05 | NULL | AD | Q5T7P8   | SYT6     |
| 589.1  | Isoform 3 of Ankyrin repeat domain              | 5.24E+05 | 0.00E+00 | -5.24E+05 | -5.24E+05 | NULL | AD | Q6ZTN6-3 | ANKRD13D |
| 2099.1 | Protein FAM134C                                 | 5.24E+05 | 0.00E+00 | -5.24E+05 | -5.24E+05 | NULL | AD | Q86VR2   | FAM134C  |
| 2366.1 | Coiled-coil domain-containing protein           | 5.25E+05 | 0.00E+00 | -5.25E+05 | -5.25E+05 | NULL | AD | Q502W7   | CCDC38   |
| 2216.1 | Isoform 2 of PDZ domain-containing protein      | 5.28E+05 | 0.00E+00 | -5.28E+05 | -5.28E+05 | NULL | AD | Q5EBL8-2 | PDZD11   |
| 572.1  | Adenine phosphoribosyltransferase               | 5.30E+05 | 0.00E+00 | -5.30E+05 | -5.30E+05 | NULL | AD | P07741   | APRT     |
| 3028.1 | Glycosyltransferase 8 domain-containing protein | 5.31E+05 | 0.00E+00 | -5.31E+05 | -5.31E+05 | NULL | AD | Q9H1C3   | GLT8D2   |
| 2519.1 | E3 ubiquitin-protein ligase RBBP6               | 5.32E+05 | 0.00E+00 | -5.32E+05 | -5.32E+05 | NULL | AD | Q7Z6E9   | RBBP6    |
| 2280.1 | Leucine-rich repeat-containing protein          | 5.38E+05 | 0.00E+00 | -5.38E+05 | -5.38E+05 | NULL | AD | Q8N456   | LRRC18   |
| 1857.1 | RNA-binding protein 47                          | 5.41E+05 | 0.00E+00 | -5.41E+05 | -5.41E+05 | NULL | AD | A0AV96   | RBM47    |
| 3207.1 | A disintegrin and metalloproteinase             | 5.41E+05 | 0.00E+00 | -5.41E+05 | -5.41E+05 | NULL | AD | Q8TE57   | ADAMTS16 |
| 1606.1 | Inositol hexakisphosphate and cation            | 5.45E+05 | 0.00E+00 | -5.45E+05 | -5.45E+05 | NULL | AD | Q6PFW1   | PPIP5K1  |
| 1114.1 | RNA-binding protein 43                          | 5.52E+05 | 0.00E+00 | -5.52E+05 | -5.52E+05 | NULL | AD | Q6ZSC3   | RBM43    |
| 3015.1 | Mesoderm posterior protein 2                    | 5.53E+05 | 0.00E+00 | -5.53E+05 | -5.53E+05 | NULL | AD | Q0VG99   | MESP2    |
| 2100.1 | Thyroid adenoma-associated protein              | 5.56E+05 | 0.00E+00 | -5.56E+05 | -5.56E+05 | NULL | AD | Q6YHU6   | THADA    |
| 1347.1 | Lipase maturation factor 2                      | 5.70E+05 | 0.00E+00 | -5.70E+05 | -5.70E+05 | NULL | AD | Q9BU23   | LMF2     |
| 3005.1 | Dual specificity protein phosphatase            | 5.72E+05 | 0.00E+00 | -5.72E+05 | -5.72E+05 | NULL | AD | Q8WTR2   | DUSP19   |

|        |                                   |          |          |           |           |      |    |          |          |
|--------|-----------------------------------|----------|----------|-----------|-----------|------|----|----------|----------|
| 675.1  | Protocadherin gamma-C5            | 5.76E+05 | 0.00E+00 | -5.76E+05 | -5.76E+05 | NULL | AD | Q9Y5F6   | PCDHGC5  |
| 2916.1 | Isoform 4 of Unconventional my    | 5.76E+05 | 0.00E+00 | -5.76E+05 | -5.76E+05 | NULL | AD | B2RTY4-4 | MYO9A    |
| 932.1  | V-type proton ATPase 16 kDa pr    | 5.77E+05 | 0.00E+00 | -5.77E+05 | -5.77E+05 | NULL | AD | P27449   | ATP6V0C  |
| 3025.1 | Atherin                           | 5.79E+05 | 0.00E+00 | -5.79E+05 | -5.79E+05 | NULL | AD | Q6SPF0   | SAMD1    |
| 1901.1 | Olfactory receptor 51Q1           | 5.89E+05 | 0.00E+00 | -5.89E+05 | -5.89E+05 | NULL | AD | Q8NH59   | OR51Q1   |
| 1241.1 | Isoform 2 of Zinc finger protein  | 5.91E+05 | 0.00E+00 | -5.91E+05 | -5.91E+05 | NULL | AD | Q6NUN9-2 | ZNF746   |
| 624.1  | Tubulin-folding cofactor B        | 5.95E+05 | 0.00E+00 | -5.95E+05 | -5.95E+05 | NULL | AD | Q99426   | TBCB     |
| 3091.1 | UPF0461 protein C5orf24           | 5.96E+05 | 0.00E+00 | -5.96E+05 | -5.96E+05 | NULL | AD | Q7Z6I8   | C5orf24  |
| 1359.1 | Isoform 2 of Protein ELYS         | 6.00E+05 | 0.00E+00 | -6.00E+05 | -6.00E+05 | NULL | AD | Q8WYP5-2 | AHCTF1   |
| 687.1  | Niban-like protein 1              | 6.10E+05 | 0.00E+00 | -6.10E+05 | -6.10E+05 | NULL | AD | Q96TA1   | FAM129B  |
| 875.1  | Cation-independent mannose-6      | 6.10E+05 | 0.00E+00 | -6.10E+05 | -6.10E+05 | NULL | AD | P11717   | IGF2R    |
| 3204.1 | Charged multivesicular body prc   | 6.19E+05 | 0.00E+00 | -6.19E+05 | -6.19E+05 | NULL | AD | Q9HD42   | CHMP1A   |
| 858.1  | Protein KTI12 homolog             | 6.44E+05 | 0.00E+00 | -6.44E+05 | -6.44E+05 | NULL | AD | Q96EK9   | WDR52    |
| 1332.1 | Isoform 2 of WD repeat-contain    | 6.49E+05 | 0.00E+00 | -6.49E+05 | -6.49E+05 | NULL | AD | Q96MT7-2 | WDR52    |
| 2630.1 | Hephaestin-like protein 1         | 6.50E+05 | 0.00E+00 | -6.50E+05 | -6.50E+05 | NULL | AD | Q6MZM0   | HEPHL1   |
| 1361.1 | Negative elongation factor C/D    | 6.54E+05 | 0.00E+00 | -6.54E+05 | -6.54E+05 | NULL | AD | Q8IXH7   | NELFCD   |
| 904.1  | E3 ubiquitin-protein ligase CHIP  | 6.56E+05 | 0.00E+00 | -6.56E+05 | -6.56E+05 | NULL | AD | Q9UNE7   | STUB1    |
| 546.1  | Thioredoxin reductase 1, cytopl   | 6.59E+05 | 0.00E+00 | -6.59E+05 | -6.59E+05 | NULL | AD | Q16881   | TXNRD1   |
| 1325.1 | Inactive pancreatic lipase-relate | 6.60E+05 | 0.00E+00 | -6.60E+05 | -6.60E+05 | NULL | AD | P54315   | PNLIPRP1 |
| 3259.1 | Cartilage intermediate layer pro  | 6.69E+05 | 0.00E+00 | -6.69E+05 | -6.69E+05 | NULL | AD | K7EPJ4   | CILP2    |
| 2465.1 | SAM domain-containing protein     | 6.70E+05 | 0.00E+00 | -6.70E+05 | -6.70E+05 | NULL | AD | F8WAA1   | SAMSN1   |
| 1070.1 | Coiled-coil domain-containing p   | 6.75E+05 | 0.00E+00 | -6.75E+05 | -6.75E+05 | NULL | AD | Q8NCX0   | CCDC150  |
| 1168.1 | Deoxycytidine kinase              | 6.82E+05 | 0.00E+00 | -6.82E+05 | -6.82E+05 | NULL | AD | D6RFG8   | DCK      |
| 2681.1 | Polycystic kidney disease 2-like  | 6.96E+05 | 0.00E+00 | -6.96E+05 | -6.96E+05 | NULL | AD | Q9NZM6   | PKD2L2   |
| 1662.1 | E3 ubiquitin-protein ligase NEDI  | 6.99E+05 | 0.00E+00 | -6.99E+05 | -6.99E+05 | NULL | AD | Q96PU5   | NEDD4L   |
| 1004.1 | Glutathione S-transferase Mu 3    | 7.01E+05 | 0.00E+00 | -7.01E+05 | -7.01E+05 | NULL | AD | P21266   | GSTM3    |
| 474.1  | UDP-glucose 6-dehydrogenase       | 7.14E+05 | 0.00E+00 | -7.14E+05 | -7.14E+05 | NULL | AD | O60701   | UGDH     |
| 438.1  | Serine/threonine-protein kinase   | 7.19E+05 | 0.00E+00 | -7.19E+05 | -7.19E+05 | NULL | AD | Q9UHD2   | TBK1     |
| 1511.1 | Poly(ADP-ribose) glycohydrolase   | 7.21E+05 | 0.00E+00 | -7.21E+05 | -7.21E+05 | NULL | AD | Q9NX46   | ADPRHL2  |
| 537.1  | Ataxin-10                         | 7.24E+05 | 0.00E+00 | -7.24E+05 | -7.24E+05 | NULL | AD | Q9UBB4   | ATXN10   |
| 3186.1 | DNA-directed RNA polymerase I     | 7.40E+05 | 0.00E+00 | -7.40E+05 | -7.40E+05 | NULL | AD | O95602   | POLR1A   |
| 883.1  | Isoform 2 of Extended synaptot    | 7.42E+05 | 0.00E+00 | -7.42E+05 | -7.42E+05 | NULL | AD | Q9BSJ8-2 | ESYT1    |
| 2479.1 | Major facilitator superfamily do  | 7.65E+05 | 0.00E+00 | -7.65E+05 | -7.65E+05 | NULL | AD | Q8NBP5   | MFSD9    |
| 1842.1 | Kinesin-like protein KLP6         | 7.74E+05 | 0.00E+00 | -7.74E+05 | -7.74E+05 | NULL | AD | B7ZC32   | KLP6     |
| 2629.1 | Zinc finger protein 660           | 7.92E+05 | 0.00E+00 | -7.92E+05 | -7.92E+05 | NULL | AD | Q6AZW8   | ZNF660   |

|        |                                  |          |          |           |           |      |    |          |           |
|--------|----------------------------------|----------|----------|-----------|-----------|------|----|----------|-----------|
| 3044.1 | Neogenin                         | 8.02E+05 | 0.00E+00 | -8.02E+05 | -8.02E+05 | NULL | AD | Q92859   | NEO1      |
| 2456.1 | Prefoldin subunit 5              | 8.04E+05 | 0.00E+00 | -8.04E+05 | -8.04E+05 | NULL | AD | Q99471   | PFDN5     |
| 1169.1 | Acetoacetyl-CoA synthetase       | 8.07E+05 | 0.00E+00 | -8.07E+05 | -8.07E+05 | NULL | AD | Q86V21   | AACS      |
| 3019.1 | Olfactory receptor 10A4          | 8.13E+05 | 0.00E+00 | -8.13E+05 | -8.13E+05 | NULL | AD | Q9H209   | OR10A4    |
| 2489.1 | Pleckstrin homology domain-coi   | 8.15E+05 | 0.00E+00 | -8.15E+05 | -8.15E+05 | NULL | AD | E9PKC0   | PLEKHA7   |
| 1660.1 | Lysosomal acid phosphatase       | 8.17E+05 | 0.00E+00 | -8.17E+05 | -8.17E+05 | NULL | AD | P11117   | ACP2      |
| 514.1  | Unconventional myosin-XVIIIa     | 8.32E+05 | 0.00E+00 | -8.32E+05 | -8.32E+05 | NULL | AD | J3KNX9   | MYO18A    |
| 2937.1 | Isoform Flip of Glutamate recep  | 8.90E+05 | 0.00E+00 | -8.90E+05 | -8.90E+05 | NULL | AD | P42263-2 | GRIA3     |
| 1922.1 | Olfactory receptor 51B6          | 9.09E+05 | 0.00E+00 | -9.09E+05 | -9.09E+05 | NULL | AD | Q9H340   | OR51B6    |
| 20.4   | Putative heat shock protein HSP  | 9.10E+05 | 0.00E+00 | -9.10E+05 | -9.10E+05 | NULL | AD | Q58FG1   | HSP90AA4P |
| 1522.1 | Isoform 4 of Dynein heavy chain  | 9.17E+05 | 0.00E+00 | -9.17E+05 | -9.17E+05 | NULL | AD | Q0VDD8-4 | DNAH14    |
| 2690.1 | Frizzled-8                       | 9.33E+05 | 0.00E+00 | -9.33E+05 | -9.33E+05 | NULL | AD | Q9H461   | FZD8      |
| 427.1  | EF-hand domain-containing proi   | 9.64E+05 | 0.00E+00 | -9.64E+05 | -9.64E+05 | NULL | AD | Q96C19   | EFHD2     |
| 1420.1 | Probable tRNA(His) guanylyltrar  | 9.64E+05 | 0.00E+00 | -9.64E+05 | -9.64E+05 | NULL | AD | Q9NWX6   | THG1L     |
| 706.1  | Glutathione synthetase           | 9.70E+05 | 0.00E+00 | -9.70E+05 | -9.70E+05 | NULL | AD | P48637   | GSS       |
| 1549.1 | Chromodomain-helicase-DNA-b      | 9.76E+05 | 0.00E+00 | -9.76E+05 | -9.76E+05 | NULL | AD | O14647   | CHD2      |
| 3057.1 | Caspase recruitment domain-co    | 9.81E+05 | 0.00E+00 | -9.81E+05 | -9.81E+05 | NULL | AD | Q9BXL6   | CARD14    |
| 318.3  | Fidgetin-like protein 1          | 1.00E+06 | 0.00E+00 | -1.00E+06 | -1.00E+06 | NULL | AD | Q6PIW4   | FIGNL1    |
| 1994.1 | Coiled-coil domain-containing p  | 1.01E+06 | 0.00E+00 | -1.01E+06 | -1.01E+06 | NULL | AD | Q5T0U0   | CCDC122   |
| 2766.1 | Nexilin                          | 1.01E+06 | 0.00E+00 | -1.01E+06 | -1.01E+06 | NULL | AD | Q0ZGT2   | NEXN      |
| 710.1  | Tropomodulin-3                   | 1.02E+06 | 0.00E+00 | -1.02E+06 | -1.02E+06 | NULL | AD | Q9NYL9   | TMOD3     |
| 1831.1 | Piwi-like protein 1              | 1.03E+06 | 0.00E+00 | -1.03E+06 | -1.03E+06 | NULL | AD | Q96J94   | PIWIL1    |
| 3150.1 | 1-phosphatidylinositol 4,5-bisph | 1.03E+06 | 0.00E+00 | -1.03E+06 | -1.03E+06 | NULL | AD | Q4KWH8   | PLCH1     |
| 488.1  | Titin                            | 1.03E+06 | 0.00E+00 | -1.03E+06 | -1.03E+06 | NULL | AD | Q8WZ42   | TTN       |
| 2534.1 | Mitogen-activated protein kinas  | 1.05E+06 | 0.00E+00 | -1.05E+06 | -1.05E+06 | NULL | AD | P53778   | MAPK12    |
| 2701.1 | Histone acetyltransferase KAT6E  | 1.06E+06 | 0.00E+00 | -1.06E+06 | -1.06E+06 | NULL | AD | Q8WYB5   | KAT6B     |
| 630.1  | Annexin A11                      | 1.07E+06 | 0.00E+00 | -1.07E+06 | -1.07E+06 | NULL | AD | P50995   | ANXA11    |
| 1072.1 | Kit ligand                       | 1.07E+06 | 0.00E+00 | -1.07E+06 | -1.07E+06 | NULL | AD | P21583   | KITLG     |
| 1055.1 | NEU3 protein                     | 1.09E+06 | 0.00E+00 | -1.09E+06 | -1.09E+06 | NULL | AD | A8K327   | NEU3      |
| 1062.1 | Sister chromatid cohesion prote  | 1.09E+06 | 0.00E+00 | -1.09E+06 | -1.09E+06 | NULL | AD | Q29RF7   | PDS5A     |
| 1309.1 | A disintegrin and metalloproteir | 1.09E+06 | 0.00E+00 | -1.09E+06 | -1.09E+06 | NULL | AD | Q8TE56   | ADAMTS17  |
| 753.1  | Isoform 6 of Calpastatin         | 1.12E+06 | 0.00E+00 | -1.12E+06 | -1.12E+06 | NULL | AD | P20810-6 | CAST      |
| 1125.1 | ADP-ribosylation factor 3        | 1.13E+06 | 0.00E+00 | -1.13E+06 | -1.13E+06 | NULL | AD | F5H423   | ARF3      |
| 2862.1 | Thiamine-triphosphatase          | 1.14E+06 | 0.00E+00 | -1.14E+06 | -1.14E+06 | NULL | AD | Q9BU02   | THTPA     |
| 1098.1 | 6-pyruvyl tetrahydrobiopterin    | 1.15E+06 | 0.00E+00 | -1.15E+06 | -1.15E+06 | NULL | AD | Q03393   | PTS       |

|        |                                    |          |          |           |           |      |    |          |        |
|--------|------------------------------------|----------|----------|-----------|-----------|------|----|----------|--------|
| 1012.1 | Isoform 3 of BEN domain-contai     | 1.27E+06 | 0.00E+00 | -1.27E+06 | -1.27E+06 | NULL | AD | Q6ZU67-3 | BEND4  |
| 585.1  | IST1 homolog                       | 1.31E+06 | 0.00E+00 | -1.31E+06 | -1.31E+06 | NULL | AD | P53990   | IST1   |
| 950.1  | Nuclear transcription factor Y su  | 1.33E+06 | 0.00E+00 | -1.33E+06 | -1.33E+06 | NULL | AD | Q13952   | NFYC   |
| 1537.1 | Receptor expression-enhancing      | 1.33E+06 | 0.00E+00 | -1.33E+06 | -1.33E+06 | NULL | AD | Q6NUK4   | REEP3  |
| 517.1  | m7GpppX diphosphatase              | 1.34E+06 | 0.00E+00 | -1.34E+06 | -1.34E+06 | NULL | AD | Q96C86   | DCPS   |
| 580.1  | UV excision repair protein RAD2    | 1.35E+06 | 0.00E+00 | -1.35E+06 | -1.35E+06 | NULL | AD | P54727   | RAD23B |
| 2920.1 | Coiled-coil domain-containing p    | 1.37E+06 | 0.00E+00 | -1.37E+06 | -1.37E+06 | NULL | AD | Q8IWA6   | CCDC60 |
| 14.3   | Myosin-14                          | 1.39E+06 | 0.00E+00 | -1.39E+06 | -1.39E+06 | NULL | AD | G8JLL9   | MYH14  |
| 565.1  | Protein FAM83H                     | 1.39E+06 | 0.00E+00 | -1.39E+06 | -1.39E+06 | NULL | AD | Q6ZRV2   | FAM83H |
| 1841.1 | SURP and G-patch domain-conta      | 1.44E+06 | 0.00E+00 | -1.44E+06 | -1.44E+06 | NULL | AD | Q8IWZ8   | SUGP1  |
| 975.1  | DNA mismatch repair protein M      | 1.46E+06 | 0.00E+00 | -1.46E+06 | -1.46E+06 | NULL | AD | P43246   | MSH2   |
| 770.1  | Reticulocalbin-1                   | 1.52E+06 | 0.00E+00 | -1.52E+06 | -1.52E+06 | NULL | AD | Q15293   | RCN1   |
| 1081.1 | Coronin                            | 1.52E+06 | 0.00E+00 | -1.52E+06 | -1.52E+06 | NULL | AD | P57737   | CORO7  |
| 530.1  | Annexin A7                         | 1.53E+06 | 0.00E+00 | -1.53E+06 | -1.53E+06 | NULL | AD | P20073   | ANXA7  |
| 1970.1 | Aldo-keto reductase family 1 me    | 1.55E+06 | 0.00E+00 | -1.55E+06 | -1.55E+06 | NULL | AD | P17516   | AKR1C4 |
| 731.1  | Reticulocalbin-2                   | 1.62E+06 | 0.00E+00 | -1.62E+06 | -1.62E+06 | NULL | AD | F8WCY5   | RCN2   |
| 558.1  | Charged multivesicular body pro    | 1.70E+06 | 0.00E+00 | -1.70E+06 | -1.70E+06 | NULL | AD | Q9UQN3   | CHMP2B |
| 931.1  | V-set domain containing T cell a   | 1.75E+06 | 0.00E+00 | -1.75E+06 | -1.75E+06 | NULL | AD | Q5T2L0   | VTCN1  |
| 818.1  | Diablo homolog, mitochondrial      | 1.76E+06 | 0.00E+00 | -1.76E+06 | -1.76E+06 | NULL | AD | Q9NR28   | DIABLO |
| 1908.1 | Zinc finger protein 350            | 1.89E+06 | 0.00E+00 | -1.89E+06 | -1.89E+06 | NULL | AD | Q9GZX5   | ZNF350 |
| 1064.1 | Spondin-2                          | 1.97E+06 | 0.00E+00 | -1.97E+06 | -1.97E+06 | NULL | AD | Q9BUD6   | SPON2  |
| 12.2   | Isoform 3 of Alpha-actinin-1       | 2.23E+06 | 0.00E+00 | -2.23E+06 | -2.23E+06 | NULL | AD | P12814-3 | ACTN1  |
| 1801.1 | Phospholipid scramblase 2          | 2.49E+06 | 0.00E+00 | -2.49E+06 | -2.49E+06 | NULL | AD | Q9NRY7   | PLSCR2 |
| 272.1  | ATPase WRNIP1                      | 2.68E+06 | 0.00E+00 | -2.68E+06 | -2.68E+06 | NULL | AD | Q96S55   | WRNIP1 |
| 1340.1 | Protein DEK                        | 2.69E+06 | 0.00E+00 | -2.69E+06 | -2.69E+06 | NULL | AD | P35659   | DEK    |
| 2020.1 | Isoform 2 of Beta-parvin           | 2.76E+06 | 0.00E+00 | -2.76E+06 | -2.76E+06 | NULL | AD | Q9HBI1-2 | PARVB  |
| 680.1  | Myoglobin                          | 2.87E+06 | 0.00E+00 | -2.87E+06 | -2.87E+06 | NULL | AD | P02144   | MB     |
| 1087.1 | Probable ATP-dependent RNA h       | 2.87E+06 | 0.00E+00 | -2.87E+06 | -2.87E+06 | NULL | AD | F5GZS0   | DHX36  |
| 336.1  | Serine/threonine-protein kinase    | 2.90E+06 | 0.00E+00 | -2.90E+06 | -2.90E+06 | NULL | AD | F8WBA3   | PRKD1  |
| 1.3    | Epiplakin                          | 3.00E+06 | 0.00E+00 | -3.00E+06 | -3.00E+06 | NULL | AD | E9PPU0   | EPPK1  |
| 318.1  | Vacuolar protein sorting-associa   | 3.03E+06 | 0.00E+00 | -3.03E+06 | -3.03E+06 | NULL | AD | O75351   | VPS4B  |
| 642.1  | Sequestosome-1                     | 3.07E+06 | 0.00E+00 | -3.07E+06 | -3.07E+06 | NULL | AD | Q13501   | SQSTM1 |
| 2420.1 | Cell division cycle 7-related prot | 3.43E+06 | 0.00E+00 | -3.43E+06 | -3.43E+06 | NULL | AD | O00311   | CDC7   |
| 2072.1 | Tubulin epsilon chain              | 3.44E+06 | 0.00E+00 | -3.44E+06 | -3.44E+06 | NULL | AD | Q9UJT0   | TUBE1  |
| 416.1  | Calpain small subunit 1            | 3.86E+06 | 0.00E+00 | -3.86E+06 | -3.86E+06 | NULL | AD | K7ELJ7   | CAPNS1 |

|        |                                   |          |          |           |           |       |      |          |         |
|--------|-----------------------------------|----------|----------|-----------|-----------|-------|------|----------|---------|
| 284.1  | Vacuolar protein sorting-associa  | 4.42E+06 | 0.00E+00 | -4.42E+06 | -4.42E+06 | NULL  | AD   | Q9NP79   | VTA1    |
| 466.1  | Programmed cell death protein     | 4.51E+06 | 0.00E+00 | -4.51E+06 | -4.51E+06 | NULL  | AD   | O75340   | PDCD6   |
| 321.1  | Inorganic pyrophosphatase         | 4.65E+06 | 0.00E+00 | -4.65E+06 | -4.65E+06 | NULL  | AD   | Q15181   | PPA1    |
| 382.1  | Tubulin-specific chaperone A      | 5.27E+06 | 0.00E+00 | -5.27E+06 | -5.27E+06 | NULL  | AD   | E5RJD8   | TBCA    |
| 126.1  | Cytospin-A                        | 6.73E+06 | 0.00E+00 | -6.73E+06 | -6.73E+06 | NULL  | AD   | Q69YQ0   | SPECC1L |
| 163.1  | Copine-3                          | 7.68E+06 | 0.00E+00 | -7.68E+06 | -7.68E+06 | NULL  | AD   | O75131   | CPNE3   |
| 98.1   | Drebrin                           | 1.33E+07 | 0.00E+00 | -1.33E+07 | -1.33E+07 | NULL  | AD   | A8MV58   | DBN1    |
| 63.1   | X-ray repair cross-complementir   | 1.37E+07 | 0.00E+00 | -1.37E+07 | -1.37E+07 | NULL  | AD   | P13010   | XRCC5   |
| 14.2   | Myosin-10                         | 1.37E+07 | 0.00E+00 | -1.37E+07 | -1.37E+07 | NULL  | AD   | P35580   | MYH10   |
| 61.1   | X-ray repair cross-complementir   | 1.48E+07 | 0.00E+00 | -1.48E+07 | -1.48E+07 | NULL  | AD   | P12956   | XRCC6   |
| 7.1    | Isoform 8 of Filamin-B            | 2.67E+07 | 0.00E+00 | -2.67E+07 | -2.67E+07 | NULL  | AD   | O75369-8 | FLNB    |
| 21.2   | Tropomyosin alpha-1 chain         | 3.14E+07 | 0.00E+00 | -3.14E+07 | -3.14E+07 | NULL  | AD   | B7Z596   | TPM1    |
| 17.1   | Probable ATP-dependent RNA h      | 1.23E+04 | 6.68E+07 | 5.42E+03  | 5.42E+03  | 10.00 | 8.60 | H3BLZ8   | DDX17   |
| 17.2   | ATP-dependent RNA helicase DI     | 4.21E+04 | 5.59E+07 | 1.33E+03  | 1.33E+03  | 10.00 | 7.19 | O00571   | DDX3X   |
| 15.1   | Non-POU domain-containing oc      | 4.68E+05 | 2.68E+08 | 5.73E+02  | 5.73E+02  | 10.00 | 6.35 | Q15233   | NONO    |
| 237.1  | Catenin delta-1                   | 1.56E+04 | 7.69E+06 | 4.94E+02  | 4.94E+02  | 10.00 | 6.20 | O60716   | CTNND1  |
| 1047.1 | Protein furry homolog             | 2.96E+03 | 1.38E+06 | 4.66E+02  | 4.66E+02  | 10.00 | 6.14 | Q5TBA9   | FRY     |
| 113.1  | 40S ribosomal protein S3          | 3.27E+04 | 1.47E+07 | 4.50E+02  | 4.50E+02  | 10.00 | 6.11 | P23396   | RPS3    |
| 131.1  | 60S ribosomal protein L30         | 2.80E+04 | 1.17E+07 | 4.18E+02  | 4.18E+02  | 10.00 | 6.03 | P62888   | RPL30   |
| 184.1  | Pyruvate carboxylase, mitochon    | 3.07E+04 | 7.65E+06 | 2.49E+02  | 2.49E+02  | 10.00 | 5.52 | P11498   | PC      |
| 451.1  | Protein BUD31 homolog             | 1.32E+04 | 2.68E+06 | 2.02E+02  | 2.02E+02  | 10.00 | 5.31 | P41223   | BUD31   |
| 106.1  | Delta(3,5)-Delta(2,4)-dienoyl-Co  | 3.89E+04 | 7.69E+06 | 1.98E+02  | 1.98E+02  | 10.00 | 5.29 | Q13011   | ECH1    |
| 946.1  | Protein AHNAK2                    | 4.77E+03 | 9.24E+05 | 1.94E+02  | 1.94E+02  | 10.00 | 5.27 | Q8IVF2   | AHNAK2  |
| 11.1   | Heterogeneous nuclear ribonuc     | 7.09E+05 | 1.37E+08 | 1.93E+02  | 1.93E+02  | 10.00 | 5.26 | P52272   | HNRNPM  |
| 188.1  | 60S ribosomal protein L10a        | 3.86E+04 | 7.14E+06 | 1.85E+02  | 1.85E+02  | 10.00 | 5.22 | P62906   | RPL10A  |
| 778.1  | Isoform 2 of Prostatic acid phosj | 1.85E+03 | 3.15E+05 | 1.70E+02  | 1.70E+02  | 10.00 | 5.14 | P15309-2 | ACPP    |
| 17.3   | Probable ATP-dependent RNA h      | 1.41E+05 | 2.33E+07 | 1.66E+02  | 1.66E+02  | 10.00 | 5.11 | P17844   | DDX5    |
| 649.1  | Polypeptide N-acetylgalactosam    | 5.52E+03 | 6.85E+05 | 1.24E+02  | 1.24E+02  | 10.00 | 4.82 | Q7Z7M9   | GALNT5  |
| 245.1  | Mitochondrial import inner mer    | 1.98E+05 | 2.33E+07 | 1.18E+02  | 1.18E+02  | 10.00 | 4.77 | Q9Y5L4   | TIMM13  |
| 252.1  | Methylcrotonoyl-CoA carboxyla     | 1.12E+04 | 1.22E+06 | 1.09E+02  | 1.09E+02  | 10.00 | 4.69 | Q96RQ3   | MCCC1   |
| 513.1  | Small nuclear ribonucleoprotein   | 2.65E+04 | 2.80E+06 | 1.06E+02  | 1.06E+02  | 10.00 | 4.66 | P62314   | SNRPD1  |
| 260.1  | Splicing factor 3A subunit 1      | 3.72E+04 | 3.88E+06 | 1.04E+02  | 1.04E+02  | 10.00 | 4.65 | Q15459   | SF3A1   |
| 90.1   | Keratin, type I cytoskeletal 9    | 1.22E+05 | 1.19E+07 | 9.73E+01  | 9.73E+01  | 10.00 | 4.58 | P35527   | KRT9    |
| 450.1  | Isoform 5 of Nuclear pore comp    | 5.90E+03 | 5.70E+05 | 9.65E+01  | 9.65E+01  | 10.00 | 4.57 | P35658-5 | NUP214  |
| 191.1  | Putative RNA-binding protein 3    | 1.83E+05 | 1.73E+07 | 9.45E+01  | 9.45E+01  | 10.00 | 4.55 | P98179   | RBM3    |

|        |                                                |          |          |          |          |       |      |        |           |
|--------|------------------------------------------------|----------|----------|----------|----------|-------|------|--------|-----------|
| 1391.1 | Remodeling and spacing factor                  | 6.47E+03 | 5.74E+05 | 8.87E+01 | 8.87E+01 | 10.00 | 4.49 | Q96T23 | RSF1      |
| 129.1  | Elongation factor Tu, mitochondria             | 1.02E+05 | 8.90E+06 | 8.72E+01 | 8.72E+01 | 10.00 | 4.47 | P49411 | TUFM      |
| 1261.1 | Protein disulfide-isomerase-like               | 1.02E+04 | 8.64E+05 | 8.46E+01 | 8.46E+01 | 10.00 | 4.44 | Q8N807 | PDILT     |
| 83.1   | Heterogeneous nuclear ribonucleoprotein        | 3.04E+05 | 2.44E+07 | 8.02E+01 | 8.02E+01 | 10.00 | 4.38 | P22626 | HNRNPA2B1 |
| 409.1  | Eukaryotic translation initiation factor 4E    | 2.51E+04 | 1.80E+06 | 7.18E+01 | 7.18E+01 | 10.00 | 4.27 | B5ME19 | EIF3CL    |
| 66.2   | RNA-binding protein FUS                        | 3.99E+05 | 2.50E+07 | 6.26E+01 | 6.26E+01 | 10.00 | 4.14 | H3BPE7 | FUS       |
| 371.1  | Peptidyl-prolyl cis-trans isomerase            | 4.99E+04 | 2.85E+06 | 5.71E+01 | 5.71E+01 | 10.00 | 4.04 | Q00688 | FKBP3     |
| 175.1  | 60S ribosomal protein L38                      | 3.42E+05 | 1.93E+07 | 5.65E+01 | 5.65E+01 | 10.00 | 4.03 | P63173 | RPL38     |
| 77.1   | Malate dehydrogenase, mitochondrial            | 3.92E+05 | 2.14E+07 | 5.46E+01 | 5.46E+01 | 10.00 | 4.00 | P40926 | MDH2      |
| 174.1  | Cathepsin D                                    | 1.92E+05 | 1.04E+07 | 5.41E+01 | 5.41E+01 | 10.00 | 3.99 | P07339 | CTSD      |
| 1563.1 | 40S ribosomal protein S24                      | 3.77E+04 | 1.94E+06 | 5.14E+01 | 5.14E+01 | 10.00 | 3.94 | P62847 | RPS24     |
| 570.1  | Palmitoyl-protein thioesterase 1               | 4.24E+04 | 2.07E+06 | 4.89E+01 | 4.89E+01 | 10.00 | 3.89 | P50897 | PPT1      |
| 779.1  | Proteasome subunit beta type-4                 | 1.19E+04 | 5.70E+05 | 4.78E+01 | 4.78E+01 | 10.00 | 3.87 | P28070 | PSMB4     |
| 1457.1 | Myosin-6                                       | 4.65E+04 | 2.18E+06 | 4.69E+01 | 4.69E+01 | 10.00 | 3.85 | P13533 | MYH6      |
| 1085.1 | E3 ubiquitin-protein ligase Topoisomerase      | 6.50E+03 | 3.02E+05 | 4.65E+01 | 4.65E+01 | 10.00 | 3.84 | Q9NS56 | TOPORS    |
| 838.1  | Pre-mRNA-processing factor 19                  | 9.21E+03 | 4.21E+05 | 4.57E+01 | 4.57E+01 | 10.00 | 3.82 | Q9UMS4 | PRPF19    |
| 576.1  | Translation machinery-associated protein 1     | 6.22E+04 | 2.58E+06 | 4.15E+01 | 4.15E+01 | 10.00 | 3.73 | Q9Y2S6 | TMA7      |
| 96.2   | Far upstream element-binding protein 1         | 1.10E+05 | 4.56E+06 | 4.14E+01 | 4.14E+01 | 10.00 | 3.72 | B4DT31 | FUBP1     |
| 267.1  | 40S ribosomal protein S2                       | 2.48E+05 | 1.02E+07 | 4.12E+01 | 4.12E+01 | 10.00 | 3.72 | P15880 | RPS2      |
| 442.1  | 60S acidic ribosomal protein P2                | 1.07E+05 | 4.41E+06 | 4.12E+01 | 4.12E+01 | 10.00 | 3.72 | P05387 | RPLP2     |
| 939.1  | Probable E3 ubiquitin-protein ligase           | 5.13E+03 | 2.00E+05 | 3.90E+01 | 3.90E+01 | 10.00 | 3.66 | F8VWT9 | HECTD4    |
| 112.1  | ATP synthase subunit alpha, mitochondrial      | 3.35E+05 | 1.30E+07 | 3.88E+01 | 3.88E+01 | 10.00 | 3.66 | P25705 | ATP5A1    |
| 164.1  | 60S ribosomal protein L28                      | 5.39E+05 | 2.03E+07 | 3.77E+01 | 3.77E+01 | 10.00 | 3.63 | P46779 | RPL28     |
| 582.1  | 26S proteasome non-ATPase regulatory subunit 2 | 2.98E+04 | 1.09E+06 | 3.65E+01 | 3.65E+01 | 10.00 | 3.60 | O00487 | PSMD14    |
| 2.1    | Desmoplakin                                    | 1.66E+06 | 5.85E+07 | 3.53E+01 | 3.53E+01 | 10.00 | 3.56 | P15924 | DSP       |
| 274.1  | V-type proton ATPase catalytic subunit         | 3.63E+05 | 1.27E+07 | 3.50E+01 | 3.50E+01 | 10.00 | 3.56 | P38606 | ATP6V1A   |
| 47.1   | Protein transport protein Sec23                | 6.01E+05 | 2.08E+07 | 3.46E+01 | 3.46E+01 | 10.00 | 3.54 | Q15437 | SEC23B    |
| 1027.1 | Fer-1-like protein 4                           | 5.87E+03 | 2.03E+05 | 3.46E+01 | 3.46E+01 | 10.00 | 3.54 | A9Z1Z3 | FER1L4    |
| 223.1  | 40S ribosomal protein S28                      | 3.64E+05 | 1.20E+07 | 3.30E+01 | 3.30E+01 | 10.00 | 3.50 | P62857 | RPS28     |
| 1166.1 | Nuclear valosin-containing protein             | 1.13E+05 | 3.72E+06 | 3.29E+01 | 3.29E+01 | 10.00 | 3.49 | O15381 | NVL       |
| 97.1   | Nucleophosmin                                  | 9.64E+05 | 3.16E+07 | 3.28E+01 | 3.28E+01 | 10.00 | 3.49 | P06748 | NPM1      |
| 210.1  | Stress-70 protein, mitochondrial               | 1.97E+05 | 6.44E+06 | 3.27E+01 | 3.27E+01 | 10.00 | 3.49 | P38646 | HSPA9     |
| 611.1  | Cytochrome c oxidase subunit 6                 | 1.98E+04 | 6.47E+05 | 3.27E+01 | 3.27E+01 | 10.00 | 3.49 | P14854 | COX6B1    |
| 264.1  | Chromobox protein homolog 3                    | 2.55E+05 | 8.29E+06 | 3.25E+01 | 3.25E+01 | 10.00 | 3.48 | Q13185 | CBX3      |
| 417.1  | Proteasome subunit alpha type-3                | 8.47E+03 | 2.73E+05 | 3.22E+01 | 3.22E+01 | 10.00 | 3.47 | P25788 | PSMA3     |

|        |                                    |          |          |          |          |       |      |          |          |
|--------|------------------------------------|----------|----------|----------|----------|-------|------|----------|----------|
| 586.1  | Eukaryotic translation initiation  | 1.94E+04 | 6.23E+05 | 3.21E+01 | 3.21E+01 | 10.00 | 3.47 | Q14152   | EIF3A    |
| 211.1  | 40S ribosomal protein S12          | 1.10E+05 | 3.53E+06 | 3.20E+01 | 3.20E+01 | 10.00 | 3.47 | P25398   | RPS12    |
| 117.1  | 60S ribosomal protein L13          | 1.00E+06 | 3.16E+07 | 3.14E+01 | 3.14E+01 | 10.00 | 3.45 | P26373   | RPL13    |
| 225.1  | 40S ribosomal protein S6           | 8.37E+05 | 2.57E+07 | 3.07E+01 | 3.07E+01 | 10.00 | 3.42 | P62753   | RPS6     |
| 228.1  | Beta-hexosaminidase subunit beta   | 1.44E+05 | 4.38E+06 | 3.05E+01 | 3.05E+01 | 10.00 | 3.42 | P07686   | HEXB     |
| 108.1  | Microtubule-associated protein     | 2.15E+05 | 6.42E+06 | 2.98E+01 | 2.98E+01 | 10.00 | 3.39 | P46821   | MAP1B    |
| 317.1  | Pre-mRNA-processing factor 6       | 7.69E+04 | 2.25E+06 | 2.92E+01 | 2.92E+01 | 10.00 | 3.38 | O94906   | PRPF6    |
| 166.1  | Heterogeneous nuclear ribonuc      | 3.17E+05 | 9.20E+06 | 2.90E+01 | 2.90E+01 | 10.00 | 3.37 | Q14103   | HNRNPD   |
| 100.1  | tRNA-splicing ligase RtcB homol    | 4.29E+05 | 1.23E+07 | 2.87E+01 | 2.87E+01 | 10.00 | 3.36 | Q9Y3I0   | C22orf28 |
| 115.1  | Isoform 2 of Regulator of chrom    | 8.59E+05 | 2.38E+07 | 2.77E+01 | 2.77E+01 | 10.00 | 3.32 | P18754-2 | RCC1     |
| 235.1  | Puromycin-sensitive aminopept      | 9.18E+04 | 2.52E+06 | 2.75E+01 | 2.75E+01 | 10.00 | 3.31 | P55786   | NPEPPS   |
| 722.1  | V-type proton ATPase subunit G     | 6.98E+04 | 1.85E+06 | 2.65E+01 | 2.65E+01 | 10.00 | 3.28 | O75348   | ATP6V1G1 |
| 283.1  | Probable ATP-dependent RNA h       | 1.19E+05 | 3.14E+06 | 2.63E+01 | 2.63E+01 | 10.00 | 3.27 | P26196   | DDX6     |
| 47.2   | Protein transport protein Sec23    | 7.20E+05 | 1.82E+07 | 2.53E+01 | 2.53E+01 | 10.00 | 3.23 | Q15436   | SEC23A   |
| 428.1  | DNA replication licensing factor   | 5.20E+04 | 1.30E+06 | 2.50E+01 | 2.50E+01 | 10.00 | 3.22 | P25205   | MCM3     |
| 370.1  | Splicing factor 3A subunit 3       | 1.26E+05 | 3.16E+06 | 2.50E+01 | 2.50E+01 | 10.00 | 3.22 | Q12874   | SF3A3    |
| 556.1  | Eukaryotic translation initiation  | 6.22E+04 | 1.55E+06 | 2.49E+01 | 2.49E+01 | 10.00 | 3.22 | P47813   | EIF1AX   |
| 797.1  | NEDD8-activating enzyme E1 re      | 1.08E+04 | 2.67E+05 | 2.47E+01 | 2.47E+01 | 10.00 | 3.21 | A6NCK0   | NAE1     |
| 2095.1 | 11-cis retinol dehydrogenase       | 1.01E+04 | 2.48E+05 | 2.47E+01 | 2.47E+01 | 10.00 | 3.20 | Q92781   | RDH5     |
| 347.1  | Cysteine and glycine-rich protei   | 1.78E+04 | 4.38E+05 | 2.46E+01 | 2.46E+01 | 10.00 | 3.20 | P21291   | CSRP1    |
| 495.1  | Protein FLJ22184                   | 2.93E+04 | 7.21E+05 | 2.46E+01 | 2.46E+01 | 10.00 | 3.20 | F5H1R7   | FLJ22184 |
| 28.1   | Isocitrate dehydrogenase [NADP     | 1.81E+06 | 4.42E+07 | 2.44E+01 | 2.44E+01 | 10.00 | 3.20 | P48735   | IDH2     |
| 261.1  | Isoform Long of Proteasome sub     | 3.86E+05 | 8.82E+06 | 2.28E+01 | 2.28E+01 | 10.00 | 3.13 | P25786-2 | PSMA1    |
| 783.1  | Eukaryotic translation initiation  | 2.04E+04 | 4.46E+05 | 2.18E+01 | 2.18E+01 | 10.00 | 3.08 | P78344   | EIF4G2   |
| 343.1  | Mesencephalic astrocyte-derive     | 2.28E+05 | 4.94E+06 | 2.16E+01 | 2.16E+01 | 10.00 | 3.07 | P55145   | MANF     |
| 669.1  | Regulation of nuclear pre-mRNA     | 7.31E+03 | 1.52E+05 | 2.08E+01 | 2.08E+01 | 10.00 | 3.03 | Q96P16   | RPRD1A   |
| 187.1  | Isoform 2 of Protein disulfide-isc | 4.49E+05 | 9.06E+06 | 2.02E+01 | 2.02E+01 | 10.00 | 3.00 | Q15084-2 | PDIA6    |
| 71.1   | Guanine nucleotide-binding pro     | 8.68E+05 | 1.75E+07 | 2.02E+01 | 2.02E+01 | 10.00 | 3.00 | P63244   | GNB2L1   |
| 263.1  | 28 kDa heat- and acid-stable ph    | 1.52E+05 | 3.05E+06 | 2.01E+01 | 2.01E+01 | 10.00 | 3.00 | Q13442   | PDAP1    |
| 232.1  | Valine--tRNA ligase                | 2.64E+05 | 5.22E+06 | 1.98E+01 | 1.98E+01 | 10.00 | 2.98 | P26640   | VARS     |
| 394.1  | Aspartate aminotransferase, cyt    | 2.48E+04 | 4.61E+05 | 1.86E+01 | 1.86E+01 | 10.00 | 2.92 | P17174   | GOT1     |
| 229.1  | Staphylococcal nuclease domair     | 2.06E+05 | 3.81E+06 | 1.85E+01 | 1.85E+01 | 10.00 | 2.92 | Q7KZF4   | SND1     |
| 694.1  | Cullin-4B                          | 7.30E+04 | 1.34E+06 | 1.84E+01 | 1.84E+01 | 10.00 | 2.91 | Q13620   | CUL4B    |
| 843.1  | Transcription initiation factor TF | 1.28E+05 | 2.31E+06 | 1.80E+01 | 1.80E+01 | 10.00 | 2.89 | Q5VWG9   | TAF3     |
| 179.1  | Creatine kinase U-type, mitochc    | 7.41E+05 | 1.32E+07 | 1.78E+01 | 1.78E+01 | 10.00 | 2.88 | P12532   | CKMT1A   |



|        |                                  |          |          |          |          |       |      |          |          |
|--------|----------------------------------|----------|----------|----------|----------|-------|------|----------|----------|
| 381.1  | Microtubule-associated protein   | 1.82E+05 | 3.19E+06 | 1.75E+01 | 1.75E+01 | 10.00 | 2.86 | Q15691   | MAPRE1   |
| 201.1  | ATP synthase subunit beta, mitc  | 5.64E+05 | 9.86E+06 | 1.75E+01 | 1.75E+01 | 10.00 | 2.86 | P06576   | ATP5B    |
| 216.1  | 40S ribosomal protein S18        | 4.70E+05 | 8.15E+06 | 1.73E+01 | 1.73E+01 | 10.00 | 2.85 | P62269   | RPS18    |
| 485.1  | Serrate RNA effector molecule f  | 8.19E+04 | 1.40E+06 | 1.71E+01 | 1.71E+01 | 10.00 | 2.84 | Q9BXP5   | SRRT     |
| 1362.1 | CDK5 regulatory subunit-associ   | 2.34E+05 | 3.85E+06 | 1.65E+01 | 1.65E+01 | 10.00 | 2.80 | F8WBJ0   | CDK5RAP2 |
| 637.1  | UPF0556 protein C19orf10         | 1.22E+05 | 1.96E+06 | 1.60E+01 | 1.60E+01 | 10.00 | 2.77 | Q969H8   | C19orf10 |
| 1134.1 | Protein pelota homolog           | 4.48E+04 | 7.00E+05 | 1.56E+01 | 1.56E+01 | 10.00 | 2.75 | Q9BRX2   | PELO     |
| 705.1  | Protein phosphatase 1M           | 7.42E+06 | 1.15E+08 | 1.55E+01 | 1.55E+01 | 10.00 | 2.74 | B7XGB9   | ppm1m    |
| 670.1  | Selenocysteine-specific elongati | 1.61E+04 | 2.47E+05 | 1.54E+01 | 1.54E+01 | 10.00 | 2.73 | P57772   | EEFSEC   |
| 31.1   | Microtubule-associated protein   | 1.62E+06 | 2.47E+07 | 1.53E+01 | 1.53E+01 | 10.00 | 2.73 | E7EVA0   | MAP4     |
| 172.1  | Bifunctional glutamate/proline-- | 1.57E+05 | 2.37E+06 | 1.51E+01 | 1.51E+01 | 10.00 | 2.72 | P07814   | EPRS     |
| 560.1  | AP-1 complex subunit gamma-1     | 1.26E+05 | 1.89E+06 | 1.50E+01 | 1.50E+01 | 10.00 | 2.71 | B3KXW5   | AP1G1    |
| 1485.1 | Leukotriene A-4 hydrolase        | 7.95E+03 | 1.18E+05 | 1.48E+01 | 1.48E+01 | 10.00 | 2.70 | P09960   | LTA4H    |
| 158.1  | Adenylate kinase 2, mitochondr   | 4.12E+05 | 6.12E+06 | 1.48E+01 | 1.48E+01 | 10.00 | 2.70 | P54819   | AK2      |
| 160.1  | Leucine-rich repeat-containing p | 4.86E+05 | 7.02E+06 | 1.44E+01 | 1.44E+01 | 10.00 | 2.67 | Q8N1G4   | LRRC47   |
| 176.1  | 40S ribosomal protein S9         | 6.58E+05 | 9.38E+06 | 1.43E+01 | 1.43E+01 | 10.00 | 2.66 | P46781   | RPS9     |
| 212.1  | 60S ribosomal protein L35        | 4.30E+06 | 6.08E+07 | 1.42E+01 | 1.42E+01 | 10.00 | 2.65 | P42766   | RPL35    |
| 518.1  | Thioredoxin-dependent peroxid    | 6.00E+05 | 8.47E+06 | 1.41E+01 | 1.41E+01 | 10.00 | 2.65 | P30048   | PRDX3    |
| 542.1  | Acylamino-acid-releasing enzym   | 1.83E+05 | 2.53E+06 | 1.38E+01 | 1.38E+01 | 10.00 | 2.63 | C9JIF9   | APEH     |
| 149.1  | 40S ribosomal protein S3a        | 7.76E+05 | 1.06E+07 | 1.37E+01 | 1.37E+01 | 10.00 | 2.61 | P61247   | RPS3A    |
| 388.1  | Isoform 2 of Proteasome activat  | 2.53E+05 | 3.45E+06 | 1.37E+01 | 1.37E+01 | 10.00 | 2.61 | P61289-2 | PSME3    |
| 702.1  | Non-histone chromosomal prot     | 1.66E+05 | 2.25E+06 | 1.36E+01 | 1.36E+01 | 10.00 | 2.61 | P05114   | HMGN1    |
| 418.1  | Flap endonuclease 1              | 6.37E+05 | 8.58E+06 | 1.35E+01 | 1.35E+01 | 10.00 | 2.60 | P39748   | FEN1     |
| 266.1  | 60S ribosomal protein L23        | 5.83E+05 | 7.80E+06 | 1.34E+01 | 1.34E+01 | 10.00 | 2.59 | P62829   | RPL23    |
| 142.1  | Isoform 3 of Elongation factor 1 | 8.05E+05 | 1.07E+07 | 1.33E+01 | 1.33E+01 | 10.00 | 2.59 | P29692-3 | EEF1D    |
| 243.1  | Serine/threonine-protein phosp   | 4.23E+05 | 5.58E+06 | 1.32E+01 | 1.32E+01 | 10.00 | 2.58 | P62140   | PPP1CB   |
| 186.1  | Heterogeneous nuclear ribonuc    | 1.13E+06 | 1.48E+07 | 1.31E+01 | 1.31E+01 | 10.00 | 2.57 | P09651   | HNRNPA1  |
| 598.1  | ATP-dependent RNA helicase DI    | 8.38E+04 | 1.09E+06 | 1.30E+01 | 1.30E+01 | 10.00 | 2.57 | Q86XP3   | DDX42    |
| 516.1  | U2 snRNP-associated SURP moti    | 1.08E+05 | 1.40E+06 | 1.29E+01 | 1.29E+01 | 10.00 | 2.56 | E7ET15   | U2SURP   |
| 464.1  | Proteasome subunit beta type-ε   | 5.40E+04 | 6.90E+05 | 1.28E+01 | 1.28E+01 | 10.00 | 2.55 | P28072   | PSMB6    |
| 639.1  | Keratin, type I cuticular Ha1    | 1.43E+06 | 1.81E+07 | 1.27E+01 | 1.27E+01 | 10.00 | 2.54 | Q15323   | KRT31    |
| 65.1   | DNA-dependent protein kinase     | 8.35E+05 | 1.05E+07 | 1.26E+01 | 1.26E+01 | 10.00 | 2.53 | P78527   | PRKDC    |
| 644.1  | Vacuolar protein sorting-associ  | 1.23E+04 | 1.51E+05 | 1.22E+01 | 1.22E+01 | 10.00 | 2.50 | Q709C8   | VPS13C   |
| 439.1  | 40S ribosomal protein S30        | 3.71E+05 | 4.48E+06 | 1.21E+01 | 1.21E+01 | 10.00 | 2.49 | E9PR30   | FAU      |
| 497.1  | Hematological and neurological   | 2.60E+04 | 3.05E+05 | 1.17E+01 | 1.17E+01 | 10.00 | 2.46 | B4DLH4   | HN1L     |

|        |                                    |          |          |          |          |       |      |          |        |
|--------|------------------------------------|----------|----------|----------|----------|-------|------|----------|--------|
| 114.1  | Proliferation-associated protein   | 7.66E+05 | 8.97E+06 | 1.17E+01 | 1.17E+01 | 10.00 | 2.46 | Q9UQ80   | PA2G4  |
| 178.1  | NHP2 non-histone chromosome        | 1.41E+06 | 1.62E+07 | 1.15E+01 | 1.15E+01 | 10.00 | 2.44 | B1AHD1   | NHP2L1 |
| 18.1   | Propionyl-CoA carboxylase alph     | 3.96E+06 | 4.34E+07 | 1.10E+01 | 1.10E+01 | 10.00 | 2.39 | P05165   | PCCA   |
| 3.4    | Keratin, type II cytoskeletal 2 ep | 2.45E+05 | 2.64E+06 | 1.08E+01 | 1.08E+01 | 10.00 | 2.38 | P35908   | KRT2   |
| 289.1  | Tripeptidyl-peptidase 1            | 4.50E+05 | 4.81E+06 | 1.07E+01 | 1.07E+01 | 10.00 | 2.37 | O14773   | TPP1   |
| 22.1   | Propionyl-CoA carboxylase beta     | 3.26E+06 | 3.40E+07 | 1.04E+01 | 1.04E+01 | 10.00 | 2.35 | E7EX59   | PCCB   |
| 622.1  | Proteasome subunit alpha type-     | 5.87E+04 | 6.00E+05 | 1.02E+01 | 1.02E+01 | 10.00 | 2.32 | O14818   | PSMA7  |
| 552.1  | Eukaryotic translation initiation  | 2.02E+06 | 2.04E+07 | 1.01E+01 | 1.01E+01 | 10.00 | 2.31 | K7EM18   | EIF1   |
| 659.1  | Developmentally-regulated GTP      | 9.18E+04 | 9.14E+05 | 9.96E+00 | 9.96E+00 | 9.96  | 2.30 | Q9Y295   | DRG1   |
| 651.1  | AP-1 complex subunit beta-1        | 2.10E+05 | 2.08E+06 | 9.89E+00 | 9.89E+00 | 9.89  | 2.29 | Q10567   | AP1B1  |
| 51.3   | Ezrin                              | 1.01E+05 | 9.88E+05 | 9.77E+00 | 9.77E+00 | 9.77  | 2.28 | P15311   | EZR    |
| 664.1  | Selenide, water dikinase 1         | 2.72E+05 | 2.53E+06 | 9.30E+00 | 9.30E+00 | 9.30  | 2.23 | P49903   | SEPHS1 |
| 72.1   | 10 kDa heat shock protein, mito    | 3.16E+06 | 2.94E+07 | 9.29E+00 | 9.29E+00 | 9.29  | 2.23 | P61604   | HSPE1  |
| 568.1  | 60S ribosomal protein L3-like      | 4.87E+04 | 4.52E+05 | 9.28E+00 | 9.28E+00 | 9.28  | 2.23 | Q92901   | RPL3L  |
| 647.1  | Ubiquilin-4                        | 8.04E+04 | 7.39E+05 | 9.19E+00 | 9.19E+00 | 9.19  | 2.22 | Q9NRR5   | UBQLN4 |
| 254.1  | 6-phosphofructokinase              | 1.25E+06 | 1.15E+07 | 9.17E+00 | 9.17E+00 | 9.17  | 2.22 | P08237   | PFKM   |
| 436.1  | Ribonuclease inhibitor             | 2.54E+05 | 2.30E+06 | 9.06E+00 | 9.06E+00 | 9.06  | 2.20 | P13489   | RNH1   |
| 848.1  | WD repeat-containing protein V     | 6.80E+04 | 6.14E+05 | 9.02E+00 | 9.02E+00 | 9.02  | 2.20 | Q9P2S5   | WRAP73 |
| 204.1  | Exportin-2                         | 6.15E+05 | 5.37E+06 | 8.74E+00 | 8.74E+00 | 8.74  | 2.17 | P55060   | CSE1L  |
| 330.1  | Aspartate aminotransferase, mi     | 1.36E+05 | 1.19E+06 | 8.72E+00 | 8.72E+00 | 8.72  | 2.17 | P00505   | GOT2   |
| 804.1  | Histone-lysine N-methyltransfer    | 4.95E+04 | 4.17E+05 | 8.42E+00 | 8.42E+00 | 8.42  | 2.13 | Q9NR48   | ASH1L  |
| 593.1  | Serine-threonine kinase recepto    | 4.52E+04 | 3.77E+05 | 8.34E+00 | 8.34E+00 | 8.34  | 2.12 | B4DNJ6   | STRAP  |
| 79.1   | Keratin, type II cytoskeletal 1    | 2.02E+06 | 1.67E+07 | 8.26E+00 | 8.26E+00 | 8.26  | 2.11 | P04264   | KRT1   |
| 350.1  | Pyrroline-5-carboxylate reducta    | 5.14E+05 | 4.24E+06 | 8.26E+00 | 8.26E+00 | 8.26  | 2.11 | Q53H96   | PYCRL  |
| 1154.1 | Isoform 2 of Nesprin-2             | 8.40E+04 | 6.89E+05 | 8.20E+00 | 8.20E+00 | 8.20  | 2.10 | Q8WXH0-2 | SYNE2  |
| 280.1  | Eukaryotic translation initiation  | 2.46E+05 | 2.01E+06 | 8.18E+00 | 8.18E+00 | 8.18  | 2.10 | P05198   | EIF2S1 |
| 297.1  | Prosaposin                         | 1.01E+06 | 8.16E+06 | 8.07E+00 | 8.07E+00 | 8.07  | 2.09 | B1AVU8   | PSAP   |
| 239.1  | Talin-1                            | 6.50E+05 | 5.22E+06 | 8.03E+00 | 8.03E+00 | 8.03  | 2.08 | Q9Y490   | TLN1   |
| 445.1  | Cancer-related nucleoside-triph    | 7.70E+04 | 6.01E+05 | 7.80E+00 | 7.80E+00 | 7.80  | 2.05 | Q9BSD7   | NTPCR  |
| 222.1  | Inosine-5'-monophosphate dehy      | 8.66E+05 | 6.52E+06 | 7.53E+00 | 7.53E+00 | 7.53  | 2.02 | P12268   | IMPDH2 |
| 515.1  | Programmed cell death protein      | 1.86E+05 | 1.39E+06 | 7.47E+00 | 7.47E+00 | 7.47  | 2.01 | Q53EL6   | PDCD4  |
| 353.1  | Isoform 2 of C-terminal-binding    | 9.31E+04 | 6.95E+05 | 7.46E+00 | 7.46E+00 | 7.46  | 2.01 | P56545-2 | CTBP2  |
| 413.1  | Eukaryotic peptide chain release   | 4.09E+05 | 3.05E+06 | 7.45E+00 | 7.45E+00 | 7.45  | 2.01 | P62495   | ETF1   |
| 43.2   | 116 kDa U5 small nuclear ribonu    | 1.21E+05 | 9.02E+05 | 7.43E+00 | 7.43E+00 | 7.43  | 2.01 | Q15029   | EFTUD2 |
| 231.1  | Isoform 2 of Threonine--tRNA lig   | 3.31E+05 | 2.45E+06 | 7.41E+00 | 7.41E+00 | 7.41  | 2.00 | P26639-2 | TARS   |

|        |                                    |          |          |          |          |      |      |          |          |
|--------|------------------------------------|----------|----------|----------|----------|------|------|----------|----------|
| 478.1  | Keratin, type I cuticular Ha7      | 2.42E+06 | 1.78E+07 | 7.37E+00 | 7.37E+00 | 7.37 | 2.00 | O76014   | KRT37    |
| 786.1  | Mitogen-activated protein kinas    | 1.66E+05 | 1.22E+06 | 7.36E+00 | 7.36E+00 | 7.36 | 2.00 | P27361   | MAPK3    |
| 483.1  | Nuclear mitotic apparatus prote    | 7.18E+04 | 5.26E+05 | 7.33E+00 | 7.33E+00 | 7.33 | 1.99 | Q14980   | NUMA1    |
| 602.1  | SUMO-conjugating enzyme UBC        | 6.51E+05 | 4.72E+06 | 7.25E+00 | 7.25E+00 | 7.25 | 1.98 | B0QYN7   | UBE2I    |
| 479.1  | HLA-B associated transcript 3, is  | 8.86E+04 | 6.40E+05 | 7.23E+00 | 7.23E+00 | 7.23 | 1.98 | G3V1Z5   | NULL     |
| 623.1  | Epithelial splicing regulatory prc | 7.85E+04 | 5.66E+05 | 7.21E+00 | 7.21E+00 | 7.21 | 1.98 | Q6NXG1   | ESRP1    |
| 965.1  | Zinc finger protein 207            | 1.16E+05 | 8.28E+05 | 7.12E+00 | 7.12E+00 | 7.12 | 1.96 | O43670   | ZNF207   |
| 895.1  | S-adenosylmethionine synthase      | 2.87E+05 | 2.03E+06 | 7.07E+00 | 7.07E+00 | 7.07 | 1.96 | Q00266   | MAT1A    |
| 367.1  | E3 SUMO-protein ligase RanBP2      | 5.39E+05 | 3.76E+06 | 6.98E+00 | 6.98E+00 | 6.98 | 1.94 | P49792   | RANBP2   |
| 306.1  | Isoform 5 of Splicing factor 1     | 1.50E+06 | 1.03E+07 | 6.88E+00 | 6.88E+00 | 6.88 | 1.93 | Q15637-5 | SF1      |
| 1348.1 | Isoform 1 of Metabotropic gluta    | 1.33E+05 | 9.18E+05 | 6.88E+00 | 6.88E+00 | 6.88 | 1.93 | P41594-2 | GRM5     |
| 395.1  | DNA damage-binding protein 1       | 3.81E+04 | 2.58E+05 | 6.77E+00 | 6.77E+00 | 6.77 | 1.91 | Q16531   | DDB1     |
| 484.1  | Proteasome activator complex s     | 1.72E+05 | 1.14E+06 | 6.63E+00 | 6.63E+00 | 6.63 | 1.89 | Q06323   | PSME1    |
| 482.1  | Isoform 2 of TAR DNA-binding p     | 2.39E+05 | 1.56E+06 | 6.54E+00 | 6.54E+00 | 6.54 | 1.88 | Q13148-2 | TARDBP   |
| 362.1  | Importin subunit beta-1            | 2.24E+05 | 1.45E+06 | 6.46E+00 | 6.46E+00 | 6.46 | 1.87 | Q14974   | KPNB1    |
| 1316.1 | Kallistatin                        | 2.38E+04 | 1.53E+05 | 6.44E+00 | 6.44E+00 | 6.44 | 1.86 | P29622   | SERPINA4 |
| 400.1  | Isoform 2 of Partner of Y14 and    | 3.81E+04 | 2.45E+05 | 6.43E+00 | 6.43E+00 | 6.43 | 1.86 | Q9BRP8-2 | WIBG     |
| 535.1  | Isoform 2 of Serine/threonine-p    | 4.07E+05 | 2.60E+06 | 6.38E+00 | 6.38E+00 | 6.38 | 1.85 | P63151-2 | PPP2R2A  |
| 236.1  | Hsc70-interacting protein          | 6.19E+05 | 3.89E+06 | 6.29E+00 | 6.29E+00 | 6.29 | 1.84 | P50502   | ST13     |
| 1139.1 | Superoxide dismutase [Cu-Zn]       | 2.52E+05 | 1.58E+06 | 6.28E+00 | 6.28E+00 | 6.28 | 1.84 | P00441   | SOD1     |
| 299.1  | ATP-citrate synthase               | 1.51E+05 | 9.44E+05 | 6.27E+00 | 6.27E+00 | 6.27 | 1.84 | P53396   | ACLY     |
| 902.1  | Laminin subunit beta-3             | 7.52E+04 | 4.68E+05 | 6.22E+00 | 6.22E+00 | 6.22 | 1.83 | Q13751   | LAMB3    |
| 36.1   | Transitional endoplasmic reticul   | 3.61E+06 | 2.20E+07 | 6.10E+00 | 6.10E+00 | 6.10 | 1.81 | P55072   | VCP      |
| 227.1  | Aspartate--tRNA ligase, cytoplas   | 5.16E+05 | 3.14E+06 | 6.09E+00 | 6.09E+00 | 6.09 | 1.81 | P14868   | DARS     |
| 844.1  | Dynein light chain roadblock-tyr   | 9.89E+04 | 5.98E+05 | 6.05E+00 | 6.05E+00 | 6.05 | 1.80 | B1AKR6   | DYNLRB1  |
| 592.1  | 60 kDa SS-A/Ro ribonucleoprote     | 1.51E+05 | 8.95E+05 | 5.94E+00 | 5.94E+00 | 5.94 | 1.78 | P10155   | TROVE2   |
| 137.1  | 40S ribosomal protein S11          | 2.93E+06 | 1.74E+07 | 5.93E+00 | 5.93E+00 | 5.93 | 1.78 | P62280   | RPS11    |
| 54.1   | Peptidyl-prolyl cis-trans isomera  | 5.66E+06 | 3.34E+07 | 5.90E+00 | 5.90E+00 | 5.90 | 1.77 | P23284   | PPIB     |
| 16.1   | 60 kDa heat shock protein, mito    | 1.70E+07 | 1.00E+08 | 5.89E+00 | 5.89E+00 | 5.89 | 1.77 | P10809   | HSPD1    |
| 369.1  | Profilin-2                         | 1.05E+05 | 6.13E+05 | 5.83E+00 | 5.83E+00 | 5.83 | 1.76 | P35080   | PFN2     |
| 356.1  | Isoform 2 of Regulator of nonse    | 3.64E+05 | 2.11E+06 | 5.80E+00 | 5.80E+00 | 5.80 | 1.76 | Q92900-2 | UPF1     |
| 305.1  | 26S protease regulatory subunit    | 5.62E+05 | 3.23E+06 | 5.75E+00 | 5.75E+00 | 5.75 | 1.75 | P35998   | PSMC2    |
| 548.1  | Isoform 2 of Histone-binding prc   | 2.09E+05 | 1.20E+06 | 5.73E+00 | 5.73E+00 | 5.73 | 1.75 | Q16576-2 | RBBP7    |
| 132.1  | Poly(rC)-binding protein 1         | 6.25E+05 | 3.49E+06 | 5.59E+00 | 5.59E+00 | 5.59 | 1.72 | Q15365   | PCBP1    |
| 1176.1 | Mucin-16                           | 1.08E+05 | 6.00E+05 | 5.55E+00 | 5.55E+00 | 5.55 | 1.71 | Q8WXI7   | MUC16    |

|        |                                   |          |          |          |          |      |      |          |          |
|--------|-----------------------------------|----------|----------|----------|----------|------|------|----------|----------|
| 295.1  | Alcohol dehydrogenase [NADP(-     | 8.46E+05 | 4.65E+06 | 5.50E+00 | 5.50E+00 | 5.50 | 1.70 | P14550   | AKR1A1   |
| 426.1  | 26S protease regulatory subunit   | 5.90E+05 | 3.23E+06 | 5.47E+00 | 5.47E+00 | 5.47 | 1.70 | P43686   | PSMC4    |
| 194.1  | Isoform 2 of General vesicular tr | 1.18E+06 | 6.13E+06 | 5.18E+00 | 5.18E+00 | 5.18 | 1.65 | O60763-2 | USO1     |
| 603.1  | Microtubule-actin cross-linking f | 3.44E+05 | 1.75E+06 | 5.09E+00 | 5.09E+00 | 5.09 | 1.63 | H3BQK9   | MACF1    |
| 699.1  | Clathrin light chain B            | 9.43E+04 | 4.78E+05 | 5.07E+00 | 5.07E+00 | 5.07 | 1.62 | P09497   | CLTB     |
| 89.1   | Cytochrome c                      | 6.38E+06 | 3.23E+07 | 5.06E+00 | 5.06E+00 | 5.06 | 1.62 | P99999   | CYCS     |
| 130.1  | Thymocyte nuclear protein 1       | 2.72E+06 | 1.37E+07 | 5.04E+00 | 5.04E+00 | 5.04 | 1.62 | Q9P016   | THYN1    |
| 214.1  | Alpha-2-HS-glycoprotein           | 9.77E+05 | 4.85E+06 | 4.97E+00 | 4.97E+00 | 4.97 | 1.60 | P02765   | AHSG     |
| 871.1  | ATPase inhibitor, mitochondrial   | 6.56E+05 | 3.19E+06 | 4.86E+00 | 4.86E+00 | 4.86 | 1.58 | Q9UII2   | ATPIF1   |
| 1279.1 | GDP-fucose protein O-fucosyltra   | 5.90E+04 | 2.80E+05 | 4.74E+00 | 4.74E+00 | 4.74 | 1.56 | Q9H488   | POFUT1   |
| 718.1  | Galactokinase                     | 1.32E+05 | 6.27E+05 | 4.73E+00 | 4.73E+00 | 4.73 | 1.55 | B4E1G6   | GALK1    |
| 110.1  | Isoform 2 of Coatomer subunit c   | 2.69E+06 | 1.26E+07 | 4.69E+00 | 4.69E+00 | 4.69 | 1.54 | P53621-2 | COPA     |
| 254.3  | Isoform 2 of 6-phosphofructokir   | 5.05E+05 | 2.36E+06 | 4.67E+00 | 4.67E+00 | 4.67 | 1.54 | P17858-2 | PFKL     |
| 1021.1 | Sodium/potassium/calcium excl     | 4.80E+04 | 2.22E+05 | 4.62E+00 | 4.62E+00 | 4.62 | 1.53 | Q71RS6   | SLC24A5  |
| 1010.1 | Cystatin-C                        | 6.43E+04 | 2.96E+05 | 4.60E+00 | 4.60E+00 | 4.60 | 1.53 | P01034   | CST3     |
| 522.1  | Cytoplasmic dynein 1 light inter  | 7.47E+04 | 3.42E+05 | 4.58E+00 | 4.58E+00 | 4.58 | 1.52 | O43237   | DYNC1LI2 |
| 551.1  | Isoform 2 of Cytoplasmic FMR1-    | 3.21E+05 | 1.47E+06 | 4.57E+00 | 4.57E+00 | 4.57 | 1.52 | Q7L576-2 | CYFIP1   |
| 96.1   | Far upstream element-binding p    | 7.40E+05 | 3.34E+06 | 4.51E+00 | 4.51E+00 | 4.51 | 1.51 | Q92945   | KHSRP    |
| 1401.1 | Serine/threonine-protein phosph   | 5.25E+04 | 2.36E+05 | 4.50E+00 | 4.50E+00 | 4.50 | 1.50 | P67775   | PPP2CA   |
| 349.1  | Methionine--tRNA ligase, cytopl   | 1.10E+06 | 4.95E+06 | 4.49E+00 | 4.49E+00 | 4.49 | 1.50 | P56192   | MARS     |
| 476.1  | Eukaryotic translation initiation | 2.07E+05 | 9.14E+05 | 4.41E+00 | 4.41E+00 | 4.41 | 1.48 | E7EX17   | EIF4B    |
| 500.1  | V(D)J recombination-activating p  | 1.76E+05 | 7.62E+05 | 4.33E+00 | 4.33E+00 | 4.33 | 1.47 | P15918   | RAG1     |
| 121.1  | Elongation factor 1-gamma         | 3.57E+06 | 1.54E+07 | 4.32E+00 | 4.32E+00 | 4.32 | 1.46 | B4DTG2   | EEF1G    |
| 967.1  | Isoform 1 of Tudor domain-cont    | 2.22E+05 | 9.59E+05 | 4.31E+00 | 4.31E+00 | 4.31 | 1.46 | Q8NAT2-1 | TDRD5    |
| 1393.1 | Folliculin-interacting protein 1  | 3.35E+03 | 1.44E+04 | 4.30E+00 | 4.30E+00 | 4.30 | 1.46 | E9PCH4   | FNIP1    |
| 124.1  | Nucleolin                         | 2.68E+06 | 1.14E+07 | 4.26E+00 | 4.26E+00 | 4.26 | 1.45 | P19338   | NCL      |
| 136.1  | 26S proteasome non-ATPase re      | 7.15E+05 | 3.03E+06 | 4.24E+00 | 4.24E+00 | 4.24 | 1.44 | Q13200   | PSMD2    |
| 169.1  | Keratin, type I cytoskeletal 10   | 9.94E+05 | 4.13E+06 | 4.16E+00 | 4.16E+00 | 4.16 | 1.42 | P13645   | KRT10    |
| 352.1  | 26S protease regulatory subunit   | 1.28E+06 | 5.31E+06 | 4.14E+00 | 4.14E+00 | 4.14 | 1.42 | P17980   | PSMC3    |
| 487.1  | Protein phosphatase 1G            | 1.09E+05 | 4.51E+05 | 4.13E+00 | 4.13E+00 | 4.13 | 1.42 | O15355   | PPM1G    |
| 132.2  | Isoform 2 of Poly(rC)-binding pr  | 1.41E+06 | 5.66E+06 | 4.03E+00 | 4.03E+00 | 4.03 | 1.39 | Q15366-2 | PCBP2    |
| 1127.1 | Isoform Alpha-2 of Glucocortico   | 1.55E+05 | 5.94E+05 | 3.84E+00 | 3.84E+00 | 3.84 | 1.35 | P04150-3 | NR3C1    |
| 1.1    | Plectin                           | 5.07E+07 | 1.94E+08 | 3.83E+00 | 3.83E+00 | 3.83 | 1.34 | Q15149   | PLEC     |
| 242.1  | Calcyclin-binding protein         | 1.14E+06 | 4.37E+06 | 3.83E+00 | 3.83E+00 | 3.83 | 1.34 | Q9HB71   | CACYBP   |
| 999.1  | Malate dehydrogenase              | 3.60E+05 | 1.37E+06 | 3.81E+00 | 3.81E+00 | 3.81 | 1.34 | P40925   | MDH1     |

|        |                                   |          |          |          |          |      |      |          |          |
|--------|-----------------------------------|----------|----------|----------|----------|------|------|----------|----------|
| 614.1  | ADP-ribosylation factor-like prot | 7.47E+05 | 2.84E+06 | 3.80E+00 | 3.80E+00 | 3.80 | 1.34 | F8VYN9   | ARL1     |
| 265.1  | Polyadenylate-binding protein 1   | 1.07E+06 | 4.07E+06 | 3.80E+00 | 3.80E+00 | 3.80 | 1.33 | P11940   | PABPC1   |
| 926.1  | ATP-binding cassette sub-family   | 1.19E+04 | 4.51E+04 | 3.78E+00 | 3.78E+00 | 3.78 | 1.33 | Q8NE71   | ABCF1    |
| 69.1   | Spliceosome RNA helicase DDX3     | 2.78E+06 | 1.05E+07 | 3.78E+00 | 3.78E+00 | 3.78 | 1.33 | F8VQ10   | DDX39B   |
| 1375.1 | CD180 antigen                     | 9.31E+04 | 3.49E+05 | 3.75E+00 | 3.75E+00 | 3.75 | 1.32 | Q99467   | CD180    |
| 105.1  | Histone H4                        | 7.46E+06 | 2.78E+07 | 3.73E+00 | 3.73E+00 | 3.73 | 1.32 | P62805   | HIST1H4A |
| 510.1  | Structural maintenance of chror   | 2.32E+05 | 8.61E+05 | 3.72E+00 | 3.72E+00 | 3.72 | 1.31 | A6NHR9   | SMCHD1   |
| 446.1  | Dihydropyrimidinase-related pr    | 4.40E+05 | 1.63E+06 | 3.71E+00 | 3.71E+00 | 3.71 | 1.31 | Q16555   | DPYSL2   |
| 954.1  | Cytoplasmic dynein 1 light inter  | 1.92E+04 | 7.07E+04 | 3.68E+00 | 3.68E+00 | 3.68 | 1.30 | Q9Y6G9   | DYNC1L1  |
| 877.1  | FYN-binding protein               | 1.75E+05 | 6.27E+05 | 3.58E+00 | 3.58E+00 | 3.58 | 1.28 | O15117   | FYB      |
| 1059.1 | 60S ribosomal protein L31         | 1.86E+05 | 6.63E+05 | 3.56E+00 | 3.56E+00 | 3.56 | 1.27 | B7Z4C8   | RPL31    |
| 1223.1 | Probable phospholipid-transport   | 1.20E+05 | 4.20E+05 | 3.49E+00 | 3.49E+00 | 3.49 | 1.25 | Q9P241   | ATP10D   |
| 10.1   | Clathrin heavy chain 1            | 1.28E+07 | 4.45E+07 | 3.47E+00 | 3.47E+00 | 3.47 | 1.24 | Q00610   | CLTC     |
| 1014.1 | DNA fragmentation factor subun    | 1.98E+05 | 6.84E+05 | 3.45E+00 | 3.45E+00 | 3.45 | 1.24 | O00273   | DFFA     |
| 863.1  | Isoform 6 of Ankyrin repeat and   | 1.85E+05 | 6.32E+05 | 3.42E+00 | 3.42E+00 | 3.42 | 1.23 | Q8IWZ3-6 | ANKHD1   |
| 761.1  | Transcription factor BTF3         | 9.29E+05 | 3.16E+06 | 3.40E+00 | 3.40E+00 | 3.40 | 1.22 | P20290   | BTF3     |
| 329.1  | Isoleucine--tRNA ligase, cytopla  | 6.04E+05 | 2.04E+06 | 3.38E+00 | 3.38E+00 | 3.38 | 1.22 | P41252   | IARS     |
| 107.1  | Archain 1, isoform CRA_a          | 4.48E+06 | 1.51E+07 | 3.37E+00 | 3.37E+00 | 3.37 | 1.22 | B0YIW6   | ARCN1    |
| 1467.1 | SET and MYND domain-containing    | 8.94E+04 | 2.97E+05 | 3.32E+00 | 3.32E+00 | 3.32 | 1.20 | Q9H7B4   | SMYD3    |
| 93.1   | Peptidyl-prolyl cis-trans isomera | 7.29E+06 | 2.37E+07 | 3.25E+00 | 3.25E+00 | 3.25 | 1.18 | Q02790   | FKBP4    |
| 874.1  | Centromere-associated protein     | 1.09E+05 | 3.54E+05 | 3.24E+00 | 3.24E+00 | 3.24 | 1.18 | Q02224   | CENPE    |
| 254.2  | 6-phosphofructokinase             | 1.52E+06 | 4.89E+06 | 3.22E+00 | 3.22E+00 | 3.22 | 1.17 | Q01813   | PFKP     |
| 1041.1 | Myosin-2                          | 8.46E+04 | 2.71E+05 | 3.20E+00 | 3.20E+00 | 3.20 | 1.16 | Q9UKX2   | MYH2     |
| 473.1  | Splicing factor 3B subunit 3      | 3.10E+05 | 9.88E+05 | 3.18E+00 | 3.18E+00 | 3.18 | 1.16 | Q15393   | SF3B3    |
| 315.1  | Chloride intracellular channel pr | 9.26E+05 | 2.94E+06 | 3.17E+00 | 3.17E+00 | 3.17 | 1.16 | O00299   | CLIC1    |
| 39.1   | Alpha-enolase                     | 1.69E+07 | 5.27E+07 | 3.12E+00 | 3.12E+00 | 3.12 | 1.14 | P06733   | ENO1     |
| 87.1   | 40S ribosomal protein S13         | 1.06E+07 | 3.28E+07 | 3.09E+00 | 3.09E+00 | 3.09 | 1.13 | P62277   | RPS13    |
| 173.1  | Phosphoenolpyruvate carboxyki     | 1.64E+06 | 5.05E+06 | 3.08E+00 | 3.08E+00 | 3.08 | 1.13 | Q16822   | PCK2     |
| 29.1   | D-3-phosphoglycerate dehydrog     | 1.42E+07 | 4.36E+07 | 3.08E+00 | 3.08E+00 | 3.08 | 1.13 | O43175   | PHGDH    |
| 294.1  | Fructose-bisphosphate aldolase    | 2.15E+06 | 6.62E+06 | 3.07E+00 | 3.07E+00 | 3.07 | 1.12 | P09972   | ALDOC    |
| 311.1  | Nucleoprotein TPR                 | 9.67E+05 | 2.94E+06 | 3.04E+00 | 3.04E+00 | 3.04 | 1.11 | P12270   | TPR      |
| 660.1  | Phosphoserine phosphatase         | 9.50E+04 | 2.88E+05 | 3.03E+00 | 3.03E+00 | 3.03 | 1.11 | P78330   | PSPH     |
| 1122.1 | Isoform 5 of Nitric oxide syntha  | 7.65E+04 | 2.30E+05 | 3.01E+00 | 3.01E+00 | 3.01 | 1.10 | P29475-5 | NOS1     |
| 819.1  | Multidrug resistance-associated   | 6.96E+04 | 2.09E+05 | 3.00E+00 | 3.00E+00 | 3.00 | 1.10 | O15440   | ABCC5    |
| 384.1  | Oxysterol-binding protein 1       | 1.27E+05 | 3.75E+05 | 2.94E+00 | 2.94E+00 | 2.94 | 1.08 | P22059   | OSBP     |

|        |                                    |          |          |          |          |      |      |          |          |
|--------|------------------------------------|----------|----------|----------|----------|------|------|----------|----------|
| 94.1   | Glyceraldehyde-3-phosphate de      | 2.85E+07 | 8.38E+07 | 2.94E+00 | 2.94E+00 | 2.94 | 1.08 | P04406   | GAPDH    |
| 821.1  | Hsp90 co-chaperone Cdc37           | 2.67E+05 | 7.79E+05 | 2.92E+00 | 2.92E+00 | 2.92 | 1.07 | Q16543   | CDC37    |
| 51.2   | Moesin                             | 1.83E+06 | 5.33E+06 | 2.91E+00 | 2.91E+00 | 2.91 | 1.07 | P26038   | MSN      |
| 646.1  | Hydroxyacylglutathione hydrola     | 2.65E+05 | 7.69E+05 | 2.90E+00 | 2.90E+00 | 2.90 | 1.07 | Q16775   | HAGH     |
| 1491.1 | DNA polymerase                     | 3.04E+05 | 8.77E+05 | 2.88E+00 | 2.88E+00 | 2.88 | 1.06 | E7ETS8   | POLE     |
| 44.2   | Peroxiredoxin-2                    | 2.25E+07 | 6.39E+07 | 2.83E+00 | 2.83E+00 | 2.83 | 1.04 | P32119   | PRDX2    |
| 307.1  | Serine/threonine-protein kinase    | 1.55E+06 | 4.34E+06 | 2.81E+00 | 2.81E+00 | 2.81 | 1.03 | Q13177   | PAK2     |
| 800.1  | Unconventional myosin-Va           | 9.09E+04 | 2.54E+05 | 2.79E+00 | 2.79E+00 | 2.79 | 1.03 | F8W6H6   | MYO5A    |
| 494.1  | Putative RNA-binding protein Lu    | 4.68E+05 | 1.29E+06 | 2.76E+00 | 2.76E+00 | 2.76 | 1.01 | Q9Y383   | LUC7L2   |
| 140.1  | Rab GDP dissociation inhibitor b   | 1.82E+06 | 5.01E+06 | 2.75E+00 | 2.75E+00 | 2.75 | 1.01 | E7EU23   | GDI2     |
| 20.5   | Heat shock protein 75 kDa, mitc    | 3.36E+06 | 9.21E+06 | 2.74E+00 | 2.74E+00 | 2.74 | 1.01 | Q12931   | TRAP1    |
| 366.1  | Eukaryotic translation initiation  | 4.00E+05 | 1.09E+06 | 2.72E+00 | 2.72E+00 | 2.72 | 1.00 | Q15056   | EIF4H    |
| 457.1  | 182 kDa tankyrase-1-binding pro    | 1.96E+05 | 5.32E+05 | 2.71E+00 | 2.71E+00 | 2.71 | 1.00 | Q9C0C2   | TNKS1BP1 |
| 947.1  | V-type proton ATPase subunit E     | 9.49E+05 | 2.57E+06 | 2.71E+00 | 2.71E+00 | 2.71 | 1.00 | P36543   | ATP6V1E1 |
| 528.1  | Enhancer of mRNA-decapping p       | 1.43E+06 | 3.84E+06 | 2.69E+00 | 2.69E+00 | 2.69 | 0.99 | Q6P2E9   | EDC4     |
| 550.1  | Acetyl-CoA acetyltransferase, cy   | 3.48E+05 | 9.30E+05 | 2.67E+00 | 2.67E+00 | 2.67 | 0.98 | B7Z233   | ACAT2    |
| 241.1  | V-type proton ATPase subunit B     | 3.94E+06 | 1.05E+07 | 2.66E+00 | 2.66E+00 | 2.66 | 0.98 | P21281   | ATP6V1B2 |
| 561.1  | COP9 signalosome complex sub       | 2.19E+05 | 5.83E+05 | 2.66E+00 | 2.66E+00 | 2.66 | 0.98 | D6RFN0   | COPS4    |
| 300.1  | Ribose-phosphate pyrophospho       | 1.84E+06 | 4.87E+06 | 2.65E+00 | 2.65E+00 | 2.65 | 0.97 | P21108   | PRPS1L1  |
| 1236.1 | Ubiquitin carboxyl-terminal hyd    | 7.56E+04 | 2.00E+05 | 2.64E+00 | 2.64E+00 | 2.64 | 0.97 | Q70CQ1   | USP49    |
| 155.1  | 40S ribosomal protein S7           | 9.33E+06 | 2.45E+07 | 2.63E+00 | 2.63E+00 | 2.63 | 0.97 | P62081   | RPS7     |
| 725.1  | Peptidyl-prolyl cis-trans isomera  | 3.40E+05 | 8.90E+05 | 2.62E+00 | 2.62E+00 | 2.62 | 0.96 | K7EMU7   | PIN1     |
| 219.1  | Isoform 2 of Electron transfer fl  | 3.14E+06 | 8.23E+06 | 2.62E+00 | 2.62E+00 | 2.62 | 0.96 | P38117-2 | ETFB     |
| 1220.1 | Zinc finger and BTB domain-con     | 1.99E+05 | 5.20E+05 | 2.61E+00 | 2.61E+00 | 2.61 | 0.96 | P10074   | ZBTB48   |
| 390.1  | Eukaryotic translation initiation  | 9.74E+05 | 2.51E+06 | 2.58E+00 | 2.58E+00 | 2.58 | 0.95 | Q04637   | EIF4G1   |
| 739.1  | Protein TFG                        | 1.96E+05 | 4.92E+05 | 2.51E+00 | 2.51E+00 | 2.51 | 0.92 | Q92734   | TFG      |
| 652.1  | CAD protein                        | 1.60E+04 | 3.99E+04 | 2.50E+00 | 2.50E+00 | 2.50 | 0.92 | P27708   | CAD      |
| 125.1  | Transcription elongation factor ,  | 6.40E+06 | 1.59E+07 | 2.48E+00 | 2.48E+00 | 2.48 | 0.91 | P23193   | TCEA1    |
| 103.1  | Heat shock protein beta-1          | 1.51E+07 | 3.72E+07 | 2.47E+00 | 2.47E+00 | 2.47 | 0.90 | P04792   | HSPB1    |
| 1440.1 | Actin-related protein 2/3 compl    | 1.37E+04 | 3.37E+04 | 2.45E+00 | 2.45E+00 | 2.45 | 0.90 | O15143   | ARPC1B   |
| 323.1  | Peroxiredoxin-5, mitochondrial     | 1.93E+06 | 4.72E+06 | 2.44E+00 | 2.44E+00 | 2.44 | 0.89 | P30044   | PRDX5    |
| 2001.1 | Ran-specific GTPase-activating p   | 2.08E+05 | 5.09E+05 | 2.44E+00 | 2.44E+00 | 2.44 | 0.89 | F8WCY3   | RANBP1   |
| 424.1  | Leucine-rich repeat flightless-int | 5.61E+04 | 1.37E+05 | 2.44E+00 | 2.44E+00 | 2.44 | 0.89 | Q32MZ4   | LRRFIP1  |
| 220.1  | DNA replication licensing factor   | 2.01E+06 | 4.90E+06 | 2.44E+00 | 2.44E+00 | 2.44 | 0.89 | P33993   | MCM7     |
| 68.1   | Fructose-bisphosphate aldolase     | 8.85E+06 | 2.15E+07 | 2.43E+00 | 2.43E+00 | 2.43 | 0.89 | J3KPS3   | ALDOA    |

|        |                                     |          |          |          |          |      |      |          |          |
|--------|-------------------------------------|----------|----------|----------|----------|------|------|----------|----------|
| 324.1  | 26S protease regulatory subunit     | 7.14E+05 | 1.73E+06 | 2.42E+00 | 2.42E+00 | 2.42 | 0.89 | P62195   | PSMC5    |
| 42.1   | Selenium-binding protein 1          | 5.18E+06 | 1.25E+07 | 2.41E+00 | 2.41E+00 | 2.41 | 0.88 | Q13228   | SELENBP1 |
| 511.1  | Nicotinamide phosphoribosyltra      | 5.27E+05 | 1.27E+06 | 2.41E+00 | 2.41E+00 | 2.41 | 0.88 | P43490   | NAMPT    |
| 1324.1 | Histone-lysine N-methyltransfer     | 9.53E+04 | 2.29E+05 | 2.40E+00 | 2.40E+00 | 2.40 | 0.88 | Q8TEK3   | DOT1L    |
| 2411.1 | Isoform 3 of Oral-facial-digital sy | 1.79E+05 | 4.29E+05 | 2.40E+00 | 2.40E+00 | 2.40 | 0.87 | O75665-3 | OFD1     |
| 862.1  | Ubiquitin-like modifier-activatin   | 1.80E+05 | 4.30E+05 | 2.39E+00 | 2.39E+00 | 2.39 | 0.87 | Q9GZZ9   | UBA5     |
| 750.1  | Isoform 3 of Calcium-binding mi     | 1.25E+05 | 2.97E+05 | 2.37E+00 | 2.37E+00 | 2.37 | 0.86 | Q6KCM7-3 | SLC25A25 |
| 641.1  | Isoform 2 of Hematological and      | 1.25E+06 | 2.97E+06 | 2.37E+00 | 2.37E+00 | 2.37 | 0.86 | Q9UK76-2 | HN1      |
| 74.1   | Adenosylhomocysteinase              | 6.02E+06 | 1.40E+07 | 2.33E+00 | 2.33E+00 | 2.33 | 0.84 | P23526   | AHCY     |
| 27.1   | T-complex protein 1 subunit del     | 1.81E+07 | 4.17E+07 | 2.30E+00 | 2.30E+00 | 2.30 | 0.83 | P50991   | CCT4     |
| 58.2   | L-lactate dehydrogenase B chair     | 8.67E+06 | 1.98E+07 | 2.28E+00 | 2.28E+00 | 2.28 | 0.83 | P07195   | LDHB     |
| 13.1   | Pyruvate kinase isozymes M1/IV      | 4.47E+07 | 1.02E+08 | 2.28E+00 | 2.28E+00 | 2.28 | 0.83 | P14618   | PKM      |
| 43.1   | Elongation factor 2                 | 7.10E+06 | 1.61E+07 | 2.27E+00 | 2.27E+00 | 2.27 | 0.82 | P13639   | EEF2     |
| 493.1  | Macrophage migration inhibitor      | 2.40E+07 | 5.42E+07 | 2.26E+00 | 2.26E+00 | 2.26 | 0.82 | P14174   | MIF      |
| 532.1  | dCTP pyrophosphatase 1              | 5.99E+05 | 1.35E+06 | 2.26E+00 | 2.26E+00 | 2.26 | 0.81 | Q9H773   | DCTPP1   |
| 1254.1 | Tubby-related protein 1             | 1.85E+05 | 4.17E+05 | 2.25E+00 | 2.25E+00 | 2.25 | 0.81 | O00294   | TULP1    |
| 119.1  | Ubiquitin-like modifier-activatin   | 5.20E+06 | 1.17E+07 | 2.25E+00 | 2.25E+00 | 2.25 | 0.81 | P22314   | UBA1     |
| 391.1  | Thioredoxin domain-containing       | 9.35E+05 | 2.10E+06 | 2.25E+00 | 2.25E+00 | 2.25 | 0.81 | Q9BRA2   | TXNDC17  |
| 545.1  | GMP synthase [glutamine-hydr        | 4.38E+05 | 9.82E+05 | 2.24E+00 | 2.24E+00 | 2.24 | 0.81 | P49915   | GMPS     |
| 610.1  | Phosphoglucomutase-1                | 4.04E+05 | 9.07E+05 | 2.24E+00 | 2.24E+00 | 2.24 | 0.81 | P36871   | PGM1     |
| 58.1   | Isoform 3 of L-lactate dehydrog     | 6.02E+06 | 1.33E+07 | 2.21E+00 | 2.21E+00 | 2.21 | 0.79 | P00338-3 | LDHA     |
| 924.1  | Protein unc-119 homolog B           | 4.68E+04 | 1.03E+05 | 2.20E+00 | 2.20E+00 | 2.20 | 0.79 | A6NIH7   | UNC119B  |
| 147.1  | Eukaryotic translation initiation   | 3.80E+06 | 8.33E+06 | 2.19E+00 | 2.19E+00 | 2.19 | 0.78 | P41091   | EIF2S3   |
| 1321.1 | RNA-binding protein Raly            | 2.80E+05 | 6.05E+05 | 2.16E+00 | 2.16E+00 | 2.16 | 0.77 | Q9UKM9   | RALY     |
| 206.1  | Coatomer subunit beta               | 2.22E+06 | 4.74E+06 | 2.13E+00 | 2.13E+00 | 2.13 | 0.76 | P53618   | COPB1    |
| 754.1  | Splicing factor U2AF 65 kDa sub     | 7.63E+05 | 1.62E+06 | 2.12E+00 | 2.12E+00 | 2.12 | 0.75 | P26368   | U2AF2    |
| 1587.1 | Protein KIAA0368                    | 6.69E+04 | 1.42E+05 | 2.12E+00 | 2.12E+00 | 2.12 | 0.75 | J3KN16   | KIAA0368 |
| 933.1  | TBC1 domain family member 8         | 7.40E+04 | 1.56E+05 | 2.11E+00 | 2.11E+00 | 2.11 | 0.75 | J3KQ40   | TBC1D8   |
| 1631.1 | Melanoma-associated antigen D       | 1.34E+06 | 2.83E+06 | 2.10E+00 | 2.10E+00 | 2.10 | 0.74 | Q9UNF1   | MAGED2   |
| 345.1  | Proteasome subunit beta type-5      | 4.27E+05 | 8.97E+05 | 2.10E+00 | 2.10E+00 | 2.10 | 0.74 | P28074   | PSMB5    |
| 978.1  | ADP-ribosylation factor 5           | 1.39E+05 | 2.90E+05 | 2.09E+00 | 2.09E+00 | 2.09 | 0.74 | P84085   | ARF5     |
| 562.1  | High mobility group nucleosome      | 7.95E+05 | 1.66E+06 | 2.09E+00 | 2.09E+00 | 2.09 | 0.74 | P82970   | HMGN5    |
| 671.1  | Casein kinase II subunit alpha      | 2.58E+06 | 5.28E+06 | 2.05E+00 | 2.05E+00 | 2.05 | 0.72 | E7EU96   | CSNK2A1  |
| 2146.1 | E3 ubiquitin-protein ligase CHFR    | 5.72E+05 | 1.17E+06 | 2.04E+00 | 2.04E+00 | 2.04 | 0.72 | Q96EP1   | CHFR     |
| 609.1  | Isoform 2 of COP9 signalosome       | 2.00E+05 | 4.08E+05 | 2.04E+00 | 2.04E+00 | 2.04 | 0.71 | P61201-2 | COPS2    |

|        |                                   |          |          |          |          |      |      |          |            |
|--------|-----------------------------------|----------|----------|----------|----------|------|------|----------|------------|
| 127.1  | Translational activator GCN1      | 1.70E+06 | 3.46E+06 | 2.04E+00 | 2.04E+00 | 2.04 | 0.71 | Q92616   | GCN1L1     |
| 46.1   | Heterogeneous nuclear ribonuc     | 1.91E+07 | 3.88E+07 | 2.03E+00 | 2.03E+00 | 2.03 | 0.71 | P61978   | HNRNPK     |
| 273.1  | Mitochondrial import receptor s   | 3.38E+06 | 6.81E+06 | 2.02E+00 | 2.02E+00 | 2.02 | 0.70 | Q15785   | TOMM34     |
| 820.1  | Pro-cathepsin H                   | 1.59E+05 | 3.19E+05 | 2.01E+00 | 2.01E+00 | 2.01 | 0.70 | P09668   | CTSH       |
| 331.1  | Glutamate carboxypeptidase 2      | 1.37E+06 | 2.74E+06 | 1.99E+00 | 1.99E+00 | 1.99 | 0.69 | Q04609   | FOLH1      |
| 33.1   | Protein disulfide-isomerase A3    | 1.52E+07 | 3.00E+07 | 1.98E+00 | 1.98E+00 | 1.98 | 0.68 | P30101   | PDIA3      |
| 884.1  | Coatomer subunit epsilon          | 1.60E+06 | 3.15E+06 | 1.97E+00 | 1.97E+00 | 1.97 | 0.68 | O14579   | COPE       |
| 95.1   | DNA-(apurinic or apyrimidinic si  | 1.68E+07 | 3.30E+07 | 1.97E+00 | 1.97E+00 | 1.97 | 0.68 | P27695   | APEX1      |
| 383.1  | Histidine triad nucleotide-bindir | 4.17E+06 | 8.15E+06 | 1.96E+00 | 1.96E+00 | 1.96 | 0.67 | P49773   | HINT1      |
| 971.1  | Guanosine-3',5'-bis(diphosphate   | 4.79E+04 | 9.33E+04 | 1.95E+00 | 1.95E+00 | 1.95 | 0.67 | Q8N4P3   | HDDC3      |
| 868.1  | Protein Shroom3                   | 1.54E+05 | 2.99E+05 | 1.95E+00 | 1.95E+00 | 1.95 | 0.67 | Q8TF72   | SHROOM3    |
| 202.1  | Coatomer subunit beta'            | 1.17E+06 | 2.26E+06 | 1.93E+00 | 1.93E+00 | 1.93 | 0.66 | P35606   | COPB2      |
| 5.1    | Keratin, type I cytoskeletal 18   | 2.35E+08 | 4.52E+08 | 1.93E+00 | 1.93E+00 | 1.93 | 0.66 | P05783   | KRT18      |
| 972.1  | Pescadillo homolog                | 1.07E+05 | 2.06E+05 | 1.92E+00 | 1.92E+00 | 1.92 | 0.65 | B3KXD6   | PES1       |
| 567.1  | Protein NEDD8-MDP1                | 2.91E+05 | 5.59E+05 | 1.92E+00 | 1.92E+00 | 1.92 | 0.65 | E9PS38   | NEDD8-MDP1 |
| 26.1   | Cytoplasmic dynein 1 heavy cha    | 7.19E+06 | 1.38E+07 | 1.92E+00 | 1.92E+00 | 1.92 | 0.65 | Q14204   | DYNC1H1    |
| 749.1  | Midasin                           | 1.37E+05 | 2.63E+05 | 1.91E+00 | 1.91E+00 | 1.91 | 0.65 | Q9NU22   | MDN1       |
| 51.1   | Radixin                           | 8.82E+05 | 1.68E+06 | 1.91E+00 | 1.91E+00 | 1.91 | 0.64 | P35241   | RDX        |
| 75.1   | Cytosolic non-specific dipeptida  | 2.58E+06 | 4.91E+06 | 1.90E+00 | 1.90E+00 | 1.90 | 0.64 | Q96KP4   | CNDP2      |
| 217.1  | Bifunctional purine biosynthesis  | 3.89E+06 | 7.38E+06 | 1.90E+00 | 1.90E+00 | 1.90 | 0.64 | P31939   | ATIC       |
| 325.1  | Phosphatidylethanolamine-bind     | 2.27E+06 | 4.27E+06 | 1.88E+00 | 1.88E+00 | 1.88 | 0.63 | P30086   | PEBP1      |
| 9.2    | Tubulin beta chain                | 1.10E+07 | 2.06E+07 | 1.87E+00 | 1.87E+00 | 1.87 | 0.63 | P07437   | TUBB       |
| 1461.1 | Isoform 2 of Kinesin-like protein | 1.09E+05 | 2.04E+05 | 1.87E+00 | 1.87E+00 | 1.87 | 0.63 | Q12756-2 | KIF1A      |
| 925.1  | Isoform 2 of Melanoma-associat    | 1.00E+06 | 1.87E+06 | 1.86E+00 | 1.86E+00 | 1.86 | 0.62 | Q8TD91-2 | MAGEC3     |
| 177.1  | Signal recognition particle 14 kD | 1.23E+07 | 2.29E+07 | 1.86E+00 | 1.86E+00 | 1.86 | 0.62 | P37108   | SRP14      |
| 711.1  | Adenosine kinase                  | 1.66E+06 | 3.05E+06 | 1.84E+00 | 1.84E+00 | 1.84 | 0.61 | P55263   | ADK        |
| 248.1  | Serine/threonine-protein phosp    | 8.70E+05 | 1.59E+06 | 1.83E+00 | 1.83E+00 | 1.83 | 0.60 | P30153   | PPP2R1A    |
| 402.1  | 26S proteasome non-ATPase re      | 1.03E+06 | 1.87E+06 | 1.81E+00 | 1.81E+00 | 1.81 | 0.60 | O43242   | PSMD3      |
| 990.1  | Programmed cell death protein     | 2.89E+04 | 5.19E+04 | 1.79E+00 | 1.79E+00 | 1.79 | 0.58 | Q9BRP1   | PDCD2L     |
| 979.1  | Talin-2                           | 1.33E+04 | 2.38E+04 | 1.78E+00 | 1.78E+00 | 1.78 | 0.58 | Q9Y4G6   | TLN2       |
| 449.1  | N-alpha-acetyltransferase 15, N   | 1.65E+05 | 2.90E+05 | 1.76E+00 | 1.76E+00 | 1.76 | 0.57 | Q9BXJ9   | NAA15      |
| 1038.1 | Ras-like protein family member    | 3.44E+06 | 6.04E+06 | 1.76E+00 | 1.76E+00 | 1.76 | 0.56 | Q6T310   | RASL11A    |
| 748.1  | Alpha-endosulfine                 | 2.58E+05 | 4.51E+05 | 1.75E+00 | 1.75E+00 | 1.75 | 0.56 | Q5T5H1   | ENSA       |
| 566.1  | Diacylglycerol kinase zeta        | 1.10E+06 | 1.92E+06 | 1.74E+00 | 1.74E+00 | 1.74 | 0.56 | F5H033   | DGKZ       |
| 914.1  | Hepatoma-derived growth factc     | 9.64E+04 | 1.67E+05 | 1.73E+00 | 1.73E+00 | 1.73 | 0.55 | Q7Z4V5   | HDGFRP2    |



|        |                                   |          |          |          |          |      |      |          |           |
|--------|-----------------------------------|----------|----------|----------|----------|------|------|----------|-----------|
| 631.1  | Prostaglandin E synthase 3        | 1.73E+05 | 2.99E+05 | 1.73E+00 | 1.73E+00 | 1.73 | 0.55 | Q15185   | PTGES3    |
| 604.1  | Isoform 3 of Chitinase domain-c   | 2.94E+06 | 5.07E+06 | 1.72E+00 | 1.72E+00 | 1.72 | 0.54 | Q9BWS9-3 | CHID1     |
| 698.1  | Isoform 2 of Glycogen synthase    | 8.70E+05 | 1.50E+06 | 1.72E+00 | 1.72E+00 | 1.72 | 0.54 | P49841-2 | GSK3B     |
| 805.1  | Transcription factor BTF3 homo    | 3.56E+05 | 6.13E+05 | 1.72E+00 | 1.72E+00 | 1.72 | 0.54 | Q96K17   | BTF3L4    |
| 776.1  | Vinculin                          | 3.46E+05 | 5.93E+05 | 1.72E+00 | 1.72E+00 | 1.72 | 0.54 | P18206   | VCL       |
| 747.1  | Proteasome subunit beta type-7    | 4.50E+05 | 7.69E+05 | 1.71E+00 | 1.71E+00 | 1.71 | 0.54 | Q99436   | PSMB7     |
| 1143.1 | Alpha-galactosidase A             | 1.13E+05 | 1.93E+05 | 1.70E+00 | 1.70E+00 | 1.70 | 0.53 | P06280   | GLA       |
| 1107.1 | Integrator complex subunit 12     | 2.00E+05 | 3.41E+05 | 1.70E+00 | 1.70E+00 | 1.70 | 0.53 | Q96CB8   | INTS12    |
| 218.1  | Serum albumin                     | 2.09E+07 | 3.56E+07 | 1.70E+00 | 1.70E+00 | 1.70 | 0.53 | P02768   | ALB       |
| 471.1  | Translationally-controlled tumo   | 8.36E+05 | 1.42E+06 | 1.70E+00 | 1.70E+00 | 1.70 | 0.53 | Q5W0H4   | TPT1      |
| 681.1  | Trafficking protein particle com  | 1.81E+05 | 3.00E+05 | 1.66E+00 | 1.66E+00 | 1.66 | 0.51 | O43617   | TRAPPC3   |
| 28.2   | Isocitrate dehydrogenase [NADP    | 2.90E+06 | 4.75E+06 | 1.64E+00 | 1.64E+00 | 1.64 | 0.49 | O75874   | IDH1      |
| 1242.1 | Protein cTAGE-2                   | 4.75E+05 | 7.73E+05 | 1.63E+00 | 1.63E+00 | 1.63 | 0.49 | Q96RT6   | CTAGE1    |
| 92.1   | Transaldolase                     | 5.42E+06 | 8.80E+06 | 1.62E+00 | 1.62E+00 | 1.62 | 0.48 | P37837   | TALDO1    |
| 1284.1 | Rho GTPase-activating protein 1   | 4.30E+05 | 6.78E+05 | 1.58E+00 | 1.58E+00 | 1.58 | 0.46 | Q6P4F7   | ARHGAP11A |
| 253.1  | Protein transport protein Sec24   | 3.89E+06 | 6.11E+06 | 1.57E+00 | 1.57E+00 | 1.57 | 0.45 | P53992   | SEC24C    |
| 88.4   | 14-3-3 protein theta              | 3.32E+05 | 5.20E+05 | 1.57E+00 | 1.57E+00 | 1.57 | 0.45 | P27348   | YWHAQ     |
| 716.1  | S-formylglutathione hydrolase     | 2.96E+06 | 4.64E+06 | 1.57E+00 | 1.57E+00 | 1.57 | 0.45 | P10768   | ESD       |
| 533.1  | Vesicle-fusing ATPase             | 1.51E+06 | 2.35E+06 | 1.56E+00 | 1.56E+00 | 1.56 | 0.44 | P46459   | NSF       |
| 888.1  | Peptidyl-prolyl cis-trans isomera | 3.92E+04 | 6.11E+04 | 1.56E+00 | 1.56E+00 | 1.56 | 0.44 | Q9Y3C6   | PPIL1     |
| 38.1   | Putative elongation factor 1-alp  | 3.46E+06 | 5.38E+06 | 1.56E+00 | 1.56E+00 | 1.56 | 0.44 | Q5VTE0   | EEF1A1P5  |
| 40.1   | T-complex protein 1 subunit gar   | 1.08E+07 | 1.68E+07 | 1.55E+00 | 1.55E+00 | 1.55 | 0.44 | P49368   | CCT3      |
| 608.1  | Replication protein A 70 kDa DN   | 2.70E+05 | 4.16E+05 | 1.54E+00 | 1.54E+00 | 1.54 | 0.43 | P27694   | RPA1      |
| 286.1  | Eukaryotic translation initiation | 6.64E+06 | 1.02E+07 | 1.54E+00 | 1.54E+00 | 1.54 | 0.43 | I3L504   | EIF5A     |
| 303.1  | WD repeat-containing protein 1    | 2.08E+06 | 3.16E+06 | 1.52E+00 | 1.52E+00 | 1.52 | 0.42 | O75083   | WDR1      |
| 20.2   | Heat shock protein HSP 90-beta    | 1.64E+07 | 2.47E+07 | 1.51E+00 | 1.51E+00 | 1.51 | 0.41 | P08238   | HSP90AB1  |
| 477.1  | Eukaryotic peptide chain release  | 8.02E+05 | 1.20E+06 | 1.50E+00 | 1.50E+00 | 1.50 | 0.40 | P15170   | GSPT1     |
| 1554.1 | Isoform 3 of PR domain zinc fing  | 9.27E+04 | 1.38E+05 | 1.49E+00 | 1.49E+00 | 1.49 | 0.40 | Q9HAZ2-3 | PRDM16    |
| 433.1  | Coatomer subunit gamma-2          | 1.23E+06 | 1.83E+06 | 1.48E+00 | 1.48E+00 | 1.48 | 0.39 | Q9UBF2   | COPG2     |
| 1530.1 | Zinc finger and BTB domain-con    | 1.56E+05 | 2.28E+05 | 1.46E+00 | 1.46E+00 | 1.46 | 0.38 | O95625   | ZBTB11    |
| 1155.1 | Microtubule-associated protein    | 1.22E+05 | 1.79E+05 | 1.46E+00 | 1.46E+00 | 1.46 | 0.38 | Q66K74   | MAP1S     |
| 969.1  | Protein transport protein Sec31   | 3.16E+05 | 4.63E+05 | 1.46E+00 | 1.46E+00 | 1.46 | 0.38 | Q9NQW1   | SEC31B    |
| 221.1  | Calmodulin                        | 8.89E+06 | 1.30E+07 | 1.46E+00 | 1.46E+00 | 1.46 | 0.38 | E7EMB3   | CALM2     |
| 157.1  | Ankyrin-3                         | 4.77E+06 | 6.95E+06 | 1.46E+00 | 1.46E+00 | 1.46 | 0.38 | Q12955   | ANK3      |
| 123.1  | T-complex protein 1 subunit eta   | 6.95E+06 | 1.01E+07 | 1.45E+00 | 1.45E+00 | 1.45 | 0.37 | Q99832   | CCT7      |

|        |                                             |          |          |          |          |      |      |          |         |
|--------|---------------------------------------------|----------|----------|----------|----------|------|------|----------|---------|
| 520.1  | Farnesyl pyrophosphate synthase             | 1.51E+05 | 2.18E+05 | 1.45E+00 | 1.45E+00 | 1.45 | 0.37 | P14324   | FDPS    |
| 8.1    | Heat shock cognate 71 kDa protein           | 1.09E+08 | 1.58E+08 | 1.45E+00 | 1.45E+00 | 1.45 | 0.37 | P11142   | HSPA8   |
| 374.1  | Coatamer subunit zeta-1                     | 1.28E+06 | 1.85E+06 | 1.44E+00 | 1.44E+00 | 1.44 | 0.37 | F8VVA7   | COPZ1   |
| 1287.1 | Zinc finger ZZ-type and EF-hand domain      | 2.10E+05 | 3.02E+05 | 1.44E+00 | 1.44E+00 | 1.44 | 0.36 | O43149   | ZZEF1   |
| 679.1  | UMP-CMP kinase                              | 1.25E+06 | 1.80E+06 | 1.44E+00 | 1.44E+00 | 1.44 | 0.36 | P30085   | CMPK1   |
| 3.1    | Keratin, type II cytoskeletal 8             | 5.01E+08 | 7.18E+08 | 1.43E+00 | 1.43E+00 | 1.43 | 0.36 | P05787   | KRT8    |
| 677.1  | Keratin, type II cuticular Hb1              | 3.31E+05 | 4.72E+05 | 1.43E+00 | 1.43E+00 | 1.43 | 0.36 | Q14533   | KRT81   |
| 88.2   | 14-3-3 protein beta/alpha                   | 1.16E+06 | 1.65E+06 | 1.42E+00 | 1.42E+00 | 1.42 | 0.35 | P31946   | YWHAB   |
| 368.1  | Lipopolysaccharide-responsive protein       | 1.04E+06 | 1.46E+06 | 1.40E+00 | 1.40E+00 | 1.40 | 0.34 | F5H1X8   | LRBA    |
| 116.1  | Matrin-3                                    | 5.49E+06 | 7.57E+06 | 1.38E+00 | 1.38E+00 | 1.38 | 0.32 | A8MXP9   | MATR3   |
| 2722.1 | Inhibitor of nuclear factor kappa-B kinase  | 4.91E+05 | 6.77E+05 | 1.38E+00 | 1.38E+00 | 1.38 | 0.32 | O14920   | IKBKB   |
| 276.1  | Protein SET                                 | 1.61E+07 | 2.20E+07 | 1.37E+00 | 1.37E+00 | 1.37 | 0.31 | Q01105   | SET     |
| 20.3   | Endoplasmic reticulum chaperone             | 1.32E+07 | 1.81E+07 | 1.37E+00 | 1.37E+00 | 1.37 | 0.31 | P14625   | HSP90B1 |
| 25.1   | Fatty acid synthase                         | 1.14E+07 | 1.56E+07 | 1.37E+00 | 1.37E+00 | 1.37 | 0.31 | P49327   | FASN    |
| 30.1   | Triosephosphate isomerase                   | 3.32E+07 | 4.52E+07 | 1.36E+00 | 1.36E+00 | 1.36 | 0.31 | P60174   | TPI1    |
| 1445.1 | FERM domain-containing protein              | 1.96E+05 | 2.67E+05 | 1.36E+00 | 1.36E+00 | 1.36 | 0.31 | Q9Y2L6   | FRMD4B  |
| 197.1  | RuvB-like 2                                 | 1.58E+06 | 2.14E+06 | 1.36E+00 | 1.36E+00 | 1.36 | 0.31 | Q9Y230   | RUVBL2  |
| 24.2   | Tubulin alpha-4A chain                      | 2.07E+06 | 2.80E+06 | 1.35E+00 | 1.35E+00 | 1.35 | 0.30 | P68366   | TUBA4A  |
| 949.1  | KIAA0423, isoform CRA_a                     | 1.43E+06 | 1.92E+06 | 1.35E+00 | 1.35E+00 | 1.35 | 0.30 | G3XAE9   | FAM179B |
| 505.1  | 26S protease regulatory subunit             | 6.24E+05 | 8.38E+05 | 1.34E+00 | 1.34E+00 | 1.34 | 0.30 | P62333   | PSMC6   |
| 53.1   | T-complex protein 1 subunit zeta            | 1.40E+07 | 1.84E+07 | 1.32E+00 | 1.32E+00 | 1.32 | 0.28 | P40227   | CCT6A   |
| 38.2   | Elongation factor 1-alpha 2                 | 2.86E+06 | 3.76E+06 | 1.31E+00 | 1.31E+00 | 1.31 | 0.27 | Q05639   | EEF1A2  |
| 701.1  | Xin actin-binding repeat-containing protein | 1.35E+05 | 1.78E+05 | 1.31E+00 | 1.31E+00 | 1.31 | 0.27 | J3KNB1   | XIRP2   |
| 62.1   | Peptidyl-prolyl cis-trans isomerase         | 9.59E+07 | 1.26E+08 | 1.31E+00 | 1.31E+00 | 1.31 | 0.27 | P62937   | PPIA    |
| 183.1  | Phosphoserine aminotransferase              | 2.40E+06 | 3.14E+06 | 1.31E+00 | 1.31E+00 | 1.31 | 0.27 | Q9Y617   | PSAT1   |
| 80.1   | Transcription intermediary factor 1         | 1.16E+07 | 1.52E+07 | 1.31E+00 | 1.31E+00 | 1.31 | 0.27 | Q13263   | TRIM28  |
| 255.1  | Coatamer subunit gamma-1                    | 2.29E+06 | 3.00E+06 | 1.31E+00 | 1.31E+00 | 1.31 | 0.27 | Q9Y678   | COPG1   |
| 571.1  | Symplekin                                   | 3.80E+05 | 4.96E+05 | 1.30E+00 | 1.30E+00 | 1.30 | 0.27 | Q92797   | SYMPK   |
| 508.1  | DnaJ homolog subfamily C member             | 2.08E+06 | 2.68E+06 | 1.29E+00 | 1.29E+00 | 1.29 | 0.25 | O75937   | DNAJC8  |
| 823.1  | Isoform Long of Ubiquitin fusion            | 4.00E+05 | 5.13E+05 | 1.28E+00 | 1.28E+00 | 1.28 | 0.25 | Q92890-1 | UFD1L   |
| 760.1  | Protein FAM50A                              | 1.39E+05 | 1.72E+05 | 1.24E+00 | 1.24E+00 | 1.24 | 0.22 | Q14320   | FAM50A  |
| 70.1   | Alanine--tRNA ligase, cytoplasmic           | 4.25E+06 | 5.25E+06 | 1.24E+00 | 1.24E+00 | 1.24 | 0.21 | P49588   | AARS    |
| 1045.1 | Isoform 3 of LIM and calponin h             | 4.55E+04 | 5.61E+04 | 1.23E+00 | 1.23E+00 | 1.23 | 0.21 | Q9UPQ0-3 | LIMCH1  |
| 81.1   | Isoform 2 of Glucose-6-phosphatase          | 1.45E+07 | 1.77E+07 | 1.22E+00 | 1.22E+00 | 1.22 | 0.20 | P06744-2 | GPI     |
| 181.1  | Isoform 2 of Multifunctional protein        | 5.42E+06 | 6.56E+06 | 1.21E+00 | 1.21E+00 | 1.21 | 0.19 | P22234-2 | PAICS   |

|        |                                  |          |          |          |          |      |      |          |          |
|--------|----------------------------------|----------|----------|----------|----------|------|------|----------|----------|
| 612.1  | Pterin-4-alpha-carbinolamine de  | 7.38E+05 | 8.88E+05 | 1.20E+00 | 1.20E+00 | 1.20 | 0.18 | P61457   | PCBD1    |
| 120.1  | Profilin-1                       | 1.77E+07 | 2.12E+07 | 1.20E+00 | 1.20E+00 | 1.20 | 0.18 | P07737   | PFN1     |
| 498.1  | Activator of 90 kDa heat shock p | 8.22E+05 | 9.76E+05 | 1.19E+00 | 1.19E+00 | 1.19 | 0.17 | O95433   | AHSA1    |
| 930.1  | Glycine dehydrogenase [decarb    | 1.59E+05 | 1.88E+05 | 1.18E+00 | 1.18E+00 | 1.18 | 0.17 | P23378   | GLDC     |
| 635.1  | Myosin regulatory light chain 12 | 1.60E+06 | 1.89E+06 | 1.18E+00 | 1.18E+00 | 1.18 | 0.17 | J3QRS3   | MYL12A   |
| 49.1   | T-complex protein 1 subunit eps  | 2.00E+07 | 2.36E+07 | 1.18E+00 | 1.18E+00 | 1.18 | 0.16 | P48643   | CCT5     |
| 815.1  | E3 ubiquitin-protein ligase SMU  | 1.72E+05 | 2.02E+05 | 1.18E+00 | 1.18E+00 | 1.18 | 0.16 | Q9HCE7   | SMURF1   |
| 67.1   | Protein disulfide-isomerase      | 9.76E+06 | 1.14E+07 | 1.17E+00 | 1.17E+00 | 1.17 | 0.16 | P07237   | P4HB     |
| 1301.1 | Glycogen [starch] synthase, mus  | 7.04E+04 | 8.09E+04 | 1.15E+00 | 1.15E+00 | 1.15 | 0.14 | P13807   | GYS1     |
| 195.1  | Hepatoma-derived growth factc    | 7.98E+06 | 9.16E+06 | 1.15E+00 | 1.15E+00 | 1.15 | 0.14 | P51858   | HDGF     |
| 85.1   | 14-3-3 protein epsilon           | 3.29E+07 | 3.77E+07 | 1.15E+00 | 1.15E+00 | 1.15 | 0.14 | P62258   | YWHAE    |
| 726.1  | Signal transducer and activator  | 8.35E+05 | 9.58E+05 | 1.15E+00 | 1.15E+00 | 1.15 | 0.14 | P40763   | STAT3    |
| 489.1  | Proteasome subunit alpha type-   | 1.42E+06 | 1.62E+06 | 1.14E+00 | 1.14E+00 | 1.14 | 0.14 | P25789   | PSMA4    |
| 199.1  | Isoform 2 of DBIRD complex sub   | 3.53E+06 | 4.01E+06 | 1.14E+00 | 1.14E+00 | 1.14 | 0.13 | Q8N163-2 | KIAA1967 |
| 91.1   | Asparagine--tRNA ligase, cytopl  | 9.24E+06 | 1.05E+07 | 1.14E+00 | 1.14E+00 | 1.14 | 0.13 | O43776   | NARS     |
| 230.1  | Splicing factor 3B subunit 2     | 3.60E+06 | 4.07E+06 | 1.13E+00 | 1.13E+00 | 1.13 | 0.12 | Q13435   | SF3B2    |
| 626.1  | Capping protein (Actin filament) | 3.70E+05 | 4.15E+05 | 1.12E+00 | 1.12E+00 | 1.12 | 0.11 | B1AK88   | CAPZB    |
| 339.1  | DNA replication licensing factor | 1.05E+06 | 1.17E+06 | 1.11E+00 | 1.11E+00 | 1.11 | 0.11 | P33991   | MCM4     |
| 59.1   | Isoform 2 of Neutral alpha-gluc  | 1.46E+07 | 1.60E+07 | 1.10E+00 | 1.10E+00 | 1.10 | 0.09 | Q14697-2 | GANAB    |
| 296.1  | Programmed cell death protein    | 3.11E+06 | 3.42E+06 | 1.10E+00 | 1.10E+00 | 1.10 | 0.09 | O14737   | PDCD5    |
| 738.1  | Transcription elongation factor  | 1.92E+05 | 2.10E+05 | 1.09E+00 | 1.09E+00 | 1.09 | 0.09 | Q5H9L2   | TCEAL5   |
| 270.1  | Isoform 2 of AP-1 complex subu   | 7.26E+05 | 7.85E+05 | 1.08E+00 | 1.08E+00 | 1.08 | 0.08 | Q9Y6Q5-2 | AP1M2    |
| 1075.1 | Serine/threonine-protein kinase  | 8.00E+04 | 8.63E+04 | 1.08E+00 | 1.08E+00 | 1.08 | 0.08 | I3L0C1   | SMG1     |
| 258.1  | 14-3-3 protein eta               | 9.22E+06 | 9.91E+06 | 1.07E+00 | 1.07E+00 | 1.07 | 0.07 | Q04917   | YWHAH    |
| 822.1  | Kinesin-like protein KIF7        | 2.75E+05 | 2.93E+05 | 1.07E+00 | 1.07E+00 | 1.07 | 0.06 | Q2M1P5   | KIF7     |
| 519.1  | 26S proteasome non-ATPase re     | 1.86E+06 | 1.98E+06 | 1.06E+00 | 1.06E+00 | 1.06 | 0.06 | C9IZE4   | PSMD6    |
| 312.1  | 14-3-3 protein sigma             | 9.00E+06 | 9.57E+06 | 1.06E+00 | 1.06E+00 | 1.06 | 0.06 | P31947   | SFN      |
| 78.1   | Creatine kinase B-type           | 3.33E+07 | 3.52E+07 | 1.06E+00 | 1.06E+00 | 1.06 | 0.06 | P12277   | CKB      |
| 443.1  | E3 ubiquitin-protein ligase HUW  | 8.39E+05 | 8.82E+05 | 1.05E+00 | 1.05E+00 | 1.05 | 0.05 | Q7Z6Z7   | HUWE1    |
| 1198.1 | Isoform 7 of Granulocyte-macro   | 2.36E+05 | 2.47E+05 | 1.05E+00 | 1.05E+00 | 1.05 | 0.05 | P15509-7 | CSF2RA   |
| 322.1  | Calreticulin                     | 2.00E+06 | 2.09E+06 | 1.04E+00 | 1.04E+00 | 1.04 | 0.04 | P27797   | CALR     |
| 655.1  | Selenocysteine lyase             | 3.72E+05 | 3.88E+05 | 1.04E+00 | 1.04E+00 | 1.04 | 0.04 | Q96I15   | SCLY     |
| 167.1  | 26S proteasome non-ATPase re     | 5.42E+06 | 5.57E+06 | 1.03E+00 | 1.03E+00 | 1.03 | 0.03 | Q5VWC4   | PSMD4    |
| 4.1    | Isoform 4 of Acetyl-CoA carboxy  | 4.50E+07 | 4.60E+07 | 1.02E+00 | 1.02E+00 | 1.02 | 0.02 | Q13085-4 | ACACA    |
| 616.1  | Sister chromatid cohesion prote  | 4.29E+05 | 4.38E+05 | 1.02E+00 | 1.02E+00 | 1.02 | 0.02 | Q9NTI5   | PDS5B    |

|        |                                                        |          |          |          |           |       |       |          |          |
|--------|--------------------------------------------------------|----------|----------|----------|-----------|-------|-------|----------|----------|
| 37.1   | Cullin-associated NEDD8-dissociation factor 1          | 8.80E+06 | 8.96E+06 | 1.02E+00 | 1.02E+00  | 1.02  | 0.02  | Q86VP6   | CAND1    |
| 109.1  | Hypoxia up-regulated protein 1                         | 8.33E+06 | 8.43E+06 | 1.01E+00 | 1.01E+00  | 1.01  | 0.01  | Q9Y4L1   | HYOU1    |
| 1812.1 | Serine protease 23                                     | 1.24E+05 | 1.25E+05 | 1.01E+00 | 1.01E+00  | 1.01  | 0.01  | O95084   | PRSS23   |
| 852.1  | SUMO-activating enzyme subunit 1                       | 2.38E+05 | 2.38E+05 | 1.00E+00 | 1.00E+00  | 1.00  | 0.00  | Q9UBE0   | SAE1     |
| 527.1  | Isoform 2 of 26S proteasome non-ATPase subunit alpha 1 | 1.06E+06 | 1.06E+06 | 9.99E-01 | -1.00E+00 | -1.00 | 0.00  | O00231-2 | PSMD11   |
| 338.1  | Protein S100-A11                                       | 3.21E+06 | 3.21E+06 | 9.98E-01 | -1.00E+00 | -1.00 | 0.00  | P31949   | S100A11  |
| 577.1  | NAD(P)H-hydrate epimerase                              | 3.58E+05 | 3.56E+05 | 9.95E-01 | -1.01E+00 | -1.01 | -0.01 | Q8NCW5   | APOA1BP  |
| 431.1  | NEDD8-conjugating enzyme Ubc1A                         | 6.74E+05 | 6.64E+05 | 9.85E-01 | -1.02E+00 | -1.02 | -0.02 | P61081   | UBE2M    |
| 118.1  | Neuroblast differentiation-associated protein 1        | 3.72E+06 | 3.66E+06 | 9.84E-01 | -1.02E+00 | -1.02 | -0.02 | Q09666   | AHNAK    |
| 372.1  | Nucleosome assembly protein 1                          | 2.61E+06 | 2.52E+06 | 9.66E-01 | -1.04E+00 | -1.04 | -0.03 | P55209   | NAP1L1   |
| 141.1  | Cofilin-1                                              | 1.48E+07 | 1.41E+07 | 9.55E-01 | -1.05E+00 | -1.05 | -0.05 | E9PK25   | CFL1     |
| 50.2   | Isoform 2 of Eukaryotic initiation factor 4E           | 1.16E+06 | 1.11E+06 | 9.55E-01 | -1.05E+00 | -1.05 | -0.05 | Q14240-2 | EIF4A2   |
| 247.1  | 4-trimethylaminobutyraldehyde dehydrogenase            | 5.01E+06 | 4.78E+06 | 9.53E-01 | -1.05E+00 | -1.05 | -0.05 | P49189   | ALDH9A1  |
| 728.1  | Platelet-activating factor acetyltransferase 1         | 3.87E+05 | 3.68E+05 | 9.50E-01 | -1.05E+00 | -1.05 | -0.05 | Q15102   | PAFAH1B3 |
| 557.1  | Proteasome subunit alpha type-1                        | 9.22E+05 | 8.74E+05 | 9.48E-01 | -1.05E+00 | -1.05 | -0.05 | P28066   | PSMA5    |
| 182.1  | Carbonyl reductase [NADPH] 1                           | 5.38E+06 | 5.09E+06 | 9.46E-01 | -1.06E+00 | -1.06 | -0.06 | P16152   | CBR1     |
| 435.1  | Androgen receptor                                      | 1.11E+06 | 1.05E+06 | 9.44E-01 | -1.06E+00 | -1.06 | -0.06 | P10275   | AR       |
| 1079.1 | Leucine-rich repeat-containing protein 1               | 1.45E+05 | 1.35E+05 | 9.34E-01 | -1.07E+00 | -1.07 | -0.07 | Q9H9A6   | LRRC40   |
| 269.1  | Protein disulfide-isomerase A4                         | 1.02E+06 | 9.51E+05 | 9.31E-01 | -1.07E+00 | -1.07 | -0.07 | P13667   | PDIA4    |
| 584.1  | Isoform 3 of NADPH:adrenodoxin oxidoreductase          | 1.14E+05 | 1.06E+05 | 9.28E-01 | -1.08E+00 | -1.08 | -0.07 | P22570-3 | FDXR     |
| 8.3    | Heat shock 70 kDa protein 1A/1                         | 6.59E+05 | 6.10E+05 | 9.25E-01 | -1.08E+00 | -1.08 | -0.08 | P08107   | HSPA1A   |
| 607.1  | Dynein light chain 1, cytoplasmic                      | 1.58E+06 | 1.45E+06 | 9.19E-01 | -1.09E+00 | -1.09 | -0.08 | P63167   | DYNLL1   |
| 1237.1 | WASH complex subunit 7                                 | 3.93E+03 | 3.60E+03 | 9.15E-01 | -1.09E+00 | -1.09 | -0.09 | Q2M389   | KIAA1033 |
| 1088.1 | Drebrin-like protein                                   | 2.08E+04 | 1.90E+04 | 9.12E-01 | -1.10E+00 | -1.10 | -0.09 | Q9UJU6   | DBNL     |
| 332.1  | cAMP-dependent protein kinase alpha                    | 5.77E+05 | 5.26E+05 | 9.11E-01 | -1.10E+00 | -1.10 | -0.09 | P13861   | PRKAR2A  |
| 76.3   | Heterogeneous nuclear ribonucleoprotein A1             | 7.07E+06 | 6.42E+06 | 9.08E-01 | -1.10E+00 | -1.10 | -0.10 | P52597   | HNRNPF   |
| 32.1   | T-complex protein 1 subunit beta                       | 3.08E+07 | 2.76E+07 | 8.95E-01 | -1.12E+00 | -1.12 | -0.11 | P78371   | CCT2     |
| 8.2    | 78 kDa glucose-regulated protein                       | 2.19E+07 | 1.96E+07 | 8.93E-01 | -1.12E+00 | -1.12 | -0.11 | P11021   | HSPA5    |
| 1178.1 | ATP synthase subunit b, mitochondrial                  | 6.39E+05 | 5.70E+05 | 8.92E-01 | -1.12E+00 | -1.12 | -0.11 | P24539   | ATP5F1   |
| 460.1  | Tumor susceptibility gene 101 protein                  | 1.94E+06 | 1.72E+06 | 8.86E-01 | -1.13E+00 | -1.13 | -0.12 | Q99816   | TSG101   |
| 365.1  | Thioredoxin domain-containing protein 1                | 1.03E+06 | 9.13E+05 | 8.85E-01 | -1.13E+00 | -1.13 | -0.12 | Q8NBS9   | TXNDC5   |
| 414.1  | Phosphoribosyl pyrophosphate synthetase 1              | 9.55E+05 | 8.43E+05 | 8.82E-01 | -1.13E+00 | -1.13 | -0.13 | O60256   | PRPSAP2  |
| 224.1  | Protein DJ-1                                           | 7.34E+06 | 6.44E+06 | 8.77E-01 | -1.14E+00 | -1.14 | -0.13 | Q99497   | PARK7    |
| 496.1  | NSFL1 cofactor p47                                     | 3.70E+05 | 3.24E+05 | 8.76E-01 | -1.14E+00 | -1.14 | -0.13 | J3QK90   | NSFL1C   |
| 262.1  | Sialic acid synthase                                   | 8.98E+06 | 7.86E+06 | 8.76E-01 | -1.14E+00 | -1.14 | -0.13 | Q9NR45   | NANS     |

|        |                                   |          |          |          |           |       |       |          |          |
|--------|-----------------------------------|----------|----------|----------|-----------|-------|-------|----------|----------|
| 35.1   | Phosphoglycerate kinase 1         | 4.73E+07 | 4.14E+07 | 8.75E-01 | -1.14E+00 | -1.14 | -0.13 | P00558   | PGK1     |
| 271.1  | Parathyrosin                      | 1.61E+07 | 1.38E+07 | 8.58E-01 | -1.16E+00 | -1.16 | -0.15 | P20962   | PTMS     |
| 1450.1 | TBC1 domain family member 9       | 1.28E+05 | 1.09E+05 | 8.49E-01 | -1.18E+00 | -1.18 | -0.16 | Q6ZT07   | TBC1D9   |
| 583.1  | UPF0468 protein C16orf80          | 2.80E+04 | 2.35E+04 | 8.39E-01 | -1.19E+00 | -1.19 | -0.18 | Q9Y6A4   | C16orf80 |
| 492.1  | Dynactin subunit 1                | 1.49E+06 | 1.22E+06 | 8.21E-01 | -1.22E+00 | -1.22 | -0.20 | Q14203   | DCTN1    |
| 907.1  | DNA topoisomerase I, mitochon     | 6.39E+05 | 5.22E+05 | 8.17E-01 | -1.22E+00 | -1.22 | -0.20 | Q969P6   | TOP1MT   |
| 2111.1 | Flavin reductase (NADPH)          | 4.07E+04 | 3.29E+04 | 8.08E-01 | -1.24E+00 | -1.24 | -0.21 | P30043   | BLVRB    |
| 20.1   | Isoform 2 of Heat shock protein   | 3.47E+07 | 2.76E+07 | 7.96E-01 | -1.26E+00 | -1.26 | -0.23 | P07900-2 | HSP90AA1 |
| 540.1  | RNA-binding protein 12            | 3.39E+05 | 2.68E+05 | 7.91E-01 | -1.26E+00 | -1.26 | -0.23 | Q9NTZ6   | RBM12    |
| 633.1  | Isoform 2 of Histone H2A.J        | 1.07E+06 | 8.46E+05 | 7.89E-01 | -1.27E+00 | -1.27 | -0.24 | Q9BTM1-2 | H2AFJ    |
| 401.1  | Isoform 2 of Casein kinase I isof | 1.25E+06 | 9.87E+05 | 7.87E-01 | -1.27E+00 | -1.27 | -0.24 | P48729-2 | CSNK1A1  |
| 146.1  | Isoform 2 of Programmed cell d    | 4.07E+06 | 3.20E+06 | 7.85E-01 | -1.27E+00 | -1.27 | -0.24 | Q8WUM4-  | PDCD6IP  |
| 723.1  | 60S ribosomal protein L39         | 6.43E+06 | 5.05E+06 | 7.85E-01 | -1.27E+00 | -1.27 | -0.24 | P62891   | RPL39    |
| 1015.1 | Engulfment and cell motility pro  | 9.07E+05 | 7.10E+05 | 7.83E-01 | -1.28E+00 | -1.28 | -0.24 | Q92556   | ELMO1    |
| 692.1  | HEAT repeat-containing protein    | 2.45E+05 | 1.91E+05 | 7.81E-01 | -1.28E+00 | -1.28 | -0.25 | Q9P2D3   | HEATR5B  |
| 811.1  | Ran-binding protein 3             | 4.51E+05 | 3.50E+05 | 7.76E-01 | -1.29E+00 | -1.29 | -0.25 | Q9H6Z4   | RANBP3   |
| 686.1  | Charged multivesicular body prc   | 1.62E+06 | 1.24E+06 | 7.67E-01 | -1.30E+00 | -1.30 | -0.27 | Q7LBR1   | CHMP1B   |
| 44.1   | Peroxiredoxin-1                   | 2.35E+07 | 1.79E+07 | 7.63E-01 | -1.31E+00 | -1.31 | -0.27 | Q06830   | PRDX1    |
| 743.1  | HBS1-like protein                 | 4.85E+05 | 3.68E+05 | 7.58E-01 | -1.32E+00 | -1.32 | -0.28 | Q9Y450   | HBS1L    |
| 133.1  | Peroxiredoxin-6                   | 2.83E+07 | 2.14E+07 | 7.56E-01 | -1.32E+00 | -1.32 | -0.28 | P30041   | PRDX6    |
| 672.1  | Protein NOXP20                    | 3.06E+05 | 2.31E+05 | 7.54E-01 | -1.33E+00 | -1.33 | -0.28 | Q8IWE2   | FAM114A1 |
| 298.1  | Adenylate kinase 1                | 1.68E+06 | 1.26E+06 | 7.51E-01 | -1.33E+00 | -1.33 | -0.29 | Q5T9B7   | AK1      |
| 50.1   | Eukaryotic initiation factor 4A-I | 1.30E+07 | 9.69E+06 | 7.43E-01 | -1.35E+00 | -1.35 | -0.30 | P60842   | EIF4A1   |
| 52.1   | T-complex protein 1 subunit alp   | 2.36E+07 | 1.75E+07 | 7.43E-01 | -1.35E+00 | -1.35 | -0.30 | P17987   | TCP1     |
| 128.1  | Transketolase                     | 8.60E+06 | 6.31E+06 | 7.33E-01 | -1.36E+00 | -1.36 | -0.31 | P29401   | TKT      |
| 973.1  | Dynein heavy chain 17, axonem.    | 9.42E+04 | 6.87E+04 | 7.29E-01 | -1.37E+00 | -1.37 | -0.32 | Q9UFH2   | DNAH17   |
| 948.1  | Nuclear export mediator factor    | 9.29E+04 | 6.77E+04 | 7.29E-01 | -1.37E+00 | -1.37 | -0.32 | Q06524   | NEMF     |
| 264.2  | Chromobox protein homolog 1       | 1.13E+05 | 8.10E+04 | 7.15E-01 | -1.40E+00 | -1.40 | -0.33 | P83916   | CBX1     |
| 208.1  | Protein transport protein Sec31.  | 3.72E+06 | 2.63E+06 | 7.07E-01 | -1.41E+00 | -1.41 | -0.35 | D6REX3   | SEC31A   |
| 257.1  | RuvB-like 1                       | 1.02E+06 | 7.11E+05 | 6.96E-01 | -1.44E+00 | -1.44 | -0.36 | Q9Y265   | RUVBL1   |
| 1190.1 | NADP-dependent oxidoreductas      | 6.73E+05 | 4.67E+05 | 6.94E-01 | -1.44E+00 | -1.44 | -0.37 | Q6NXP6   | NOXRED1  |
| 468.1  | Endonuclease domain-containin     | 2.15E+05 | 1.49E+05 | 6.92E-01 | -1.45E+00 | -1.45 | -0.37 | Q94919   | ENDOD1   |
| 658.1  | Isoform 2 of F-box only protein : | 3.90E+05 | 2.68E+05 | 6.87E-01 | -1.46E+00 | -1.46 | -0.38 | Q8NFZ0-2 | FBXO18   |
| 9.1    | Tubulin beta-4B chain             | 4.64E+07 | 3.15E+07 | 6.79E-01 | -1.47E+00 | -1.47 | -0.39 | P68371   | TUBB4B   |
| 964.1  | G-protein coupled receptor 98     | 2.45E+05 | 1.66E+05 | 6.78E-01 | -1.47E+00 | -1.47 | -0.39 | Q8WXXG9  | GPR98    |

|        |                                   |          |          |          |           |       |       |          |          |
|--------|-----------------------------------|----------|----------|----------|-----------|-------|-------|----------|----------|
| 1215.1 | Nuclear RNA export factor 1       | 9.43E+04 | 6.39E+04 | 6.77E-01 | -1.48E+00 | -1.48 | -0.39 | Q9UBU9   | NXF1     |
| 1270.1 | Centriolar coiled-coil protein of | 7.87E+05 | 5.30E+05 | 6.74E-01 | -1.48E+00 | -1.48 | -0.39 | O43303   | CCP110   |
| 524.1  | LanC-like protein 1               | 3.53E+05 | 2.37E+05 | 6.72E-01 | -1.49E+00 | -1.49 | -0.40 | O43813   | LANCL1   |
| 250.1  | Tumor protein D52                 | 9.86E+05 | 6.62E+05 | 6.72E-01 | -1.49E+00 | -1.49 | -0.40 | F5H0B0   | TPD52    |
| 581.1  | Zinc finger homeobox protein 3    | 4.67E+05 | 3.10E+05 | 6.64E-01 | -1.51E+00 | -1.51 | -0.41 | Q15911   | ZFH3     |
| 574.1  | Zinc finger CCCH domain-containi  | 1.04E+05 | 6.91E+04 | 6.64E-01 | -1.51E+00 | -1.51 | -0.41 | E7ERS3   | ZC3H18   |
| 1097.1 | Dynein assembly factor 1, axone   | 1.26E+05 | 8.32E+04 | 6.58E-01 | -1.52E+00 | -1.52 | -0.42 | Q8NEP3   | DNAAF1   |
| 1292.1 | Isoform 3 of AT-rich interactive  | 1.05E+05 | 6.81E+04 | 6.48E-01 | -1.54E+00 | -1.54 | -0.43 | Q8NFD5-3 | ARID1B   |
| 1.2    | Epiplakin                         | 6.89E+07 | 4.45E+07 | 6.45E-01 | -1.55E+00 | -1.55 | -0.44 | P58107   | EPPK1    |
| 596.1  | Tyrosine--tRNA ligase, cytoplasm  | 7.27E+05 | 4.67E+05 | 6.42E-01 | -1.56E+00 | -1.56 | -0.44 | P54577   | YARS     |
| 1146.1 | Dynein heavy chain 8, axonemal    | 1.17E+05 | 7.46E+04 | 6.36E-01 | -1.57E+00 | -1.57 | -0.45 | H0Y7V4   | DNAH8    |
| 851.1  | Ubiquitin carboxyl-terminal hyd   | 5.07E+05 | 3.21E+05 | 6.34E-01 | -1.58E+00 | -1.58 | -0.46 | Q70CQ2   | USP34    |
| 1065.1 | Nuclear pore membrane glycop      | 5.90E+05 | 3.73E+05 | 6.32E-01 | -1.58E+00 | -1.58 | -0.46 | Q5VU65   | NUP210L  |
| 469.1  | Putative pre-mRNA-splicing fact   | 1.07E+06 | 6.69E+05 | 6.24E-01 | -1.60E+00 | -1.60 | -0.47 | O43143   | DHX15    |
| 1078.1 | Isoform KvB1.2 of Voltage-gatec   | 3.59E+05 | 2.24E+05 | 6.24E-01 | -1.60E+00 | -1.60 | -0.47 | Q14722-3 | KCNAB1   |
| 606.1  | Haloacid dehalogenase-like hyd    | 3.55E+06 | 2.20E+06 | 6.20E-01 | -1.61E+00 | -1.61 | -0.48 | Q9H0R4   | HDHD2    |
| 1025.1 | Putative rhophilin-2-like protein | 9.67E+04 | 5.88E+04 | 6.08E-01 | -1.64E+00 | -1.64 | -0.50 | A8MT19   | RHPN2P1  |
| 101.1  | Myosin light polypeptide 6        | 1.58E+07 | 9.59E+06 | 6.08E-01 | -1.64E+00 | -1.64 | -0.50 | B7Z6Z4   | MYL6     |
| 1191.1 | Synaptic vesicle glycoprotein 2B  | 3.78E+05 | 2.25E+05 | 5.95E-01 | -1.68E+00 | -1.68 | -0.52 | Q7L1I2   | SV2B     |
| 462.1  | N-alpha-acetyltransferase 50      | 1.04E+06 | 6.17E+05 | 5.93E-01 | -1.69E+00 | -1.69 | -0.52 | Q9GZZ1   | NAA50    |
| 420.1  | Long-chain-fatty-acid--CoA ligas  | 1.03E+05 | 6.06E+04 | 5.88E-01 | -1.70E+00 | -1.70 | -0.53 | P33121   | ACSL1    |
| 1124.1 | Adenomatous polyposis coli pro    | 4.91E+05 | 2.83E+05 | 5.76E-01 | -1.74E+00 | -1.74 | -0.55 | O95996   | APC2     |
| 541.1  | Protein HID1                      | 8.54E+05 | 4.90E+05 | 5.74E-01 | -1.74E+00 | -1.74 | -0.56 | Q8IV36   | HID1     |
| 88.3   | 14-3-3 protein gamma              | 6.54E+06 | 3.73E+06 | 5.70E-01 | -1.75E+00 | -1.75 | -0.56 | P61981   | YWHAG    |
| 135.1  | Sorbitol dehydrogenase            | 5.80E+06 | 3.28E+06 | 5.65E-01 | -1.77E+00 | -1.77 | -0.57 | Q00796   | SORD     |
| 734.1  | Vacuolar protein sorting-associa  | 1.01E+06 | 5.64E+05 | 5.58E-01 | -1.79E+00 | -1.79 | -0.58 | C9JN9    | VPS8     |
| 898.1  | Interferon-induced very large G   | 1.27E+05 | 7.06E+04 | 5.54E-01 | -1.80E+00 | -1.80 | -0.59 | Q7Z2Y8   | GVINP1   |
| 986.1  | UPF0693 protein C10orf32          | 1.12E+04 | 6.14E+03 | 5.47E-01 | -1.83E+00 | -1.83 | -0.60 | Q96B45   | C10orf32 |
| 794.1  | Hyaluronan synthase 1             | 5.66E+05 | 3.08E+05 | 5.44E-01 | -1.84E+00 | -1.84 | -0.61 | Q92839   | HAS1     |
| 328.1  | DnaI homolog subfamily A mem      | 1.13E+06 | 6.02E+05 | 5.32E-01 | -1.88E+00 | -1.88 | -0.63 | P31689   | DNAJA1   |
| 685.1  | Tektin-1                          | 3.08E+04 | 1.63E+04 | 5.29E-01 | -1.89E+00 | -1.89 | -0.64 | Q969V4   | TEKT1    |
| 304.1  | Phosphoglycerate mutase 1         | 4.62E+06 | 2.43E+06 | 5.26E-01 | -1.90E+00 | -1.90 | -0.64 | P18669   | PGAM1    |
| 234.1  | C-1-tetrahydrofolate synthase, c  | 3.70E+06 | 1.93E+06 | 5.22E-01 | -1.92E+00 | -1.92 | -0.65 | F5H2F4   | MTHFD1   |
| 1455.1 | Zinc finger CCCH domain-containi  | 2.59E+05 | 1.33E+05 | 5.14E-01 | -1.95E+00 | -1.95 | -0.67 | Q5T200   | ZC3H13   |
| 380.1  | Isoform 2 of Spectrin alpha chai  | 1.27E+06 | 6.45E+05 | 5.06E-01 | -1.97E+00 | -1.97 | -0.68 | Q13813-2 | SPTAN1   |

|        |                                     |          |          |          |           |       |       |          |          |
|--------|-------------------------------------|----------|----------|----------|-----------|-------|-------|----------|----------|
| 145.1  | Protein transport protein Sec16     | 6.59E+06 | 3.32E+06 | 5.04E-01 | -1.99E+00 | -1.99 | -0.69 | J3KNL6   | SEC16A   |
| 653.1  | Acidic leucine-rich nuclear phospho | 1.15E+06 | 5.80E+05 | 5.03E-01 | -1.99E+00 | -1.99 | -0.69 | P39687   | ANP32A   |
| 441.1  | N(G),N(G)-dimethylarginine dim      | 1.86E+06 | 9.36E+05 | 5.03E-01 | -1.99E+00 | -1.99 | -0.69 | O94760   | DDAH1    |
| 757.1  | Protein LOC100653515                | 4.04E+05 | 1.98E+05 | 4.90E-01 | -2.04E+00 | -2.04 | -0.71 | Q96MC4   | DDC8     |
| 1578.1 | Nucleolar complex protein 3 ho      | 5.51E+04 | 2.69E+04 | 4.88E-01 | -2.05E+00 | -2.05 | -0.72 | A6NJZ9   | NOC3L    |
| 310.1  | PEST proteolytic signal-containi    | 1.58E+06 | 7.67E+05 | 4.86E-01 | -2.06E+00 | -2.06 | -0.72 | Q8WW12   | PCNP     |
| 704.1  | Obg-like ATPase 1                   | 2.44E+05 | 1.18E+05 | 4.84E-01 | -2.06E+00 | -2.06 | -0.73 | J3KQ32   | OLA1     |
| 185.1  | Paternally-expressed gene 3 prc     | 3.20E+06 | 1.55E+06 | 4.84E-01 | -2.07E+00 | -2.07 | -0.73 | Q9GZU2   | PEG3     |
| 1368.1 | Integrin alpha-2                    | 1.78E+05 | 8.55E+04 | 4.81E-01 | -2.08E+00 | -2.08 | -0.73 | P17301   | ITGA2    |
| 41.1   | Unconventional myosin-VI            | 1.42E+07 | 6.71E+06 | 4.74E-01 | -2.11E+00 | -2.11 | -0.75 | Q9UM54   | MYO6     |
| 444.1  | Putative ubiquitin-conjugating e    | 3.54E+05 | 1.67E+05 | 4.72E-01 | -2.12E+00 | -2.12 | -0.75 | Q5JXB2   | UBE2NL   |
| 899.1  | Sorting nexin-6                     | 1.56E+05 | 7.30E+04 | 4.69E-01 | -2.13E+00 | -2.13 | -0.76 | Q9UNH7   | SNX6     |
| 929.1  | C-Myc-binding protein               | 1.03E+05 | 4.68E+04 | 4.54E-01 | -2.20E+00 | -2.20 | -0.79 | Q99417   | MYCBP    |
| 1414.1 | Isoform 2 of Nck-associated pro     | 1.90E+05 | 8.59E+04 | 4.52E-01 | -2.21E+00 | -2.21 | -0.79 | Q9Y2A7-2 | NCKAP1   |
| 24.1   | Tubulin alpha-1B chain              | 3.59E+07 | 1.61E+07 | 4.49E-01 | -2.23E+00 | -2.23 | -0.80 | P68363   | TUBA1B   |
| 491.1  | Isoform 3 of Shootin-1              | 6.91E+05 | 3.09E+05 | 4.47E-01 | -2.23E+00 | -2.23 | -0.80 | A0MZ66-3 | KIAA1598 |
| 780.1  | Isoform 3 of DCC-interacting prc    | 6.14E+05 | 2.70E+05 | 4.40E-01 | -2.27E+00 | -2.27 | -0.82 | Q8NEU8-3 | APPL2    |
| 983.1  | 26S proteasome non-ATPase re        | 1.48E+05 | 6.49E+04 | 4.40E-01 | -2.27E+00 | -2.27 | -0.82 | O00233   | PSMD9    |
| 170.1  | Glycogen phosphorylase, brain f     | 6.16E+06 | 2.69E+06 | 4.37E-01 | -2.29E+00 | -2.29 | -0.83 | P11216   | PYGB     |
| 398.1  | Ran-specific GTPase-activating p    | 5.97E+05 | 2.61E+05 | 4.37E-01 | -2.29E+00 | -2.29 | -0.83 | P43487   | RANBP1   |
| 1298.1 | Interferon-induced guanylate-bi     | 9.12E+05 | 3.95E+05 | 4.33E-01 | -2.31E+00 | -2.31 | -0.84 | P32456   | GBP2     |
| 534.1  | Transcriptional activator proteir   | 2.40E+05 | 1.03E+05 | 4.30E-01 | -2.33E+00 | -2.33 | -0.84 | Q96QR8   | PURB     |
| 1789.1 | Sorting nexin-2                     | 1.62E+04 | 6.94E+03 | 4.29E-01 | -2.33E+00 | -2.33 | -0.85 | O60749   | SNX2     |
| 293.1  | Charged multivesicular body prc     | 3.95E+06 | 1.69E+06 | 4.28E-01 | -2.34E+00 | -2.34 | -0.85 | O43633   | CHMP2A   |
| 465.1  | 6-phosphogluconate dehydroge        | 9.78E+05 | 4.03E+05 | 4.12E-01 | -2.43E+00 | -2.43 | -0.89 | P52209   | PGD      |
| 503.1  | Trifunctional purine biosyntheti    | 1.92E+06 | 7.85E+05 | 4.09E-01 | -2.45E+00 | -2.45 | -0.89 | P22102   | GART     |
| 621.1  | Alpha/beta hydrolase domain-cr      | 3.51E+06 | 1.42E+06 | 4.05E-01 | -2.47E+00 | -2.47 | -0.90 | Q96IU4   | ABHD14B  |
| 1387.1 | Protocadherin beta-16               | 4.55E+05 | 1.82E+05 | 4.00E-01 | -2.50E+00 | -2.50 | -0.92 | Q9NRJ7   | PCDHB16  |
| 762.1  | Calcium-regulated heat stable p     | 6.21E+05 | 2.43E+05 | 3.91E-01 | -2.55E+00 | -2.55 | -0.94 | Q9Y2V2   | CARHSP1  |
| 816.1  | Isoform 4 of Myotubularin-relat     | 6.83E+05 | 2.60E+05 | 3.80E-01 | -2.63E+00 | -2.63 | -0.97 | O95248-4 | SBF1     |
| 1363.1 | Centrosomal protein of 152 kDa      | 1.24E+05 | 4.70E+04 | 3.78E-01 | -2.65E+00 | -2.65 | -0.97 | O94986   | CEP152   |
| 765.1  | Isoform 2 of Eukaryotic translati   | 2.99E+05 | 1.13E+05 | 3.78E-01 | -2.65E+00 | -2.65 | -0.97 | P06730-2 | EIF4E    |
| 695.1  | Proteasome subunit alpha type-      | 1.05E+06 | 3.91E+05 | 3.72E-01 | -2.69E+00 | -2.69 | -0.99 | P25787   | PSMA2    |
| 403.1  | FLYWCH family member 2              | 1.40E+06 | 5.09E+05 | 3.65E-01 | -2.74E+00 | -2.74 | -1.01 | I3L1Y9   | FLYWCH2  |
| 792.1  | Amyotrophic lateral sclerosis 2 c   | 3.44E+04 | 1.23E+04 | 3.58E-01 | -2.79E+00 | -2.79 | -1.03 | Q53TS8   | ALS2CR11 |

|        |                                   |          |          |          |           |       |       |          |           |
|--------|-----------------------------------|----------|----------|----------|-----------|-------|-------|----------|-----------|
| 458.1  | Cellular nucleic acid-binding pro | 4.39E+06 | 1.57E+06 | 3.58E-01 | -2.79E+00 | -2.79 | -1.03 | P62633   | CNBP      |
| 525.1  | Tumor protein D52-like 2          | 1.95E+06 | 6.91E+05 | 3.54E-01 | -2.82E+00 | -2.82 | -1.04 | O43399   | TPD52L2   |
| 168.1  | Nucleoside diphosphate kinase     | 3.28E+05 | 1.16E+05 | 3.54E-01 | -2.82E+00 | -2.82 | -1.04 | Q32Q12   | NME1-NME2 |
| 719.1  | Acidic leucine-rich nuclear phos  | 1.10E+06 | 3.88E+05 | 3.52E-01 | -2.84E+00 | -2.84 | -1.04 | Q92688   | ANP32B    |
| 1182.1 | Neuroendocrine convertase 1       | 2.99E+05 | 1.04E+05 | 3.48E-01 | -2.88E+00 | -2.88 | -1.06 | P29120   | PCSK1     |
| 1265.1 | Serine/threonine-protein kinase   | 6.57E+04 | 2.28E+04 | 3.47E-01 | -2.88E+00 | -2.88 | -1.06 | Q96GX5   | MASTL     |
| 1177.1 | 28S ribosomal protein S7, mitoc   | 1.12E+05 | 3.83E+04 | 3.41E-01 | -2.93E+00 | -2.93 | -1.08 | J3QLS3   | MRPS7     |
| 998.1  | Neurogenic locus notch homolo     | 3.44E+06 | 1.17E+06 | 3.40E-01 | -2.94E+00 | -2.94 | -1.08 | Q04721   | NOTCH2    |
| 1295.1 | Egl nine homolog 1                | 1.64E+05 | 5.51E+04 | 3.36E-01 | -2.97E+00 | -2.97 | -1.09 | Q9GZT9   | EGLN1     |
| 801.1  | Nuclear transport factor 2        | 1.27E+06 | 4.07E+05 | 3.20E-01 | -3.13E+00 | -3.13 | -1.14 | P61970   | NUTF2     |
| 64.1   | Calpain-1 catalytic subunit       | 1.48E+07 | 4.71E+06 | 3.19E-01 | -3.13E+00 | -3.13 | -1.14 | P07384   | CAPN1     |
| 504.1  | Small ubiquitin-related modifier  | 7.44E+06 | 2.34E+06 | 3.14E-01 | -3.18E+00 | -3.18 | -1.16 | B4DUW4   | SUMO3     |
| 682.1  | Son of sevenless homolog 2        | 1.03E+06 | 3.24E+05 | 3.14E-01 | -3.18E+00 | -3.18 | -1.16 | Q07890   | SOS2      |
| 215.1  | Lactoylglutathione lyase          | 8.38E+06 | 2.62E+06 | 3.13E-01 | -3.20E+00 | -3.20 | -1.16 | Q04760   | GLO1      |
| 461.1  | ADP-ribosylation factor GTPase-   | 3.43E+05 | 1.05E+05 | 3.06E-01 | -3.26E+00 | -3.26 | -1.18 | Q9NP61   | ARFGAP3   |
| 55.1   | T-complex protein 1 subunit the   | 1.27E+07 | 3.87E+06 | 3.04E-01 | -3.29E+00 | -3.29 | -1.19 | P50990   | CCT8      |
| 1484.1 | Adenylate cyclase type 8          | 5.04E+05 | 1.53E+05 | 3.03E-01 | -3.30E+00 | -3.30 | -1.19 | P40145   | ADCY8     |
| 512.1  | Tryptophan--tRNA ligase, cytopl   | 1.07E+07 | 3.24E+06 | 3.02E-01 | -3.31E+00 | -3.31 | -1.20 | P23381   | WARS      |
| 773.1  | Neuroblastoma-amplified seque     | 1.03E+06 | 3.09E+05 | 3.00E-01 | -3.34E+00 | -3.34 | -1.21 | A2RRP1   | NBAS      |
| 835.1  | G antigen 1                       | 2.46E+06 | 7.29E+05 | 2.97E-01 | -3.37E+00 | -3.37 | -1.21 | Q13065   | GAGE1     |
| 554.1  | Endoplasmic reticulum resident    | 4.80E+05 | 1.39E+05 | 2.89E-01 | -3.45E+00 | -3.45 | -1.24 | P30040   | ERP29     |
| 448.1  | PDZ and LIM domain protein 5      | 5.38E+05 | 1.55E+05 | 2.88E-01 | -3.47E+00 | -3.47 | -1.24 | Q96HC4   | PDLIM5    |
| 543.1  | Ras-related protein Rab-10        | 4.85E+05 | 1.39E+05 | 2.86E-01 | -3.49E+00 | -3.49 | -1.25 | P61026   | RAB10     |
| 896.1  | Acidic leucine-rich nuclear phos  | 7.27E+05 | 2.02E+05 | 2.78E-01 | -3.60E+00 | -3.60 | -1.28 | Q9BTT0   | ANP32E    |
| 161.1  | Ubiquitin-40S ribosomal protein   | 5.14E+07 | 1.42E+07 | 2.76E-01 | -3.62E+00 | -3.62 | -1.29 | P62979   | RPS27A    |
| 396.1  | Proteasome subunit alpha type     | 3.04E+05 | 8.40E+04 | 2.76E-01 | -3.62E+00 | -3.62 | -1.29 | G3V5Z7   | PSMA6     |
| 3.2    | Vimentin                          | 2.12E+07 | 5.80E+06 | 2.73E-01 | -3.66E+00 | -3.66 | -1.30 | P08670   | VIM       |
| 952.1  | Lysine-specific demethylase 3B    | 1.17E+05 | 3.20E+04 | 2.73E-01 | -3.66E+00 | -3.66 | -1.30 | Q7LBC6   | KDM3B     |
| 337.1  | Phosphoglucomutase-2              | 2.20E+06 | 5.94E+05 | 2.70E-01 | -3.71E+00 | -3.71 | -1.31 | Q96G03   | PGM2      |
| 601.1  | Isoform 3 of Serine/threonine-p   | 1.14E+06 | 3.04E+05 | 2.66E-01 | -3.76E+00 | -3.76 | -1.32 | O00743-3 | PPP6C     |
| 763.1  | Intercellular adhesion molecule   | 4.75E+04 | 1.24E+04 | 2.61E-01 | -3.83E+00 | -3.83 | -1.34 | Q9UMF0   | ICAM5     |
| 1102.1 | Na(+)/H(+) exchange regulatory    | 2.51E+05 | 6.48E+04 | 2.58E-01 | -3.87E+00 | -3.87 | -1.35 | Q15599   | SLC9A3R2  |
| 1502.1 | WAP, Kazal, immunoglobulin, K     | 3.81E+05 | 9.85E+04 | 2.58E-01 | -3.87E+00 | -3.87 | -1.35 | Q8TEU8   | WFIKKN2   |
| 379.1  | Protein SEC13 homolog             | 6.21E+06 | 1.60E+06 | 2.58E-01 | -3.88E+00 | -3.88 | -1.36 | B4DXJ1   | SEC13     |
| 421.1  | F-actin-capping protein subunit   | 1.49E+06 | 3.77E+05 | 2.54E-01 | -3.94E+00 | -3.94 | -1.37 | P47755   | CAPZA2    |



|        |                                                          |          |          |          |           |       |       |        |         |
|--------|----------------------------------------------------------|----------|----------|----------|-----------|-------|-------|--------|---------|
| 430.1  | Bifunctional ATP-dependent dihydrolyase                  | 1.62E+06 | 4.10E+05 | 2.53E-01 | -3.95E+00 | -3.95 | -1.37 | Q3LXA3 | DAK     |
| 1444.1 | EF-hand calcium-binding domain protein                   | 2.72E+05 | 6.89E+04 | 2.53E-01 | -3.95E+00 | -3.95 | -1.37 | A4FU69 | EFCAB5  |
| 1106.1 | Cytochrome b-c1 complex subunit 1                        | 3.08E+05 | 7.77E+04 | 2.52E-01 | -3.97E+00 | -3.97 | -1.38 | P31930 | UQCRC1  |
| 880.1  | 1-phosphatidylinositol 4,5-bisphosphate 3-kinase class I | 1.46E+06 | 3.64E+05 | 2.50E-01 | -4.00E+00 | -4.00 | -1.39 | E2QRH8 | PLCB4   |
| 14.1   | Myosin-9                                                 | 2.88E+07 | 6.88E+06 | 2.39E-01 | -4.19E+00 | -4.19 | -1.43 | P35579 | MYH9    |
| 346.1  | Gamma-glutamylcyclotransferase                           | 1.27E+06 | 2.97E+05 | 2.33E-01 | -4.29E+00 | -4.29 | -1.46 | O75223 | GGCT    |
| 376.1  | Nuclear autoantigenic sperm protein                      | 6.41E+04 | 1.48E+04 | 2.31E-01 | -4.33E+00 | -4.33 | -1.47 | P49321 | NASP    |
| 290.1  | Glycine--tRNA ligase                                     | 1.73E+06 | 3.90E+05 | 2.26E-01 | -4.43E+00 | -4.43 | -1.49 | P41250 | GARS    |
| 138.1  | Proliferating cell nuclear antigen                       | 9.11E+06 | 2.02E+06 | 2.22E-01 | -4.51E+00 | -4.51 | -1.51 | P12004 | PCNA    |
| 233.1  | tRNA (cytosine(34)-C(5))-methyltransferase               | 1.94E+06 | 4.22E+05 | 2.17E-01 | -4.60E+00 | -4.60 | -1.53 | Q08J23 | NSUN2   |
| 683.1  | Sorting nexin-12                                         | 8.88E+05 | 1.92E+05 | 2.16E-01 | -4.62E+00 | -4.62 | -1.53 | Q9UMY4 | SNX12   |
| 455.1  | Exportin-1                                               | 3.90E+06 | 8.06E+05 | 2.07E-01 | -4.84E+00 | -4.84 | -1.58 | O14980 | XPO1    |
| 587.1  | Nebulin                                                  | 1.02E+06 | 2.09E+05 | 2.05E-01 | -4.89E+00 | -4.89 | -1.59 | F8WCL5 | NEB     |
| 724.1  | Coiled-coil domain-containing protein                    | 5.30E+06 | 1.08E+06 | 2.04E-01 | -4.91E+00 | -4.91 | -1.59 | Q8NDH2 | CCDC168 |
| 2158.1 | SWI/SNF-related matrix-associated protein                | 3.23E+05 | 6.41E+04 | 1.99E-01 | -5.03E+00 | -5.03 | -1.62 | Q96GM5 | SMARCD1 |
| 643.1  | Multiple PDZ domain protein                              | 8.79E+05 | 1.74E+05 | 1.98E-01 | -5.05E+00 | -5.05 | -1.62 | F5H1U9 | MPDZ    |
| 353.2  | C-terminal-binding protein 1                             | 1.07E+06 | 2.08E+05 | 1.94E-01 | -5.15E+00 | -5.15 | -1.64 | Q13363 | CTBP1   |
| 141.2  | Destrin                                                  | 3.55E+06 | 6.86E+05 | 1.93E-01 | -5.17E+00 | -5.17 | -1.64 | P60981 | DSTN    |
| 486.1  | Transgelin-2                                             | 8.40E+05 | 1.61E+05 | 1.92E-01 | -5.22E+00 | -5.22 | -1.65 | P37802 | TAGLN2  |
| 1330.1 | Signal transducer and activator of transcription 3       | 1.73E+05 | 3.24E+04 | 1.87E-01 | -5.34E+00 | -5.34 | -1.67 | P42224 | STAT1   |
| 456.1  | Ladinin-1                                                | 5.85E+05 | 1.08E+05 | 1.85E-01 | -5.42E+00 | -5.42 | -1.69 | E9PDI4 | LAD1    |
| 1019.1 | Clustered mitochondria protein                           | 1.28E+05 | 2.34E+04 | 1.82E-01 | -5.49E+00 | -5.49 | -1.70 | O75153 | CLUH    |
| 1033.1 | Homeobox protein TGIF1                                   | 2.59E+05 | 4.62E+04 | 1.79E-01 | -5.60E+00 | -5.60 | -1.72 | Q15583 | TGIF1   |
| 915.1  | Spectrin beta chain, non-erythrocyte                     | 9.02E+05 | 1.57E+05 | 1.74E-01 | -5.74E+00 | -5.74 | -1.75 | Q9NRC6 | SPTBN5  |
| 1187.1 | 1-phosphatidylinositol 4,5-bisphosphate 3-kinase class I | 7.87E+06 | 1.36E+06 | 1.73E-01 | -5.78E+00 | -5.78 | -1.76 | Q86YW0 | PLCZ1   |
| 1053.1 | Cell division cycle and apoptosis control protein        | 1.73E+05 | 2.95E+04 | 1.71E-01 | -5.86E+00 | -5.86 | -1.77 | Q8IX12 | CCAR1   |
| 378.1  | Nascent polypeptide-associated complex 1                 | 6.83E+06 | 1.16E+06 | 1.70E-01 | -5.89E+00 | -5.89 | -1.77 | E9PAV3 | NACA    |
| 777.1  | Mortality factor 4-like protein 2                        | 1.63E+05 | 2.44E+04 | 1.50E-01 | -6.67E+00 | -6.67 | -1.90 | Q15014 | MORF4L2 |
| 3.3    | Keratin, type II cytoskeletal 6B                         | 2.37E+05 | 3.51E+04 | 1.48E-01 | -6.74E+00 | -6.74 | -1.91 | P04259 | KRT6B   |
| 1488.1 | Protein-tyrosine sulfotransferase                        | 2.02E+05 | 2.88E+04 | 1.42E-01 | -7.02E+00 | -7.02 | -1.95 | O60507 | TPST1   |
| 111.1  | Spectrin beta chain, non-erythrocyte                     | 5.18E+06 | 7.31E+05 | 1.41E-01 | -7.08E+00 | -7.08 | -1.96 | O15020 | SPTBN2  |
| 251.1  | Protein arginine N-methyltransferase                     | 5.16E+06 | 7.17E+05 | 1.39E-01 | -7.19E+00 | -7.19 | -1.97 | H7C2I1 | PRMT1   |
| 200.1  | Stress-induced-phosphoprotein                            | 2.36E+06 | 3.17E+05 | 1.35E-01 | -7.43E+00 | -7.43 | -2.01 | P31948 | STIP1   |
| 152.1  | Src substrate cortactin                                  | 7.55E+06 | 1.01E+06 | 1.34E-01 | -7.48E+00 | -7.48 | -2.01 | Q14247 | CTTN    |
| 19.1   | Actin, cytoplasmic 2                                     | 2.20E+08 | 2.86E+07 | 1.30E-01 | -7.71E+00 | -7.71 | -2.04 | P63261 | ACTG1   |

|        |                                     |          |          |          |           |        |       |          |          |
|--------|-------------------------------------|----------|----------|----------|-----------|--------|-------|----------|----------|
| 1255.1 | Protein EFR3 homolog A              | 3.77E+05 | 4.80E+04 | 1.27E-01 | -7.86E+00 | -7.86  | -2.06 | H9KV44   | EFR3A    |
| 980.1  | Serine/threonine-protein phosph     | 9.06E+04 | 1.10E+04 | 1.21E-01 | -8.23E+00 | -8.23  | -2.11 | Q13362   | PPP2R5C  |
| 845.1  | Annexin A5                          | 1.61E+05 | 1.94E+04 | 1.21E-01 | -8.29E+00 | -8.29  | -2.11 | P08758   | ANXA5    |
| 277.1  | Signal recognition particle 9 kDa   | 8.61E+06 | 1.02E+06 | 1.18E-01 | -8.44E+00 | -8.44  | -2.13 | P49458   | SRP9     |
| 1009.1 | Matrix metalloproteinase-28         | 1.01E+06 | 1.19E+05 | 1.18E-01 | -8.45E+00 | -8.45  | -2.13 | K7ENP0   | MMP28    |
| 354.1  | Transcription initiation factor IIE | 1.29E+06 | 1.48E+05 | 1.14E-01 | -8.74E+00 | -8.74  | -2.17 | Q00403   | GTF2B    |
| 625.1  | UDP-glucose:glycoprotein gluco      | 2.45E+06 | 2.72E+05 | 1.11E-01 | -8.99E+00 | -8.99  | -2.20 | Q9NYU2   | UGGT1    |
| 689.1  | PHD finger protein 3                | 8.54E+05 | 9.44E+04 | 1.11E-01 | -9.05E+00 | -9.05  | -2.20 | Q92576   | PHF3     |
| 361.1  | Catechol O-methyltransferase        | 2.70E+06 | 2.55E+05 | 9.45E-02 | -1.06E+01 | -10.00 | -2.36 | P21964   | COMT     |
| 244.1  | LIM domain and actin-binding p      | 4.91E+06 | 4.56E+05 | 9.28E-02 | -1.08E+01 | -10.00 | -2.38 | Q9UHB6   | LIMA1    |
| 714.1  | Nuclear receptor corepressor 1      | 9.60E+04 | 8.70E+03 | 9.06E-02 | -1.10E+01 | -10.00 | -2.40 | O75376   | NCOR1    |
| 1049.1 | Protein NDRG1                       | 1.17E+05 | 1.01E+04 | 8.61E-02 | -1.16E+01 | -10.00 | -2.45 | Q92597   | NDRG1    |
| 928.1  | Unconventional myosin-IXb           | 1.09E+06 | 8.69E+04 | 7.96E-02 | -1.26E+01 | -10.00 | -2.53 | Q13459   | MYO9B    |
| 627.1  | E3 ubiquitin-protein ligase RNF1    | 4.13E+06 | 3.03E+05 | 7.33E-02 | -1.36E+01 | -10.00 | -2.61 | C9J266   | RNF123   |
| 775.1  | Hydroxyacid-oxoacid transhydr       | 4.66E+05 | 3.33E+04 | 7.14E-02 | -1.40E+01 | -10.00 | -2.64 | Q8IWW8   | ADHFE1   |
| 632.2  | CLASP1 protein                      | 1.59E+05 | 1.12E+04 | 7.06E-02 | -1.42E+01 | -10.00 | -2.65 | B7ZLX3   | CLASP1   |
| 861.1  | Splicing factor 3B subunit 1        | 1.37E+05 | 9.64E+03 | 7.01E-02 | -1.43E+01 | -10.00 | -2.66 | O75533   | SF3B1    |
| 733.1  | Beta-hexosaminidase subunit al      | 1.44E+05 | 9.31E+03 | 6.49E-02 | -1.54E+01 | -10.00 | -2.74 | H3BP20   | HEXA     |
| 23.1   | Isoform 3 of Caldesmon              | 2.89E+07 | 1.74E+06 | 6.02E-02 | -1.66E+01 | -10.00 | -2.81 | Q05682-3 | CALD1    |
| 768.1  | Isoform 2 of L-fucose kinase        | 2.82E+05 | 1.63E+04 | 5.78E-02 | -1.73E+01 | -10.00 | -2.85 | Q8N0W3-2 | FUK      |
| 720.1  | 26S proteasome non-ATPase re        | 3.08E+06 | 1.41E+05 | 4.57E-02 | -2.19E+01 | -10.00 | -3.09 | P51665   | PSMD7    |
| 1318.1 | Antigen KI-67                       | 3.87E+05 | 1.54E+04 | 3.98E-02 | -2.51E+01 | -10.00 | -3.22 | P46013   | MKI67    |
| 1032.1 | Microtubule-associated protein      | 4.79E+05 | 1.40E+04 | 2.92E-02 | -3.42E+01 | -10.00 | -3.53 | P10636   | MAPT     |
| 481.1  | Serpin B6                           | 5.73E+05 | 1.39E+04 | 2.42E-02 | -4.12E+01 | -10.00 | -3.72 | P35237   | SERPINB6 |
| 470.1  | Heterogeneous nuclear ribonuc       | 3.03E+06 | 7.32E+04 | 2.41E-02 | -4.14E+01 | -10.00 | -3.72 | Q00839   | HNRNPU   |
| 831.1  | Sacsin                              | 1.22E+07 | 2.91E+05 | 2.38E-02 | -4.20E+01 | -10.00 | -3.74 | Q9NZJ4   | SACS     |
| 1099.1 | Receptor-type tyrosine-protein      | 5.29E+05 | 1.17E+04 | 2.21E-02 | -4.52E+01 | -10.00 | -3.81 | P10586   | PTPRF    |
| 84.1   | Filamin-A                           | 6.94E+06 | 1.51E+05 | 2.18E-02 | -4.59E+01 | -10.00 | -3.83 | P21333   | FLNA     |
| 1283.1 | Isoform 2 of Nebulin-related-an     | 9.17E+05 | 1.83E+04 | 2.00E-02 | -5.01E+01 | -10.00 | -3.91 | Q86VF7-2 | NRAP     |
| 1222.1 | Retinoblastoma-associated prot      | 2.29E+05 | 4.49E+03 | 1.96E-02 | -5.11E+01 | -10.00 | -3.93 | P06400   | RB1      |
| 21.1   | Isoform 2 of Tropomyosin alpha      | 5.43E+07 | 6.98E+05 | 1.29E-02 | -7.78E+01 | -10.00 | -4.35 | P06753-2 | TPM3     |
| 1180.1 | Segment polarity protein dishev     | 5.70E+05 | 7.13E+03 | 1.25E-02 | -8.00E+01 | -10.00 | -4.38 | O14640   | DVL1     |
| 12.1   | Alpha-actinin-4                     | 9.17E+07 | 1.03E+06 | 1.12E-02 | -8.90E+01 | -10.00 | -4.49 | O43707   | ACTN4    |
| 992.1  | Tetratricopeptide repeat protei     | 4.23E+06 | 3.88E+04 | 9.18E-03 | -1.09E+02 | -10.00 | -4.69 | Q8IYW2   | TTC40    |
| 19.2   | Actin, aortic smooth muscle         | 5.62E+07 | 5.00E+05 | 8.90E-03 | -1.12E+02 | -10.00 | -4.72 | P62736   | ACTA2    |

|       |                                 |          |          |          |           |        |       |        |          |
|-------|---------------------------------|----------|----------|----------|-----------|--------|-------|--------|----------|
| 389.1 | Translin                        | 3.71E+06 | 3.00E+04 | 8.09E-03 | -1.24E+02 | -10.00 | -4.82 | E9PGT1 | TSN      |
| 196.1 | Coiled-coil domain-containing p | 4.60E+06 | 1.94E+04 | 4.22E-03 | -2.37E+02 | -10.00 | -5.47 | Q8IVM0 | CCDC50   |
| 788.1 | Nuclear migration protein nudC  | 6.35E+05 | 1.88E+03 | 2.96E-03 | -3.38E+02 | -10.00 | -5.82 | Q9Y266 | NUDC     |
| 192.1 | Protein phosphatase 1 regulator | 4.25E+06 | 8.99E+03 | 2.12E-03 | -4.72E+02 | -10.00 | -6.16 | O14974 | PPP1R12A |

**Supplemental Table 2.** Known AR-interacting proteins identified in the proteomic screen

Data was collated through PUBMED, HPPRD, BIOGRID, BIND and McGill AR database and current publications

Note: Cells highlighted in green indicate proteins enriched in the AD sample, highlighted in red indicate proteins enriched in the AS sample, highlighted in yellow indicate 1:1 AS

Cells not highlighted were AR-interacting proteins not found in the proteomic screen.

| Subgroup | Official Gene symbol | Other names | UniProt ID | Binding              | Description                                                                                               | Author           | Pubmed ID | Journal                                       | MS Data (Fold Change) |
|----------|----------------------|-------------|------------|----------------------|-----------------------------------------------------------------------------------------------------------|------------------|-----------|-----------------------------------------------|-----------------------|
| 16       | ACTN4                |             | O43707     | Direct Binding       | ACTN4_HUMAN Alpha-actinin-4                                                                               | Jasavala R et al | 17052974  | Mol Cell Proteomics                           | -10.00                |
| 81       | FLNA                 |             | P21333     | direct binding       | FLNA_HUMAN Filamin-A                                                                                      |                  |           |                                               | -10.00                |
| 25       | NCOR1                |             | O75376     | direct binding       | NCOR1_HUMAN Nuclear receptor corepressor 1                                                                |                  |           |                                               | -10.00                |
| 211      | TGIF1                |             | Q15583     | direct, coR          | TGIF1_HUMAN Homeobox protein TGIF1                                                                        |                  |           |                                               | -5.60                 |
| 264      | SMARCD1              |             | Q96GM5     | direct, coA          | SMRD1_HUMAN SWI/SNF-related matrix-associated actin-dependent regulator of chromatin subfamily D member 1 |                  | 19762545  | van de Wijngaart DJ et al Mol Endocrinol 2009 | -5.03                 |
| 147      | SUMO3                |             | P55854     | coA, coR             | SUMO3_HUMAN Small ubiquitin-related modifier 3                                                            |                  |           |                                               | -3.18                 |
| 316      | MYO6                 |             | Q9UM54     | direct, coA          | MYO6_HUMAN Myosin-VI                                                                                      |                  | 19787211  |                                               | -2.11                 |
| 112      | ANP32A               |             | P39687     | direct binding       | AN32A_HUMAN Acidic leucine-rich nuclear phosphoprotein 32 family member A                                 |                  |           |                                               | -1.99                 |
| 313      | APPL1                |             | Q9UKG1     | indirect, coR        | DP13A_HUMAN DCC-interacting protein 13-alpha                                                              |                  |           |                                               | Unique-AD             |
| 47       | CDK1                 |             | P06493     | shown to phosphoryla | CDK1_HUMAN Cyclin-dependent kinase 1                                                                      |                  |           |                                               | Unique-AD             |
| 219      | HSPB2                |             | Q16082     | direct, coA          | HSPB2_HUMAN Heat shock protein beta-2                                                                     |                  |           |                                               | Unique-AD             |
| 212      | NCOA2                |             | Q15596     | direct, coA          | NCOA2_HUMAN Nuclear receptor coactivator 2                                                                |                  |           |                                               | Unique-AD             |
| 122      | NRIP1                |             | P48552     | direct binding       | NRIP1_HUMAN Nuclear receptor-interacting protein 1                                                        |                  |           |                                               | Unique-AD             |
| 267      | NSD1                 | STO         | Q96L73     | direct, coA          | NSD1_HUMAN Histone-lysine N-methyltransferase, H3 lysine-36 and H4 lysine-20 specific                     |                  |           |                                               | Unique-AD             |

|     |        |      |        |                                            |                                                                      |          |                                                                              |           |
|-----|--------|------|--------|--------------------------------------------|----------------------------------------------------------------------|----------|------------------------------------------------------------------------------|-----------|
| 118 | PIK3CB |      | P42338 | p110b required for AR subunit beta isoform | PK3CB_HUMAN Phosphatidylinositol-4,5-bisphosphate 3-kinase catalytic |          |                                                                              | Unique-AD |
| 92  | PIK3R1 |      | P27986 | p85 required for AR-DI                     | P85A_HUMAN Phosphatidylinositol 3-kinase regulatory subunit alpha    |          |                                                                              | Unique-AD |
| 62  | XRCC5  |      | P13010 | direct binding                             | XRCC5_HUMAN X-ray repair cross-complementing protein 5               |          |                                                                              | Unique-AD |
| 61  | XRCC6  |      | P12956 | direct binding                             | XRCC6_HUMAN X-ray repair cross-complementing protein 6               |          |                                                                              | Unique-AD |
| 315 | ZMIZ1  |      | Q9ULJ6 | direct, coA                                | ZMIZ1_HUMAN Zinc finger MIZ domain-containing protein 1              |          |                                                                              | Unique-AD |
| 237 | TH1L   |      | Q8IXH7 | direct, affinity capture                   | NELFD_HUMAN Negative elongation factor C/D                           |          |                                                                              | Unique-AD |
| 33  | SVIL   |      | O95425 | direct binding                             | SVIL_HUMAN Supervillin                                               |          |                                                                              | Unique-AD |
| 213 | MED1   |      | Q15648 | direct, coA                                | MED1_HUMAN Mediator of RNA polymerase II transcription subunit 1     |          |                                                                              | Unique-AD |
| 235 | CARM1  |      | Q86X55 | indirect, coA                              | CARM1_HUMAN Histone-arginine methyltransferase CARM1                 |          |                                                                              | Unique-AD |
| 208 | PRKD1  |      | Q15139 | direct, coR                                | KPCD1_HUMAN Serine/threonine-protein kinase D1                       |          |                                                                              | Unique-AD |
| 283 | BRD8   |      | Q9H0E9 | direct, coA                                | BRD8_HUMAN Bromodomain-containing protein 8                          | 18560202 | Hosoya T et al Endocr J 55(4) 657-65 2008                                    | Unique-AD |
| 349 | STUB1  | CHIP | Q9UNE7 | direct, target for degradation             | E3 ubiquitin-protein ligase CHIP                                     | 16725394 | Rees I et al Bichim Biophys Acta. 2006 Jun; 1764(6): 1073-9. Epub 2006 Apr 4 | Unique-AD |
| 80  | CDK11B |      | P21127 | direct binding                             | CD11B_HUMAN Cell division protein kinase 11B                         |          |                                                                              | Unique-AD |
| 12  | DAPK3  |      | O43293 | Direct Binding                             | DAPK3_HUMAN Death-associated protein kinase 3                        |          |                                                                              | Unique-AD |

|     |        |         |        |                     |                                                                                                                 |          |                                                 |           |
|-----|--------|---------|--------|---------------------|-----------------------------------------------------------------------------------------------------------------|----------|-------------------------------------------------|-----------|
| 266 | EHMT2  |         | Q96KQ7 | indirect, coA       | EHMT2_HUMAN Histone-lysine N-methyltransferase, H3 lysine-9 specific 3                                          |          |                                                 | Unique-AD |
| 260 | KAT5   |         | Q92993 | direct, coA         | KAT5_HUMAN Histone acetyltransferase KAT5                                                                       |          |                                                 | Unique-AD |
| 11  | PER1   |         | O15534 | Direct Binding, coA | PER1_HUMAN Period circadian protein homolog 1                                                                   |          |                                                 | Unique-AD |
| 149 | PTEN   |         | P60484 | direct binidng      | PTEN_HUMAN Phosphatidylinositol-3,4,5-trisphosphate 3-phosphatase and dual-specificity protein phosphatase PTEN |          |                                                 | Unique-AD |
| 321 | RNF6   |         | Q9Y252 | direct, coA         | RNF6_HUMAN RING finger protein 6                                                                                |          |                                                 | Unique-AD |
| 17  | SGTA   |         | O43765 | Direct Binding      | SGTA_HUMAN Small glutamine-rich tetratricopeptide repeat-containing protein alpha                               |          |                                                 | Unique-AD |
| 342 | CHD8   |         | Q9HCK8 | direct binding/coA  | chromatin remodeling factor CHD8                                                                                | 20308527 | Menon T et al Mol Endocrinol 24(6) 1165-74 2010 | 2.04      |
| 152 | COPS2  |         | P61201 | direct bindingig    | CSN2_HUMAN COP9 signalosome complex subunit 2                                                                   |          |                                                 | 2.04      |
| 300 | SENP1  |         | Q9P0U3 | indirect, coA       | SENP1_HUMAN Sentrin-specific protease 1                                                                         |          |                                                 | 2.41      |
| 257 | KIFAP3 |         | Q92845 | direct, y-2-hybrid  | KIFA3_HUMAN Kinesin-associated protein 3                                                                        |          |                                                 | 2.44      |
| 103 | MCM7   |         | P33993 | direct binding      | MCM7_HUMAN DNA replication licensing factor MCM7                                                                |          |                                                 | 2.44      |
| 343 | CBX1   | HP1beta | P83916 | direct binding/coA  | Human heterochromatin protein 1 isoform HP1beta                                                                 | 20308360 | Shiota M et al Endocr Relat Cancer 17(2) 2010   | 2.92      |
| 221 | CDC37  |         | Q16543 | direct, coA         | CDC37_HUMAN Hsp90 co-chaperone Cdc37                                                                            |          |                                                 | 2.92      |
| 7   | GAK    |         | O14976 | Direct Binding      | GAK_HUMAN Cyclin-G-associated kinase                                                                            |          |                                                 | 2.94      |

|     |        |        |                        |                                                                     |          |                                                               |       |
|-----|--------|--------|------------------------|---------------------------------------------------------------------|----------|---------------------------------------------------------------|-------|
| 41  | GAPDH  | P04406 | direct binding         | G3P_HUMAN Glyceraldehyde-3-phosphate dehydrogenase                  |          |                                                               | 2.94  |
| 169 | FKBP4  | Q02790 | indirect               | FKBP4_HUMAN Peptidyl-prolyl cis-trans isomerase FKBP4               |          |                                                               | 3.25  |
| 58  | ERG    | P11308 | direct binding         | ERG_HUMAN Transcriptional regulator ERG                             |          |                                                               | 3.25  |
| 48  | NPM1   | P06748 | direct                 | NPM_HUMAN Nucleophosmin                                             |          |                                                               | 3.49  |
| 39  | NR3C1  | P04150 | direct binding         | GCR_HUMAN Glucocorticoid receptor                                   |          |                                                               | 3.84  |
| 190 | NR5A1  | Q13285 | direct                 | STF1_HUMAN Steroidogenic factor 1                                   |          |                                                               | 3.84  |
| 249 | PSPC1  | Q8WXF1 | direct, coA            | PSPC1_HUMAN Paraspeckle component 1                                 |          |                                                               | 4.14  |
| 46  | RB1    | P06400 | direct                 | RB_HUMAN Retinoblastoma-associated protein                          |          |                                                               | 6.05  |
| 159 | UBE2I  | P63279 | direct binding         | UBC9_HUMAN SUMO-conjugating enzyme UBC9                             |          |                                                               | 7.25  |
| 209 | NONO   | Q15233 | direct, coA/coR        | NONO_HUMAN Non-POU domain-containing octamer-binding protein        |          |                                                               | 10.00 |
| 319 | PA2G4  | Q9UQ80 | direct, coR            | PA2G4_HUMAN Proliferation-associated protein 2G4                    |          |                                                               | 10.00 |
| 162 | PRKDC  | P78527 | indirect binding       | PRKDC_HUMAN DNA-dependent protein kinase catalytic subunit          |          |                                                               | 10.00 |
| 31  | PRPF6  | O94906 | direct binding         | PRP6_HUMAN Pre-mRNA-processing factor 6                             |          |                                                               | 10.00 |
|     | DDX5   |        |                        |                                                                     | 18829551 | Clark EL et al<br>Cancer Res<br>68(19) 7938-46 2008           | 10.00 |
| 71  |        | P17844 | direct binding         | DDX5_HUMAN Probable ATP-dependent RNA helicase DDX5                 |          |                                                               |       |
| 158 | GNB2L1 | P63244 | direct binding         | GBLP_HUMAN Guanine nucleotide-binding protein subunit beta-2-like 1 |          |                                                               | 10.00 |
|     | CDK5   |        |                        |                                                                     | 21799006 | Hsu FN et al<br>J Biol Chem<br>2011 Sep<br>23;286(38):3141-9. | 10.00 |
| 351 |        | Q00535 | direct binding/phospho | Cyclin-dependent kinase 5                                           |          |                                                               |       |

|     |         |       |        |                          |                                                                                         |                |                                                |
|-----|---------|-------|--------|--------------------------|-----------------------------------------------------------------------------------------|----------------|------------------------------------------------|
| 256 | DDX17   |       | Q92841 | direct                   | DDX17_HUMAN Probable ATP-dependent RNA helicase DDX17                                   |                | 10.00                                          |
| 54  | HNRNPA1 |       | P09651 | indirect                 | ROA1_HUMAN Heterogeneous nuclear ribonucleoprotein A1                                   |                | 10.00                                          |
| 231 | ATAD2   |       | Q6PL18 | direct, coA              | ATAD2_HUMAN ATPase family AAA domain-containing protein 2                               | 20855524       | Unique-AS                                      |
| 195 | CUL4B   |       | Q13620 | indirect binding through | CUL4B_HUMAN Cullin-4B                                                                   |                | Unique-AS                                      |
| 226 | EFCAB6  |       | Q5THR3 | direct, coA              | EFCB6_HUMAN EF-hand calcium-binding domain-containing protein 6                         |                | Unique-AS                                      |
| 185 | EP300   |       | Q09472 | direct                   | EP300_HUMAN Histone acetyltransferase p300                                              |                | Unique-AS                                      |
| 51  | HSPA1A  |       | P08107 | direct                   | HSP71_HUMAN Heat shock 70 kDa protein 1A/1B                                             |                | Unique-AS                                      |
| 269 | RBM14   |       | Q96PK6 | direct                   | RBM14_HUMAN RNA-binding protein 14                                                      |                | Unique-AS                                      |
| 233 | SRCAP   |       | Q6ZRS2 | direct, affinity capture | SRCAP_HUMAN Helicase SRCAP                                                              |                | Unique-AS                                      |
| 334 | ARD1    | NAA10 | P41227 | direct binding           | NAA10 N(alpha)-acetyltransferase 10, NatA catalytic subunit                             | PMID: 22315407 | Unique-AS                                      |
| 8   | HNRPDL  |       | O14979 | coA                      | HNRDL_HUMAN Heterogeneous nuclear ribonucleoprotein D-like                              |                | Unique-AS                                      |
| 265 | PAWR    |       | Q96IZ0 | direct, coA              | PAWR_HUMAN PRKC apoptosis WT1 regulator protein                                         |                | Unique-AS                                      |
| 82  | SFPQ    |       | P23246 | direct binding           | SFPQ_HUMAN Splicing factor, proline- and glutamine-rich                                 |                | Unique-AS                                      |
| 181 | KHDRBS1 |       | Q07666 | direct binding           | KHDR1_HUMAN KH domain-containing, RNA-binding, signal transduction-associated protein 1 |                | Unique-AS                                      |
| 165 | CDK6    |       | Q00534 | direct binding           | CDK6_HUMAN Cell division protein kinase 6                                               |                | Unique-AS                                      |
| 129 | CDK7    |       | P50613 | direct binding           | CDK7_HUMAN Cell division protein kinase 7                                               | 21157430       | Chymkowitz P et al<br>EMBO J 2011<br>Unique-AS |
| 104 | CTNNB1  |       | P35222 | direct binding           | CTNB1_HUMAN Catenin beta-1                                                              |                | Unique-AS                                      |
| 88  | DNAJB1  |       | P25685 | direct binding           | DNJB1_HUMAN DnaJ homolog subfamily B member 1                                           |                | Unique-AS                                      |



|     |        |        |                  |                                                                           |           |
|-----|--------|--------|------------------|---------------------------------------------------------------------------|-----------|
| 196 | DYRK1A | Q13627 | indirect         | DYR1A_HUMAN Dual specificity tyrosine-phosphorylation-regulated kinase 1A | Unique-AS |
| 290 | ENY2   | Q9NPA8 | coA              | ENY2_HUMAN Enhancer of yellow 2 transcription factor homolog              | Unique-AS |
| 106 | GTF2F1 | P35269 | direct binding   | T2FA_HUMAN General transcription factor IIF subunit 1                     | Unique-AS |
| 247 | HDAC7  | Q8WUI4 | direct, coR      | HDAC7_HUMAN Histone deacetylase 7                                         | Unique-AS |
| 53  | HMGB1  | P09429 | direct binding   | HMGB1_HUMAN High mobility group protein B1                                | Unique-AS |
| 89  | HMGB2  | P26583 | direct binding   | HMGB2_HUMAN High mobility group protein B2                                | Unique-AS |
| 20  | KDM1A  | O60341 | direct binding   | KDM1A_HUMAN Lysine-specific histone demethylase 1A (LSD1)                 | Unique-AS |
| 229 | KDM4D  | Q6B0I6 | direct, coA      | KDM4D_HUMAN Lysine-specific demethylase 4D                                | Unique-AS |
| 309 | KDM5B  | Q9UGL1 | direct, coA      | KDM5B_HUMAN Lysine-specific demethylase 5B                                | Unique-AS |
| 307 | RNF14  | Q9UBS8 | direct, coA      | RNF14_HUMAN E3 ubiquitin-protein ligase RNF14                             | Unique-AS |
| 110 | SREBF1 | P36956 | direct binding   | SRBP1_HUMAN Sterol regulatory element-binding protein 1                   | Unique-AS |
| 182 | TNK2   | Q07912 | direct           | ACK1_HUMAN Activated CDC42 kinase 1                                       | Unique-AS |
| 228 | TRIM68 | Q6AZZ1 | direct, coA      | TRI68_HUMAN E3 ubiquitin-protein ligase TRIM68                            | Unique-AS |
| 202 | USP10  | Q14694 | direct           | UBP10_HUMAN Ubiquitin carboxyl-terminal hydrolase 10                      | Unique-AS |
| 278 | WDR77  | Q9BQA1 | direct, coA      | MEP50_HUMAN Methylosome protein 50                                        | Unique-AS |
| 34  | WHSC1  | O96028 | direct binding   | NSD2_HUMAN Probable histone-lysine N-methyltransferase NSD2               | Unique-AS |
| 275 | PRMT1  | Q99873 | indirect, coA    | ANM1_HUMAN Protein arginine N-methyltransferase 1                         | -1.91     |
| 99  | DNAJA1 | P31689 | indirect binding | DNJA1_HUMAN Dnaj homolog subfamily A member 1                             | -1.88     |
| 243 | ARID1B | Q8NFD5 | coA              | ARI1B_HUMAN AT-rich interactive domain-containing protein 1B              | -1.54     |



|     |          |                        |                         |                                                                            |               |          |                                                             |    |
|-----|----------|------------------------|-------------------------|----------------------------------------------------------------------------|---------------|----------|-------------------------------------------------------------|----|
| 6   | ADAM10   | O14672                 | Direct Binding          | ADA10_HUMAN Disintegrin and metalloproteinase domain-containing protein 10 | Arima T et al | 17727679 | Cancer Sci                                                  | NA |
| 183 | AES      | Q08117                 | direct                  | AES_HUMAN Amino-terminal enhancer of split                                 |               |          |                                                             | NA |
| 109 | AHR      | P35869                 | direct binding          | AHR_HUMAN Aryl hydrocarbon receptor                                        |               |          |                                                             | NA |
| 100 | AKT1     | P31749                 | direct binding          | AKT1_HUMAN RAC-alpha serine/threonine-protein kinase                       |               |          |                                                             | NA |
| 250 | APPBP2   | Q92624                 | direct, coR             | APPBP2_HUMAN Amyloid protein-binding protein 2                             |               |          |                                                             | NA |
| 140 | ARHGDI1A | P52565                 | enhance AR transcripti  | inhibitor 1                                                                |               |          |                                                             | NA |
| 3   | ARID1A   | O14497                 | coA                     | ARI1A_HUMAN AT-rich interactive domain-containing protein 1A               |               |          |                                                             | NA |
| 171 | ARID5A   | Q03989                 | direct                  | ARI5A_HUMAN AT-rich interactive domain-containing protein 5A               |               |          |                                                             | NA |
| 204 | ARRB2    | Q14865                 | direct                  | ARI5B_HUMAN AT-rich interactive domain-containing protein 5B               |               |          |                                                             | NA |
| 68  | ATF2     | P15336                 | direct binding          | ATF2_HUMAN Cyclic AMP-dependent transcription factor ATF-2                 |               |          |                                                             | NA |
|     | ATF3     |                        |                         |                                                                            |               | 22665497 | Wang H., et al Mol Cell Biol 2012 Jun 4 Epub ahead of print | NA |
| 346 |          | <a href="#">P18847</a> | direct binding/corepres | Activating transcription factor (ATF3)                                     |               |          |                                                             | NA |
| 206 | ATXN7L3  | Q14CW9                 | direct, coA             | AT7L3_HUMAN Ataxin-7-like protein 3                                        |               |          |                                                             | NA |
| 276 | BAG1     | Q99933                 | direct, coA             | BAG1_HUMAN BAG family molecular chaperone regulator 1                      |               |          |                                                             | NA |
| 111 | BRCA1    | P38398                 | direct binding          | BRCA1_HUMAN Breast cancer type 1 susceptibility protein                    |               |          |                                                             | NA |
| 135 | BRCA2    | P51587                 | direct binding          | BRCA2_HUMAN Breast cancer type 2 susceptibility protein                    |               |          |                                                             | NA |
| 291 | BRD7     | Q9NPI1                 | coR                     | BRD7_HUMAN Bromodomain-containing protein 7                                |               |          |                                                             | NA |
| 301 | CALCOCO1 | Q9P1Z2                 | indirect, coA           | CACO1_HUMAN Calcium-binding and coiled-coil domain-containing protein 1    |               |          |                                                             | NA |
| 155 | CALM1    | P62158                 | direct binding          | CALM_HUMAN Calmodulin                                                      |               |          |                                                             | NA |
| 94  | CASP1    | P29466                 | direct binding          | CASP1_HUMAN Caspase-1                                                      |               |          |                                                             | NA |
| 119 | CASP3    | P42574                 | direct binding          | CASP3_HUMAN Caspase-3                                                      |               |          |                                                             | NA |
| 142 | CASP7    | P55210                 | direct binding          | CASP7_HUMAN Caspase-7                                                      |               |          |                                                             | NA |

|     |         |        |                         |                                                                                         |          |    |
|-----|---------|--------|-------------------------|-----------------------------------------------------------------------------------------|----------|----|
| 203 | CASP8   | Q14790 | direct                  | CASP8_HUMAN Caspase-8                                                                   |          | NA |
| 170 | CAV1    | Q03135 | direct                  | CAV1_HUMAN Caveolin-1                                                                   |          | NA |
| 85  | CCND1   | P24385 | direct binding          | CCND1_HUMAN G1/S-specific cyclin-D1                                                     |          | NA |
| 96  | CCND3   | P30281 | direct binding          | CCND3_HUMAN G1/S-specific cyclin-D3                                                     |          | NA |
| 86  | CCNE1   | P24864 | direct binding          | CCNE1_HUMAN G1/S-specific cyclin-E1                                                     |          | NA |
| 139 | CCNH    | P51946 | direct binding          | CCNH_HUMAN Cyclin-H                                                                     |          | NA |
| 97  | CDC25A  | P30304 | direct binding/corepres | MPIP1_HUMAN M-phase inducer phosphatase 1                                               | 19013180 | NA |
| 98  | CDC25B  | P30305 | direct binding          | MPIP2_HUMAN M-phase inducer phosphatase 2                                               |          | NA |
| 320 | CDK11A  | Q9UQ88 | coA                     | CD11A_HUMAN Cell division protein kinase 11A                                            |          | NA |
| 4   | CDK2AP1 | O14519 | coA                     | CDKA1_HUMAN Cyclin-dependent kinase 2-associated protein 1                              |          | NA |
| 131 | CDK9    | P50750 | direct binding          | CDK9_HUMAN Cell division protein kinase 9                                               |          | NA |
| 125 | CEBPA   | P49715 | direct binding          | CEBPA_HUMAN CCAAT/enhancer-binding protein alpha                                        |          | NA |
| 70  | CEBPB   | P17676 | direct binding          | CEBPB_HUMAN CCAAT/enhancer-binding protein beta                                         |          | NA |
| 268 | CMTM3   | Q96MX0 | coR                     | CKLF3_HUMAN CKLF-like MARVEL transmembrane domain-containing protein 3                  |          | NA |
| 248 | COBRA1  | Q8WX92 | direct, coR             | NELFB_HUMAN Negative elongation factor B                                                |          | NA |
| 258 | COPS5   | Q92905 | coA                     | CSN5_HUMAN COP9 signalosome complex subunit 5                                           |          | NA |
| 57  | COX5B   | P10606 | direct binding          | COX5B_HUMAN Cytochrome c oxidase subunit 5B, mitochondrial                              |          | NA |
| 252 | CREBBP  | Q92793 | direct, coA             | CBP_HUMAN CREB-binding protein                                                          |          | NA |
| 5   | CTDSP2  | O14595 | Direct Binding          | CTDS2_HUMAN Carboxy-terminal domain RNA polymerase II polypeptide A small phosphatase 2 |          | NA |
| 312 | DACH1   | Q9UI36 | coR                     | DACH1_HUMAN Dachshund homolog 1                                                         |          | NA |
| 132 | DAP3    | P51398 | direct binding          | RT29_HUMAN 28S ribosomal protein S29, mitochondrial                                     |          | NA |
| 308 | DAXX    | Q9UER7 | direct, coR             | DAXX_HUMAN Death domain-associated protein 6                                            | 15572661 | NA |
| 224 | DCAF6   | Q58WW2 | direct, coA             | DCAF6_HUMAN DDB1- and CUL4-associated factor 6                                          |          | NA |

|     |         |                        |                           |                                                          |                                                                     |                                                                                            |    |
|-----|---------|------------------------|---------------------------|----------------------------------------------------------|---------------------------------------------------------------------|--------------------------------------------------------------------------------------------|----|
|     | DDB2    |                        |                           |                                                          | 22846800                                                            | Chang SW<br>et al Int J<br>Biochem Cell<br>Biolo 2012<br>July 28 Epub<br>ahead of<br>print | NA |
| 348 |         | <a href="#">Q92466</a> | direct, target for degrac | DNA damage-binding protein 2                             |                                                                     |                                                                                            | NA |
| 78  | DDC     | P20711                 | direct binding            | DDC_HUMAN Aromatic-L-amino-acid<br>decarboxylase         |                                                                     |                                                                                            | NA |
| 230 | DENND5A | Q6IQ26                 | direct, y-2-hybrid        | DEN5A_HUMAN DENN domain-<br>containing protein 5A        |                                                                     |                                                                                            | NA |
|     | E2F3    |                        |                           |                                                          | Mallik I et al.<br>Biochim Biophys<br>Acta 1783:1737-<br>1744, 2008 |                                                                                            | NA |
| 332 |         | O00716                 | direct/indirect           | Cell cycle regulator, transcription factor<br>E2F3       |                                                                     |                                                                                            | NA |
| 35  | EGFR    | P00533                 | direct binding            | EGFR_HUMAN Epidermal growth factor<br>receptor           |                                                                     |                                                                                            | NA |
| 73  | EGR1    | P18146                 | direct binding            | EGR1_HUMAN Early growth response<br>protein 1            |                                                                     |                                                                                            | NA |
| 42  | ERBB2   | P04626                 | indirect binding          | ERBB2_HUMAN Receptor tyrosine-<br>protein kinase erbB-2  |                                                                     |                                                                                            | NA |
| 37  | ESR1    | P03372                 | direct binding            | ESR1_HUMAN Estrogen receptor                             |                                                                     |                                                                                            | NA |
| 67  | ETS1    | P14921                 | direct binding            | ETS1_HUMAN Protein C-ets-1                               |                                                                     |                                                                                            | NA |
| 128 | ETV1    | P50549                 | direct binding            | ETV1_HUMAN ETS translocation<br>variant 1                |                                                                     |                                                                                            | NA |
| 115 | ETV5    | P41161                 | direct binding            | ETV5_HUMAN ETS translocation<br>variant 5                |                                                                     |                                                                                            | NA |
|     | FHL2    |                        |                           |                                                          | 17975004                                                            | Heemers<br>HV, et al<br>Cancer<br>Res2007                                                  | NA |
| 200 |         | Q14192                 | direct                    | FHL2_HUMAN Four and a half LIM<br>domains protein 2      |                                                                     |                                                                                            | NA |
| 191 | FKBP5   | Q13451                 | indirect                  | FKBP5_HUMAN Peptidyl-prolyl cis-trans<br>isomerase FKBP5 |                                                                     |                                                                                            | NA |
| 36  | FOS     | P01100                 | direct binding            | FOS_HUMAN Proto-oncogene c-Fos                           |                                                                     |                                                                                            | NA |
| 144 | FOXA1   | P55317                 | direct binding            | FOXA1_HUMAN Hepatocyte nuclear<br>factor 3-alpha         |                                                                     |                                                                                            | NA |
| 322 | FOXA2   | Q9Y261                 | direct, coA/coR           | FOXA2_HUMAN Hepatocyte nuclear<br>factor 3-beta          |                                                                     |                                                                                            | NA |
| 143 | FOXG1   | P55316                 | direct binding            | FOXG1_HUMAN Forkhead box protein<br>G1                   |                                                                     |                                                                                            | NA |
| 28  | FOXH1   | O75593                 | direct binding            | FOXH1_HUMAN Forkhead box protein<br>H1                   |                                                                     |                                                                                            | NA |
| 187 | FOXO1   | Q12778                 | direct                    | FOXO1_HUMAN Forkhead box protein<br>O1                   |                                                                     |                                                                                            | NA |

|     |            |        |                |                                                                                   |          |                                                    |    |
|-----|------------|--------|----------------|-----------------------------------------------------------------------------------|----------|----------------------------------------------------|----|
| 14  | FOXO3      | O43524 | Direct Binding | FOXO3_HUMAN Forkhead box protein O3                                               |          |                                                    | NA |
| 284 | FOXP1      | Q9H334 | direct, coR    | FOXP1_HUMAN Forkhead box protein P1                                               |          |                                                    | NA |
| 244 | GADD45GIP1 | Q8TAE8 | direct, coR    | G45IP_HUMAN Growth arrest and DNA damage-inducible proteins-interacting protein 1 |          |                                                    | NA |
|     |            |        |                |                                                                                   |          | He B et al<br>Proc Natl<br>Acad Sci U S<br>A. 2014 |    |
| 83  | GATA2      | P23769 | direct binding | GATA2_HUMAN Endothelial transcription factor GATA-2                               | 25489091 |                                                    | NA |
| 84  | GATA3      | P23771 | coA            | GATA3_HUMAN Trans-acting T-cell-specific transcription factor GATA-3              |          |                                                    | NA |
| 324 | GRIP1      | Q9Y3R0 | direct, coA    | GRIP1_HUMAN Glutamate receptor-interacting protein 1                              |          |                                                    | NA |
| 126 | GSK3A      | P49840 | direct binding | GSK3A_HUMAN Glycogen synthase kinase-3 alpha                                      |          |                                                    | NA |
| 45  | GSN        | P06396 | direct         | GELS_HUMAN Gelsolin                                                               |          |                                                    | NA |
| 64  | GTF2F2     | P13984 | direct binding | T2FB_HUMAN General transcription factor IIF subunit 2                             |          |                                                    | NA |
| 102 | GTF2H1     | P32780 | direct binding | TF2H1_HUMAN General transcription factor IIH subunit 1                            |          |                                                    | NA |
| 141 | HAP1       | P54257 | direct binding | HAP1_HUMAN Huntingtin-associated protein 1                                        |          |                                                    | NA |
| 193 | HDAC1      | Q13547 | direct         | HDAC1_HUMAN Histone deacetylase 1                                                 |          |                                                    | NA |
| 10  | HDAC3      | O15379 | Direct Binding | HDAC3_HUMAN Histone deacetylase 3                                                 |          |                                                    | NA |
| 148 | HDAC4      | P56524 | direct binding | HDAC4_HUMAN Histone deacetylase 4                                                 |          |                                                    | NA |
| 305 | HDAC6      | Q9UBN7 | indirect, coA  | HDAC6_HUMAN Histone deacetylase 6                                                 |          |                                                    | NA |
| 328 | HEY1       | Q9Y5J3 | direct, coR    | HEY1_HUMAN Hairy/enhancer-of-split related with YRPW motif protein 1              |          |                                                    | NA |
| 306 | HEY2       | Q9UBP5 | coR            | HEY2_HUMAN Hairy/enhancer-of-split related with YRPW motif protein 2              |          |                                                    | NA |
| 222 | HIF1A      | Q16665 | direct, coA    | HIF1A_HUMAN Hypoxia-inducible factor 1-alpha                                      |          |                                                    | NA |
| 2   | HIP1       | O00291 | Direct Binding | HIP1_HUMAN Huntingtin-interacting protein 1                                       |          |                                                    | NA |
| 286 | HIPK3      | Q9H422 | direct, coA    | HIPK3_HUMAN Homeodomain-interacting protein kinase 3                              |          |                                                    | NA |

|     |         |                        |                    |                                                                                                   |          |                                                 |
|-----|---------|------------------------|--------------------|---------------------------------------------------------------------------------------------------|----------|-------------------------------------------------|
| 116 | HNF4A   | P41235                 | colocalization     | HNF4A_HUMAN Hepatocyte nuclear factor 4-alpha                                                     |          | NA                                              |
| 253 | HOXB13  | Q92826                 | direct, coR        | HXB13_HUMAN Homeobox protein Hox-B13                                                              |          | NA                                              |
| 280 | HTATIP2 | Q9BUP3                 | coA                | HTAI2_HUMAN Oxidoreductase HTATIP2                                                                |          | NA                                              |
| 65  | IDE     | P14735                 | direct binding     | IDE_HUMAN Insulin-degrading enzyme                                                                |          | NA                                              |
| 223 | IFI16   | Q16666                 | direct, coR        | IF16_HUMAN Gamma-interferon-inducible protein 16                                                  |          | NA                                              |
| 113 | IL6ST   | P40189                 | direct binding     | IL6RB_HUMAN Interleukin-6 receptor subunit beta                                                   |          | NA                                              |
| 107 | IRS1    | P35568                 | direct binding     | IRS1_HUMAN Insulin receptor substrate 1                                                           |          | NA                                              |
| 215 | JMJD1C  | Q15652                 | direct, coA        | JHD2C_HUMAN Probable JmjC domain-containing histone demethylation protein 2C                      |          | NA                                              |
| 44  | JUN     | P05412                 | direct             | JUN_HUMAN Transcription factor AP-1                                                               |          | NA                                              |
|     | JunD    |                        |                    |                                                                                                   | 20460526 | Mehraein-Ghomi F et al Cancer Res 70(11) 4560-8 |
| 341 |         | <a href="#">P17535</a> | directbinding/coA  | Transcription factor jun-D                                                                        |          | NA                                              |
| 254 | KAT2A   | Q92830                 | coA                | KAT2A_HUMAN Histone acetyltransferase KAT2A                                                       |          | NA                                              |
| 255 | KAT2B   | Q92831                 | direct, coA        | KAT2B_HUMAN Histone acetyltransferase KAT2B                                                       |          | NA                                              |
| 333 | KAT7    | MYST2                  | direct binding     | KAT7_HUMAN Histone acetyltransferase                                                              |          | NA                                              |
| 326 | KDM3A   | Q9Y4C1                 | direct, coA        | KDM3A_HUMAN Lysine-specific demethylase 3A                                                        |          | NA                                              |
| 24  | KDM4A   | O75164                 | direct binding     | KDM4A_HUMAN Lysine-specific demethylase 4A (JMJD2A)                                               |          | NA                                              |
| 285 | KDM4C   | Q9H3R0                 | direct, coA        | KDM4C_HUMAN Lysine-specific demethylase 4C                                                        |          | NA                                              |
|     |         |                        |                    |                                                                                                   |          | Lu Y et al Cell Signal. 2012 Nov; 25(2):479-489 |
| 350 | L1RE1   | LINE-1 ORQ9UN81        | direct binding/coA | The pro-oncogene human Long Interspersed Nucleotide acid Element-1 (LINE-1) encodes LINE-1 ORF-1p | 23153584 | NA                                              |
| 295 | LATS2   | Q9NRM7                 | direct, coR        | LATS2_HUMAN Serine/threonine-protein kinase LATS2                                                 |          | NA                                              |
| 336 | LCOR    | <a href="#">Q96JN0</a> | direct binding     | Ligand-dependent corepressor                                                                      | 21856747 | NA                                              |
| 22  | LPXN    | O60711                 | direct binding     | LPXN_HUMAN Leupaxin                                                                               |          | NA                                              |

|     |         |        |                          |                                                                                 |          |  |                                         |    |
|-----|---------|--------|--------------------------|---------------------------------------------------------------------------------|----------|--|-----------------------------------------|----|
| 277 | MACROD1 | Q9BQ69 | direct, coA              | MACD1_HUMAN MACRO domain-containing protein 1                                   |          |  | Bai S, and Wilson EM Mol Cell Biol 2008 | NA |
| 120 | MAGEA11 | P43364 | direct binding           | MAGAB_HUMAN Melanoma-associated antigen 11                                      | 18212060 |  |                                         | NA |
| 79  | MAK     | P20794 | direct binding           | MAK_HUMAN Serine/threonine-protein kinase MAK                                   |          |  |                                         | NA |
| 93  | MAPK1   | P28482 | direct binding           | MK01_HUMAN Mitogen-activated protein kinase 1                                   |          |  |                                         | NA |
| 246 | MAPK15  | Q8TD08 | indirect, coR            | MK15_HUMAN Mitogen-activated protein kinase 15                                  |          |  |                                         | NA |
| 166 | MDM2    | Q00987 | direct binding           | MDM2_HUMAN E3 ubiquitin-protein ligase Mdm2                                     |          |  |                                         | NA |
| 236 | MED12L  | Q86YW9 | direct, y-2-hybrid       | MD12L_HUMAN Mediator of RNA polymerase II transcription subunit 12-like protein |          |  |                                         | NA |
| 19  | MED14   | O60244 | Direct Binding           | MED14_HUMAN Mediator of RNA polymerase II transcription subunit 14              |          |  |                                         | NA |
| 297 | MED17   | Q9NVC6 | coA                      | MED17_HUMAN Mediator of RNA polymerase II transcription subunit 17              |          |  |                                         | NA |
| 26  | MED24   | O75448 | direct binding           | MED24_HUMAN Mediator of RNA polymerase II transcription subunit 24              |          |  |                                         | NA |
| 311 | MKRN1   | Q9UHC7 | coR                      | MKRN1_HUMAN E3 ubiquitin-protein ligase makorin-1                               |          |  |                                         | NA |
| 310 | MLH3    | Q9UHC1 | direct, y-2-hybrid       | MLH3_HUMAN DNA mismatch repair protein Mlh3                                     |          |  |                                         | NA |
| 279 | MYBBP1A | Q9BQG0 | direct                   | MBB1A_HUMAN Myb-binding protein 1A                                              |          |  |                                         | NA |
| 216 | NCOA1   | Q15788 | direct, coA              | NCOA1_HUMAN Nuclear receptor coactivator 1                                      |          |  |                                         | NA |
| 330 | NCOA3   | Q9Y6Q9 | direct, coA              | NCOA3_HUMAN Nuclear receptor coactivator 3                                      |          |  |                                         | NA |
| 197 | NCOA4   | Q13772 | direct                   | NCOA4_HUMAN Nuclear receptor coactivator 4                                      |          |  |                                         | NA |
| 201 | NCOA6   | Q14686 | indirect                 | NCOA6_HUMAN Nuclear receptor coactivator 6                                      |          |  |                                         | NA |
| 329 | NCOR2   | Q9Y618 | direct, coR              | NCOR2_HUMAN Nuclear receptor corepressor 2                                      |          |  |                                         | NA |
| 205 | NFIX    | Q14938 | direct, coA              | NFIX_HUMAN Nuclear factor 1 X-type                                              |          |  |                                         | NA |
| 75  | NFKB1   | P19838 | interact with p65, p52 r | NFKB1_HUMAN Nuclear factor NF-kappa-B p105 subunit                              |          |  |                                         | NA |
| 303 | NLK     | Q9UBE8 | direct, coR              | NLK_HUMAN Serine/threonine-protein kinase NLK                                   |          |  |                                         | NA |



|     |        |        |                    |                                                                  |                |                                       |
|-----|--------|--------|--------------------|------------------------------------------------------------------|----------------|---------------------------------------|
| 234 | NLRP10 | Q86W26 | direct, y-2-hybrid | NAL10_HUMAN NACHT, LRR and PYD domains-containing protein 10     |                | NA                                    |
| 138 | NR0B1  | P51843 | direct binding     | NR0B1_HUMAN Nuclear receptor subfamily 0 group B member 1        |                | NA                                    |
| 210 | NR0B2  | Q15466 | direct, coR        | NR0B2_HUMAN Nuclear receptor subfamily 0 group B member 2        |                | NA                                    |
| 63  | NR2C1  | P13056 | direct binding     | NR2C1_HUMAN Nuclear receptor subfamily 2 group C member 1        |                | NA                                    |
| 124 | NR2C2  | P49116 | direct binding     | NR2C2_HUMAN Nuclear receptor subfamily 2 group C member 2        |                | NA                                    |
| 294 | PAK6   | Q9NQU5 | direct, coR        | PAK6_HUMAN Serine/threonine-protein kinase PAK 6                 |                | NA                                    |
| 288 | PATZ1  | Q9HBE1 | indirect, coR      | PATZ1_HUMAN POZ-, AT hook-, and zinc finger-containing protein 1 |                | NA                                    |
|     | PAX6   |        |                    |                                                                  | 21935435       | Elvenes J et al PLoS One 6(9) 2011 NA |
| 338 |        | P26367 | directbinding/coR  | paired box protein Pax6                                          |                | NA                                    |
| 238 | PELP1  | Q8IZL8 | direct, coA        | PELP1_HUMAN Proline-, glutamic acid- and leucine-rich protein 1  |                | NA                                    |
| 105 | PHB    | P35232 | indirect binding   | PHB_HUMAN Prohibitin                                             |                | NA                                    |
| 29  | PIAS1  | O75925 | direct binding     | PIAS1_HUMAN E3 SUMO-protein ligase PIAS1                         |                | NA                                    |
| 30  | PIAS2  | O75928 | direct binding     | PIAS2_HUMAN E3 SUMO-protein ligase PIAS2                         |                | NA                                    |
| 331 | PIAS3  | Q9Y6X2 | direct, coA/coR    | PIAS3_HUMAN E3 SUMO-protein ligase PIAS3                         |                | NA                                    |
| 240 | PIAS4  | Q8N2W9 | direct, coR        | PIAS4_HUMAN E3 SUMO-protein ligase PIAS4                         |                | NA                                    |
| 335 | PIM1   | P11309 | direct binding     | Serine/threonine-protein kinase pim-1                            | PMID: 22584579 | NA                                    |
| 220 | PKN1   | Q16512 | direct, coA        | PKN1_HUMAN Serine/threonine-protein kinase N1                    |                | NA                                    |
| 317 | PLAGL1 | Q9UM63 | direct, coA        | PLAL1_HUMAN Zinc finger protein PLAGL1                           |                | NA                                    |
| 262 | PMEPA1 | Q969W9 | direct             | PMEPA_HUMAN Transmembrane prostate androgen-induced protein      |                | NA                                    |
| 188 | PNRC1  | Q12796 | direct             | PNRC1_HUMAN Proline-rich nuclear receptor coactivator 1          |                | NA                                    |
| 292 | PNRC2  | Q9NPJ4 | direct             | PNRC2_HUMAN Proline-rich nuclear receptor coactivator 2          |                | NA                                    |
| 66  | POU2F1 | P14859 | direct binding     | PO2F1_HUMAN POU domain, class 2, transcription factor 1 (Oct1)   |                | NA                                    |
| 52  | POU2F2 | P09086 | direct binding     | PO2F2_HUMAN POU domain, class 2, transcription factor 2          |                | NA                                    |

|     |         |                                   |                    |                                                                                               |          |                                                    |
|-----|---------|-----------------------------------|--------------------|-----------------------------------------------------------------------------------------------|----------|----------------------------------------------------|
| 77  | POU3F3  | P20264                            | direct biniding    | PO3F3_HUMAN POU domain, class 3, transcription factor 3                                       |          | NA                                                 |
| 184 | PPID    | Q08752                            | direct             | PPID_HUMAN Peptidyl-prolyl cis-trans isomerase D                                              |          | NA                                                 |
| 154 | PPP1CA  | P62136                            | direct bindng      | PP1A_HUMAN Serine/threonine-protein phosphatase PP1-alpha catalytic subunit                   |          | NA                                                 |
| 23  | PQBP1   | O60828                            | Direct Binding     | PQBP1_HUMAN Polyglutamine-binding protein 1                                                   |          | NA                                                 |
| 345 | PRGC1   | PPARGC1<br><a href="#">Q9UBK2</a> | direct binding/coA | Peroxisome proliferator-activated receptor gamma coactivator 1-alpha                          | 19884383 | Shiota M., et al Mol Endocrinol 24(1):114-27 NA    |
| 282 | PRIC285 | Q9BYK8                            | coA                | PR285_HUMAN Peroxisomal proliferator-activated receptor A-interacting complex 285 kDa protein |          | NA                                                 |
| 146 | PRMT2   | P55345                            | direct binding     | ANM2_HUMAN Protein arginine N-methyltransferase 2                                             |          | NA                                                 |
| 302 | PSMC3IP | Q9P2W1                            | direct, coA        | HOP2_HUMAN Homologous-pairing protein 2 homolog                                               | 19325002 | Satoh T et al Endocrinology 150(7) 3283-90 2009 NA |
| 123 | PXN     | P49023                            | direct binding     | PAXI_HUMAN Paxillin                                                                           |          | NA                                                 |
| 151 | RAC3    | P60763                            | direct binding     | RAC3_HUMAN Ras-related C3 botulinum toxin substrate 3                                         |          | NA                                                 |
| 325 | RAD54L2 | Q9Y4B4                            | direct, coA        | ARIP4_HUMAN Helicase ARIP4                                                                    | 17003240 | Domanskyi A et al Am J Physiol Metab 2007 NA       |
| 273 | RAD9A   | Q99638                            | direct, coR        | RAD9A_HUMAN Cell cycle checkpoint control protein RAD9A                                       |          | NA                                                 |
| 38  | RAF1    | P04049                            | direct binding     | RAF1_HUMAN RAF proto-oncogene serine/threonine-protein kinase                                 |          | NA                                                 |
| 156 | RAN     | P62826                            | direct binding     | RAN_HUMAN GTP-binding nuclear protein Ran                                                     | 18565325 | Harada N et al 373(3) 373-7 2008 NA                |
| 232 | RANBP10 | Q6VN20                            | direct, coA        | RBP10_HUMAN Ran-binding protein 10                                                            |          | NA                                                 |
| 271 | RANBP9  | Q96S59                            | direct, coA        | RANB9_HUMAN Ran-binding protein 9                                                             |          | NA                                                 |
| 299 | RBAK    | Q9NYW8                            | direct, coA        | RBAK_HUMAN RB-associated KRAB zinc finger protein                                             |          | NA                                                 |

|     |         |        |                        |                                                                                 |          |                                             |    |
|-----|---------|--------|------------------------|---------------------------------------------------------------------------------|----------|---------------------------------------------|----|
| 270 | RCHY1   | Q96PM5 | direct, coA            | ZN363_HUMAN RING finger and CHY zinc finger domain-containing protein 1 (PIRH2) | 16914734 | Logan IR et al., Mol Cell Biol 2006         | NA |
| 173 | REL     | Q04864 | direct                 | REL_HUMAN Proto-oncogene c-Rel                                                  |          |                                             | NA |
| 172 | RELA    | Q04206 | direct                 | TF65_HUMAN Transcription factor p65 RN5A_HUMAN 2-5A-dependent ribonuclease      |          |                                             | NA |
| 178 | RNASEL  | Q05823 | direct                 |                                                                                 |          |                                             | NA |
| 161 | RNF4    | P78317 | direct binding         | RNF4_HUMAN RING finger protein 4                                                |          |                                             | NA |
| 137 | RPS6KA3 | P51812 | modulate PSA express   | KS6A3_HUMAN Ribosomal protein S6 kinase alpha-3                                 |          |                                             | NA |
|     | RREB1   |        |                        |                                                                                 | 17550981 | Mukhopadhyay NK et al Mol Endocrinol 2007   | NA |
| 251 |         | Q92766 | direct, coR            | RREB1_HUMAN Ras-responsive element-binding protein 1                            |          |                                             | NA |
| 167 | RUNX1   | Q01196 | direct binding         | RUNX1_HUMAN Runt-related transcription factor 1                                 |          |                                             | NA |
| 198 | RUNX2   | Q13950 | direct                 | RUNX2_HUMAN Runt-related transcription factor 2                                 |          |                                             | NA |
|     | RWDD1   |        |                        |                                                                                 | 22406838 | Grotsch H et al Mol Cell Endocrinol 2012    | NA |
| 287 |         | Q9H446 | coA                    | RWDD1_HUMAN RWD domain-containing protein 1                                     |          |                                             | NA |
| 74  | RXRA    | P19793 | direct binding         | RXRA_HUMAN Retinoic acid receptor RXR-alpha                                     |          |                                             | NA |
| 207 | SART3   | Q15020 | direct, coR            | SART3_HUMAN Squamous cell carcinoma antigen recognized by T-cells 3             |          |                                             | NA |
|     | SET9    | SETD7  |                        |                                                                                 | 21273441 | Ko S et al Mol Endocrinol 25(3):433-44 2011 | NA |
| 340 |         | Q8WTS6 | directbinding/coA      | Histone-lysine N-methyltransferase SETD7 (SET9)                                 |          |                                             | NA |
| 241 | SFRP1   | Q8N474 | coR                    | SFRP1_HUMAN Secreted frizzled-related protein 1                                 |          |                                             | NA |
| 1   | SGK1    | O00141 | coR, no direct binding | SGK1_HUMAN Serine/threonine-protein kinase Sgk1                                 |          |                                             | NA |
| 263 | SIRT1   | Q96EB6 | direct, coR            | SIRT1_HUMAN NAD-dependent deacetylase sirtuin-1                                 |          |                                             | NA |
| 59  | SLC25A4 | P12235 | direct binding (y-2-h) | ADT1_HUMAN ADP/ATP translocase 1                                                |          |                                             | NA |

|     |         |                        |                        |                                                                                                                    |          |                                                                            |    |
|-----|---------|------------------------|------------------------|--------------------------------------------------------------------------------------------------------------------|----------|----------------------------------------------------------------------------|----|
|     | SLUG    | SNAI2                  |                        |                                                                                                                    | 22745193 | Wu K., et al<br>Mol<br>Endocrinol<br>2012 Jun 28<br>Epub ahead<br>of print | NA |
| 347 |         | <a href="#">O43623</a> | coactivator            | Zinc finger protein SNAI2                                                                                          |          |                                                                            | NA |
| 217 | SMAD1   | Q15797                 | direct, coR            | SMAD1_HUMAN Mothers against<br>decapentaplegic homolog 1                                                           |          |                                                                            | NA |
| 164 | SMAD3   | P84022                 | direct binding         | SMAD3_HUMAN Mothers against<br>decapentaplegic homolog 3                                                           |          |                                                                            | NA |
| 192 | SMAD4   | Q13485                 | direct                 | SMAD4_HUMAN Mothers against<br>decapentaplegic homolog 4                                                           |          |                                                                            | NA |
| 133 | SMARCA2 | P51531                 | imapct AR-mediated tr: | SMCA2_HUMAN Probable global<br>transcription activator SNF2L2                                                      |          |                                                                            | NA |
| 134 | SMARCA4 | P51532                 | imapct AR-mediated tr: | SMCA4_HUMAN Transcription activator<br>BRG1                                                                        |          |                                                                            | NA |
| 259 | SMARCC1 | Q92922                 | direct, coA            | SMRC1_HUMAN SWI/SNF complex<br>subunit SMARCC1                                                                     |          |                                                                            | NA |
|     | SMARCE1 |                        |                        | SMCE1_HUMAN SWI/SNF-related<br>matrix-associated actin-dependent<br>regulator of chromatin subfamily E<br>member 1 |          |                                                                            | NA |
| 261 |         | Q969G3                 | direct, coA            | SODM_HUMAN Superoxide dismutase<br>[Mn], mitochondrial                                                             |          |                                                                            | NA |
| 40  | SOD2    | P04179                 | coR, no direct binding | VINEX_HUMAN Vinexin                                                                                                |          |                                                                            | NA |
| 21  | SORBS3  | O60504                 | direct binding         | SOX9_HUMAN Transcription factor SOX-<br>9                                                                          |          |                                                                            | NA |
| 121 | SOX9    | P48436                 | direct binding         | SP1_HUMAN Transcription factor Sp1                                                                                 |          |                                                                            | NA |
| 50  | SP1     | P08047                 | direct                 |                                                                                                                    |          |                                                                            | NA |
|     | SPBP    | TCF20                  |                        |                                                                                                                    | 21935435 | Elvenes J et<br>al PLoS One<br>6(9) 2011                                   | NA |
| 339 |         | <a href="#">Q9UGU0</a> | directbinding/coA      | transcription factor 20                                                                                            |          |                                                                            | NA |
| 32  | SPDEF   | O95238                 | direct binding         | SPDEF_HUMAN SAM pointed domain-<br>containing Ets transcription factor                                             |          |                                                                            | NA |
| 18  | SPOP    | O43791                 | Direct Binding (y-2-h) | SPOP_HUMAN Speckle-type POZ<br>protein                                                                             |          |                                                                            | NA |
| 289 | SRA1    | Q9HD15                 | direct, coA/coR        | SRA1_HUMAN Steroid receptor RNA<br>activator 1                                                                     |          |                                                                            | NA |
| 60  | SRC     | P12931                 | direct binding         | SRC_HUMAN Proto-oncogene tyrosine-<br>protein kinase Src                                                           |          |                                                                            | NA |
| 175 | SRY     | Q05066                 | direct                 | SRY_HUMAN Sex-determining region Y<br>protein                                                                      |          |                                                                            | NA |
| 117 | STAT5A  | P42229                 | direct binding         | STA5A_HUMAN Signal transducer and<br>activator of transcription 5A                                                 |          |                                                                            | NA |

|     |         |        |                         |                                                                            |          |                                                |
|-----|---------|--------|-------------------------|----------------------------------------------------------------------------|----------|------------------------------------------------|
| 136 | STAT5B  | P51692 | direct binding          | STA5B_HUMAN Signal transducer and activator of transcription 5B            |          | NA                                             |
| 157 | SUMO1   | P63165 | coR                     | SUMO1_HUMAN Small ubiquitin-related modifier 1                             |          | NA                                             |
| 153 | SUMO2   | P61956 | coA                     | SUMO2_HUMAN Small ubiquitin-related modifier 2                             |          | NA                                             |
| 27  | TADA3   | O75528 | direct binding          | TADA3_HUMAN Transcriptional adapter 3                                      |          | NA                                             |
|     | TAF1    |        |                         |                                                                            | 20181722 | Tavassoli P et al Mol Endocrinol 24(4) 696-708 |
| 344 |         | P21675 | direct binding/coA      | TATA binding protein-associated factor 1                                   |          | NA                                             |
| 168 | TAGLN   | Q01995 | indirect                | TAGL_HUMAN Transgelin                                                      |          | NA                                             |
| 76  | TBP     | P20226 | direct binding          | TBP_HUMAN TATA-box-binding protein                                         |          | NA                                             |
| 15  | TCF21   | O43680 | Direct Binding          | TCF21_HUMAN Transcription factor 21                                        |          | NA                                             |
| 69  | TCF4    | P15884 | direct binding          | ITF2_HUMAN Transcription factor 4                                          |          | NA                                             |
| 293 | TCF7L2  | Q9NQB0 | direct, coR             | TF7L2_HUMAN Transcription factor 7-like 2                                  |          | NA                                             |
| 194 | TDG     | Q13569 | direct                  | TDG_HUMAN G/T mismatch-specific thymine DNA glycosylase                    |          | NA                                             |
| 13  | TGFB111 | O43294 | Direct Binding          | TGFI1_HUMAN Transforming growth factor beta-1-induced transcript 1 protein |          | NA                                             |
| 163 | TMF1    | P82094 | direct binding          | TMF1_HUMAN TATA element modulatory factor                                  |          | NA                                             |
| 130 | TOB1    | P50616 | direct binding          | TOB1_HUMAN Protein Tob1                                                    |          | NA                                             |
| 199 | TOB2    | Q14106 | indirect, coR, suppress | TOB2_HUMAN Protein Tob2                                                    |          | NA                                             |
| 43  | TP53    | P04637 | indirect binding        | P53_HUMAN Cellular tumor antigen p53                                       |          | NA                                             |
| 9   | TRIM24  | O15164 | Direct Binding          | TIF1A_HUMAN Transcription intermediary factor 1-alpha                      |          | NA                                             |
| 214 | TRIP4   | Q15650 | direct, coA             | TRIP4_HUMAN Activating signal cointegrator 1                               |          | NA                                             |
| 245 | UBA3    | Q8TBC4 | indirect, coR           | UBA3_HUMAN NEDD8-activating enzyme E1 catalytic subunit                    |          | NA                                             |
| 55  | UBC     | P0CG48 | ubiquitin               | UBC_HUMAN Polyubiquitin-C                                                  |          | NA                                             |
| 160 | UBE2L3  | P68036 | coA                     | UB2L3_HUMAN Ubiquitin-conjugating enzyme E2 L3                             |          | NA                                             |
| 176 | UBE3A   | Q05086 | direct                  | UBE3A_HUMAN Ubiquitin-protein ligase E3A                                   |          | NA                                             |

|     |        |                                    |                            |                                                                    |          |                                                                     |    |
|-----|--------|------------------------------------|----------------------------|--------------------------------------------------------------------|----------|---------------------------------------------------------------------|----|
| 218 | USF2   | Q15853                             | direct/indirect, coA       | USF2_HUMAN Upstream stimulatory factor 2                           |          |                                                                     | NA |
| 318 | USP22  | Q9UPT9                             | direct, coA                | UBP22_HUMAN Ubiquitin carboxyl-terminal hydrolase 22               |          |                                                                     | NA |
| 281 | USP26  | Q9BXU7                             | direct, affinity capture-v | UBP26_HUMAN Ubiquitin carboxyl-terminal hydrolase 26               |          |                                                                     | NA |
| 304 | UXT    | Q9UBK9                             | direct, coA                | UXT_HUMAN Protein UXT                                              |          |                                                                     | NA |
| 314 | VAV3   | Q9UKW4                             | indirect, coA              | VAV3_HUMAN Guanine nucleotide exchange factor VAV3                 | 21765461 | Rao S et al<br>Oncogene<br>2012                                     | NA |
| 225 | WIP1   | Q5MNZ9                             | direct                     | WIP1_HUMAN WD repeat domain phosphoinositide-interacting protein 1 |          |                                                                     | NA |
| 87  | YY1    | P25490                             | direct binding             | YY1_HUMAN Transcriptional repressor protein YY1                    |          |                                                                     | NA |
| 323 | ZBTB1  | Q9Y2K1                             | direct, y-2-hybrid         | ZBTB1_HUMAN Zinc finger and BTB domain-containing protein 1        |          |                                                                     | NA |
| 177 | ZBTB16 | Q05516                             | direct (y-2-hybrid)        | ZBT16_HUMAN Zinc finger and BTB domain-containing protein 16       |          |                                                                     | NA |
| 242 | ZMIZ2  | Q8NF64                             | direct, coA                | ZMIZ2_HUMAN Zinc finger MIZ domain-containing protein 2            |          |                                                                     | NA |
| 227 | ZNF318 | Q5VUA4                             | direct, coR                | ZN318_HUMAN Zinc finger protein 318                                |          |                                                                     | NA |
| 337 | ZNF366 | DC-SCRIP<br><a href="#">Q8N895</a> | co-IP                      | Zinc finger protein 366                                            | 22473304 | Ansems M et al<br>Prostate<br>Karvonen et al<br>J. Mol Biol<br>2008 | NA |
| 327 | ZNF451 | Q9Y4E5                             | direct/indirect, coA       | ZN451_HUMAN Zinc finger protein 451                                | 18656483 |                                                                     | NA |

| <b>Supplemental Table 3. Summary of siRNA luciferase screen for modulators of AR-mediated transcription.</b> |                                                                                                                                                                                                                                                                                                                                                                                                                                                                                                                                                                                                                                                                                                                                                                                                                                                                                                                                                                                                                                         |               |                                           |  |
|--------------------------------------------------------------------------------------------------------------|-----------------------------------------------------------------------------------------------------------------------------------------------------------------------------------------------------------------------------------------------------------------------------------------------------------------------------------------------------------------------------------------------------------------------------------------------------------------------------------------------------------------------------------------------------------------------------------------------------------------------------------------------------------------------------------------------------------------------------------------------------------------------------------------------------------------------------------------------------------------------------------------------------------------------------------------------------------------------------------------------------------------------------------------|---------------|-------------------------------------------|--|
| <b>E3 ubiquitin protein ligases</b>                                                                          | <b>Description</b>                                                                                                                                                                                                                                                                                                                                                                                                                                                                                                                                                                                                                                                                                                                                                                                                                                                                                                                                                                                                                      | <b>Effect</b> | <b>% increase (+)<br/>or decrease (-)</b> |  |
| NEDD4L                                                                                                       | E3 ubiquitin-protein ligase which accepts ubiquitin from an E2 ubiquitin-conjugating enzyme in the form of a thioester and then directly transfers the ubiquitin to targeted substrates. Inhibits TGF-beta signaling by triggering SMAD2 and TGFBR1 ubiquitination and proteasome-dependent degradation. Promotes ubiquitination and internalization of various plasma membrane channels such as ENaC, Nav1.2, Nav1.3, Nav1.5, Nav1.7, Nav1.8, Kv1.3, EAAT1 or CLC5. Promotes ubiquitination and degradation of SGK1 and TNK2.                                                                                                                                                                                                                                                                                                                                                                                                                                                                                                          | Potentiate    | 48%                                       |  |
| CHFR                                                                                                         | E3 ubiquitin-protein ligase that functions in the antephasic checkpoint by actively delaying passage into mitosis in response to microtubule poisons. Acts in early prophase before chromosome condensation, when the centrosome move apart from each other along the periphery of the nucleus. Probably involved in signaling the presence of mitotic stress caused by microtubule poisons by mediating the 'Lys-48'-linked ubiquitination of target proteins, leading to their degradation by the proteasome. Promotes the ubiquitination and subsequent degradation of AURKA and PLK1. Probably acts as a tumor suppressor, possibly by mediating the polyubiquitination of HDAC1, leading to its degradation. May also promote the formation of 'Lys-63'-linked polyubiquitin chains and functions with the specific ubiquitin-conjugating UBC13-MMS2 (UBE2N-UBE2V2) heterodimer. Substrates that are polyubiquitinated at 'Lys-63' are usually not targeted for degradation, but are rather involved in signaling cellular stress. | Potentiate    | 42%                                       |  |
| PELI1                                                                                                        | E3 ubiquitin ligase catalyzing the covalent attachment of ubiquitin moieties onto substrate proteins. Involved in the TLR and IL-1 signaling pathways via interaction with the complex containing IRAK kinases and TRAF6. Mediates 'Lys-63'-linked polyubiquitination of IRAK1 allowing subsequent NF-kappa-B activation.                                                                                                                                                                                                                                                                                                                                                                                                                                                                                                                                                                                                                                                                                                               | Potentiate    | 48%                                       |  |
| RNF6                                                                                                         | E3 ubiquitin-protein ligase mediating 'Lys-48'-linked polyubiquitination of LIMK1 and its subsequent targeting to the proteasome for degradation. Negatively regulates axonal outgrowth through regulation of the LIMK1 turnover. Mediates 'Lys-6' and 'Lys-27'-linked polyubiquitination of AR/androgen receptor thereby modulating its transcriptional activity. May also bind DNA and function as a transcriptional regulator.                                                                                                                                                                                                                                                                                                                                                                                                                                                                                                                                                                                                       | Potentiate    | 39%                                       |  |
| STUB1                                                                                                        | E3 ubiquitin-protein ligase which targets misfolded chaperone substrates towards proteasomal degradation. Collaborates with ATXN3 in the degradation of misfolded chaperone substrates: ATXN3 restricting the length of ubiquitin chain attached to STUB1/CHIP substrates and preventing further chain extension. Ubiquitinates NOS1 in concert with Hsp70 and Hsp40. Modulates the activity of several chaperone complexes, including Hsp70, Hsc70 and Hsp90. Mediates transfer of non-canonical short ubiquitin chains to HSPA8 that have no effect on HSPA8 degradation. Mediates polyubiquitination of DNA polymerase beta (POLB) at 'Lys-41', 'Lys-61' and 'Lys-81', thereby playing a role in base-excision repair: catalyzes polyubiquitination by amplifying the HUWE1/ARF-BP1-dependent monoubiquitination and leading to POLB-degradation by the proteasome. Mediates polyubiquitination of CYP3A4. Ubiquitinates EPHA2 and may regulate the receptor stability and activity through proteasomal degradation.                 | Potentiate    | 34%                                       |  |
| MDM2                                                                                                         | E3 ubiquitin-protein ligase that mediates ubiquitination of p53/TP53, leading to its degradation by the proteasome. Inhibits p53/TP53- and p73/TP73-mediated cell cycle arrest and apoptosis by binding its transcriptional activation domain. Also acts as a ubiquitin ligase E3 toward itself and ARRB1. Permits the nuclear export of p53/TP53. Promotes proteasome-dependent ubiquitin-independent degradation of retinoblastoma RB1 protein. Inhibits DAXX-mediated apoptosis by inducing its ubiquitination and degradation. Component of the TRIM28/KAP1-MDM2-p53/TP53 complex involved in stabilizing p53/TP53. Also component of the TRIM28/KAP1-ERBB4-MDM2 complex which links growth factor and DNA damage response pathways. Mediates ubiquitination and subsequent proteasome degradation of DYRK2 in nucleus. Ubiquitinates IGF1R and SNAI1 and promotes them to proteasomal degradation.                                                                                                                                 | attenuate     | -64%                                      |  |
| TRIM68                                                                                                       | Functions as a ubiquitin E3 ligase. Acts as a coactivator of androgen receptor (AR) depending on its ubiquitin ligase activity.                                                                                                                                                                                                                                                                                                                                                                                                                                                                                                                                                                                                                                                                                                                                                                                                                                                                                                         | attenuate     | -74%                                      |  |
| HACE1                                                                                                        | E3 ubiquitin-protein ligase involved in Golgi membrane fusion and regulation of small GTPases. Acts as a regulator of Golgi membrane dynamics during the cell cycle: recruited to Golgi membrane by Rab proteins and regulates postmitotic Golgi membrane fusion. Acts by mediating ubiquitination during mitotic Golgi disassembly, ubiquitination serving as a signal for Golgi reassembly later, after cell division. Specifically interacts with GTP-bound RAC1, mediating ubiquitination and subsequent degradation of active RAC1, thereby playing a role in host defense against pathogens. May also act as a transcription regulator via its interaction with RARB.                                                                                                                                                                                                                                                                                                                                                             | attenuate     | -22%                                      |  |
| LRSAM1                                                                                                       | E3 ubiquitin-protein ligase that mediates monoubiquitination of TSG101 at multiple sites, leading to inactivate the ability of TSG101 to sort endocytic (EGF receptors) and exocytic (HIV-1 viral proteins) cargos.                                                                                                                                                                                                                                                                                                                                                                                                                                                                                                                                                                                                                                                                                                                                                                                                                     | attenuate     | -34%                                      |  |
| TRIM41                                                                                                       | Functions as an E3 ligase that catalyzes the ubiquitin-mediated degradation of protein kinase C.                                                                                                                                                                                                                                                                                                                                                                                                                                                                                                                                                                                                                                                                                                                                                                                                                                                                                                                                        | attenuate     | -52%                                      |  |

|        |                                                                                                                                                                                                                                                                                                                                                                                                                                                                                                                                                                                                                                                                                                                                                                                                                                                                                                                                                                                                                                                                                                                                                                                                                                                                                                                                         |           |      |  |  |
|--------|-----------------------------------------------------------------------------------------------------------------------------------------------------------------------------------------------------------------------------------------------------------------------------------------------------------------------------------------------------------------------------------------------------------------------------------------------------------------------------------------------------------------------------------------------------------------------------------------------------------------------------------------------------------------------------------------------------------------------------------------------------------------------------------------------------------------------------------------------------------------------------------------------------------------------------------------------------------------------------------------------------------------------------------------------------------------------------------------------------------------------------------------------------------------------------------------------------------------------------------------------------------------------------------------------------------------------------------------|-----------|------|--|--|
| TOPORS | Functions as an E3 ubiquitin-protein ligase and as an E3 SUMO1-protein ligase. Probable tumor suppressor involved in cell growth, cell proliferation and apoptosis that regulates p53/TP53 stability through ubiquitin-dependent degradation. May regulate chromatin modification through sumoylation of several chromatin modification-associated proteins. May be involved in DNA damage-induced cell death through IKBKE sumoylation.                                                                                                                                                                                                                                                                                                                                                                                                                                                                                                                                                                                                                                                                                                                                                                                                                                                                                                | attenuate | -62% |  |  |
| RNF123 | Catalytic subunit of the KPC complex that acts as E3 ubiquitin-protein ligase. Required for poly-ubiquitination and proteasome-mediated degradation of CDKN1B during G1 phase of the cell cycle.                                                                                                                                                                                                                                                                                                                                                                                                                                                                                                                                                                                                                                                                                                                                                                                                                                                                                                                                                                                                                                                                                                                                        | attenuate | -62% |  |  |
| UBR4   | E3 ubiquitin-protein ligase which is a component of the N-end rule pathway. Recognizes and binds to proteins bearing specific N-terminal residues that are destabilizing according to the N-end rule, leading to their ubiquitination and subsequent degradation. Together with clathrin, forms meshwork structures involved in membrane morphogenesis and cytoskeletal organization. Regulates integrin-mediated signaling. May play a role in activation of FAK in response to cell-matrix interactions. Mediates ubiquitination of ACLY, leading to its subsequent degradation.                                                                                                                                                                                                                                                                                                                                                                                                                                                                                                                                                                                                                                                                                                                                                      | attenuate | -16% |  |  |
| HECTD3 | E3 ubiquitin ligases accepts ubiquitin from an E2 ubiquitin-conjugating enzyme in the form of a thioester and then directly transfers the ubiquitin to targeted substrates. Mediates ubiquitination of TRIOBP and its subsequent proteasomal degradation, thus facilitating cell cycle progression by regulating the turn-over of TRIOBP. Mediates also ubiquitination of STX8                                                                                                                                                                                                                                                                                                                                                                                                                                                                                                                                                                                                                                                                                                                                                                                                                                                                                                                                                          | No effect | 14%  |  |  |
| MARCH7 | E3 ubiquitin-protein ligase which may specifically enhance the E2 activity of HIP2. E3 ubiquitin ligases accept ubiquitin from an E2 ubiquitin-conjugating enzyme in the form of a thioester and then directly transfer the ubiquitin to targeted substrates.                                                                                                                                                                                                                                                                                                                                                                                                                                                                                                                                                                                                                                                                                                                                                                                                                                                                                                                                                                                                                                                                           | attenuate | -21% |  |  |
| SMURF1 | E3 ubiquitin-protein ligase that acts as a negative regulator of BMP signaling pathway. Mediates ubiquitination and degradation of SMAD1 and SMAD5, 2 receptor-regulated SMADs specific for the BMP pathway. Promotes ubiquitination and subsequent proteasomal degradation of TRAF family members and RHOA.                                                                                                                                                                                                                                                                                                                                                                                                                                                                                                                                                                                                                                                                                                                                                                                                                                                                                                                                                                                                                            | attenuate | -14% |  |  |
| CBL    | Adapter protein that functions as a negative regulator of many signaling pathways that are triggered by activation of cell surface receptors. Acts as an E3 ubiquitin-protein ligase, which accepts ubiquitin from specific E2 ubiquitin-conjugating enzymes, and then transfers it to substrates promoting their degradation by the proteasome. Recognizes activated receptor tyrosine kinases, including KIT, FLT1, FGFR1, FGFR2, PDGFRA, PDGFRB, EGFR, CSF1R, EPHA8 and KDR and terminates signaling. Recognizes membrane-bound HCK, SRC and other kinases of the SRC family and mediates their ubiquitination and degradation. Participates in signal transduction in hematopoietic cells. Plays an important role in the regulation of osteoblast differentiation and apoptosis. Essential for osteoclastic bone resorption. The 'Tyr-731' phosphorylated form induces the activation and recruitment of phosphatidylinositol 3-kinase to the cell membrane in a signaling pathway that is critical for osteoclast function. May be functionally coupled with the E2 ubiquitin-protein ligase UB2D3.                                                                                                                                                                                                                               | attenuate | -44% |  |  |
| TRIP12 | E3 ubiquitin-protein ligase involved in ubiquitin fusion degradation (UFD) pathway and regulation of DNA repair. Part of the ubiquitin fusion degradation (UFD) pathway, a process that mediates ubiquitination of protein at their N-terminus, regardless of the presence of lysine residues in target proteins. In normal cells, mediates ubiquitination and degradation of isoform p19ARF/ARF of CDKN2A, a lysine-less tumor suppressor required for p53/TP53 activation under oncogenic stress. In cancer cells, however, isoform p19ARF/ARF and TRIP12 are located in different cell compartments, preventing isoform p19ARF/ARF ubiquitination and degradation. Does not mediate ubiquitination of isoform p16-INK4a of CDKN2A. Also catalyzes ubiquitination of NAE1 and SMARCE1, leading to their degradation. Ubiquitination and degradation of target proteins is regulated by interaction with proteins such as MYC, TRADD or SMARCC1, which disrupt the interaction between TRIP12 and target proteins. Acts as a key regulator of DNA damage response by acting as a suppressor of RNF168, an E3 ubiquitin-protein ligase that promotes accumulation of 'Lys-63'-linked histone H2A and H2AX at DNA damage sites, thereby acting as a guard against excessive spreading of ubiquitinated chromatin at damaged chromosomes. | attenuate | -74% |  |  |
| TRIM25 | Functions as a ubiquitin E3 ligase and as an ISG15 E3 ligase. Involved in innate immune defense against viruses by mediating ubiquitination of DDX58. Mediates 'Lys-63'-linked polyubiquitination of the DDX58 N-terminal CARD-like region which is crucial for triggering the cytosolic signal transduction that leads to the production of interferons in response to viral infection. Promotes ISGylation of 14-3-3 sigma (SFN), an adapter protein implicated in the regulation of a large spectrum signaling pathway. Mediates estrogen action in various target organs.                                                                                                                                                                                                                                                                                                                                                                                                                                                                                                                                                                                                                                                                                                                                                           | attenuate | -80% |  |  |
| HUWE1  | E3 ubiquitin-protein ligase which mediates ubiquitination and subsequent proteasomal degradation of target proteins. Regulates apoptosis by catalyzing the polyubiquitination and degradation of MCL1. Mediates monoubiquitination of DNA polymerase beta (POLB) at 'Lys-41', 'Lys-61' and 'Lys-81', thereby playing a role in base-excision repair. Also ubiquitinates the p53/TP53 tumor suppressor and core histones including H1, H2A, H2B, H3 and H4. Binds to an upstream initiator-like sequence in the preprodynorphin gene. Regulates neural differentiation and proliferation by catalyzing the polyubiquitination and degradation of MYCN. May regulate abundance of CDC6 after DNA damage by polyubiquitinating and targeting CDC6 to degradation.                                                                                                                                                                                                                                                                                                                                                                                                                                                                                                                                                                          | attenuate | -25% |  |  |



| <b>Sumoylation</b>      | <b>Description</b>                                                                                                                                                                                                                                                                                                                                                                                                                                                                                                                                                                                                                                                                                                                                                                                                                                                                                                                                                                                                                                                                                                                                                                                                                                                                                                             | <b>Effect</b> | <b>% increase (+)<br/>or decrease (-)</b> |  |  |
|-------------------------|--------------------------------------------------------------------------------------------------------------------------------------------------------------------------------------------------------------------------------------------------------------------------------------------------------------------------------------------------------------------------------------------------------------------------------------------------------------------------------------------------------------------------------------------------------------------------------------------------------------------------------------------------------------------------------------------------------------------------------------------------------------------------------------------------------------------------------------------------------------------------------------------------------------------------------------------------------------------------------------------------------------------------------------------------------------------------------------------------------------------------------------------------------------------------------------------------------------------------------------------------------------------------------------------------------------------------------|---------------|-------------------------------------------|--|--|
| CBX4                    | E3 SUMO-protein ligase CBX4                                                                                                                                                                                                                                                                                                                                                                                                                                                                                                                                                                                                                                                                                                                                                                                                                                                                                                                                                                                                                                                                                                                                                                                                                                                                                                    | attenuate     | -61%                                      |  |  |
| SUMO3                   | Small ubiquitin-related modifier 3                                                                                                                                                                                                                                                                                                                                                                                                                                                                                                                                                                                                                                                                                                                                                                                                                                                                                                                                                                                                                                                                                                                                                                                                                                                                                             | attenuate     | -73%                                      |  |  |
| UBE2I                   | SUMO-conjugating enzyme UBC9                                                                                                                                                                                                                                                                                                                                                                                                                                                                                                                                                                                                                                                                                                                                                                                                                                                                                                                                                                                                                                                                                                                                                                                                                                                                                                   | No effect     | -14%                                      |  |  |
| RANBP2                  | E3 SUMO-protein ligase RanBP2                                                                                                                                                                                                                                                                                                                                                                                                                                                                                                                                                                                                                                                                                                                                                                                                                                                                                                                                                                                                                                                                                                                                                                                                                                                                                                  | No effect     | -9%                                       |  |  |
|                         |                                                                                                                                                                                                                                                                                                                                                                                                                                                                                                                                                                                                                                                                                                                                                                                                                                                                                                                                                                                                                                                                                                                                                                                                                                                                                                                                |               |                                           |  |  |
| <b>De-ubiquitinases</b> | <b>Description</b>                                                                                                                                                                                                                                                                                                                                                                                                                                                                                                                                                                                                                                                                                                                                                                                                                                                                                                                                                                                                                                                                                                                                                                                                                                                                                                             | <b>Effect</b> | <b>% increase (+)<br/>or decrease (-)</b> |  |  |
| USP10                   | Hydrolase that can remove conjugated ubiquitin from target proteins such as p53/TP53, BECN1, SNX3 and CFTR. Acts as an essential regulator of p53/TP53 stability: in unstressed cells, specifically deubiquitinates p53/TP53 in the cytoplasm, leading to counteract MDM2 action and stabilize p53/TP53. Following DNA damage, translocates to the nucleus and deubiquitinates p53/TP53, leading to regulate the p53/TP53-dependent DNA damage response. Component of a regulatory loop that controls autophagy and p53/TP53 levels: mediates deubiquitination of BECN1, a key regulator of autophagy, leading to stabilize the PIK3C3/VPS34-containing complexes. In turn, PIK3C3/VPS34-containing complexes regulate USP10 stability, suggesting the existence of a regulatory system by which PIK3C3/VPS34-containing complexes regulate p53/TP53 protein levels via USP10 and USP13. Does not deubiquitinate MDM2. Deubiquitinates CFTR in early endosomes, enhancing its endocytic recycling.                                                                                                                                                                                                                                                                                                                             | Potentiate    | 186%                                      |  |  |
| USP20                   | Deubiquitinating enzyme involved in beta-2 adrenergic receptor (ADRB2) recycling. Acts as a regulator of G-protein coupled receptor (GPCR) signaling by mediating the deubiquitination beta-2 adrenergic receptor (ADRB2). Plays a central role in ADRB2 recycling and resensitization after prolonged agonist stimulation by constitutively binding ADRB2, mediating deubiquitination of ADRB2 and inhibiting lysosomal trafficking of ADRB2. Upon dissociation, it is probably transferred to the translocated beta-arrestins, possibly leading to beta-arrestins deubiquitination and disengagement from ADRB2. This suggests the existence of a dynamic exchange between the ADRB2 and beta-arrestins. Deubiquitinates DIO2, thereby regulating thyroid hormone regulation. Deubiquitinates HIF1A, leading to stabilize HIF1A and enhance HIF1A-mediated activity. Mediates deubiquitination of both 'Lys-48'- and 'Lys-63'-linked polyubiquitin chains.                                                                                                                                                                                                                                                                                                                                                                   | Potentiate    | 161%                                      |  |  |
| USP43                   | May recognize and hydrolyze the peptide bond at the C-terminal Gly of ubiquitin. Involved in the processing of poly-ubiquitin precursors as well as that of ubiquitinated proteins                                                                                                                                                                                                                                                                                                                                                                                                                                                                                                                                                                                                                                                                                                                                                                                                                                                                                                                                                                                                                                                                                                                                             | Potentiate    | 218%                                      |  |  |
| USP45                   | Thiol-dependent hydrolysis of ester, thioester, amide, peptide and isopeptide bonds formed by the C-terminal Gly of ubiquitin (a 76-residue protein attached to proteins as an intracellular targeting signal).                                                                                                                                                                                                                                                                                                                                                                                                                                                                                                                                                                                                                                                                                                                                                                                                                                                                                                                                                                                                                                                                                                                | Potentiate    | 80%                                       |  |  |
| USP38                   | Deubiquitinating enzyme exhibiting a preference towards 'Lys-63'-linked Ubiquitin chains.                                                                                                                                                                                                                                                                                                                                                                                                                                                                                                                                                                                                                                                                                                                                                                                                                                                                                                                                                                                                                                                                                                                                                                                                                                      | Potentiate    | 73%                                       |  |  |
| USP49                   | Specifically deubiquitinates histone H2B at 'Lys-120' (H2BK120Ub). H2BK120Ub is a specific tag for epigenetic transcriptional activation and acts as a regulator of mRNA splicing. Deubiquitination is required for efficient cotranscriptional splicing of a large set of exons.                                                                                                                                                                                                                                                                                                                                                                                                                                                                                                                                                                                                                                                                                                                                                                                                                                                                                                                                                                                                                                              | Potentiate    | 47%                                       |  |  |
| USP14                   | Proteasome-associated deubiquitinase which releases ubiquitin from the proteasome targeted ubiquitinated proteins. Ensures the regeneration of ubiquitin at the proteasome. Is a reversibly associated subunit of the proteasome and a large fraction of proteasome-free protein exists within the cell. Required for the degradation of the chemokine receptor CXCR4 which is critical for CXCL12-induced cell chemotaxis. Serves also as a physiological inhibitor of endoplasmic reticulum-associated degradation (ERAD) under the non-stressed condition by inhibiting the degradation of unfolded endoplasmic reticulum proteins via interaction with ERN1. Indispensable for synaptic development and function at neuromuscular junctions (NMJs).                                                                                                                                                                                                                                                                                                                                                                                                                                                                                                                                                                        | no effect     | 5%                                        |  |  |
| USP13                   | Deubiquitinase that mediates deubiquitination of target proteins such as BECN1, MITF, SKP2 and USP10 and is involved in various processes such as autophagy and endoplasmic reticulum-associated degradation (ERAD). Component of a regulatory loop that controls autophagy and p53/TP53 levels: mediates deubiquitination of BECN1, a key regulator of autophagy, leading to stabilize the PIK3C3/VPS34-containing complexes. Also deubiquitinates USP10, an essential regulator of p53/TP53 stability. In turn, PIK3C3/VPS34-containing complexes regulate USP13 stability, suggesting the existence of a regulatory system by which PIK3C3/VPS34-containing complexes regulate p53/TP53 protein levels via USP10 and USP13. Recruited by nuclear UFD1 and mediates deubiquitination of SKP2, thereby regulating endoplasmic reticulum-associated degradation (ERAD). Mediates stabilization of SIAH2 independently of deubiquitinase activity: binds ubiquitinated SIAH2 and acts by impairing SIAH2 autoubiquitination. Has a weak deubiquitinase activity in vitro and preferentially cleaves 'Lys-63'-linked polyubiquitin chains. In contrast to USP5, it is not able to mediate unanchored polyubiquitin disassembly. Able to cleave ISG15 in vitro; however, additional experiments are required to confirm such data | No effect     | -6%                                       |  |  |

|                                |                                                                                                                                                                                                                                                                                                                                                                                                                                                                                                                                                                                                                                                                                                                                                                                                                                                                                                                                                                                                                                                                                                                                                                                                                                                                                                                                                                                                                                                                                                                                                                                                            |               |                                       |  |  |
|--------------------------------|------------------------------------------------------------------------------------------------------------------------------------------------------------------------------------------------------------------------------------------------------------------------------------------------------------------------------------------------------------------------------------------------------------------------------------------------------------------------------------------------------------------------------------------------------------------------------------------------------------------------------------------------------------------------------------------------------------------------------------------------------------------------------------------------------------------------------------------------------------------------------------------------------------------------------------------------------------------------------------------------------------------------------------------------------------------------------------------------------------------------------------------------------------------------------------------------------------------------------------------------------------------------------------------------------------------------------------------------------------------------------------------------------------------------------------------------------------------------------------------------------------------------------------------------------------------------------------------------------------|---------------|---------------------------------------|--|--|
| USP36                          | May be required for maintaining multiple types of adult stem cells. May function as a transcriptional repressor by continually deubiquitinating histone H2B at the promoters of genes critical for cellular differentiation, thereby preventing histone H3 'Lys-4' trimethylation (H3K4)                                                                                                                                                                                                                                                                                                                                                                                                                                                                                                                                                                                                                                                                                                                                                                                                                                                                                                                                                                                                                                                                                                                                                                                                                                                                                                                   | potentiate    | 41%                                   |  |  |
| USP7                           | Hydrolase that deubiquitinates target proteins such as FOXO4, p53/TP53, MDM2, ERCC6, DNMT1, UHRF1, PTEN and DAXX. Together with DAXX, prevents MDM2 self-ubiquitination and enhances the E3 ligase activity of MDM2 towards p53/TP53, thereby promoting p53/TP53 ubiquitination and proteasomal degradation. Deubiquitinates p53/TP53 and MDM2 and strongly stabilizes p53/TP53 even in the presence of excess MDM2, and also induces p53/TP53-dependent cell growth repression and apoptosis. Deubiquitination of FOXO4 in presence of hydrogen peroxide is not dependent on p53/TP53 and inhibits FOXO4-induced transcriptional activity. In association with DAXX, is involved in the deubiquitination and translocation of PTEN from the nucleus to the cytoplasm, both processes that are counteracted by PML. Involved in cell proliferation during early embryonic development. Involved in transcription-coupled nucleotide excision repair (TC-NER) in response to UV damage: recruited to DNA damage sites following interaction with KIAA1530/UVSSA and promotes deubiquitination of ERCC6, preventing UV-induced degradation of ERCC6. Contributes to the overall stabilization and trans-activation capability of the herpesvirus 1 trans-acting transcriptional protein ICP0/VMW110 during HSV-1 infection. Involved in maintenance of DNA methylation via its interaction with UHRF1 and DNMT1: acts by mediating deubiquitination of UHRF1 and DNMT1, preventing their degradation and promoting DNA methylation by DNMT1. Exhibits a preference towards 'Lys-48'-linked Ubiquitin chains. | attenuate     | -56%                                  |  |  |
| USP5                           | Cleaves linear and branched multiubiquitin polymers with a marked preference for branched polymers. Involved in unanchored 'Lys-48'-linked polyubiquitin disassembly. Binds linear and 'Lys-63'-linked polyubiquitin with a lower affinity. Knock-down of USP5 causes the accumulation of p53/TP53 and an increase in p53/TP53 transcriptional activity because the unanchored polyubiquitin that accumulates is able to compete with ubiquitinated p53/TP53 but not with MDM2 for proteasomal recognition.                                                                                                                                                                                                                                                                                                                                                                                                                                                                                                                                                                                                                                                                                                                                                                                                                                                                                                                                                                                                                                                                                                | attenuate     | -41%                                  |  |  |
| USP35                          | Thiol-dependent hydrolysis of ester, thioester, amide, peptide and isopeptide bonds formed by the C-terminal Gly of ubiquitin (a 76-residue protein attached to proteins as an intracellular targeting signal).                                                                                                                                                                                                                                                                                                                                                                                                                                                                                                                                                                                                                                                                                                                                                                                                                                                                                                                                                                                                                                                                                                                                                                                                                                                                                                                                                                                            | attenuate     | -51%                                  |  |  |
| <b>COPI retrograde complex</b> | <b>Description</b>                                                                                                                                                                                                                                                                                                                                                                                                                                                                                                                                                                                                                                                                                                                                                                                                                                                                                                                                                                                                                                                                                                                                                                                                                                                                                                                                                                                                                                                                                                                                                                                         | <b>Effect</b> | <b>% increase (+) or decrease (-)</b> |  |  |
| ARF1                           | GTP-binding protein that functions as an allosteric activator of the cholera toxin catalytic subunit, an ADP-ribosyltransferase. Involved in protein trafficking among different compartments. Modulates vesicle budding and uncoating within the Golgi complex. Deactivation induces the redistribution of the entire Golgi complex to the endoplasmic reticulum, suggesting a crucial role in protein trafficking. In its GTP-bound form, it triggers the association with coat proteins with the Golgi membrane. The hydrolysis of ARF1-bound GTP, which is mediated by ARFGAPs proteins, is required for dissociation of coat proteins from Golgi membranes and vesicles. The GTP-bound form interacts with PICK1 to limit PICK1-mediated inhibition of Arp2/3 complex activity; the function is linked to AMPA receptor (AMPA) trafficking, regulation of synaptic plasticity of excitatory synapses and spine shrinkage during long-term depression (LTD).                                                                                                                                                                                                                                                                                                                                                                                                                                                                                                                                                                                                                                           | attenuate     | -62%                                  |  |  |
| COPA                           | The coatomer is a cytosolic protein complex that binds to dilysine motifs and reversibly associates with Golgi non-clathrin-coated vesicles, which further mediate biosynthetic protein transport from the ER, via the Golgi up to the trans Golgi network. Coatomer complex is required for budding from Golgi membranes, and is essential for the retrograde Golgi-to-ER transport of dilysine-tagged proteins. In mammals, the coatomer can only be recruited by membranes associated to ADP-ribosylation factors (ARFs), which are small GTP-binding proteins; the complex also influences the Golgi structural integrity, as well as the processing, activity, and endocytic recycling of LDL receptors                                                                                                                                                                                                                                                                                                                                                                                                                                                                                                                                                                                                                                                                                                                                                                                                                                                                                               | attenuate     | -61%                                  |  |  |
| COPD                           | The coatomer is a cytosolic protein complex that binds to dilysine motifs and reversibly associates with Golgi non-clathrin-coated vesicles, which further mediate biosynthetic protein transport from the ER, via the Golgi up to the trans Golgi network. Coatomer complex is required for budding from Golgi membranes, and is essential for the retrograde Golgi-to-ER transport of dilysine-tagged proteins. In mammals, the coatomer can only be recruited by membranes associated to ADP-ribosylation factors (ARFs), which are small GTP-binding proteins; the complex also influences the Golgi structural integrity, as well as the processing, activity, and endocytic recycling of LDL receptors                                                                                                                                                                                                                                                                                                                                                                                                                                                                                                                                                                                                                                                                                                                                                                                                                                                                                               | attenuate     | -76%                                  |  |  |
| COPE                           | The coatomer is a cytosolic protein complex that binds to dilysine motifs and reversibly associates with Golgi non-clathrin-coated vesicles, which further mediate biosynthetic protein transport from the ER, via the Golgi up to the trans Golgi network. Coatomer complex is required for budding from Golgi membranes, and is essential for the retrograde Golgi-to-ER transport of dilysine-tagged proteins. In mammals, the coatomer can only be recruited by membranes associated to ADP-ribosylation factors (ARFs), which are small GTP-binding proteins; the complex also influences the Golgi structural integrity, as well as the processing, activity, and endocytic recycling of LDL receptors                                                                                                                                                                                                                                                                                                                                                                                                                                                                                                                                                                                                                                                                                                                                                                                                                                                                                               | attenuate     | -43%                                  |  |  |

|                                    |                                                                                                                                                                                                                                                                                                                                                                                                                                                                                                                                                                                                                                                                                                              |               |                                           |  |  |
|------------------------------------|--------------------------------------------------------------------------------------------------------------------------------------------------------------------------------------------------------------------------------------------------------------------------------------------------------------------------------------------------------------------------------------------------------------------------------------------------------------------------------------------------------------------------------------------------------------------------------------------------------------------------------------------------------------------------------------------------------------|---------------|-------------------------------------------|--|--|
| COPG                               | The coatomer is a cytosolic protein complex that binds to dilysine motifs and reversibly associates with Golgi non-clathrin-coated vesicles, which further mediate biosynthetic protein transport from the ER, via the Golgi up to the trans Golgi network. Coatomer complex is required for budding from Golgi membranes, and is essential for the retrograde Golgi-to-ER transport of dilysine-tagged proteins. In mammals, the coatomer can only be recruited by membranes associated to ADP-ribosylation factors (ARFs), which are small GTP-binding proteins; the complex also influences the Golgi structural integrity, as well as the processing, activity, and endocytic recycling of LDL receptors | attenuate     | -20%                                      |  |  |
| <b>ER to Golgi</b>                 |                                                                                                                                                                                                                                                                                                                                                                                                                                                                                                                                                                                                                                                                                                              |               |                                           |  |  |
| <b>Retromers and COPII complex</b> | <b>Description</b>                                                                                                                                                                                                                                                                                                                                                                                                                                                                                                                                                                                                                                                                                           | <b>Effect</b> | <b>% increase (+)<br/>or decrease (-)</b> |  |  |
| VPS26A                             | Essential component of the retromer complex, a complex required to retrieve lysosomal enzyme receptors (IGF2R and M6PR) from endosomes to the trans-Golgi network. Also required to regulate transcytosis of the polymeric immunoglobulin receptor (pIgR-pIgA). Component of the retromer complex composed of VPS26 (VPS26A or VPS26B), VPS29, VPS35, SNX1 and SNX2. Interacts directly with VPS35. Found in a complex with XPO7, EIF4A1, ARHGAP1, VPS26A, VPS29, VPS35 and SFN. Interacts with ECM29.                                                                                                                                                                                                       | Attenuate     | -36%                                      |  |  |
| VPS35                              | Essential component of the retromer complex, a complex required to retrieve lysosomal enzyme receptors (IGF2R and M6PR) from endosomes to the trans-Golgi network. Also required to regulate transcytosis of the polymeric immunoglobulin receptor (pIgR-pIgA).                                                                                                                                                                                                                                                                                                                                                                                                                                              | Attenuate     | -43%                                      |  |  |
| SEC24B                             | Component of the COPII coat, that covers ER-derived vesicles involved in transport from the endoplasmic reticulum to the Golgi apparatus. COPII acts in the cytoplasm to promote the transport of secretory, plasma membrane, and vacuolar proteins from the endoplasmic reticulum to the Golgi complex. COPII is composed of at least five proteins: the Sec23/24 complex, the Sec13/31 complex and SAR1. SEC24B is capable of forming heterodimers with SEC24A. Interacts with RNF139. Interacts with TMED2 and TMED10.                                                                                                                                                                                    | No effect     | -45%                                      |  |  |
| SEC16A                             | Defines endoplasmic reticulum exit sites (ERES) and is required for secretory cargo traffic from the endoplasmic reticulum to the Golgi apparatus. SAR1A-GTP-dependent assembly of SEC16A on the ER membrane forms an organized scaffold defining an ERES. Required for normal transitional endoplasmic reticulum (tER) organization.                                                                                                                                                                                                                                                                                                                                                                        | attenuate     | -16%                                      |  |  |
| SEC24C                             | Component of the COPII coat, that covers ER-derived vesicles involved in transport from the endoplasmic reticulum to the Golgi apparatus. COPII acts in the cytoplasm to promote the transport of secretory, plasma membrane, and vacuolar proteins from the endoplasmic reticulum to the Golgi complex.                                                                                                                                                                                                                                                                                                                                                                                                     | Attenuate     | -65%                                      |  |  |
| <b>Golgi and ER proteins</b>       |                                                                                                                                                                                                                                                                                                                                                                                                                                                                                                                                                                                                                                                                                                              |               |                                           |  |  |
| POMT1                              | Transfers mannosyl residues to the hydroxyl group of serine or threonine residues. Coexpression of both POMT1 and POMT2 is necessary for enzyme activity, expression of either POMT1 or POMT2 alone is insufficient.                                                                                                                                                                                                                                                                                                                                                                                                                                                                                         | attenuate     | -87%                                      |  |  |
| ZDHHC17                            | Palmitoyltransferase specific for a subset of neuronal proteins, including SNAP25, DLG4/PSD95, GAD2, SYT1 and HD. Palmitoylates MPP1 in erythrocytes. May be involved in the sorting or targeting of critical proteins involved in the initiating events of endocytosis at the plasma membrane. Has transforming activity. Mediates Mg <sup>2+</sup> transport.                                                                                                                                                                                                                                                                                                                                              | attenuate     | -57%                                      |  |  |
| UGT1A6                             | UDPGT is of major importance in the conjugation and subsequent elimination of potentially toxic xenobiotics and endogenous compounds. This isoform has specificity for phenols. Isoform 3 lacks transferase activity but acts as a negative regulator of isoform 1                                                                                                                                                                                                                                                                                                                                                                                                                                           | potentiate    | 61%                                       |  |  |
| <b>Others</b>                      |                                                                                                                                                                                                                                                                                                                                                                                                                                                                                                                                                                                                                                                                                                              |               |                                           |  |  |
| UBA1                               | Activates ubiquitin by first adenylating its C-terminal glycine residue with ATP, and thereafter linking this residue to the side chain of a cysteine residue in E1, yielding a ubiquitin-E1 thioester and free AMP.                                                                                                                                                                                                                                                                                                                                                                                                                                                                                         | attenuate     | -78%                                      |  |  |
| UBQLN2                             | Increases the half-life of proteins destined to be degraded by the proteasome; may modulate proteasome-mediated protein degradation.                                                                                                                                                                                                                                                                                                                                                                                                                                                                                                                                                                         | attenuate     | -84%                                      |  |  |
| NEDD8                              | Ubiquitin-like protein which plays an important role in cell cycle control and embryogenesis. Covalent attachment to its substrates requires prior activation by the E1 complex UBE1C-APPBP1 and linkage to the E2 enzyme UBE2M. Attachment of NEDD8 to cullins activates their associated E3 ubiquitin ligase activity, and thus promotes polyubiquitination and proteasomal degradation of cyclins and other regulatory proteins.                                                                                                                                                                                                                                                                          | attenuate     | -77%                                      |  |  |
| CAND1                              | Key assembly factor of SCF (SKP1-CUL1-F-box protein) E3 ubiquitin ligase complexes that promotes the exchange of the substrate-recognition F-box subunit in SCF complexes, thereby playing a key role in the cellular repertoire of SCF complexes.                                                                                                                                                                                                                                                                                                                                                                                                                                                           | attenuate     | -78%                                      |  |  |

|        |                                                                                                                                                                                                                                                                                                                                                                                                                                                                                                                                                                                                                                                                                                                                                                                                                                                                                                                                                                                                                                                                                                                                                                         |            |      |  |  |
|--------|-------------------------------------------------------------------------------------------------------------------------------------------------------------------------------------------------------------------------------------------------------------------------------------------------------------------------------------------------------------------------------------------------------------------------------------------------------------------------------------------------------------------------------------------------------------------------------------------------------------------------------------------------------------------------------------------------------------------------------------------------------------------------------------------------------------------------------------------------------------------------------------------------------------------------------------------------------------------------------------------------------------------------------------------------------------------------------------------------------------------------------------------------------------------------|------------|------|--|--|
| SHBG   | Functions as an androgen transport protein, but may also be involved in receptor mediated processes. Each dimer binds one molecule of steroid. Specific for 5-alpha-dihydrotestosterone, testosterone, and 17-beta-estradiol. Regulates the plasma metabolic clearance rate of steroid hormones by controlling their plasma concentration.                                                                                                                                                                                                                                                                                                                                                                                                                                                                                                                                                                                                                                                                                                                                                                                                                              | attenuate  | -81% |  |  |
| N4BP2  | Has 5'-polynucleotide kinase and nicking endonuclease activity. May play a role in DNA repair or recombination.                                                                                                                                                                                                                                                                                                                                                                                                                                                                                                                                                                                                                                                                                                                                                                                                                                                                                                                                                                                                                                                         | attenuate  | -77% |  |  |
| SQSTM1 | Required both for the formation and autophagic degradation of polyubiquitin-containing bodies, called ALIS (aggresome-like induced structures). Links ALIS to the autophagic machinery via direct interaction with MAP1 LC3 family members. May regulate the activation of NFKB1 by TNF-alpha, nerve growth factor (NGF) and interleukin-1. May play a role in titin/TTN downstream signaling in muscle cells. May regulate signaling cascades through ubiquitination. Adapter that mediates the interaction between TRAF6 and CYLD By similarity. May be involved in cell differentiation, apoptosis, immune response and regulation of K+ channels                                                                                                                                                                                                                                                                                                                                                                                                                                                                                                                    | attenuate  | -74% |  |  |
| CDKAL1 | Catalyzes the methylthiolation of N6-threonylcarbamoyladenine (t6A), leading to the formation of 2-methylthio-N6-threonylcarbamoyladenine (ms2t6A) at position 37 in tRNAs that read codons beginning with adenine                                                                                                                                                                                                                                                                                                                                                                                                                                                                                                                                                                                                                                                                                                                                                                                                                                                                                                                                                      | attenuate  | -84% |  |  |
| GANAB  | Cleaves sequentially the 2 innermost alpha-1,3-linked glucose residues from the Glc2Man9GlcNAc2 oligosaccharide precursor of immature glycoproteins.                                                                                                                                                                                                                                                                                                                                                                                                                                                                                                                                                                                                                                                                                                                                                                                                                                                                                                                                                                                                                    | attenuate  | -75% |  |  |
| GBE1   | Required for sufficient glycogen accumulation. The alpha 1-6 branches of glycogen play an important role in increasing the solubility of the molecule and, consequently, in reducing the osmotic pressure within cells.                                                                                                                                                                                                                                                                                                                                                                                                                                                                                                                                                                                                                                                                                                                                                                                                                                                                                                                                                 | attenuate  | -60% |  |  |
| TLR4   | Cooperates with LY96 and CD14 to mediate the innate immune response to bacterial lipopolysaccharide (LPS). Acts via MYD88, TIRAP and TRAF6, leading to NF-kappa-B activation, cytokine secretion and the inflammatory response. Also involved in LPS-independent inflammatory responses triggered by Ni2+. These responses require non-conserved histidines and are, therefore, species-specific.                                                                                                                                                                                                                                                                                                                                                                                                                                                                                                                                                                                                                                                                                                                                                                       | attenuate  | -53% |  |  |
| GGCT   | Catalyzes the formation of 5-oxoproline from gamma-glutamyl dipeptides and may play a significant role in glutathione homeostasis. Induces release of cytochrome c from mitochondria with resultant induction of apoptosis                                                                                                                                                                                                                                                                                                                                                                                                                                                                                                                                                                                                                                                                                                                                                                                                                                                                                                                                              | potentiate | 800% |  |  |
| TSG101 | Component of the ESCRT-I complex, a regulator of vesicular trafficking process. Binds to ubiquitinated cargo proteins and is required for the sorting of endocytic ubiquitinated cargos into multivesicular bodies (MVBs). Mediates the association between the ESCRT-0 and ESCRT-I complex. Required for completion of cytokinesis; the function requires CEP55. May be involved in cell growth and differentiation. Acts as a negative growth regulator. Involved in the budding of many viruses through an interaction with viral proteins that contain a late-budding motif P[ST]-A-P. This interaction is essential for viral particle budding of numerous retroviruses.                                                                                                                                                                                                                                                                                                                                                                                                                                                                                           | no effect  | 7%   |  |  |
| UBE2N  | The UBE2V1-UBE2N and UBE2V2-UBE2N heterodimers catalyze the synthesis of non-canonical 'Lys-63'-linked polyubiquitin chains. This type of polyubiquitination does not lead to protein degradation by the proteasome. Mediates transcriptional activation of target genes. Plays a role in the control of progress through the cell cycle and differentiation. Plays a role in the error-free DNA repair pathway and contributes to the survival of cells after DNA damage. Acts together with the E3 ligases, HLTF and SHPRH, in the 'Lys-63'-linked poly-ubiquitination of PCNA upon genotoxic stress, which is required for DNA repair. Appears to act together with E3 ligase RNF5 in the 'Lys-63'-linked polyubiquitination of JKAMP thereby regulating JKAMP function by decreasing its association with components of the proteasome and ERAD. Promotes TRIM5 capsid-specific restriction activity and the UBE2V1-UBE2N heterodimer acts in concert with TRIM5 to generate 'Lys-63'-linked polyubiquitin chains which activate the MAP3K7/TAK1 complex which in turn results in the induction and expression of NF-kappa-B and MAPK-responsive inflammatory genes | no effect  | 12%  |  |  |
| NAGA   | Removes terminal alpha-N-acetylgalactosamine residues from glycolipids and glycopeptides. Required for the breakdown of glycolipids.                                                                                                                                                                                                                                                                                                                                                                                                                                                                                                                                                                                                                                                                                                                                                                                                                                                                                                                                                                                                                                    | attenuate  | -47% |  |  |
| USO1   | Required for protein transport from the ER to the Golgi complex. Homodimer. Dimerizes by parallel association of the tails, resulting in an elongated structure with two globular head domains side by side, and a long rod-like tail structure.                                                                                                                                                                                                                                                                                                                                                                                                                                                                                                                                                                                                                                                                                                                                                                                                                                                                                                                        | attenuate  | -46% |  |  |
| SEC13  | Functions as a component of the nuclear pore complex (NPC) and the COPII coat. At the endoplasmic reticulum, SEC13 is involved in the biogenesis of COPII-coated vesicles. As a component of the GATOR2 complex, inhibits GATOR1 complex, an inhibitor of the amino acid-sensing branch of the TORC1 pathway.                                                                                                                                                                                                                                                                                                                                                                                                                                                                                                                                                                                                                                                                                                                                                                                                                                                           | attenuate  | -62% |  |  |
| SEC22A | May be involved in vesicle transport between the ER and the Golgi complex                                                                                                                                                                                                                                                                                                                                                                                                                                                                                                                                                                                                                                                                                                                                                                                                                                                                                                                                                                                                                                                                                               | attenuate  | -62% |  |  |
|        |                                                                                                                                                                                                                                                                                                                                                                                                                                                                                                                                                                                                                                                                                                                                                                                                                                                                                                                                                                                                                                                                                                                                                                         |            |      |  |  |

Supplemental Table 4. Detailed description of the peptides identified in the proteomic screen

| Number | File Name                                  | Charge State (n) | Score | # of Miss Cleavages | Total Intensity | Variable Modifications | Sequence Map                                                        | Retention Time (min) | Delta Parent n/z | Delta Parent Mass | Delta Parent (ppm) | Protein Molecular Weight | Accession | Entry Name | Parent  |         |        |                                                               |
|--------|--------------------------------------------|------------------|-------|---------------------|-----------------|------------------------|---------------------------------------------------------------------|----------------------|------------------|-------------------|--------------------|--------------------------|-----------|------------|---------|---------|--------|---------------------------------------------------------------|
|        |                                            |                  |       |                     |                 |                        |                                                                     |                      |                  |                   |                    |                          |           |            | Protein | Species |        |                                                               |
| 1      | dirMS_041712_NAR_50mM_minus.11374.1874.3   | 0                | 27.22 | 1                   | 3.47E+06        |                        | (K)QVEDE(K)G V I D E I A / N M / N K / V I / L E / S R (L)          | 134.43               | 599.9481         | 1797.832          | -0.0026            | -1.5                     | 4.18      | 13588.1    | 4.66    | HUMAN   | FBV067 | Keratin, type II cytoskeletal 8 (Fragment)                    |
| 2      | dirMS_041712_NAR_20mM_minus.12370.1509.2   | 0                | 26.5  | 1                   | 1.97E+06        | M256m                  | (R)SLDMDR(R)S L I D I D I S I I I A / E / V N / R (A)               | 171.22               | 568.8364         | 1320.671          | 15.994             | -0.7                     | 4.03      | 37266.3    | 1.5     | HUMAN   | FBV068 | Keratin, type II cytoskeletal 8                               |
| 3      | dirMS_041712_NAR_30mM_plus.11767.11828.2   | 2                | 26.5  | 0                   | 5.40E+05        |                        | (K)YVSGGQ(K)K V I A S I C I D I L D I V N / V I G (K)               | 114.82               | 675.3393         | 1349.673          | -0.0016            | -1.2                     | 5.81      | 12.67      | 7.19    | HUMAN   | EF7E71 | Propionyl-CoA carboxylase beta chain, mitochondrial           |
| 4      | dirMS_041712_NAR_120mM_minus.9646.9913.3   | 3                | 26.42 | 0                   | 1.34E+07        |                        | (K)IQEYDE(K)K E Y D V E / S P / S N / V N / R (K)                   | 108.05               | 506.2424         | 1516.703          | 0.01               | 6.6                      | 4.65      | 120397.1   | 5.83    | HUMAN   | ASA3E0 | POTE ankyrin domain family member F                           |
| 5      | dirMS_041712_NAR_60mM_minus.9926.9945.3    | 3                | 26.39 | 1                   | 5.20E+05        |                        | (K)GLAAED(K)K I I L L A D E / S T / G S V I A K R (L)               | 115.15               | 496.9379         | 1488.802          | -0.0025            | -1.7                     | 6.07      | 30711.4    | 7.15    | HUMAN   | H3BP58 | Fructose-bisphosphate aldolase A (Fragment)                   |
| 6      | dirMS_041712_NAR_30mM_plus.12529.19494.3   | 3                | 26.13 | 1                   | 7.33E+05        |                        | (K)ADLTD(K)R I A I L A E / I T / T D A / K / N / P R (L)            | 170.02               | 529.6346         | 1586.89           | -0.0008            | -0.5                     | 6         | 18141.9    | 4.7     | HUMAN   | RV0077 | Hc70-interacting protein (Fragment)                           |
| 7      | dirMS_041712_NAR_50mM_minus.17263.75573.7  | 3                | 26.06 | 1                   | 9.35E+05        |                        | (K)DILDE(K)K V I D E I A / N M / N K / V I / L E / S R (L)          | 167.7                | 518.6447         | 1551.927          | -0.0075            | -0.8                     | 6.07      | 12120.7    | 4.66    | HUMAN   | FBV067 | Heterogeneous nuclear ribonucleoprotein K                     |
| 8      | dirMS_041712_NAR_50mM_plus.20242.20602.3   | 3                | 25.85 | 1                   | 1.67E+06        |                        | (R)TLTAAE(R)T L T A I E / H A / K A / L E / D / S T A / L K (S)     | 175.92               | 562.6601         | 1685.968          | -0.0026            | -1.6                     | 4.68      | 58856.7    | 6.26    | HUMAN   | QBWF13 | Paraspeckle component 1                                       |
| 9      | dirMS_041712_NAR_20mM_minus.12030.12362.2  | 2                | 25.51 | 0                   | 2.70E+06        | M256m                  | (R)SLDMDR(R)S L I D I D I S I I I A / E / V N / R (A)               | 171.22               | 568.8364         | 1320.671          | 15.994             | -0.7                     | 4.03      | 37266.3    | 5.3     | HUMAN   | FBV064 | Keratin, type II cytoskeletal 8                               |
| 10     | dirMS_041712_NAR_30mM_plus.6010.6010.2     | 2                | 25.48 | 0                   | 1.72E+05        |                        | (K)YVSGGQ(K)G G S G S Y I G G I G S I G G G Y I G G I G S S I G (G) | 85.83                | 896.3659         | 1791.728          | -0.0022            | -1.8                     | 8.59      | 39641.8    | 4.93    | HUMAN   | KTQ003 | Keratin, type I cytoskeletal 9                                |
| 11     | dirMS_041712_NAR_60mM_minus.12365.12364.3  | 3                | 25.37 | 1                   | 9.10E+05        |                        | (K)QVEDE(K)K V I D E I A / N M / N K / V I / L E / S R (L)          | 133.75               | 599.9481         | 1797.832          | -0.0008            | -4.5                     | 4.18      | 13588.1    | 4.66    | HUMAN   | FBV067 | Keratin, type II cytoskeletal 8 (Fragment)                    |
| 12     | dirMS_041712_NAR_20mM_plus.18632.18838.2   | 2                | 25.32 | 0                   | 2.48E+05        |                        | (K)YVDDGQ(K)K I V I D D I G L I S A I Q V S R (K)                   | 200.73               | 731.9068         | 1462.815          | -0.0088            | -6                       | 4.21      | 30947.9    | 6.47    | HUMAN   | H3BQ34 | Pyruvate kinase                                               |
| 13     | dirMS_041712_NAR_60mM_plus.15198.15373.3   | 3                | 25.31 | 0                   | 1.86E+06        |                        | (K)IGDGVV(K)K I G I D I V Y V N I D A / F G T A / H R (A)           | 136.52               | 545.6025         | 1634.792          | 0.0008             | 0.5                      | 5.21      | 41827.5    | 7       | HUMAN   | B727A9 | Phosphoglycerate kinase                                       |
| 14     | dirMS_041712_NAR_50mM_plus.15286.15939.3   | 3                | 25.17 | 1                   | 8.82E+06        |                        | (R)ALAEAR(R)K I L A E I A / N M / I L D / P T / P M R (A)           | 154.31               | 581.9697         | 1743.895          | 0                  | 0                        | 4.32      | 76262.2    | 9.53    | HUMAN   | P23246 | Splicing factor, proline- and glutamine-rich                  |
| 15     | dirMS_041712_NAR_20mM_plus.7116.7100.3     | 3                | 25.12 | 0                   | 1.83E+06        |                        | (R)TEAEAR(K)T I E A E I A A M G V T Y T P R (M)                     | 95.58                | 452.5687         | 1355.691          | 0.0021             | 0.1                      | 5.37      | 45578.2    | 7.83    | HUMAN   | B4D1L2 | Isocitrate dehydrogenase [NADP]                               |
| 16     | dirMS_041712_NAR_20mM_minus.12023.12355.2  | 2                | 25.07 | 0                   | 2.70E+06        | M256m                  | (R)SLDMDR(R)S L I D I D I S I I I A / E / V N / R (A)               | 171.22               | 568.8364         | 1320.671          | 15.994             | -0.7                     | 4.03      | 37266.3    | 5.3     | HUMAN   | FBV064 | Keratin, type II cytoskeletal 8                               |
| 17     | dirMS_041712_NAR_60mM_plus.9174.9327.3     | 3                | 24.99 | 1                   | 1.31E+06        |                        | (R)FNEVAA(R)F N I E A I A / Q / V S I D E K I A (K)                 | 106.1                | 543.2616         | 1627.771          | -0.0008            | -0.5                     | 4.68      | 14236.2    | 10.25   | HUMAN   | F5H1P5 | Peptidyl-prolyl cis-trans isomerase NIMA-interacting 4        |
| 18     | dirMS_041712_NAR_30mM_plus.17995.18433.2   | 2                | 24.97 | 0                   | 2.52E+07        |                        | (K)LLGLGA(K)K I L A C I G I L L I A E / R (L)                       | 149.37               | 522.7969         | 1044.587          | -0.0005            | -0.5                     | 6         | 12647.2    | 8.07    | HUMAN   | P14174 | Macrophage migration inhibitory factor                        |
| 19     | dirMS_041712_NAR_60mM_plus.7180.7346.2     | 2                | 24.9  | 1                   | 1.58E+06        |                        | (R)ALPAGAE(R)K A P P I G I A / F I A P K N R (R)                    | 96.2                 | 614.8248         | 1228.643          | -0.001             | -0.8                     | 8.79      | 49379.5    | 8.92    | HUMAN   | FSQVZ3 | Non-PQ domain-containing octamer-binding protein              |
| 20     | dirMS_041712_NAR_30mM_plus.18610.18610.2   | 2                | 24.73 | 0                   | 1.55E+06        |                        | (R)ISEQTR(K)R I S I Q G I T A A W F R (R)                           | 167.08               | 635.3042         | 1229.598          | -0.0008            | -0.6                     | 6         | 42831.5    | 4.86    | HUMAN   | AK8554 | HCC1950A, isoform CRA_1                                       |
| 21     | dirMS_041712_NAR_40mM_minus.12093.12464.3  | 3                | 24.67 | 0                   | 4.82E+05        |                        | (K)QIALTCP(K)K I A I L U T / C P F I I P / P K P K T (T)            | 155.75               | 537.6382         | 1610.898          | 0.0026             | 1.6                      | 8.59      | 49982      | 5.86    | HUMAN   | B4D7D8 | T-complex protein 1 subunit epsilon                           |
| 22     | dirMS_041712_NAR_20mM_minus.12015.12351.2  | 2                | 24.66 | 0                   | 2.70E+06        | M256m                  | (R)SLDMDR(R)S L I D I D I S I I I A / E / V N / R (A)               | 171.22               | 568.8364         | 1320.671          | 15.994             | -0.7                     | 4.03      | 37266.3    | 5.3     | HUMAN   | FBV064 | Keratin, type II cytoskeletal 8                               |
| 23     | dirMS_041712_NAR_120mM_minus.10520.10874.3 | 3                | 24.61 | 1                   | 1.14E+06        |                        | (R)YLAFAER(R)V L I A E I F A T A G T N D R (K)                      | 113.15               | 462.2338         | 1384.688          | -0.0013            | -0.9                     | 6.07      | 12926.1    | 4.4     | HUMAN   | VF7W20 | 14-3-3 protein epsilon (Fragment)                             |
| 24     | dirMS_041712_NAR_50mM_plus.18704.19214.3   | 3                | 24.56 | 1                   | 2.45E+06        |                        | (R)KFTDID(K)K L I I F I I D I G I S L Y R (Q)                       | 133.23               | 451.9379         | 1637.004          | -0.0009            | -0.2                     | 5.81      | 12120.7    | 5.82    | HUMAN   | FBV064 | Paraspeckle-4 (Fragment)                                      |
| 25     | dirMS_041712_NAR_50mM_plus.14519.14660.3   | 3                | 24.54 | 0                   | 6.08E+05        |                        | (R)DLSVCL(R)S I S V I C L S G M A T D M R (Y)                       | 144.83               | 539.5651         | 1616.683          | -0.0024            | -1.5                     | 5.21      | 40613.4    | 5.38    | HUMAN   | PS2597 | Heterogeneous nuclear ribonucleoprotein F                     |
| 26     | dirMS_041712_NAR_40mM_plus.15542.15873.3   | 3                | 24.51 | 1                   | 1.20E+06        |                        | (K)IGDLSGA(K)K V L I D S G I A P I K I P V N I G R (L) G R (I)      | 160.47               | 604.3668         | 1919.096          | -0.0102            | -5.3                     | 6.04      | 53307.5    | 5.25    | HUMAN   | FBV069 | ATP synthase subunit beta                                     |
| 27     | dirMS_041712_NAR_60mM_minus.8992.8956.3    | 3                | 24.48 | 0                   | 3.43E+07        |                        | (K)IQEYDE(K)K E Y D V E / S P / S N / V N / R (K)                   | 110.22               | 506.2391         | 1516.703          | 0.0001             | -0.1                     | 4.65      | 120397.1   | 5.83    | HUMAN   | ASA3E0 | POTE ankyrin domain family member F                           |
| 28     | dirMS_041712_NAR_50mM_plus.18866.18866.3   | 3                | 24.46 | 1                   | 6.40E+06        |                        | (R)SLDMDR(R)S L I D I D I S I I I A / E / V N / R (A)               | 171.22               | 568.8364         | 1320.671          | -0.0048            | -3.1                     | 6.07      | 12120.7    | 5.39    | HUMAN   | FBV068 | Heterogeneous nuclear ribonucleoprotein K                     |
| 29     | dirMS_041712_NAR_20mM_plus.14147.14488.2   | 2                | 24.35 | 0                   | 2.99E+06        | M256m                  | (R)SLDMDR(R)S L I D I D I S I I I A / E / V N / R (A)               | 170.02               | 568.8371         | 1320.673          | 15.9544            | -0.3                     | 4.03      | 37266.3    | 5.3     | HUMAN   | FBV064 | Keratin, type II cytoskeletal 8                               |
| 30     | dirMS_041712_NAR_50mM_plus.18028.18329.3   | 3                | 24.35 | 1                   | 1.46E+06        |                        | (K)YVLDK(K)K V I L D D K / D / M I F / L R (K)                      | 164.12               | 510.6044         | 1529.8            | -0.0012            | -0.8                     | 4.47      | 51899.9    | 4.56    | HUMAN   | B8Z254 | 10 kDa heat shock protein, mitochondrial                      |
| 31     | dirMS_041712_NAR_60mM_minus.8312.8435.3    | 3                | 24.3  | 0                   | 8.83E+05        |                        | (K)YVSYGQ(K)K V S I G V I G D E I E / M D / Q E / G R (V)           | 103.76               | 564.2471         | 1690.73           | -0.0036            | -2.1                     | 4.17      | 19395.5    | 5.38    | HUMAN   | G3V359 | DNA-(apurinic or pyrimidinic) site lase (Fragment)            |
| 32     | dirMS_041712_NAR_60mM_plus.17341.17341.3   | 3                | 24.3  | 1                   | 1.26E+06        |                        | (R)FLGDVIR(K)I V D I Y / V I D / N K / R (R)                        | 148.32               | 505.9247         | 1515.759          | 0.0003             | -0.3                     | 5.96      | 55361.8    | 6.42    | HUMAN   | G3E452 | Protein disulfide isomerase family A, member 3, isoform CRA_b |
| 33     | dirMS_041712_NAR_60mM_minus.13941.14052.3  | 3                | 24.26 | 0                   | 3.54E+05        |                        | (K)DGGATY(K)K G I G A T A / V I G I G K E R (R)                     | 138.02               | 528.9838         | 1586.738          | -0.0012            | -0.7                     | 5.32      | 31075.7    | 5.65    | HUMAN   | PG1074 | Triphosphosphate isomerase                                    |
| 34     | dirMS_041712_NAR_60mM_plus.16586.16586.2   | 2                | 24.25 | 0                   | 7.89E+05        |                        | (R)EHLAAR(K)R H E I A I L A N T / L G V K (R)                       | 143.77               | 657.8735         | 1314.742          | -0.0019            | -1.4                     | 6.85      | 50482.3    | 9.31    | HUMAN   | FB6804 | Elongation factor 1-alpha 1                                   |
| 35     | dirMS_041712_NAR_30mM_minus.7759.8008.2    | 2                | 24.16 | 0                   | 1.38E+08        |                        | (K)AGFAGAE(K)G I F A G I D / D A / P R (A)                          | 98.17                | 488.7304         | 976.448           | 0.0052             | 5.4                      | 4.21      | 120397.1   | 5.83    | HUMAN   | ASA3E0 | POTE ankyrin domain family member F                           |
| 36     | dirMS_041712_NAR_30mM_minus.10293.10293.2  | 2                | 24.11 | 0                   | 2.81E+05        |                        | (R)ETAEAD(R)T I A E I A / N M / I L D / P T / P M R (A)             | 110.08               | 638.3134         | 1275.618          | 0.002              | 1.6                      | 4.14      | 31923.6    | 4.85    | HUMAN   | PT2556 | Tomoponyxin alpha-1 chain                                     |
| 37     | dirMS_041712_NAR_50mM_plus.18566.18561.3   | 3                | 24.08 | 1                   | 5.28E+06        |                        | (K)GTSGVQ(K)K I G I D I V Y V N I D A / F G T A / H R (A)           | 166.27               | 640.3469         | 1910.023          | -0.0001            | -1.6                     | 4.43      | 76262.2    | 9.53    | HUMAN   | B727A9 | Nucleolin                                                     |
| 38     | dirMS_041712_NAR_50mM_plus.20429.20706.3   | 3                | 24.05 | 1                   | 1.95E+06        |                        | (K)SYLNME(K)S I V L N M / D A / N I M E A I / K T (K)               | 177.5                | 542.9473         | 1626.823          | 0.0044             | 2.7                      | 5.79      | 80685.1    | 7.31    | HUMAN   | PS0565 | Propionyl-CoA carboxylase alpha chain, mitochondrial          |
| 39     | dirMS_041712_NAR_30mM_plus.22541.22620.2   | 2                | 24.03 | 0                   | 2.70E+06        |                        | (R)LEGLTD(R)E I G I L T I E I I L A / F L S R (K)                   | 175.42               | 510.3766         | 1419.748          | -0.0019            | -1.3                     | 4.14      | 13588.1    | 4.66    | HUMAN   | FBV067 | Keratin, type II cytoskeletal 8 (Fragment)                    |
| 40     | dirMS_041712_NAR_30mM_plus.16515.16515.2   | 2                | 23.96 | 0                   | 4.38E+05        | M185m                  | (K)I A V N M (K)I A V N M / P P F R (L)                             | 142.67               | 580.3178         | 1143.634          | 15.994             | -0.8                     | 9.75      | 42230.8    | 4.77    | HUMAN   | AMN2C8 | Putative tubulin beta chain-like protein ENSP0000290377       |
| 41     | dirMS_041712_NAR_50mM_plus.18057.18059.3   | 3                | 23.88 | 0                   | 1.47E+06        |                        | (K)SLSAED(K)K L E I E A / N M / I L D / P T / P M R (A)             | 163.75               | 515.6264         | 1652.86           | -0.0009            | -0.9                     | 4.65      | 105417.2   | 6.41    | HUMAN   | C9I2I2 | Nucleolin                                                     |
| 42     | dirMS_041712_NAR_60mM_minus.15860.16146.3  | 3                | 23.86 | 0                   | 5.23E+05        |                        | (R)DFSEER(K)R F I D S E I E A / L A G P K R (E)                     | 148.88               | 514.2713         | 1540.801          | -0.0012            | -0.8                     | 4.68      | 35548.6    | 4.91    | HUMAN   | B4D960 | Asparagine-tRNA ligase, cytoplasmic                           |
| 43     | dirMS_041712_NAR_20mM_plus.17653.17653.2   | 2                | 23.84 | 0                   | 9.58E+04        | M148m                  | (K)TTFAPK(K)T F A P A E E (S)A M I V L T K (M)                      | 193.53               | 776.8996         | 1536.798          | 15.9941            | -0.5                     | 6         | 17549.9    | 4.39    | HUMAN   | E9B149 | Tubulin beta chain                                            |
| 44     | dirMS_041712_NAR_30mM_minus.10792.11262.2  | 2                | 23.79 | 0                   | 6.68E+06        |                        | (R)ISVYVE(R)R S I V Y V I N E A / T G S R (K)                       | 113.98               | 651.322          | 1301.637          | -0.0005            | -2.4                     | 6         | 27549.9    | 4.39    | HUMAN   | EP1814 | Tubulin beta chain                                            |
| 45     | dirMS_041712_NAR_30mM_plus.20410.20809.2   | 2                | 23.78 | 0                   | 4.74E+05        |                        | (R)SLVPAAR(K)R I V I P A A / N T G M I D / D K I (K)                | 102.17               | 642.8602         | 1284.716          | -0.0027            | -0.2                     | 4.53      | 53377.8    | 5.74    | HUMAN   | Q15149 | Plectin                                                       |
| 46     | dirMS_041712_NAR_40mM_minus.11731.11771.2  | 3                | 23.77 | 1                   | 2.86E+06        |                        | (R)IUNPETA(R)R I F T A A N A I G L I D K I V (K)                    | 153.08               | 598.6671         | 1797.899          | -0.0004            | -1.9                     | 6.07      | 19797.7    | 5.16    | HUMAN   | EP9165 | Heat shock cognate 71 kDa protein (Fragment)                  |
| 47     | dirMS_041712_NAR_50mM_minus.13783.13937.3  | 3                | 23.77 | 1                   | 3.91E+05        |                        | (K)YTDIGK(K)K V I T I D I I G I E G V I G P E N L Y (K)             | 146.9                | 618.665          | 1851.997          | -0.0163            | -8.8                     | 4.41      | 26760.7    | 5.95    | HUMAN   | Q13305 | Acetyl-CoA carboxylase 1                                      |
| 48     | dirMS_04                                   |                  |       |                     |                 |                        |                                                                     |                      |                  |                   |                    |                          |           |            |         |         |        |                                                               |



























|      |                                           |   |       |   |               |                                                    |                        |        |            |          |         |       |      |          |       |       |        |                                                               |
|------|-------------------------------------------|---|-------|---|---------------|----------------------------------------------------|------------------------|--------|------------|----------|---------|-------|------|----------|-------|-------|--------|---------------------------------------------------------------|
| 1304 | dirMS_041712_NAR_30mM_plus2.19614.19614.2 | 2 | 17.5  | 0 | 2.87E-04      | (K)NIGALP(K)N(Q)A(L)P/P A C V L(K)N                | C:Carbamidomethylation | 157.75 | 630.8399   | 1260.677 | -0.0044 | -3.5  | 8.75 | 834006.6 | 6.82  | HUMAN | Q29499 | ATP-dependent RNA helicase DDX1                               |
| 1305 | dirMS_041712_NAR_30mM_plus2.7254.7254.1   | 2 | 17.5  | 0 | 6.31E-05      | (K)FGQGSQ(K)S F(I)Q(D)S(L)S/R(D)                   |                        | 99.8   | 520.2659   | 1039.517 | 0.0078  | -7.5  | 4.97 | 100478.9 | 5.71  | HUMAN | ABM099 | Matrin-3                                                      |
| 1306 | dirMS_041712_NAR_50mM_plus2.14835.14835.3 | 2 | 17.5  | 0 | 6.51E-05      | (K)GAPPL(K)K(L)E(V)S(L)M(L)K(A)G(Q)K(Q)            |                        | 147.8  | 509.2929   | 1490.613 | -0.0017 | -8.0  | 4.49 | 159613.3 | 6.75  | HUMAN | Q95913 | DBP5 complex subunit KIAA1967 (Fragment)                      |
| 1307 | dirMS_041712_NAR_60mM_plus.17727.17899.3  | 3 | 17.5  | 1 | 4.14E-05      | (R)RFDQD(R)R D D G T G Q(L)L(L)P L(S) V D(A)R(K)   |                        | 150.38 | 576.3609   | 1726.908 | -0.0021 | -1.2  | 4.43 | 533778.9 | 5.74  | HUMAN | Q15149 | Plectin                                                       |
| 1308 | dirMS_041712_NAR_20mM_minus.14653.14653.2 | 2 | 17.49 | 0 | 2.10E-05      | (K)LAVALK(K)L A(L)E(L)S(L)D G(D) L A(G)R(Y)        |                        | 201.28 | 793.922    | 1586.838 | -0.0017 | -1.1  | 4.03 | 24286.7  | 4.89  | HUMAN | G3V4N7 | Creatine kinase B-type (Fragment)                             |
| 1309 | dirMS_041712_NAR_20mM_minus.7656.7656.2   | 2 | 17.49 | 0 | 6.65E-05 M23m | (K)VEVDE(K)K(V)I D E Q(M)N(L)N(V)G(L)N(K)N         | m:Disulfide methionine | 125.12 | 731.843    | 1446.689 | 15.9894 | -3.8  | 4.14 | 40069.4  | 4.83  | HUMAN | E7EWR1 | Tubulin beta chain                                            |
| 1310 | dirMS_041712_NAR_50mM_plus2.22324.22324.3 | 3 | 17.49 | 1 | 1.35E-06      | (K)EGGGLG(K)G G(L)G/LN(L)P(L)A D V T T R(K)        |                        | 191    | 631.289    | 1093.656 | -0.0035 | -1.5  | 6.17 | 15522.2  | 5.82  | HUMAN | ABN045 | Perforin domain 2, isoform CRA_a                              |
| 1311 | dirMS_041712_NAR_60mM_plus.18891.19267.3  | 3 | 17.49 | 1 | 1.21E-06      | (R)EGVDT(N)E(G)I V(L)T/LN(L)E E A J R(K)           |                        | 157.1  | 572.9538   | 1716.876 | 0.0006  | 0.3   | 4.25 | 7898     | 11.1  | HUMAN | PC6287 | 40S ribosomal protein S28                                     |
| 1312 | dirMS_041712_NAR_20mM_plus.10867.11339.2  | 2 | 17.48 | 0 | 2.99E-06      | (K)GNVNA(K)D V(N)A(L)A/T(N)T(K)                    |                        | 150.08 | 508.292    | 1015.578 | -0.0015 | -1.5  | 5.84 | 58642    | 4.95  | HUMAN | F5H5D3 | Tubulin alpha-1C chain                                        |
| 1313 | dirMS_041712_NAR_30mM_plus2.7254.7250.2   | 2 | 17.48 | 0 | 4.29E-05      | (R)YVYNS(R)Y(V)S(A)N(S)G(A)R(I)                    |                        | 92.9   | 519.2668   | 1037.537 | -0.011  | -10.7 | 8.75 | 26744.2  | 7.15  | HUMAN | K7E6A4 | Acetyl-CoA carboxylase 1 (Fragment)                           |
| 1314 | dirMS_041712_NAR_50mM_plus2.9840.9840.3   | 3 | 17.48 | 1 | 1.04E-06      | (K)IKGATG(K)K E(V)A(T)S(V)G(L)P/P S A(K)A          |                        | 119.12 | 534.6155   | 1661.838 | -0.0061 | -3.7  | 4.56 | 53724.2  | 9.54  | HUMAN | HB97E7 | RNA-binding protein FUS                                       |
| 1315 | dirMS_041712_NAR_20mM_minus.11338.11316.3 | 3 | 17.48 | 0 | 4.00E-05      | (K)ITTEVEI(K)T T L E V E(L)S(L)P V D(A)K(Q)        |                        | 187.4  | 609.647    | 1797.927 | -0.0017 | -3.1  | 4.43 | 17271.6  | 6.75  | HUMAN | BD4012 | Ubiquitin                                                     |
| 1316 | dirMS_041712_NAR_120mM_plus.5512.5550.3   | 3 | 17.47 | 0 | 7.03E-05      | (R)TSTETE(R)S(T)F(E)E(L)H(A)G N(R)K(D)             |                        | 82.03  | 421.5315   | 1262.576 | 0.0039  | 3.1   | 5.38 | 160853.1 | 6.11  | HUMAN | F8VU51 | YLP motif-containing protein 1                                |
| 1317 | dirMS_041712_NAR_20mM_plus.14768.14768.2  | 2 | 17.47 | 0 | 1.10E-05      | (K)ILGELG(K)L(G)E(L)G(L)Q D N(A)K(Q)               |                        | 173.65 | 607.3421   | 1213.679 | -0.0018 | -1.4  | 4.37 | 35566.4  | 9.3   | HUMAN | F22393 | Transaldolase                                                 |
| 1318 | dirMS_041712_NAR_30mM_plus2.18871.18912.2 | 2 | 17.47 | 0 | 2.41E-05      | (R)ILPNP(R)I(L)F(N)D(V)Q(T) L(K)D                  |                        | 152.38 | 595.8347   | 1190.678 | -0.0158 | -13.3 | 5.84 | 81007.1  | 6.31  | HUMAN | E9PW16 | Plectin (Fragment)                                            |
| 1319 | dirMS_041712_NAR_30mM_plus2.5977.5990.2   | 2 | 17.47 | 0 | 5.36E-06      | (K)GIVGK(K)S Y(S)S(A)G(S)S V S(R)K                 |                        | 85.65  | 572.7654   | 1144.523 | -0.0014 | -1.2  | 8.46 | 26261.9  | 9.78  | HUMAN | F5QW6E | Cleavage and polyadenylation-specificity factor subunit 7     |
| 1320 | dirMS_041712_NAR_30mM_plus2.7684.7752.2   | 2 | 17.47 | 0 | 8.54E-05      | (K)GNPNV(K)G(A)N(L)P(E)R(K)                        |                        | 494.2  | 428.241    | 855.468  | 0.0064  | 7.5   | 6    | 17213.7  | 10.05 | HUMAN | B72712 | 60 kDa heat shock protein, mitochondrial                      |
| 1321 | dirMS_041712_NAR_30mM_plus2.8708.8926.2   | 2 | 17.47 | 0 | 2.54E-06      | (K)YDQEE(K)I(D)I(V)D E L(N)K(T)                    |                        | 99.85  | 576.2833   | 1151.558 | -0.0014 | 1.2   | 4.14 | 85057.6  | 4.94  | HUMAN | P07900 | Heat shock protein HSP 90-alpha                               |
| 1322 | dirMS_041712_NAR_40mM_plus2.12275.12275.3 | 3 | 17.47 | 0 | 2.19E-05      | (K)AASDA(K)A A(S)D(A)M T E U P P T H P R(I)R       |                        | 139.18 | 607.3167   | 1819.937 | -0.0015 | -0.9  | 5.32 | 12926.1  | 4.4   | HUMAN | Q79670 | 14-3-3 protein epsilon (Fragment)                             |
| 1323 | dirMS_041712_NAR_40mM_plus2.18946.20032.3 | 3 | 17.47 | 1 | 1.55E-06      | (R)ELALR(L)R L(A)U(L)E(L)M U D P A E K D F E(K)G   |                        | 189.1  | 629.803    | 1884.999 | -0.0042 | -2.3  | 4.18 | 25148.6  | 6     | HUMAN | P30041 | Perforin-doxin-5                                              |
| 1324 | dirMS_041712_NAR_50mM_plus2.11371.11477.3 | 3 | 17.47 | 1 | 1.25E-06      | (K)NQYAM(K)N Q(L)V(A)M(N)P(T)N V F D A(K)R(L)      |                        | 127.8  | 602.6354   | 1805.896 | -0.0046 | -2.6  | 8.75 | 20069.4  | 6.74  | HUMAN | EP9K54 | Heat shock cognate 71 kDa protein (Fragment)                  |
| 1325 | dirMS_041712_NAR_50mM_minus.18793.18879.3 | 3 | 17.46 | 1 | 2.24E-06      | (R)IUALLEV(R)I(L)A(L)E(L)N V L S(Q)M(R)K           |                        | 183.72 | 461.6289   | 1382.873 | -0.0008 | -0.6  | 8.75 | 280326.9 | 5.48  | HUMAN | U57369 | Filamin-B                                                     |
| 1326 | dirMS_041712_NAR_20mM_plus.12262.12262.2  | 2 | 17.46 | 0 | 4.61E-04      | (K)VALSEE(K)A(L)S(E)E T E V(A)A(L)A(R)D(I)         |                        | 162.72 | 673.3693   | 1345.732 | -0.0006 | -0.6  | 4.53 | 246695.2 | 5.91  | HUMAN | E7EVR0 | Microtubule-associated protein                                |
| 1327 | dirMS_041712_NAR_30mM_plus2.12946.12946.2 | 2 | 17.46 | 0 | 3.14E-05      | (K)QDQDE(K)K(Q)I(L)Q(S) Q(S)S V(L)R(L)             |                        | 100.6  | 576.3889   | 1457.771 | 0.0008  | 0.4   | 6    | 14855.1  | 9.26  | HUMAN | SLA1D0 | NHP2 non-histone chromatin protein 2-like 1 (S. cerevisiae)   |
| 1328 | dirMS_041712_NAR_50mM_plus2.81938.8198.3  | 3 | 17.46 | 0 | 7.80E-04      | (K)QFVDE(K)K(E)Y(D)E(S)G(L)P V H(R)K               |                        | 159.4  | 506.2382   | 1516.703 | -0.0026 | -1.9  | 4.65 | 123097.1 | 6.44  | HUMAN | AS4300 | POTE ankyrin domain family member F                           |
| 1329 | dirMS_041712_NAR_30mM_minus.19123.19123.2 | 2 | 17.45 | 0 | 2.61E-05      | (K)SYFLPE(K)S Y(E)L)P D Q V(L)G T(N E)R(I)         |                        | 188.88 | 895.9492   | 1790.892 | -0.0008 | -0.4  | 4.14 | 123097.1 | 5.83  | HUMAN | AS4300 | POTE ankyrin domain family member F                           |
| 1330 | dirMS_041712_NAR_60mM_minus.18441.18594.3 | 3 | 17.45 | 0 | 2.26E-06      | (R)IHFPLA(R)H F P P A(T)T(Y)P(V)S(A) E A(K)A       |                        | 105.67 | 586.3248   | 1756.963 | -0.0034 | -1.9  | 6.75 | 49012.3  | 4.9   | HUMAN | ABM081 | Tubulin alpha-4A chain                                        |
| 1331 | dirMS_041712_NAR_60mM_minus.5071.5276.3   | 3 | 17.45 | 0 | 3.20E-06      | (R)AEAE(K)A E(E)A(L)A(G)S F R P D(R)K              |                        | 81.35  | 451.5562   | 1325.655 | -0.0017 | -0.9  | 4.68 | 558007.1 | 5.84  | HUMAN | PS8107 | Epipkatin                                                     |
| 1332 | dirMS_041712_NAR_30mM_plus2.15301.15421.3 | 3 | 17.45 | 0 | 9.39E-05      | (K)GIVGK(K)S Y(S)S(A)G(S)S V S(R)K                 |                        | 132.57 | 587.9838   | 1322.659 | -0.0017 | -4.1  | 4.14 | 105442.2 | 5.84  | HUMAN | Q15149 | Guanine nucleotide-binding protein subunit beta-2-like 1      |
| 1333 | dirMS_041712_NAR_30mM_plus2.18383.18417.2 | 2 | 17.45 | 0 | 2.22E-05      | (K)GVEGK(K)S V(L)G(L)I(L)D(V)G(L)P(V)R             |                        | 145.45 | 713.3669   | 1425.733 | -0.0067 | -4.7  | 4.14 | 20629.7  | 8.44  | HUMAN | Q13442 | 28 kDa heat- and acid-stable phosphoprotein                   |
| 1334 | dirMS_041712_NAR_30mM_plus2.9098.9629.2   | 2 | 17.45 | 0 | 1.04E-06      | (R)ILSGVV(R)I(L)S(G) V V V T T(K)                  |                        | 102.98 | 408.7614   | 816.519  | -0.0014 | -4.2  | 8.75 | 18601.6  | 10.52 | HUMAN | PC6280 | 40S ribosomal protein S11                                     |
| 1335 | dirMS_041712_NAR_50mM_plus2.16336.16568.3 | 3 | 17.45 | 0 | 7.81E-06      | (R)YSVDW(R)R(V)S(L)D(V)N(H)A P D E L T V(K)T       |                        | 154.68 | 595.312    | 1783.922 | -0.001  | -0.6  | 4.54 | 20576.9  | 9.84  | HUMAN | F8W0U4 | Heat shock protein beta-1                                     |
| 1336 | dirMS_041712_NAR_30mM_plus.14051.14221.3  | 3 | 17.44 | 1 | 1.97E-06      | (R)YSAE(R)S(L)A(N)E(L)S(L)P(L)R(L)A(R)             |                        | 175.75 | 616.9683   | 1653.893 | -0.0015 | -0.9  | 4.68 | 12056.6  | 6.96  | HUMAN | PC6167 | Pteridine-4-carboxylamide dehydratase                         |
| 1337 | dirMS_041712_NAR_60mM_minus.19501.19501.3 | 3 | 17.44 | 1 | 1.39E-06      | (K)EIDU(L)K(E)I(Q)U(L)A D R I(N)R(L)               |                        | 180.2  | 452.2739   | 1354.805 | -0.0014 | -1.4  | 4.56 | 58642    | 4.95  | HUMAN | F5H5D3 | Tubulin alpha-1C chain                                        |
| 1338 | dirMS_041712_NAR_40mM_plus2.19253.19253.3 | 3 | 17.44 | 1 | 1.93E-05      | (K)TSAQV(K)T S(A)Q(N)V L D G L V D K I G D P(K)C   |                        | 180.37 | 619.6811   | 1857.033 | -0.004  | -2.2  | 4.43 | 22702.2  | 8.26  | HUMAN | Q14008 | Cytoskeleton-associated protein 5                             |
| 1339 | dirMS_041712_NAR_50mM_plus2.13659.13660.3 | 3 | 17.44 | 0 | 1.68E-06      | (K)IDLAG(K)K(D)L(A)G(C)H(N)G L S N V(K)R           |                        | 140.15 | 461.9061   | 1381.705 | -0.0012 | -0.8  | 6.74 | 45578.2  | 7.83  | HUMAN | BD41L2 | Isochorate dehydrogenase [NADP]                               |
| 1340 | dirMS_041712_NAR_60mM_plus.11692.11840.3  | 3 | 17.44 | 0 | 9.22E-06      | (R)FAGHTR(P)A Q H S T V(G)Y(E)I(S) Q R(W)          |                        | 118.63 | 588.265    | 1762.782 | -0.0015 | -0.9  | 5.4  | 26419.2  | 5.11  | HUMAN | HD0987 | Splicing factor, proline- and glutamine-rich (Fragment)       |
| 1341 | dirMS_041712_NAR_30mM_plus2.18398.18398.2 | 2 | 17.43 | 0 | 3.70E-05      | (K)SGVVEE(K)R(S)G(E)S(L)P S V R(R)K                |                        | 149.38 | 661.8002   | 1322.659 | -0.0025 | -4.2  | 4.25 | 533778.9 | 5.74  | HUMAN | Q15149 | Plectin                                                       |
| 1342 | dirMS_041712_NAR_30mM_plus2.22006.22006.2 | 2 | 17.43 | 0 | 2.09E-05      | (K)SGVLE(K)K(S)G(L)E(L)G(L)T L N A(K)V(Q)          |                        | 170.27 | 707.8889   | 1414.79  | -0.0155 | -13.8 | 6    | 31075.7  | 5.65  | HUMAN | PG0274 | Triosephosphate isomerase                                     |
| 1343 | dirMS_041712_NAR_30mM_plus2.22226.22226.2 | 2 | 17.43 | 0 | 5.52E-05      | (K)GFPWSP(K)G(P)P/S V S(R)K                        |                        | 173    | 522.8032   | 1104.584 | 0.0155  | 1.4   | 6    | 71218.8  | 6.3   | HUMAN | A7YJ18 | Radixin                                                       |
| 1344 | dirMS_041712_NAR_30mM_minus.13195.13346.2 | 2 | 17.42 | 0 | 7.20E-05      | (K)YGVSY(K)G(V)S(L)P G P T U(L)R(K)                |                        | 125.7  | 542.7876   | 1104.567 | 0.0006  | 0.5   | 8.5  | 55361.8  | 6.42  | HUMAN | G5E422 | Protein disulfide isomerase family A, member 3, isoform CRA_b |
| 1345 | dirMS_041712_NAR_30mM_minus.12114.12428.3 | 3 | 17.42 | 1 | 7.28E-06      | (R)YVHSG(R)Y(V)S(L)P G P T U(L)R(K)                |                        | 156.2  | 633.197185 | 1671.007 | -0.0016 | -1.9  | 4.32 | 20679.7  | 6.45  | HUMAN | AS4300 | 26S proteasome non-ATPase regulatory subunit 4 (Fragment)     |
| 1346 | dirMS_041712_NAR_40mM_plus2.14275.14275.3 | 3 | 17.42 | 0 | 1.20E-05      | (R)TGIDTTS(R)T G(E)I V T S F P G L D E K D L V(R)R |                        | 168.55 | 650.3366   | 1948.997 | -0.0022 | -1.1  | 4.22 | 35067    | 5.55  | HUMAN | E7ETRO | RuvB-like 1                                                   |
| 1347 | dirMS_041712_NAR_50mM_minus.10711.10711.3 | 3 | 17.42 | 0 | 1.79E-05      | (R)ILLELGR(K)I(L)E(L)G P K P E(L)A(Q)Q(T)R(K)      |                        | 128.88 | 560.3182   | 1678.949 | -0.0086 | -5.1  | 6.14 | 139883.7 | 8.06  | HUMAN | PS3621 | Cotactin subunit alpha                                        |
| 1348 | dirMS_041712_NAR_60mM_minus.9552.9558.3   | 3 | 17.42 | 0 | 2.61E-05      | (K)GWFSE(K)G(I)VE(L)F(S)G(L)P D G(K)R              |                        | 113.3  | 411.2274   | 1231.679 | -0.0117 | -0.9  | 8.75 | 23729.5  | 9.89  | HUMAN | C9K217 | Non-POU domain-containing octamer-binding protein (Fragment)  |
| 1349 | dirMS_041712_NAR_120mM_plus.20402.21019.4 | 4 | 17.42 | 1 | 3.37E-06      | (R)DYHGLR(R)Y(L)N(L)P(L)P(L)R(L)F R(S)R            |                        | 162.23 | 473.2689   | 1890.06  | -0.0056 | -3.1  | 6.75 | 19304.8  | 9.99  | HUMAN | F6U211 | 40S ribosomal protein S10                                     |
| 1350 | dirMS_041712_NAR_30mM_plus2.13763.13885.2 | 2 | 17.42 | 0 | 6.06E-05      | (K)GIVGK(K)S Y(S)S(A)G(S)S V S(R)K                 |                        | 125.55 | 590.8136   | 1180.621 | -0.0019 | -0.8  | 4.53 | 11367.1  | 11.36 | HUMAN | PC6205 | Histone H4                                                    |
| 1351 | dirMS_041712_NAR_50mM_plus2.17754.17764.3 | 3 | 17.42 | 0 | 2.72E-05      | (R)IGELG(R)I(G)I(E)G L S L N V L(K)K               |                        | 161.6  | 464.946    | 1392.821 | -0.0025 | -1.8  | 6.75 | 177928   | 5.42  | HUMAN | Q9NYU2 | UDP-glucose-glycoprotein glucosyltransferase 1                |
| 1352 | dirMS_041712_NAR_50mM_minus.8808.8808.3   | 3 | 17.41 | 0 | 2.36E-05      | (R)YVMEG(R)Y                                       |                        |        |            |          |         |       |      |          |       |       |        |                                                               |



|      |                                           |   |       |                 |                                                     |        |          |           |         |      |      |          |       |       |        |                                                                     |
|------|-------------------------------------------|---|-------|-----------------|-----------------------------------------------------|--------|----------|-----------|---------|------|------|----------|-------|-------|--------|---------------------------------------------------------------------|
| 1522 | dirMS_041712_NAR_60mM_minus.9506.9506.3   | 3 | 17.11 | 0.139E+05       | (RIQLSQDQ)RL/S/QA/G/S/F/S/D/G/T/H/G/L/R             | 11352  | 573.2781 | 1717.8225 | -0.0055 | -3.2 | 6.74 | 266161   | 6.88  | HUMAN | EPSPD0 | Epiplakin                                                           |
| 1523 | dirMS_041712_NAR_20mM_plus.15561.15562.1  | 2 | 17.11 | 0.237E+05       | (KHTLLE)K(T)T(L)E(V)E(I)P(S)D(T)E(N)K(R)            | 17903  | 894.4658 | 1787.927  | -0.003  | -1.7 | 4    | 17271.6  | 6.75  | HUMAN | BADP12 | Ubiquitin                                                           |
| 1524 | dirMS_041712_NAR_40mM_plus.13008.13008.3  | 3 | 17.11 | 0.236E+05       | (KALVSVS)K(R)N(V)I/S/L/S/Q/L/Q/T/T/L/R(L)           | 14142  | 574.2527 | 1720.927  | -0.0009 | 0.5  | 8.73 | 45024.9  | 6.74  | HUMAN | P185F4 | Regulator of chromosome condensation                                |
| 1525 | dirMS_041712_NAR_40mM_plus.12422.12422.3  | 3 | 17.1  | 1.173E+05       | (KINIMDE)K(N)N/A/D/S/D/P/K/Y/I/N/V/K(R)             | 13907  | 611.3255 | 1831.98   | -0.001  | -9.9 | 4.56 | 14693.3  | 4.69  | HUMAN | C9I59  | 26S protease regulatory subunit 7 (Fragment)                        |
| 1526 | dirMS_041712_NAR_50mM_plus.1262.11362.3   | 3 | 17.1  | 1.125E+06       | (KJNVGM)K(Q)G(V)A/M/N/P/T/N/V/P/D/A/R(L)            | 1728   | 602.6354 | 1805.896  | -0.0046 | -2.6 | 8.75 | 20069.4  | 6.74  | HUMAN | EPK54  | Heat shock cognate 71 kDa protein (Fragment)                        |
| 1527 | dirMS_041712_NAR_60mM_plus.12356.12356.3  | 3 | 17.1  | 1.768E+05       | (KIVGDS)K(Q)G(V)A/S/E/V/V/V/V/V/K(R)                | 12122  | 427.9427 | 1491.817  | -0.003  | -2   | 6.07 | 28815.3  | 9.52  | HUMAN | B4E2X2 | Cold-inducible RNA-binding protein                                  |
| 1528 | dirMS_041712_NAR_20mM_minus.10688.10688.2 | 2 | 17.09 | 0.200E+05       | (RITTSV)K(R)T(T)S/P/A/V/P/A/T/F(T)R(L)              | 15437  | 744.2547 | 1482.700  | 0.0009  | 0.6  | 4.97 | 35832.6  | 6.95  | HUMAN | FRV8X  | Heat shock protein 70 kDa protein                                   |
| 1529 | dirMS_041712_NAR_30mM_minus.10248.10248.2 | 2 | 17.09 | 0.399E+05       | (KATAVAO)K(K)A(V)N(Q)I/V/G/A/N/R(K)                 | 10993  | 483.7645 | 978.255   | -0.0037 | -3.8 | 5.88 | 15252.2  | 5.82  | HUMAN | AKNWS5 | Peroxiredoxin 2, isoform CRA_a                                      |
| 1530 | dirMS_041712_NAR_30mM_minus.7601.7601.2   | 2 | 17.09 | 0.810E+04       | (RSD)EGL)R(D)E(G)Q/V(S)P/A/F(R)K                    | 95.82  | 580.7788 | 1160.554  | -0.0039 | -3.3 | 4.37 | 81007.1  | 6.31  | HUMAN | EPMV1  | Plectin (Fragment)                                                  |
| 1531 | dirMS_041712_NAR_120mM_plus.19549.19708.4 | 4 | 17.09 | 1.315E+06       | (RIFRHH)R(F)R H V H N I E I L S / L A / L K (R)     | 15595  | 432.4918 | 1726.949  | -0.0033 | -1.9 | 6.75 | 20931.1  | 10.28 | HUMAN | DRK4N4 | 60S ribosomal protein L9 (Fragment)                                 |
| 1532 | dirMS_041712_NAR_30mM_plus.17525.17570.2  | 2 | 17.09 | 0.164E+05       | (RIFSEHA)K(R)S/A/E/A/J/A/D/A/D/A/G/K(Q)             | 14503  | 672.8406 | 1344.675  | -0.0015 | -1.1 | 4.14 | 56607.4  | 5.37  | HUMAN | FRV8X  | Keratin, type I cytoskeletal 8                                      |
| 1533 | dirMS_041712_NAR_50mM_plus.2044.2044.3    | 3 | 17.09 | 0.204E+05       | (KJIAHPT)K(K)I(I)N(Q)G/V(L)G/A/V/K(Q)               | 13314  | 479.491  | 1000.45   | -0.0019 | -1.1 | 8.54 | 47949.9  | 9.16  | HUMAN | ATP    | ATP-binding cassette sub-family E member 1                          |
| 1534 | dirMS_041712_NAR_50mM_plus.19845.19895.3  | 3 | 17.09 | 1.531E+05       | (-IMDELQ) (-)IMD(E)I/LQ/LF/R/D/T/V/LA/K(G)          | 17323  | 593.3209 | 1777.952  | -0.0035 | -2   | 4.56 | 18601.1  | 5.1   | HUMAN | CN2A5  | Transitional endoplasmic reticulum ATPase (Fragment)                |
| 1535 | dirMS_041712_NAR_60mM_plus.5351.5538.3    | 3 | 17.09 | 0.154E+06       | (RJAFAEA)K(R)A(E)A/G/S/R/P/D/R(K)                   | 85.88  | 451.5555 | 1352.655  | -0.0034 | -2.5 | 4.68 | 588007.1 | 5.44  | HUMAN | PS8I07 | Epiplakin                                                           |
| 1536 | dirMS_041712_NAR_30mM_plus.14311.14311.2  | 2 | 17.08 | 0.971E+05       | (RIMGOM)K(R)M(Q)M(I)M(A)M(G)M(N)R(R)                | 17323  | 769.8376 | 1538.67   | -0.0015 | -1   | 9.5  | 43979.5  | 8.92  | HUMAN | FSG23  | Non-POU domain-containing octamer-binding protein                   |
| 1537 | dirMS_041712_NAR_30mM_plus.15992.15374.2  | 2 | 17.08 | 0.182E+05       | (KILWTL)K(L)W(I)N(T)G/V(C)K(Q)                      | 132.65 | 545.1267 | 1092.571  | 0.0059  | 5.5  | 8.75 | 33029.4  | 9.62  | HUMAN | DBR0L0 | Guanine nucleotide-binding protein subunit beta-2-like 1 (Fragment) |
| 1538 | dirMS_041712_NAR_50mM_plus.18985.19262.3  | 3 | 17.08 | 0.588E+05       | (RIGFGIT)R(F)G(F)I(T)F/NP/E/H/A/S/V/A/R(K)          | 168.7  | 661.3258 | 1981.959  | -0.004  | -2   | 6.75 | 17170.1  | 8.86  | HUMAN | PSR179 | Putative RNA-binding protein                                        |
| 1539 | dirMS_041712_NAR_20mM_minus.12249.12487.3 | 3 | 17.07 | 0.833E+05 M73m  | (RJAIVLD)K(R)A(V)I(L)D/LP/T(T)M/D(S/V)R(S)          | 1757   | 539.9423 | 1601.82   | 15.992  | -1.8 | 4.03 | 13112.4  | 5.23  | HUMAN | FRW813 | Tubulin beta-8 chain                                                |
| 1540 | dirMS_041712_NAR_30mM_minus.16032.16300.3 | 3 | 17.07 | 1.443E+06       | (RIVSEFLP)K(R)S(V)E/LF/LA/D & V/P/K(T)              | 152.57 | 460.5908 | 1379.757  | 0.0009  | -0.7 | 6.04 | 13378.8  | 6.27  | HUMAN | CN357  | Peptidyl-prolyl cis-trans isomerase                                 |
| 1541 | dirMS_041712_NAR_60mM_minus.6036.6037.3   | 3 | 17.07 | 1.271E+06       | (KIDSVPG)K(D)S(F)V(G)E/LA/Q/S/K(R)                  | 98.57  | 452.2129 | 1354.623  | 0.0008  | 0.6  | 4.56 | 32616.5  | 5.18  | HUMAN | AKN176 | Actin, alpha skeletal muscle                                        |
| 1542 | dirMS_041712_NAR_20mM_plus.18352.18352.2  | 2 | 17.07 | 0.195E+05       | (RJAJVAE)K(R)A & E VGV(I)V(L)G G C A L U/R(K)       | 197.9  | 842.9549 | 1684.905  | -0.0025 | -1.5 | 4.53 | 61224.7  | 5.7   | HUMAN | P10809 | 60 kDa heat shock protein, mitochondrial                            |
| 1543 | dirMS_041712_NAR_30mM_plus.17036.17145.2  | 2 | 17.07 | 0.376E+04 M185m | (KJALVN)K(K)A(I)A/V(L)P/G(L)K                       | 142.12 | 580.3176 | 1143.634  | 15.9936 | -1.1 | 9.75 | 42230.8  | 4.77  | HUMAN | AKN628 | Putative tubulin beta chain-like protein ENSP000029037              |
| 1544 | dirMS_041712_NAR_50mM_minus.14186.14245.3 | 3 | 17.06 | 0.261E+05       | (RITVCE)R(T)I(Q)I(V)E N S H L/U/L/T/L & G A L N(K)V | 449.0  | 660.367  | 1979.092  | -0.0056 | -2.8 | 6.41 | 267260.7 | 5.95  | HUMAN | Q13085 | Actinyl-CoA carboxylase 1                                           |
| 1545 | dirMS_041712_NAR_30mM_plus.8713.8713.3    | 3 | 17.06 | 1.214E+05       | (RIVAEPR)K(R)A(I)E(P)S/AP/R/E/D/F & C(K)            | 117.37 | 611.2923 | 1831.864  | -0.0002 | -1.1 | 4.41 | 36856.1  | 6.95  | HUMAN | HD0144 | Sorbitol dehydrogenase                                              |
| 1546 | dirMS_041712_NAR_60mM_minus.18774.18774.3 | 3 | 17.06 | 1.285E+05       | (RIGDSTO)R(E)K(Q)I(F)S/V(L)A/V/E/K(R)               | 159.2  | 569.9599 | 1707.855  | 0.0013  | -0.8 | 4.41 | 144109.9 | 6.01  | HUMAN | FRV8X  | Keratin, heavy chain 2                                              |
| 1547 | dirMS_041712_NAR_30mM_plus.6894.6894.2    | 2 | 17.06 | 0.731E+04       | (RIVNTP)R(E)N(P)N/D/S/R(R)                          | 90.4   | 522.2255 | 1043.443  | 0.0009  | 0.8  | 4.37 | 193379.8 | 5.48  | HUMAN | Q00610 | Claflarin heavy chain 1                                             |
| 1548 | dirMS_041712_NAR_20mM_minus.13984.13984.2 | 2 | 17.05 | 0.681E+05       | (RINLTD)R(L)N(I)T(T)D/L/A/R(K)                      | 192.22 | 557.8438 | 1114.683  | -0.0027 | -2.4 | 5.81 | 41517.9  | 5.45  | HUMAN | FE7C62 | Eukaryotic initiation factor 4A-II                                  |
| 1549 | dirMS_041712_NAR_30mM_plus.19782.19782.2  | 2 | 17.05 | 0.353E+05       | (KIDSNV)K(S)N(N)N/E(W)D/W/V(L)K(Q)                  | 156.98 | 667.2025 | 1354.641  | -0.0072 | -5.4 | 4.37 | 18511.8  | 5.62  | HUMAN | DBR070 | Endonuclear nucleolar ribonucleoprotein H (Fragment)                |
| 1550 | dirMS_041712_NAR_40mM_plus.17732.17732.3  | 3 | 17.05 | 1.190E+05       | (RIVSPR)K(K)K(L)P(S)D(V)P/V/V/P/K(Q)                | 102.17 | 501.1267 | 1589.991  | -0.002  | -1.1 | 4.37 | 20157.9  | 6.95  | HUMAN | FRV8X  | Mitochondrial nuclear import receptor subunit TOM34                 |
| 1551 | dirMS_041712_NAR_60mM_plus.13079.13542.3  | 3 | 17.05 | 1.886E+05       | (KIDNRE)K(R)W(D)R & L E I/LQ/LF/Q/R(K)              | 87.85  | 520.952  | 1560.849  | -0.0078 | -5   | 6.04 | 53377.8  | 5.74  | HUMAN | Q15149 | Plectin                                                             |
| 1552 | dirMS_041712_NAR_20mM_minus.12216.12552.3 | 3 | 17.04 | 0.833E+05 M73m  | (RJAIVLD)K(R)A(V)I(L)D/LP/T(T)M/D(S/V)R(S)          | 1757   | 539.9423 | 1601.82   | 15.992  | -1.8 | 4.03 | 13112.4  | 5.23  | HUMAN | FRW813 | Tubulin beta-8 chain                                                |
| 1553 | dirMS_041712_NAR_50mM_plus.14263.14263.3  | 3 | 17.04 | 1.662E+05       | (RIVEKIP)K(R)E(V)K(V)G D(I)E/D/S/V(L)R(I)G          | 147.1  | 595.6534 | 1784.958  | -0.0118 | -6.6 | 4.68 | 56186.7  | 5.47  | HUMAN | B4DUR8 | T-complex protein 1 subunit gamma                                   |
| 1554 | dirMS_041712_NAR_30mM_plus.8231.8231.3    | 3 | 17.04 | 1.192E+05       | (RIVSDE)K(S)Q(V)E/LA/Q/S/K(R)                       | 98.57  | 452.2129 | 1354.623  | 0.0008  | -0.1 | 4.75 | 26288.9  | 5.24  | HUMAN | AKN628 | Putative tubulin beta chain-like protein ENSP000029037              |
| 1555 | dirMS_041712_NAR_30mM_plus.19187.19507.2  | 2 | 17.04 | 0.411E+06       | (KITGLIK)K(T)L(E)I/LQ/LF/R(K)                       | 156.62 | 450.2857 | 899.567   | -0.0032 | -3.5 | 9.41 | 57391.2  | 6.29  | HUMAN | Q43175 | D-3-phosphoglycerate dehydrogenase                                  |
| 1556 | dirMS_041712_NAR_30mM_minus.13847.13890.2 | 2 | 17.03 | 0.308E+05 M313m | (KIDNLE)K(S)N(S)I(E)S(V)N(F)N(N)K(A)                | 128.9  | 660.3011 | 1303.599  | 15.9962 | -1   | 6    | 45508.6  | 5.5   | HUMAN | AKN702 | Heat shock cognate 71 kDa protein                                   |
| 1557 | dirMS_041712_NAR_40mM_minus.12336.12461.3 | 3 | 17.03 | 1.287E+05       | (KIDVAKE)K(K)D(V)A(I)I(E)P(L)D(V)D/P/K(Q)           | 156.13 | 546.3068 | 1636.916  | -0.0098 | -6   | 4.23 | 24376.8  | 6.08  | HUMAN | EP9V6  | Protein arginine N-methyltransferase 1 (Fragment)                   |
| 1558 | dirMS_041712_NAR_120mM_plus.20505.21040.4 | 4 | 17.03 | 1.377E+06       | (RIDHLP)K(R)Y(L)H(L)P(E)P(V)P/A/T/L & R(K)          | 162.23 | 475.2689 | 1890.056  | -0.0058 | -3.1 | 6.75 | 19924.8  | 9.99  | HUMAN | FRU211 | 40S ribosomal protein S10                                           |
| 1559 | dirMS_041712_NAR_50mM_plus.14636.14797.3  | 3 | 17.03 | 1.432E+06       | (RILSEHA)K(R)E(L)S/L/S/D/A/L/Q/L/R(K)               | 145.58 | 535.6136 | 1544.928  | -0.0016 | -1   | 4.56 | 5382.4   | 6.95  | HUMAN | FRW026 | Endoplasmic reticulum                                               |
| 1560 | dirMS_041712_NAR_60mM_plus.15773.16290.3  | 3 | 17.03 | 1.336E+06       | (RIMSME)K(R)M(S)K & D V(D)E(Q)M(L)N/V/V/Q/K(N)      | 141.48 | 641.9696 | 1923.897  | -0.003  | -1.6 | 4.68 | 40069.4  | 4.83  | HUMAN | FE7WR1 | Tubulin beta chain                                                  |
| 1561 | dirMS_041712_NAR_30mM_minus.14863.14863.2 | 2 | 17.02 | 0.259E+04       | (RILSIVQ)K(R)S(I)S/LQ/V/A/M(Q)                      | 134.33 | 491.2611 | 981.519   | -0.0037 | -3.8 | 8.75 | 266161   | 5.68  | HUMAN | EPSPD0 | Epiplakin                                                           |
| 1562 | dirMS_041712_NAR_50mM_minus.10450.10963.3 | 3 | 17.02 | 1.718E+06 M72m  | (RITLNE)R(T)E(m)E(N)F(N)L/R/K(Q)                    | 129.07 | 499.5937 | 1480.772  | 15.995  | 0    | 4.78 | 13588.1  | 4.66  | HUMAN | FRV67  | Keratin, type I cytoskeletal 8 (Fragment)                           |
| 1563 | dirMS_041712_NAR_50mM_minus.19555.19555.3 | 3 | 17.02 | 1.200E+05       | (KJALVN)K(K)A(I)A/V(L)P/G(L)K(R)                    | 142.12 | 580.3176 | 1143.634  | 15.9936 | -1.1 | 9.75 | 42230.8  | 4.77  | HUMAN | AKN628 | Putative tubulin beta chain-like protein ENSP000029037              |
| 1564 | dirMS_041712_NAR_30mM_plus.16991.16991.3  | 3 | 17.02 | 1.318E+05       | (KJIALMD)K(K)I(A)I(V)D/D/G/D & R F A Y(K)           | 105.67 | 558.6442 | 1673.922  | -0.004  | -2.4 | 4.43 | 18430.9  | 4.79  | HUMAN | FRV517 | Coatomer subunit zeta-1                                             |
| 1565 | dirMS_041712_NAR_60mM_minus.9237.9237.3   | 3 | 17.02 | 0.284E+05       | (KJATAG)K(K)I(A)G/T/H)I(G)E D F D N R(L)            | 111.4  | 559.2488 | 1675.731  | 0.0017  | 0.7  | 4.22 | 58502.6  | 6.09  | HUMAN | B4DXY3 | Heat shock 70 kDa protein 1-like                                    |
| 1566 | dirMS_041712_NAR_30mM_plus.13940.14058.2  | 2 | 17.02 | 0.838E+05       | (RJAFFSE)K(R)A(F)I(S)E/V/E/R(K)                     | 126.17 | 492.7436 | 984.479   | 0.0014  | 1.4  | 4.53 | 31751.6  | 6.33  | HUMAN | FRV777 | Proliferation-associated protein 204                                |
| 1567 | dirMS_041712_NAR_30mM_plus.7403.7423.2    | 2 | 17.02 | 1.206E+05       | (KITTTSA)K(R)T(T)A(I)A/V/S/P/G(I)P(S)R(S)           | 93.25  | 488.3507 | 1377.897  | -0.0027 | -2   | 9.41 | 75259.2  | 9.59  | HUMAN | EPK109 | Cytoskeleton-associated protein 4 (Fragment)                        |
| 1568 | dirMS_041712_NAR_40mM_plus.17456.17834.3  | 3 | 17.02 | 1.562E+05       | (RIGLPL)K(R)E(L)I(L)P/G(L)P/A/L & K L P R(K)        | 170.58 | 567.6811 | 1703.031  | -0.0022 | -1.3 | 8.59 | 153084.9 | 5.55  | HUMAN | Q0P2E9 | Enhancer of mRNA-decapping protein 4                                |
| 1569 | dirMS_041712_NAR_40mM_plus.18529.18788.3  | 3 | 17.02 | 0.434E+05       | (KJALVIE)K(K)A(L)E/L)I/V/LQ/P/L/A/E & H Q A R(K)    | 176.12 | 601.0146 | 1801.033  | -0.0038 | -2.1 | 5.4  | 53506.8  | 5.83  | HUMAN | P23381 | Tryptophan-tRNA ligase, cytoplasmic                                 |
| 1570 | dirMS_041712_NAR_30mM_plus.21715.21864.2  | 2 | 17.01 | 0.331E+05       | (RIVNLE)K(R)N(V)I/E/LA/E(K)                         | 169.42 | 457.7881 | 914.571   | -0.002  | -2.2 | 6    | 17833.3  | 8.73  | HUMAN | CJ9A6  | Isoactate dehydrogenase (NADP) cytoplasmic (Fragment)               |
| 1571 | dirMS_041712_NAR_30mM_plus.6354.6354.3    | 3 | 17.01 | 0.924E+06       | (RIVHJGA)K(R)N(E)A & E P I(E)D/S/V(L)R(I)G          | 91.8   | 526.9106 | 1576.714  | 0.003   | 1.9  | 4.48 | 8757.7   | 9.67  | HUMAN | Q9P4Q3 | Plakophilin-3                                                       |
| 1572 | dirMS_041712_NAR_50mM_minus.15713.15799.3 | 3 | 17.01 | 1.128E+05       | (RITVTS)K(R)S(V)E/LA/Q/S/K(R)P/LA/N(K)              | 127.17 | 574.3222 | 1720.927  | -0.002  | -0.8 | 4.56 | 30849.5  | 5.96  | HUMAN | FRV8X  | Cullin-associated NEDD8-dissociated protein 1                       |
| 15   |                                           |   |       |                 |                                                     |        |          |           |         |      |      |          |       |       |        |                                                                     |

|      |                                            |   |       |   |          |                                                  |        |          |          |         |      |      |          |       |       |        |                                                               |
|------|--------------------------------------------|---|-------|---|----------|--------------------------------------------------|--------|----------|----------|---------|------|------|----------|-------|-------|--------|---------------------------------------------------------------|
| 1631 | dirMS_041712_NAR_50mM_minus1.13426.13510.3 | 3 | 16.9  | 1 | 1.91E+05 | (K)ITTELE(K)I(T)TILE/EV/P/S/D I/E/V N V K A K(I) | 144.63 | 661.0226 | 1987.059 | -0.0061 | -3.1 | 4.41 | 17271.6  | 6.75  | HUMAN | BADV12 | Ubiquitin                                                     |
| 1632 | dirMS_041712_NAR_50mM_minus.8527.8570.3    | 3 | 16.9  | 1 | 2.43E+05 | (R)IAGT(GE)R(G)T(G)G/V/D/V L/D(L)A/A/R(K)        | 116.55 | 539.6119 | 1616.824 | -0.0027 | -1.7 | 4.56 | 57391.2  | 6.29  | HUMAN | DA3175 | D-3-phosphoglycerate dehydrogenase                            |
| 1633 | dirMS_041712_NAR_50mM_minus.16779.17051.3  | 3 | 16.9  | 0 | 1.02E+05 | (K)KCC(K)K(L)G(V)G/V/G/V/G/V/G/V/G/V/G/V         | 154.87 | 586.3441 | 1750.831 | -0.0023 | -2   | 5.14 | 58548.2  | 6.29  | HUMAN | DA3175 | D-3-phosphoglycerate dehydrogenase                            |
| 1634 | dirMS_041712_NAR_120mM_plus.20691.21229.4  | 4 | 16.9  | 2 | 1.12E+07 | (R)ITLAEK(R)T(L)A/E/A/V/N/D/L/N M/P/L R G K(Q)   | 160.07 | 280.2814 | 1998.105 | -0.0015 | -0.7 | 5.85 | 23729.5  | 6.29  | HUMAN | C9Z17  | Non-POU domain-containing octamer-binding protein (Fragment)  |
| 1635 | dirMS_041712_NAR_50mM_plus.20771.20807.3   | 3 | 16.9  | 1 | 2.60E+05 | (R)INLQNL(R)N L(Q)N/L/L/T/L/A/K/A/D/R(T)         | 176.88 | 566.0067 | 1696.012 | -0.006  | -3.6 | 7.95 | 144109.9 | 6.01  | HUMAN | J3K87  | Clathrin heavy chain 2                                        |
| 1636 | dirMS_041712_NAR_60mM_plus.1448.14448.9    | 3 | 16.9  | 1 | 6.02E+05 | (K)SLERER(K)S(L)E/R E/W/G(D)N(L)G(L)A/V(L)R(G)   | 131.97 | 557.6331 | 1670.882 | -0.0027 | -1.6 | 4.68 | 49883    | 7.3   | HUMAN | P49411 | Elongation factor Tu, mitochondrial                           |
| 1637 | dirMS_041712_NAR_60mM_minus.6725.7218.3    | 3 | 16.9  | 0 | 1.37E+05 | (R)RLESGM(R)E(S)G/M/G/V/L/V/N/T(K)R              | 97.23  | 497.9023 | 1475.298 | -0.0042 | -0.5 | 6.75 | 56291.9  | 5.37  | HUMAN | FBV66  | Keratin, type II cytoskeletal 8 short form                    |
| 1638 | dirMS_041712_NAR_50mM_plus.10973.10995.3   | 3 | 16.89 | 1 | 3.37E+05 | (K)ILAQDQ(K)E(L)G(V)G/V/D/D/D(M)A/A/C M K(S)     | 125.2  | 634.6126 | 1901.819 | -0.0042 | -2.2 | 4.32 | 5915.6   | 4.73  | HUMAN | ESKE61 | 14-3-3 protein zeta/delta (Fragment)                          |
| 1639 | dirMS_041712_NAR_120mM_minus.10984.11410.3 | 3 | 16.88 | 1 | 8.74E+05 | (R)RFDV(R)R F/D D/V(A)I(V)G/D/S/V/A/R(K)         | 115.2  | 470.8939 | 1410.668 | -0.001  | -0.7 | 4.43 | 20069.4  | 6.74  | HUMAN | EPK54  | Heat shock cognate 71 kDa protein (Fragment)                  |
| 1640 | dirMS_041712_NAR_30mM_minus.16571.16571.3  | 3 | 16.88 | 0 | 7.43E+05 | (R)IASLEA(L)R(S)A/E L A /A/D/A/E/Q/R(K)          | 143.82 | 448.8965 | 1344.675 | -0.0004 | -0.3 | 4.14 | 56607.4  | 5.37  | HUMAN | FBV84  | Keratin, type II cytoskeletal 8                               |
| 1641 | dirMS_041712_NAR_30mM_minus.7386.7386.3    | 3 | 16.88 | 0 | 1.44E+05 | (R)RIGGGS(R)F(G)G/V/G/S/G/V/D/S/A R(M)           | 94.65  | 584.2729 | 1167.539 | -0.0004 | -0.3 | 5.84 | 86346.5  | 5.05  | HUMAN | ETW314 | 26S proteasome non-ATPase regulatory subunit 2                |
| 1642 | dirMS_041712_NAR_50mM_minus.10622.10622.3  | 3 | 16.88 | 0 | 1.78E+05 | (R)ILLIIG(R)R(L)E/L/V/L/G/P/K/P/D/T R(K)         | 128.68 | 540.3174 | 1678.94  | -0.001  | -1.1 | 6.14 | 13988.7  | 6.14  | HUMAN | PS120  | Cotaxerim subunit alpha                                       |
| 1643 | dirMS_041712_NAR_50mM_minus.8432.8432.3    | 3 | 16.88 | 1 | 2.38E+05 | (R)IAGT(GE)R(G)T(G)G/V/D/V D/E A/V T R(G)        | 116.53 | 539.6119 | 1616.824 | -0.0027 | -1.7 | 4.56 | 57391.2  | 6.29  | HUMAN | DA3175 | D-3-phosphoglycerate dehydrogenase                            |
| 1644 | dirMS_041712_NAR_120mM_plus.1710.7233.3    | 3 | 16.88 | 1 | 4.48E+05 | (K)JAQLP(K)A(Q)L/E/P V/A/S/P A/K P K37(R)        | 91.1   | 488.6234 | 1463.858 | -0.0024 | -1.6 | 9.7  | 53377.8  | 5.74  | HUMAN | Q15149 | Plectin                                                       |
| 1645 | dirMS_041712_NAR_50mM_plus.12396.13141.3   | 3 | 16.88 | 1 | 1.61E+06 | (K)IADAV(K)I(L)A/D/V/A/P/S A I E N D/R(KS)       | 136.73 | 575.6533 | 1724.934 | -0.0008 | -5.1 | 4.56 | 18388.8  | 6.85  | HUMAN | FSH113 | Flap endonuclease 1 (Fragment)                                |
| 1646 | dirMS_041712_NAR_30mM_minus.1803.18931.2   | 2 | 16.87 | 0 | 2.45E+05 | (K)ILGGP(K)K(L)G(L)G/P/P/G/R(D)                  | 157.37 | 555.296  | 1009.694 | -0.001  | 0.1  | 5.84 | 60126    | 5.44  | HUMAN | ETP94  | Heat shock 70 kDa protein 1A/1B                               |
| 1647 | dirMS_041712_NAR_50mM_plus.2160.7223.3     | 3 | 16.87 | 0 | 1.04E+06 | (R)IEATP(R)E A I/T/N/P/P/V/Q/E E K/P K1(K)       | 103.55 | 527.282  | 1579.833 | -0.0012 | -0.7 | 4.79 | 55361.8  | 6.42  | HUMAN | SE6AS2 | Protein disulfide isomerase family A, member 3, isoform CRA_b |
| 1648 | dirMS_041712_NAR_60mM_plus.10333.10507.3   | 3 | 16.87 | 0 | 4.39E+06 | (R)GGGG(R)R(S)S(G)P/P/G/G/G/G/Q/V/I/A/V/P/R(N)   | 112.17 | 543.6023 | 1628.782 | -0.0108 | 6.6  | 9.7  | 33268.7  | 9.31  | HUMAN | FBVQ1  | Heterogeneous nuclear ribonucleoprotein A1                    |
| 1649 | dirMS_041712_NAR_120mM_minus.6846.7155.2   | 2 | 16.86 | 1 | 2.88E+06 | (R)ITKTEIS(R)T(K)T(I)E(I)S/E/M N/R(N)            | 92.53  | 604.8012 | 1208.594 | -0.0012 | 1    | 5.81 | 37296.3  | 5.3   | HUMAN | FBV84  | Keratin, type II cytoskeletal 8                               |
| 1650 | dirMS_041712_NAR_30mM_minus.10870.10502.0  | 0 | 16.86 | 0 | 5.46E+05 | (R)IFAGSG(R)F(A)S(G)G/C/D/L V(N)(K)              | 113.6  | 591.2858 | 1181.562 | -0.0024 | -2   | 5.84 | 34524.7  | 5.4   | HUMAN | AM8V27 | Protein SCL1 homolog                                          |
| 1651 | dirMS_041712_NAR_30mM_minus.14169.14499.2  | 2 | 16.86 | 0 | 8.44E+05 | (R)IGLDEY(R)E(L)E/D/R/Y/G/V(L)                   | 131.28 | 508.2442 | 1015.473 | -0.008  | 7.9  | 4.37 | 92752.5  | 4.76  | HUMAN | PI4625 | Endoplasmic reticulum chaperone                               |
| 1652 | dirMS_041712_NAR_40mM_minus.13608.13608.3  | 3 | 16.86 | 1 | 1.19E+05 | (R)ICTDPP(R)C(I)T/D/P Q T G L C L P/L V/K/E K(K) | 164.02 | 662.684  | 1986.04  | -0.0024 | -1.2 | 6.07 | 53377.8  | 5.74  | HUMAN | Q15149 | Plectin                                                       |
| 1653 | dirMS_041712_NAR_60mM_minus.13268.13540.3  | 3 | 16.86 | 1 | 7.33E+06 | (K)KVPQ(K)K(V)P/Q/S(V)P(T) L I/V/E V S R(N)      | 134.78 | 547.317  | 1639.938 | -0.0013 | -0.8 | 8.75 | 57751.3  | 6.9   | HUMAN | FBV90N | Serum albumin                                                 |
| 1654 | dirMS_041712_NAR_30mM_plus.12350.12818.2   | 2 | 16.86 | 0 | 7.35E+05 | (K)NAGVE(K)N(A)G(V)E I/E S L V/W K(I)            | 118.18 | 608.3313 | 1215.658 | -0.0029 | -2.2 | 4.53 | 61224.7  | 5.7   | HUMAN | PI0809 | 60 kDa heat shock protein, mitochondrial                      |
| 1655 | dirMS_041712_NAR_30mM_plus.13955.13955.2   | 2 | 16.86 | 0 | 4.73E+05 | (K)KIDPSP(K)K(S)LP/P G/L/K(R)                    | 121.9  | 595.3008 | 1009.694 | -0.0007 | 6.6  | 8.75 | 8274.8   | 6.83  | HUMAN | PS173  | 60S ribosomal protein L38                                     |
| 1656 | dirMS_041712_NAR_50mM_plus.14641.14662.3   | 3 | 16.86 | 0 | 5.16E+05 | (K)MIDAE(K)M(D)A/E/D/V/N/T A R P/D/E K(A)        | 144.95 | 606.2972 | 1816.875 | -0.0025 | 1.4  | 4.1  | 105308.6 | 5.27  | HUMAN | DA3707 | Alpha-actinin-4                                               |
| 1657 | dirMS_041712_NAR_50mM_minus.17010.17476.3  | 3 | 16.85 | 0 | 2.11E+07 | (R)IHPLP(R)H F/P V/A/T/V(A)P/V/S A E K(A)        | 116.27 | 586.3248 | 1756.963 | -0.0034 | -1.9 | 6.75 | 49012.3  | 4.9   | HUMAN | AMBU15 | Tubulin alpha-4 chain                                         |
| 1658 | dirMS_041712_NAR_60mM_minus.14805.17138.3  | 3 | 16.85 | 1 | 2.04E+06 | (K)IGLQV(K)I(L)D/D/P/R/N/K(S) L N(K)S            | 155.22 | 522.6138 | 1565.832 | -0.0054 | -3.4 | 6.07 | 45508.6  | 5.5   | HUMAN | AKB7Q2 | Heat shock cognate 71 kDa protein                             |
| 1659 | dirMS_041712_NAR_50mM_plus.7651.7651.3     | 3 | 16.85 | 1 | 1.64E+05 | (K)IDVSD(K)I(V)D/S D/L V/L V/K(R)                | 160.78 | 531.927  | 1599.735 | -0.0014 | -1.4 | 5.14 | 16485.05 | 6.14  | HUMAN | PS120  | Cotaxerim subunit alpha                                       |
| 1660 | dirMS_041712_NAR_120mM_minus.11387.11485.3 | 3 | 16.84 | 0 | 5.06E+06 | (R)ISGVHC(R)S I(A)N/A/N/Q/L/S/E L/K(L)           | 116.67 | 442.565  | 1325.681 | -0.0004 | -0.3 | 5.4  | 558007.1 | 5.44  | HUMAN | PSB07  | Epiplakin                                                     |
| 1661 | dirMS_041712_NAR_30mM_plus.12564.12629.2   | 2 | 16.84 | 0 | 2.52E+05 | (K)IDVNA(K)I(D) V I/N/A/N/A/I(KT)                | 159.55 | 493.2863 | 985.568  | -0.0023 | -2.4 | 5.84 | 49012.3  | 4.9   | HUMAN | AMBU15 | Tubulin alpha-4 chain                                         |
| 1662 | dirMS_041712_NAR_20mM_plus.14983.14984.2   | 2 | 16.84 | 0 | 1.45E+05 | (K)IVLQ(L)K(V)I(L)E/L(I)G(Q)T/P V/P/S K(A)       | 174.65 | 573.9244 | 1546.848 | -0.006  | -3.9 | 5.97 | 20480.2  | 9.91  | HUMAN | PC6213 | 60S ribosomal protein L11                                     |
| 1663 | dirMS_041712_NAR_20mM_minus.16026.16026.2  | 2 | 16.84 | 0 | 1.65E+05 | (K)ITVZ(K)I(V)S(L)E/L(I)G(Q)T/P V/P/S K(A)       | 107.72 | 573.9244 | 1546.848 | -0.004  | -2.6 | 5.97 | 20480.2  | 9.91  | HUMAN | PC6213 | 60S ribosomal protein L11                                     |
| 1664 | dirMS_041712_NAR_30mM_plus.15907.15923.2   | 2 | 16.84 | 0 | 5.28E+05 | (K)IMALQP(K)M(A)I/Q/V/M(K)                       | 185.22 | 474.2739 | 947.542  | -0.0011 | -1.2 | 8.5  | 90316.8  | 5.52  | HUMAN | Q13263 | Transcription intermediary factor 1-beta                      |
| 1665 | dirMS_041712_NAR_30mM_plus.6326.6326.2     | 2 | 16.84 | 0 | 1.43E+05 | (R)IFGGSS(R)F(G)G/S/G/S Q/D/S A/R(K)             | 87.52  | 584.2731 | 1167.539 | 0       | 0    | 5.84 | 86346.5  | 5.05  | HUMAN | ETW314 | 26S proteasome non-ATPase regulatory subunit 2                |
| 1666 | dirMS_041712_NAR_30mM_minus.17646.17852.2  | 2 | 16.83 | 0 | 1.51E+06 | (K)IALVPP(K)M(L)I/L/P/R(R)                       | 149.97 | 408.2606 | 815.514  | -0.0001 | -0.2 | 9.79 | 57660.2  | 6.38  | HUMAN | Q9NQH7 | Probable Xaa-Pro aminopeptidase 3                             |
| 1667 | dirMS_041712_NAR_50mM_minus.15523.15761.3  | 3 | 16.83 | 1 | 6.45E+05 | (K)IGLQV(K)I(L)D/D/P/R/N/K(S) L N(K)S            | 157.74 | 522.6138 | 1565.832 | -0.0054 | -3.4 | 6.07 | 45508.6  | 5.5   | HUMAN | AKB7Q2 | Heat shock cognate 71 kDa protein                             |
| 1668 | dirMS_041712_NAR_60mM_minus.8584.87.3      | 3 | 16.83 | 1 | 1.25E+06 | (K)ITGQV(K)I(L)E/L/V/L V/K(R)                    | 106.78 | 517.927  | 1535.771 | -0.0012 | -1.2 | 4.68 | 55807.1  | 5.44  | HUMAN | PSB07  | Epiplakin                                                     |
| 1669 | dirMS_041712_NAR_120mM_plus.10377.10296.3  | 3 | 16.83 | 0 | 1.90E+06 | (R)IGVCLP(R)F I/C/L/P/R/H C S R(G)               | 108.8  | 410.8593 | 1230.551 | -0.0127 | 10.3 | 9.75 | 14391.8  | 4.99  | HUMAN | GSV461 | Creatine kinase B-type (Fragment)                             |
| 1670 | dirMS_041712_NAR_20mM_plus.16773.16773.2   | 2 | 16.83 | 0 | 3.05E+05 | (K)IVGFLP(K)I(Q)A/V/A/N/A/Q E/L/L Q/R(M)         | 186.97 | 776.9419 | 1552.881 | -0.004  | -2.6 | 5.97 | 10728.1  | 9.15  | HUMAN | Q9YS14 | Mitochondrial import inner membrane translocase subunit Tim13 |
| 1671 | dirMS_041712_NAR_50mM_minus.18499.18829.3  | 3 | 16.83 | 1 | 9.58E+06 | (R)IFVGNL(R)F I(V)G/V/A/P/D I/T E D F K R(K)     | 166.67 | 655.3417 | 1964.012 | -0.0018 | -0.9 | 4.32 | 7662.2   | 9.53  | HUMAN | P32346 | Splicing factor, proline- and glutamine-rich                  |
| 1672 | dirMS_041712_NAR_50mM_plus.2022.6022.3     | 3 | 16.83 | 1 | 9.58E+06 | (R)IFVGNL(R)F I(V)G/V/A/P/D I/T E D F K R(K)     | 95.93  | 591.3417 | 1964.012 | -0.0018 | -0.9 | 4.32 | 7662.2   | 9.53  | HUMAN | P32346 | Splicing factor, proline- and glutamine-rich                  |
| 1673 | dirMS_041712_NAR_30mM_plus.18342.18342.2   | 2 | 16.82 | 0 | 4.39E+05 | (R)IQAEY(R)R(Q)A Q/I(Y)E/LA/V/L V/K(R)           | 104.65 | 710.3759 | 1415.748 | -0.0033 | -2.3 | 4.53 | 43737.3  | 5.26  | HUMAN | FBV219 | Keratin, type I cytoskeletal 18                               |
| 1674 | dirMS_041712_NAR_60mM_minus.9207.9207.3    | 3 | 16.82 | 0 | 1.89E+05 | (R)IMTGP(R)M/L/T G/P V S/Q/S/T A T L H(K)(Q)     | 120.21 | 583.963  | 1733.889 | -0.5854 | -5.5 | 8.37 | 138084.9 | 5.02  | HUMAN | Q8BV96 | Cullin-associated NDOB-dissociated protein 1                  |
| 1675 | dirMS_041712_NAR_50mM_plus.13697.13792.3   | 3 | 16.82 | 0 | 4.30E+05 | (K)IVLNS(K)I(V)L/D/VN/V/S/F/S R(T)               | 136.55 | 427.5814 | 1415.728 | -0.0019 | 1.3  | 5.32 | 144109.9 | 6.01  | HUMAN | J3K87  | Clathrin heavy chain 2                                        |
| 1676 | dirMS_041712_NAR_120mM_plus.8646.8646.3    | 3 | 16.82 | 1 | 3.33E+05 | (R)IYLEAE(R)R(L)A/T/L/G/P T A N E I K(A)         | 97.8   | 423.2128 | 1234.618 | -0.0064 | 5.2  | 4.68 | 33378.9  | 5.74  | HUMAN | Q15149 | Plectin                                                       |
| 1677 | dirMS_041712_NAR_20mM_plus.12257.12257.2   | 2 | 16.82 | 0 | 1.17E+05 | (K)IVNGSS(K)N Q I(G)A/G/V/N/T E L/Q/A C K(L)     | 115.97 | 817.4114 | 1633.821 | -0.0059 | -3.6 | 9.07 | 47328.4  | 7.76  | HUMAN | PI3929 | Beta-enolase                                                  |
| 1678 | dirMS_041712_NAR_30mM_plus.11042.11346.2   | 2 | 16.82 | 0 | 2.28E+06 | (R)IVFEFM(R)V(E)I/F/D M/P/D T S/R(S)             | 111.32 | 550.2401 | 1099.473 | -0.0005 | 0.4  | 4.03 | 7898     | 11.1  | HUMAN | PC6257 | 40S ribosomal protein S28                                     |
| 1679 | dirMS_041712_NAR_60mM_plus.9291.9291.3     | 3 | 16.82 | 1 | 1.31E+06 | (R)IFNEVA(R)F(N)E/V/A A/Q/V/S E/D K A R(Q)       | 106.1  | 543.2166 | 1627.771 | -0.0008 | -0.5 | 4.68 | 14236.2  | 10.26 | HUMAN | FSH1P5 | Peptidyl-glycyl-cis-trans isomerase NIMA-interacting 4        |
| 1680 | dirMS_041712_NAR_60mM_minus.11050.11050.3  | 3 | 16.81 | 1 | 2.98E+06 | (K)IVLEAE(K)N(R)K/E A E I/J/A/T R(K)             | 125.33 | 431.5779 | 1292.721 | -0.0017 | -1.3 | 6.11 | 43773.3  | 5.26  | HUMAN | FBV219 | Keratin, type I cytoskeletal 18                               |
| 1681 | dirMS_04                                   |   |       |   |          |                                                  |        |          |          |         |      |      |          |       |       |        |                                                               |











|      |                                            |   |       |                 |                                                   |        |          |           |         |      |      |          |       |       |        |                                                                             |
|------|--------------------------------------------|---|-------|-----------------|---------------------------------------------------|--------|----------|-----------|---------|------|------|----------|-------|-------|--------|-----------------------------------------------------------------------------|
| 2176 | dirMS_041712_NAR_60mM_minus.15625.15806.3  | 3 | 16.01 | 1.680E+05       | (R)FLGDYR(R)F(L)Q/D VYF/D(N L R K R Y)            | 147.7  | 505.924  | 1515.759  | -0.0016 | -1.1 | 5.96 | 55361.8  | 6.42  | HUMAN | G5EAS2 | Protein disulfide isomerase family A, member 3, isoform CRA_b               |
| 2177 | dirMS_041712_NAR_30mM_plus.6193.6194.2     | 2 | 16.01 | 0.167E+05       | (R)GQDEQL(K)Y(Q)E(L)Q/DV/T(L)R                    | 86.78  | 501.7639 | 1002.521  | -0.0009 | -0.9 | 4.53 | 334221.3 | 6.44  | HUMAN | P19524 | Desmoplakin                                                                 |
| 2178 | dirMS_041712_NAR_50mM_plus.18292.18182.3   | 3 | 15.6  | 1.133E+05       | (K)ASASAK(L)A(S)A(V)A(L)E(V)E(F)R(V)              | 163.85 | 461.4772 | 1602.264  | -0.0009 | -0.6 | 8.48 | 146321.6 | 6.44  | HUMAN | P19524 | Desmoplakin                                                                 |
| 2179 | dirMS_041712_NAR_120mM_minus.17700.18190.3 | 3 | 16    | 1.193E+06       | (R)RVPDR(R)R A(P)P(D)I(L)F(E)R(N)K                | 153.2  | 422.0133 | 1264.643  | 0.0001  | 0    | 6.07 | 85037.6  | 6.44  | HUMAN | P19524 | Desmoplakin                                                                 |
| 2180 | dirMS_041712_NAR_20mM_minus.13751.13751.2  | 2 | 16    | 0.399E+05       | (K)LGGSV(K)G(S)G(V)A(S)I(V)S(E)K(P)I(L)           | 188.68 | 670.8912 | 1340.778  | -0.0033 | -2.4 | 6    | 22956    | 8.8   | HUMAN | ENP25  | Cofilin-1                                                                   |
| 2181 | dirMS_041712_NAR_50mM_minus.8266.8324.3    | 3 | 16    | 1.227E+05       | (K)IGLAAD(K)I(L)A/A/D(E)S/T(G)S(A)K(R)I           | 114.85 | 496.9372 | 1488.802  | -0.0046 | -3.1 | 6.07 | 30711.4  | 7.15  | HUMAN | H3BP58 | Fructose-bisphosphate aldolase A (Fragment)                                 |
| 2182 | dirMS_041712_NAR_120mM_plus.11887.11884.4  | 4 | 15.6  | 1.133E+05       | (K)IVYDHL(K)R(V)Q(V)G(P)R(F)H(K)K(L)              | 105.45 | 461.4772 | 1602.264  | -0.0009 | -0.6 | 8.48 | 146321.6 | 6.44  | HUMAN | BT20M8 | Protein transport protein Sec22A8                                           |
| 2183 | dirMS_041712_NAR_20mM_plus.9952.11095.2    | 2 | 16    | 0.143E+06       | (K)KSSSEK(L)E(S)E(S)D(V)P(W)K                     | 143.17 | 587.1392 | 1173.636  | -0.005  | -4.3 | 4.37 | 56607.4  | 5.37  | HUMAN | FBX04  | Keratin, type II cytoskeletal 8                                             |
| 2184 | dirMS_041712_NAR_30mM_plus.12440.12602.2   | 2 | 16    | 0.927E+05       | (R)YSGS(R)R(S)Y(S)G(S)D(V)N/D(L)R(A)              | 119.1  | 619.2776 | 1237.548  | -0.0005 | -0.4 | 5.83 | 69661.6  | 9.75  | HUMAN | O696K6 | RNA-binding protein 14                                                      |
| 2185 | dirMS_041712_NAR_30mM_plus.13174.13307.2   | 2 | 16    | 0.130E+06       | (K)IADVA(K)N(D)I(L)A(N)D(V)R(I)R                  | 121.68 | 500.7769 | 1000.542  | 0.0043  | 4.3  | 4.21 | 76670.1  | 4.6   | HUMAN | P19338 | Nucleolin                                                                   |
| 2186 | dirMS_041712_NAR_40mM_plus.12539.12559.3   | 3 | 16    | 0.398E+05       | (K)ASDAA(K)A(S)A(I)A(M)T(E)P(I)P(T)H(I)R(L)       | 140    | 607.3167 | 1813.937  | -0.0015 | -0.9 | 5.32 | 12926.1  | 4.4   | HUMAN | K7E020 | 14-3-3 protein epsilon (Fragment)                                           |
| 2187 | dirMS_041712_NAR_50mM_plus.1938.13732.3    | 3 | 16    | 0.181E+06       | (K)IADACI(K)A(S)A(V)A(L)E(V)E(F)R(V)              | 140.17 | 587.1392 | 1173.636  | -0.005  | -4.2 | 6.74 | 45579.2  | 6.44  | HUMAN | P19524 | Desmoplakin                                                                 |
| 2188 | dirMS_041712_NAR_50mM_plus.18594.18814.3   | 3 | 16    | 1.979E+05       | (R)IKLSPS(R)K P(L)S(I)P(L)V(P)S(A)Q(R)R           | 168.6  | 530.6702 | 1589.999  | -0.0028 | -1.8 | 10   | 34958.1  | 9.42  | HUMAN | Q15785 | Mitochondrial import receptor subunit TOM34                                 |
| 2189 | dirMS_041712_NAR_60mM_plus.12229.12229.3   | 3 | 16    | 1.21E+06        | (R)INDSGL(R)N(D)S(D)I(L)Q A(T)E(Q)R(R)            | 120.48 | 515.2771 | 1543.819  | -0.0019 | -1.3 | 6.07 | 334221.3 | 6.44  | HUMAN | P19524 | Desmoplakin                                                                 |
| 2190 | dirMS_041712_NAR_120mM_minus.20169.20169.3 | 3 | 15.99 | 0.374E+05       | (K)IVHVLG(K)H V(L)H(Q)D(I)P(T)G(K)R               | 146.4  | 493.5866 | 1298.747  | -0.0015 | -1.1 | 6.71 | 13948.7  | 6.42  | HUMAN | C9I4V5 | Eukaryotic translation initiation factor 5A-2 (Fragment)                    |
| 2191 | dirMS_041712_NAR_120mM_minus.5598.5108.3   | 3 | 15.99 | 1.317E+05       | (R)IRUATTE(R)R(A)E(T)E(L)G(Q)G(Q)K(Q)             | 81.13  | 482.2412 | 1444.714  | 0.0012  | 0.8  | 4.79 | 533778   | 5.14  | HUMAN | C15149 | Plectin                                                                     |
| 2192 | dirMS_041712_NAR_50mM_plus.13381.13509.3   | 3 | 15.99 | 0.246E+05       | (K)IVQYLA(K)N(V)I(Q)A(V)Y(V)S(A)S(K)S             | 144.78 | 493.6043 | 1478.8    | -0.0018 | -1.2 | 8.48 | 227783.5 | 5.5   | HUMAN | P55379 | Myosin-9                                                                    |
| 2193 | dirMS_041712_NAR_20mM_plus.15506.15506.2   | 2 | 15.99 | 0.420E+05       | (R)IVGVDS(R)G(V)G(D)S(D)I(P)UN(L)S(KE)            | 179.18 | 757.3956 | 1513.786  | -0.0007 | -1.1 | 4.03 | 74494.3  | 7.79  | HUMAN | F5H897 | Heat shock protein 75 kDa, mitochondrial                                    |
| 2194 | dirMS_041712_NAR_20mM_plus.7264.7264.2     | 2 | 15.99 | 0.285E+04       | (R)IVLEGG(R)R(V)I(E)G(S)E(V)G(A)R(T)              | 118.03 | 544.7829 | 1088.558  | 0.0003  | 0.3  | 4.25 | 25834.8  | 9.54  | HUMAN | Q96C77 | Colicel-cold domain-containing protein 124                                  |
| 2195 | dirMS_041712_NAR_30mM_plus.10023.10292.2   | 2 | 15.99 | 0.741E+05       | (K)EGVANS(K)E(Q)I(V)A(N)S(A)P(V)E(R)K             | 106.63 | 625.311  | 1249.617  | -0.0024 | -1.9 | 4.53 | 17064    | 8.77  | HUMAN | HY6E4  | Heat shock protein HSP 90-beta (Fragment)                                   |
| 2196 | dirMS_041712_NAR_30mM_plus.7444.7474.2     | 2 | 15.99 | 0.537E+05       | (K)ITQLAE(K)IT(Q)A(V)C(Q)G(Q)R                    | 93.53  | 552.2842 | 1103.563  | -0.0015 | -1.3 | 9.41 | 9740.1   | 10.08 | HUMAN | HY0F62 | Peptidyl-ylipyl cis-trans isomerase PEP4, N-terminally processed (Fragment) |
| 2197 | dirMS_041712_NAR_50mM_plus.19891.20031.3   | 3 | 15.99 | 0.471E+05       | (K)HSQFI(K)H(S)Q(F)G(V)P(I)T(L)Y(L)E(K)           | 173.82 | 603.6541 | 1808.558  | -0.0104 | -5.7 | 6.75 | 83605    | 4.97  | HUMAN | R02838 | Heat shock protein HSP 90-beta                                              |
| 2198 | dirMS_041712_NAR_60mM_plus.11216.11216.3   | 3 | 15.99 | 0.150E+06       | (K)IVYDQ(K)Y(V)I(Q)K(T)P(L)T(L)E(R)T              | 115.95 | 497.2018 | 14389.037 | -0.0005 | -4.3 | 8.59 | 26283.8  | 9.86  | HUMAN | Q43809 | Cleavage and polyadenylation specificity factor subunit 5                   |
| 2199 | dirMS_041712_NAR_20mM_minus.12289.12537.2  | 2 | 15.98 | 0.588E+05 M73m  | (R)IVAVDU(R)R(V)A(V)I(V)E(I)P(E)G(Y)M(D)S(V)S     | 117.52 | 809.4088 | 1601.82   | -0.009  | -3   | 4.03 | 13112.4  | 5.26  | HUMAN | RW8013 | Tubulin beta-8 chain                                                        |
| 2200 | dirMS_041712_NAR_20mM_minus.14714.14884.2  | 2 | 15.98 | 0.301E+06       | (K)EIVLV(L)KE(I)U(D)I(V)A(D)R(I)R                 | 203.67 | 543.3133 | 1085.62   | -0.0006 | -0.7 | 4.03 | 59642    | 4.95  | HUMAN | BT20M8 | Tubulin alpha-1C chain                                                      |
| 2201 | dirMS_041712_NAR_50mM_minus.9044.9044.3    | 3 | 15.98 | 0.704E+04       | (R)IEANALA(R)E A(N)A(A)A G(H)P(A)Q A(V)A I(N)S(I) | 115.77 | 615.6611 | 1844.973  | -0.0038 | -2.1 | 6.85 | 272689.3 | 5.79  | HUMAN | O15020 | Spectrin beta chain, non-erythrocytic 2                                     |
| 2202 | dirMS_041712_NAR_30mM_plus.21319.21319.2   | 2 | 15.98 | 0.271E+05       | (R)IVGVE(R)G(V)I(V)O(E)I(Q)A(S)A(Q)K              | 166.02 | 505.3632 | 1299.727  | -0.0076 | -5.8 | 6    | 22489.6  | 5.38  | HUMAN | EP9139 | Elongation factor 1-delta (Fragment)                                        |
| 2203 | dirMS_041712_NAR_30mM_plus.6022.6022.2     | 2 | 15.98 | 0.212E+06 M30m  | (K)N(M)M(K)N(M)M(A)C(Q)P(H)R                      | 86.02  | 541.2163 | 1065.427  | -0.0079 | -2.8 | 5.84 | 50199.4  | 4.75  | HUMAN | ABN922 | Tubulin beta-4c chain-kinase protein LOC2060334                             |
| 2204 | dirMS_041712_NAR_50mM_plus.12366.12366.3   | 3 | 15.98 | 0.236E+06       | (K)IVYDQ(K)Y(V)I(Q)K(T)P(L)T(L)E(R)T              | 115.95 | 497.2018 | 14389.037 | -0.0005 | -4.3 | 8.59 | 26283.8  | 9.86  | HUMAN | Q43809 | Cleavage and polyadenylation specificity factor subunit 5                   |
| 2205 | dirMS_041712_NAR_50mM_plus.20060.20060.3   | 3 | 15.98 | 1.412E+05       | (R)IVSGVL(R)S(V)G(V)L(Q)G(S)N I(V)F(K)KE          | 176.1  | 539.0011 | 1614.994  | -0.0054 | -3.3 | 10   | 227783.5 | 5.5   | HUMAN | P55379 | Myosin-9                                                                    |
| 2206 | dirMS_041712_NAR_120mM_minus.10135.10298.3 | 3 | 15.97 | 1.625E+05 M142m | (K)IVKVEG(M)K(Y)K E(G)N(I)I(V)A(E)M(E)R(F)        | 110.08 | 507.9186 | 1505.745  | -0.0092 | -0.8 | 4.79 | 18240.4  | 7.96  | HUMAN | GM6337 | Peptidyl-ylipyl cis-trans isomerase A                                       |
| 2207 | dirMS_041712_NAR_30mM_plus.17317.17317.2   | 2 | 15.97 | 0.242E+05       | (R)INGDL(R)R(N)G(G)I(A)I(A)D(L)R                  | 148.4  | 585.3352 | 1169.664  | -0.0006 | -0.5 | 5.84 | 34524.7  | 5.4   | HUMAN | ABM373 | Protein SC13 homolog                                                        |
| 2208 | dirMS_041712_NAR_60mM_minus.15054.15054.2  | 2 | 15.97 | 1.133E+05       | (K)IVYDQ(K)Y(V)I(Q)K(T)P(L)T(L)E(R)T              | 115.95 | 497.2018 | 14389.037 | -0.0005 | -4.3 | 8.59 | 26283.8  | 9.86  | HUMAN | Q43809 | Cleavage and polyadenylation specificity factor subunit 5                   |
| 2209 | dirMS_041712_NAR_20mM_plus.16649.16649.2   | 2 | 15.97 | 0.158E+05       | (R)ILEAQA(R)R(L)E(A)Q)W(A)T(G)G(I)D(P)K           | 185.68 | 769.9362 | 1538.879  | -0.0137 | -8.9 | 4.37 | 334221.3 | 6.44  | HUMAN | P19524 | Desmoplakin                                                                 |
| 2210 | dirMS_041712_NAR_20mM_plus.18757.18757.2   | 2 | 15.97 | 0.240E+05       | (K)IVYDQ(K)Y(V)I(Q)K(T)P(L)T(L)E(R)T              | 200.68 | 731.9068 | 1462.815  | -0.0088 | -6   | 4.21 | 30947.9  | 6.47  | HUMAN | H3BQ34 | Pyruvate kinase                                                             |
| 2211 | dirMS_041712_NAR_50mM_plus.11270.11270.3   | 3 | 15.97 | 0.926E+05       | (R)ITNAK(R)R(F)A I(V)K(P)D(Q) V(Q)R(G)            | 126.32 | 448.9241 | 1344.763  | -0.0057 | -4.2 | 8.41 | 6640.2   | 8.25  | HUMAN | C9K028 | Nucleoside diphosphate kinase A (Fragment)                                  |
| 2212 | dirMS_041712_NAR_60mM_plus.16395.16773.3   | 3 | 15.97 | 0.139E+07       | (R)IEHALLA(R)E(H)A(I)M(T)H(L)G(V)M(Q)             | 144.08 | 438.9179 | 1314.742  | -0.0025 | -1.9 | 6.85 | 50482.3  | 9.31  | HUMAN | PH8004 | Elongation factor 1-alpha 1                                                 |
| 2213 | dirMS_041712_NAR_60mM_minus.15408.15408.3  | 3 | 15.96 | 0.103E+06       | (R)ISQDQ(R)K(S)G(V)D(I)P(V)P(R)P                  | 145.65 | 452.9148 | 1356.727  | -0.0098 | -2.1 | 5.21 | 12394.6  | 4.89  | HUMAN | HY0943 | Programmed cell death protein 6 (Fragment)                                  |
| 2214 | dirMS_041712_NAR_60mM_minus.9526.9526.3    | 3 | 15.96 | 0.333E+05       | (R)IQLSQ(R)K(Q)S(Q)A(G)S(F)S(D)T(H)G(V)R          | 115.55 | 573.2781 | 1717.825  | -0.0055 | -3.2 | 6.74 | 266161   | 5.68  | HUMAN | EP9P0U | Epipkalin                                                                   |
| 2215 | dirMS_041712_NAR_120mM_plus.10867.11521.3  | 3 | 15.96 | 0.147E+06       | (R)IVKVE(R)G(S)A(N)H(Q)S(L)E(L)R(K)               | 111.08 | 442.5657 | 1325.681  | 0.0017  | 1.3  | 5.4  | 580007.1 | 5.44  | HUMAN | PS8107 | Epipkalin                                                                   |
| 2216 | dirMS_041712_NAR_30mM_plus.1716.21716.2    | 2 | 15.96 | 0.341E+05       | (R)F(S)W(N)R(F)S(W)N(S)P(S)S(R)I                  | 169.22 | 633.3085 | 1265.606  | -0.0005 | -2.8 | 9.75 | 83860.6  | 17.3  | HUMAN | F5H165 | Protein transport protein Sec23A                                            |
| 2217 | dirMS_041712_NAR_40mM_plus.13761.13761.3   | 3 | 15.96 | 1.103E+06       | (K)IVYDQ(K)Y(V)I(Q)K(T)P(L)T(L)E(R)T              | 147.37 | 508.918  | 1738.011  | -0.0024 | -1.4 | 6.07 | 334221.3 | 6.44  | HUMAN | P19524 | Desmoplakin                                                                 |
| 2218 | dirMS_041712_NAR_120mM_minus.11896.12054.3 | 3 | 15.95 | 1.255E+06       | (R)IKKASU(L)R(L)K A(S)I(L)E(N)S(I)R               | 115.45 | 415.5668 | 1244.696  | -0.0009 | -0.7 | 8.75 | 43773.3  | 5.26  | HUMAN | FBV219 | Keratin, type I cytoskeletal 18                                             |
| 2219 | dirMS_041712_NAR_120mM_minus.14729.14791.3 | 3 | 15.95 | 1.131E+06       | (R)IGYFTT(R)Y(S)I(F)T(T)A(E)R(E)I(V)R(D)          | 134.73 | 543.9428 | 1629.823  | -0.0093 | -5.7 | 6.14 | 23109.7  | 5.28  | HUMAN | IL3L19 | Actin, cytoplasmic 2, N-terminally processed (Fragment)                     |
| 2220 | dirMS_041712_NAR_120mM_minus.14793.14860.4 | 4 | 15.95 | 2.623E+05       | (R)KIVKVE(R)R(L)V(V)E(S)D(L)E(R)A(I)R             | 138.48 | 450.7512 | 1799.986  | -0.0022 | -1.8 | 4.58 | 31923.6  | 4.85  | HUMAN | BZ7596 | Tropomyosin alpha-1 chain                                                   |
| 2221 | dirMS_041712_NAR_60mM_minus.13761.13761.3  | 3 | 15.95 | 0.378E+05       | (K)IVYDQ(K)Y(V)I(Q)K(T)P(L)T(L)E(R)T              | 136.52 | 514.2461 | 1235.624  | -0.0042 | -3.3 | 6.5  | 45508.6  | 5.52  | HUMAN | ABM373 | Protein SC13 homolog                                                        |
| 2222 | dirMS_041712_NAR_30mM_plus.18885.1894.2    | 2 | 15.95 | 0.193E+06       | (K)IFVYNP(K)Y(F)I(P)N(V)K(V)K                     | 153.13 | 465.2943 | 929.582   | -0.0005 | -0.6 | 8.75 | 15729.3  | 9.3   | HUMAN | FG5C7Y | Lactate dehydrogenase A chain (Fragment)                                    |
| 2223 | dirMS_041712_NAR_60mM_plus.7086.7086.3     | 3 | 15.95 | 1.294E+05       | (R)IARQEN(R)R A(Q)N G(M)P(E)P(I)A(T)A R(G)        | 95.2   | 586.6118 | 1757.824  | -0.0027 | -1.5 | 4.79 | 64356.2  | 9.96  | HUMAN | OG6013 | Serine/threonine-protein kinase PAK 4                                       |
| 2224 | dirMS_041712_NAR_120mM_minus.13668.13984.3 | 3 | 15.94 | 0.204E+06       | (R)IUNIDR(R)N(L)D(I)R P(T)V(T)N L(R)I             | 129.73 | 573.6133 | 1718.882  | -0.0027 | -1.6 | 6.07 | 49012.3  | 4.9   | HUMAN | ABM1U5 | Tubulin alpha-4a chain                                                      |
| 2225 | dirMS_041712_NAR_20mM_minus.11003.11003.2  | 2 | 15.94 | 0.591E+05       | (K)IVAGQD(K)Y(A)G(Q)D(S)S(V)Q(D)K                 | 113.82 | 617.8204 | 1234.643  | -0.0019 | -1.5 | 5.81 | 17327.4  | 10.05 | HUMAN | ABM027 | Small ubiquitin-related modifier 3                                          |
| 2226 | dirMS_041712_NAR_20mM_minus.10392.10392.3  | 3 | 15.94 | 1.38E+04        | (R)IIEAAL(R)E(H)A(I)M(T)H(L)G(V)M(Q)              | 127.28 | 488.9179 | 1471.861  | -0.004  |      |      |          |       |       |        |                                                                             |





|      |                                            |   |       |   |                |                                                     |        |          |            |         |       |        |          |       |       |        |                                                                             |
|------|--------------------------------------------|---|-------|---|----------------|-----------------------------------------------------|--------|----------|------------|---------|-------|--------|----------|-------|-------|--------|-----------------------------------------------------------------------------|
| 2503 | dirMS_041712_NAR_30mM_plus2.16665.17073.2  | 2 | 15.56 | 0 | 8.08E+05       | (KPFSEIDK(K)F/SI/VY/LV/LK/A)                        | 141.68 | 426.2291 | 851.451    | 0       | 0     | 4.37   | 13579.2  | 9.99  | HUMAN | EP906  | Thymocyte nuclear protein 1 (Fragment)                                      |
| 2504 | dirMS_041712_NAR_30mM_plus2.7673.7804.2    | 2 | 15.56 | 0 | 1.67E+06       | (KVTITSEK(K)VI/TLTSE/E/A/R)                         | 94.47  | 567.7813 | 1134.564   | -0.004  | -7.4  | 4.25   | 33940.9  | 9.27  | HUMAN | FSH08  | Lactate dehydrogenase                                                       |
| 2505 | dirMS_041712_NAR_50mM_plus2.19277.18127.3  | 3 | 15.56 | 1 | 3.94E+05       | (KIMKPLV(K)F/KP/LV/VYVILVIG/QP/G A G K E G)         | 169.73 | 523.3915 | 1550.599   | -0.165  | -11.8 | 9.75   | 22450.2  | 5.44  | HUMAN | P90025 | Translational activator GCN1                                                |
| 2506 | dirMS_041712_NAR_60mM_plus.6676.6741.3     | 3 | 15.56 | 1 | 4.94E+05       | (KIKGEEG(K)VI/EDG/D/DMM/R/K)                        | 93.668 | 452.8641 | 1356.574   | -0.004  | 3     | 4.03   | 21341.9  | 9.77  | HUMAN | Q5R370 | Cyclin binding protein                                                      |
| 2507 | dirMS_041712_NAR_60mM_plus.7475.7476.3     | 3 | 15.56 | 1 | 1.87E+06       | (RJVITEE(K)R/V/T/E/E/K/N/F/K/A)                     | 97.9   | 412.8904 | 1236.647   | -0.006  | 7.8   | 4.79   | 18901.8  | 11.65 | HUMAN | F5H152 | Glycogen protein L13                                                        |
| 2508 | dirMS_041712_NAR_60mM_minus.11995.12037.3  | 3 | 15.55 | 1 | 2.62E+05       | (RIGLGGI(K)R/LI/A/Q/G/D/V/W/V/R/K/S)                | 126.95 | 428.9126 | 1284.727   | -0.038  | -2.9  | 6.07   | 97378.8  | 6.4   | HUMAN | P11216 | Cytochrome phosphorylase, brain form                                        |
| 2509 | dirMS_041712_NAR_50mM_plus2.1830.1834.3    | 3 | 15.55 | 0 | 3.58E+05       | (KIMKPLV(K)F/KP/LV/VYVILVIG/QP/G A G K E G)         | 169.73 | 523.3915 | 1550.599   | -0.165  | -11.8 | 9.75   | 22450.2  | 5.44  | HUMAN | P90025 | UMP-CMP lyase                                                               |
| 2510 | dirMS_041712_NAR_50mM_plus2.9884.9884.3    | 3 | 15.55 | 1 | 1.04E+06       | (KIKGEEG(K)K/G E ANTVISY/D/D/P/P S A R/A)           | 119.12 | 554.6155 | 1661.838   | -0.061  | -3.7  | 4.56   | 53724.2  | 9.54  | HUMAN | H3BP67 | RNA-binding protein FUS                                                     |
| 2511 | dirMS_041712_NAR_60mM_plus.11051.11099.3   | 3 | 15.55 | 1 | 9.67E+05       | (RKTLEE(K)R/K/E/E/E/E/E/E/E/E/E/E/E/E)              | 115.75 | 541.5897 | 1622.754   | 0.001   | 0.1   | 4.2    | 108720.9 | 10.17 | HUMAN | Q9Y2V1 | Thyroid hormone receptor-associated protein 3                               |
| 2512 | dirMS_041712_NAR_60mM_plus.15044.15044.3   | 3 | 15.55 | 1 | 2.99E+04       | (RIELAFS(K)R/LV/R/Q/V/S/K E/E/E/R/E)                | 135.27 | 504.9258 | 1512.769   | -0.064  | -4.3  | 4.79   | 30944.2  | 6.52  | HUMAN | BIQ2N1 | ATP-dependent RNA helicase DDX39A                                           |
| 2513 | dirMS_041712_NAR_60mM_plus.7902.7107.3     | 3 | 15.55 | 1 | 2.95E+05       | (RIGDGRG(K)R/SV/R D E Q S V I/D I S/D/A L R/S)      | 95     | 360.9181 | 1080.742   | -0.002  | -1.3  | 4.14   | 50974.6  | 5.31  | HUMAN | BM5R19 | Programmed cell death protein 4                                             |
| 2514 | dirMS_041712_NAR_120mM_minus.12012.12012.3 | 3 | 15.54 | 1 | 2.38E+06       | (KIMKPLV(K)F/KP/LV/VYVILVIG/QP/G A G K E G)         | 119.12 | 554.6155 | 1661.838   | -0.061  | -3.7  | 4.56   | 53724.2  | 9.54  | HUMAN | EP906  | Heat shock cognate 71 kDa protein (Fragment)                                |
| 2515 | dirMS_041712_NAR_30mM_minus.12362.12362.2  | 2 | 15.54 | 0 | 5.77E+05 M73m  | (RIVAUVD(K)R/VL/V/D I/E I/P G I(m) D S V/R/S)       | 172.48 | 809.4088 | 1601.82    | 15.99   | -3    | 4.03   | 13112.4  | 5.23  | HUMAN | FBW813 | Tubulin beta-tach                                                           |
| 2516 | dirMS_041712_NAR_20mM_minus.10120.10187.2  | 2 | 15.54 | 0 | 5.79E+05       | (KJGTVSU(K)G/TI/TG/TI/V/S/E/L/R/K)                  | 109.52 | 481.2669 | 961.531    | -0.048  | -5    | 5.67   | 276046.1 | 6.01  | HUMAN | PA9327 | Fatty acid synthase                                                         |
| 2517 | dirMS_041712_NAR_50mM_minus.17775.17775.3  | 3 | 15.54 | 0 | 1.26E+05       | (RIRCPDQI(K)R/RP D Q/L/T/G/L/T/V/P/L S/E L K/A)     | 70.07  | 643.0129 | 1927.032   | -0.076  | -3.9  | 6.07   | 53377.8  | 5.74  | HUMAN | Q15149 | Plectin                                                                     |
| 2518 | dirMS_041712_NAR_120mM_plus.17857.17857.3  | 3 | 15.54 | 0 | 7.20E+05       | (RHLIADP(K)R/LI/LQ/A/V/P D/Q/G/L/HMS/R/F)           | 146.82 | 648.3113 | 1942.014   | -0.023  | -1.2  | 5.21   | 63013.4  | 7.9   | HUMAN | B3K032 | Protein transport protein Sec23A                                            |
| 2519 | dirMS_041712_NAR_20mM_plus.18934.18934.2   | 2 | 15.54 | 0 | 2.17E+05       | (RJIUAGP(K)R/VL/V/A/P/T N A I F/K/A)                | 102.01 | 679.9039 | 1358.804   | -0.037  | -2.9  | 8.75   | 32621    | 8.75  | HUMAN | B4DLC0 | Poly(C)-binding protein                                                     |
| 2520 | dirMS_041712_NAR_30mM_plus2.18244.18512.2  | 2 | 15.54 | 0 | 2.76E+05       | (RJIUAGP(K)R/VL/V/A/P/T N A I F/K/A)                | 149.6  | 511.2577 | 1021.502   | 0.058   | 5.7   | 4.37   | 46013.4  | 5.38  | HUMAN | P52597 | Heterogeneous nuclear ribonucleoprotein F                                   |
| 2521 | dirMS_041712_NAR_40mM_plus2.13757.13757.3  | 3 | 15.54 | 1 | 3.43E+05       | (RQIVGEG(K)R/V I/G/E/A E T K Q/P G I T F I A A K/F) | 147.45 | 636.0176 | 1906.043   | -0.005  | -2.6  | 8.59   | 32905.8  | 5.88  | HUMAN | C9H19  | Cathepsin D light chain (Fragment)                                          |
| 2522 | dirMS_041712_NAR_30mM_minus.11322.11322.2  | 2 | 15.53 | 0 | 1.40E+05       | (RIUATSA(R)A/A/T/S/P/L F/R/K)                       | 115.4  | 524.2789 | 1407.558   | -0.076  | -7.3  | 9.79   | 535126.6 | 6.01  | HUMAN | Q14204 | Cytosolic dynein 1 heavy chain 1                                            |
| 2523 | dirMS_041712_NAR_50mM_minus.15934.16407.3  | 3 | 15.53 | 1 | 3.24E+07 M148m | (RILDLAG(R)I/D/LI/VAG D R/L/T/D/Y(L)m/K)            | 96.003 | 547.2838 | 1623.841   | 15.9955 | 0.5   | 4.43   | 37482.1  | 5.36  | HUMAN | EP9G30 | Actin, gamma-enteric smooth muscle                                          |
| 2524 | dirMS_041712_NAR_120mM_plus.7648.7817.3    | 3 | 15.53 | 0 | 5.16E+05       | (RISGDMG(R)S/G/SI/M/P/P/S A/H P S V/P/K)            | 140.08 | 462.218  | 1384.627   | 0.021   | 8.7   | 6.46   | 48340.6  | 8.84  | HUMAN | Q07666 | KH domain-containing, RNA-binding, signal transduction-associated protein 1 |
| 2525 | dirMS_041712_NAR_30mM_plus2.8262.8262.2    | 2 | 15.53 | 0 | 2.72E+05       | (KJEAENAE(K)I/A/E/N/A/LV/G/K/H)                     | 96.92  | 497.7255 | 944.505    | -0.002  | -2.1  | 4.53   | 36882.9  | 6.37  | HUMAN | P31342 | Heterogeneous nuclear ribonucleoprotein H3                                  |
| 2526 | dirMS_041712_NAR_50mM_plus2.10365.10677.3  | 3 | 15.53 | 0 | 1.22E+07       | (RIRKDLVS(K)R/D/K/VL/VYVILVIG/S/DV/L/P/N/I)         | 122.83 | 493.4133 | 1478.78    | -0.002  | -0.1  | 4.56   | 56607.4  | 5.37  | HUMAN | FBW84  | Keratin, type II cytoskeletal 8                                             |
| 2527 | dirMS_041712_NAR_60mM_plus.13209.13665.3   | 3 | 15.53 | 1 | 1.02E+06       | (RIRSYNYE(K)R/SI/VYVILVIG/G A G K E G/V/R/A)        | 125.95 | 606.3113 | 1816.923   | -0.035  | -1.9  | 4.43   | 27549.9  | 4.49  | HUMAN | EP9H4  | Tubulin beta chain                                                          |
| 2528 | dirMS_041712_NAR_50mM_minus.18364.18364.3  | 3 | 15.52 | 0 | 4.62E+05       | (KJALUEVL(K)K/L/E/LV/LQ/P/L/A/E/H/Q/D/R/S)          | 175.42 | 601.0139 | 1801.033   | -0.059  | -3.3  | 5.4    | 53066.8  | 5.83  | HUMAN | P23381 | Tryptophan-tRNA ligase, cytoplasmic                                         |
| 2529 | dirMS_041712_NAR_20mM_plus.18985.19149.3   | 3 | 15.52 | 0 | 1.11E+05       | (RIVCLIAI(R)C/T/LA/VYVILVIG/D I Q I R/S)            | 202.28 | 586.641  | 1757.91    | -0.018  | -1    | 3.93   | 12826.8  | 9.82  | HUMAN | ESR89  | 60S ribosomal protein L30 (Fragment)                                        |
| 2530 | dirMS_041712_NAR_30mM_plus2.14988.17489.2  | 2 | 15.52 | 0 | 3.78E+06       | (RIMLVGN(K)M/I/M/V/G/K/N/K)                         | 144.32 | 604.2433 | 807.48     | -0.004  | -0.5  | 8.5    | 11447.2  | 9.81  | HUMAN | C9H1R7 | Cytodrome c (Fragment)                                                      |
| 2531 | dirMS_041712_NAR_60mM_minus.17777.17777.3  | 3 | 15.51 | 0 | 1.04E+06       | (RIVAUVD(K)R/VL/V/D I/E I/P G I(m) D S V/R/S)       | 172.48 | 809.4088 | 1601.82    | -0.002  | -1.8  | 4.28   | 48075.2  | 6.01  | HUMAN | ABK923 | Heat shock cognate 71 kDa protein                                           |
| 2532 | dirMS_041712_NAR_60mM_plus.20562.20664.3   | 3 | 15.52 | 1 | 7.14E+05       | (RILDLAG(R)I/D/LI/VAG D R/L/T/D/Y(L)m/K)            | 168.28 | 551.956  | 1623.841   | -0.008  | -0.5  | 4.43   | 37482.1  | 5.36  | HUMAN | EP9G30 | Actin, gamma-enteric smooth muscle                                          |
| 2533 | dirMS_041712_NAR_60mM_plus.7940.8003.3     | 3 | 15.52 | 1 | 3.68E+05       | (KISDSTNY(K)I/SI/TI/VYVILVIG/S Q S K/TI)            | 99.77  | 473.2367 | 1417.696   | -0.002  | -0.2  | 8.43   | 17045.4  | 4.25  | HUMAN | HW170  | Endoplasmic reticulum                                                       |
| 2534 | dirMS_041712_NAR_20mM_minus.13781.13781.2  | 2 | 15.51 | 0 | 2.36E+05       | (RIVLSSD(K)R/VL/VL/D/S/V/E Y/K/K)                   | 189.15 | 460.3594 | 1279.714   | -0.029  | -2.2  | 4.37   | 56186.7  | 5.47  | HUMAN | B4DUR8 | T-complex protein 1 subunit gamma                                           |
| 2535 | dirMS_041712_NAR_50mM_plus2.18909.18909.2  | 2 | 15.51 | 0 | 2.03E+05       | (RIVLSSD(K)R/VL/VL/D/S/V/E Y/K/K)                   | 201.67 | 656.3644 | 1714.747   | 0.026   | 4.6   | 4.53   | 32325.4  | 6.49  | HUMAN | B4DUR8 | Regulator of microtubule dynamics protein 1                                 |
| 2536 | dirMS_041712_NAR_30mM_plus2.21578.21578.2  | 2 | 15.51 | 0 | 3.32E+05       | (RIFGDLG(K)F/D/G/LI/G/LM/VAF/R/K)                   | 167.47 | 620.3199 | 1239.619   | -0.135  | -10.9 | 5.83   | 32905.8  | 5.88  | HUMAN | C9H19  | Cathepsin D light chain (Fragment)                                          |
| 2537 | dirMS_041712_NAR_40mM_plus2.18463.18463.3  | 3 | 15.51 | 1 | 2.56E+04       | (RIVAEVGG(K)R/A/E/N/G/G/V/P/V L P L V N Q A K/V)    | 174.58 | 646.716  | 1938.142   | -0.088  | -4.5  | 8.8033 | 3.3      | 5.55  | HUMAN | EP9P1  | Ester hydrolase C11orf54 (Fragment)                                         |
| 2538 | dirMS_041712_NAR_60mM_plus.10080.10320.2   | 2 | 15.51 | 0 | 2.03E+06       | (KJGVFESE(K)I/V/E/F/S/G/K/P A/R/K)                  | 111.3  | 616.3425 | 1231.679   | -0.016  | -1.3  | 8.75   | 23729.5  | 9.89  | HUMAN | C9H217 | Non-POU domain-containing octamer-binding protein (Fragment)                |
| 2539 | dirMS_041712_NAR_120mM_minus.10162.10162.3 | 3 | 15.5  | 0 | 1.07E+06       | (KIRFDGEG(K)R/D/E E A/E I/A I/G/V/D/P G/T)          | 110.25 | 551.9528 | 1652.766   | -0.005  | -1.5  | 4.32   | 55361.8  | 6.42  | HUMAN | G5G452 | Protein disulfide isomerase family A, member 3, isoform CRA_b               |
| 2540 | dirMS_041712_NAR_120mM_plus.11184.11184.3  | 3 | 15.5  | 0 | 2.93E+05       | (KISAPTK(K)S/A/K/P/T/K P A A G I/P V/P A E G V/R)   | 115.03 | 634.3662 | 1951.092   | -0.008  | -4    | 8.31   | 54214.9  | 5.66  | HUMAN | C9H113 | Caldesmon (Fragment)                                                        |
| 2541 | dirMS_041712_NAR_30mM_plus2.6878.6902.2    | 2 | 15.5  | 0 | 1.55E+05 M697m | (KJCEGAL(K)K/A/L/E/E/E/V/M/N/K)                     | 91.9   | 612.7538 | 1208.50    | 15.9699 | 1.6   | 4.25   | 96306.4  | 6.41  | HUMAN | P13639 | Elongation factor 2                                                         |
| 2542 | dirMS_041712_NAR_30mM_plus2.14243.14466.2  | 2 | 15.5  | 0 | 5.73E+05       | (KJCEGAL(K)C/SI/G/A/I/VL/T/S/K)                     | 128.2  | 611.3189 | 1221.633   | -0.025  | -2    | 8.75   | 58506.4  | 8.38  | HUMAN | P14618 | Pyruvate kinase isozymes M1/M2                                              |
| 2543 | dirMS_041712_NAR_30mM_plus2.16007.16007.2  | 2 | 15.5  | 0 | 5.88E+05       | (RIVLGGG(K)R/LC/G/G/A/V G A V/R/K)                  | 137.22 | 611.3189 | 1221.641   | -0.013  | -8.5  | 8.75   | 26161.1  | 5.88  | HUMAN | EP9P10 | Epiplakin                                                                   |
| 2544 | dirMS_041712_NAR_40mM_plus2.11023.11023.3  | 3 | 15.5  | 1 | 9.36E+05       | (RIVLSSD(K)R/VL/VL/D/S/V/E Y/K/K)                   | 189.15 | 460.3594 | 1279.714   | -0.029  | -2.2  | 4.37   | 56186.7  | 5.47  | HUMAN | B4DUR8 | Regulator of microtubule dynamics protein 1                                 |
| 2545 | dirMS_041712_NAR_60mM_plus.12372.12372.3   | 3 | 15.5  | 1 | 9.36E+05       | (RISLSDPK(K)R/L/S/F/D A N M V A/R/K)                | 121.18 | 418.2158 | 1252.635   | -0.026  | -2.1  | 5.96   | 35556.4  | 9.3   | HUMAN | F22393 | Transaldolase                                                               |
| 2546 | dirMS_041712_NAR_120mM_minus.17386.17443.3 | 3 | 15.49 | 0 | 8.73E+05       | (RIRTVSGI(R)R/T Q/S/LI/V/D I/S/D M R/N)             | 149.48 | 554.9552 | 1662.848   | 0.031   | 1.9   | 4.56   | 43773.3  | 5.26  | HUMAN | FBV29  | Keratin, type I cytoskeletal 18                                             |
| 2547 | dirMS_041712_NAR_20mM_minus.9818.9877.2    | 2 | 15.49 | 0 | 8.73E+05       | (RIVLQDIN(K)R/VL/Q/D/N/A/R/K)                       | 149.7  | 521.3059 | 1041.605   | -0.006  | -0.6  | 5.84   | 20462.9  | 5.32  | HUMAN | C9H505 | Keratin, type I cytoskeletal 19 (Fragment)                                  |
| 2548 | dirMS_041712_NAR_50mM_plus2.14501.14501.3  | 3 | 15.49 | 1 | 2.03E+05       | (RIVLSSD(K)R/VL/VL/D/S/V/E Y/K/K)                   | 150.6  | 498.612  | 1493.821   | -0.005  | -0.3  | 5.96   | 48313.4  | 6.79  | HUMAN | B4DN25 | UDP-glucose 4-epimerase                                                     |
| 2549 | dirMS_041712_NAR_120mM_plus2.6259.6364.3   | 3 | 15.49 | 0 | 5.04E+05       | (RIVSDEGE(R)A/R S/D/G/LQ/LI/S/PV/T/R/G)             | 86.7   | 463.2395 | 1387.692   | 0.015   | 8.3   | 6.12   | 81007.1  | 6.31  | HUMAN | EP9M14 | Plectin (Fragment)                                                          |
| 2550 | dirMS_041712_NAR_20mM_plus.14735.14735.2   | 2 | 15.49 | 0 | 1.06E+05       | (KJLGGELG(K)L/G E/L/LQ/D N A/L/K)                   | 174.58 | 647.3421 | 1213.679   | -0.018  | -1.4  | 4.37   | 35566.4  | 9.3   | HUMAN | F22393 | Transaldolase                                                               |
| 2551 | dirMS_041712_NAR_30mM_plus2.18951.18953.2  | 2 | 15.49 | 0 | 3.38E+05       | (RILTAEDU(K)R/LT/A/E/DV/E/E/K)                      | 153.07 | 582.796  | 1164.59    | -0.048  | -4.1  | 4.14   | 53778.8  | 5.74  | HUMAN | Q15149 | Plectin                                                                     |
| 2552 | dirMS_041712_NAR_40mM_plus2.10704.10704.3  | 3 | 15.49 | 0 | 1.85E+05       | (KJGVSLD(K)R/VL/S/LD/VN/G/H/L/P/G G A V K/I)        | 128.15 | 530.9567 | 1590.86    | -0.043  | -2.7  | 6.17   | 26233.5  | 10.95 | HUMAN | B4DQ31 | Microtubule-associated protein                                              |
| 2553 | dirMS_041712_NAR_50mM_plus2.15478.15478.3  | 3 | 15.49 | 0 | 8.15E+05       | (KJGVSLSE(K)A/EI/S/LD/VN/G/H/L/P/G G A V K/I)       | 149.52 | 615.6248 | 1844.893</ |         |       |        |          |       |       |        |                                                                             |



|      |                                            |   |       |                |                                                                   |        |          |          |         |      |       |          |       |       |           |                                                                            |
|------|--------------------------------------------|---|-------|----------------|-------------------------------------------------------------------|--------|----------|----------|---------|------|-------|----------|-------|-------|-----------|----------------------------------------------------------------------------|
| 2721 | dirMS_041712_NAR_30mM_plus2.8833.8833.2    | 2 | 15.28 | 0.399E+05      | (K)ITSEIPE(K)I)T)S)E)P)O)T)E)R(M)                                 | 100.2  | 587.3094 | 1173.611 | 0.0005  | 0.5  | 4.53  | 24161.9  | 5.27  | HUMAN | F8VZ09    | SAP domain-containing ribonuclease                                         |
| 2722 | dirMS_041712_NAR_50mM_plus2.2484.22484.3   | 3 | 15.28 | 1.236E+06      | (R)IGVMA(R)IG)V)M)A)VD)A)V)A)E)K)K(Q)                             | 195.7  | 519.6393 | 1555.908 | -0.0047 | -3   | 6.07  | 25257.7  | 9.52  | HUMAN | E7E5H4    | 60 kDa heat shock protein, mitochondrial (Fragment)                        |
| 2723 | dirMS_041712_NAR_50mM_plus2.1453.1473.2    | 3 | 15.28 | 0.472E+05      | (K)ITSEIPE(K)I)E)P)P)O)T)E)R(M)                                   | 99.42  | 536.7853 | 1072.267 | -0.0028 | -1   | 4.37  | 16386.2  | 6.45  | HUMAN | P98919    | 40S ribosomal protein S15                                                  |
| 2724 | dirMS_041712_NAR_30mM_plus2.10689.10840.2  | 2 | 15.27 | 0.538E+05      | (R)IGSFTT(R)IG)S)I)T)T)A)E)R(E)                                   | 112.3  | 566.7699 | 1132.527 | 0.0056  | 4.9  | 6     | 23901.9  | 5.28  | HUMAN | L14       | Actin, cytoplasmic 2, non-typically processed (Fragment)                   |
| 2725 | dirMS_041712_NAR_30mM_plus2.12569.13070.2  | 2 | 15.27 | 1.316E+06      | (K)K)ITAD(K)K)V)A)I)D)C)G)Q)I)E)E(L)                              | 123.22 | 624.3176 | 1247.63  | -0.0021 | -1.7 | 4.75  | 18240.4  | 7.96  | HUMAN | PE2937    | Peptidyl-prolyl cis-trans isomerase A                                      |
| 2726 | dirMS_041712_NAR_30mM_plus2.14875.14875.2  | 2 | 15.27 | 0.140E+05      | (R)I)WALSC(R)I)W)A)I)S)Q)S)N)P)S)A)L)R(E)                         | 134.55 | 665.3481 | 1329.691 | -0.0021 | -1.5 | 9.75  | 90004.9  | 5.14  | HUMAN | PS5072    | Transitional endoplasmic reticulum ATPase                                  |
| 2727 | dirMS_041712_NAR_30mM_plus2.1453.1473.2    | 3 | 15.27 | 0.472E+05      | (K)ITSEIPE(K)I)E)P)P)O)T)E)R(M)                                   | 129.9  | 536.7853 | 1072.267 | -0.0028 | -1   | 4.37  | 16386.2  | 6.45  | HUMAN | P98919    | 40S ribosomal protein S15                                                  |
| 2728 | dirMS_041712_NAR_30mM_plus2.19089.19089.2  | 2 | 15.27 | 0.929E+05      | (K)ID)KAT(K)D)S)A)I)G)A)G)I)A)R)I)Q(L)                            | 102.65 | 600.3411 | 1159.674 | 0.0007  | 0.6  | 5.84  | 17973    | 5.16  | HUMAN | EP905     | Heat shock cognate 71 kDa protein (Fragment)                               |
| 2729 | dirMS_041712_NAR_30mM_plus2.8792.8931.2    | 2 | 15.27 | 0.750E+05      | (R)IGMGP(R)IG)M)G)I)G)T)P)A)G)V)I)R(Q)                            | 152.63 | 566.7657 | 1120.52  | 0.0037  | 3.3  | 8.75  | 76262.2  | 9.53  | HUMAN | P23246    | Splicing factor, proline- and glutamine-rich                               |
| 2730 | dirMS_041712_NAR_60mM_plus.16743.16763.1   | 3 | 15.27 | 1.872E+05      | (R)I)STNPK(R)I)S)T)M)K)G)T)A)Y)T)F)T)P)N)I)Q(L)                   | 144.73 | 616.3117 | 1846.933 | -0.0128 | -7   | 9.7   | 73202    | 9.19  | HUMAN | CJMU5     | Probable ATP-dependent RNA helicase XD17                                   |
| 2731 | dirMS_041712_NAR_120mM_minus.17760.17760.3 | 3 | 15.26 | 1.332E+05      | (R)I)R)F)D)P)I)R)K)R)A)V)P)I)I)I)N)K(Q)                           | 119.82 | 612.8849 | 1236.637 | 0.003   | 2.4  | 6.07  | 83605    | 4.97  | HUMAN | R0I238    | Heat shock protein HSP 90-beta                                             |
| 2732 | dirMS_041712_NAR_40mM_plus2.1413.1420.1    | 3 | 15.26 | 0.688E+05      | (R)I)H)P)I)A)T)R)I)E)A)I)T)I)A)E)R(K)A                            | 107.82 | 586.3282 | 1276.961 | -0.004  | -2.1 | 6.75  | 49012.3  | 4.8   | HUMAN | P98919    | Tubulin alpha-4A chain                                                     |
| 2733 | dirMS_041712_NAR_40mM_plus2.14162.14277.3  | 3 | 15.26 | 1.295E+05      | (K)I)VA)T)N(K)I)V)I)A)I)A)T)N)R)V)I)D)U)P)A)L)I)R(S)              | 167.82 | 617.3653 | 1850.086 | -0.0045 | -2.4 | 5.93  | 32827.5  | 5.92  | HUMAN | EPK205    | 26S protease regulatory subunit 6A (Fragment)                              |
| 2734 | dirMS_041712_NAR_50mM_plus2.17073.17073.3  | 3 | 15.26 | 0.155E+05      | (R)I)E)I)E)I)S)R)I)E)I)E)I)S)G)E)I)L)P)K)P)T)K(Q)                 | 165.35 | 546.3329 | 1636.988 | -0.0042 | -2.6 | 6.14  | 13861.5  | 6.13  | HUMAN | EP9122    | Spectrin beta chain, non-erythrocytic 2 (Fragment)                         |
| 2735 | dirMS_041712_NAR_50mM_plus2.15320.15320.3  | 3 | 15.26 | 1.371E+05      | (R)I)I)D)A)Q)I)R)I)D)A)G)I)A)T)G)I)G)I)C)P)A)R)R)I)Q(L)           | 145.7  | 604.3394 | 1810.996 | -0.007  | -3.8 | 9.6   | 266161   | 5.88  | HUMAN | EP910U    | Epiplakin                                                                  |
| 2736 | dirMS_041712_NAR_120mM_plus.1096.11258.3   | 3 | 15.26 | 0.115E+06      | (K)N)Y)E)K)I)R)F)Y)I)E)H)P)E)A)R)I)Q(L)                           | 111.23 | 454.2368 | 1066.664 | 0.0041  | 3    | 5.4   | 23002    | 5.19  | HUMAN | CJMU5     | Probable ATP-dependent RNA helicase XD17                                   |
| 2737 | dirMS_041712_NAR_20mM_plus.12409.12409.3   | 3 | 15.26 | 0.315E+04      | (K)I)S)M)A)S)C)I)T)N)I)E)R)S)I)33.92                              | 157.65 | 611.9768 | 1833.92  | -0.0039 | -2.1 | 8.75  | 31718.5  | 7.17  | HUMAN | E7L7U4    | Glyceroldehyde-3-phosphate dehydrogenase                                   |
| 2738 | dirMS_041712_NAR_30mM_plus2.12103.12104.2  | 2 | 15.26 | 0.392E+05      | (R)I)G)Y)S)E)R)I)G)Y)I)S)E)M)N)R)I)Q(L)                           | 116.33 | 566.7397 | 1132.473 | -0.0007 | -0.6 | 4.53  | 53778    | 5.74  | HUMAN | Q15149    | Plectin                                                                    |
| 2739 | dirMS_041712_NAR_50mM_plus2.12326.12299.3  | 3 | 15.26 | 1.169E+06      | (K)I)U)A)N)T(K)I)I)I)A)N)M)T)G)D)I)D)K)I)Q(K)                     | 132.52 | 511.6172 | 1532.835 | 0.0018  | 1.2  | 5.96  | 57024.9  | 6.01  | HUMAN | FG5W)F6   | T-complex protein 1 subunit beta                                           |
| 2740 | dirMS_041712_NAR_60mM_plus.8565.8565.3     | 3 | 15.26 | 1.132E+06      | (R)I)G)M)A)S)E)K)I)M)G)I)S)E)I)E)K)S)I)P)U)R(Q)                   | 103.15 | 448.2449 | 1345.714 | 0.0057  | 4.3  | 8.35  | 32745.6  | 4.64  | HUMAN | R0G748    | Nucleophosmin                                                              |
| 2741 | dirMS_041712_NAR_60mM_plus.10051.10479.3   | 3 | 15.25 | 0.590E+06      | (R)I)G)S)A)H)C)I)R)S)A)N)W)Q)I)S)E)I)U)R)I)C(E)                   | 117.4  | 442.5648 | 1325.681 | -0.001  | -0.7 | 4.54  | 558007.1 | 5.44  | HUMAN | PS8107    | Epiplakin                                                                  |
| 2742 | dirMS_041712_NAR_60mM_plus.11315.11315.3   | 3 | 15.25 | 1.143E+05      | (R)I)D)G)K)I)S)R)I)D)G)K)I)S)E)S)D)S)D)I)P)K)E)I)                 | 123.12 | 491.927  | 1473.78  | -0.0131 | -8.9 | 4.56  | 56607.4  | 5.74  | HUMAN | F8V)B4    | Keratin, type II cytoskeletal 8                                            |
| 2743 | dirMS_041712_NAR_120mM_plus.19474.19474.3  | 3 | 15.25 | 1.690E+05      | (K)I)Y)N)Q)I)I)K)I)M)Q)I)U)I)R)A)E)E)E)G)S)K)I)A)                 | 155.23 | 564.6333 | 1691.896 | -0.0049 | -2.9 | 4.79  | 47510.4  | 7.04  | HUMAN | PO6733    | Alpha-enolase                                                              |
| 2744 | dirMS_041712_NAR_120mM_plus.1767.18204.2   | 2 | 15.25 | 0.238E+06      | (K)I)U)I)P)P)K)I)I)I)I)I)P)P)P)R)I)Q(L)                           | 147.43 | 408.2604 | 815.514  | -0.0003 | -0.5 | 11.87 | 57660.2  | 6.78  | HUMAN | D)N)Q)H7  | Probable Xaa-Pro aminopeptidase 3                                          |
| 2745 | dirMS_041712_NAR_40mM_plus2.1175.11816.3   | 3 | 15.25 | 2.806E+05      | (R)I)A)A)P)D)E)K)I)R)I)A)P)E)K)E)I)A)I)D)E)S)T)A)G)S)I)A)R)I)Q(L) | 133.4  | 483.3558 | 1898.059 | 0.0005  | -1.8 | 6.07  | 30711.4  | 5.44  | HUMAN | PS8107    | Fructose-bisphosphate aldolase A (Fragment)                                |
| 2746 | dirMS_041712_NAR_60mM_plus.850.8625.3      | 3 | 15.24 | 0.274E+05      | (R)I)A)A)G)H)I)R)I)A)I)Q)G)H)T)I)D)I)E)A)R)I)Q(L)                 | 107.93 | 470.9153 | 1410.734 | -0.0022 | -1.6 | 5.32  | 533778   | 5.74  | HUMAN | Q15149    | Plectin                                                                    |
| 2747 | dirMS_041712_NAR_120mM_plus.18407.18464.3  | 3 | 15.24 | 1.609E+04 M75m | (R)I)R)I)E)D)I)R)R)F)O)E)I)A)I)S)D)I)G)M)A)N)R)I)Q(L)             | 149.78 | 613.3075 | 1821.916 | 15.9916 | -1.8 | 4.32  | 18466.1  | 6.14  | HUMAN | H)B)S)U3  | Pyruvate kinase (Fragment)                                                 |
| 2748 | dirMS_041712_NAR_20mM_plus.12670.12670.2   | 2 | 15.24 | 0.121E+05      | (K)I)G)T)Q)I)T)K)I)Q)I)Y)I)Q)I)G)I)S)I)K)I)Q(L)                   | 160.13 | 673.3872 | 1345.769 | -0.0014 | -1.1 | 8.75  | 57391.2  | 6.29  | HUMAN | Q)A)3)T5  | D-3-phosphoglycerate dehydrogenase                                         |
| 2749 | dirMS_041712_NAR_30mM_plus2.6009.6009.2    | 2 | 15.24 | 0.937E+05      | (R)I)R)T)Q)I)S)R)I)R)T)Q)I)S)I)I)I)Q)I)S)M)R)I)Q(L)               | 85.77  | 501.74   | 1001.58  | 0.0005  | 0.2  | 6.14  | 2151.69  | 6.35  | HUMAN | EP9122    | Spectrin beta chain, non-erythrocytic 2                                    |
| 2750 | dirMS_041712_NAR_50mM_plus2.16362.16499.3  | 3 | 15.24 | 0.145E+06      | (K)I)E)I)E)K)I)M)I)E)I)P)K)I)E)I)S)D)I)T)S)K)I)Q(L)               | 154.62 | 561.9883 | 1683.953 | -0.0024 | -1.4 | 4.56  | 28071.3  | 8.48  | HUMAN | P)B)17    | Electron transfer flavoprotein subunit beta                                |
| 2751 | dirMS_041712_NAR_50mM_plus2.5726.5726.3    | 3 | 15.24 | 1.05E+06       | (K)I)T)A)G)P)I)K)T)A)G)P)I)S)A)S)K)A)G)P)A)G)K)I)Q(L)             | 91.9   | 475.5987 | 1424.786 | -0.0041 | -2.8 | 10    | 72529.2  | 9.59  | HUMAN | B)S)M)E)G | Microtubule-associated protein 4 (Fragment)                                |
| 2752 | dirMS_041712_NAR_50mM_plus2.9501.9501.3    | 3 | 15.24 | 1.339E+05      | (R)I)A)G)T)G)E)R)A)G)T)G)I)D)N)D)I)E)A)A)T)R)K)I)Q(L)             | 117.4  | 539.6108 | 1616.824 | -0.006  | -3.7 | 4.56  | 57391.2  | 6.29  | HUMAN | Q)A)1)T5  | D-3-phosphoglycerate dehydrogenase                                         |
| 2753 | dirMS_041712_NAR_50mM_plus2.11742.11742.2  | 2 | 15.24 | 1.306E+05      | (R)I)G)H)S)T)R)I)A)G)H)S)T)R)I)E)I)N)K)I)Q(L)                     | 181.89 | 483.2829 | 1761.782 | -0.0047 | -2.1 | 5.1   | 26419.8  | 6.07  | HUMAN | H)P)R)H)7 | Splicing factor, proline- and glutamine-rich (Fragment)                    |
| 2754 | dirMS_041712_NAR_60mM_plus.12409.12534.3   | 3 | 15.24 | 1.385E+06      | (K)I)N)F)M)S)E)K)I)M)N)F)M)S)E)I)U)R)I)C(E)                       | 121.6  | 445.9046 | 1335.69  | 0.0089  | 6.7  | 4.56  | 25082    | 11.29 | HUMAN | A)Z)A)R5  | 40S ribosomal protein S6                                                   |
| 2755 | dirMS_041712_NAR_60mM_plus.12935.12982.3   | 3 | 15.24 | 1.26E+06       | (K)I)N)G)R)P)K)I)N)G)R)P)K)I)E)M)P)I)P)T)I)Q(L)                   | 124.65 | 470.9225 | 1410.752 | 0.0008  | 0.5  | 6.11  | 16559.1  | 10.36 | HUMAN | PE)Z)249  | 40S ribosomal protein S16                                                  |
| 2756 | dirMS_041712_NAR_60mM_plus.17087.17087.3   | 3 | 15.24 | 1.726E+06      | (K)I)N)K)I)P)E)W)K)I)N)K)I)P)E)W)I)D)I)Y)I)K)I)Q(L)               | 145.72 | 438.5272 | 1313.746 | 0.0007  | 0.5  | 6.07  | 16060.2  | 10.31 | HUMAN | P)R)3)019 | 40S ribosomal protein S19                                                  |
| 2757 | dirMS_041712_NAR_60mM_plus.9917.9918.3     | 3 | 15.24 | 1.033E+06      | (R)I)S)N)E)S)I)R)I)S)I)N)E)S)I)R)I)S)I)N)E)S)I)R)I)Q(L)           | 109.93 | 439.9089 | 1317.701 | 0.0053  | 4    | 4.78  | 34421.3  | 6.44  | HUMAN | P)I)S)Z)4 | Desmoplakin                                                                |
| 2758 | dirMS_041712_NAR_120mM_plus.14365.14365.3  | 3 | 15.23 | 1.43E+05 M313m | (R)I)R)T)Q)I)S)R)I)R)T)Q)I)S)I)I)I)Q)I)S)M)R)I)Q(L)               | 133.25 | 560.2849 | 1662.848 | -0.0052 | -1.6 | 4.56  | 43773.3  | 5.26  | HUMAN | EP9122    | Spectrin beta chain, non-erythrocytic 2                                    |
| 2759 | dirMS_041712_NAR_120mM_plus.5611.5769.3    | 3 | 15.23 | 0.121E+06      | (R)I)A)E)A)E)R)I)A)E)A)E)I)A)G)S)P)R)P)D)R)I)Q(L)                 | 84.47  | 451.5563 | 1352.655 | -0.001  | -0.7 | 4.68  | 558007.1 | 5.44  | HUMAN | PS)S)107  | Epiplakin                                                                  |
| 2760 | dirMS_041712_NAR_30mM_plus2.15286.15286.2  | 2 | 15.23 | 0.479E+04      | (K)I)S)C)D)F)K)I)C)I)D)F)G)I)A)R)I)Q(L)                           | 135.8  | 493.2343 | 985.456  | 0.0053  | 5.4  | 5.84  | 143554.7 | 5.57  | HUMAN | A)B)M)U)9 | Serine/threonine-protein kinase 36                                         |
| 2761 | dirMS_041712_NAR_30mM_plus2.9020.9020.2    | 2 | 15.23 | 0.579E+05      | (R)I)A)T)N)T)S)R)I)A)T)N)T)S)R)I)A)T)N)T)S)R)I)Q(L)               | 100.57 | 565.801  | 1130.605 | -0.0105 | -2.9 | 5.84  | 26333.5  | 10.95 | HUMAN | B)A)D)Q)1 | Microtubule-associated protein                                             |
| 2762 | dirMS_041712_NAR_40mM_plus.1902.19110.3    | 3 | 15.23 | 1.316E+05      | (R)I)G)I)P)P)K)I)I)G)I)P)P)K)I)I)G)I)P)P)S)R)I)Q(L)               | 186.57 | 581.9622 | 1916.827 | -0.0007 | -1.8 | 3.78  | 951.9    | 6.74  | HUMAN | E)T)U)S)P | Cas9 nuclease                                                              |
| 2763 | dirMS_041712_NAR_60mM_plus.13790.14340.3   | 3 | 15.23 | 1.288E+07      | (K)I)A)S)E)S)K)I)A)S)I)E)N)S)A)R)E)I)E)A)R)I)Q(L)                 | 129.92 | 491.3228 | 1473.766 | 0.0039  | 2.6  | 4.79  | 47373.3  | 5.26  | HUMAN | F)E)R)29  | Keratin, type I cytoskeletal 18                                            |
| 2764 | dirMS_041712_NAR_60mM_plus.17760.17760.3   | 3 | 15.23 | 0.372E+05      | (R)I)S)E)S)H)S)R)I)E)I)E)S)H)S)F)A)I)A)T)K)I)E)                   | 149.9  | 487.5963 | 1460.774 | 0.0     | 0    | 6.47  | 81007.1  | 6.31  | HUMAN | E)P)N)1   | Plectin (Fragment)                                                         |
| 2765 | dirMS_041712_NAR_60mM_plus.17101.17101.3   | 3 | 15.23 | 0.820E+04      | (K)I)I)D)S)T)Y)K)I)I)D)S)T)Y)T)H)F)I)A)T)K)I)Q(L)                 | 155.38 | 454.2519 | 1360.747 | -0.0059 | -4.4 | 6.74  | 25746.2  | 6.77  | HUMAN | B)A)D)X)9 | Proteasome (Prosome, macropain) subunit, alpha type, $\beta$ isoform CRA_A |
| 2766 | dirMS_041712_NAR_30mM_plus.9709.9726.3     | 3 | 15.22 | 1.130E+05      | (R)I)G)I)P)P)K)I)I)G)I)P)P)K)I)I)G)I)P)P)S)R)I)Q(L)               | 104.37 | 407.8899 | 1221.659 | -0.0009 | -2.8 | 6.14  | 43733.3  | 5.26  | HUMAN | F)E)R)29  | Keratin, type I cytoskeletal 18                                            |
| 2767 | dirMS_041712_NAR_20mM_plus.15672.15672.3   | 3 | 15.22 | 0.737E+05      | (K)I)G)Y)N)G)K)I)G)Y)N)Q)I)P)T)W)P)P)G)D)G)I)A)K)I)Q(L)           | 172.92 | 608.9991 | 1824.985 | -0.0027 | -1.5 | 5.8   | 49012.3  | 4.9   | HUMAN | A)B)M)U)1 | Tubulin alpha-4A chain                                                     |
| 2768 | dirMS_041712_NAR_20mM_plus.16433.16706.2   |   |       |                |                                                                   |        |          |          |         |      |       |          |       |       |           |                                                                            |

|      |                                            |   |       |                 |                                                     |        |          |          |         |       |      |          |             |                                               |                                                                           |
|------|--------------------------------------------|---|-------|-----------------|-----------------------------------------------------|--------|----------|----------|---------|-------|------|----------|-------------|-----------------------------------------------|---------------------------------------------------------------------------|
| 2830 | dirMS_041712_NAR_50mM_minus2.7744.7765.3   | 3 | 15.15 | 0.244E+05       | (R)ILESGM(R)EIS G M Q/N/Q/S/U/H/T/K/T)              | 11127  | 492.5712 | 1475.698 | -0.0009 | 0.6   | 6.75 | 56607.4  | 5.37 HUMAN  | F8V4B4                                        | Keratin, type II cytoskeletal 8                                           |
| 2831 | dirMS_041712_NAR_60mM_minus.5713.5713.2    | 2 | 15.15 | 1.442E+06       | (K)DSYVG(K)D S/V/Y/G/D/E A Q/S/R/R/G)               | 87.58  | 67.8144  | 1354.623 | -0.0018 | -1.3  | 4.56 | 32616.5  | 5.18 HUMAN  | AKN176                                        | Actin, alpha skeletal muscle                                              |
| 2832 | dirMS_041712_NAR_120mM_plus.11465.11465.4  | 1 | 15.15 | 2.63E+05        | (I)KLSLQGLR(R)I Q/Q/A/V/L/E/V/V/A/T/L/R)            | 114.02 | 102.567  | 1979.941 | -0.0011 | 1.5   | 5.5  | 39016.5  | 5.18 HUMAN  | Q9H941                                        | Nuclear ribonucleo-protein A1 (Fragment)                                  |
| 2833 | dirMS_041712_NAR_30mM_plus2.17148.17290.2  | 2 | 15.15 | 0.336E+05       | (K)ITGVGGV(K)T V/I/G/V/P/D/L Q/S/R/R/G)             | 143.33 | 617.3263 | 1233.647 | -0.0021 | -1.7  | 4.37 | 53219.8  | 5.66 HUMAN  | OSK6P4                                        | Cytosolic non-specific dipeptidase                                        |
| 2834 | dirMS_041712_NAR_30mM_plus2.6622.6717.2    | 2 | 15.15 | 0.10E+06        | (K)SLDDEG(K)S(L)D/E M/E/K/Q)                        | 90     | 426.1971 | 851.381  | -0.0054 | 6.4   | 4.14 | 26419.2  | 5.1 HUMAN   | HDY9K7                                        | Splicing factor, proline- and glutamine-rich (Fragment)                   |
| 2835 | dirMS_041712_NAR_50mM_plus2.14006.14006.3  | 3 | 15.15 | 1.607E+05       | (K)IGGVEV(K)G G/E/L/V/Y/T/D/S E A R D V/P/E K/A)    | 141.53 | 638.9735 | 1914.908 | -0.002  | -1.1  | 4.18 | 53377.8  | 5.74 HUMAN  | Q15149                                        | Plectin                                                                   |
| 2836 | dirMS_041712_NAR_50mM_plus2.18975.20249.3  | 3 | 15.15 | 2.39E+05        | (R)DIDHSH(R)R/V L/H/L/P/E S/V/V/V/A/T/L/R)          | 173.92 | 238.5658 | 1733.599 | -0.001  | 0.6   | 5.32 | 16252.9  | 9.99 HUMAN  | FDI211                                        | 40S ribosomal protein S10                                                 |
| 2837 | dirMS_041712_NAR_60mM_plus.17492.17492.3   | 3 | 15.15 | 1.374E+05       | (R)IKVPGV(R)K P/G/V/A/V/E/L/E/D/D/T/G T F R/I)      | 148.18 | 650.0017 | 1948.002 | -0.0117 | -0.6  | 4.32 | 68688.3  | 5.77 HUMAN  | BD40X6                                        | Fragile X mental retardation syndrome-related protein 1                   |
| 2838 | dirMS_041712_NAR_120mM_minus.4243.4243.3   | 3 | 15.14 | 1.683E+05       | (R)IEFGPAG(R)E P/G/P/G A R G D/G S/D/S R/G)         | 174.47 | 443.2401 | 1327.599 | -0.0008 | -0.6  | 4.56 | 558007.1 | 5.44 HUMAN  | PS8107                                        | Epiplakin                                                                 |
| 2839 | dirMS_041712_NAR_50mM_minus.14124.14124.3  | 3 | 15.14 | 0.932E+05       | (K)SPAPPLL(K)S/P/A/P/P L H V/A L A Q/Q/Q/Q)         | 148.45 | 500.2911 | 1498.874 | -0.0153 | -10.2 | 8.49 | 17549.1  | 10.39 HUMAN | ESRF13                                        | DBRD complex subunit KIAA1967 (Fragment)                                  |
| 2840 | dirMS_041712_NAR_50mM_plus2.16703.16703.3  | 3 | 15.14 | 1.240E+05       | (R)DSQVAK(R)D S/V/Y/G/D/E A/L K/Q/L E L A T L K/S)  | 103.05 | 603.1217 | 1801.954 | -0.0036 | -1.2  | 4.41 | 104959.8 | 4.94 HUMAN  | F5G7HR                                        | General vesicular transport factor p115                                   |
| 2841 | dirMS_041712_NAR_50mM_minus.88139.1        | 1 | 15.14 | 2.50E+05 M227m  | (R)IIMKREY(R)K H/V/I/T/A/L/E L E T M Q/K)           | 118.07 | 122.277  | 1548.812 | -0.0019 | -2.4  | 8.15 | 39271.6  | 5.18 HUMAN  | AKN176                                        | Actin, alpha skeletal muscle                                              |
| 2842 | dirMS_041712_NAR_60mM_minus.13847.14329.3  | 3 | 15.14 | 1.982E+06       | (R)IQLVEE(R)R/Q/L/L/V/E E/L R D/A Q/L/R/L)          | 138.58 | 576.6347 | 1727.892 | -0.0027 | -1.6  | 4.25 | 31923.6  | 4.85 HUMAN  | B72596                                        | Tropomyosin alpha-1 chain                                                 |
| 2843 | dirMS_041712_NAR_60mM_minus.15008.15029.3  | 3 | 15.14 | 0.449E+06       | (R)IEHALLA(R)H A/L/L/A/L/V/T/L/L/G V/K/Q/Q)         | 144.57 | 438.9202 | 1314.742 | 0.0044  | 3.4   | 6.85 | 50482.3  | 9.31 HUMAN  | P88104                                        | Elongation factor 1-alpha 1                                               |
| 2844 | dirMS_041712_NAR_50mM_plus.10634.10634.2   | 2 | 15.14 | 0.478E+04       | (K)IGLAAAD(K)H I/L/A/L/D E/S/T/G S/A/V/K/R)         | 145.93 | 666.8531 | 1332.7   | -0.0016 | -1.2  | 4.37 | 30711.4  | 7.15 HUMAN  | H38F98                                        | Fructose-bisphosphate aldolase A (Fragment)                               |
| 2845 | dirMS_041712_NAR_20mM_plus.12947.12947.2   | 2 | 15.14 | 0.495E+05       | (K)LSLELAE(K)S/L/E/L/E/L A/V/L Q/R/A)               | 161.95 | 565.3113 | 1625.621 | -0.002  | -1.8  | 4.53 | 56607.4  | 5.37 HUMAN  | F8V4B4                                        | Keratin, type II cytoskeletal 8                                           |
| 2846 | dirMS_041712_NAR_50mM_plus2.11167.11167.3  | 3 | 15.14 | 0.391E+05       | (K)ILQAEAF(K)I/Q/A/E/A/P H/V V/G S T P G R/I)       | 126.6  | 515.6223 | 1544.854 | -0.002  | -1.3  | 6.75 | 41517.9  | 5.45 HUMAN  | E7EGG2                                        | Eukaryotic initiation factor 4A-II                                        |
| 2847 | dirMS_041712_NAR_120mM_minus.20018.20018.3 | 3 | 15.13 | 0.783E+04       | (R)IINWHL(R)N/I/N/L/W/L/E/L/T D/R/S)                | 165.22 | 470.5897 | 1409.754 | 0.001   | 0.7   | 5.84 | 52064.6  | 5.82 HUMAN  | PE3151                                        | Serine/threonine phosphatase 2A 55 kDa regulatory subunit B alpha isoform |
| 2848 | dirMS_041712_NAR_30mM_minus.17811.17901.2  | 2 | 15.13 | 0.196E+05       | (K)IFFPDP(K)F/I/F/D/P/S/A/R/D)                      | 151.65 | 493.7405 | 986.473  | 0.0007  | 0.7   | 5.84 | 26201.6  | 5.68 HUMAN  | EP9P10                                        | Epiplakin                                                                 |
| 2849 | dirMS_041712_NAR_30mM_minus.18339.18573.2  | 2 | 15.13 | 0.414E+05       | (R)ADLAL(R)R/D/L/I/L/H/V/L/R/K)                     | 154.65 | 453.7668 | 998.529  | -0.002  | -3.5  | 5.88 | 11447.2  | 9.81 HUMAN  | CSJF87                                        | Cytokeratin C (Fragment)                                                  |
| 2850 | dirMS_041712_NAR_50mM_plus.15210.15210.3   | 3 | 15.13 | 0.410E+05       | (K)AETLAEK(K)A E/T/L/A/G S/L/D E/L A/U H T R/N)     | 154.98 | 581.2998 | 1741.872 | 0.0133  | 7.7   | 4.65 | 88242.6  | 5.09 HUMAN  | C9BU11                                        | Cytoslin A (Fragment)                                                     |
| 2851 | dirMS_041712_NAR_120mM_plus.8321.8337.3    | 3 | 15.13 | 1.959E+05       | (R)ITFEEE(R)N/V/T/E/E/K/N E/K/A)                    | 97.13  | 412.8845 | 1236.647 | -0.0081 | -6.5  | 4.79 | 18901.8  | 11.65 HUMAN | F5H152                                        | 60S ribosomal protein L13                                                 |
| 2852 | dirMS_041712_NAR_20mM_plus.9468.9641.2     | 2 | 15.13 | 0.316E+05       | (K)ILVLDG(K)I/L/V/L/D/G/D/G T G T K/T)              | 131.74 | 508.292  | 1015.578 | -0.0015 | -1.5  | 5.84 | 26394.9  | 6.5 HUMAN   | ESMDF5                                        | GTP-binding nuclear protein Ran                                           |
| 2853 | dirMS_041712_NAR_20mM_plus.9802.9801.2     | 2 | 15.13 | 0.146E+05       | (K)IGDVAV(K)Q I/V/I/V/T/A/T/L/E/R/K/I)              | 139.28 | 625.6123 | 2152.642 | -0.0046 | -3.7  | 4.53 | 23633.9  | 11.02 HUMAN | PA4029                                        | 60S ribosomal protein L13a                                                |
| 2854 | dirMS_041712_NAR_120mM_plus.15515.15515.3  | 3 | 15.13 | 0.151E+06       | (R)IADVT(R)R/LA/I/T L V L V/L Q/A/V/L/D G A R/K)    | 149.68 | 657.6802 | 1971.029 | -0.0034 | -1.7  | 5.32 | 71165.3  | 5.57 HUMAN  | C31R13                                        | Claflarin heavy chain 1                                                   |
| 2855 | dirMS_041712_NAR_50mM_plus2.20652.20652.3  | 3 | 15.13 | 1.170E+05       | (R)IVNSKF(R)N N/S/K D/T/V/Q/Q/L/A/Q/K)              | 177.62 | 561.3209 | 1681.952 | -0.0042 | -2.5  | 8.47 | 72626.7  | 9.13 HUMAN  | Q14258                                        | E3 ubiquitin/SGS1 ligase TRIM25                                           |
| 2856 | dirMS_041712_NAR_60mM_plus.10033.10033.2   | 2 | 15.13 | 0.964E+05       | (R)ILESGM(R)EIS G M Q/N/Q/S/U/H/T/K/T)              | 110.1  | 738.3522 | 1475.698 | -0.001  | -0.7  | 6.75 | 56607.4  | 5.37 HUMAN  | F8V4B4                                        | Keratin, type II cytoskeletal 8                                           |
| 2857 | dirMS_041712_NAR_120mM_minus.18191.18191.4 | 4 | 15.12 | 1.315E+05       | (K)ILGSDG(K)I G S G/S/V/S/V/L/H G V F K F/K/E)      | 154.12 | 487.5223 | 1947.073 | -0.0058 | -3    | 10   | 58214.7  | 5.25 HUMAN  | BD40E7                                        | T-complex protein 1 subunit theta                                         |
| 2858 | dirMS_041712_NAR_120mM_plus.7300.7300.3    | 3 | 15.12 | 0.415E+05       | (R)IIVNSKF(R)N N/S/K D/T/V/Q/Q/L/A/Q/K)             | 94.1   | 455.991  | 1368.698 | -0.0016 | -1.1  | 9.6  | 33979.6  | 10.02 HUMAN | C20R10                                        | Claflarin heavy chain 1                                                   |
| 2859 | dirMS_041712_NAR_30mM_plus2.15304.15609.2  | 2 | 15.12 | 0.350E+05       | (R)IVDFEY(R)I Q/V/E/M/S H/L/U/T/L/A/E A/L N V/K)    | 137.48 | 469.582  | 938.509  | -0.0003 | -0.3  | 6    | 23493.8  | 5.45 HUMAN  | F8V7L3                                        | Myosin-10                                                                 |
| 2860 | dirMS_041712_NAR_50mM_minus.11973.11973.3  | 3 | 15.12 | 1.356E+05       | (K)QAVLFLG(K)A/V/L F C/L/S/E/L D K/K/N/K)           | 136.05 | 437.2326 | 1309.682 | -0.0012 | 0.9   | 6.11 | 22956.8  | 8.8 HUMAN   | EP9K25                                        | Cofilin-1                                                                 |
| 2861 | dirMS_041712_NAR_50mM_plus2.17426.17426.3  | 3 | 15.12 | 1.359E+05       | (K)IYPPED(K)K Y/P P P/V/L N/V L G K V/K/K)          | 167.22 | 526.2832 | 1576.837 | -0.0019 | -1.2  | 6.07 | 40763.2  | 6.29 HUMAN  | Q9NR45                                        | Sialic acid synthase                                                      |
| 2862 | dirMS_041712_NAR_50mM_minus.17921.17921.3  | 3 | 15.12 | 1.173E+05       | (K)ITFYVA(R)R/D/L/I/V/A/V/V/R/K)                    | 171.32 | 493.0247 | 1493.605 | -0.002  | -1.7  | 5.32 | 16252.9  | 9.99 HUMAN  | FDI211                                        | 40S ribosomal protein S10 (Fragment)                                      |
| 2863 | dirMS_041712_NAR_60mM_minus.7132.7132.3    | 3 | 15.12 | 3.04E+05        | (R)IELESST(R)E L/E/E/S/Y/T N N A/D/T Q/Q/Q)         | 98.72  | 542.9247 | 1626.761 | -0.001  | 0.6   | 4.68 | 150022.8 | 9.1 HUMAN   | E7EW20                                        | Unconventional myosin-V                                                   |
| 2864 | dirMS_041712_NAR_60mM_minus.9298.9298.3    | 3 | 15.12 | 1.237E+05       | (R)IQDSAA(R)D S/A/N/V/G/D G T K/E/K/Q)              | 111.87 | 486.5639 | 1457.691 | -0.0136 | -3.8  | 4.56 | 61756.2  | 5.24 HUMAN  | Q14247                                        | Src substrate cortactin                                                   |
| 2865 | dirMS_041712_NAR_120mM_plus.11651.11651.2  | 2 | 15.12 | 1.855E+05       | (R)INLKASU(R)N/L/K/A/S/L E N S L R/E)               | 114.02 | 622.8511 | 1244.696 | -0.0008 | -0.6  | 8.75 | 43773.3  | 5.36 HUMAN  | F8V7Y9                                        | Keratin, type I cytoskeletal 18                                           |
| 2866 | dirMS_041712_NAR_20mM_plus.19128.19128.3   | 3 | 15.12 | 0.199E+05       | (R)ITLTSQ(K)I/T/L/T G T S/A/L G/P/A Q/L/A F/K/L)    | 160.26 | 582.6516 | 1745.943 | -0.003  | -1.7  | 5.66 | 120546.6 | 7.82 HUMAN  | Q95486                                        | Protein transport protein Sec22A                                          |
| 2867 | dirMS_041712_NAR_50mM_plus2.10975.10975.3  | 3 | 15.12 | 1.194E+05       | (K)ADSDRG(K)I/D I/R P/K V/Q/V/K/S)                  | 125.1  | 448.2419 | 1342.711 | -0.0027 | -0.2  | 6    | 15633.5  | 9.15 HUMAN  | H38M06                                        | Fructose-bisphosphate aldolase A (Fragment)                               |
| 2868 | dirMS_041712_NAR_50mM_plus2.14296.14315.3  | 3 | 15.12 | 0.111E+06       | (R)IVMAYK(R)N/V/A/T K/P L/N/V/A/L A Q/R/K)          | 143.7  | 514.9811 | 1542.937 | -0.0019 | -1.2  | 9.99 | 65918.2  | 9.74 HUMAN  | E7EQV3                                        | Polyadenylation-binding protein 1                                         |
| 2869 | dirMS_041712_NAR_50mM_plus2.16908.17051.3  | 3 | 15.12 | 1.161E+05       | (K)ISMAPDK(K)S/V/M/P/D I/D L/N L/I/G P K/V)         | 157.08 | 514.2847 | 1540.84  | -0.0008 | -0.5  | 5.96 | 629603.7 | 5.8 HUMAN   | Q90666                                        | Neuroblast differentiation-associated protein ANNA4                       |
| 2870 | dirMS_041712_NAR_50mM_plus2.15971.20032.3  | 3 | 15.12 | 0.471E+05       | (K)HSDG(K)S G S F V G I/P V/T/V/L V/E/K/E)          | 173.82 | 603.6541 | 1808.958 | -0.014  | -5.7  | 6.75 | 83605    | 4.97 HUMAN  | PD0828                                        | Heat shock protein HSP 90-beta                                            |
| 2871 | dirMS_041712_NAR_50mM_plus.12236.12621.3   | 3 | 15.12 | 0.415E+05       | (R)IADVT(R)R/LA/I/T L V L V/L Q/A/V/L/D G A R/K)    | 149.68 | 657.6802 | 1971.029 | -0.0034 | -1.7  | 5.32 | 71165.3  | 5.57 HUMAN  | C31R13                                        | Claflarin heavy chain 1 (Fragment)                                        |
| 2872 | dirMS_041712_NAR_120mM_minus.14076.14076.2 | 2 | 15.11 | 1.439E+06       | (K)IFSDG(K)F A/S/F/V/I R/V/R/E)                     | 130.18 | 541.7968 | 1082.599 | -0.013  | -1.7  | 4.75 | 19569.8  | 9.88 HUMAN  | F8V8G4                                        | Keratin, type II cytoskeletal 8 (Fragment)                                |
| 2873 | dirMS_041712_NAR_30mM_minus.14298.14597.2  | 2 | 15.11 | 0.588E+06       | (K)ILIEEM(K)K/A/V/L E/M/E/Q/R/L)                    | 133.73 | 516.281  | 1031.555 | -0.0007 | -0.6  | 4.53 | 20203.9  | 6.24 HUMAN  | HDY0G0                                        | Creatine kinase B-type (Fragment)                                         |
| 2874 | dirMS_041712_NAR_30mM_plus2.18046.18066.2  | 2 | 15.11 | 0.412E+05       | (R)ILLIAND(R)I/L/L/N/L/V/N L/L/R/E)                 | 153.13 | 599.3487 | 1197.695 | -0.0049 | -4.1  | 5.84 | 19945.8  | 4.97 HUMAN  | BD4D50                                        | F-actin-capping protein subunit alpha-2                                   |
| 2875 | dirMS_041712_NAR_50mM_plus2.12527.12527.2  | 2 | 15.11 | 0.246E+05       | (R)IELEAD(R)E L/A/E/D G T S/A/L G/P/A Q/L/A F/K/L)  | 118.92 | 612.3382 | 1423.67  | -0.0008 | -0.6  | 4    | 13054.7  | 9.59 HUMAN  | EP9H46                                        | 40S ribosomal protein S3                                                  |
| 2876 | dirMS_041712_NAR_30mM_plus2.16992.16992.2  | 2 | 15.11 | 0.545E+05 M256m | (R)IELEAD(R)E L/A/E/D G T S/A/L G/P/A Q/L/A F/K/L)  | 142.22 | 668.8384 | 1320.671 | 1.9598  | 2.3   | 4.03 | 37296.3  | 5.3 HUMAN   | F8V4E4                                        | Keratin, type II cytoskeletal 8                                           |
| 2877 | dirMS_041712_NAR_30mM_plus2.21352.21375.2  | 2 | 15.11 | 0.235E+04       | (R)IGAFQN(R)G A F/Q/N/A/F/D L/Y/V/R/E)              | 167.87 | 633.8315 | 1266.659 | -0.0022 | -2.5  | 9.75 | 68629.9  | 5.59 HUMAN  | E7EVX6                                        | Androgen receptor                                                         |
| 2878 | dirMS_041712_NAR_30mM_plus2.7713.8154.2    | 2 | 15.11 | 0.142E+06       | (K)IYAAAG(K)A/V/A/I/A/D L/Y/V/K/Y/K)                | 94.57  | 569.2905 | 1137.572 | 0.0016  | 1.4   | 8.59 | 31075.7  | 5.65 HUMAN  | PD0174                                        | Triosephosphate isomerase                                                 |
| 2879 | dirMS_041712_NAR_60mM_plus.20646.20646.3   | 3 | 15.11 | 1.714E+05       | (R)IILADG(R)I D/L/A G R D L/T/V/M/N/K/Q)            | 168.28 | 541.9516 | 1624.841 | -0.0008 | -0.5  | 4.43 | 37482.1  | 5.36 HUMAN  | EP9G30                                        | Actin, gamma-entire smooth muscle                                         |
| 2880 | dirMS_041712_NAR_60mM_plus.5214.5214.3     | 3 | 15.11 | 2.64E+05        | (R)IATATY(R)K T/I/T/E/T/L/E T/L/E R/V/R/E)          | 147.77 | 491.5671 | 1298.476 | -0.0018 | -1.1  | 6.75 | 82757.7  | BD04C4      | NADPH-dependent oxidoreductase, mitochondrial |                                                                           |
| 2881 | dirMS_041712_NAR_120mM_minus.6752.7046.2   | 2 | 15.1  | 0.608E+06 M46m  | (R)IHQGVN(R)I Q/I/G/V/M/G M/Q/K/Q/D)                | 91.72  | 594.2863 | 1117.571 | 1.59493 | 0.5   | 8.76 | 32616.5  | 5.18 HUMAN  | AKN176                                        | Actin, alpha skeletal muscle                                              |
| 2882 | dirMS_041712_NAR_40mM_minus.11383.11646.3  | 3 | 15.1  | 0.805E+05       | (R)ITVEYNE(R)I Q/I/V/E/M/S H/L/U/T/L/A/E A/L N V/K) | 151    |          |          |         |       |      |          |             |                                               |                                                                           |

|      |                                             |   |       |                 |                                                    |        |          |          |         |       |      |          |       |       |          |                                                          |
|------|---------------------------------------------|---|-------|-----------------|----------------------------------------------------|--------|----------|----------|---------|-------|------|----------|-------|-------|----------|----------------------------------------------------------|
| 2939 | dirMS_041712_NAR_40mM_minus1.1002.1102.13   | 3 | 15.04 | 0.486E+05       | (RIDAGEG(R)D AIG E Q/LAV/A Q/V D/T Q/E/GV/KP/R)    | 148.02 | 657.0157 | 1969.024 | 0.0089  | 4.5   | 4.32 | 258215.9 | 5.48  | HUMAN | ELF1     | Elongin B                                                |
| 2940 | dirMS_041712_NAR_50mM_minus1.1838.1838.83   | 3 | 15.04 | 0.462E+05       | (KALIEVQ(K)A L(V)/E/L Q/P L I/G E H D A/R R)       | 175.42 | 401.0139 | 1801.033 | -0.0059 | -3.3  | 5.4  | 53068.8  | 5.83  | HUMAN | P23181   | Tryptophan-tRNA ligase, cytoplasmic                      |
| 2941 | dirMS_041712_NAR_50mM_minus1.935.913.23     | 3 | 15.04 | 0.348E+05       | (KQVADK(R)KVA/D I D/V/S/V/T A N S/K)               | 120.87 | 504.2624 | 1510.777 | -0.0021 | -1.4  | 5.56 | 25435.8  | 5.52  | HUMAN | AKR60502 | Lactate dehydrogenase (Fragment)                         |
| 2942 | dirMS_041712_NAR_20mM_plus1.1395.1395.21    | 2 | 15.04 | 0.212E+05 M98m  | (RITLTVQ(R)T L(T)/V/D/V G I/G A/V T/K R)           | 167.5  | 683.3671 | 1349.735 | 1.9924  | -1.8  | 5.5  | 20151.2  | 4.58  | HUMAN | GSV218   | Heat shock protein HSP 90-alpha (Fragment)               |
| 2943 | dirMS_041712_NAR_50mM_plus1.1203.14574.3    | 3 | 15.04 | 1.120E+06       | (KJTDHNG(K)Q/V/DI/V)G K E G/V/G/P S L R(L)G)       | 144.28 | 618.6652 | 1853.997 | -0.0157 | -8.5  | 4.41 | 267260.7 | 5.95  | HUMAN | U31085   | Acetyl-CoA carboxylase 1                                 |
| 2944 | dirMS_041712_NAR_30mM_minus1.12953.13079.2  | 2 | 15.03 | 0.284E+05       | (KLSLEP(E)K)S E L(L)I/P/T G D/L R(F)               | 124.53 | 643.8325 | 1286.659 | -0.0009 | -0.7  | 4.4  | 266161   | 5.68  | HUMAN | EP9P10   | Epilpakin                                                |
| 2945 | dirMS_041712_NAR_60mM_plus1.7674.7674.2     | 1 | 15.03 | 1.560E+05       | (KQVADK(R)KVA/D I D/V/S/V/T A N S/K)               | 102.58 | 504.2624 | 1510.777 | -0.0021 | -1.4  | 5.56 | 25435.8  | 5.52  | HUMAN | AKR60502 | Lactate dehydrogenase (Fragment)                         |
| 2946 | dirMS_041712_NAR_20mM_plus1.12632.12632.12  | 2 | 15.03 | 0.934E+04 M91m  | (RJIATGAS(R)A I(T)G/A/S/L D/I D A/R R)             | 159.03 | 639.3398 | 1261.682 | 1.5903  | 3.6   | 5.88 | 17656.4  | 11.01 | HUMAN | CIN1W5   | 60S ribosomal protein L24                                |
| 2947 | dirMS_041712_NAR_20mM_plus1.13538.13538.2   | 2 | 15.03 | 1.600E+05 M98m  | (RITLTVQ(R)T L(T)/V/D/V G I/G/V/T/K R)             | 165.8  | 683.3671 | 1349.735 | 1.9924  | -1.8  | 5.5  | 20151.2  | 4.58  | HUMAN | GSV218   | Heat shock protein HSP 90-alpha (Fragment)               |
| 2948 | dirMS_041712_NAR_50mM_plus1.19863.19863.3   | 3 | 15.03 | 0.250E+05       | (KJLHFHTS(K)L/P/L F H T S/L)P A/E I/A P G K(L)     | 172.83 | 580.9943 | 1740.968 | 0.0     | 0     | 6.75 | 108105.4 | 6.57  | HUMAN | ET900    | Protein transport protein Sec24C                         |
| 2949 | dirMS_041712_NAR_120mM_minus1.9163.9163.2   | 2 | 15.02 | 0.474E+05       | (KHPFVLS(K)H/P/H)F/L V/L Q/P L I/G E H D A/R R)    | 103.53 | 609.8267 | 1218.648 | -0.0016 | -1.3  | 8.76 | 63374.2  | 6.64  | HUMAN | PH0744   | Glucose-6-phosphatase isomerase                          |
| 2950 | dirMS_041712_NAR_30mM_minus1.1295.1295.2    | 2 | 15.02 | 0.277E+04       | (KLSLVP(E)K)S Y(L)I/P/T G D/L R(F)                 | 120.4  | 487.9745 | 1201.001 | -0.0018 | -1.8  | 8.59 | 22995.2  | 6.9   | HUMAN | L10P48   | Glucocorticoid-inducible protein C16orf68                |
| 2951 | dirMS_041712_NAR_50mM_minus1.10818.10818.3  | 3 | 15.02 | 1.604E+05       | (RJIAEFTTR(K)A/E)F V T N L/Y/E E E E K(S)K(S)      | 130.4  | 623.6418 | 1868.912 | -0.0015 | -0.8  | 4.32 | 227783.5 | 5.5   | HUMAN | P35579   | Mysin-9                                                  |
| 2952 | dirMS_041712_NAR_50mM_minus1.13676.13676.3  | 3 | 15.02 | 0.743E+04       | (KJMLDAE(K)M/D/A/E D/V I/V T A R/P D R/E/K)        | 146.2  | 606.2965 | 1816.875 | 0.0004  | 0.2   | 4.1  | 105308.6 | 5.27  | HUMAN | AD3707   | Alpha-actinin-4                                          |
| 2953 | dirMS_041712_NAR_50mM_minus1.15992.15992.3  | 3 | 15.02 | 0.238E+05       | (KJADGDS(K)A/Q/V/D G S H P L/S Q/D L I E K(V)      | 159.08 | 584.3069 | 1750.897 | 0.001   | 1.8   | 5.4  | 128233.4 | 7.06  | HUMAN | BTZL00   | Protein transport protein Sec31A                         |
| 2954 | dirMS_041712_NAR_60mM_minus1.1791.18151.3   | 3 | 15.02 | 0.133E+05       | (KQVADK(R)KVA/D I D/V/S/V/T A N S/K)               | 161.62 | 524.0157 | 1854.004 | -0.0004 | 0.3   | 6.71 | 227783.5 | 5.5   | HUMAN | P35579   | Mysin-9                                                  |
| 2955 | dirMS_041712_NAR_50mM_plus1.12513.12513.2   | 2 | 15.02 | 0.119E+05       | (KJMSWAC(K)S/V)A/D S C/T N C/A L P L R K(Q)        | 155.85 | 917.4626 | 1833.92  | -0.0018 | -1.1  | 8.75 | 31718.5  | 7.17  | HUMAN | ET7U74   | Glyceroldehyde-3-phosphate dehydrogenase                 |
| 2956 | dirMS_041712_NAR_20mM_plus1.13704.13764.2   | 2 | 15.02 | 0.208E+05       | (KJAPILIAT(K)P I(L)I/L I/A/T D/V A S R(G)          | 166.65 | 613.8559 | 1226.71  | -0.0058 | -4.7  | 5.88 | 61018.6  | 9.44  | HUMAN | BADLW8   | Probable ATP-dependent RNA helicase DXS5                 |
| 2957 | dirMS_041712_NAR_30mM_plus1.18421.18555.2   | 2 | 15.02 | 0.178E+05       | (R)NINP(GT) (R)N)H/P/G/T/L L/M V/S K(L)            | 195.83 | 634.8801 | 1268.757 | -0.0043 | -3.4  | 8.75 | 37884.5  | 11.27 | HUMAN | H3B8M9   | 60S ribosomal protein L4                                 |
| 2958 | dirMS_041712_NAR_30mM_plus1.10588.10588.2   | 2 | 15.02 | 0.347E+05       | (K)YSYVQ(L)K)S/V)Y V Q/L R(E)                      | 108.8  | 418.7442 | 838.488  | -0.0005 | -7.8  | 8.56 | 334221.3 | 6.44  | HUMAN | P15524   | Desmoplamin                                              |
| 2959 | dirMS_041712_NAR_30mM_plus1.13358.13359.2   | 2 | 15.02 | 0.570E+05       | (K)KPTFGM(K)G)P/FIT/G V/S V/L(R)                   | 122.88 | 575.7876 | 1150.567 | 0.0006  | 0.5   | 9.75 | 18601.6  | 10.52 | HUMAN | PR2280   | 40S ribosomal protein S11                                |
| 2960 | dirMS_041712_NAR_30mM_plus1.22647.22659.3   | 3 | 15.02 | 0.500E+05       | (R)JALVTG(R)A L(V) V/P/E V/T Q/V/Q/F/D A/K(N)      | 175.77 | 553.9697 | 1659.895 | -0.0007 | -0.4  | 4.37 | 40069.4  | 4.83  | HUMAN | ET9W11   | Tubulin beta chain                                       |
| 2961 | dirMS_041712_NAR_30mM_plus1.7539.7559.2     | 2 | 15.02 | 0.808E+05       | (R)JLVAAG(R)R)Q/E I/A/A/Q/E A/R(L)                 | 93.83  | 508.2801 | 1015.553 | -0.0025 | -0.6  | 6    | 533778   | 5.74  | HUMAN | Q15149   | Plectin                                                  |
| 2962 | dirMS_041712_NAR_120mM_minus1.14084.14374.3 | 3 | 15.01 | 1.440E+06       | (R)JRLCAAT(R)R C L(A)A/V I/L/D I/L Q/R(Q)          | 112.32 | 449.1626 | 1347.738 | -0.0147 | -10.9 | 6.07 | 15862.5  | 9.61  | HUMAN | BAD730   | Tubulin-specific chaperone A                             |
| 2963 | dirMS_041712_NAR_20mM_minus1.9696.9716.2    | 2 | 15.01 | 0.336E+05       | (K)IGGGTQ(K)G)G E I(H) T/V/P V A R(K)              | 147.47 | 531.3075 | 1025.611 | -0.0002 | -2.4  | 9.75 | 50482.3  | 4.58  | HUMAN | PR8104   | Elongation factor 1-alpha 1                              |
| 2964 | dirMS_041712_NAR_30mM_minus1.15572.15572.2  | 2 | 15.01 | 0.145E+05       | (K)AMTQV(K)K)A M/T/G/Q/V G/P/W/P/R(Y)              | 138.32 | 669.3172 | 1337.631 | -0.0036 | -2.7  | 6.04 | 56186.7  | 5.47  | HUMAN | BADUR8   | T-complex protein 1 subunit gamma                        |
| 2965 | dirMS_041712_NAR_30mM_minus1.19359.19505.2  | 2 | 15.01 | 0.242E+05       | (R)FEELNAL(R)E)E I/E L N A/D/U/L P(K)              | 160.88 | 627.3141 | 1253.616 | -0.0048 | -3.9  | 4.14 | 45508.6  | 5.5   | HUMAN | AKB7Q2   | Heat shock cognate 7.1 kDa protein                       |
| 2966 | dirMS_041712_NAR_40mM_minus1.12399.12399.3  | 3 | 15.01 | 0.170E+05       | (R)IGPAPSS(R)E A/P/P S S A H/D F/H G L/P K(G)      | 155.92 | 593.6401 | 1778.907 | -0.0014 | -0.8  | 5.32 | 100478.9 | 5.71  | HUMAN | ABM0X9   | Matrin-3                                                 |
| 2967 | dirMS_041712_NAR_50mM_minus1.921.9216.2     | 2 | 15.01 | 0.232E+05 M240m | (R)JLVAAG(R)R)Q/E I/A/A/Q/E A/R(L)                 | 136.73 | 614.1219 | 1015.553 | -0.0025 | -0.6  | 6    | 533778   | 5.74  | HUMAN | Q15149   | Plectin                                                  |
| 2968 | dirMS_041712_NAR_50mM_minus1.11664.11664.3  | 3 | 15.01 | 0.112E+05       | (R)VTGCPN(R)G)T/C/P H N I/P D/L V/E D R(E)         | 137.47 | 631.641  | 1898.907 | -0.0019 | -1    | 4.54 | 25588.6  | 9.3   | HUMAN | ET1A61   | Alpha-actinin-4                                          |
| 2969 | dirMS_041712_NAR_50mM_minus1.14082.14082.3  | 3 | 15.01 | 0.340E+05       | (R)KSPAP(L)K)S/P/A)P P L/H V A L/Q G M(K)          | 148.48 | 500.2271 | 1498.874 | -0.0153 | -10.2 | 8.49 | 17549.1  | 10.39 | HUMAN | ET9W11   | Tubulin beta chain                                       |
| 2970 | dirMS_041712_NAR_50mM_minus1.8922.8924.3    | 3 | 15.01 | 1.131E+05 M227m | (R)M)KXET(R)R)Q E I(T)A(L)I/P A/P S M(K)           | 114.85 | 522.2727 | 1548.812 | 1.1951  | 2.4   | 8.35 | 32616.5  | 5.18  | HUMAN | AE6176   | Actin, alpha skeletal muscle                             |
| 2971 | dirMS_041712_NAR_30mM_plus1.1353.1353.2     | 2 | 15.01 | 0.232E+05 M54m  | (K)LSLEP(E)K)S E L(L)I/P/T G D/L R(F)              | 120.5  | 487.9745 | 1201.001 | -0.0018 | -1.8  | 8.59 | 22995.2  | 6.9   | HUMAN | PH0777   | Glucose-6-phosphatase isomerase                          |
| 2972 | dirMS_041712_NAR_20mM_plus1.13157.13258.2   | 2 | 15.01 | 0.676E+05       | (R)YLDQAS(R)Y/L)A/Q/L V/G V/L(Q)                   | 164.38 | 485.8004 | 970.593  | 0.0004  | 0.4   | 5.97 | 16600.2  | 10.31 | HUMAN | PS9109   | 40S ribosomal protein S19                                |
| 2973 | dirMS_041712_NAR_20mM_plus1.18875.18875.2   | 2 | 15.01 | 0.232E+05       | (R)JTLAGP(R)H)T J/L A/G/P/T P A I R(K)             | 160.97 | 679.9039 | 1358.804 | -0.0037 | -2.7  | 8.75 | 32621    | 8.75  | HUMAN | BADLCO   | Poly(C)-binding protein 2                                |
| 2974 | dirMS_041712_NAR_30mM_plus1.17947.18108.2   | 2 | 15.01 | 0.300E+05       | (R)JNVPALA(R)N)I/P A/L A/E V/L N I R(S)            | 147.82 | 605.3509 | 1209.695 | -0.0005 | -0.4  | 5.97 | 20026.6  | 4.67  | HUMAN | EP9IK5   | Ribonuclease inhibitor (Fragment)                        |
| 2975 | dirMS_041712_NAR_40mM_plus1.18195.18409.3   | 3 | 15.01 | 1.159E+06       | (R)IGDGLQ(R)G D L I(G)E/P/T A E K E V F L A Q K(G) | 173.97 | 610.8115 | 1828.022 | -0.0015 | -0.8  | 4.68 | 18466.1  | 5.78  | HUMAN | H3B8U3   | Pyruvate kinase (Fragment)                               |
| 2976 | dirMS_041712_NAR_50mM_plus1.15117.15117.3   | 3 | 15.01 | 0.753E+05       | (R)JYVAGS(R)R)A L/V V S E M/P)I/L T R(Q)           | 137.98 | 520.6139 | 1559.89  | -0.0031 | -2.1  | 6.72 | 64042.3  | 6.96  | HUMAN | GRN1C4   | Leucine-rich repeat-containing protein 47                |
| 2977 | dirMS_041712_NAR_50mM_plus1.9307.9307.2     | 3 | 15.01 | 0.133E+05       | (K)AETLVA(K)A E)T L/V/A T K/P K(L)                 | 116.23 | 433.922  | 1299.752 | -0.0004 | -0.3  | 6.18 | 98761.7  | 5.56  | HUMAN | Q9UBF2   | Coatomer subunit gamma-2                                 |
| 2978 | dirMS_041712_NAR_60mM_plus1.5212.5212.3     | 3 | 15.01 | 0.408E+05       | (K)YSSAEG(K)S)S A/E/G/A/A/K E/E R(K)               | 85.05  | 434.8867 | 1302.654 | -0.008  | -6.2  | 4.79 | 48016.7  | 11.17 | HUMAN | F22Z66   | Non-histone chromosomal protein HMG-14                   |
| 2979 | dirMS_041712_NAR_20mM_minus1.10877.10877.2  | 2 | 15    | 0.150E+06 M92m  | (R)M)NFTS(R)R)I)T)T)S V/P/S/P R(K)                 | 157.1  | 668.3513 | 1319.703 | 1.1925  | -1.8  | 8.75 | 42831.5  | 4.86  | HUMAN | AKR654   | HCG13935A, isoform CRA 1                                 |
| 2980 | dirMS_041712_NAR_13539.13539.3              | 3 | 15    | 3.608E+05       | (R)JLVAAG(R)R)Q/E I/A/A/Q/E A/R(L)                 | 93.83  | 508.2801 | 1015.553 | -0.0025 | -0.6  | 6    | 533778   | 5.74  | HUMAN | Q15149   | Plectin                                                  |
| 2981 | dirMS_041712_NAR_50mM_plus1.9055.9055.3     | 3 | 15    | 0.704E+04       | (R)IEEMAL(R)E)E I/E L N A/D/U/L P(K)               | 115.77 | 615.6611 | 1844.973 | -0.0038 | -2.1  | 6.85 | 272689.3 | 5.79  | HUMAN | O15200   | O15200, SPECTRIN, brain, non-erythrocytic 1              |
| 2982 | dirMS_041712_NAR_120mM_plus1.16387.16387.4  | 4 | 15    | 1.130E+06       | (R)JYAEVH(R)Y)A/E I/H V H/T L/D/G/T K(R)S)         | 142.88 | 498.9885 | 1712.933 | -0.0008 | -0.5  | 6.75 | 21320    | 6.36  | HUMAN | HYD0C4   | V-type proton ATPase subunit B, brain isoform (Fragment) |
| 2983 | dirMS_041712_NAR_120mM_plus1.22933.22933.3  | 3 | 15    | 1.481E+05       | (K)IGLAPU(K)G)L I/A/P/D L/P E D L V H I K(R)       | 174    | 608.0076 | 1822.011 | -0.0027 | -1.5  | 5.38 | 16789.5  | 10.63 | HUMAN | J3KMV5   | 40S ribosomal protein S13                                |
| 2984 | dirMS_041712_NAR_60mM_plus1.8532.9532.3     | 3 | 15    | 0.599E+05       | (K)S)ADG(R)S)A/E)G I/S/G I/S/P/S T)K(R)            | 102.25 | 446.9857 | 1138.701 | 0.0007  | 1.1   | 5.4  | 34596.2  | 9.84  | HUMAN | PH0777   | Glucose-6-phosphatase isomerase                          |
| 2985 | dirMS_041712_NAR_120mM_minus1.9020.9020.2   | 2 | 14.99 | 0.598E+05       | (K)H)FVSLS(K)H)F/L V/L S T/T T T K(Y)              | 103.33 | 609.8267 | 1218.648 | -0.0016 | -1.3  | 8.76 | 63374.2  | 6.64  | HUMAN | PH0744   | Glucose-6-phosphatase isomerase                          |
| 2986 | dirMS_041712_NAR_30mM_minus1.10859.10859.2  | 2 | 14.99 | 0.105E+06       | (R)JTLTVQ(R)Y)S I/F/T/T T/A R(E)                   | 111.93 | 566.7699 | 1132.527 | 0.0056  | 4.9   | 6    | 23901.9  | 5.28  | HUMAN | IBL1U9   | Actin, cytoplasmic 2, N-terminally processed (Fragment)  |
| 2987 | dirMS_041712_NAR_30mM_minus1.14619.15007.2  | 2 | 14.99 | 0.164E+07       | (K)YSYLQ(C)K)S)W/L)A/Q/Q/D(K)T)                    | 134.22 | 515.7847 | 1030.568 | -0.0059 | -5.7  | 8.75 | 13588.1  | 4.66  | HUMAN | FBV767   | Keratin, type II cytoskeletal 8 (Fragment)               |
| 2988 | dirMS_041712_NAR_30mM_minus1.18847.18882.2  | 2 | 14.99 | 0.191E+05       | (K)C)FYSVQ(K)I)F)S I/L/Q)F C(K)S)                  | 157.42 | 559.2673 | 1171.517 | 0.0104  | 9.3   | 8.75 | 83723.6  | 5.55  | HUMAN | PI3100   | X-ray repair cross-complementing protein 5               |
| 2989 | dirMS_041712_NAR_50mM_minus1.14385.14413.3  | 3 | 14.99 | 0.200E+05       | (R)JTLVAGP(R)H)T J/L A/G/P/T P A I R(K)            | 160.97 | 679.9039 | 1358.804 | -0.0037 | -2.7  | 8.75 | 32621    | 8.75  | HUMAN | Q9E2E9   | Enhancer of mRNA-decapping protein 1                     |
| 2990 | dirMS_041712                                |   |       |                 |                                                    |        |          |          |         |       |      |          |       |       |          |                                                          |









|      |                                            |   |      |           |                                                  |        |          |          |         |       |      |          |       |       |         |                                                              |
|------|--------------------------------------------|---|------|-----------|--------------------------------------------------|--------|----------|----------|---------|-------|------|----------|-------|-------|---------|--------------------------------------------------------------|
| 3375 | dirMS_041712_NAR_30mM_plus2.17780.18166.2  | 2 | 1456 | 0.292E+06 | (R)GFSLEE(R)G FJLS/LE/L/R/Q                      | 147.47 | 475.7563 | 950.494  | 0.012   | 11.7  | 4.53 | 18901.8  | 11.65 | HUMAN | FSH152  | 60S ribosomal protein L13                                    |
| 3376 | dirMS_041712_NAR_30mM_plus2.18458.18458.2  | 2 | 1456 | 0.236E+05 | (K)GNVNI(K)G NFN/VYI/PT/RI                       | 150.27 | 630.8035 | 1260.601 | -0.001  | -0.8  | 6    | 20513.6  | 4.62  | HUMAN | J3K65   | Myosin regulatory light chain 12A                            |
| 3377 | dirMS_041712_NAR_30mM_plus2.18515.1815.2   | 2 | 1456 | 0.631E+04 | (S)FADG(S)R F A Q D L/V/L/R/K                    | 108.11 | 550.4678 | 1095.567 | -0.003  | -1.1  | 5.8  | 24678.2  | 6.09  | HUMAN | NP0U    | Non-POU domain-containing octamer-binding protein (Fragment) |
| 3378 | dirMS_041712_NAR_30mM_minus2.13828.13828.2 | 2 | 1455 | 0.226E+05 | (K)S5YDEK(K)S VY/E V/P V/K                       | 128.3  | 550.2855 | 1095.567 | -0.003  | -3    | 5.66 | 258215.9 | 5.48  | HUMAN | F5HM5   | Filamin-B                                                    |
| 3379 | dirMS_041712_NAR_30mM_minus2.7424.7424.3   | 3 | 1455 | 0.197E+04 | (R)JAVEV(R)A VIE/V Q/G/S V/E/G/D/H C/K           | 109.23 | 537.2631 | 1069.782 | -0.009  | -4.3  | 4.65 | 629603.7 | 5.8   | HUMAN | OQ9666  | Neuroblast differentiation-associated protein ANNAK          |
| 3380 | dirMS_041712_NAR_60mM_plus2.14245.14479.3  | 3 | 1455 | 1.130E+06 | (R)MSMKR(R)M S/M K E V/Q D G[M]L/N/V/Q/K/K       | 104.47 | 641.9701 | 1923.897 | -0.015  | -0.8  | 4.68 | 40069.4  | 4.83  | HUMAN | FEWR1   | Tubulin beta chain                                           |
| 3381 | dirMS_041712_NAR_20mM_plus2.13569.13569.2  | 2 | 1455 | 0.142E+05 | (K)MIDAR(K)M S/D A/V/V/L/R/V                     | 102.56 | 586.7957 | 1112.797 | 15.9922 | 5     | 437  | 31380.8  | 9.26  | HUMAN | EP902   | Malaria 60S ribosome, mitochondrial                          |
| 3382 | dirMS_041712_NAR_30mM_plus2.11539.11578.2  | 2 | 1455 | 0.145E+05 | (K)MIVLE(K)M L/V/VE/Q/C/K                        | 113.97 | 510.764  | 1020.522 | -0.009  | -0.9  | 5.75 | 49982    | 5.86  | HUMAN | 84D0F8  | T-complex protein 1 subunit epsilon                          |
| 3383 | dirMS_041712_NAR_30mM_plus2.12967.13278.2  | 2 | 1455 | 0.115E+06 | (K)MIVITAG(K)H/LV/I/T/A/G A/R(Q)                 | 122.35 | 457.2931 | 913.583  | -0.004  | -4.4  | 9.75 | 12539.4  | 5.78  | HUMAN | FSQKX   | L-lactate dehydrogenase A chain (Fragment)                   |
| 3384 | dirMS_041712_NAR_30mM_plus2.14481.14752.2  | 2 | 1455 | 0.695E+05 | (R)LSLVAI(R)S L/S/L/A/V/L/L/K                    | 129.82 | 512.2888 | 1023.572 | -0.018  | -1.7  | 5.72 | 533778   | 5.74  | HUMAN | Q15149  | Plectin                                                      |
| 3385 | dirMS_041712_NAR_30mM_plus2.14567.14735.2  | 2 | 1455 | 0.253E+05 | (R)S5AYR(K)S I(G)E/V/L/V/R(Q)                    | 129.85 | 526.2726 | 1051.542 | -0.009  | -3.7  | 4.37 | 470342.8 | 6.83  | HUMAN | F7E1Y0  | DNA-dependent protein kinase catalytic subunit               |
| 3386 | dirMS_041712_NAR_30mM_plus2.18927.18927.2  | 2 | 1455 | 0.203E+05 | (R)S5VYR(K)S V/L/V/L/V/P/V/R(A)                  | 150.56 | 724.3149 | 1447.738 | -0.012  | -2.1  | 5.88 | 39548.2  | 7.12  | HUMAN | EP902   | Protein transport protein Sec23A                             |
| 3387 | dirMS_041712_NAR_30mM_plus2.7432.7432.5    | 2 | 1455 | 0.100E+06 | (R)IADGVE(R)A I(D)G/Q/V/A/A/R(V)                 | 93.37  | 547.2595 | 1093.527 | -0.155  | -14.2 | 4.37 | 49982    | 5.86  | HUMAN | 84D0F8  | T-complex protein 1 subunit epsilon                          |
| 3388 | dirMS_041712_NAR_40mM_plus2.16881.17057.3  | 3 | 1455 | 1.308E+05 | (R)JLVFNIG(R)F/V/G/N/L/P/D I T E F D F K R(L)    | 166.38 | 665.3502 | 1994.023 | 0.013   | 6.6   | 4.32 | 58856.7  | 6.26  | HUMAN | QBWF3   | Paraspeckle component 1                                      |
| 3389 | dirMS_041712_NAR_30mM_plus2.13187.13180.3  | 3 | 1455 | 1.102E+06 | (R)S5VYR(K)S V/V/V/V/N E/V/G T G V/P/R(A)        | 125.95 | 606.3113 | 1816.923 | -0.035  | -1.9  | 8.43 | 27549.9  | 4.39  | HUMAN | EP91U4  | Tubulin beta chain                                           |
| 3390 | dirMS_041712_NAR_50mM_plus2.17557.17573.3  | 3 | 1455 | 1.176E+05 | (R)RTVGSUR(R) T Y Q/DLII/V(D) L S/D/R(Q)         | 148.8  | 516.8887 | 1042.848 | -0.005  | -0.3  | 4.56 | 43773.3  | 5.26  | HUMAN | FBV29   | Keratin, type I cytoskeletal 18                              |
| 3391 | dirMS_041712_NAR_120mM_minus1.7743.17743.3 | 3 | 1454 | 1.185E+05 | (R)JAGKLP(R)A G K/L D P/H/L/V L Q/L/R(Q)         | 151.48 | 525.6385 | 1574.901 | -0.004  | -2.0  | 6.79 | 23493.8  | 5.45  | HUMAN | FB7L3   | Myosin-10                                                    |
| 3392 | dirMS_041712_NAR_50mM_minus1.4877.14877.3  | 3 | 1454 | 1.284E+05 | (R)EAVTEL(R)E AV/VTE/L/V/G P D R E K(Q)          | 152.37 | 566.9683 | 1698.891 | -0.005  | -0.3  | 4.25 | 25685.9  | 6.4   | HUMAN | EP971   | Transtin                                                     |
| 3393 | dirMS_041712_NAR_120mM_plus2.14519.15064.3 | 3 | 1454 | 1.352E+06 | (R)KFKLDG(R)R F/P/L/D(V)G I(V)S/V/K(Q)           | 131.25 | 453.5709 | 1298.699 | -0.009  | -0.7  | 6.07 | 20931.1  | 10.28 | HUMAN | DR64A   | 60S ribosomal protein L9 (Fragment)                          |
| 3394 | dirMS_041712_NAR_30mM_plus2.12376.12385.2  | 2 | 1454 | 0.781E+05 | (K)SYPYTK(K)S I(V)Y/V/T/E/S/K                    | 119.27 | 580.796  | 1160.583 | 0.013   | 1.2   | 5.72 | 16789.1  | 8.77  | HUMAN | HDY55   | Heat shock protein HSP 90-beta (Fragment)                    |
| 3395 | dirMS_041712_NAR_30mM_plus2.7580.7602.2    | 2 | 1454 | 0.124E+05 | (K)SMAAT(K)S A I/A/T/V/L/R/E/P(T)                | 93.52  | 466.7467 | 992.483  | 0.032   | 3.2   | 5.72 | 83344.9  | 10.18 | HUMAN | EP909   | Bcl-2-associated transcription factor 1 (Fragment)           |
| 3396 | dirMS_041712_NAR_50mM_plus2.10119.10236.3  | 3 | 1454 | 0.615E+05 | (K)S5GDEI(K)G V/Q/G/E/V/N/P G I V/S/K(D)         | 121.05 | 504.2907 | 1510.859 | -0.012  | -0.8  | 6.11 | 51679.1  | 9.11  | HUMAN | P41091  | Eukaryotic translation initiation factor 2 subunit 3         |
| 3397 | dirMS_041712_NAR_50mM_plus2.18250.18627.3  | 3 | 1454 | 1.552E+05 | (K)NAAAG(K)M A I/G A/G/L/D L/K/L/E/L/K(Q)        | 105.65 | 492.601  | 1355.789 | -0.008  | -0.6  | 6.07 | 13786.8  | 9.33  | HUMAN | ET2451  | Transcription elongation factor A protein 1                  |
| 3398 | dirMS_041712_NAR_30mM_plus2.12059.12138.3  | 3 | 1454 | 1.153E+06 | (K)SYPYTK(K)M K E G N/H/V/L/V/E/V/L/R(Q)         | 100.35 | 507.9187 | 1505.745 | 15.9966 | 1     | 4.79 | 18240.4  | 7.96  | HUMAN | PE637Y  | Peptidyl-prolyl cis-trans isomerase A                        |
| 3399 | dirMS_041712_NAR_60mM_plus2.17939.17940.3  | 3 | 1454 | 1.160E+05 | (K)MILLER(K)U/L/V/L/E/L/E/Q/Q/K/Q(S)             | 150.19 | 533.9717 | 1539.911 | -0.009  | -0.4  | 6.14 | 49709.6  | 6.14  | HUMAN | 8RVC4   | Vimentin                                                     |
| 3400 | dirMS_041712_NAR_120mM_minus1.11078.1140.3 | 3 | 1453 | 1.777E+05 | (R)RFDAD(R)R F D A/V I/V/Q/D/S/M/K(H)            | 115.05 | 470.8939 | 1410.668 | -0.001  | -0.7  | 4.43 | 20069.4  | 6.74  | HUMAN | EP9354  | Heat shock cognate 71 kDa protein (Fragment)                 |
| 3401 | dirMS_041712_NAR_30mM_minus2.10978.10978.2 | 2 | 1453 | 0.582E+05 | (K)IAGVGG(K)V A/G/Q/D/G/S V/V/V/Q(I/K)           | 113.8  | 617.824  | 1234.643 | -0.019  | -1.5  | 5.81 | 17127.4  | 10.05 | HUMAN | AMBU27  | Small ubiquitin-related modifier 3                           |
| 3402 | dirMS_041712_NAR_120mM_plus2.10386.10662.3 | 3 | 1453 | 1.383E+05 | (K)KIGENY(K)K V G E N V/V I Y H/N/E/A/T/R(H)     | 80.4   | 519.5943 | 1556.77  | -0.002  | -1.3  | 6.14 | 266161   | 5.68  | HUMAN | EP9P10  | Epiplakin                                                    |
| 3403 | dirMS_041712_NAR_20mM_plus2.18630.18630.2  | 2 | 1453 | 0.145E+05 | (R)S5VYR(K)S V/L/V/L/V/P/V/R(A)                  | 200.78 | 625.1588 | 1847.851 | -0.009  | -2.1  | 6.07 | 13880.6  | 6.83  | HUMAN | EP902   | Creative kinase B-type (Fragment)                            |
| 3404 | dirMS_041712_NAR_30mM_plus2.971.9854.2     | 2 | 1453 | 0.352E+05 | (R)EYKAVI(K)Y A I/E/V/A/T/R(Q)                   | 81.63  | 495.2125 | 809.415  | 0.025   | 3.1   | 6    | 41827.5  | 7     | HUMAN | BZ77A9  | Phosphoglycerate kinase                                      |
| 3405 | dirMS_041712_NAR_40mM_plus2.18220.18411.3  | 3 | 1453 | 1.286E+05 | (R)YVAALK(R)V A A/K F L/V/A I/P/S/D A I K(2)     | 174.02 | 584.3591 | 1751.068 | -0.005  | -2.8  | 6.04 | 24273.5  | 8.98  | HUMAN | HDY49   | Electron transfer flavoprotein subunit alpha, mitochondrial  |
| 3406 | dirMS_041712_NAR_30mM_plus2.16005.16005.3  | 3 | 1453 | 0.109E+06 | (R)LSFQHD(R)A S/L F Q/D P/E/T/V/L/V/L/R I(K)     | 150.8  | 580.9801 | 1740.928 | -0.022  | -1.2  | 5.32 | 96827.3  | 5.58  | HUMAN | EP9P17  | Neutral alpha-glucosidase AB                                 |
| 3407 | dirMS_041712_NAR_30mM_plus2.12362.12362.2  | 2 | 1453 | 0.123E+05 | (R)S5VYR(K)S V/L/V/L/V/P/V/R(A)                  | 107.3  | 588.3173 | 1142.919 | -0.003  | -1.9  | 4.72 | 24193.8  | 6.83  | HUMAN | EP902   | Hepatitis-derived growth factor                              |
| 3408 | dirMS_041712_NAR_60mM_minus2.7860.7943.3   | 3 | 1452 | 1.522E+05 | (R)IADGVE(R)A I(D)G/Q/V/A/A/R(V)                 | 93.63  | 508.5978 | 1523.781 | -0.004  | -0.6  | 4.56 | 12721.6  | 6.75  | HUMAN | 84D0V12 | Ubiquitin                                                    |
| 3409 | dirMS_041712_NAR_20mM_plus2.18720.18720.2  | 2 | 1452 | 0.101E+05 | (K)MIVYTT(K)U/L/V/V/V/T/L V/D/V T(K)             | 200.8  | 683.8948 | 1366.783 | -0.025  | -1.4  | 5.83 | 42194.9  | 8.75  | HUMAN | ETEMMA  | Acid ceramidase                                              |
| 3410 | dirMS_041712_NAR_30mM_plus2.20041.20041.2  | 2 | 1452 | 0.671E+05 | (K)SYPYTK(K)S Y E/L/P/D/G Q/V I/T I G N E/R(P)   | 159.7  | 895.9487 | 1790.892 | -0.018  | -1    | 4.14 | 120397.1 | 5.83  | HUMAN | AS43E0  | POT1 anchor domain family member F                           |
| 3411 | dirMS_041712_NAR_30mM_plus2.6303.6303.2    | 2 | 1452 | 0.258E+05 | (K)SVAIOL(K)S A/V/L/V/L/A/R(Q)                   | 87.2   | 437.2414 | 873.479  | -0.003  | -3.8  | 5.72 | 28218.2  | 9.35  | HUMAN | FK638   | Cotumer subunit gamma-2                                      |
| 3412 | dirMS_041712_NAR_60mM_plus2.9432.9432.2    | 2 | 1452 | 0.127E+06 | (K)STAGDT(K)S T A/G/D I/T H L/E/V/L/D/N/R(M)     | 104.74 | 846.3654 | 1691.726 | -0.021  | -1.2  | 4.22 | 6932.8   | 6.91  | HUMAN | EP91E3  | Heat shock cognate 71 kDa protein                            |
| 3413 | dirMS_041712_NAR_30mM_minus2.12905.13137.2 | 2 | 1451 | 0.712E+05 | (R)YVAFAM(R)N/V I/A/M/V V/G/H(A)                 | 124.37 | 490.2513 | 979.503  | -0.076  | -7.8  | 8.72 | 58506.4  | 8.38  | HUMAN | P14618  | Pyruvate kinase isozymes M1/M2                               |
| 3414 | dirMS_041712_NAR_50mM_minus2.18357.18357.3 | 3 | 1451 | 0.462E+05 | (K)IAUEVL(K)A L I/E/L Q/P L/A I/E D A R(Q)       | 107.42 | 610.139  | 1801.033 | -0.059  | -3.3  | 5.4  | 53506.8  | 5.83  | HUMAN | P23381  | Tryptophan-tRNA ligase, cytoplasmic                          |
| 3415 | dirMS_041712_NAR_120mM_plus2.19590.19728.3 | 3 | 1451 | 0.873E+05 | (R)S5VYR(K)S V/L/V/L/V/L/S L/R(Q)                | 156.15 | 468.2345 | 1402.707 | -0.184  | -13.1 | 6.75 | 26700.7  | 5.95  | HUMAN | Q13085  | Acetyl-CoA carboxylase 1                                     |
| 3416 | dirMS_041712_NAR_30mM_plus2.12012.12012.2  | 2 | 1451 | 0.151E+05 | (K)SYPYTK(K)G I/D/V/L/V/L/V/P/V/R(A)             | 100.8  | 519.415  | 989.414  | 0.025   | 2.7   | 5.8  | 24193.8  | 6.83  | HUMAN | EP902   | Hepatitis-derived growth factor                              |
| 3417 | dirMS_041712_NAR_30mM_plus2.12242.12391.2  | 2 | 1451 | 0.843E+05 | (K)IGLSAA(K)S L/S/V/S N/L/V/L/S L/R(Q)           | 117.6  | 458.6203 | 915.526  | 0.055   | 6.6   | 6    | 53378.7  | 5.74  | HUMAN | Q15149  | Plectin                                                      |
| 3418 | dirMS_041712_NAR_30mM_plus2.19225.19754.2  | 2 | 1451 | 0.411E+06 | (K)ITGLG(K)I/T/L I/H/L/G/L/R(Q)                  | 156.62 | 450.2857 | 899.567  | -0.032  | -3.5  | 9.41 | 57391.2  | 6.29  | HUMAN | Q43175  | D-3-phosphoglycerate dehydrogenase                           |
| 3419 | dirMS_041712_NAR_30mM_plus2.6964.6964.2    | 2 | 1451 | 0.134E+05 | (K)ITGDSN(K)Q I/V/T/S I/S V/C/V A K(N)           | 91.15  | 660.7963 | 1320.589 | -0.006  | -2.7  | 8.5  | 65036    | 6.27  | HUMAN | EP9P13  | Phosphoribosylaminimidazolecarboxamide formyltransferase     |
| 3420 | dirMS_041712_NAR_30mM_plus2.7904.7938.3    | 3 | 1451 | 1.108E+05 | (K)SVAAGG(K)S V/L/S I/G/V/D/V/E N/H N S R(Q)     | 99.43  | 522.2648 | 1064.972 | -0.004  | 5.4   | 6.11 | 24579.8  | 10.91 | HUMAN | P16401  | Myosin-V                                                     |
| 3421 | dirMS_041712_NAR_30mM_minus2.18575.18575.2 | 2 | 145  | 0.387E+05 | (R)IADGVE(R)A I(D)G/Q/V/A/A/R(V)                 | 154.83 | 710.3759 | 1415.748 | -0.003  | -2.1  | 4.53 | 43773.3  | 5.26  | HUMAN | FBV29   | Keratin, type I cytoskeletal 18                              |
| 3422 | dirMS_041712_NAR_40mM_plus2.8727.8820.3    | 3 | 145  | 1.233E+05 | (R)JVLNAN(R)I V A/L/N/D P/D A/R L R A V/A E/L(Q) | 134.3  | 603.9966 | 1809.97  | -0.047  | 2.6   | 4.23 | 23837.5  | 11.6  | HUMAN | B4E068  | Phosphoglucomutase-2                                         |
| 3423 | dirMS_041712_NAR_50mM_minus2.13258.13258.3 | 3 | 145  | 0.261E+05 | (R)KTHHAV(K)M V T H A V V/P/T/V/P/V/D A/Q(Q)     | 143.18 | 629.9954 | 1887.971 | 0.005   | 0.3   | 6.71 | 72445.7  | 5.07  | HUMAN | P11021  | 78 kDa glucose-regulated protein                             |
| 3424 | dirMS_041712_NAR_30mM_plus2.7898.7898.3    | 3 | 145  | 1.150E+05 | (K)TAVDE(K)T A/V/C/D/P/P/P G/D A(Q)              | 111.93 | 442.9126 | 1326.72  | 0.014   | 2.6   | 8.41 | 50199.4  | 4.75  | HUMAN | AKN022  | Tubulin beta-3 chain-like protein LOC206334                  |
| 3425 | dirMS_041712_NAR_60mM_plus2.15988.16061.3  | 3 | 145  | 0.582E+05 | (R)S5VYR(K)S V/L/V/L/V/P/V/R(A)                  | 159.5  | 478.2888 | 1433.851 | -0.009  | -1.1  | 9.99 | 25048.2  | 6.91  | HUMAN | EP91E3  | Norviodazole-5                                               |
| 3426 | dirMS_041712_NAR_60mM_plus2.16939.16939.3  | 3 | 145  | 1.224E+05 | (R)KIGSEG(K)R F G F S G L/W/I/E I/N N P/T V I(A) | 153.83 | 649.986  | 1947.981 | -0.002  | 0.1   | 4.79 | 23020.5  | 4.53  | HUMAN | AKR80G  | Hepatitis-derived growth factor                              |
| 3427 | dirMS_041712_NAR_60mM_minus2.18252.18252.3 | 3 | 145  | 1.137E+05 | (R)S5LEUT(R)S E I/E L/T V/G L/E Q V/R(S)         | 163.05 | 538.9724 | 1614.906 | -0.035  | -2.1  | 4.78 | 53778.5  | 5.74  | HUMAN | Q15149  | Plectin                                                      |
| 3428 | dirMS_041712_NAR_120mM_plus2.11500.12033.3 | 3 | 145  | 1.254E+06 | (R)PFGQEL(R)P/P/Q/V/L/D/L/R L(K)                 | 113.82 | 420.2353 | 1258.69  | 0.011   | 0.9   | 8.07 | 42230.8  | 4.77  | HUMAN | AKN28   | Putative tubulin beta-chain-like protein ENSP0000290377      |
| 3429 | dirMS_041712_NAR_30mM_plus2.9508.9681.3    | 3 | 145  | 1.192E+05 | (R)S5VYR(K)S V/L/V/L/V/P/V/R(A)                  | 107.8  | 521.0817 | 1048.973 | -0.007  | -6.0  | 6.07 | 13880.6  | 6.83  | HUMAN | EP902   | Guanine nucleotide-binding protein subunit beta-2-like 1     |
| 3430 | dirMS_041712_NAR_20mM_plus2.7047.7047.2    | 2 | 1449 | 0.477E+05 | (R)EYKAVI(K)Y A I/E/V/A/T/R(Q)                   | 117.9  | 593.2759 | 1169.551 | 15.9938 | 0.9   | 4.53 | 37296.3  | 5.3   | HUMAN | FBV064  | Keratin, type II cytoskeletal 8                              |
| 3431 | dirMS_041712_NAR_30mM_minus2.18953.19212.2 | 2 | 1449 | 0.954E+05 | (K)MSYVQ(K)M S/V/Y/Q/A M/W/K(Q)                  | 159.83 | 579.2789 | 1157.548 | 0.0023  | 2     | 8.34 | 266161   |       |       |         |                                                              |

|      |                                            |   |       |   |          |                                                          |        |          |          |         |       |      |          |             |        |                                                         |
|------|--------------------------------------------|---|-------|---|----------|----------------------------------------------------------|--------|----------|----------|---------|-------|------|----------|-------------|--------|---------------------------------------------------------|
| 3484 | dirMS_D41712_NAR_120mM_minus.13316.4       | 4 | 14.43 | 1 | 9.47E-05 | (K)SVHSY(K)S V S V P / L J N S K D P I D R I I)          | 127.18 | 466.7525 | 1863.992 | -0.0041 | -2.2  | 6.47 | 54227.4  | 5.96 HUMAN  | K4D09  | Acetyl-CoA carboxylase 1                                |
| 3485 | dirMS_D41712_NAR_120mM_minus.8377.8394.3   | 3 | 14.43 | 0 | 1.85E-05 | (K)FQCECC(K)K F I Q U / C P H S T D R V I)               | 99.98  | 517.2227 | 1549.652 | 0.0013  | 0.9   | 5.32 | 51260.6  | 5.39 HUMAN  | PE1978 | Heterogeneous nuclear ribonucleoprotein K               |
| 3486 | dirMS_D41712_NAR_120mM_minus.1247.1186.3   | 3 | 14.43 | 0 | 2.70E-05 | (R)TSGM(R)T L I S G / S V S V P / P K I)                 | 128.2  | 492.9311 | 1473.78  | -0.0001 | -0.5  | 5.64 | 2755.8   | 5.74 HUMAN  | PT2574 | Protein-protein 1 subunit delta                         |
| 3487 | dirMS_D41712_NAR_30mM_plus.16157.16157.2   | 2 | 14.43 | 0 | 1.21E-05 | (K)SFLLES(K)S E S / E L I S L A M Q / K I)               | 144.07 | 602.8166 | 1204.642 | -0.0172 | -14.3 | 4.53 | 152002.8 | 9.1 HUMAN   | FEV200 | Uncoupler non-coupled myosin-V                          |
| 3488 | dirMS_D41712_NAR_30mM_minus.19598.19598.2  | 2 | 14.43 | 0 | 2.54E-05 | (R)YLVAAV(R)Y L T / V A A V F / R I)                     | 162.82 | 520.2998 | 1039.953 | -0.0013 | -1.1  | 8.75 | 40069.4  | 4.83 HUMAN  | FEW191 | Tubulin beta chain                                      |
| 3489 | dirMS_D41712_NAR_40mM_plus.14320.14410.3   | 3 | 14.43 | 0 | 2.72E-05 | (R)DWTEU(R)R V I C T E / L U P L K / P G R V I)          | 166.85 | 580.3211 | 1738.952 | -0.0002 | -1.9  | 6.07 | 30659.7  | 9.02 HUMAN  | PI6152 | Carbonyl reductase [NADPH 1]                            |
| 3490 | dirMS_D41712_NAR_40mM_minus.8128.8128.3    | 3 | 14.43 | 1 | 3.38E-05 | (R)DQGLV(R)D G K L V S / S V S V P / P K I)              | 128.2  | 492.9311 | 1473.78  | -0.0005 | -0.5  | 5.64 | 2755.8   | 5.74 HUMAN  | FEW194 | Keratin, type II cytoskeletal 8                         |
| 3491 | dirMS_D41712_NAR_50mM_plus.16531.16578.3   | 3 | 14.43 | 1 | 1.60E-05 | (K)SVSSV(K)W V S / V L V S / V F / R K I)                | 162    | 551.6488 | 1652.937 | -0.0052 | -3.1  | 10   | 23493.8  | 5.45 HUMAN  | F8V13  | Myosin-10                                               |
| 3492 | dirMS_D41712_NAR_50mM_minus.19068.19068.3  | 3 | 14.43 | 1 | 1.34E-06 | (R)KEGGEL(R)K E G G E / P L N I I I / L A D V T R I)     | 187.5  | 621.6941 | 1863.07  | -0.0021 | -1.1  | 6.07 | 15252.2  | 5.82 HUMAN  | AN61W5 | Peroxiredoxin 2, isoform CRA_A                          |
| 3493 | dirMS_D41712_NAR_20mM_plus.10450.10450.2   | 2 | 14.43 | 0 | 1.88E-05 | M592mM (R)G m P m P m G / P m P m A / G E G I E R I M)   | 144.65 | 570.3568 | 1427.713 | 31.993  | 2.1   | 5.75 | 77799.7  | 9.09 HUMAN  | PS2272 | Heterogeneous nuclear ribonucleoprotein M               |
| 3494 | dirMS_D41712_NAR_30mM_plus.18567.18567.2   | 2 | 14.43 | 0 | 3.04E-05 | (R)SFPYRN(R)S F Y N / V N L / T L G G G H I K I)         | 150.97 | 735.8825 | 1470.759 | -0.0001 | -0.7  | 8.31 | 17630.6  | 11.62 HUMAN | IL3D05 | Profilin-1 (Fragment)                                   |
| 3495 | dirMS_D41712_NAR_60mM_plus.6203.6203.3     | 3 | 14.43 | 1 | 3.09E-05 | (R)KSCSTN(R)K S C S T / V T V L V / R K I)               | 91.08  | 533.2423 | 1611.771 | -0.0048 | -1.1  | 4.49 | 13871.4  | 9.21 HUMAN  | PT2573 | Wt5 protein: ATPase subunit G 1                         |
| 3496 | dirMS_D41712_NAR_120mM_minus.10031.10155.3 | 3 | 14.42 | 0 | 5.96E-05 | (R)HGESAR(R)G E S V A / W N I L E N / R I)               | 109.4  | 438.2008 | 1312.603 | 0.012   | 9.1   | 5.4  | 28917.5  | 6.68 HUMAN  | PI8669 | Phosphoglycerate mutase 1                               |
| 3497 | dirMS_D41712_NAR_20mM_minus.12054.12401.3  | 3 | 14.42 | 0 | 2.99E-06 | M313m (R)TVOGLS(R)T V O G L S / L E V D / D V S / R I R) | 170.78 | 508.2517 | 1506.747 | 15.9937 | -0.8  | 4.03 | 43773.3  | 5.26 HUMAN  | F8V219 | Keratin, type I cytoskeletal 18                         |
| 3498 | dirMS_D41712_NAR_50mM_plus.15925.15925.3   | 3 | 14.42 | 0 | 3.64E-05 | (K)LYGPHI(K)Y I G P P T N S F / P I H N H V A R I)       | 158.22 | 630.3221 | 1798.96  | -0.0081 | -4.5  | 8.75 | 60985.3  | 5.6 HUMAN   | OT7311 | Copine-3                                                |
| 3499 | dirMS_D41712_NAR_60mM_minus.5572.5572.3    | 3 | 14.42 | 1 | 1.12E-05 | (K)LAGSE(K)I A G / G L S V S L A R / K I)                | 87.08  | 401.1263 | 1201.633 | -0.0007 | -0.6  | 6.14 | 90004.9  | 5.14 HUMAN  | PS5072 | Transitional endoplasmic reticulum ATPase               |
| 3500 | dirMS_D41712_NAR_120mM_plus.11105.11105.3  | 3 | 14.42 | 0 | 1.04E-05 | (K)MVFVEV(K)N F Y V I E M / P E V A R I)                 | 111.43 | 454.2277 | 1360.664 | 0.0041  | 3     | 5.4  | 73202    | 9.19 HUMAN  | AN61W5 | Probable ATP-dependent RNA helicase DDX17               |
| 3501 | dirMS_D41712_NAR_30mM_plus.19395.19641.2   | 2 | 14.42 | 0 | 1.20E-06 | (R)JDFLEO(R)I D I F I L E / C G I K I)                   | 155.15 | 477.7808 | 1094.555 | -0.0007 | -0.7  | 4.37 | 61018.6  | 9.44 HUMAN  | B4DLW8 | Probable ATP-dependent RNA helicase DDX5                |
| 3502 | dirMS_D41712_NAR_30mM_plus.5590.5590.2     | 2 | 14.42 | 0 | 2.38E-05 | M154m (R)M m D m D m G m G m Y m I m D m P m R I)        | 83.4   | 451.1814 | 869.364  | 31.9911 | 1.4   | 5.59 | 26419.2  | 5.1 HUMAN   | HOY9K7 | Splicing factor, proline- and glutamine-rich (Fragment) |
| 3503 | dirMS_D41712_NAR_40mM_plus.12152.12152.3   | 3 | 14.42 | 1 | 2.35E-05 | (R)YDGLR(R)Y D G L R / A N I D G G P G I S K I T)        | 137.17 | 570.9838 | 1710.939 | -0.0016 | -1    | 5.93 | 15338.4  | 5.51 HUMAN  | KZ1P1  | ATP synthase subunit alpha, mitochondrial (Fragment)    |
| 3504 | dirMS_D41712_NAR_40mM_plus.14370.14370.3   | 3 | 14.42 | 1 | 4.53E-05 | (R)NKEPTA(R)I N I E P T / A A A I A Y G L D K / Q I)     | 150.06 | 596.6671 | 1787.99  | -0.0034 | -1.9  | 6.07 | 17973    | 5.16 HUMAN  | EP96E5 | Heat shock cognate 71 kDa protein (Fragment)            |
| 3505 | dirMS_D41712_NAR_60mM_plus.6445.6463.2     | 2 | 14.42 | 1 | 3.50E-05 | (K)QVQVEV(K)Q V I Q V / Y K G E I T / R I)               | 92.37  | 590.8148 | 1180.621 | 0.0015  | 1.3   | 6.11 | 20069.4  | 6.74 HUMAN  | EP9K54 | Heat shock cognate 71 kDa protein (Fragment)            |
| 3506 | dirMS_D41712_NAR_30mM_minus.13245.13245.2  | 2 | 14.41 | 0 | 3.00E-05 | (K)SIVGWY(K)I T V I G I W T / A N M E R I I)             | 125.7  | 658.2918 | 1315.574 | 0.0028  | 2.1   | 5.72 | 47825.1  | 5.07 HUMAN  | Q8RFQ1 | Pulviate heat shock protein HSP 90-alpha A4             |
| 3507 | dirMS_D41712_NAR_30mM_plus.12823.12890.2   | 2 | 14.41 | 0 | 2.04E-05 | (R)JSTAGN(R)I H I I I G I A V L V I R I)                 | 157.57 | 516.8122 | 1032.62  | -0.0029 | -2.8  | 8.79 | 9731     | 5.19 HUMAN  | EP9C7W | Acetyl-CoA carboxylase 2                                |
| 3508 | dirMS_D41712_NAR_50mM_plus.12769.13106.3   | 3 | 14.41 | 0 | 4.37E-06 | M84m (K)YFHEK(K)Y F I E K I I T / A N D I D M E K I I)   | 141.65 | 659.6398 | 1360.911 | 15.9939 | 0.5   | 4.31 | 32616.5  | 5.18 HUMAN  | AN61W6 | Actin, alpha skeletal muscle                            |
| 3509 | dirMS_D41712_NAR_50mM_minus.12837.12882.3  | 3 | 14.41 | 1 | 3.84E-05 | (R)LSLEDG(R)I S L E D Y / G V L K T D E G I A Y R I G I) | 144.18 | 643.6651 | 1928.96  | -0.0063 | -3.2  | 4.32 | 22062.7  | 5.66 HUMAN  | PS3219 | Peroxiredoxin-2                                         |
| 3510 | dirMS_D41712_NAR_30mM_minus.16836.16836.3  | 3 | 14.41 | 0 | 4.56E-05 | (K)MILVTM(K)M I L V F V T / K P D V N Y I K I)           | 164.1  | 517.2991 | 1549.899 | -0.0161 | -10.4 | 8.5  | 206102.3 | 9.72 HUMAN  | EP9AV3 | Nascent polypeptide-associated complex subunit alpha    |
| 3511 | dirMS_D41712_NAR_30mM_minus.18163.18171.3  | 3 | 14.41 | 0 | 2.31E-05 | (R)KIFPDS(K)I L V I F V D S D L H D N D Q R I)           | 172.78 | 613.9745 | 1833.913 | -0.0004 | -2.2  | 4.41 | 51524.1  | 4.82 HUMAN  | F5H8I2 | Protein disulfide-isomerase                             |
| 3512 | dirMS_D41712_NAR_120mM_plus.6571.6571.3    | 3 | 14.41 | 1 | 1.74E-05 | (R)KILVY(K)I L V S L / L V S L / L V S L / R I)          | 108.37 | 481.1208 | 1288.907 | -0.001  | -1.2  | 6.11 | 2208.9   | 5.26 HUMAN  | F8V218 | Keratin, type I cytoskeletal 18                         |
| 3513 | dirMS_D41712_NAR_30mM_plus.20716.20716.2   | 2 | 14.41 | 0 | 8.74E-05 | (R)ITVLOS(R)I T V L O S / L V D L D S M R I)             | 162.18 | 753.8786 | 1505.747 | -0.0005 | -0.3  | 4.03 | 43773.3  | 5.26 HUMAN  | F8V219 | Keratin, type I cytoskeletal 18                         |
| 3514 | dirMS_D41712_NAR_30mM_plus.6410.6410.2     | 2 | 14.41 | 0 | 2.52E-05 | (K)GQGLQV(K)G E G / G I G / P A E R I A I)               | 95.53  | 507.2537 | 1013.501 | -0.0009 | -0.5  | 4.93 | 96306.4  | 6.41 HUMAN  | PI3639 | Elongation factor 2                                     |
| 3515 | dirMS_D41712_NAR_30mM_plus.7553.7553.2     | 2 | 14.41 | 0 | 2.40E-05 | (R)VLNAPR(R)V L I A N I P / G S Q V A R I)               | 93.82  | 613.3363 | 1225.665 | 0.0002  | 0.1   | 9.72 | 16598.6  | 5.48 HUMAN  | JQ3H48 | Importin subunit beta-1 (Fragment)                      |
| 3516 | dirMS_D41712_NAR_30mM_minus.10748.11012.3  | 3 | 14.41 | 0 | 3.85E-05 | (R)YDGLR(R)Y D G L R / A N I D G G P G I S K I T)        | 137.17 | 570.9838 | 1710.939 | -0.0016 | -1    | 5.93 | 15338.4  | 5.51 HUMAN  | KZ1P1  | ATP synthase subunit alpha, mitochondrial (Fragment)    |
| 3517 | dirMS_D41712_NAR_40mM_plus.11390.11390.3   | 3 | 14.41 | 0 | 1.21E-05 | (R)KEAGEK(R)E A E G L X P E E I I T V I G P V Q K I)     | 132.8  | 651.6782 | 1953.017 | 0.0025  | 1.3   | 4.32 | 102821.4 | 6.72 HUMAN  | PS3618 | Coatomer subunit beta                                   |
| 3518 | dirMS_D41712_NAR_40mM_plus.11636.11636.3   | 3 | 14.41 | 1 | 2.52E-05 | (R)RJVAPR(R)R V I A P G K G I A A D E S T S I A K I R)   | 135.27 | 633.3568 | 1898.059 | -0.0035 | -1.8  | 6.07 | 30711.4  | 7.15 HUMAN  | H8P858 | Fructose-bisphosphate aldolase A (Fragment)             |
| 3519 | dirMS_D41712_NAR_50mM_plus.7506.7647.3     | 3 | 14.41 | 1 | 3.52E-05 | (R)VVADV(R)R V I A S D K E T / E Y L R I)                | 105.87 | 470.5836 | 1409.727 | 0.0092  | 6.5   | 4.68 | 14478.1  | 9.37 HUMAN  | C9YD09 | 60S ribosomal protein L22-like 1                        |
| 3520 | dirMS_D41712_NAR_30mM_plus.17857.17894.3   | 3 | 14.41 | 1 | 3.70E-05 | (R)VVQDA(R)R V V D I A / V S L K G D L G A R I)          | 150.23 | 523.9678 | 1569.896 | -0.007  | -4.5  | 5.93 | 26948.2  | 7.99 HUMAN  | C3D521 | Creatine kinase U-type, mitochondrial (Fragment)        |
| 3521 | dirMS_D41712_NAR_50mM_plus.20098.20118.3   | 3 | 14.41 | 1 | 3.34E-05 | (K)SDFGK(R)S F D G K / P R E G V I A L I I L I S E R I)  | 165.02 | 590.6485 | 1769.939 | -0.0017 | -4.7  | 4.41 | 7898     | 11.1 HUMAN  | PE2857 | 45S ribosomal protein S28                               |
| 3522 | dirMS_D41712_NAR_40mM_minus.14843.14843.3  | 3 | 14.4  | 1 | 1.22E-06 | M161m (R)ELKALL(R)E L A / L I G m D / P A E K D V E K I) | 171.37 | 634.338  | 1884.999 | 16.0008 | 3.1   | 4.18 | 25148.6  | 6 HUMAN     | P3D041 | Peroxiredoxin-6                                         |
| 3523 | dirMS_D41712_NAR_60mM_minus.7760.7838.3    | 3 | 14.4  | 1 | 4.17E-05 | (K)IGTVEV(K)K G T V E G V E / P A D N K I)               | 103.35 | 464.5665 | 1391.68  | 0.0048  | 3.5   | 4.68 | 13286.2  | 9.99 HUMAN  | HY01A2 | Signal recognition particle 14 kDa protein              |
| 3524 | dirMS_D41712_NAR_120mM_plus.19040.19049.4  | 4 | 14.4  | 0 | 9.03E-05 | (R)PVPPEP(R)P V P P E I A / V I V H I T R I)             | 153.55 | 458.7454 | 1831.97  | -0.0103 | -5.6  | 5.28 | 27043.5  | 6.34 HUMAN  | C3H9H9 | ATP-binding cassette sub-family F member 2 (Fragment)   |
| 3525 | dirMS_D41712_NAR_120mM_plus.12106.12106.3  | 3 | 14.4  | 0 | 1.16E-05 | (R)YDGLR(R)Y D G L R / A N I D G G P G I S K I T)        | 137.17 | 570.9838 | 1710.939 | -0.0016 | -1    | 5.93 | 15338.4  | 5.51 HUMAN  | KZ1P1  | ATP synthase subunit alpha, mitochondrial (Fragment)    |
| 3526 | dirMS_D41712_NAR_120mM_plus.7624.7624.2    | 2 | 14.4  | 1 | 1.19E-06 | (R)ADYDR(R)A Q D Y D E / A M R I)                        | 135.23 | 547.2874 | 1093.564 | -0.0039 | -3.5  | 6.11 | 43773.3  | 5.26 HUMAN  | F8V219 | Keratin, type I cytoskeletal 18                         |
| 3527 | dirMS_D41712_NAR_120mM_plus.9979.10174.2   | 2 | 14.4  | 1 | 4.61E-05 | (R)YHIEGR(R)Y H I I I G I I G D I G R I)                 | 105.95 | 546.9731 | 1092.58  | -0.0007 | -0.6  | 5.32 | 47371.6  | 4.89 HUMAN  | EP9C7C | Heterogeneous nuclear ribonucleoprotein H               |
| 3528 | dirMS_D41712_NAR_20mM_plus.18821.18821.2   | 2 | 14.4  | 0 | 2.84E-05 | (K)LAVEAL(K)A V E A L I S / A D G L A R I)               | 200.05 | 793.9124 | 1586.838 | -0.0029 | -1.8  | 4.03 | 24286.7  | 5.93 HUMAN  | G3V4N7 | Creatine kinase B-type (Fragment)                       |
| 3529 | dirMS_D41712_NAR_30mM_plus.10509.10547.2   | 2 | 14.4  | 0 | 3.85E-05 | (R)DQGLV(R)D G K L V S / S V S V P / P K I)              | 109.02 | 507.2274 | 1013.432 | -0.0016 | -1.5  | 4.21 | 45763.5  | 6.03 HUMAN  | Q9H2C5 | Nuclear receptor coactivator 5                          |
| 3530 | dirMS_D41712_NAR_30mM_plus.17911.18212.2   | 2 | 14.4  | 0 | 5.51E-05 | (K)SDFGSK(R)S F I G L I P M / R I)                       | 147.78 | 467.2628 | 933.515  | 0.0031  | 3.3   | 9.47 | 80685.1  | 7.31 HUMAN  | PS3615 | Propionyl-CoA carboxylase alpha chain, mitochondrial    |
| 3531 | dirMS_D41712_NAR_40mM_plus.12832.12832.3   | 3 | 14.4  | 1 | 4.30E-05 | (R)YLVLEV(R)R Y L E L A / V S I T A N K T P C D G R I S) | 142.67 | 663.0201 | 1987.028 | 0.018   | 9.1   | 6.4  | 45186.1  | 9.89 HUMAN  | B4DLV4 | Serine hydroxymethyltransferase                         |
| 3532 | dirMS_D41712_NAR_40mM_plus.7767.7767.2     | 2 | 14.4  | 0 | 8.63E-04 | (R)MGQGV(R)F G Q I G G / G P V I G G Q G P R I)          | 105.47 | 671.3388 | 1341.666 | 0.0005  | 0.4   | 9.75 | 76262.2  | 9.53 HUMAN  | P23246 | Splicing factor, proline- and glutamine-rich            |
| 3533 | dirMS_D41712_NAR_60mM_plus.16565.16565.3   | 3 | 14.4  | 1 | 3.69E-05 | (R)FKNSDN(R)K N I S F / P I A T G C K I)                 | 124.85 | 532.2733 | 1594.808 | -0.0026 | -1.7  | 10   | 10471.9  | 5.4 HUMAN   | AZ3A87 | 45S ribosomal protein S6                                |
| 3534 | dirMS_D41712_NAR_120mM_minus.4529.4529.2   | 2 | 14.43 | 0 | 7.49E-05 | (R)HSDGN(R)H S D G N / G I N V C I G Q K I)              | 72.97  | 515.2423 | 1022.478 | 0.0009  | 0.9   | 6.3  | 7        |             |        |                                                         |

|      |                                            |   |       |   |          |                                                       |        |          |          |         |       |      |          |       |       |        |                                                               |
|------|--------------------------------------------|---|-------|---|----------|-------------------------------------------------------|--------|----------|----------|---------|-------|------|----------|-------|-------|--------|---------------------------------------------------------------|
| 3599 | dirMS_041712_NAR_50mM_plus2.18670.18800.3  | 3 | 14.33 | 1 | 5.80E-05 | (R)YLTAET(R)V/LI/TAE/ET/D T Q/N/V N L R(E)            | 166.65 | 614.662  | 1841.964 | 0.0071  | 3.8   | 4.68 | 65763.5  | 9.81  | HUMAN | QBHC05 | Nuclear receptor coactivator 5                                |
| 3594 | dirMS_041712_NAR_50mM_plus2.6067.6146.3    | 3 | 14.33 | 0 | 1.85E-05 | (R)IATPQT(R)IA/T/A P/Q/I Q/V/N/P F M R(E)             | 96.3   | 475.2418 | 1423.711 | -0.0002 | -0.1  | 9.8  | 21984.1  | 4.91  | HUMAN | EPBQ03 | Elongation factor 1-delta                                     |
| 3599 | dirMS_041712_NAR_50mM_plus2.1908.9308.3    | 0 | 14.33 | 0 | 1.31E-05 | (R)AETLVA(R)I/V/LI/TAE/ET/D T Q/N/V N L R(E)          | 143.47 | 452.2689 | 1355.783 | -0.0029 | -0.5  | 8.75 | 44235    | 9.81  | HUMAN | Q29912 | Customer submit gamma-2                                       |
| 3596 | dirMS_041712_NAR_120mM_plus2.1857.6205.4   | 4 | 14.32 | 0 | 1.57E-06 | (R)KASPT(R)KSA A K/P T K P A A Q/S(V)S/P/A/E/G V R(N) | 116.33 | 498.2724 | 1991.092 | -0.0042 | -2.1  | 8.31 | 54214.9  | 5.66  | HUMAN | CJ1839 | Caldesin (Fragment)                                           |
| 3597 | dirMS_041712_NAR_120mM_plus.5446.5446.3    | 3 | 14.32 | 0 | 1.24E-05 | (R)YDTEE(R)V/D T O/H/G S Q G A R(F)                   | 82.93  | 445.2092 | 1333.613 | -0.0071 | -0.1  | 5.32 | 63314.4  | 7.9   | HUMAN | BX301C | Protein transport protein Sec23A                              |
| 3598 | dirMS_041712_NAR_30mM_plus2.163331.16333.2 | 2 | 14.32 | 0 | 1.29E-05 | (R)SLSDm(R)S L/D/m(D)S/I/A V/E V K(A)                 | 142    | 668.8368 | 1320.671 | 15.9948 | -0.1  | 4.03 | 37296.3  | 5.3   | HUMAN | FVBU64 | Keratin, type II cytoskeletal 8                               |
| 3599 | dirMS_041712_NAR_50mM_plus2.14894.14894.3  | 0 | 14.32 | 0 | 4.07E-05 | (R)KWGLD(R)V/LI/TAE/ET/D T Q/N/V N L R(E)             | 116.85 | 498.2294 | 1979.451 | -0.0002 | -0.2  | 4.53 | 37296.3  | 5.3   | HUMAN | FVBU64 | Keratin, type II cytoskeletal 8                               |
| 3600 | dirMS_041712_NAR_60mM_plus2.16393.16393.3  | 3 | 14.32 | 0 | 2.04E-05 | (R)HDPST(R)H D P T S E/M/L Q/V L/N R(I)               | 150.92 | 486.6051 | 1493.796 | 0.0049  | 3.3   | 5.32 | 13566.4  | 5.3   | HUMAN | FV28   | Serine/threonine-protein kinase D1 (Fragment)                 |
| 3601 | dirMS_041712_NAR_120mM_plus.21623.21623.4  | 4 | 14.32 | 1 | 2.53E-05 | (R)KVDHIA(R)K V(D) V I/A/D/A/V/A S/T/Q/P/K P(S)       | 166.88 | 477.5186 | 1907.064 | -0.0111 | -5.8  | 8.43 | 23634.7  | 4.93  | HUMAN | BADWCT | Hydroxysteroid dehydrogenase-like D1 (Fragment)               |
| 3602 | dirMS_041712_NAR_20mM_plus.12284.12568.2   | 2 | 14.32 | 0 | 1.98E-05 | (R)GVICEA(R) V I/E I/V/C/A/T/P G R(L)                 | 106.67 | 586.8084 | 1172.609 | 0.0033  | 0.3   | 6    | 61018.6  | 9.44  | HUMAN | B4DLW8 | Probable ATP-dependent RNA helicase DDX5                      |
| 3603 | dirMS_041712_NAR_30mM_plus2.10341.10206.2  | 2 | 14.32 | 0 | 9.85E-05 | (R)FAGZML(R)F/A/I/Q/L/M/L/E/V R(K)                    | 158.48 | 433.7317 | 866.444  | 0.0121  | 13.9  | 6    | 45578.2  | 7.83  | HUMAN | B4D1C2 | Isostrate dehydrogenase (NADP)                                |
| 3604 | dirMS_041712_NAR_30mM_plus2.16785.1746.2   | 2 | 14.32 | 0 | 2.84E-05 | (R)ISDASD(R)S I/D/S/A/D/L V/L/V S/G S(K)L             | 140.7  | 574.8424 | 1347.609 | -0.0026 | -1.9  | 5.95 | 24934.7  | 4.5   | HUMAN | P24634 | Elongation factor 1-beta                                      |
| 3605 | dirMS_041712_NAR_40mM_plus2.10247.10247.2  | 2 | 14.32 | 0 | 6.93E-04 | (R)YVQLQL(R) Y/V/L/E/L/M/N/V K(L)                     | 125.03 | 577.2823 | 1155.556 | 0.0015  | 1.3   | 4.53 | 56607.4  | 5.37  | HUMAN | FVBU64 | Keratin, type II cytoskeletal 8                               |
| 3606 | dirMS_041712_NAR_40mM_plus.12281.12281.3   | 3 | 14.32 | 0 | 3.63E-04 | (R)VLVTEE(R)VL/TVE/E M G H V E/G D A I A R(L)         | 138.75 | 551.6493 | 1952.938 | -0.0049 | -2.5  | 4.17 | 40874    | 5.06  | HUMAN | EP9C9  | Farnesyl pyrophosphate synthase                               |
| 3607 | dirMS_041712_NAR_40mM_plus2.14642.14642.3  | 3 | 14.32 | 0 | 5.34E-05 | (R)KALTCF(R)K A/V/L I/T/C/P F I/P P K P(K)            | 153.53 | 537.6381 | 1610.898 | 0.0023  | 1.2   | 6.09 | 49982    | 5.86  | HUMAN | B4D7D8 | T-complex protein 1 subunit epsilon                           |
| 3608 | dirMS_041712_NAR_50mM_plus2.19664.19664.3  | 3 | 14.31 | 1 | 1.34E-05 | (R)KFGGGL(R)K E G/L G/L M/H I/P L A A D V T R(I)      | 187.5  | 621.9641 | 1463.077 | -0.0021 | -1.1  | 6.07 | 15252.2  | 5.82  | HUMAN | ANFNWS | Peroxidoxin 2, isoform CRA_b                                  |
| 3609 | dirMS_041712_NAR_120mM_plus.5571.5571.3    | 3 | 14.31 | 1 | 7.62E-04 | (R)YGDNR(R)Y/G I/D/N R V G I/G S/G G Q/G G G R(I)     | 82.97  | 543.9055 | 1629.7   | 0.0019  | 1.2   | 6.07 | 26157.9  | 4.57  | HUMAN | K7EL85 | TATA-binding protein-associated factor 2N (Fragment)          |
| 3610 | dirMS_041712_NAR_20mM_plus.6932.6932.2     | 2 | 14.31 | 0 | 1.59E-05 | (R)JTITAA(K)T T A/A/A/V/A S/T/Q/P/S S/P(S)            | 114.18 | 689.3492 | 1377.697 | -0.0057 | -4.2  | 9.41 | 72529.2  | 9.59  | HUMAN | BSME69 | Microtubule-associated protein 4 (Fragment)                   |
| 3611 | dirMS_041712_NAR_30mM_plus2.12023.12024.2  | 2 | 14.31 | 0 | 4.33E-05 | (R)LYLPPA(R)Y/LI/V I/P A S M/R(L)                     | 115.97 | 583.2879 | 1165.567 | 0.0015  | 1.3   | 5.83 | 16508.2  | 5.16  | HUMAN | JQ3X4  | Mitotic checkpoint protein Bub3                               |
| 3612 | dirMS_041712_NAR_30mM_plus2.7164.7386.2    | 2 | 14.31 | 0 | 1.70E-06 | (R)KTESEM(K)T E I/S I/E M/N R(N)                      | 92.85  | 490.2294 | 979.451  | 0.0002  | 0.2   | 4.53 | 37296.3  | 5.3   | HUMAN | FVBU64 | Keratin, type II cytoskeletal 8                               |
| 3613 | dirMS_041712_NAR_30mM_plus2.9922.9922.2    | 2 | 14.31 | 0 | 1.65E-06 | (R)KGSFSD(K)K S F/S/D T/G L/G/D/G K(M)                | 106    | 570.7598 | 1410.517 | -0.0044 | -3.9  | 4.21 | 108720.9 | 10.17 | HUMAN | O9Y2W1 | Thyroid hormone receptor-associated protein                   |
| 3614 | dirMS_041712_NAR_40mM_plus2.10695.10695.3  | 3 | 14.31 | 0 | 1.85E-05 | (R)KVGSLD(K)K V I/S/D V N G V H L P A G A V K(I)      | 128.15 | 530.9567 | 1590.86  | -0.0043 | -2.7  | 6.71 | 26233.5  | 10.95 | HUMAN | B4D5Q1 | Microtubule-associated protein                                |
| 3615 | dirMS_041712_NAR_60mM_plus.11896.11953.3   | 3 | 14.31 | 1 | 8.29E-05 | (R)KSYVEA(R)K S/V/S/A/D/M G/L R R(V)                  | 119.35 | 493.2446 | 1357.718 | 0.001   | 0.7   | 6.07 | 29131.2  | 4.66  | HUMAN | K7EM9D | Keratin, type I cytoskeletal 13 (Fragment)                    |
| 3616 | dirMS_041712_NAR_30mM_plus2.13678.13678.2  | 2 | 14.3  | 0 | 2.27E-05 | (R)KLYEAD(R)Y/LI/V E/A F P K(A)                       | 107.88 | 468.7599 | 936.504  | 0.0002  | 0.9   | 4.53 | 26626.6  | 5.68  | HUMAN | EP9PU0 | Epipkain                                                      |
| 3617 | dirMS_041712_NAR_60mM_plus2.11921.11921.3  | 3 | 14.3  | 1 | 3.03E-06 | (R)TEEM(R)T E I/M E K F/P L K R(I)                    | 126.87 | 499.5841 | 1480.772 | 15.9962 | 0.8   | 4.78 | 13588.1  | 4.66  | HUMAN | FVBU64 | Keratin, type II cytoskeletal 8 (Fragment)                    |
| 3618 | dirMS_041712_NAR_20mM_plus.10530.10530.2   | 2 | 14.3  | 0 | 1.07E-05 | (R)RIJVLG(R)R I A V L L I/G P P G A G K(G)            | 14.9   | 490.2292 | 979.593  | -0.0024 | -2.4  | 8.8  | 4460.2   | 8.14  | HUMAN | F8VP19 | Adenylate kinase 2, mitochondrial                             |
| 3619 | dirMS_041712_NAR_20mM_plus.17804.17938.2   | 2 | 14.3  | 0 | 4.16E-05 | (R)RIVATN(R)R I/V I/A/T/N L F G R(S)                  | 194.68 | 552.3309 | 1103.657 | -0.0026 | -2.4  | 9.75 | 40918.8  | 9.33  | HUMAN | B4DPS2 | HCG200538, isoform CRA_c                                      |
| 3620 | dirMS_041712_NAR_30mM_plus.8088.8176.2     | 2 | 14.3  | 0 | 2.02E-05 | (R)LEILAS(R)R L I/E L/A/S V/S/S K(I)                  | 125.87 | 502.7839 | 1040.562 | -0.0017 | -1.7  | 6    | 34221.3  | 6.44  | HUMAN | P19254 | Desmoplakin                                                   |
| 3621 | dirMS_041712_NAR_30mM_plus2.12299.12302.2  | 2 | 14.3  | 0 | 7.33E-05 | (R)RIVLVA(R)R I/V L/V A/V L/V S/V R(I)                | 111.52 | 603.3119 | 1311.615 | -0.0015 | -1.1  | 5.83 | 37731.1  | 5.37  | HUMAN | Q29912 | Keratin, type II cytoskeletal 18                              |
| 3622 | dirMS_041712_NAR_40mM_plus2.15016.15016.3  | 3 | 14.3  | 0 | 2.29E-05 | (R)RLEEDL(R)E V/D/V/L/A/K P Q V E G I Q K(S)          | 105.13 | 608.4749 | 1824.011 | -0.0012 | -0.6  | 4.32 | 156557.7 | 5.52  | HUMAN | Q6M24Q | Kinecin                                                       |
| 3623 | dirMS_041712_NAR_50mM_plus2.10124.10124.3  | 3 | 14.3  | 0 | 2.23E-05 | (R)RITVVAL(R)T I/T V/A/L A D/G P D N T G R(I)         | 92.73  | 512.9661 | 1713.888 | -0.0041 | -2.4  | 5.63 | 107550.2 | 5.34  | HUMAN | F4S888 | Alanine-tRNA ligase, cytoplasmic                              |
| 3624 | dirMS_041712_NAR_30mM_plus.7543.7543.2     | 2 | 14.3  | 0 | 7.47E-05 | (R)RIVTEE(R)R V I/T/E/E/N R K(A)                      | 120.97 | 618.8822 | 1236.647 | -0.0017 | -1.7  | 4.79 | 18901.8  | 11.65 | HUMAN | FH5152 | 60S ribosomal protein L13                                     |
| 3625 | dirMS_041712_NAR_50mM_plus2.13604.13604.3  | 3 | 14.3  | 0 | 2.11E-05 | (R)KGLS(R)K L/S/D T/G L/G/D/G K(M)                    | 106    | 570.7598 | 1410.517 | -0.0044 | -3.9  | 4.21 | 108720.9 | 10.17 | HUMAN | O9Y2W1 | Thyroid hormone receptor-associated protein                   |
| 3626 | dirMS_041712_NAR_120mM_plus.5835.5893.3    | 3 | 14.29 | 1 | 1.52E-06 | (R)KAJDAE(K)A A D/A/E/A/E/V/A S/L R R(I)              | 108.45 | 491.5865 | 1472.745 | -0.0002 | -0.2  | 4.68 | 33450.2  | 4.73  | HUMAN | 3KNE67 | Tropomyosin alpha-3 chain                                     |
| 3627 | dirMS_041712_NAR_30mM_plus2.10330.10350.2  | 2 | 14.29 | 0 | 6.12E-05 | (R)KJAVGD(K)K A V I/G Q/D T L R(S)                    | 110.63 | 486.7751 | 972.547  | -0.0043 | -4.5  | 5.88 | 72873.4  | 5.73  | HUMAN | Q6S555 | ATPase WRNIP1                                                 |
| 3628 | dirMS_041712_NAR_60mM_plus.6843.6887.2     | 2 | 14.29 | 1 | 5.64E-05 | (R)KSYVDC(R)R S I/S/D V I/G K K(S)                    | 94.35  | 455.257  | 909.504  | 0.0027  | 3     | 8.5  | 49012.3  | 4.9   | HUMAN | AMBU15 | Tubulin alpha-4A chain                                        |
| 3629 | dirMS_041712_NAR_120mM_plus2.11469.11469.2 | 2 | 14.28 | 0 | 7.48E-05 | (R)KISVAH(R)K S A/V/H I/Q/L S/E/L R(K)                | 116.68 | 663.3454 | 1325.881 | -0.0013 | -1    | 5.4  | 558007.1 | 5.44  | HUMAN | F8U019 | Epipkain                                                      |
| 3630 | dirMS_041712_NAR_60mM_plus2.17744.17746.3  | 3 | 14.28 | 1 | 4.16E-05 | (R)RILKAG(R)R I/L K A G R G/D I/T/D V L N R(I)        | 159.32 | 547.2829 | 1023.841 | 15.9911 | -1.1  | 4.43 | 47082.1  | 5.36  | HUMAN | EP9W30 | Actin, gamma-enteric smooth muscle                            |
| 3631 | dirMS_041712_NAR_120mM_plus.19626.19640.3  | 3 | 14.28 | 1 | 4.65E-05 | (R)KILNRD(K)R L V R D V/E I/V S L/L R(T)              | 156.13 | 510.6138 | 1529.828 | -0.0013 | -0.9  | 4.56 | 58214.7  | 5.25  | HUMAN | B4DEM7 | T-complex protein 1 subunit theta                             |
| 3632 | dirMS_041712_NAR_20mM_plus.17665.17665.3   | 3 | 14.28 | 0 | 1.23E-05 | (R)KJATDQ(K)K A T Q S N E V I/T/V/P/T E F S R(A)      | 193.2  | 636.0003 | 1905.992 | -0.0053 | -2.8  | 4.53 | 3888.3   | 5     | HUMAN | CJ3N8  | Heat shock protein beta-1                                     |
| 3633 | dirMS_041712_NAR_30mM_plus2.13463.13589.2  | 2 | 14.28 | 0 | 1.05E-06 | (R)KSYVST(R)K V I/S/G V I/P T L R(I)                  | 124.33 | 542.7882 | 1084.567 | 0.0018  | 1.6   | 8.5  | 55361.8  | 6.42  | HUMAN | G5E452 | Protein disulfide isomerase family A, member 3, isoform CRA_b |
| 3634 | dirMS_041712_NAR_30mM_plus2.16397.16397.3  | 3 | 14.28 | 0 | 2.76E-05 | (R)KJAVGQ(K)K A V I/G Q/D T L R(S)                    | 110.63 | 486.7751 | 972.547  | -0.0043 | -4.5  | 5.88 | 72873.4  | 5.73  | HUMAN | Q6S555 | ATPase WRNIP1                                                 |
| 3635 | dirMS_041712_NAR_30mM_plus2.19722.19722.2  | 2 | 14.28 | 0 | 3.60E-05 | (R)KSYNSM(K)S N V N N E V I/T/V/P/T E F S R(A)        | 156.88 | 667.8205 | 1334.641 | -0.0072 | -5.4  | 4.37 | 18511.8  | 5.62  | HUMAN | D6R070 | Heterogeneous nuclear ribonucleoprotein H (Fragment)          |
| 3636 | dirMS_041712_NAR_30mM_plus2.11717.11925.2  | 2 | 14.27 | 0 | 7.98E-05 | (R)RILPTE(R)R P L I/E I T A V R(R)                    | 117.87 | 481.7625 | 962.531  | -0.0128 | -13.3 | 6    | 266161   | 5.68  | HUMAN | EP9PU0 | Epipkain                                                      |
| 3637 | dirMS_041712_NAR_30mM_plus2.17195.17195.2  | 2 | 14.27 | 0 | 1.03E-05 | (R)RIGQGL(R)R G G I/L/V L/D L R(G)                    | 147.92 | 585.3352 | 1169.664 | -0.0006 | -0.5  | 5.84 | 34524.7  | 5.4   | HUMAN | AMBU37 | Protein SEC13 homolog                                         |
| 3638 | dirMS_041712_NAR_50mM_plus2.978.9783.3     | 3 | 14.27 | 0 | 3.34E-05 | (R)KJAVGQ(K)K A V I/G Q/D T L R(S)                    | 122.3  | 433.3025 | 1299.752 | -0.0049 | -3.8  | 5.73 | 31276.3  | 5.63  | HUMAN | CN2P9  | Acetylated cell death 6-interacting protein (Fragment)        |
| 3639 | dirMS_041712_NAR_60mM_plus2.17756.17756.3  | 3 | 14.27 | 1 | 2.33E-05 | (R)RIGLST(R)R I/G L/S/G L/S L/G E L/K N L S R(S)      | 154.92 | 543.6476 | 1628.933 | -0.0047 | -2.9  | 8.75 | 22294.4  | 5.26  | HUMAN | Q43399 | Tumor protein D54                                             |
| 3640 | dirMS_041712_NAR_120mM_plus.13268.13277.4  | 4 | 14.27 | 1 | 1.43E-06 | (R)KSVHSS(K)S V S V I/P L A/S K/D/P V/D R(I)          | 123.27 | 466.7533 | 1863.992 | -0.0009 | -0.5  | 6.47 | 54427.4  | 5.96  | HUMAN | KXDID9 | Acetyl-CoA carboxylase 1                                      |
| 3641 | dirMS_041712_NAR_20mM_plus.16613.16613.2   | 2 | 14.27 | 0 | 1.91E-05 | (R)KJAVIYA(K)Q I/V I/A/V N A/Q/E L Q R(M)             | 186.22 | 776.9419 | 1552.881 | -0.004  | -2.6  | 5.97 | 10728.1  | 9.15  | HUMAN | Q9Y514 | Mitochondrial import inner membrane translocase subunit Tim13 |
| 3642 | dirMS_041712_NAR_30mM_plus2.20862.21330.2  | 2 | 14.27 | 0 | 4.30E-06 | (R)KJVLFP(R)R I/V L I/P L D R(V)                      | 105.65 | 454.2621 | 977.504  | 0.0133  | 14.7  | 5.84 | 10803.5  | 9.82  | HUMAN | B8B228 | 10 kDa heat shock protein, mitochondrial                      |
| 3643 | dirMS_041712_NAR_30mM_plus2.8349.8349.2    | 2 | 14.27 | 0 | 4.11E-05 | (R)KJAVGQ(K)K A V I/G Q/D T L R(S)                    | 98     | 415.642  | 1023.511 | -0.0002 | -0.9  | 4.9  | 34994.4  | 5.62  | HUMAN | EP9W30 | Tubulin beta 3 chain-like protein LOC203834                   |
| 3644 | dirMS_041712_NAR_50mM_plus2.16929.16929.3  | 3 | 14.27 | 1 | 6.11E-05 | (R)KSMDFC(K)M S/W P/D I L N L V/W G P/K(V)            | 157.08 | 514.2847 | 1540.84  | -0.0008 | -0.5  | 5.96 | 629603.7 | 5.8   | HUMAN | Q05666 | Neuroblast differentiation-associated protein ANKRD1          |
| 3645 | dirMS_041712_NAR_60mM_plus.14394.14394.3   | 3 | 14.27 | 0 | 2.46E-05 | (R)KIVMAE(R)R V N I/A/E H V I/P R(I)                  | 132    | 420.9182 | 1260.742 | -0.0022 | -1.8  | 6.72 | 21920.7  | 5.63  | HUMAN | G3V256 | V-type proton ATPase subunit D                                |
| 3646 | dirMS_041712_NAR_60mM_plus2.20145.20183.3  | 3 | 14.27 | 0 | 4.68E-05 | (R)RDLKPE(R)R I/L K/P L E/V R(A)                      | 105.73 | 415.2483 | 1243.741 | -0.0105 | -8.5  | 6.07 | 30944.2  | 6.52  | HUMAN | BLQ2N1 | ATP-dependent RNA helicase DDX39A                             |
| 3647 | dirMS_041712_NAR_50mM_plus2.14541.14541.3  | 3 | 14.27 | 0 | 1.61E-05 | (R)KIVGNE(R)K V E I/V A/V I/E Y E I/F P(I)            | 109.1  | 561.2629 | 1087.992 | -0.0002 | -0.5  |      |          |       |       |        |                                                               |







|      |                                            |   |       |   |          |                                                |        |          |          |         |       |      |          |       |       |        |                                                              |
|------|--------------------------------------------|---|-------|---|----------|------------------------------------------------|--------|----------|----------|---------|-------|------|----------|-------|-------|--------|--------------------------------------------------------------|
| 3920 | dirMS_041712_NAR_30mM_minus11130.11130.2   | 2 | 14.01 | 0 | 6.40E-05 | (KIVAGGQ(KV)A)G(D)G/S V V(D)F(K)I              | 118.03 | 617.824  | 1234.643 | -0.0019 | -1.5  | 5.81 | 17.1274  | 10.05 | HUMAN | ABDU27 | Small ubiquitin-related modifier 3                           |
| 3921 | dirMS_041712_NAR_30mM_minus12825.12825.2   | 2 | 14.01 | 0 | 1.57E-05 | (KIGVAVR(K)G A)Y(V)Y(D)G/L(R)K                 | 153.6  | 555.7984 | 1110.594 | -0.0047 | -4.2  | 5.83 | 20989.9  | 5.92  | HUMAN | FBW8T8 | Acetyl-CoA carboxylase 2                                     |
| 3922 | dirMS_041712_NAR_30mM_minus12487.12487.3   | 3 | 14.01 | 0 | 1.87E-05 | (KIVGVH(V)K)V(V)Y(V)Y(D)G/L(R)K                | 139.0  | 467.3023 | 1200.293 | -0.0026 | -5.3  | 5.12 | 2905.6   | 6.03  | HUMAN | 6E9H   | 6-phosphofruktokinase, muscle type (Fragment)                |
| 3923 | dirMS_041712_NAR_60mM_minus10374.10374.3   | 3 | 14.01 | 0 | 5.97E-05 | (KIVAVR(K)Q)A(V)A/R P G G D T V(F)G(K)         | 117.88 | 472.9235 | 1416.759 | -0.0044 | -2.4  | 8.79 | 7323.5   | 9.4   | HUMAN | DM6K0C | Histidine triad nucleotide-binding protein 1                 |
| 3924 | dirMS_041712_NAR_60mM_minus14868.14868.3   | 3 | 14.01 | 1 | 2.72E-05 | (R)IKLQEEE(R)K L Q E E E(V)A(L)Q(D)M(D)R(A)    | 162.8  | 601.6438 | 1802.932 | -0.0148 | -8.2  | 4.41 | 35935.5  | 6.2   | HUMAN | QBWV0U | Coiled-coil domain-containing protein 50                     |
| 3925 | dirMS_041712_NAR_20mM_plus12477.12477.2    | 2 | 14.01 | 0 | 1.88E-05 | (R)GVGEIC(R)G V E(I)G/C A/T P G R(L)           | 158.73 | 586.8084 | 1127.609 | 0.0003  | 0.3   | 6    | 61018.6  | 9.44  | HUMAN | BD4LW8 | Probable ATP-dependent RNA helicase DXD5                     |
| 3926 | dirMS_041712_NAR_30mM_plus12059.12059.2    | 2 | 14.01 | 0 | 3.37E-05 | (R)IDVCLV(R)R V(L)Q(V)P(R)P                    | 110.58 | 574.7217 | 922.445  | 0.023   | 1.8   | 5.83 | 35328.8  | 4.91  | HUMAN | BD4D60 | Aspartinase-RNA ligase, cytoplasmic                          |
| 3927 | dirMS_041712_NAR_30mM_plus12495.12495.2    | 2 | 14.01 | 0 | 2.88E-04 | (R)IFELN(R)R F(L)I)A(L)D)M V(L)C(N)A           | 155.03 | 628.8226 | 1256.634 | 0.0036  | 2.8   | 5.83 | 22400.1  | 6.19  | HUMAN | F5H247 | Prefoldin subunit 3                                          |
| 3928 | dirMS_041712_NAR_30mM_plus2.20437.20437.2  | 2 | 14.01 | 0 | 6.07E-05 | (R)JFEELN(R)R(F)E(L)N)A(D)F(L)R(I)             | 161.07 | 637.1026 | 1253.616 | -0.0022 | -1.7  | 4.14 | 45508.6  | 5.5   | HUMAN | AKB7Q2 | Heat shock cognate 71 kDa protein                            |
| 3929 | dirMS_041712_NAR_50mM_plus2.9135.9156.3    | 3 | 14.01 | 1 | 3.70E-05 | (R)HTTGF(R)R(I)I)T)E F)A(E)A K E(K)            | 115.27 | 445.9079 | 1335.716 | -0.0063 | -4.7  | 4.79 | 55323    | 6.10  | HUMAN | BD4P18 | T-complex protein 1 subunit zeta                             |
| 3930 | dirMS_041712_NAR_20mM_minus.7839.7872.2    | 2 | 14    | 0 | 1.69E-05 | (K)IVYEA(K)S VIE I(A)A/E)A(S)A(R)D             | 128.45 | 538.2888 | 1075.563 | -0.0027 | -2.5  | 4.53 | 12131.5  | 11.14 | HUMAN | FG5K93 | Parathyrimin                                                 |
| 3931 | dirMS_041712_NAR_30mM_minus12205.12205.2   | 2 | 14    | 0 | 1.31E-05 | (R)ITLSEI(R)R V(L)Q(V)Y(V)Y(D)G/L(R)K          | 119.9  | 451.1202 | 1380.587 | 0.0021  | 0.8   | 5.74 | 21956.9  | 6.81  | HUMAN | BT25F4 | T-complex protein 1 subunit delta                            |
| 3932 | dirMS_041712_NAR_30mM_minus1.9028.19114.2  | 2 | 14    | 0 | 2.61E-05 | (K)SYLPEI(K)S Y E(L)I)D Q Q(V)I)Y(V)N E(R)F    | 158.88 | 895.9492 | 1790.892 | -0.0008 | -0.4  | 4.14 | 123097.1 | 5.83  | HUMAN | ASAE3E | POTE ankyrin domain family member F                          |
| 3933 | dirMS_041712_NAR_60mM_minus.8097.8097.3    | 3 | 14    | 1 | 4.11E-05 | (R)YLAEV(R)Y L)A E(V)A/T G E(N)R(A)            | 108.44 | 412.8902 | 1236.658 | -0.0022 | -1.8  | 6.14 | 28473.3  | 4.8   | HUMAN | PE1981 | 14-3-3 protein gamma                                         |
| 3934 | dirMS_041712_NAR_120mM_plus15261.15478.4   | 4 | 14    | 0 | 2.28E-06 | (K)HLEIPE(K)H L)E(V)M)P D H)P I)E L)R(Q)       | 133.9  | 446.4951 | 1782.95  | 0.0089  | 5     | 5.27 | 83605    | 4.97  | HUMAN | PD8238 | Heat shock protein HSP 90-beta                               |
| 3935 | dirMS_041712_NAR_20mM_plus11309.11309.3    | 3 | 14    | 0 | 1.53E-05 | (R)IGCTG(R)K C(V)I)G)G T)A)T)C A(K)K           | 150.28 | 583.5899 | 1174.787 | -0.0019 | -1.1  | 5.84 | 41827.5  | 7     | HUMAN | BT2749 | Phosphoglycerate kinase                                      |
| 3936 | dirMS_041712_NAR_20mM_plus.17612.17612.2   | 2 | 14    | 0 | 1.07E-05 | (R)ILFV(N)R(L) F)M)A)N)P)D)Y)T)E E)E L(R)K     | 192.97 | 938.4602 | 1859.921 | 0.0059  | 1.4   | 4    | 23729.5  | 9.89  | HUMAN | C9Z17  | Non-POU domain-containing octamer-binding protein (Fragment) |
| 3937 | dirMS_041712_NAR_30mM_plus2.11588.11588.2  | 2 | 14    | 0 | 3.91E-06 | (K)SNCNLL(K)S(C)N C(L)W(L)K(K)                 | 114.55 | 504.2556 | 1007.501 | 0.0027  | 2.7   | 8.47 | 47510.4  | 7.04  | HUMAN | PO6733 | Alpha-enolase                                                |
| 3938 | dirMS_041712_NAR_30mM_plus2.14019.14019.2  | 2 | 14    | 0 | 2.47E-05 | (K)SSGGP(K)S S)I)G)F)Y)M)A(C)R(N)              | 126.2  | 549.7552 | 1098.504 | -0.0006 | -0.5  | 8.47 | 45758.2  | 7.83  | HUMAN | BD4L12 | Isoacetyl dehydrogenase [NADP]                               |
| 3939 | dirMS_041712_NAR_30mM_plus2.16588.16277.2  | 2 | 14    | 0 | 3.46E-05 | (R)ISDQD(R)S(V)Q)M)D)I)G)E)Y)E)R(K)N           | 140.6  | 674.3475 | 1347.69  | -0.0026 | -1.9  | 5.55 | 24934.4  | 4.5   | HUMAN | PD2534 | Elongation factor 1-beta                                     |
| 3940 | dirMS_041712_NAR_30mM_plus2.7618.7618.2    | 2 | 14    | 0 | 1.73E-06 | (R)MGVPM(R)M)P)I)Y)M)D)R(M)                    | 94.18  | 403.1804 | 805.37   | 0.002   | 2.5   | 5.59 | 77995.7  | 9.09  | HUMAN | PS2272 | Heterogeneous nuclear ribonucleoprotein M                    |
| 3941 | dirMS_041712_NAR_40mM_plus2.14581.14581.3  | 3 | 14    | 0 | 4.87E-05 | (K)JIALTCR(K)A)I)U)T)C)F)E)P)P)K)P)K)I)T       | 153.47 | 537.6381 | 1610.898 | 0.0023  | 1.4   | 8.59 | 49982    | 5.86  | HUMAN | BD4YD8 | T-complex protein 1 subunit epsilon                          |
| 3942 | dirMS_041712_NAR_60mM_plus.16901.16901.3   | 3 | 14    | 0 | 8.89E-05 | (K)ITTSVA(K)R)T)T)I)Y)S)A)H)A)A)R(Q)           | 144.63 | 418.2478 | 1252.737 | -0.0003 | -6.7  | 9.44 | 34143.2  | 10.07 | HUMAN | BD4T23 | Protein FAM58A                                               |
| 3943 | dirMS_041712_NAR_30mM_minus12393.12393.2   | 2 | 13.99 | 0 | 5.64E-05 | (K)MGVPL(K)D)P)I)P)I)Y)A)R(Q)                  | 122.22 | 510.2598 | 1035.516 | -0.0037 | -3.2  | 4.37 | 18466.1  | 5.78  | HUMAN | H38503 | Pyruvate kinase (Fragment)                                   |
| 3944 | dirMS_041712_NAR_30mM_minus15615.15615.2   | 2 | 13.99 | 0 | 1.51E-05 | (K)MFTGV(K)M)T)I)G)E)Q)M)P)Y)R(A)              | 138.37 | 683.312  | 1373.631 | 0.0006  | 0.2   | 6.04 | 56186.7  | 6.07  | HUMAN | BD4U8R | T-complex protein 1 subunit gamma                            |
| 3945 | dirMS_041712_NAR_50mM_minus1.1474.11474.3  | 3 | 13.99 | 1 | 2.41E-04 | (R)IESDVP(R)S D)P)R)K)T)E)F)E)Y)T)K)I          | 133.62 | 584.3049 | 1750.874 | -0.0256 | -14.6 | 4.25 | 18909    | 6.21  | HUMAN | Q69698 | UFOS55 protein C19orf10                                      |
| 3946 | dirMS_041712_NAR_50mM_minus1.3446.13446.3  | 3 | 13.99 | 1 | 5.31E-05 | (K)LTEDK(K)I)U)T)E)D)K)A)D)O)Y)U)S)I)G)A)R)I)F | 144.8  | 595.9939 | 1785.97  | -0.0034 | -1.9  | 4.56 | 90316.8  | 5.52  | HUMAN | Q13263 | Transcription intermediary factor 1-beta                     |
| 3947 | dirMS_041712_NAR_60mM_minus.9631.9783.3    | 3 | 13.99 | 1 | 5.37E-05 | (R)ILMTEG(R)R)I)T)E)G)F)R)A)K)E)K)A)K)I)       | 113.88 | 445.91   | 1335.716 | 0       | 0     | 4.79 | 55323    | 6.02  | HUMAN | BD4P18 | T-complex protein 1 subunit zeta                             |
| 3948 | dirMS_041712_NAR_120mM_plus.8933.8974.2    | 2 | 13.99 | 0 | 8.36E-05 | (R)I)Y)E)A)E)A)S)I)G)E)Y)E)R(K)N)R)Y           | 90.1   | 601.831  | 1214.642 | 0.0001  | 0.1   | 6.03 | 61018.6  | 9.44  | HUMAN | BD4LW8 | Probable ATP-dependent RNA helicase DXD5                     |
| 3949 | dirMS_041712_NAR_30mM_plus2.17274.17274.2  | 2 | 13.99 | 0 | 7.74E-05 | (K)MLFEEL(K)M)E)I)Y)D)G)Y)E)R(K)N              | 145.37 | 469.2488 | 937.481  | 0.0092  | 9.8   | 4.53 | 19338.9  | 5.33  | HUMAN | E7F029 | RNA-splicing ligase RtcB homolog                             |
| 3950 | dirMS_041712_NAR_40mM_plus2.15431.15431.3  | 3 | 13.99 | 0 | 2.03E-05 | (K)GVYTIQ(K)G V)T)I)Y)G)P)A)P)G)K)P)C)K)I)     | 156.62 | 624.683  | 1872.041 | -0.0067 | -3.6  | 10   | 19339.6  | 9.22  | HUMAN | BAE3P0 | ATP-citrate synthase                                         |
| 3951 | dirMS_041712_NAR_50mM_plus2.19032.19154.3  | 3 | 13.99 | 1 | 1.72E-06 | (K)KLQML(K)L)I)Q)I)M)E)E)M)A)E)K)E)N)K)T       | 169.7  | 606.9845 | 1818.934 | 0.005   | 2.7   | 4.49 | 73202    | 9.19  | HUMAN | CJN0U5 | Probable ATP-dependent RNA helicase DXD17                    |
| 3952 | dirMS_041712_NAR_30mM_plus17893.17893.3    | 3 | 13.99 | 0 | 1.96E-05 | (R)IGGSR(K)S)E)G)E)Y)E)R(K)N)R)Y               | 61.83  | 256.9502 | 1170.855 | -0.0007 | -4.1  | 4.41 | 44039.7  | 6.28  | HUMAN | ADN039 | Proteasome activator complex subunit 1                       |
| 3953 | dirMS_041712_NAR_120mM_minus12144.12144.3  | 3 | 13.98 | 1 | 3.21E-05 | (R)ILYVTE(R)R)I)T)I)Y)E)Q)E)A)D)Y)O)K)N)K)I)   | 120.02 | 599.3185 | 1795.944 | -0.0027 | -1.8  | 5.71 | 13778.5  | 9.56  | HUMAN | K7EM18 | Eukaryotic translation initiation factor 1                   |
| 3954 | dirMS_041712_NAR_30mM_minus1.3638.13673.2  | 2 | 13.98 | 0 | 6.95E-05 | (R)I)P)LDQ(V)R)I)P)Q)D)Y)Y)N)K)I)              | 128    | 488.273  | 975.551  | -0.0122 | -12.5 | 5.83 | 50482.3  | 9.31  | HUMAN | PE8004 | Elongation factor 1-alpha                                    |
| 3955 | dirMS_041712_NAR_20mM_plus.10185.10185.2   | 2 | 13.98 | 0 | 2.01E-05 | (K)LSLDG(K)I)S)D)G)A)Y)A)V)I)K)I)              | 143.02 | 451.2712 | 910.535  | -0.002  | -0.2  | 5.84 | 61224.7  | 5.7   | HUMAN | P18089 | 60 kDa heat shock protein, mitochondrial                     |
| 3956 | dirMS_041712_NAR_30mM_plus.18846.18846.2   | 2 | 13.98 | 0 | 1.81E-05 | (K)ITAVETA(K)R)A)V)E)Y)A)A)I)L)I)R(Q)          | 200.4  | 593.825  | 1185.72  | -0.0024 | -2    | 5.66 | 56186.7  | 5.47  | HUMAN | BD4U8R | T-complex protein 1 subunit gamma                            |
| 3957 | dirMS_041712_NAR_30mM_plus2.6032.6032.2    | 2 | 13.98 | 0 | 1.66E-05 | (R)ISGSD(R)K)S)I)G)E)Y)E)R(K)N                 | 85.9   | 552.733  | 1104.459 | -0.0003 | -0.3  | 4.37 | 10478.9  | 5.71  | HUMAN | ADN039 | Proteasome activator complex subunit 1                       |
| 3958 | dirMS_041712_NAR_30mM_plus2.6607.6688.2    | 2 | 13.98 | 0 | 1.10E-06 | (K)SDIEME(K)S)I)D)E)M)E)K)I)                   | 90     | 426.1971 | 851.381  | 0.0054  | 6.4   | 4.14 | 26419.2  | 5.1   | HUMAN | HOYK97 | Splicing factor, proline- and glutamine-rich (Fragment)      |
| 3959 | dirMS_041712_NAR_30mM_plus2.9392.9392.2    | 2 | 13.98 | 0 | 6.90E-05 | (K)SIEAAA(K)S)I)E)A)A)E)A)E)A)S)A)K)D)         | 103.03 | 538.2855 | 1075.563 | 0.0007  | 0.7   | 4.53 | 12131.5  | 11.14 | HUMAN | FG5K93 | Parathyrimin                                                 |
| 3960 | dirMS_041712_NAR_50mM_plus2.21495.21495.3  | 3 | 13.98 | 0 | 8.95E-04 | (R)IGAEV(R)K)A)E)I)E)A)E)A)E)A)S)A)K)D)        | 183.4  | 535.3092 | 1603.917 | 0.0056  | 2.2   | 5.4  | 52378.2  | 6.32  | HUMAN | C9Z24  | 26S proteasome non-ATPase regulatory subunit 6               |
| 3961 | dirMS_041712_NAR_30mM_plus11782.11801.2    | 2 | 13.98 | 1 | 1.10E-06 | (K)SDIEMD(K)S)I)E)A)A)E)A)E)A)S)A)K)D)         | 103.03 | 538.2855 | 1075.563 | 0.0007  | 0.7   | 4.53 | 12131.5  | 11.14 | HUMAN | FG5K93 | Parathyrimin                                                 |
| 3962 | dirMS_041712_NAR_60mM_plus.9382.9382.2     | 2 | 13.98 | 0 | 1.98E-06 | (R)IGAEV(R)R)G)A)E)A)E)A)E)A)S)A)K)D)          | 103.03 | 538.2855 | 1075.563 | 0.0007  | 0.7   | 4.53 | 12131.5  | 11.14 | HUMAN | K7EM09 | Alpha-enolase                                                |
| 3963 | dirMS_041712_NAR_120mM_minus11726.11726.3  | 3 | 13.97 | 2 | 3.38E-05 | (R)ISGKYL(R)S)G)Y)D)I)F)K)S)P)D)I)P)S)Y)R)     | 117.87 | 609.6226 | 1826.855 | -0.0023 | -1.3  | 4.48 | 47510.4  | 7.04  | HUMAN | PO6733 | Alpha-enolase                                                |
| 3964 | dirMS_041712_NAR_30mM_minus2.14319.14319.2 | 2 | 13.97 | 0 | 7.55E-04 | (R)ITPFGA(K)R)P)Y)P)I)Y)S)A)I)F)S)G)E)K)       | 113.18 | 599.8093 | 1198.61  | 0.0011  | 0.9   | 8.26 | 48415.8  | 6.62  | HUMAN | B3KQ29 | Transducin-like enhancer protein 4                           |
| 3965 | dirMS_041712_NAR_30mM_plus14319.14319.2    | 2 | 13.97 | 0 | 1.37E-05 | (K)IVLQ(K)S)E)G)E)Y)E)R(K)N)R)Y                | 61.83  | 453.7871 | 945.567  | -0.0003 | -0.4  | 9.75 | 28732.3  | 6.28  | HUMAN | ADN039 | Proteasome activator complex subunit 1                       |
| 3966 | dirMS_041712_NAR_30mM_minus2.16427.16427.2 | 2 | 13.97 | 0 | 5.06E-05 | M185M (K)I)A)W)N)K)I)A)N)Y)M)Y)P)F)R)I)        | 142.53 | 580.3178 | 1143.634 | 19.94   | 0.8   | 9.75 | 42320.8  | 4.77  | HUMAN | AN6N28 | Putative tubulin beta chain-like protein ENSP0000290377      |
| 3967 | dirMS_041712_NAR_30mM_minus2.8899.8899.2   | 2 | 13.97 | 0 | 4.88E-05 | (K)SDPPV(S)K)S)D)P)V)N)S)Y)R(E)                | 102.7  | 461.7315 | 922.643  | -0.0071 | -7.7  | 5.55 | 96306.4  | 6.41  | HUMAN | P13639 | Elongation factor 2                                          |
| 3968 | dirMS_041712_NAR_60mM_minus.15261.15206.3  | 3 | 13.97 | 1 | 3.39E-05 | (K)KALQ(K)K)A)K)E)L)Q)I)Q)E)E)A)K)A)K)I)       | 144.37 | 506.9421 | 1518.816 | -0.0045 | -3    | 4.68 | 23903    | 4.94  | HUMAN | HYD0N1 | Plectin (Fragment)                                           |
| 3969 | dirMS_041712_NAR_60mM_plus.15721.15721.3   |   |       |   |          |                                                |        |          |          |         |       |      |          |       |       |        |                                                              |













|      |                                            |   |       |   |          |                                                             |                        |        |          |          |         |       |      |          |       |       |         |                                                              |
|------|--------------------------------------------|---|-------|---|----------|-------------------------------------------------------------|------------------------|--------|----------|----------|---------|-------|------|----------|-------|-------|---------|--------------------------------------------------------------|
| 4683 | dirMS_041712_NAR_30mM_minus1.9751.19812.2  | 2 | 13.39 | 0 | 1.11E+06 | (KJFLPDKR(K)F/LP/L F D/R)                                   |                        | 164.83 | 454.2604 | 907.5004 | 0.0099  | 10.9  | 5.84 | 10803.5  | 9.82  | HUMAN | BBZL28  | 10 kDa heat shock protein, mitochondrial                     |
| 4684 | dirMS_041712_NAR_50mM_minus1.0059.10059.3  | 3 | 13.39 | 0 | 5.64E+05 | M147m (K)LDNEAF(K)K(V)H(E)VA(H)H(V)G(T/P G R V)             | m.DnaE2a methionine    | 125.58 | 455.6267 | 1618.873 | 15.9922 | -1.7  | 6.75 | 20859.5  | 4.85  | HUMAN | JKS25   | Eukaryotic initiation factor 4A (Fragment)                   |
| 4685 | dirMS_041712_NAR_120mM_plus.8401.8401.3    | 3 | 13.39 | 0 | 3.40E+05 | (K)WYKSE(K)Y V E S E I V A L T R R                          |                        | 97.4   | 441.571  | 1451.151 | -0.0222 | -1.1  | 4.5  | 51647.2  | 7.82  | HUMAN | F5H147  | Protein disulfide-isomerase                                  |
| 4686 | dirMS_041712_NAR_20mM_plus.11556.11556.2   | 2 | 13.39 | 0 | 1.72E+05 | (K)GVLQK(V)K(V)Q(V)A(V)K(A)                                 |                        | 151.75 | 456.977  | 912.588  | 0.0004  | 0.5   | 8.72 | 61324.7  | 5.7   | HUMAN | P10809  | 60 kDa heat shock protein, mitochondrial                     |
| 4687 | dirMS_041712_NAR_20mM_plus.12394.12394.2   | 2 | 13.39 | 0 | 1.87E+05 | (K)GVEIC(A)R(G) V E I V C L T A P R G L R L                 | C.Carboxidomethylation | 158.58 | 586.8084 | 1172.609 | 0.0003  | 0.3   | 6    | 61018.6  | 9.44  | HUMAN | BADLW8  | Protein ATP-dependent RNA helicase DDX5                      |
| 4688 | dirMS_041712_NAR_20mM_plus.15936.15936.2   | 2 | 13.39 | 0 | 3.24E+05 | M81m (K)SPFPEE(K)S F Y P V E V S m V L T R M                |                        | 180.88 | 816.8988 | 1616.788 | 0.0027  | 4.8   | 4.53 | 17973    | 5.16  | HUMAN | EPH65   | Heat shock cognate 71 kDa protein (Fragment)                 |
| 4689 | dirMS_041712_NAR_20mM_plus.19049.19049.3   | 3 | 13.39 | 0 | 2.07E+05 | (K)ITLTSQ(K)T L E T E S A L I G P R L A I A F R K I         |                        | 107.05 | 457.251  | 1000.000 | -0.0003 | -0.1  | 4.5  | 21254.7  | 7.02  | HUMAN | EPH65   | Heat shock cognate 71 kDa protein (Fragment)                 |
| 4690 | dirMS_041712_NAR_20mM_plus.8616.8603.2     | 2 | 13.39 | 0 | 2.49E+05 | (K)YVPPPP(R)P(V) P P P I A R I A                            |                        | 130.63 | 472.2851 | 943.572  | -0.0094 | -1.0  | 9.72 | 32085.2  | 8.93  | HUMAN | 84D708  | Heterogeneous nuclear ribonucleoproteins C1/C2               |
| 4691 | dirMS_041712_NAR_30mM_plus.7310.7353.2     | 2 | 13.39 | 0 | 3.37E+05 | (K)DYAES(V)K(Y)A I E H S V G R K I                          |                        | 93.07  | 448.71   | 896.411  | 0.0019  | 2.1   | 4.37 | 65763.5  | 9.81  | HUMAN | QHC05   | Nuclear receptor coactivator 5                               |
| 4692 | dirMS_041712_NAR_40mM_plus.17470.17470.3   | 3 | 13.39 | 0 | 1.58E+05 | (R)YVALT(R)Y(V)A I T M G I F S P A I S R I G                |                        | 169.33 | 601.3376 | 1801.996 | 0.0023  | 1.3   | 8.73 | 24482.9  | 7.96  | HUMAN | B1A1A9  | Phosphoribosyl pyrophosphatase synthetase 1                  |
| 4693 | dirMS_041712_NAR_50mM_plus.2936.9956.3     | 3 | 13.39 | 1 | 3.03E+05 | (K)YGDSQ(K)C(V)C D Q D S G Q V F V V V Q N K I R G          | C.Carboxidomethylation | 119.55 | 555.947  | 1065.826 | -0.001  | -0.0  | 5.93 | 53323    | 6.02  | HUMAN | BADP08  | T-complex protein 1 subunit zeta                             |
| 4694 | dirMS_041712_NAR_60mM_plus.15292.15309.3   | 3 | 13.39 | 1 | 8.29E+04 | (K)KESRPF(K)K(V)E L V A L T R R                             |                        | 137.4  | 481.2992 | 1451.741 | -0.001  | -1.1  | 8.59 | 59149.6  | 9.74  | HUMAN | FTC103  | Peptidylarginine binding protein                             |
| 4695 | dirMS_041712_NAR_50mM_minus1.11845.11845.3 | 3 | 13.38 | 1 | 6.27E+06 | (K)KVPQ(K)K(V)P Q V S V T T I V I V E V S R I N             |                        | 136.32 | 547.3172 | 1639.938 | -0.0007 | -0.4  | 8.75 | 57571.3  | 6.9   | HUMAN | B7WNRO  | Serum albumin                                                |
| 4696 | dirMS_041712_NAR_50mM_minus1.15910.15910.3 | 3 | 13.38 | 1 | 8.21E+04 | (K)IDANA(K)K(A)N A K L S E V I E L A A V Q R I K            |                        | 158.97 | 543.6248 | 1628.86  | -0.0004 | -0.2  | 4.68 | 56607.4  | 5.37  | HUMAN | F8XBV4  | Keratin, type II cytoskeletal 8                              |
| 4697 | dirMS_041712_NAR_120mM_plus.21328.21447.3  | 3 | 13.38 | 1 | 3.11E+05 | (K)KIVSL(V)R(K) V E S L W P P R I K I                       |                        | 165.75 | 425.5799 | 1274.726 | -0.0004 | -0.3  | 8.75 | 14138.1  | 9.89  | HUMAN | C9NV2   | Protein BUD31 homolog                                        |
| 4698 | dirMS_041712_NAR_120mM_plus.9076.9365.2    | 2 | 13.38 | 0 | 4.13E+05 | (K)GIVFK(K)M V I V F I A Q R R I                            |                        | 101.58 | 485.2801 | 960.563  | -0.0013 | -0.3  | 9.75 | 21111.5  | 10.28 | HUMAN | BM5C09  | 40S ribosomal protein S7                                     |
| 4699 | dirMS_041712_NAR_30mM_plus.216261.16261.2  | 2 | 13.38 | 0 | 1.38E+06 | (R)IGGVDV(R)I G I V D E G A L L R I A                       |                        | 138.9  | 550.3082 | 1099.611 | -0.0015 | -1.3  | 4.37 | 57391.2  | 6.29  | HUMAN | 043175  | D-3-phosphoglycerate dehydrogenase                           |
| 4700 | dirMS_041712_NAR_40mM_plus.17466.17466.3   | 3 | 13.38 | 1 | 3.17E+05 | (K)IGISDV(K)I T G V I S D V V F A K N D V A A V D V R I R I |                        | 169.33 | 640.3451 | 1919.023 | -0.0025 | -1.3  | 4.43 | 76670.1  | 4.46  | HUMAN | P19338  | Nucleolin                                                    |
| 4701 | dirMS_041712_NAR_60mM_plus.16770.16770.3   | 3 | 13.38 | 0 | 2.63E+05 | (R)YDEALH(R)Y Q I E A L H I L Q S Q L L R E I               |                        | 144.15 | 509.964  | 1527.828 | -0.0004 | -2.9  | 6.75 | 47748.2  | 6.08  | HUMAN | 000231  | 26S proteasome non-ATPase regulatory subunit 11              |
| 4702 | dirMS_041712_NAR_120mM_minus.11368.11481.3 | 3 | 13.37 | 0 | 2.31E+05 | (R)IGFCPLP(R)F I C L Q P P H V S R I G                      | C.Carboxidomethylation | 146.42 | 410.8268 | 1230.551 | 0.0008  | 7.1   | 9.75 | 14931.8  | 4.99  | HUMAN | CV3461  | Creative kinase B-type (Fragment)                            |
| 4703 | dirMS_041712_NAR_20mM_minus.14886.14888.2  | 2 | 13.37 | 0 | 2.08E+06 | (K)EIDLVQ(K)E I I D V L V I D R I                           |                        | 240    | 543.3133 | 1085.62  | -0.0008 | -0.7  | 4.03 | 58642    | 4.95  | HUMAN | F5H5D3  | Tubulin alpha-1C chain                                       |
| 4704 | dirMS_041712_NAR_30mM_minus.16345.16345.2  | 2 | 13.37 | 0 | 1.94E+05 | (K)ACGNF(K)C A G C N A V F G P C E L R V                    | C.Carboxidomethylation | 112.53 | 697.3207 | 1393.635 | -0.001  | -0.7  | 6.05 | 37681.5  | 5.93  | HUMAN | D6R6F2  | Phosphoribosylaminimidazole carboxylase                      |
| 4705 | dirMS_041712_NAR_30mM_minus.19443.19443.2  | 2 | 13.37 | 0 | 2.19E+05 | (R)ILVATL(R)I L V I A T V L F R G R I                       |                        | 161.95 | 552.3309 | 1103.657 | -0.0026 | -2.4  | 9.75 | 40918.8  | 9.33  | HUMAN | BADP52  | HCG205G83, inorganic CRA_c                                   |
| 4706 | dirMS_041712_NAR_40mM_minus.5909.5909.2    | 2 | 13.37 | 0 | 1.30E+06 | (K)AGFAGC(K)A G F A G D V A P R I A                         |                        | 98.15  | 488.7279 | 976.448  | 0.0002  | 0.2   | 4.21 | 123997.1 | 5.83  | HUMAN | AS480   | POTE ankyrin domain family member F                          |
| 4707 | dirMS_041712_NAR_50mM_minus.12648.12673.3  | 3 | 13.37 | 1 | 3.98E+05 | (K)NTVLEL(K)M T I V E L V E K G K Q V Y R I C I             |                        | 104.63 | 520.3309 | 1076.976 | -0.0018 | -1.1  | 4.8  | 28515.9  | 5.48  | HUMAN | ETK905  | Filamin-B                                                    |
| 4708 | dirMS_041712_NAR_50mM_minus.13092.13092.3  | 3 | 13.37 | 1 | 2.73E+04 | (K)VVSSSS(K)M V I S S V I D V K E Y S A R L R I             |                        | 142.6  | 570.6413 | 1709.907 | -0.0025 | -1.5  | 6.04 | 29938.9  | 6.07  | HUMAN | HOYCD   | 26S protease regulatory subunit 10B (Fragment)               |
| 4709 | dirMS_041712_NAR_50mM_minus.13319.13319.3  | 3 | 13.37 | 0 | 3.99E+05 | (R)IEQISLR(I)E Q I S L P T N I T S V G L H N A I R S I      |                        | 143.55 | 613.3274 | 1837.977 | -0.009  | -4.9  | 6.85 | 128523.4 | 7.06  | HUMAN | B7ZL0U  | Protein transport protein Sec31A                             |
| 4710 | dirMS_041712_NAR_50mM_minus.9744.9744.3    | 3 | 13.37 | 0 | 2.51E+05 | (K)TSDVQ(K)T S V E D L N A P L N V R I                      |                        | 123.18 | 413.9205 | 1299.752 | -0.0049 | -3.8  | 5.73 | 13782.3  | 5.63  | HUMAN | C9ZV29  | Programmed cell death 6-interacting protein (Fragment)       |
| 4711 | dirMS_041712_NAR_60mM_minus.12212.12120.3  | 3 | 13.37 | 1 | 3.15E+05 | (K)YVYV(K)Y V I V A L E V G V K V I                         |                        | 127.1  | 481.1511 | 1451.741 | -0.001  | -1.1  | 4.68 | 15212.2  | 9.74  | HUMAN | FTC103  | Peptidylarginine binding protein                             |
| 4712 | dirMS_041712_NAR_60mM_minus.6159.6166.3    | 3 | 13.37 | 1 | 2.64E+05 | (K)EAE8(K)K U E I E A L K A E A D E S E R I G               |                        | 92.57  | 492.8981 | 1476.681 | -0.0015 | -1.1  | 4.14 | 31376.8  | 4.85  | HUMAN | B7Z956  | Tropomyosin alpha-1 chain                                    |
| 4713 | dirMS_041712_NAR_50mM_plus.11000.11000.2   | 2 | 13.37 | 0 | 1.32E+05 | (K)EITALAR(K)E I T I A I A V P S T M K I                    |                        | 148.15 | 581.3129 | 1161.618 | 0.0001  | 0.1   | 6.1  | 32616.5  | 5.18  | HUMAN | AN6L76  | Actin, alpha skeletal muscle                                 |
| 4714 | dirMS_041712_NAR_20mM_plus.11427.11427.3   | 3 | 13.37 | 1 | 3.29E+05 | (K)IVAVAC(K)Y A I V A I V A P T G D V G K C A G A L R I G   | C.Carboxidomethylation | 127.85 | 630.9984 | 1890.985 | -0.0048 | -2.5  | 8.56 | 45228.3  | 6.03  | HUMAN | F5H737  | Adenosylhomocysteinase                                       |
| 4715 | dirMS_041712_NAR_20mM_plus.1525.1525.3     | 3 | 13.37 | 1 | 4.32E+05 | (K)YVYV(K)Y V I V A L E V G V K V I                         |                        | 147.3  | 574.9253 | 1476.107 | -0.0001 | -0.3  | 4.78 | 23232.2  | 9.74  | HUMAN | FTC103  | Peptidylarginine binding protein                             |
| 4716 | dirMS_041712_NAR_60mM_plus.11861.12249.3   | 3 | 13.37 | 1 | 7.49E+06 | (R)YFQQAL(R)P P F G Q L I I N A V D L K R L I               |                        | 119.62 | 420.23   | 1258.69  | -0.0148 | -11.8 | 8.75 | 42320.8  | 4.77  | HUMAN | AN6N28  | Putative tubulin beta chain-like protein ENSP000029037       |
| 4717 | dirMS_041712_NAR_60mM_plus.11870.11870.3   | 3 | 13.37 | 1 | 1.71E+05 | M239m (R)IMS(M)K R I M S M E V D E D G L M V A V Q N K I N  | m.DnaE2a methionine    | 119.38 | 647.3021 | 1923.897 | 15.9945 | -0.2  | 4.68 | 40069.4  | 4.83  | HUMAN | E7EWR1  | Tubulin beta chain                                           |
| 4718 | dirMS_041712_NAR_120mM_minus.10924.11026.3 | 3 | 13.36 | 1 | 6.07E+05 | (R)YFNGE(R)Y F Y K N E G G T V A V E V I V E V I            |                        | 113.78 | 515.5834 | 1544.738 | -0.0023 | -1.5  | 6.14 | 39066    | 6.61  | HUMAN | AP6VW9  | Selenium binding protein 1 (Fragment)                        |
| 4719 | dirMS_041712_NAR_20mM_minus.13741.13741.2  | 2 | 13.36 | 0 | 3.90E+05 | (K)IGYGA(K)K G G V S A V S L E G K P I L R I                |                        | 108.65 | 670.8912 | 1340.778 | -0.0033 | -2.4  | 6    | 22956    | 8.8   | HUMAN | EPH25   | Colicin-1                                                    |
| 4720 | dirMS_041712_NAR_30mM_minus.14081.14029.2  | 2 | 13.36 | 0 | 5.90E+05 | (R)ISGQPK(R)E I L I L V N R I                               |                        | 130.73 | 503.7677 | 1086.532 | -0.0025 | -3.5  | 5.72 | 82516.1  | 5.94  | HUMAN | PTZ84   | Calpain-1 catalytic subunit                                  |
| 4721 | dirMS_041712_NAR_30mM_minus.15799.15799.2  | 2 | 13.36 | 0 | 2.84E+05 | (K)EGEALD(K)E G A V L A V S G L R I K                       |                        | 139.08 | 517.847  | 1030.553 | 0.0094  | 9.1   | 4.37 | 56522.6  | 6.66  | HUMAN | BADW73  | Phosphoenolpyruvate carboxylase (GTP), mitochondrial         |
| 4722 | dirMS_041712_NAR_30mM_minus.16076.16076.2  | 2 | 13.36 | 0 | 1.21E+05 | (K)ISELLEL(K)S I E I L I L I S A L Q I K                    |                        | 141.17 | 602.816  | 1204.642 | -0.0172 | -1.4  | 4.53 | 150202.8 | 9.1   | HUMAN | E7EWR20 | Unconventional myosin-V                                      |
| 4723 | dirMS_041712_NAR_40mM_minus.8165.8165.3    | 3 | 13.36 | 0 | 2.24E+05 | M35M (K)IAASDA(K)A A I S D I A M T E P V T H P P I R I L    | m.DnaE2a methionine    | 128.48 | 612.6484 | 1819.937 | 15.9936 | -0.7  | 5.32 | 12926.1  | 4.4   | HUMAN | E7EWR20 | 14-3-3 protein epsilon (Fragment)                            |
| 4724 | dirMS_041712_NAR_50mM_minus.13418.13418.3  | 3 | 13.36 | 1 | 3.41E+05 | (K)YVYV(K)Y V I V A L E V G V K V I                         |                        | 147.3  | 574.9253 | 1476.107 | -0.0001 | -0.3  | 4.78 | 23232.2  | 9.74  | HUMAN | FTC103  | Peptidylarginine binding protein                             |
| 4725 | dirMS_041712_NAR_60mM_minus.9769.9865.3    | 3 | 13.36 | 1 | 8.70E+05 | (K)IAASDA(K)Y A I S D I A M T E P V T H P P I R I L         |                        | 114.7  | 413.8839 | 1219.64  | -0.003  | -2.5  | 6.11 | 43773.3  | 5.26  | HUMAN | F8V219  | Keratin, type I cytoskeletal 18                              |
| 4726 | dirMS_041712_NAR_120mM_plus.8149.8149.2    | 2 | 13.36 | 0 | 4.29E+05 | (K)AGEVFR(K)A G E I V F I H M K I D                         |                        | 96.3   | 450.7531 | 900.494  | 0.0051  | 5.7   | 6.79 | 23729.5  | 9.89  | HUMAN | C9ZV29  | Non-POU domain-containing octamer-binding protein (Fragment) |
| 4727 | dirMS_041712_NAR_40mM_plus.17766.17767.3   | 3 | 13.36 | 1 | 1.96E+05 | (R)IKLSPSP(R)K V L I P S I F V P Y S A Q K R I              |                        | 170.73 | 530.671  | 1589.999 | -0.0004 | -0.3  | 10   | 34958.1  | 9.42  | HUMAN | Q15785  | Mitochondrial import receptor subunit TOM34                  |
| 4728 | dirMS_041712_NAR_50mM_plus.10806.10809.3   | 3 | 13.36 | 1 | 2.46E+05 | (K)GATVA(K)K T A V I A V D A P F R V E R I                  |                        | 120.07 | 445.5822 | 1334.731 | 0.0006  | 0.5   | 6.11 | 15252.2  | 5.82  | HUMAN | AN6N55  | Peroxiredoxin 2, isoform CRA_a                               |
| 4729 | dirMS_041712_NAR_50mM_plus.14758.14967.3   | 3 | 13.36 | 1 | 1.17E+04 | (K)YVMCCS(K)Y A V C C C L V S V G V P V P K I R I           | C.Carboxidomethylation | 144.47 | 615.6348 | 1844.886 | 0.0043  | 2.3   | 8.49 | 50706.6  | 5.68  | HUMAN | AN6N42  | Tubulin alpha chain-like 3                                   |
| 4730 | dirMS_041712_NAR_50mM_plus.5685.5685.3     | 3 | 13.36 | 1 | 1.06E+06 | (K)TAGPIS(K)T A G P V I A S A Q K P A D R I                 |                        | 91.9   | 475.5987 | 1424.786 | -0.0041 | -2.8  | 10   | 72529.2  | 9.59  | HUMAN | BM5E09  | Microtubule-associated protein 4 (Fragment)                  |
| 4731 | dirMS_041712_NAR_60mM_plus.12928.13025.3   | 3 | 13.36 | 0 | 6.26E+05 | (K)YFNGE(R)Y F Y K N E G G T V A V E V I V E V I            |                        | 124.52 | 570      |          |         |       |      |          |       |       |         |                                                              |



|      |                                            |   |       |   |          |                                                    |        |          |          |         |       |      |          |       |       |         |                                                                                             |
|------|--------------------------------------------|---|-------|---|----------|----------------------------------------------------|--------|----------|----------|---------|-------|------|----------|-------|-------|---------|---------------------------------------------------------------------------------------------|
| 4792 | dirMS_041712_NAR_60mM_plus.19303.19303.3   | 3 | 13.32 | 1 | 1.96E+05 | (RJAGEAG(R)A G/E)A/G K L E (V)A/M Q/E/L/R/A)       | 159.22 | 551.9525 | 1659.837 | 0.0059  | 3.6   | 4.49 | 54918.13 | 5.61  | HUMAN | Q9BR76  | Coronin-1B                                                                                  |
| 4793 | dirMS_041712_NAR_60mM_plus.7536.7572.13    | 3 | 13.32 | 0 | 1.38E+06 | M80M (R)ITCSH(R)T/T/C/S/N/H/Q/N I M (K)G           | 197.40 | 449.5594 | 1330.661 | 16.003  | 6.7   | 8.44 | 20931.1  | 10.28 | HUMAN | DR6N4A  | 60S ribosomal protein L9 (Fragment)                                                         |
| 4794 | dirMS_041712_NAR_20mM_plus.12556.12556.3   | 3 | 13.32 | 0 | 5.42E+05 | M73M (R)AVVVD(L)A/V/L/A/V/S/V/S/V/S/R/S)           | 171.05 | 591.3613 | 1601.85  | 15.992  | -1.8  | 4.03 | 121616.4 | 5.18  | HUMAN | ET6RM6  | Actin, cytoplasmic 1 (Fragment)                                                             |
| 4795 | dirMS_041712_NAR_20mM_minus.14710.1710     | 2 | 13.31 | 0 | 1.74E+05 | (K)ITVETAK(T)A/V/T/L/V/L/L I M (K)G                | 203.17 | 593.3613 | 1185.72  | -0.0408 | -4.1  | 5.66 | 56618.7  | 5.47  | HUMAN | BADU8R  | T-complex protein 1 subunit gamma                                                           |
| 4796 | dirMS_041712_NAR_30mM_minus.12110.12110.2  | 2 | 13.31 | 0 | 9.63E+05 | (K)SFLVDD(K)S I/L/V/D/Q/S (K)A)                    | 113.15 | 521.5700 | 1042.87  | 0.0058  | 5.5   | 5.55 | 258215.9 | 5.54  | HUMAN | FILAM1B | Filamin-B                                                                                   |
| 4797 | dirMS_041712_NAR_30mM_minus.16078.16078.2  | 2 | 13.31 | 0 | 2.17E+04 | (K)NVNLES(K)N/V/L/E/S/R(A)                         | 140.85 | 497.265  | 993.536  | -0.0136 | -13.7 | 5.97 | 26855.2  | 5.48  | HUMAN | B7ZES5  | Target of rapamycin complex 2 subunit MAPKAP1                                               |
| 4798 | dirMS_041712_NAR_20mM_plus.18979.18979.2   | 2 | 13.31 | 0 | 9.89E+06 | (K)NLTFTTL(K)N/V/T/T/L/D/V/T/R(G)                  | 205.9  | 683.8948 | 1366.393 | -0.0055 | -0.4  | 5.83 | 42156.9  | 4.75  | HUMAN | ET6RM6  | Actin, cytoplasmic 1 (Fragment)                                                             |
| 4799 | dirMS_041712_NAR_50mM_plus.15410.15410.3   | 3 | 13.31 | 0 | 1.43E+06 | (R)IHLATV(L)RL A/S/T/V/L/H/L G V P Q/A/N/D G R (K) | 149.62 | 657.6802 | 1971.029 | -0.0034 | -1.7  | 5.32 | 71165.3  | 5.55  | HUMAN | SKS13   | Clastrin heavy chain 1                                                                      |
| 4800 | dirMS_041712_NAR_50mM_plus.2.5163.5163.3   | 3 | 13.31 | 0 | 3.81E+05 | M168M (R)JATAP(R)A/T/A/Q/V/L/V/G E P V (K)G        | 87.6   | 480.5727 | 1423.711 | 15.9925 | -1.7  | 9.8  | 29184.1  | 4.91  | HUMAN | EP9RQ9  | Elongation factor 1-delta                                                                   |
| 4801 | dirMS_041712_NAR_50mM_plus.2.7488.7488.3   | 3 | 13.31 | 1 | 3.52E+05 | (R)IVVADP(R)V/V/A/S/D K E/T/E V L/R(T)             | 105.87 | 470.5836 | 1409.727 | 0.0092  | 6.5   | 4.68 | 14478.1  | 9.37  | HUMAN | CH19D   | 60S ribosomal protein L22-like 1                                                            |
| 4802 | dirMS_041712_NAR_60mM_plus.18287.18287.3   | 3 | 13.31 | 1 | 9.34E+05 | (K)KWFNRG(K)N/V/K F Q M/A/V/Y/S N/L I R(A)         | 152.85 | 571.6293 | 1712.879 | -0.0055 | -3.2  | 8.69 | 14683.8  | 10.19 | HUMAN | F37308  | Signal recognition particle 14 kDa protein                                                  |
| 4803 | dirMS_041712_NAR_30mM_minus.19195.19195.2  | 2 | 13.31 | 0 | 1.03E+06 | (K)TVLWV(L)K/T/V/L/V/W/D/L/V/L/V/L                 | 159.23 | 511.233  | 971.54   | 0.0008  | 4.6   | 5.27 | 10400.0  | 4.65  | HUMAN | BAD08P  | Histone-binding protein RBAP4                                                               |
| 4804 | dirMS_041712_NAR_50mM_minus.12500.13012.3  | 3 | 13.3  | 1 | 7.56E+06 | (R)IQLVEE(R)Q/V/L/V/E E L D R A Q E/R(L)           | 140.42 | 576.6348 | 1727.892 | -0.0024 | -1.4  | 4.25 | 31923.6  | 4.85  | HUMAN | B7Z596  | Tropomyosin alpha-1 chain                                                                   |
| 4805 | dirMS_041712_NAR_60mM_minus.14322.14460.3  | 3 | 13.3  | 1 | 3.35E+05 | (K)KSDIDE(K)K S D I/O E/V/L/V/L/E Q/S(R)I          | 139.68 | 530.2846 | 1588.854 | -0.0148 | -9.3  | 4.56 | 72445.7  | 5.07  | HUMAN | P10201  | 78 kDa glucose-regulated protein                                                            |
| 4806 | dirMS_041712_NAR_60mM_minus.16973.16993.3  | 3 | 13.3  | 1 | 2.04E+06 | (K)ILGIDFF(K)N/V/L/D/P/P/N/K E L I N L (K)S)       | 155.23 | 522.6138 | 1565.832 | -0.0054 | -3.4  | 6.07 | 45508.6  | 5.5   | HUMAN | ABK7Q2  | Heat shock cognate 71 kDa protein                                                           |
| 4807 | dirMS_041712_NAR_60mM_minus.5365.5365.3    | 3 | 13.3  | 0 | 2.13E+06 | (R)RISGSA(R)S P/Q A/V A/T/S/S E Q L A Q (K)G       | 85.48  | 622.961  | 1866.869 | 0.0005  | 0.2   | 6.85 | 74981.5  | 9.96  | HUMAN | OT210   | 75k kDaRNA methylphosphate capping enzyme                                                   |
| 4808 | dirMS_041712_NAR_120mM_plus.23757.23754    | 4 | 13.3  | 2 | 2.20E+05 | (R)RVSVMV(R)R G/V/L/M I/LA/V/D A/V/I L E A (K)G    | 173.09 | 576.4805 | 1713.009 | -0.001  | -6.6  | 8.59 | 25225.7  | 9.52  | HUMAN | E7ESHA  | 60S ribosomal protein, mitochondrial (Fragment)                                             |
| 4809 | dirMS_041712_NAR_30mM_plus.2.11785.11785.2 | 2 | 13.3  | 0 | 5.40E+05 | (K)IVASGGC(K)V/A/S/G/C/L/D I/N S V S (K)G          | 114.82 | 675.3393 | 1349.673 | -0.0016 | -1.2  | 5.81 | 56377    | 7.19  | HUMAN | E7ETT1  | Propionyl-CoA carboxylase beta chain, mitochondrial                                         |
| 4810 | dirMS_041712_NAR_30mM_plus.20771.20771.2   | 2 | 13.3  | 0 | 3.91E+05 | (R)ISVPPA(R)R I/V/P A/A/E/L/E S R(V)               | 162.33 | 642.8602 | 1284.716 | -0.0027 | -2.1  | 4.53 | 533778   | 5.74  | HUMAN | Q15149  | Plectin                                                                                     |
| 4811 | dirMS_041712_NAR_30mM_plus.2650.2750.27    | 2 | 13.3  | 0 | 1.24E+06 | (R)IVAVPR(R)R A/P E/H/P L/V/L/V/L/V/L/V/L          | 139.8  | 477.5543 | 1854.064 | -0.001  | -3.6  | 4.75 | 18032.2  | 5.25  | HUMAN | E7EVE5  | Actin, cytoplasmic 1 (Fragment)                                                             |
| 4812 | dirMS_041712_NAR_40mM_plus.10416.10416.2   | 2 | 13.3  | 0 | 9.40E+04 | (K)IGGIGY(K)G I/G I/G I/V P V G (K)G               | 125.75 | 513.3081 | 1025.611 | -0.0013 | -1.2  | 9.75 | 50482.3  | 9.31  | HUMAN | PR63D4  | Elongation factor 1-alpha 1                                                                 |
| 4813 | dirMS_041712_NAR_40mM_plus.9428.9428.2     | 2 | 13.3  | 0 | 9.68E+04 | (R)ISVYNYE(R)S/V/N/Y N/E A T G G (Y)K)             | 118.55 | 651.3206 | 1301.637 | -0.0033 | -2.5  | 6    | 27549.9  | 4.39  | HUMAN | EP9B14  | Tubulin beta chain                                                                          |
| 4814 | dirMS_041712_NAR_60mM_plus.5300.5310.3     | 3 | 13.3  | 1 | 1.42E+05 | M171M (K)EMQLRQ(K)M Q/L/R/Q/E/L/E/R(R)             | 85.4   | 455.2157 | 1347.632 | 16.0004 | 4     | 4.49 | 26419.2  | 5.1   | HUMAN | HY9K87  | Splicing factor, proline- and glutamine-rich (Fragment)                                     |
| 4815 | dirMS_041712_NAR_30mM_minus.16330.16330.2  | 2 | 13.29 | 0 | 1.45E+05 | (R)ISVUGS(R)S I/L/S/VQ/L/V/R(I)                    | 142.08 | 422.7649 | 844.525  | -0.0026 | -3    | 4.97 | 295149.3 | 7.4   | HUMAN | Q26216  | Translational activator GCN1                                                                |
| 4816 | dirMS_041712_NAR_40mM_minus.2624.9624.2    | 2 | 13.29 | 0 | 1.24E+06 | (R)IVAVPR(R)R A/P E/H/P L/V/L/V/L/V/L/V/L          | 139.8  | 477.5543 | 1854.064 | -0.001  | -3.6  | 4.75 | 18032.2  | 5.25  | HUMAN | E7EVE5  | Actin, cytoplasmic 1 (Fragment)                                                             |
| 4817 | dirMS_041712_NAR_50mM_minus.14940.14940.3  | 3 | 13.29 | 0 | 4.19E+05 | (K)IALTCTP(K)A/L/V/L/T/C/P F E P P K (Y)K)         | 153.32 | 537.6375 | 1610.898 | 0.0005  | 0.3   | 8.59 | 49982    | 5.86  | HUMAN | BAD7D8  | T-complex protein 1 subunit epsilon                                                         |
| 4818 | dirMS_041712_NAR_30mM_minus.14259.14259.3  | 3 | 13.29 | 1 | 8.82E+05 | (R)IMSMEK(R)M/S M K E V D E K I/L/V N Q/N (K)      | 140.17 | 641.9701 | 1923.897 | -0.0015 | -0.8  | 4.68 | 40069.4  | 4.83  | HUMAN | E7EW1R  | Tubulin beta chain                                                                          |
| 4819 | dirMS_041712_NAR_120mM_plus.11424.11506.4  | 4 | 13.29 | 2 | 2.22E+06 | (K)IGQSPAS(K)G A/G P/S/V/P/R/T E E F E K (R)F)     | 119.4  | 472.5046 | 1886.997 | -0.0005 | -0.3  | 6.23 | 55361.8  | 6.62  | HUMAN | G5E42   | Protein disulfide isomerase family A, member 3, isoform CRA_b                               |
| 4820 | dirMS_041712_NAR_30mM_plus.15480.15480.2   | 2 | 13.29 | 0 | 4.29E+05 | (R)IQLVVEE(R)Q/V/L/V/E E L D R A Q E/R(L)          | 140.42 | 576.6348 | 1727.892 | -0.0024 | -1.4  | 4.25 | 31923.6  | 4.85  | HUMAN | B7Z596  | Tropomyosin alpha-1 chain                                                                   |
| 4821 | dirMS_041712_NAR_30mM_plus.13529.13529.2   | 2 | 13.29 | 0 | 1.10E+06 | (R)IUNTA(V)R I/A N/T/V/L A/K(G)G)                  | 124.65 | 496.774  | 992.541  | -0.0004 | -0.4  | 6.05 | 24936.4  | 6.82  | HUMAN | G3XAL0  | Malate dehydrogenase                                                                        |
| 4822 | dirMS_041712_NAR_30mM_plus.18971.19221.2   | 2 | 13.29 | 0 | 2.07E+05 | (K)YVPLQL(K)P/V/L/L/P/L/P G (K)G                   | 153.25 | 528.814  | 1056.627 | 0.0007  | 6.6   | 8.75 | 45228.3  | 6.03  | HUMAN | F5H737  | Adenosylmethioninase                                                                        |
| 4823 | dirMS_041712_NAR_30mM_plus.2211.22113.2    | 2 | 13.29 | 0 | 2.01E+05 | (K)NSDFV(K)N S 5/Y F/V/E/W/P N N V (V)K)           | 171.82 | 488.9189 | 1696.833 | -0.0024 | -1.4  | 6    | 42831.5  | 4.86  | HUMAN | AK85A4  | HCG198350A, isoform CRA_f                                                                   |
| 4824 | dirMS_041712_NAR_30mM_plus.11426.11426.3   | 3 | 13.29 | 0 | 3.39E+05 | (K)KIVASGGC(K)V/A/S/G/C/L/D I/N S V S (K)G         | 127.65 | 638.9243 | 1379.549 | -0.0005 | -0.2  | 8.65 | 52088.9  | 5.92  | HUMAN | E5H212  | 60S ribosomal protein L22                                                                   |
| 4825 | dirMS_041712_NAR_50mM_plus.2256.5256.3     | 3 | 13.29 | 0 | 1.37E+06 | (K)IATPQD(K)A/T/P Q Q/A/E V/H/L (K)G               | 86.38  | 488.5774 | 1466.723 | -0.0057 | -3.9  | 5.37 | 31075.7  | 5.65  | HUMAN | PR0374  | Triosephosphate isomerase                                                                   |
| 4826 | dirMS_041712_NAR_60mM_plus.20624.20647.3   | 3 | 13.29 | 0 | 7.27E+05 | (R)IGFHLR(L)R G F H/L P/E I/A/V/Q/V(Q)G)           | 168.62 | 514.9568 | 1542.843 | 0.0131  | 8.5   | 6.75 | 533778   | 5.74  | HUMAN | Q15149  | Plectin                                                                                     |
| 4827 | dirMS_041712_NAR_40mM_minus.21664.6234.2   | 2 | 13.28 | 0 | 9.42E+05 | (R)IESTSTN(R)R T I/E I/S/T/N/Y R(S)                | 101.98 | 488.2302 | 975.453  | 0.0001  | 0.1   | 8.46 | 43773.3  | 5.26  | HUMAN | F8V2Y9  | Keratin, type I cytoskeletal 1B                                                             |
| 4828 | dirMS_041712_NAR_60mM_minus.10872.11021.3  | 3 | 13.28 | 1 | 4.59E+05 | (K)IGSTTMS(K)S I/L/T/V/S E I P K D/N (R)R)         | 121.13 | 511.6045 | 1532.792 | 0.0075  | 4.9   | 4.68 | 27442.4  | 5.34  | HUMAN | ES6068  | Copine-3 (Fragment)                                                                         |
| 4829 | dirMS_041712_NAR_120mM_plus.18392.18392.4  | 4 | 13.28 | 0 | 4.29E+05 | (R)IQALRS(R)R I/L/S L/E L/V Q/A/E/R(I)D)           | 119.4  | 457.2483 | 1825.971 | 0.0046  | 2.5   | 6.92 | 433278   | 6.14  | HUMAN | C15149  | Plectin                                                                                     |
| 4830 | dirMS_041712_NAR_20mM_plus.16939.16939.3   | 3 | 13.28 | 0 | 3.07E+05 | (K)IVNAA(V)K Q/L I A/V/A/E/A/Q/L I/L Q (R)M)       | 187.85 | 518.2975 | 1552.881 | -0.0026 | -1.7  | 5.97 | 10728.1  | 9.15  | HUMAN | Q9Y514  | Mitochondrial import inner membrane translocase subunit Tim13                               |
| 4831 | dirMS_041712_NAR_30mM_plus.18927.18927.2   | 2 | 13.28 | 0 | 1.87E+05 | (K)ILNLTG(K)N/L/V/L/I/G/T/V/G F Y (R)              | 152.5  | 570.3123 | 1139.621 | -0.0034 | -2.3  | 8.75 | 95141.7  | 5.22  | HUMAN | B7Z463  | Purromycin-sensitive aminopeptidase                                                         |
| 4832 | dirMS_041712_NAR_30mM_plus.20780.20780.3   | 3 | 13.28 | 0 | 1.06E+06 | (R)IVGSLR(L)R V Q/S L E I/D/I/D/S S M (R)N)        | 162.32 | 502.9201 | 1506.747 | -0.0011 | -0.7  | 4.03 | 43773.3  | 5.26  | HUMAN | F8V2Y9  | Keratin, type I cytoskeletal 1B                                                             |
| 4833 | dirMS_041712_NAR_30mM_plus.2670.2670.2     | 2 | 13.28 | 0 | 5.73E+05 | (R)ISVYNYE(R)S/V/N/Y N/E A T G G (Y)K)             | 85.4   | 455.2157 | 1347.632 | 16.0004 | 4     | 4.49 | 26419.2  | 5.1   | HUMAN | HY9K87  | Splicing factor, proline- and glutamine-rich (Fragment)                                     |
| 4834 | dirMS_041712_NAR_40mM_plus.6857.6857.2     | 2 | 13.28 | 0 | 5.56E+03 | (R)ISLVAGD(R)S I/L/S/VQ/L/V/R(I)                   | 100.35 | 508.2775 | 1015.553 | -0.0044 | -5.3  | 6    | 33378    | 5.74  | HUMAN | Q15149  | Plectin                                                                                     |
| 4835 | dirMS_041712_NAR_50mM_plus.10871.10871.3   | 3 | 13.28 | 0 | 4.89E+05 | (R)EALLSRA(R)E A/L/S/S A/V D H S G D E V (K)F)     | 124.7  | 552.9403 | 1656.807 | -0.0012 | -0.7  | 4.31 | 57204.9  | 6.01  | HUMAN | FS0W65  | T-complex protein 1 subunit beta                                                            |
| 4836 | dirMS_041712_NAR_60mM_plus.14426.14426.2   | 2 | 13.28 | 1 | 8.40E+05 | (K)KVPQVS(K)K I/V/P Q V/S/T P/L T V E V S (R)      | 130.82 | 420.4708 | 1639.938 | -0.0034 | -2.1  | 8.75 | 57751.3  | 6.9   | HUMAN | B7WRW0  | Serum albumin                                                                               |
| 4837 | dirMS_041712_NAR_30mM_plus.15564.15589.3   | 3 | 13.28 | 1 | 2.59E+05 | (K)KIALDLS(K)K I/L/S/V/S/G/D V/E G G P (R)R)       | 138.02 | 535.9438 | 1605.823 | -0.0031 | -3.9  | 4.68 | 52088.9  | 6.09  | HUMAN | Q20739  | Peptidyl-prolyl cis-trans isomerase FKBP4                                                   |
| 4838 | dirMS_041712_NAR_60mM_plus.7690.7704.3     | 3 | 13.28 | 0 | 9.11E+05 | (K)SLFGCEK(K)I/L/D E/C/P F H S T (R)R)             | 98.37  | 517.2234 | 1045.652 | 0.0034  | 2.2   | 5.32 | 51260.6  | 5.39  | HUMAN | PR3378  | Heterogeneous nuclear ribonucleoprotein K                                                   |
| 4839 | dirMS_041712_NAR_20mM_plus.6903.6903.2     | 2 | 13.27 | 0 | 1.34E+05 | M453M (K)M IATP E Q/V I G (K)G                     | 115.42 | 545.2807 | 1073.566 | 15.9882 | -6.2  | 6    | 64202.5  | 6.4   | HUMAN | B1AHC7  | X-ray repair complementing defective repair in Hansen hamster cells (Ku autoantigen, 70kDa) |
| 4840 | dirMS_041712_NAR_30mM_minus.9963.10045.2   | 2 | 13.27 | 0 | 8.40E+05 | (K)IAGDGL(K)G I/A/G I/P G I G S G V (R)A)          | 108.65 | 492.2788 | 981.563  | -0.0129 | -13.1 | 9.75 | 258215.9 | 5.48  | HUMAN | E7RW95  | Filamin-B                                                                                   |
| 4841 | dirMS_041712_NAR_30mM_plus.18759.18759.2   | 2 | 13.27 | 0 | 2.00E+05 | (K)IGSTTMS(K)S I/L/T/V/S E I P K D/N (R)R)         | 200.13 | 658.8999 | 1316.794 | -0.0111 | -0.9  | 8.72 | 15791.7  | 9.22  | HUMAN | BAD056  | Heterogeneous nuclear ribonucleoproteins C1/C2                                              |
| 4842 | dirMS_04171                                |   |       |   |          |                                                    |        |          |          |         |       |      |          |       |       |         |                                                                                             |

|      |                                            |   |       |                 |                                               |        |          |           |         |      |      |          |       |       |        |                                                                                                |
|------|--------------------------------------------|---|-------|-----------------|-----------------------------------------------|--------|----------|-----------|---------|------|------|----------|-------|-------|--------|------------------------------------------------------------------------------------------------|
| 4901 | dirMS_041712_NAR_30mM_plus2.13660.13682.2  | 2 | 13.23 | 0.527E+05       | (KIVSYEAK)(K)S(V)I/V/E/A/M/R(I)               | 124.8  | 484.7469 | 968.487   | -0.0005 | -0.5 | 5.97 | 533778   | 5.74  | HUMAN | Q15149 | Plectin                                                                                        |
| 4902 | dirMS_041712_NAR_30mM_plus2.21891.21891.2  | 2 | 13.23 | 0.817E+04       | (KIGVYQK)(K)I/L/V/Q/A/L/U/L/V/N/F/S/R(I)      | 169.73 | 738.3989 | 1475.796  | -0.005  | -4.1 | 9.75 | 369147   | 6.33  | HUMAN | P14550 | Alcophol hydrolyase [NADP+]                                                                    |
| 4903 | dirMS_041712_NAR_30mM_plus2.1760.7867.2    | 2 | 13.23 | 1.176E+05       | (KIVTSEEM)(K)T/E/I/S/V/N/R(I)                 | 92.85  | 497.887  | 985.551   | -0.009  | -1.9 | 5.24 | 492121   | 4.9   | HUMAN | AKM085 | Tubulin alpha-4A chain                                                                         |
| 4904 | dirMS_041712_NAR_50mM_plus2.15777.15792.3  | 3 | 13.23 | 0.118E+05       | (KILYVAV)(K)Q(Y)F/G/L/L/V/L/V/N/P/K/R(I)      | 115.55 | 564.9788 | 1692.907  | 0.0051  | 8.9  | 8.59 | 103056   | 6.19  | HUMAN | HT3300 | cAMP-dependent protein kinase type I-alpha regulatory subunit (Fragment)                       |
| 4905 | dirMS_041712_NAR_60mM_plus.6353.6353.3     | 3 | 13.23 | 0.294E+04       | (R)HNGAAE(R)H(N)G(A)A(E)P(E)A(E)T(A)R(G)      | 91.8   | 526.1006 | 1578.714  | 0.003   | 1.9  | 4.48 | 87537    | 9.67  | HUMAN | QY9446 | Phalloidin-3                                                                                   |
| 4906 | dirMS_041712_NAR_60mM_plus.9945.9981.3     | 3 | 13.23 | 1.499E+05       | (K)GSMMD(R)S(N)M/D/R/P/E/T/E/E/R(A)           | 109.93 | 566.2455 | 1696.722  | -0.0012 | -0.7 | 4.25 | 274416   | 6.68  | HUMAN | Q15956 | Eukaryotic translation initiation factor 4H                                                    |
| 4907 | dirMS_041712_NAR_20mM_plus.10770.10792.2   | 2 | 13.22 | 0.426E+05       | (K)DVVAA(R)K(V)N/A/V/A/V/V(T)                 | 155.98 | 483.2897 | 985.551   | -0.009  | -1.9 | 5.24 | 492121   | 4.9   | HUMAN | AKM085 | Tubulin alpha-4A chain                                                                         |
| 4908 | dirMS_041712_NAR_20mM_plus.9753.9753.2     | 2 | 13.22 | 0.157E+05       | (K)LEELKE(K)S(L)E(L)E(P)E(G)D(L)R(I)          | 147.78 | 643.8318 | 1286.659  | -0.0023 | -1.8 | 4.14 | 266161   | 5.68  | HUMAN | E99P10 | Epiplakin                                                                                      |
| 4909 | dirMS_041712_NAR_40mM_plus.10982.10982.3   | 3 | 13.22 | 0.488E+05       | (R)DAGEE(R)D(A)G(E)G/L/A/V/L/Q/T/Q/G/K/P/K(R) | 147.97 | 657.0157 | 1969.024  | 0.0089  | 4.5  | 4.32 | 2582159  | 5.48  | HUMAN | E7EN95 | Filamin-B                                                                                      |
| 4910 | dirMS_041712_NAR_40mM_plus.12011.12011.3   | 3 | 13.22 | 1.522E+03       | (R)HNEPTE(R)N(E)P/T/A/A/V/A/G/L/D/K/R(E)      | 153.6  | 606.0008 | 1815.996  | -0.0085 | -4.7 | 6.07 | 724457   | 5.07  | HUMAN | P11021 | 78 kDa glucose-regulated protein                                                               |
| 4911 | dirMS_041712_NAR_50mM_plus.13264.13264.3   | 3 | 13.22 | 0.109E+05       | (R)KIMETA(K)M(L)D/A/E/D/E/V/G/T/A/R/P/E/K(E)  | 143.52 | 587.2894 | 1759.853  | -0.0006 | 0.3  | 4.1  | 1077010  | 5.38  | HUMAN | B77116 | Actinin alpha 1 isoform 3                                                                      |
| 4912 | dirMS_041712_NAR_50mM_plus.1595.1595.1     | 1 | 13.22 | 0.821E+04       | (K)DAAAK(K)S(A)N(K)L/V/L/V/L/V/L/V/L/R(K)     | 158.97 | 541.6249 | 1647.858  | -0.0004 | -0.2 | 4.18 | 56407    | 5.42  | HUMAN | HT3300 | Keratin, type II cytoskeletal 8                                                                |
| 4913 | dirMS_041712_NAR_50mM_plus.1845.1845.3     | 3 | 13.22 | 1.145E+05       | (K)LTSDO(K)U(L)T/D/D/V/K/E/Q/Y/V(L)           | 115.95 | 480.252  | 1438.742  | -0.001  | -0.7 | 4.56 | 15273.5  | 10.39 | HUMAN | E9P550 | 40S ribosomal protein S13 (Fragment)                                                           |
| 4914 | dirMS_041712_NAR_20mM_plus.17537.17537.2   | 2 | 13.22 | 0.161E+05 M74m  | (R)MIAGG(R)M(V)A(G)Q(V)I(L)N(L)A(E)P(K)V(I)   | 192.85 | 849.9568 | 1682.915  | 15.9918 | -1.9 | 4.17 | 15791.1  | 9.22  | HUMAN | B4DSU6 | Heterogeneous nuclear ribonucleoproteins C1/C2                                                 |
| 4915 | dirMS_041712_NAR_30mM_plus.14801.14803.2   | 2 | 13.22 | 0.421E+05       | (K)GCFPLP(K)C(S)F/L/P/D/P/G/Q(I)              | 140.9  | 656.306  | 1311.6004 | 0.0029  | 0.7  | 5.83 | 63888.6  | 5.11  | HUMAN | BJAUV9 | Prospodin                                                                                      |
| 4916 | dirMS_041712_NAR_30mM_plus2.21621.21660.2  | 2 | 13.22 | 0.317E+05       | (R)FSMNN(R)S(V)W/V/W/V/S/L/R(I)               | 169.12 | 631.675  | 1558.606  | 0.0035  | 2.8  | 9.75 | 83880.6  | 7.33  | HUMAN | F5H865 | Protein transport protein Sec23A                                                               |
| 4917 | dirMS_041712_NAR_30mM_plus2.2224.22282.2   | 2 | 13.22 | 0.108E+06       | (K)IGFPWV(K)G(F)P/W/S/E/R(I)                  | 173.1  | 552.8032 | 1104.584  | 0.0155  | 14   | 6    | 71218.8  | 6.34  | HUMAN | A7YU8  | Radixin                                                                                        |
| 4918 | dirMS_041712_NAR_30mM_plus2.5795.6002.2    | 2 | 13.22 | 0.694E+05       | (R)EMEE(R)M(E)F/Q/M/R(I)                      | 85.55  | 476.6984 | 952.386   | 0.0032  | 3.4  | 4.25 | 26419.2  | 5.1   | HUMAN | HD9K7  | Splicing factor, proline- and glutamine-rich (Fragment)                                        |
| 4919 | dirMS_041712_NAR_50mM_plus2.14314.14314.3  | 3 | 13.22 | 1.838E+05       | (K)ATLPSF(K)T(L)M/P/S/D/K/L/P/G/K(M)          | 143.57 | 457.5906 | 1370.768  | -0.0106 | -3.7 | 8.64 | 118930.9 | 5.49  | HUMAN | P22314 | Ubiquitin-like modifier-activating enzyme 1                                                    |
| 4920 | dirMS_041712_NAR_120mM_plus.11517.11578.4  | 4 | 13.21 | 0.181E+05       | (R)TVELE(R)T(G)V/E/L/G/K/P/T/H/T/V/N/A/K(A)   | 117.05 | 425.4844 | 1698.917  | -0.0016 | -0.9 | 8.29 | 283472.4 | 5.71  | HUMAN | P21333 | Filamin-A                                                                                      |
| 4921 | dirMS_041712_NAR_30mM_plus.10395.10640.2   | 2 | 13.21 | 0.852E+05       | (K)YEVLA(K)Y(E)T(L)A/M/N/Q(I)                 | 111.27 | 506.7468 | 1012.477  | 0.0055  | 9.4  | 4.53 | 43737.3  | 5.26  | HUMAN | F8V279 | Keratin, type I cytoskeletal 18                                                                |
| 4922 | dirMS_041712_NAR_30mM_plus.19111.19111.2   | 2 | 13.21 | 0.194E+05       | (K)MALLQ(K)M(A)I(Q)M(K)                       | 158.5  | 474.2745 | 947.542   | 0.0001  | 0.1  | 8.5  | 90316.8  | 5.52  | HUMAN | Q13263 | Transcription intermediary factor 1-beta                                                       |
| 4923 | dirMS_041712_NAR_50mM_plus.14712.14712.3   | 3 | 13.21 | 1.298E+05       | (R)IAVTEL(R)R(A)V/T/L/E/L/G/P/E/D/R(K)        | 152.25 | 566.9683 | 1698.891  | -0.0005 | -0.3 | 4.25 | 25685.9  | 6.4   | HUMAN | E9P071 | Tinclin                                                                                        |
| 4924 | dirMS_041712_NAR_50mM_plus.14901.14904.3   | 3 | 13.21 | 1.169E+05       | (K)LAQFQ(K)R(L)A(S)Q(L)Q(S)L/K/D/K(K)         | 152.8  | 510.6213 | 1528.853  | -0.004  | -2.6 | 6    | 14867.7  | 5.51  | HUMAN | F18206 | Trascin                                                                                        |
| 4925 | dirMS_041712_NAR_50mM_plus.17774.17774.3   | 3 | 13.21 | 2.31E+05        | (K)LAQFQ(K)R(L)A(Q)G(V)E/V/D/R(K)             | 153.5  | 520.3943 | 1558.895  | 0.0032  | 2    | 6.07 | 26161    | 5.68  | HUMAN | E99P10 | Epiplakin                                                                                      |
| 4926 | dirMS_041712_NAR_60mM_plus.6677.6677.3     | 3 | 13.21 | 1.784E+04       | (R)IVVSSIE(R)N(V)S/I/Q/T/G/E/A/K(K)           | 96.13  | 502.2642 | 1504.785  | -0.0073 | -4.8 | 4.79 | 8491.4   | 6.28  | HUMAN | ESR184 | 14-3-3 protein zeta/delta (Fragment)                                                           |
| 4927 | dirMS_041712_NAR_20mM_plus.10506.10506.3   | 3 | 13.21 | 0.260E+05       | (R)IAQIF(R)R(Q)F/A/N/V/D/D/N/A/R(I)           | 104.04 | 440.5608 | 1319.67   | -0.0024 | -1.8 | 5.88 | 43773.3  | 5.26  | HUMAN | F8V279 | Keratin, type I cytoskeletal 18                                                                |
| 4928 | dirMS_041712_NAR_20mM_plus.18103.18103.3   | 3 | 13.21 | 0.138E+05       | (R)IAVLQD(R)R(L)N(L)V/D/E/P/S/T/D/S/V(S)      | 156.95 | 539.2833 | 1615.836  | -0.0006 | -0.4 | 4.03 | 27549.9  | 4.39  | HUMAN | E9P014 | Tubulin beta chain                                                                             |
| 4929 | dirMS_041712_NAR_30mM_plus2.12009.12032.2  | 2 | 13.21 | 1.199E+05       | (K)IMKTE(R)R(R)G(V)S/P/W/D/L/D(I)             | 116.15 | 561.3815 | 1188.718  | -0.0002 | -0.5 | 9.27 | 37257.6  | 6.28  | HUMAN | Q15149 | Coatomer subunit gamma-1                                                                       |
| 4930 | dirMS_041712_NAR_30mM_plus2.19411.19411.2  | 2 | 13.21 | 0.185E+04       | (K)IMKTE(R)K(M)N/E/L/N/E/L/K(I)               | 115.87 | 650.7974 | 1300.588  | -0.0003 | -0.2 | 4.25 | 28580.2  | 4.35  | HUMAN | QUNFNO | Protein Nip5ap homolog 3A                                                                      |
| 4931 | dirMS_041712_NAR_30mM_plus2.19620.19761.2  | 2 | 13.21 | 0.395E+05       | (K)SINVEE(K)S(N)N(I)M/D/W/V/L/K(K)            | 156.78 | 667.8205 | 1334.641  | -0.0072 | -5.4 | 4.37 | 18511.8  | 5.62  | HUMAN | D6R970 | Heterogeneous nuclear ribonucleoprotein H (Fragment)                                           |
| 4932 | dirMS_041712_NAR_30mM_plus2.19740.19740.2  | 2 | 13.21 | 0.355E+05       | (K)SINVEE(K)S(N)N(I)M/D/W/V/L/K(K)            | 156.9  | 667.8205 | 1334.641  | -0.0072 | -5.4 | 4.37 | 18511.8  | 5.62  | HUMAN | D6R970 | Heterogeneous nuclear ribonucleoprotein H (Fragment)                                           |
| 4933 | dirMS_041712_NAR_30mM_plus2.19740.19740.2  | 2 | 13.21 | 0.355E+05       | (R)ICTDPE(K)R(L)S(V)I/P/D/L/D(I)              | 113.25 | 651.6815 | 1366.009  | -0.009  | -5.1 | 6.35 | 333778   | 5.74  | HUMAN | Q15149 | Plectin                                                                                        |
| 4934 | dirMS_041712_NAR_30mM_plus2.15534.15534.2  | 2 | 13.22 | 0.329E+04       | (R)ELMANK(R)E(L)M/A/N/Q/L/V/V(M)              | 138.07 | 560.8108 | 1120.618  | -0.004  | -3.6 | 8.75 | 51636.5  | 8.68  | HUMAN | F7EJ23 | Rab GDP dissociation inhibitor beta                                                            |
| 4935 | dirMS_041712_NAR_40mM_plus.12956.12956.3   | 3 | 13.22 | 0.154E+05       | (K)GVITGH(K)G(V)I/V/G/P/A/T/V/G/I/K/P/G/F(V)  | 159.62 | 624.6828 | 1872.041  | -0.0073 | -3.9 | 1.0  | 91839.6  | 9.22  | HUMAN | BE4E30 | ATP-citrate synthase                                                                           |
| 4936 | dirMS_041712_NAR_50mM_plus.14899.14846.3   | 3 | 13.22 | 1.276E+05       | (K)NVLVQ(K)N(I)V/L/Q/L/D/N/P/G/A/K(R)         | 152.62 | 577.3116 | 1729.923  | -0.0029 | -1.7 | 6.07 | 64302.5  | 6.4   | HUMAN | BJAHC7 | X-ray repair complementing defective repair in Chinese hamster cells 6 (Ku autoantigen, 70kDa) |
| 4937 | dirMS_041712_NAR_120mM_plus2.21575.21575.4 | 4 | 13.22 | 2.441E+05 M145m | (R)IRGVW(R)R(R)G(V)N(L)A(V)I/D/V/L/E/L/K(Q)   | 166.23 | 433.0059 | 1714.009  | 15.9926 | -1.3 | 8.59 | 25225.7  | 9.52  | HUMAN | F7EJ23 | 60 kDa heat shock protein, mitochondrial (Fragment)                                            |
| 4938 | dirMS_041712_NAR_20mM_plus.17701.18014.2   | 2 | 13.22 | 0.221E+05       | (R)IAEAP(R)R(S)I/V/P/A/E/L/L/E/R(K)           | 159.48 | 424.8613 | 1284.716  | -0.0005 | -0.4 | 4.53 | 533778   | 5.74  | HUMAN | Q15149 | Plectin                                                                                        |
| 4939 | dirMS_041712_NAR_30mM_plus2.14612.14756.2  | 2 | 13.22 | 0.566E+05       | (K)IAWALS(K)I(A)W/L/S/R(K)                    | 129.9  | 408.7395 | 816.473   | -0.0009 | -1.1 | 9.75 | 21005.6  | 5.12  | HUMAN | Q04760 | Lactylglutathione lyase                                                                        |
| 4940 | dirMS_041712_NAR_30mM_plus2.16024.16024.2  | 2 | 13.22 | 1.146E+06       | (R)IMAGM(R)M(A)G(W)G/L/E/R(M)                 | 137.2  | 561.2636 | 1125.518  | 0.002   | 1.7  | 5.75 | 77799.7  | 9.09  | HUMAN | PS2272 | Heterogeneous nuclear ribonucleoprotein M                                                      |
| 4941 | dirMS_041712_NAR_30mM_plus2.21420.21550.2  | 2 | 13.22 | 0.350E+05       | (K)FDJGQ(K)P(D)S(I)I/L/G/M/A/V/L(I)           | 167.42 | 620.3199 | 1239.619  | 0.0135  | 10.9 | 5.83 | 32905.8  | 5.88  | HUMAN | C9H19  | Cathepsin D light chain (Fragment)                                                             |
| 4942 | dirMS_041712_NAR_50mM_plus.18638.18638.3   | 3 | 13.22 | 1.186E+05       | (K)IAEAP(R)R(S)I/V/P/A/E/L/L/E/R(K)           | 159.48 | 424.8613 | 1284.716  | -0.0005 | -0.4 | 4.53 | 533778   | 5.74  | HUMAN | Q15149 | Plectin                                                                                        |
| 4943 | dirMS_041712_NAR_60mM_plus.19846.19854.3   | 3 | 13.22 | 1.110E+06       | (K)SLGDK(K)S(L)G/L/D/V/L/P/L(R)               | 163.93 | 411.5915 | 1232.761  | -0.0013 | -1.1 | 8.31 | 41827.5  | 7     | HUMAN | B7Z7A9 | Phosphoglycerate kinase                                                                        |
| 4944 | dirMS_041712_NAR_60mM_plus.20129.20287.3   | 3 | 13.22 | 0.468E+05       | (R)DFLLK(R)D(F)I/L/K/P/L/E/L/R(A)             | 165.73 | 445.8283 | 1243.741  | -0.0105 | -8.5 | 6.07 | 30944.2  | 6.52  | HUMAN | BIQ2N1 | ATP-dependent RNA helicase DDX39A                                                              |
| 4945 | dirMS_041712_NAR_120mM_plus.9752.9776.3    | 3 | 13.19 | 1.402E+05       | (K)YAGDCK(K)E/G/K/D/G/Y/N/V/T/L/S/K(T)        | 107.67 | 493.9089 | 1479.711  | 0.0007  | 0.5  | 8.38 | 11854.4  | 6.57  | HUMAN | P31949 | Protein S100-A11                                                                               |
| 4946 | dirMS_041712_NAR_30mM_plus.16074.16074.2   | 2 | 13.19 | 0.248E+04       | (K)IGDQ(K)S(F)G(E)G/G/S/P/S/K(I)              | 141.03 | 577.7702 | 1154.53   | 0.0022  | 2.8  | 5.72 | 46943.7  | 6.54  | HUMAN | Q78374 | Alcophol hydrolyase [NADP] cytoplasmic                                                         |
| 4947 | dirMS_041712_NAR_30mM_plus.8517.8726.2     | 2 | 13.19 | 1.644E+07       | (R)QLTGL(R)K(L)T/L/Q/L/G/K/N/L(I)             | 101.52 | 523.2783 | 1045.552  | -0.0011 | -3   | 4.53 | 15588.1  | 4.66  | HUMAN | F8V967 | Keratin, type II cytoskeletal 8 (Fragment)                                                     |
| 4948 | dirMS_041712_NAR_40mM_plus.12585.12585.3   | 3 | 13.19 | 1.598E+05       | (R)VCENP(R)V(C)E/V/I/V/L/C/N/K/D/I/K(D)       | 157.7  | 657.6842 | 1971.04   | -0.0021 | -1.1 | 6.04 | 14844.8  | 5.89  | HUMAN | B4DV51 | GTP-binding nuclear protein Ran                                                                |
| 4949 | dirMS_041712_NAR_50mM_plus.8778.8778.3     | 3 | 13.19 | 1.153E+05       | (K)SPFVPS(K)S(P)E/V/S/V/D/A/Q/D/S/K(V)        | 117.15 | 555.6099 | 1664.813  | 0.0025  | 1.5  | 4.56 | 258215.9 | 5.48  | HUMAN | E7EN95 | Filamin-B                                                                                      |
| 4950 | dirMS_041712_NAR_50mM_plus.6578.6578.3     | 3 | 13.19 | 0.981E+04       | (K)XCPK(K)S(V)G/K/G/S/L/Q/D/S/Q/L/K(K)        | 95.25  | 530.5882 | 1589.759  | -0.0057 | -3.6 | 6.07 | 9122.2   | 9.22  | HUMAN | X7E12  | Mitochondrial import inner membrane translocase subunit Tim13                                  |
| 4951 | dirMS_041712_NAR_120mM_plus.16832.16849.4  | 4 | 13.19 | 1.389E+05       | (R)KLVK(R)K(V)E/L/V/P/A/E/L/L/E/R(K)          | 159.48 | 427.491  | 1298.944  | -0.0005 | -0.4 | 4.53 | 37257.6  | 4.58  | HUMAN | F8V967 | Heat shock protein HSP 90-alpha                                                                |
| 4952 | dirMS_041712_NAR_20mM_plus.10651.10651.2   | 2 | 13.19 | 0.678E+04       | (K)VLTVLQ(K)M(L)Q/L/V/P/N/K(A)                | 145.98 | 544.8057 | 1088.61   | -0.0057 | -5.3 | 8.56 | 9740.1   |       |       |        |                                                                                                |

|      |                                            |   |       |                 |                                                         |        |          |          |          |       |      |          |             |         |                                                                 |         |
|------|--------------------------------------------|---|-------|-----------------|---------------------------------------------------------|--------|----------|----------|----------|-------|------|----------|-------------|---------|-----------------------------------------------------------------|---------|
| 5010 | dirMS_041712_NAR_40mM_plus2.17449.17449.3  | 3 | 13.14 | 0.156E+05       | (R)IYVALTR(R)VYI(A)I(L)T H G V I S/G P A I S(R)         | 169.32 | 601.3376 | 1801.996 | 0.0023   | 1.3   | 8.73 | 24482.9  | 7.96 HUMAN  | B1A1A9  | Phosphoribosyl pyrophosphate synthetase 1                       |         |
| 5011 | dirMS_041712_NAR_50mM_minus.18679.19211.3  | 3 | 13.14 | 1.652E+06       | (R)DLGAGR (R)D(L)I/LA/G/R/D L TO YV(LM)KI               | 167.65 | 541.9524 | 1623.841 | -0.016   | -1    | 4.43 | 37482.1  | 5.36 HUMAN  | EP36Q0  | Actin, gamma-enteric smooth muscle                              |         |
| 5012 | dirMS_041712_NAR_50mM_plus.17626.7626.3    | 3 | 13.14 | 1.333E+04 M25m  | (R)TDDA(R)K(T)I/LA/G/R/S K E T E M(A,R,K)D              | 167.65 | 541.9524 | 1623.841 | -0.016   | -1    | 4.43 | 37482.1  | 5.36 HUMAN  | EP36Q0  | Actin, gamma-enteric smooth muscle                              |         |
| 5013 | dirMS_041712_NAR_40mM_plus2.15870.15870.2  | 2 | 13.13 | 0.238E+04       | (R)KMLTAE(K)M(L)I/LY T E V R(A)                         | 139.67 | 567.2971 | 1125.597 | -0.0103  | -9.2  | 5.75 | 51636.5  | 8.68 HUMAN  | EF70Z3  | Rab GDP dissociation inhibitor beta                             |         |
| 5014 | dirMS_041712_NAR_40mM_plus2.8859.8859.3    | 3 | 13.13 | 1.238E+05       | (R)IYLVAN(R)R(V)I/LA/W D P D A D R L A V A E K(Q)       | 134.3  | 603.9966 | 1809.97  | 0.0047   | 2.6   | 4.23 | 23837.5  | 6.16 HUMAN  | BAE0G8  | Prothymosin                                                     |         |
| 5015 | dirMS_041712_NAR_50mM_minus.26704.16704.3  | 3 | 13.13 | 1.157E+05       | (R)KINPPT(K)K(I)P I P P/T/L K D F A(R)A                 | 163.35 | 452.9385 | 1356.789 | 0.0124   | 8.1   | 8.59 | 20960.6  | 7.05 HUMAN  | HOYK1U  | Tropomodulin-3 (Fragment)                                       |         |
| 5016 | dirMS_041712_NAR_120mM_plus.13751.13751.2  | 2 | 13.12 | 1.506E+06       | (R)KAFSDR(K)R(A)S I T V D V(R)R                         | 125.95 | 541.8621 | 1082.599 | -0.0022  | -1.1  | 8.75 | 19359.3  | 16.98 HUMAN | FRV054  | Keratin, type II cytoskeletal (Fragment)                        |         |
| 5017 | dirMS_041712_NAR_120mM_plus.17019.17019.4  | 4 | 13.13 | 1.553E+05       | (R)EILDTY(R)E(L)D T V/A/L/D E (K) E H A(N)R(Q)          | 142.12 | 442.9804 | 1768.933 | 0.003    | 1.7   | 4.5  | 61090.6  | 8.58 HUMAN  | Q43242  | 26S proteasome non-ATPase regulatory subunit 3                  |         |
| 5018 | dirMS_041712_NAR_20mM_plus.12591.12591.2   | 2 | 13.13 | 0.934E+04 M91m  | (R)IATGAS(R)A(I)T/G A/V/LA/O I I M A(R)Q                | 159.93 | 639.3398 | 1921.682 | -15.9903 | -6.3  | 5.88 | 17656.4  | 11.01 HUMAN | C3N9W5  | 60S ribosomal protein L24                                       |         |
| 5019 | dirMS_041712_NAR_20mM_plus.14844.14844.2   | 2 | 13.13 | 0.138E+05       | (R)KILGELG(K)L/L G E (L)U/L N A(K)I                     | 173.7  | 607.3421 | 1312.679 | -0.018   | -1.4  | 4.37 | 35566.4  | 9.3 HUMAN   | F23393  | Transaldolase                                                   |         |
| 5020 | dirMS_041712_NAR_30mM_plus.21520.11520.2   | 2 | 13.13 | 0.179E+05       | (R)KIVSQR(R)S(A)A/L/G E/L T U(R)E                       | 115.55 | 501.7877 | 1002.583 | -0.0149  | -14.8 | 6    | 109459.8 | 4.94 HUMAN  | FSG7R8  | General vesicular transport factor p115                         |         |
| 5021 | dirMS_041712_NAR_30mM_plus2.16838.16838.2  | 2 | 13.13 | 0.179E+05       | (R)KIVSQR(R)S(A)A/L/G E/L T U(R)E                       | 136    | 515.2641 | 1040.551 | -0.002   | 4.9   | 4.21 | 34479.9  | 6.15 HUMAN  | KT17    | 60S ribosomal protein L27 (Fragment)                            |         |
| 5022 | dirMS_041712_NAR_40mM_plus2.11550.11550.2  | 2 | 13.13 | 0.528E+04       | (R)ITTFDFV(R)T F A/D F V(R)R                            | 134.22 | 457.2245 | 913.441  | 0.0003   | 0.3   | 4.37 | 267260.7 | 5.95 HUMAN  | Q13308  | Acetyl-CoA carboxylase 1                                        |         |
| 5023 | dirMS_041712_NAR_50mM_plus2.10372.10373.3  | 3 | 13.13 | 0.448E+05       | (R)JAAASIFG(R)A(S)I/V G S A K P/D V T A A R(E)          | 122.1  | 511.2769 | 1531.823 | -0.0066  | -4.3  | 8.79 | 64861.3  | 5.86 HUMAN  | BA0D31  | Eukaryotic translation initiation factor 4B                     |         |
| 5024 | dirMS_041712_NAR_50mM_plus2.21377.21377.3  | 3 | 13.13 | 1.203E+05       | (R)ITGSLG(R)T E(L)G/L V/S/J S A M/V A I T E K(Q)        | 182.72 | 602.0007 | 1801.988 | -0.0009  | -0.5  | 5.81 | 31604.9  | 6.88 HUMAN  | G3V4T5  | Eukaryotic translation initiation factor 2 subunit 1 (Fragment) |         |
| 5025 | dirMS_041712_NAR_50mM_plus.7138.7138.2     | 2 | 13.13 | 0.172E+05       | (R)KSTTGGR(K)S I T/T T G V(L)Y(K)K                      | 95.58  | 560.8031 | 1320.6   | -0.0008  | -0.7  | 8.34 | 12137.8  | 9.3 HUMAN   | ASR0R0  | Elongation factor 1 alpha 1 (Fragment)                          |         |
| 5026 | dirMS_041712_NAR_120mM_minus.10503.10503.3 | 3 | 13.12 | 1.217E+05 M86m  | (R)KIMKELAE(K)M K E/V A/E/V A/V/L G(K)T                 | 111.63 | 423.557  | 1252.661 | 15.9959  | 0.7   | 5.9  | 17973    | 5.16 HUMAN  | EP96E5  | Heat shock cognate 71 kDa protein (Fragment)                    |         |
| 5027 | dirMS_041712_NAR_120mM_minus.13857.13857.3 | 3 | 13.12 | 1.194E+05       | (R)JIAWDD(R)R(A)W/D V/D E E/T R D F G(R)K               | 129.68 | 537.2494 | 1609.724 | 0.0095   | 5.9   | 4.11 | 80685.1  | 7.31 HUMAN  | PO5165  | Propionyl-CoA carboxylase alpha chain, mitochondrial            |         |
| 5028 | dirMS_041712_NAR_50mM_minus.15907.15907.3  | 3 | 13.12 | 0.364E+05       | (R)KLYGPTN(K)I/L Y G P T N/T S/P I N H V A R(F)         | 158.22 | 607.3221 | 1798.96  | -0.0081  | -4.5  | 8.75 | 60985.3  | 5.56 HUMAN  | Q75131  | Copine-3                                                        |         |
| 5029 | dirMS_041712_NAR_50mM_minus.16489.16489.3  | 3 | 13.12 | 0.177E+05       | (R)IGIVP(R)RIG G P/V I/V A/V G I T V Y G(L)K(V)         | 161.78 | 535.9583 | 1605.863 | -0.002   | -2    | 6.74 | 30427.2  | 7.21 HUMAN  | H3B9P7  | Alanine-ribon ligase, cytoplasmic (Fragment)                    |         |
| 5030 | dirMS_041712_NAR_50mM_minus.16617.16617.3  | 3 | 13.12 | 0.923E+04       | (R)JDSVDA(R)D S E/Q/V A/E I L K E/L A T U(S)            | 163.65 | 601.3217 | 1801.954 | -0.0036  | -2    | 4.41 | 104959.8 | 4.84 HUMAN  | FSG7R8  | General vesicular transport factor p115                         |         |
| 5031 | dirMS_041712_NAR_50mM_minus.17857.17857.3  | 3 | 13.12 | 0.301E+05       | (R)KINQLP(K)M N Q L C L P V I I P F/H T E/T A P(K)I     | 170.03 | 605.6843 | 1965.044 | -0.0057  | -2.9  | 5.4  | 51524.1  | 4.82 HUMAN  | FSH8I2  | Protein disulfide-isomerase                                     |         |
| 5032 | dirMS_041712_NAR_120mM_plus.12902.13175.3  | 3 | 13.12 | 0.951E+05       | (R)KHGPGV(K)M Y G P G(W)I/V S/M A/V A K(Q)              | 121.57 | 492.2383 | 1474.69  | 0.1088   | 7.3   | 8.6  | 23799.1  | 9.48 HUMAN  | P23284  | Peptidyl-prolyl cis-trans isomerase B                           |         |
| 5033 | dirMS_041712_NAR_120mM_plus.19510.19514.4  | 4 | 13.12 | 0.461E+05       | (R)KMLAAD(K)A H/L/LV/LA/D M A H V S G T V S(V)K(V)      | 155.57 | 430.2407 | 1717.942 | -0.0008  | -0.5  | 6.96 | 45386.1  | 9.89 HUMAN  | BA0D4U  | Serine hydroxymethyltransferase                                 |         |
| 5034 | dirMS_041712_NAR_20mM_plus.17306.17306.2   | 2 | 13.12 | 0.576E+05       | (R)KSTTPEL(K)K L I P T F L Y A K(L)R(A)                 | 189.78 | 622.3664 | 1303.726 | -0.001   | -4.1  | 4.53 | 14391.8  | 4.99 HUMAN  | G3V6E1  | Creatine kinase B-type (Fragment)                               |         |
| 5035 | dirMS_041712_NAR_30mM_plus2.17819.17821.2  | 2 | 13.12 | 0.929E+05       | (R)ISMVED(R)S M I V I/D (V)T G L R(L)                   | 146.58 | 560.7925 | 1120.567 | 0.011    | 9.9   | 4.37 | 334221.3 | 6.44 HUMAN  | P15924  | Desmoglein                                                      |         |
| 5036 | dirMS_041712_NAR_30mM_plus2.22321.22321.2  | 2 | 13.12 | 0.369E+05       | (R)IVNGNL(R)G N/L G/L A/T S/F R F N E R(N)              | 127.78 | 762.8926 | 1524.781 | -0.0026  | -1.7  | 5.97 | 73641.5  | 6.74 HUMAN  | 000071  | ATP-dependent RNA helicase DDXX3                                |         |
| 5037 | dirMS_041712_NAR_40mM_plus2.6668.674.2     | 2 | 13.12 | 0.539E+05       | (R)ITFSQD(R)P F I T I S/D C(K)I                         | 99.92  | 402.1734 | 801.339  | 0.0003   | 0.3   | 5.84 | 18511.8  | 5.62 HUMAN  | DB0R70  | Heterogeneous nuclear ribonucleoprotein H (Fragment)            |         |
| 5038 | dirMS_041712_NAR_40mM_plus2.8867.874.2     | 2 | 13.12 | 0.461E+05       | (R)KSTTPEL(K)K L I P T F L Y A K(L)R(A)                 | 121.57 | 492.2383 | 1474.69  | 0.1088   | 7.3   | 8.6  | 23799.1  | 9.48 HUMAN  | P23284  | Peptidyl-prolyl cis-trans isomerase A-like A                    |         |
| 5039 | dirMS_041712_NAR_40mM_plus.5735.5757.3     | 3 | 13.12 | 0.146E+05 M116m | (R)ITFADQ(R)R(T)A I P Q/V S P S P N R(Q)                | 88.28  | 480.5724 | 1423.711 | 15.9916  | -2.3  | 9.8  | 29184.1  | 4.91 HUMAN  | EP99Q0  | Elongation factor 1-delta                                       |         |
| 5040 | dirMS_041712_NAR_20mM_minus.1842.13842.2   | 2 | 13.11 | 0.240E+05       | (R)IYVLDD(S)R(I)V/L I/D S S L E Y(K)K                   | 189.37 | 640.3594 | 1279.714 | -0.0029  | -2.2  | 4.37 | 56186.7  | 5.47 HUMAN  | BA0UR8  | T-complex protein 1 subunit gamma                               |         |
| 5041 | dirMS_041712_NAR_30mM_plus.10454.10454.2   | 2 | 13.11 | 0.933E+05       | (R)KISGDFC(K)G S/D P/F D C L E(R)R                      | 115.28 | 549.7307 | 1098.452 | 0.0021   | 1.9   | 4.03 | 51260.6  | 5.39 HUMAN  | PE1578  | Heterogeneous nuclear ribonucleoprotein K                       |         |
| 5042 | dirMS_041712_NAR_120mM_plus.11066.11066.2  | 2 | 13.11 | 0.381E+05       | (R)KSEATA(K)E I L A/V L A/V G(K)T                       | 108.1  | 497.2652 | 994.525  | -0.0024  | -2.4  | 4.45 | 17973    | 5.16 HUMAN  | EP96E5  | Heat shock cognate 71 kDa protein (Fragment)                    |         |
| 5043 | dirMS_041712_NAR_30mM_minus.14926.15013.2  | 2 | 13.11 | 0.488E+05       | (R)KISLUSLV(L)I/L I/S V N A(R)G                         | 134.95 | 486.7933 | 972.583  | -0.0043  | -4.5  | 9.47 | 96827.3  | 5.88 HUMAN  | EP9K17  | Neutral alpha-glucosidase AB                                    |         |
| 5044 | dirMS_041712_NAR_30mM_minus.15199.15199.2  | 2 | 13.11 | 0.718E+05 M224m | (R)KISMQV(A)K M I/Y P/Q A/m Y(K)K                       | 135.72 | 587.2756 | 1157.548 | 15.9957  | 0.7   | 8.34 | 266161   | 5.68 HUMAN  | EP9PU0  | Epitaphin                                                       |         |
| 5045 | dirMS_041712_NAR_30mM_minus.2968.9689.2    | 2 | 13.11 | 0.478E+05       | (R)IYSLGPN(R)T S I/L G/V N P L G D K(M)                 | 106.28 | 501.2667 | 1001.526 | -0.0001  | -0.1  | 5.5  | 58004.4  | 5.33 HUMAN  | BZ7A11  | T-complex protein 1 subunit epsilon                             |         |
| 5046 | dirMS_041712_NAR_40mM_plus.11798.11798.3   | 3 | 13.11 | 0.224E+05       | (R)IYSLTGV(R)I A I S T L V N/L G E V D/A A/P D G A R(K) | 153.02 | 657.6842 | 1971.029 | 0.0086   | 4.4   | 5.32 | 71165.3  | 5.57 HUMAN  | K3153   | Cathrin heavy chain 1                                           |         |
| 5047 | dirMS_041712_NAR_50mM_minus.10828.10828.3  | 3 | 13.11 | 1.544E+05 M235m | (R)RIMSMEK(R)M S M E V D G I/V L V Q(V)K(N)             | 119.9  | 647.3011 | 1923.897 | -0.0015  | -1.8  | 4.68 | 40969.4  | 6.84 HUMAN  | FTW811  | Tubulin beta chain                                              |         |
| 5048 | dirMS_041712_NAR_120mM_plus.11198.11370.3  | 3 | 13.11 | 1.579E+05       | (R)IYTYVDF(R)Y I/T I/V D R D N R(V)                     | 112.43 | 488.2287 | 1462.671 | 0.0006   | 0.4   | 5.96 | 20599.3  | 9.19 HUMAN  | H7C1V0  | Cathepsin D light chain (Fragment)                              |         |
| 5049 | dirMS_041712_NAR_30mM_plus2.14411.14411.2  | 2 | 13.11 | 0.263E+05       | (R)IIEELAS(R)E L I/L E A/V S(R)M                        | 128.5  | 465.7671 | 930.525  | 0.0015   | 1.6   | 4.53 | 109301.2 | 7.85 HUMAN  | HY394   | Vigilin (Fragment)                                              |         |
| 5050 | dirMS_041712_NAR_50mM_plus2.18939.18939.2  | 2 | 13.11 | 0.342E+05       | (R)ITAEADU(R)R(T)A/E D/P L U E V A R(I)                 | 153.03 | 582.796  | 1164.59  | -0.0048  | -4.1  | 4.14 | 533778   | 5.74 HUMAN  | Q15149  | Plectin                                                         |         |
| 5051 | dirMS_041712_NAR_50mM_plus2.14722.14728.3  | 3 | 13.11 | 1.445E+05       | (R)IYSLGPN(R)T S I/L G/V N P L G D K(M)                 | 106.28 | 501.2667 | 1001.526 | -0.0001  | -0.1  | 5.5  | 58004.4  | 5.33 HUMAN  | BZ7A11  | T-complex protein 1 subunit epsilon                             |         |
| 5052 | dirMS_041712_NAR_50mM_plus2.17199.17390.3  | 3 | 13.11 | 1.539E+05       | (R)IYSLTGV(R)I A I S T L V N/L G E V D/A A/P D G A R(K) | 153.02 | 657.6842 | 1971.029 | 0.0086   | 4.4   | 5.32 | 71165.3  | 5.57 HUMAN  | K3153   | Cathrin heavy chain 1                                           |         |
| 5053 | dirMS_041712_NAR_50mM_plus2.17821.17821.3  | 3 | 13.11 | 0.210E+06       | (R)KIPVPHS(K)I/L V P H V/D I Q(L)K(Y)                   | 160.02 | 490.2766 | 1288.799 | -0.0015  | -1.2  | 6.74 | 45578.2  | 7.83 HUMAN  | BA0FL2  | Isocitrate dehydrogenase [NADP]                                 |         |
| 5054 | dirMS_041712_NAR_50mM_plus2.20718.20178.3  | 3 | 13.11 | 0.536E+05       | (R)IQIARPT(R)Q A/R A/P T A/V L S/D S L L K(L)           | 115.74 | 597.9952 | 1672.919 | -0.0045  | -2.5  | 9.99 | 150202.8 | 9.11 HUMAN  | ETW6W0  | Unconventional myosin-V                                         |         |
| 5055 | dirMS_041712_NAR_50mM_plus.352.3525.3      | 3 | 13.11 | 0.180E+06       | (R)KIPVPHS(K)I/L V P H V/D I Q(L)K(Y)                   | 108.1  | 563.2692 | 1682.792 | -0.0008  | 0.5   | 4.48 | 81363    | 8.73 HUMAN  | C3G5D9  | Propionyl-CoA carboxylase beta chain, mitochondrial             |         |
| 5056 | dirMS_041712_NAR_30mM_plus2.16938.16955.2  | 2 | 13.11 | 0.512E+05       | (R)KINSYSE(K)M S I L L E S/V A/F N A(K)A                | 146.62 | 652.3031 | 1303.999 | 0.0002   | 0.2   | 6    | 45508.6  | 6.5 HUMAN   | AKN7Q2  | Heat shock cognate 71 kDa protein                               |         |
| 5057 | dirMS_041712_NAR_30mM_minus.6585.6585.2    | 2 | 13.1  | 0.234E+05       | (R)KQYSEY(R)Q Q I Y E/S V A(N)R(Q)                      | 89.95  | 512.2534 | 1023.511 | -0.011   | -10.8 | 6    | 49709.6  | 6           | 49709.6 | 6                                                               | 49709.6 |
| 5058 | dirMS_041712_NAR_30mM_minus.29375.9395.2   | 2 | 13.1  | 0.301E+05       | (R)KLYSESA(K)I/L Y S E S/L A(R)R                        | 105.42 | 469.7484 | 938.494  | -0.0048  | -5    | 6    | 51636.5  | 8.68 HUMAN  | ETL023  | Rab GDP dissociation inhibitor beta                             |         |
| 5059 | dirMS_041712_NAR_20mM_plus.14327.14372.2   | 2 | 13.1  | 0.876E+04       | (R)KIVSDE(K)I V E S L S/D P L P N L V G(K)              | 170.28 | 743.3789 | 1488.754 | -0.0036  | -2.6  | 3.93 | 92752.5  | 4.76 HUMAN  | PA4625  | Endoplasmic reticulum stress protein 29                         |         |
| 5060 | dirMS_041712_NAR_20mM_plus.17131.17131.3   | 3 | 13.1  | 0.446E+05       | (R)IYVAVL(R)I V L G E L D L P L E V S V(R)S             | 189.48 | 524.6105 | 1569.83  | -0.002   | -2.1  | 4.03 | 31314.4  | 6.84 HUMAN  | FRV813  | Tubulin beta 5 chain                                            |         |
| 5061 | dirMS_041712_NAR_30mM_plus2.18332.18332.2  | 2 | 13.1  | 0.225E+05       | (R)KIVGELG(K)I V E(L)G/L D I E I N P(N)K                | 149.43 | 713.3669 | 1425.733 | -0.0067  | -4.7  | 4.14 | 20629.7  | 8.84 HUMAN  | Q13442  | 28 kDa heat- and acid-stable phosphoprotein                     |         |
| 50   |                                            |   |       |                 |                                                         |        |          |          |          |       |      |          |             |         |                                                                 |         |



|      |                                            |   |       |   |                |                                                 |        |          |          |         |       |      |          |       |       |        |                                                              |
|------|--------------------------------------------|---|-------|---|----------------|-------------------------------------------------|--------|----------|----------|---------|-------|------|----------|-------|-------|--------|--------------------------------------------------------------|
| 5228 | dirMS_041712_NAR_40mM_plus2.20068.20068.3  | 3 | 12.97 | 1 | 5.88E+05       | (KIEGGLGK)KGE G L/G/P L/P L I D V T R L K       | 189.8  | 631.0288 | 1891.076 | -0.0041 | -2.2  | 6.17 | 125252.2 | 5.82  | HUMAN | AGN1W5 | Peroxidoxin 2, isoform CRA_a                                 |
| 5229 | dirMS_041712_NAR_40mM_plus.7425.7429.2     | 2 | 12.97 | 0 | 2.931E+06      | (RISTSTIN)RIS TIF/S/TNY/RSS                     | 101.98 | 488.2297 | 975.453  | -0.0009 | -0.9  | 8.46 | 43737.3  | 5.26  | HUMAN | FBV29  | Keratin, type II cytoskeletal 18                             |
| 5230 | dirMS_041712_NAR_50mM_plus.6374.6381.3     | 3 | 12.97 | 0 | 6.38E+05 M432m | (KIEGSMGK)KLE I/G/S/LVQ/RI                      | 96.88  | 487.1452 | 1164.516 | -0.0005 | -1.3  | 6.17 | 56561.6  | 5.26  | HUMAN | FBV29  | Keratin, type II cytoskeletal 8                              |
| 5231 | dirMS_041712_NAR_60mM_plus.12184.12184.3   | 3 | 12.97 | 1 | 1.01E+06       | (RIMSJMK)RIM/S/M K E D EQI/M/L V Q/N KN         | 120.57 | 647.2001 | 1923.897 | -0.0049 | -0.2  | 4.68 | 40069.4  | 4.83  | HUMAN | FEV1R1 | Tubulin beta chain                                           |
| 5232 | dirMS_041712_NAR_60mM_plus.6433.6433.2     | 2 | 12.97 | 0 | 1.74E+05       | (RJDVAFT)RID AVI/TY/T/E H A K R                 | 92.18  | 567.775  | 1134.543 | 0.0001  | 0.1   | 5.32 | 113267.1 | 11.36 | HUMAN | PE2805 | Histone H4                                                   |
| 5233 | dirMS_041712_NAR_30mM_minus.14084.14084.2  | 2 | 12.96 | 0 | 2.19E+05       | (RIGANDPR)RIG A/N/D/P/M/C/D E M/R               | 130.03 | 737.7725 | 1474.54  | -0.0018 | -1.2  | 3.91 | 44277.3  | 7.81  | HUMAN | FE706E | T-complex protein 1 subunit alpha                            |
| 5234 | dirMS_041712_NAR_30mM_minus.10872.10872.2  | 2 | 12.96 | 0 | 1.32E+06       | (RINTWV)RIN T/W/I/V/Q/A/Q/R                     | 121.26 | 658.2819 | 1164.516 | -0.0005 | -1.3  | 6.17 | 56561.6  | 5.26  | HUMAN | PE5213 | C-terminal-binding protein 2                                 |
| 5235 | dirMS_041712_NAR_40mM_minus.8143.8143.3    | 3 | 12.96 | 1 | 1.38E+05       | (RIGDGLKS)RID G K LVV/S/E/S/D V/P K K           | 128.2  | 491.9311 | 1473.78  | -0.0008 | -0.5  | 4.56 | 56607.4  | 5.37  | HUMAN | FBV04A | Keratin, type II cytoskeletal 8                              |
| 5236 | dirMS_041712_NAR_50mM_minus.15108.15108.3  | 3 | 12.96 | 1 | 2.85E+05       | (KJVVVEAF)KJG V/E/V/S/F I D A E T/R/A           | 153.48 | 611.3243 | 1831.955 | 0.0035  | 1.9   | 4.41 | 80685.1  | 7.31  | HUMAN | POS165 | Propionyl-CoA carboxylase alpha chain, mitochondrial         |
| 5237 | dirMS_041712_NAR_120mM_plus.13319.13352.3  | 3 | 12.96 | 0 | 6.88E+05       | (KHIMGMO)KIM H/M/G/M/N/V/A/D/V M/R              | 123.07 | 478.8925 | 1434.662 | 0.0013  | 0.9   | 6.74 | 34590.2  | 9.84  | HUMAN | PA6777 | 60S ribosomal protein L5                                     |
| 5238 | dirMS_041712_NAR_120mM_plus.18691.18993.4  | 4 | 12.96 | 1 | 2.39E+06       | (KJQPPNPK)KJQ P/P/N/A/E K V E L H L R S         | 151.9  | 485.7703 | 1940.064 | -0.0046 | -2.4  | 6.75 | 52088.9  | 5.35  | HUMAN | QD2790 | Peptidyl-prolyl cis-trans isomerase FBK94                    |
| 5239 | dirMS_041712_NAR_20mM_plus.8356.8356.2     | 2 | 12.96 | 0 | 4.09E+04 M150m | (KJLMDKPK)KJL M/D/K/L/V/A/V/K                   | 120.4  | 409.047  | 1532.898 | -0.0002 | -0.7  | 4.17 | 80085.1  | 7.14  | HUMAN | FBV04A | Propionyl-CoA carboxylase alpha chain, mitochondrial         |
| 5240 | dirMS_041712_NAR_30mM_plus.4498.4498.2     | 2 | 12.96 | 0 | 3.33E+05 M131m | (KJAMPATS)KJA M/P/A/T S A E A G R/Q             | 73.1   | 503.7289 | 990.467  | 15.9832 | -11.6 | 6.05 | 16817.7  | 6.72  | HUMAN | HDY17C | TNFAIP3-interacting protein 1 (Fragment)                     |
| 5241 | dirMS_041712_NAR_30mM_plus.5484.5484.2     | 2 | 12.96 | 0 | 5.72E+05       | (RJJGADVG)RJG G I A/G/V/S/M/T/K/Q               | 83.05  | 432.7161 | 861.424  | 0.0005  | 0.6   | 8.75 | 16060.2  | 10.31 | HUMAN | P39019 | 40S ribosomal protein S19                                    |
| 5242 | dirMS_041712_NAR_30mM_plus.9560.9560.2     | 2 | 12.96 | 0 | 4.98E+05       | (KJTVACDQ)KJTA V I/V/D/P/R/P R/G                | 105.07 | 514.7643 | 1028.519 | 0.002   | 1.9   | 5.5  | 50199.4  | 4.75  | HUMAN | AGN222 | Tubulin beta-8 chain-like protein LOC260334                  |
| 5243 | dirMS_041712_NAR_40mM_plus.18461.18477.3   | 3 | 12.96 | 0 | 1.98E+06       | (KJALSEPR)KJAL S/E/P R P Y/L L U/G/A/K R        | 175.55 | 598.2487 | 1769.996 | -0.0024 | -1.4  | 6.19 | 41827.5  | 7     | HUMAN | BT2749 | Phosphoglycerate kinase                                      |
| 5244 | dirMS_041712_NAR_40mM_plus.8996.8996.3     | 3 | 12.96 | 0 | 4.93E+04       | (KJVSQVKA)KJ V/Q/V/S/G D S H T A L D T G R/V    | 105.17 | 633.6448 | 1898.92  | -0.0004 | -0.2  | 4.41 | 29854.8  | 9.49  | HUMAN | CJ380  | Regulator of chromatin condensation (Fragment)               |
| 5245 | dirMS_041712_NAR_50mM_plus.15503.15503.3   | 3 | 12.96 | 1 | 7.67E+05       | (KJVGQGA)KJ V/G/G/A/E D S Q L V A G V A F K/T   | 150.35 | 639.6848 | 1917.044 | -0.0042 | -2.2  | 6.04 | 46550.7  | 7.81  | HUMAN | BT2C9  | Chaperonin containing TCP1, subunit 7 (Eta), isoform CRA_a   |
| 5246 | dirMS_041712_NAR_50mM_plus.9324.9324.3     | 3 | 12.96 | 1 | 1.02E+06       | (KJTVACDQ)KJTA V I/V/D/P/R/P R/G K              | 116.6  | 442.9121 | 1326.72  | 0.0019  | 1.4   | 8.41 | 50199.4  | 4.75  | HUMAN | AGN222 | Tubulin beta-8 chain-like protein LOC260334                  |
| 5247 | dirMS_041712_NAR_60mM_plus.13021.13064.3   | 3 | 12.96 | 1 | 2.54E+05       | (RIVGAM)RIV G/A/M/Q/V/V/S/D/R R/K               | 124.97 | 488.2643 | 1465.783 | -0.0046 | -3.3  | 8.56 | 144109.9 | 6.01  | HUMAN | J3K887 | Citruhin heavy chain 2                                       |
| 5248 | dirMS_041712_NAR_60mM_plus.16385.16403.3   | 3 | 12.96 | 1 | 5.36E+05       | (RIVTFRTR)RIV T/F/R/T R T E I/V/L/A/T A/R       | 124.83 | 528.653  | 1583.948 | -0.0035 | -2.2  | 9.57 | 13054.7  | 9.59  | HUMAN | EP9P4A | 40S ribosomal protein S3                                     |
| 5249 | dirMS_041712_NAR_60mM_plus.16642.16642.3   | 3 | 12.96 | 1 | 6.93E+05       | (RSTNNGR)RIS T N K E T A V/T/F/T/P/T G L K/Q    | 144.48 | 616.3117 | 1846.933 | -0.0128 | -7    | 9.7  | 73202    | 1.91  | HUMAN | CJ9M5U | Probable ATP-dependent RNA helicase DDX17                    |
| 5250 | dirMS_041712_NAR_60mM_plus.6403.6422.3     | 3 | 12.96 | 1 | 4.82E+05       | (KJITAPNO)KJ I/A/P/N/A P R D E/S R/G            | 92.2   | 485.5161 | 1454.735 | -0.0044 | -3    | 5.73 | 53030.7  | 11.13 | HUMAN | EP9A7  | Bcl-2-associated transcription factor 1                      |
| 5251 | dirMS_041712_NAR_60mM_plus.6930.6947.3     | 3 | 12.96 | 1 | 3.73E+05       | (KJGDGCK)KJG D/G/I/G/C/V/N/K K/K                | 94.72  | 540.5114 | 1199.518 | 0.0013  | 1.1   | 6.07 | 69388.6  | 5.11  | HUMAN | AI9A10 | Prospasin                                                    |
| 5252 | dirMS_041712_NAR_120mM_minus.2430.24143.3  | 3 | 12.96 | 0 | 8.12E+05       | (RILHFRPL)RIL H F M L/P/V/L/S/R S/R/G           | 182.17 | 540.9407 | 1620.835 | -0.0001 | -0.6  | 9.75 | 42230.8  | 4.77  | HUMAN | AGN208 | Transitional endoplasmic reticulum ATPase                    |
| 5253 | dirMS_041712_NAR_20mM_minus.7646.7646.2    | 2 | 12.95 | 0 | 7.13E+05 M233m | (KJVEVDQK)KJ E V/D/E Q L N/V/I/Q/N/K/N          | 125.03 | 731.843  | 1446.689 | 15.9894 | -3.8  | 4.14 | 40069.4  | 4.83  | HUMAN | FEV1R1 | Tubulin beta chain                                           |
| 5254 | dirMS_041712_NAR_30mM_minus.10784.12113.2  | 2 | 12.95 | 0 | 2.51E+06       | (RITSASIR)RIS I/S/A/S/V/L/R/S/G                 | 112.08 | 430.7619 | 860.52   | -0.0034 | -4    | 9.41 | 44227.3  | 7.81  | HUMAN | FE706E | T-complex protein 1 subunit alpha                            |
| 5255 | dirMS_041712_NAR_30mM_minus.15806.15806.2  | 2 | 12.95 | 0 | 1.25E+05       | (RITNVEIR)RIT I/N E I/V/N/A/L/T R/Q             | 139.6  | 715.3834 | 1429.765 | -0.0005 | -3.5  | 4.53 | 107710.1 | 5.38  | HUMAN | BT7Y16 | Actinin alpha 1 isoform 3                                    |
| 5256 | dirMS_041712_NAR_30mM_plus.9632.9632.2     | 2 | 12.95 | 0 | 9.57E+05       | (KJISFPR)KJ I S/F/P/R A I/S/V/S/V/S/V/S         | 107.35 | 493.761  | 1165.938 | -0.0002 | -0.6  | 4.34 | 29162.5  | 4.75  | HUMAN | PE1425 | Mitogen-activated protein kinase 2                           |
| 5257 | dirMS_041712_NAR_50mM_minus.7420.7420.3    | 3 | 12.95 | 1 | 8.03E+04       | (RJIYVEAK)RJI Y A E A K A/P/L/R/L               | 109.27 | 451.2571 | 1351.758 | -0.0012 | -0.9  | 6.04 | 96306.4  | 6.41  | HUMAN | P13109 | Elongation factor 2                                          |
| 5258 | dirMS_041712_NAR_50mM_minus.9173.9713.3    | 3 | 12.95 | 1 | 7.87E+04       | (RJIYVGEIR)RJI Y V/G/E A/D/Q/G S L V A/P D R/L  | 123.27 | 581.2998 | 1741.908 | -0.0021 | -13.2 | 4.56 | 30427.2  | 7.21  | HUMAN | HB8PQ  | Alanine-tRNA ligase, cytoplasmic (Fragment)                  |
| 5259 | dirMS_041712_NAR_20mM_plus.15171.15711.2   | 2 | 12.95 | 1 | 3.01E+05       | (KJILGGLA)KJ I L/G/L/C/G L A E R L              | 176.75 | 522.7971 | 1044.587 | -0.0001 | -0.1  | 6    | 12647.2  | 8.07  | HUMAN | PI4174 | Macrophage migration inhibitory factor                       |
| 5260 | dirMS_041712_NAR_20mM_plus.1895.18952.2    | 2 | 12.95 | 0 | 3.96E+06       | (RIVTFRTR)RIV T/F/R/T R T E I/V/L/A/T A/R       | 124.83 | 528.653  | 1583.948 | -0.0035 | -2.2  | 9.57 | 13054.7  | 9.59  | HUMAN | EP9P4A | 40S ribosomal protein S3                                     |
| 5261 | dirMS_041712_NAR_20mM_plus.7066.7066.2     | 2 | 12.95 | 0 | 4.35E+05       | (RIDEAGTR)RIG A/G/T/E R V T V/K A               | 115.37 | 537.2946 | 1075.58  | -0.0018 | -1.7  | 4.53 | 31330.8  | 9.26  | HUMAN | EP9D8E | Malate dehydrogenase, mitochondrial                          |
| 5262 | dirMS_041712_NAR_30mM_plus.12605.12605.2   | 2 | 12.95 | 0 | 5.61E+05       | (KJNAGVEK)KJ N A/G/V/E/G S I V K/Q              | 118.43 | 608.3313 | 1215.658 | -0.0026 | -2.2  | 4.53 | 61224.7  | 5.7   | HUMAN | PI0809 | 60 kDa heat shock protein, mitochondrial                     |
| 5263 | dirMS_041712_NAR_30mM_plus.18907.19033.3   | 3 | 12.95 | 0 | 1.36E+05       | (KJIDGATK)KJ I D/G/A/T V A/G L N V/L/R          | 152.62 | 400.563  | 1199.674 | 0.0002  | 0.2   | 5.84 | 17973    | 5.16  | HUMAN | EP9E5  | Heat shock cognate 71 kDa protein (Fragment)                 |
| 5264 | dirMS_041712_NAR_30mM_plus.5531.5531.2     | 2 | 12.95 | 0 | 2.56E+05       | (RITPPMR)RIT P/P/M R M S R/T                    | 82.32  | 403.6975 | 802.388  | 0.0001  | 0.2   | 9.41 | 27441.6  | 6.68  | HUMAN | Q13556 | Eukaryotic translation initiation factor 4H                  |
| 5265 | dirMS_041712_NAR_50mM_plus.17302.17302.3   | 3 | 12.95 | 0 | 3.07E+05       | (RIDIQSPD)R I D I Q S/P L N/V/L/T C/D A K/Q     | 159.4  | 615.664  | 1844.979 | -0.0012 | -0.6  | 9.6  | 33925    | 5.63  | HUMAN | EB4045 | Mitogen-activated protein kinase 2                           |
| 5266 | dirMS_041712_NAR_60mM_plus.5645.5645.3     | 3 | 12.95 | 1 | 3.88E+04       | (RITLKEEK)RIT L/E/L/K/E/Q E A R L               | 87.77  | 454.555  | 1361.654 | -0.0039 | -2.8  | 4.32 | 95233.1  | 9.67  | HUMAN | QB9U08 | Probable ATP-dependent RNA helicase DDX23                    |
| 5267 | dirMS_041712_NAR_120mM_minus.15023.15067.4 | 4 | 12.94 | 1 | 3.11E+05       | (RJIALLSS)RJI A/L/L/S/A/V/D/H/G S D V E K F R/Q | 135.92 | 490.7539 | 1959.977 | 0.0167  | 8.5   | 4.75 | 57204.9  | 6.01  | HUMAN | FSGW6F | T-complex protein 1 subunit beta                             |
| 5268 | dirMS_041712_NAR_30mM_minus.13872.14047.2  | 2 | 12.94 | 0 | 3.82E+05       | (RILAGLRI)RIL A/G/L/R/V/G/E/R/Q                 | 129.28 | 524.2789 | 1047.558 | -0.0076 | -7.3  | 6    | 63988.1  | 7.83  | HUMAN | BT2009 | Hypoxia up-regulated protein 1                               |
| 5269 | dirMS_041712_NAR_30mM_plus.14842.14842.2   | 2 | 12.94 | 0 | 1.40E+05       | (RILGKPLR)RIL G K/P/L/R/V/L/V/V/G               | 134.55 | 612.854  | 1328.951 | -0.0029 | -1.1  | 3.37 | 11529.2  | 9.82  | HUMAN | FBW573 | Transitional endoplasmic reticulum ATPase                    |
| 5270 | dirMS_041712_NAR_30mM_plus.14882.14950.2   | 2 | 12.94 | 0 | 2.44E+05       | (KJLNFPR)KJ L N F/R M P/Q R/T                   | 134.87 | 597.8249 | 1194.648 | -0.0052 | -4.3  | 4.37 | 83605    | 4.97  | HUMAN | PO2328 | Heat shock protein HSP 90-beta                               |
| 5271 | dirMS_041712_NAR_40mM_minus.12223.12223.3  | 3 | 12.94 | 0 | 4.74E+05       | (KJIALVTR)KJ I A/L/V/T/C/P F S R/K              | 155.73 | 537.6382 | 1610.898 | 0.0026  | 1.6   | 8.59 | 49982    | 5.86  | HUMAN | BDYD08 | T-complex protein 1 subunit epsilon                          |
| 5272 | dirMS_041712_NAR_60mM_minus.15488.15602.3  | 3 | 12.94 | 1 | 1.72E+05       | (RIGRPLLR)RIG R/L/P/L/V/L/V/C/D/Y K/Q           | 146.87 | 468.9273 | 1044.767 | 0.0006  | 0.4   | 8.59 | 533778   | 5.74  | HUMAN | Q15149 | Plectin                                                      |
| 5273 | dirMS_041712_NAR_120mM_plus.10140.10195.3  | 3 | 12.94 | 0 | 1.61E+06       | (RIGGCLPR)RIG G C/L/P/R/P/S/C/N/R               | 108.33 | 410.8589 | 1238.551 | -0.0127 | -10.3 | 9.75 | 14391.8  | 4.99  | HUMAN | Q41461 | Creative kinase B-type (Fragment)                            |
| 5274 | dirMS_041712_NAR_120mM_plus.18142.18168.3  | 3 | 12.94 | 1 | 1.16E+06       | (KJARAEPD)KJ A R/A/P/D/I/L F/E/N/R/K            | 147.75 | 422.22   | 1264.643 | 0.0022  | 1.7   | 6.07 | 85057.6  | 4.94  | HUMAN | PT9700 | Heat shock protein HSP 90-alpha                              |
| 5275 | dirMS_041712_NAR_120mM_plus.4312.4401.3    | 3 | 12.94 | 1 | 3.08E+05       | (KJAGADE)KJ A/G/A/D/E/E R A/E/T A/R             | 71.55  | 425.869  | 1275.592 | 0.0001  | 0.1   | 4.41 | 57204.9  | 6.01  | HUMAN | FSGW6F | T-complex protein 1 subunit beta                             |
| 5276 | dirMS_041712_NAR_40mM_plus.12295.12397.3   | 3 | 12.94 | 0 | 3.16E+05       | (KJAAASDA)KJ A A/S/D A I/V/M/T P L P P H R/L    | 139.5  | 607.3167 | 1819.937 | -0.0115 | -0.9  | 5.32 | 12926.1  | 4.4   | HUMAN | KEW20  | 14-3-3 protein epsilon (Fragment)                            |
| 5277 | dirMS_041712_NAR_40mM_plus.14012.14012.3   | 3 | 12.94 | 1 | 8.79E+04       | (RISGILIE)RIS G I/L/E/L/E L/T/P S L V/P V K/R   | 148.73 | 566.6552 | 1097.968 | -0.0173 | -10.2 | 5.86 | 34828    | 9.96  | HUMAN | FHS544 | Serine/threonine protein phosphatase 1 regulatory subunit 10 |
| 5278 | dirMS_041712_NAR_40mM_plus.17182.17862.2   | 2 | 12.94 | 0 | 2.20E+06       | (KJHAGVDR)KJ H A/G/V/D/R/V/S/V/S/V/S            | 302.77 | 481.232  | 965.469  | 0.0016  | -1.6  | 4.37 | 3773.3   | 5.39  | HUMAN | FBV09  | Keratin, type II cytoskeletal 8                              |
| 5279 | dirMS_041712_NAR_40mM_plus.7774.7774.2     | 2 | 12.94 | 0 | 1.91E+04       | (RISGFDTR)RIS E/G I/F/D/Y T/R K                 | 105.63 | 487.7152 | 974.211  | 0.0017  | 1.8   | 4.37 | 29110.6  | 4.57  | HUMAN | PI2004 | Proliferating cell nuclear antigen                           |
| 5280 | dirMS_041712_NAR_50mM_plus.6151.6151.3     | 3 | 12.94 | 1 | 1.12E+05       | (RISVSSIC)RIS V/S/S/E E Q K T E G A E K/Q       | 96.75  | 502.2651 | 1504.785 | -0.0046 | -3    | 4.79 | 8491.4   | 6.28  | HUMAN | ESR18A | 14-3-3 protein zeta/delta (Fragment)                         |
| 5281 | dirMS_041712_NAR_60mM_plus.15605.15605.2   | 2 | 12.94 | 1 | 4.11E+05       | (RITEMET)RIT E/M/N/E/F V/L/I K R/Q              | 138.27 | 740.8875 | 1480.772 | -0.0039 | -2.6  | 4.78 | 13588.1  | 4.66  | HUMAN | FBV67F | Keratin, type II cytoskeletal 8 (Fragment)                   |
| 5282 | dirMS_041712_NAR_60mM_plus.7480.7480.3     | 3 | 12.94 | 1 | 9.98E+05       | (KJISFPR)KJ I S/F/P/R A I/S/V/S/V/S/V/S         | 107.35 | 493.761  | 1165.938 | -0.0002 | -0.6  | 4.34 | 29162.5  | 4.75  | HUMAN | BD4731 | Far-upstream element-binding protein 2                       |
| 5283 | dir                                        |   |       |   |                |                                                 |        |          |          |         |       |      |          |       |       |        |                                                              |

|      |                                           |   |       |   |                |                                                       |        |          |          |         |       |      |          |       |       |        |                                                                                                |
|------|-------------------------------------------|---|-------|---|----------------|-------------------------------------------------------|--------|----------|----------|---------|-------|------|----------|-------|-------|--------|------------------------------------------------------------------------------------------------|
| 5337 | dirMS_041712_NAR_60mM_plus.12408.12644.3  | 3 | 12.9  | 1 | 3.85E+06       | (KILFNLKSK(K)Q/LP/N/L/S K/E D/DV/R(Q))                | 121.6  | 445.9046 | 1335.69  | 0.0089  | 6.7   | 4.56 | 25082    | 11.29 | HUMAN | AZ3A85 | 40S ribosomal protein S6                                                                       |
| 5338 | dirMS_041712_NAR_60mM_plus.16280.16362.3  | 3 | 12.9  | 1 | 1.84E+05       | (KIKYDFP(K)K/A P D V I V I T /N/P R(L))               | 141.8  | 437.3685 | 1310.689 | 0.0118  | 1.3   | 8.59 | 71218.8  | 6.3   | HUMAN | AYN18  | Radixin                                                                                        |
| 5339 | dirMS_041712_NAR_120mM_plus.5002.5001.2   | 3 | 12.9  | 1 | 5.37E+05       | (RIJAAEED(R)A/E/L A/L A/T T L V K/R(Q))               | 141.25 | 457.8793 | 1314.742 | -0.0029 | -2.2  | 6.85 | 50392.7  | 9.33  | HUMAN | P3262  | Pharynx myosin                                                                                 |
| 5340 | dirMS_041712_NAR_20mM_minus.10390.10390.2 | 3 | 12.89 | 0 | 1.44E+05       | (KIVYDVM(R)N/V/L/V P/V D/V/S E/R R(A))                | 152.93 | 617.2616 | 1233.647 | -0.0015 | -9.3  | 4.37 | 39066    | 6.61  | HUMAN | AP7W59 | Selenium binding protein 1 (Fragment)                                                          |
| 5341 | dirMS_041712_NAR_20mM_minus.14902.15234.2 | 3 | 12.89 | 0 | 1.56E+06       | (RIQIVND(R)I/Q/T/V/N/D O/L/P/V R(Q))                  | 132.22 | 606.3404 | 1211.674 | -0.0007 | -0.6  | 5.84 | 22062.7  | 5.66  | HUMAN | P32119 | Peroxodoxin-2                                                                                  |
| 5342 | dirMS_041712_NAR_50mM_plus.13010.13010.3  | 3 | 12.89 | 0 | 0.33E+05       | (RIETIIDLQ(R)E/T/N L/D/S/L P/L V I/D T H S(K R))      | 142.25 | 556.9259 | 1668.844 | 0.0021  | 0.1   | 4.53 | 53707.8  | 5.06  | HUMAN | P08870 | Vimentin                                                                                       |
| 5343 | dirMS_041712_NAR_50mM_plus.15375.15375.2  | 3 | 12.89 | 0 | 4.02E+05       | (RIEHALIA(R)R/I/A/L/A/T T L V K/R(Q))                 | 144.65 | 657.8793 | 1314.742 | -0.0029 | -2.2  | 6.85 | 50392.7  | 9.33  | HUMAN | P3262  | Pharynx myosin                                                                                 |
| 5344 | dirMS_041712_NAR_20mM_plus.15974.15974.2  | 3 | 12.89 | 0 | 2.84E+05 M337M | (KISFYPEK(V)S F I/P/E E S S V M V L/T K(M))           | 181.2  | 816.8988 | 1616.788 | 0.0027  | 4.8   | 4.53 | 17973    | 5.16  | HUMAN | EP905  | Heat shock cognate 71 kDa protein (Fragment)                                                   |
| 5345 | dirMS_041712_NAR_30mM_plus.13210.13443.2  | 3 | 12.89 | 0 | 1.01E+06       | (KILYDVID(K)Y/L/D/I/D/D/V/A/K(R))                     | 122    | 468.7614 | 936.504  | 0.0118  | 12.7  | 4.21 | 22029.9  | 10.62 | HUMAN | AMBUS3 | 60S ribosomal protein L23a                                                                     |
| 5346 | dirMS_041712_NAR_50mM_plus.17372.17299.3  | 3 | 12.89 | 0 | 0.61E+05       | (KIVLISS(L)K/L/L/S/A/L/D/C L/V/G/E S K(S))            | 159.32 | 600.3189 | 1798.937 | 0.0054  | 3     | 5.32 | 52440.1  | 6     | HUMAN | FRWJ3  | Clammin and polyadenylation-specificity factor subunit 6                                       |
| 5347 | dirMS_041712_NAR_50mM_plus.21497.21497.3  | 3 | 12.89 | 0 | 1.97E+05       | (RIULALEV(R)R/U/L/A/L/E/V/L/S Q/R(R))                 | 183.25 | 461.6293 | 1382.873 | 0.0004  | 0.3   | 8.75 | 280326.9 | 5.48  | HUMAN | Q75369 | Flamin-8                                                                                       |
| 5348 | dirMS_041712_NAR_50mM_plus.28350.8350.3   | 3 | 12.89 | 0 | 3.40E+05       | (RIIVAAEV(R)A/V/L/A/L/E/V/L/S Q/R(R))                 | 110.53 | 431.286  | 913.175  | -0.0036 | -2.7  | 6.04 | 90306.4  | 6.14  | HUMAN | P13692 | F-actin elongation factor 2                                                                    |
| 5349 | dirMS_041712_NAR_60mM_plus.13667.13715.3  | 3 | 12.89 | 0 | 1.59E+05       | (RIFKFSQK(R)F K/I/P S Q/I/P/I/S/G M R(G))             | 128.83 | 468.2401 | 1402.715 | -0.009  | -6.4  | 8.75 | 51636.5  | 8.68  | HUMAN | E7L233 | Rab GDP dissociation inhibitor beta                                                            |
| 5350 | dirMS_041712_NAR_60mM_plus.7108.7139.3    | 3 | 12.89 | 0 | 1.452E+05      | (KIAADIDQ(K)A/I/D/A/D/Q/E V K/E(R/A))                 | 95.48  | 425.2176 | 1273.638 | 0       | 0     | 4.32 | 138084.9 | 5.52  | HUMAN | Q86V96 | Cullin-associated NEDD8-dissociated protein 1                                                  |
| 5351 | dirMS_041712_NAR_20mM_minus.14681.14681.3 | 3 | 12.88 | 0 | 0.36E+05       | (KILVALLE(K)I A/V/E A/V/S/S/D/D/D/L/A G R(Y))         | 201.3  | 529.6163 | 1586.838 | -0.0041 | -2.6  | 4.03 | 24286.7  | 4.89  | HUMAN | G3V4N7 | Creatine kinase B-type (Fragment)                                                              |
| 5352 | dirMS_041712_NAR_60mM_plus.16891.16892.2  | 3 | 12.88 | 0 | 2.21E+05       | (KIFAFRR(K)F A/I/N/P/P/S/V A R(G))                    | 146.33 | 545.291  | 1098.584 | -0.0039 | -3.5  | 8.75 | 61363    | 6.73  | HUMAN | C9C059 | Propionyl-CoA carboxylase beta chain, mitochondrial                                            |
| 5353 | dirMS_041712_NAR_60mM_plus.18361.18361.3  | 3 | 12.88 | 0 | 1.480E+05      | (KILNALLI(K)T Q/L/N/L/L/D/L/D/S R(Q))                 | 163.37 | 442.9403 | 1326.81  | -0.004  | -3    | 8.41 | 150202.8 | 9.1   | HUMAN | E7EW20 | Unconventional myosin-V                                                                        |
| 5354 | dirMS_041712_NAR_20mM_plus.10509.10509.2  | 3 | 12.88 | 0 | 6.67E+04 M50S  | (RIJLDEEA(R)R/L/D/E/E I R(V))                         | 145.4  | 589.309  | 974.515  | 203.954 | 13.6  | 4.14 | 37784.1  | 8.78  | HUMAN | Q6P8U8 | Protein quaking                                                                                |
| 5355 | dirMS_041712_NAR_20mM_plus.11502.11503.2  | 3 | 12.88 | 0 | 1.17E+06       | (KIDWAA(K)Q V/I/N/A/I/A/T I K(T))                     | 151.15 | 508.292  | 1015.578 | -0.0015 | -1.5  | 5.84 | 58642    | 4.95  | HUMAN | F5H5D3 | Tubulin alpha-1C chain                                                                         |
| 5356 | dirMS_041712_NAR_20mM_plus.19255.19255.2  | 3 | 12.88 | 0 | 1.70E+04       | (RIJLAAGG(R)A/L/A/E/G G/A/P E I/L A L(R))             | 203.82 | 775.9467 | 1550.89  | -0.0039 | -2.5  | 4.53 | 42755    | 7.81  | HUMAN | 87274  | T-complex protein 1 subunit delta                                                              |
| 5357 | dirMS_041712_NAR_20mM_plus.7710.7710.2    | 3 | 12.88 | 0 | 4.28E+04       | (KIVATCEK(K)A/V T A/Q/G/A L/S/E N E R(N))             | 122.83 | 766.8616 | 1532.719 | -0.0028 | -1.8  | 4.09 | 17219.2  | 5.69  | HUMAN | EP9315 | 14-3-3 protein theta (Fragment)                                                                |
| 5358 | dirMS_041712_NAR_30mM_plus.10423.10423.2  | 3 | 12.88 | 0 | 5.36E+04       | (KIVTACDE(K)I/T A/V Q I/D P P R(Q))                   | 108.98 | 514.7643 | 1028.519 | 0.0002  | 1.9   | 5.5  | 50199.4  | 4.75  | HUMAN | AMBNN2 | Tubulin beta-8 chain-like protein LOC10260334                                                  |
| 5359 | dirMS_041712_NAR_30mM_plus.11978.11978.2  | 3 | 12.88 | 0 | 4.31E+05       | (KIVAGAG(K)A/Y/G G A/Y D V/M/S S K(H))                | 115.77 | 624.8176 | 1248.556 | 0.0006  | 0.5   | 5.88 | 61363    | 8.73  | HUMAN | C9C059 | Propionyl-CoA carboxylase beta chain, mitochondrial                                            |
| 5360 | dirMS_041712_NAR_50mM_plus.8298.8298.3    | 3 | 12.88 | 0 | 9.05E+04       | (KIQSDAG(K)Q/Q/V/G/S A/S/D/S/N/P I D V S R(L))        | 110.42 | 586.971  | 1758.898 | 0.0004  | 0.2   | 5.96 | 34657.3  | 8.91  | HUMAN | Q12004 | Aminocacyl tRNA synthase complex-interacting multifunctional protein                           |
| 5361 | dirMS_041712_NAR_60mM_plus.6776.6776.3    | 3 | 12.88 | 0 | 1.47E+05       | (KIQTAM(K)T/Q/L/M/I/S/L/D V R(Q))                     | 93.58  | 416.5533 | 1247.641 | 0.0001  | 0.3   | 8.41 | 470342.8 | 6.83  | HUMAN | E7LQ10 | LOC-dependent protein kinase catalytic subunit                                                 |
| 5362 | dirMS_041712_NAR_20mM_minus.10794.10794.2 | 3 | 12.87 | 0 | 0.65E+04       | (KIVNQGK(K)N/Q/L/Q/S/V/I/T E L/Q A C(K L))            | 155.45 | 817.4099 | 1633.821 | -0.0089 | -5.4  | 5.97 | 47328.4  | 7.76  | HUMAN | P13929 | Beta-enolase                                                                                   |
| 5363 | dirMS_041712_NAR_30mM_minus.16099.16099.2 | 3 | 12.87 | 0 | 1.48E+05       | (KIVYLSQI(R)R/V/L/V/S Q/V D E L(Q C))                 | 141.37 | 575.3113 | 1149.615 | 0.0003  | 0.3   | 4.37 | 41053.3  | 5.58  | HUMAN | Q86U10 | TNDC5 protein                                                                                  |
| 5364 | dirMS_041712_NAR_30mM_minus.7392.7393.2   | 3 | 12.87 | 0 | 2.50E+03       | (RIPTPEYE(R)I/P/E I/L/V/P/Y S A V(K))                 | 93.4   | 575.7705 | 1150.526 | 0.0075  | 6.5   | 4.25 | 21580.5  | 5.38  | HUMAN | BK025  | NIG(N)-dimethylarginine dimethylaminohydrolase 1                                               |
| 5365 | dirMS_041712_NAR_40mM_plus.1286.1286.2    | 3 | 12.87 | 0 | 5.98E+05       | (KILQHEAE(K)Q/M L/Q/V/L/V/V/V D/P Q(D K))             | 117.7  | 624.8176 | 1248.556 | -0.0011 | -1.1  | 6.17 | 68126.7  | 6.17  | HUMAN | Q86U10 | ATP-binding nuclear protein Ran                                                                |
| 5366 | dirMS_041712_NAR_40mM_plus.2988.7988.3    | 3 | 12.87 | 0 | 1.24E+05 M147M | (KILQHEAE(K)Q/M L/Q/V/L/V/V/V D/P Q(D K))             | 127.3  | 545.627  | 1618.873 | 15.9931 | -11.1 | 6.75 | 20859.5  | 4.85  | HUMAN | J4K520 | Eukaryotic initiation factor 4A1 (Fragment)                                                    |
| 5367 | dirMS_041712_NAR_50mM_minus.13284.13284.3 | 3 | 12.87 | 0 | 1.68E+05       | (KIMJLDAE(K)M L/D A/E D/V/V/G T A R P D/E K(I))       | 143.55 | 587.2884 | 1759.853 | 0.0006  | 0.3   | 4.1  | 107710.1 | 5.38  | HUMAN | B77Y16 | Actinin alpha 1 isoform 3                                                                      |
| 5368 | dirMS_041712_NAR_50mM_plus.14792.14792.3  | 3 | 12.87 | 0 | 0.40E+05       | (KIPYRHEI(K)P L/D A/E G I/L/T/N/W/D/D I M E(K I))     | 154.27 | 546.3084 | 1960.911 | -0.0003 | -0.1  | 4.31 | 32616.5  | 5.18  | HUMAN | AMN176 | Actin, alpha skeletal muscle                                                                   |
| 5369 | dirMS_041712_NAR_50mM_plus.1501.1501.3    | 3 | 12.87 | 0 | 1.26E+05       | (RIJLAEAE(K)R/A/E/L A/L A/T T L V K/R(Q))             | 152.47 | 657.8793 | 1314.742 | -0.0029 | -2.2  | 6.85 | 50392.7  | 9.33  | HUMAN | AMN176 | Actin, alpha skeletal muscle                                                                   |
| 5370 | dirMS_041712_NAR_20mM_plus.11124.11124.2  | 3 | 12.87 | 0 | 1.26E+05       | (KIVTPEYK(K)I V I/V/T A/E T K(Q))                     | 148.35 | 468.7674 | 936.54   | -0.0125 | -13.4 | 5.66 | 61018.6  | 9.44  | HUMAN | B0D1W8 | Probable ATP-dependent RNA helicase DDX5                                                       |
| 5371 | dirMS_041712_NAR_20mM_plus.14572.14572.2  | 3 | 12.87 | 0 | 2.38E+05       | (KIVSTLPA(R)M/V/L/P A I T L K(L))                     | 172.35 | 521.8283 | 1042.651 | -0.0013 | -1.3  | 8.77 | 20599.3  | 9.19  | HUMAN | H7C1V0 | Cathepsin D light chain (Fragment)                                                             |
| 5372 | dirMS_041712_NAR_20mM_plus.14767.14787.2  | 3 | 12.87 | 0 | 0.63E+04       | (RIJIMTFS(R)I M I/N I/T/S/S/V/N/V/S P K(V))           | 173.77 | 660.3527 | 1319.703 | -0.0047 | -3.5  | 8.75 | 42831.5  | 4.86  | HUMAN | AK854  | HCG1983504, isoform CRA_1                                                                      |
| 5373 | dirMS_041712_NAR_20mM_plus.22891.22893.2  | 3 | 12.87 | 0 | 1.70E+06       | (RIJNPFDR(K)R/L/P/I/D I/T M V R(Q))                   | 180.48 | 584.2953 | 1167.583 | 0       | 0     | 5.84 | 77799.7  | 9.09  | HUMAN | PS2272 | Heterogeneous nuclear ribonucleoprotein M                                                      |
| 5374 | dirMS_041712_NAR_40mM_plus.6380.6380.2    | 3 | 12.87 | 0 | 8.95E+04       | (RIJTDAL(R)W/T/D A L N A/T T R(A))                    | 96.72  | 480.7504 | 960.511  | 0.0006  | 0.7   | 5.81 | 63234.7  | 6.10  | HUMAN | P10809 | 60 kDa heat shock protein, mitochondrial                                                       |
| 5375 | dirMS_041712_NAR_50mM_plus.16488.16489.3  | 3 | 12.87 | 0 | 0.57E+05       | (RIQVQGE(K)R/V/Q/G/L S/E/T/L E A/L(R/N))              | 154.53 | 614.9984 | 1842.971 | 0.0098  | 5.3   | 5.4  | 81934.1  | 6.08  | HUMAN | P33993 | DNA replication licensing factor MCM7                                                          |
| 5376 | dirMS_041712_NAR_30mM_minus.14663.14789.2 | 3 | 12.86 | 0 | 3.15E+05       | (KIVPMQEI(K)M/V/M/E/E F S R(Q))                       | 133.63 | 586.7762 | 1172.541 | 0.0047  | 4     | 4.53 | 53681.8  | 6.42  | HUMAN | G5EAS2 | Protein disulfide isomerase family A, member 3, isoform CRA_b                                  |
| 5377 | dirMS_041712_NAR_30mM_minus.18300.18300.2 | 3 | 12.86 | 0 | 2.25E+05       | (KILQRELE(K)A L/Q I/Q/L/E D V R(Q))                   | 153.85 | 538.7985 | 1076.599 | -0.0089 | -8.3  | 4.53 | 55233    | 6.02  | HUMAN | B4D91F | T-complex protein 1 subunit zeta                                                               |
| 5378 | dirMS_041712_NAR_40mM_plus.5866.5866.2    | 3 | 12.86 | 0 | 1.70E+05 M369M | (KIVYLSQI(R)R/V/L/V/S Q/V D E L(Q C))                 | 173.15 | 575.3113 | 1149.615 | -0.0003 | -0.3  | 4.37 | 41053.3  | 5.58  | HUMAN | B17C91 | Fatty acid synthase                                                                            |
| 5379 | dirMS_041712_NAR_50mM_plus.14500.14900.3  | 3 | 12.86 | 0 | 1.27E+05       | (KIVNYLVE(K)Q/M L/Q/V/L/V/V/V D/P Q(K R))             | 152.62 | 577.3116 | 1729.293 | -0.0029 | -1.7  | 6.07 | 64002.5  | 6.4   | HUMAN | AIAC7  | X-ray repair complementing defective repair in Chinese hamster cells 6 (Ku autoantigen, 70kDa) |
| 5380 | dirMS_041712_NAR_60mM_plus.6907.6907.3    | 3 | 12.86 | 0 | 1.61E+04       | (KIVSGDRG(R)S V/R G/D S V I/S/D/S/G S A/L R(S))       | 97.03  | 561.916  | 1680.742 | -0.0085 | -5.1  | 4.14 | 50974.6  | 5.31  | HUMAN | BSM5E1 | Programmed cell death protein 4                                                                |
| 5381 | dirMS_041712_NAR_120mM_plus.8191.8191.3   | 3 | 12.86 | 0 | 1.27E+06       | (RIJAAAGE(R)A/P/G A/E F A P N K(R))                   | 96.73  | 410.2916 | 1228.643 | 0.001   | 0.8   | 8.79 | 43979.5  | 8.92  | HUMAN | FS0723 | Non-POU domain-containing octamer-binding protein                                              |
| 5382 | dirMS_041712_NAR_20mM_plus.10454.10454.2  | 3 | 12.86 | 0 | 1.53E+05 M267M | (RIJLUELE(K)R/L/T/L/I/E E I/N H R(Q))                 | 145.17 | 614.8176 | 1248.556 | -0.0091 | -3.4  | 4.25 | 51524.1  | 4.42  | HUMAN | F5H5D3 | Protein disulfide-isomerase                                                                    |
| 5383 | dirMS_041712_NAR_20mM_plus.12279.12279.2  | 3 | 12.86 | 0 | 1.17E+05       | (KIVNQGK(K)N/Q/L/Q/S/V/I/T E L/Q A C(K L))            | 155.45 | 817.4114 | 1633.821 | -0.0059 | -3.6  | 5.97 | 47328.4  | 7.76  | HUMAN | P13929 | Beta-enolase                                                                                   |
| 5384 | dirMS_041712_NAR_20mM_plus.13914.13914.2  | 3 | 12.86 | 0 | 6.90E+04       | (KILDLVLC(K)L L/D/L/V/Q/Q/S/C N I R(Q))               | 167.73 | 740.8757 | 1480.746 | -0.0023 | -1.6  | 5.83 | 14855.1  | 9.26  | HUMAN | BIAND1 | NHP2 non-histone chromosome protein 2-like 1 (S. cerevisiae)                                   |
| 5385 | dirMS_041712_NAR_20mM_plus.15503.15607.2  | 3 | 12.86 | 0 | 3.47E+05       | (KIVNLYAG(K)G V/I/N/Q/I/Q/P/T L V/V/G D L A K(R))     | 179.05 | 912.9952 | 1824.985 | -0.0023 | -4.3  | 5.18 | 49012.3  | 4.9   | HUMAN | AMBU15 | Tubulin alpha-4A chain                                                                         |
| 5386 | dirMS_041712_NAR_20mM_plus.18964.18964.2  | 3 | 12.86 | 0 | 5.05E+04       | (RIJNTALG(R)R/L/T/A/G/L/S L N L/V/V/S G G T A R(K A)) | 201.52 | 800.4534 | 1599.906 | -0.0069 | -11.3 | 8.75 | 60306    | 6.27  | HUMAN | EP9U10 | Phosphorylserine/aminimidazolecarboxamide formyltransferase                                    |
| 5387 | dirMS_041712_NAR_20mM_plus.10820.10820.2  | 3 | 12.86 | 0 | 1.02E+05       | (KIVLSPEAR(K)S I/L/V/L/S L I/L A E I(K))              | 110.4  | 426.2291 | 951.462  | -0.0027 | -1.6  | 6.14 | 62829.7  | 6.14  | HUMAN | EP9U10 | Epiplakin                                                                                      |
| 5388 | dirMS_041712_NAR_30mM_plus.17139.17139.2  | 3 | 12.86 | 0 | 5.18E+05 M255M | (RISLSDMS(R)S L/D/M D S V I/A L E/V K(A))             | 142.68 | 668.8384 | 1320.671 | 15.998  | 2.3   | 4.03 | 37296.3  | 5.3   | HUMAN | FBVU64 | Keratin, type II cytoskeletal 8                                                                |
| 5389 | dirMS_041712_NAR_30mM_plus.6198.6233.2    | 3 | 12.86 | 0 | 3.58E+05       | (KISPEQEI(K)S P/Q/E/L/A/R(K))                         | 86.92  | 465.2373 | 929.469  | -0.0104 | -1.5  | 4.53 | 36856.1  | 8.55  | HUMAN | HDYLA4 | Sorbitol dehydrogenase                                                                         |
| 5390 | dirMS_041712_NAR_40mM_plus.13073.13192.3  | 3 | 12.86 | 0 | 0.33E+05       | (KILQMEAR(K)Q/M L/Q/V/L/V/V/I V I/V T G P R(V))       | 144.07 | 540.2954 | 1618.873 | -0.0017 | -1.1  | 6.75 | 20859.5  | 4.85  | HUMAN | J4K525 | Eukaryotic initiation factor 4A1 (Fragment)                                                    |
| 5391 | dirMS_041712_NAR_40mM_plus.5866.5866.2    | 3 | 12.86 | 0 | 1.70E+05 M369M | (KIVYLSQI(R)R/V/L/V/S Q/V D E L(Q C))                 | 173.15 | 575.3113 | 1149.615 | -0.0003 | -0.3  |      |          |       |       |        |                                                                                                |



|      |                                           |   |          |   |          |                                                      |        |          |          |          |       |         |          |       |        |                                 |                                                                       |
|------|-------------------------------------------|---|----------|---|----------|------------------------------------------------------|--------|----------|----------|----------|-------|---------|----------|-------|--------|---------------------------------|-----------------------------------------------------------------------|
| 5555 | dirMS_041712_NAR_60mM_minus.5692.5789.2   | 2 | 12.73    | 1 | 4.42E+06 | (KIDSVGG(K)D/S YV/G D/E A Q/S K R/G)                 | 87.58  | 67.78144 | 1354.623 | -0.0018  | -1.3  | 4.56    | 32616.5  | 5.18  | HUMAN  | ANL676                          | Actin, alpha skeletal muscle                                          |
| 5556 | dirMS_041712_NAR_60mM_minus.7257.7461.3   | 3 | 12.73    | 1 | 6.21E+05 | M136m (KIVGEGM(K)K V/E G N V/V/E A M E/R/F)          | 100.3  | 531.25   | 1505.745 | 0.0104   | 0.4   | 4.79    | 18240.4  | 7.96  | HUMAN  | PE6237                          | Peptidyl-prolyl cis-trans isomerase A                                 |
| 5557 | dirMS_041712_NAR_120mM_plus.1247.13176.3  | 0 | 12.6E+05 | 0 | 1.32E+05 | (KIVYGGG(K)K V/E G N V/V/E A M A/Q/K)                | 7.3    | 8.6      | 14745.6  | 0.0019   | 7.3   | 8.6     | 23799.1  | 6.48  | HUMAN  | PE6237                          | Peptidyl-prolyl cis-trans isomerase B                                 |
| 5558 | dirMS_041712_NAR_120mM_plus.15413.15815.3 | 3 | 12.73    | 0 | 2.59E+06 | (KIVFVGG(K)K F/SV/E G/E E/R/A/R)                     | 135.42 | 558.258  | 1348.664 | -0.9004  | -1.2  | 5.4     | 85057.6  | 4.94  | HUMAN  | PT0700                          | Heat shock protein HSP 90-alpha                                       |
| 5559 | dirMS_041712_NAR_20mM_plus.12550.12550.2  | 2 | 12.73    | 0 | 1.91E+05 | (KIVMSNA(K)I)S/NV/S C/T/VN(L)A/P L A/K/V)            | 105.55 | 137.426  | 1833.92  | -0.0018  | -1    | 8.75    | 31718.5  | 7.17  | HUMAN  | E7U17A                          | Glyceraldehyde 3-phosphate dehydrogenase                              |
| 5560 | dirMS_041712_NAR_30mM_plus.10018.10319.2  | 2 | 12.73    | 0 | 1.51E+06 | (KIVGWNS(R)G V/N)N/S A/L/S D/R/R)                    | 159.73 | 451.7599 | 902.505  | -0.0109  | -12.1 | 9.75    | 65077.2  | 5.47  | HUMAN  | BZ7185                          | V-type proton ATPase catalytic subunit A                              |
| 5561 | dirMS_041712_NAR_30mM_plus.12094.12092.2  | 0 | 12.73    | 0 | 8.40E+05 | (KIVGGGG(K)F I/G I/G V/D/L V/R/R)                    | 155.32 | 473.7748 | 946.547  | -0.0246  | -4.6  | 9.75    | 47760.5  | 5.39  | HUMAN  | BZ7214                          | Eukaryotic protein chain release factor subunit 1                     |
| 5562 | dirMS_041712_NAR_40mM_plus.11033.11033.3  | 3 | 12.73    | 0 | 6.44E+04 | (KIVSLVA(K)S L/VN/E A V/H S F V D E K P K)           | 130.75 | 664.6419 | 1991.923 | -0.0121  | -1.1  | 4.25    | 54815.2  | 9.17  | HUMAN  | PT2656                          | Probable ATP-dependent RNA helicase DDX6                              |
| 5563 | dirMS_041712_NAR_50mM_plus.19000.19300.3  | 3 | 12.73    | 0 | 5.40E+05 | (KIVHLQAP(K) L) L Q/AAP L D O A/E)E L/Q/A/R/F)       | 169.5  | 644.3484 | 1931.035 | -0.0039  | -2    | 4.54    | 87447.6  | 6.44  | HUMAN  | Q15437                          | Protein transport protein Sec23B                                      |
| 5564 | dirMS_041712_NAR_50mM_plus.19865.19865.3  | 3 | 12.73    | 1 | 2.65E+05 | (KIVDVTG(K)K R D V T F/S)P A)I/V E N E L/K/F)        | 176.28 | 650.0048 | 1948.002 | -0.0024  | -1.2  | 4.32    | 8027.1   | 9.38  | HUMAN  | FT7206                          | Mesencephalic astrocyte-derived neurotrophic factor (Fragment)        |
| 5565 | dirMS_041712_NAR_50mM_plus.9284.9284.3    | 3 | 12.73    | 1 | 2.83E+05 | (KIVDTCV(K)K)U/T C V V M R P D A S A/R/K)            | 116.45 | 497.917  | 1491.729 | 0.0007   | -4.7  | 5.96    | 37486.1  | 8.03  | HUMAN  | PT2626                          | Heterogeneous nuclear ribonucleoprotein A2/B1                         |
| 5566 | dirMS_041712_NAR_50mM_plus.9473.9473.3    | 0 | 12.73    | 0 | 5.99E+05 | (KIVGAVG(K)K V)A/V L A/V D/L V/S R/R)                | 117.25 | 345.949  | 1493.702 | 0.0013   | 1     | 6.74    | 24590.2  | 6.74  | HUMAN  | PT4277                          | 6S ribosomal protein L5                                               |
| 5567 | dirMS_041712_NAR_50mM_plus.9474.9474.3    | 3 | 12.73    | 1 | 5.41E+05 | (KIVGLAA(K)G I)A/V A/D E S/T G S I A K R/L)          | 116.73 | 496.9389 | 1488.802 | 0.0005   | 0     | 6.07    | 30711.4  | 7.15  | HUMAN  | H3BP58                          | Fructose-bisphosphate aldolase A (Fragment)                           |
| 5568 | dirMS_041712_NAR_60mM_plus.12757.12757.3  | 3 | 12.73    | 1 | 9.60E+05 | M232m (KIVMSm(K)R)M S m K E V D E Q)M/L/V V/L G N(K) | 123.5  | 647.3021 | 1923.897 | -15.9945 | -0.2  | 4.68    | 40069.4  | 4.83  | HUMAN  | E7W191                          | Tubulin beta chain                                                    |
| 5569 | dirMS_041712_NAR_60mM_plus.16418.16544.3  | 3 | 12.73    | 1 | 3.69E+05 | (-MKMNSF(-)M K L N I S)P)A/T G/C Q/K/L)              | 142.85 | 532.2733 | 1594.808 | -0.0026  | -1.7  | 10      | 10471.9  | 5.4   | HUMAN  | AZ4387                          | 40S ribosomal protein S6                                              |
| 5570 | dirMS_041712_NAR_20mM_plus.12065.12065.2  | 2 | 12.72    | 0 | 7.40E+05 | M313m (KIVTQSL(R)T V)Q/L V/L/D)S M R(N)              | 170.25 | 761.207  | 1519.925 | -1.16    | 4.03  | 43773.3 | 5.26     | HUMAN | EV9219 | Keratin, type I cytoskeletal 18 |                                                                       |
| 5571 | dirMS_041712_NAR_40mM_minus.10721.10856.3 | 3 | 12.72    | 0 | 2.22E+05 | (KIVDSHSG(R)D L)S H G D A/V)I/S V/A/C/K/D)           | 147.08 | 528.9384 | 1584.805 | -0.0044  | -2.8  | 5.21    | 29110.6  | 4.57  | HUMAN  | PI2004                          | Proliferating cell nuclear antigen                                    |
| 5572 | dirMS_041712_NAR_40mM_minus.11259.11259.3 | 3 | 12.72    | 0 | 4.48E+04 | (KIVALEAE(R)E A)A/E/A/E A L S P R P A L(V/R/S)       | 149.25 | 598.3347 | 1792.992 | -0.002   | -1.1  | 4.79    | 22148.2  | 5.87  | HUMAN  | B3KV21                          | Na(+)/H(+) exchange regulator cofactor NHE-RF1                        |
| 5573 | dirMS_041712_NAR_50mM_minus.12299.12336.3 | 3 | 12.72    | 1 | 1.19E+05 | (KIVLEVTG(K)I)G I)E/V)T F Q S K N K L E T G K/S)     | 138.22 | 665.0228 | 1993.06  | -0.0062  | -3.1  | 6.14    | 28001.7  | 5.46  | HUMAN  | E7E111                          | AP-1 exchange regulator mu-2 (Fragment)                               |
| 5574 | dirMS_041712_NAR_50mM_minus.19856.19856.3 | 3 | 12.72    | 1 | 1.13E+06 | (KIVGGG(K)K E I)G P L N V)I/L A/V D T V R/R)         | 187.5  | 621.6941 | 1863.07  | -0.0021  | -1.1  | 6.07    | 15252.2  | 5.82  | HUMAN  | AN6V55                          | Peroleiodoxin 2, isoform CRA_a                                        |
| 5575 | dirMS_041712_NAR_50mM_minus.2494.2494.3   | 3 | 12.72    | 1 | 1.82E+05 | (KIVGSAE(R)E I)G S A/V G A/Q S L D E V Y V/V/K/S)    | 122.55 | 654.6559 | 1961.956 | -0.0032  | -1.6  | 5.4     | 20148.5  | 4.65  | HUMAN  | B4ZV14                          | Proteasome (Prosome, macropain) subunit, alpha type, 5, isoform CRA_c |
| 5576 | dirMS_041712_NAR_120mM_plus.8374.8384.3   | 3 | 12.72    | 1 | 5.02E+05 | (KIVREEE(R)R V E A)V)E I)E)I)D/S/R(V)                | 97.32  | 544.2277 | 1360.67  | -0.0018  | -1.3  | 4.25    | 73601.9  | 9.46  | HUMAN  | Q14978                          | Nucleolar and colled-body phosphoprotein 1                            |
| 5577 | dirMS_041712_NAR_20mM_plus.13968.13968.2  | 2 | 12.72    | 0 | 7.16E+04 | (KIVFLJCT(R)R L)I)C/T D V/A A R(G)                   | 168.13 | 583.3005 | 1165.603 | 0.0023   | 2     | 5.84    | 83400.6  | 6.82  | HUMAN  | Q92499                          | ATP-dependent RNA helicase DDX1                                       |
| 5578 | dirMS_041712_NAR_30mM_plus.12414.12414.2  | 2 | 12.72    | 0 | 6.65E+05 | (KIVGSSV(R)R)O)V/S)P/P T R(G)                        | 117.7  | 468.2629 | 995.521  | -0.0011  | -1.2  | 8.75    | 24161.9  | 5.27  | HUMAN  | RV9209                          | SAP domain-containing ribonucleoprotein                               |
| 5579 | dirMS_041712_NAR_30mM_plus.13416.13488.2  | 2 | 12.72    | 0 | 8.55E+05 | (KIVETLAK(R)E I)T)A)I/A S P/T M K)                   | 123.95 | 581.307  | 1161.618 | -0.0117  | -10   | 6.1     | 32616.5  | 5.18  | HUMAN  | ANL676                          | Actin, alpha skeletal muscle                                          |
| 5580 | dirMS_041712_NAR_30mM_plus.13466.13466.2  | 2 | 12.72    | 0 | 1.26E+06 | (KIVMYPAG(R)M V)P/V)M G G A G L/E/R(I)               | 123.2  | 594.797  | 1188.586 | 0.0003   | 0.3   | 5.75    | 77999.7  | 9.09  | HUMAN  | PS2272                          | Heterogeneous nuclear ribonucleoprotein M                             |
| 5581 | dirMS_041712_NAR_40mM_plus.18852.18852.3  | 3 | 12.72    | 0 | 6.10E+05 | (KIVLHLH(R)R Y) L H L P/R E)Y)P A T L R(R)           | 176.92 | 578.6565 | 1733.959 | -0.0035  | -2    | 5.32    | 19924.8  | 9.99  | HUMAN  | FMU211                          | 40S ribosomal protein S10                                             |
| 5582 | dirMS_041712_NAR_40mM_plus.2442.5442.2    | 2 | 12.72    | 0 | 2.74E+04 | (KIVYSGT(K)T)Y)G Q)S)T Y S R(G)                      | 88.83  | 531.7462 | 1062.485 | 0.0011   | 0.1   | 8.25    | 14693.3  | 4.69  | HUMAN  | C9159                           | 26S protease regulatory subunit 7 (Fragment)                          |
| 5583 | dirMS_041712_NAR_50mM_plus.13405.13405.3  | 3 | 12.72    | 0 | 1.74E+05 | (KIVGAVG(K)K V)A/V L A/V D/L V/S R/R)                | 117.25 | 345.949  | 1493.702 | 0.0013   | 1     | 6.74    | 24590.2  | 6.74  | HUMAN  | PT4277                          | 6S ribosomal protein L23                                              |
| 5584 | dirMS_041712_NAR_50mM_plus.15942.15942.3  | 3 | 12.72    | 1 | 1.41E+05 | (KIVTSGG(K)G V)G D)E I)E L K R(K)                    | 115.65 | 452.944  | 1356.81  | 0.0078   | 5.7   | 6.11    | 12899.6  | 6.59  | HUMAN  | E7V171                          | Programmed cell death protein 5                                       |
| 5585 | dirMS_041712_NAR_50mM_plus.27181.7181.3   | 3 | 12.72    | 0 | 1.04E+06 | (KIVAEATP(R)E A T N P P V)I)G E K/P K(K)             | 103.55 | 527.282  | 1579.833 | -0.0012  | -0.7  | 4.79    | 55361.8  | 6.42  | HUMAN  | G5EAS2                          | Protein disulfide isomerase family A, member 3, isoform CRA_b         |
| 5586 | dirMS_041712_NAR_50mM_plus.1702.17702.3   | 3 | 12.72    | 1 | 3.22E+05 | (KIVEDHLP(K)I)E)I)D V P D R P(R)                     | 149.01 | 646.9288 | 1338.774 | -0.0021  | -1.6  | 4.56    | 49012.3  | 4.9   | HUMAN  | ABM181                          | Tubulin alpha-4A chain                                                |
| 5587 | dirMS_041712_NAR_20mM_plus.15467.15467.3  | 3 | 12.71    | 1 | 2.31E+05 | (KIVAAEA(R)E A)A/E/A/E A L S P R P A L(V/R/S)        | 149.25 | 598.3347 | 1792.992 | -0.002   | -1.1  | 4.79    | 22148.2  | 5.87  | HUMAN  | B3KV21                          | Na(+)/H(+) exchange regulator cofactor NHE-RF1                        |
| 5588 | dirMS_041712_NAR_30mM_minus.27681.7681.2  | 2 | 12.71    | 0 | 2.31E+05 | (KIVDDVD(R)D)I)D/V)N/S)A L R(L)                      | 96.77  | 544.7604 | 1088.533 | -0.0016  | -1.4  | 4.21    | 49709.6  | 5.19  | HUMAN  | BOVY14                          | Vimentin                                                              |
| 5589 | dirMS_041712_NAR_40mM_minus.11004.11004.3 | 3 | 12.71    | 0 | 7.92E+05 | (KIVQSAE(R)G V)S)A S E L/H T S G)I/G P E T L R(D)    | 148.75 | 665.6822 | 1995.051 | -0.0185  | -9.3  | 5.4     | 558007.1 | 5.44  | HUMAN  | PS8107                          | Epiplakin                                                             |
| 5590 | dirMS_041712_NAR_50mM_minus.14560.14560.3 | 3 | 12.71    | 0 | 3.68E+05 | (KIVALTIV(R)A)I)S/T L/V)L H/V)E V)Q)A A)I)D G A/R(K) | 150.95 | 657.6803 | 1971.029 | -0.0031  | -1.6  | 5.32    | 71165.5  | 5.78  | HUMAN  | JK5133                          | Euplathrin heavy chain 1                                              |
| 5591 | dirMS_041712_NAR_50mM_minus.17904.17904.3 | 3 | 12.71    | 1 | 2.31E+05 | (KIVLQAP(K)K A)I)F T)A/V)G E V)I)D V R(R)            | 170.53 | 520.3043 | 1558.895 | 0.0012   | 2     | 6.07    | 26613.5  | 5.68  | HUMAN  | EP9109                          | Epiplakin                                                             |
| 5592 | dirMS_041712_NAR_50mM_minus.15702.15702.3 | 3 | 12.71    | 1 | 3.12E+05 | (KIVVABRG(K)V)A/V L A/V D/L V/S R/R)                 | 124.74 | 597.8237 | 1780.956 | 0.0001   | 0.6   | 6.04    | 26613.5  | 5.68  | HUMAN  | EP9109                          | Epiplakin                                                             |
| 5593 | dirMS_041712_NAR_50mM_plus.11591.11591.3  | 3 | 12.71    | 1 | 1.31E+05 | (KIVGRHD(K)G I)G E D)V)T)P)P)S D)S T R(K)            | 128.73 | 585.9784 | 1755.924 | -0.0029  | -1.7  | 4.56    | 16443.6  | 10.45 | HUMAN  | PE2263                          | 40S ribosomal protein S14                                             |
| 5594 | dirMS_041712_NAR_60mM_plus.16431.16431.3  | 3 | 12.71    | 0 | 4.55E+05 | (KIVAEVPG(R)E A)P)G D V F)I)H/S L(S)                 | 142.63 | 518.5855 | 1553.738 | 0.0006   | 2.3   | 5.32    | 48851.3  | 9.2   | HUMAN  | K7E63                           | ATP synthase subunit alpha, mitochondrial                             |
| 5595 | dirMS_041712_NAR_60mM_plus.20136.20136.3  | 3 | 12.71    | 1 | 6.74E+04 | (KIVSVEEV(K)K S V E)A S E I)Q)I)P)I)T R(G)           | 165.4  | 577.9775 | 1731.928 | -0.0096  | -5.6  | 4.79    | 342421.3 | 6.44  | HUMAN  | PI3524                          | Desmoplakin                                                           |
| 5596 | dirMS_041712_NAR_30mM_minus.17795.17795.2 | 2 | 12.71    | 0 | 3.90E+05 | (KIVGAVG(K)K V)A/V L A/V D/L V/S R/R)                | 117.25 | 345.949  | 1493.702 | 0.0013   | 1     | 6.74    | 24590.2  | 6.74  | HUMAN  | PT4277                          | 6S ribosomal protein L23                                              |
| 5597 | dirMS_041712_NAR_50mM_minus.9390.9390.3   | 3 | 12.7     | 1 | 1.31E+05 | M155m (KIVHVSNA(K)M L)V/S)G)M L)K T L(R/D)           | 121.65 | 450.2541 | 1332.756 | -15.9922 | -1.9  | 8.35    | 5523.2   | 6.02  | HUMAN  | BAD918                          | T-complex protein 1 subunit beta                                      |
| 5598 | dirMS_041712_NAR_60mM_minus.11212.11212.3 | 3 | 12.7     | 1 | 9.28E+05 | M232m (KIVMSm(K)R)M S m K E V D E Q)M/L/V V/L G N(K) | 123.28 | 647.3021 | 1923.897 | -15.9915 | -0.8  | 4.68    | 40069.4  | 4.83  | HUMAN  | E7W191                          | Tubulin beta chain                                                    |
| 5599 | dirMS_041712_NAR_60mM_minus.11468.11468.3 | 3 | 12.7     | 0 | 2.41E+04 | (KIVTQPHQ(K)K P)Y I)Q)V D)I)G G Q)I)T A(R)           | 123.8  | 535.6016 | 1404.864 | -0.014   | -8.7  | 8.17    | 72445.7  | 5.07  | HUMAN  | PI1021                          | 78 kDa glucose-regulated protein                                      |
| 5600 | dirMS_041712_NAR_60mM_minus.15467.15467.3 | 3 | 12.7     | 1 | 2.31E+05 | (KIVAAEA(R)E A)A/E/A/E A L S P R P A L(V/R/S)        | 149.25 | 598.3347 | 1792.992 | -0.002   | -1.1  | 4.79    | 22148.2  | 5.87  | HUMAN  | B3KV21                          | Na(+)/H(+) exchange regulator cofactor NHE-RF1                        |
| 5601 | dirMS_041712_NAR_60mM_minus.9555.9555.3   | 3 | 12.7     | 1 | 2.46E+05 | (KIVQYER(R)R Q)Y E)I)E)T)E I)E V)T)K(S)              | 112.57 | 585.6185 | 1754.844 | -0.0014  | -1.9  | 4.32    | 54214.9  | 5.66  | HUMAN  | C9B13                           | Caldesmon (Fragment)                                                  |
| 5602 | dirMS_041712_NAR_120mM_plus.8211.8211.3   | 3 | 12.7     | 0 | 2.71E+06 | (KIVAAPGA(R)A)P G A E F A P N R/R)                   | 96.73  | 410.2196 | 1228.643 | 0.0001   | 0.8   | 8.79    | 43979.5  | 8.92  | HUMAN  | F50V23                          | NON-POU domain-containing octamer-binding protein                     |
| 5603 | dirMS_041712_NAR_20mM_plus.13721.13721.2  | 2 | 12.7     | 0 | 6.17E+05 | (KIVGALN(K)R G)A)Q)I)N)I)P A S T G A A K(A)          | 127.63 | 706.3975 | 1411.79  | -0.0026  | -1.9  | 8.75    | 31718.5  | 7.17  | HUMAN  | E7U17A                          | Glyceraldehyde 3-phosphate dehydrogenase                              |
| 5604 | dirMS_041712_NAR_20mM_plus.18286.18286.2  | 2 | 12.7     | 0 | 3.65E+05 | (KIVSVEEIR(R)S G)I)V)E L)F S)A)R T(G)                | 149.37 | 661.8302 | 1322.659 | -0.0055  | -4.2  | 4.25    | 53377.8  |       |        |                                 |                                                                       |



|      |                                            |   |        |   |               |                                                                             |                        |          |          |          |         |       |         |          |       |        |                                            |                                                                     |
|------|--------------------------------------------|---|--------|---|---------------|-----------------------------------------------------------------------------|------------------------|----------|----------|----------|---------|-------|---------|----------|-------|--------|--------------------------------------------|---------------------------------------------------------------------|
| 5664 | dirMS_041712_NAR_50mM_minus1.5494.15494.3  | 3 | 12.655 | 1 | 1.73E+05      | (KIDVLFUK(K)D V L I / L / K / D / C / V / G / P / V E / K / A)              | C:Carbamidomethylation | 156.42   | 583.3014 | 1747.893 | -0.0039 | -2.2  | 4.32    | 41827.5  | 7     | HUMAN  | B727A9                                     | Phosphoglycerate kinase                                             |
| 5665 | dirMS_041712_NAR_50mM_minus1.6618.16618.3  | 3 | 12.655 | 1 | 1.61E+05      | (KITYTAM(K)KT V I T / A M / D / V / Y / A L K / R / D)                      | C:Carbamidomethylation | 162.78   | 489.6051 | 1466.804 | -0.0028 | -1.9  | 8.25    | 11367.1  | 11.36 | HUMAN  | PK6205                                     | Histone H4                                                          |
| 5666 | dirMS_041712_NAR_50mM_minus1.7608.7608.3   | 3 | 12.655 | 1 | 1.565E+05     | (KIVYVAVL(K)R V E / A / L / S / F / T / T / R / R / K)                      | C:Carbamidomethylation | 102.07   | 671.2255 | 1277.655 | -0.0027 | -1.1  | 4.53    | 12720.5  | 4.53  | HUMAN  | 14-3-3 protein zeta/delta                  |                                                                     |
| 5667 | dirMS_041712_NAR_120mM_plus.17051.17271.4  | 4 | 12.655 | 1 | 1.15E+06      | (RIVLSSM(K)R LV / S / L / A / D / C / L / N / G / I / R / R)                | C:Carbamidomethylation | 142.77   | 446.4951 | 1782.978 | -0.0119 | -11.7 | 6.72    | 26261.9  | 9.78  | HUMAN  | FGSW6E                                     | Cleavage and polyadenylation-specificity factor subunit 7           |
| 5668 | dirMS_041712_NAR_120mM_plus.17106.17439.3  | 3 | 12.655 | 1 | 1.04E+06      | (RJKVWNA(K)R V N N A / D / D / I / P / N / L / F / R / Q)                   | C:Carbamidomethylation | 143.2    | 517.2637 | 1549.776 | 0.0008  | 0.5   | 5.96    | 26760.7  | 5.95  | HUMAN  | Q13085                                     | Acetyl-CoA carboxylase 1                                            |
| 5669 | dirMS_041712_NAR_120mM_plus.21469.21469.3  | 3 | 12.655 | 1 | 1.304E+05     | (RJKVSLM(K)R V E S / L / W / I / P / R / R)                                 | C:Carbamidomethylation | 165.78   | 425.5799 | 1274.726 | -0.0004 | -0.3  | 8.75    | 14138.1  | 9.89  | HUMAN  | C9JNV2                                     | Protein BUD31 homolog                                               |
| 5670 | dirMS_041712_NAR_120mM_plus.21474.21474.3  | 3 | 12.655 | 0 | 8.33E+05      | (RKHVSLV(K)R V E / A / L / S / F / T / T / R / R / K)                       | C:Carbamidomethylation | 99.1     | 609.2311 | 1214.642 | 0.0021  | 1.5   | 8.76    | 53196.2  | 8.54  | HUMAN  | 903241                                     | Glucosyl-6-phosphoglucoamylase                                      |
| 5671 | dirMS_041712_NAR_20mM_plus.10784.10784.2   | 2 | 12.655 | 0 | 8.63E+04      | (RIFLQDM(K)R E / L / Q / Q / I / N / Q / L / U / Q / T / A / K)             | C:Carbamidomethylation | 146.73   | 738.3942 | 1475.785 | -0.0041 | -2.8  | 6.0     | 66208.7  | 8.32  | HUMAN  | PO4264                                     | Keratin, type II cytoskeletal 1                                     |
| 5672 | dirMS_041712_NAR_20mM_plus.16544.16544.2   | 2 | 12.655 | 0 | 1.35E+05      | (KJTVDFN(K)KT V I D / N / F / T / E / A / T / G / K / I)                    | C:Carbamidomethylation | 185.85   | 682.8565 | 1364.706 | 0.0001  | 0.1   | 4.37    | 23799.1  | 9.48  | HUMAN  | P23284                                     | Peptidyl-prolyl cis-trans isomerase B                               |
| 5673 | dirMS_041712_NAR_20mM_plus.17975.17975.2   | 2 | 12.655 | 0 | 1.12E+05      | (KIVTFDQ(K)K V D / P / P / D / Q / L / T / A / L / T / G / R / I)           | C:Carbamidomethylation | 195.42   | 780.9029 | 1560.802 | -0.0031 | -2.2  | 4.21    | 31330.8  | 9.26  | HUMAN  | EP9082                                     | Maleate dehydrogenase, mitochondrial                                |
| 5674 | dirMS_041712_NAR_30mM_plus.21299.21299.2   | 2 | 12.655 | 0 | 6.77E+05      | (KIVTDFM(K)KT V I / D / S / A / I / R / D)                                  | C:Carbamidomethylation | 112.97   | 475.2687 | 945.536  | -0.0062 | -6.6  | 5.84    | 334221.3 | 6.44  | HUMAN  | P15924                                     | Desmoglein 2                                                        |
| 5675 | dirMS_041712_NAR_30mM_plus.21734.21734.3   | 3 | 12.655 | 0 | 6.70E+05      | (RISGVGIE(K)R V E / L / S / F / T / T / R / R / K)                          | C:Carbamidomethylation | 144.35   | 431.7449 | 862.501  | -0.0114 | -11.4 | 6.0     | 334221.3 | 6.44  | HUMAN  | 14-3-3 protein zeta/delta                  |                                                                     |
| 5676 | dirMS_041712_NAR_30mM_plus.21765.21765.2   | 2 | 12.655 | 0 | 3.91E+05      | (RILSYTQL(K)R / S / Y / T / L / Q / L / R / R)                              | C:Carbamidomethylation | 145.58   | 497.2902 | 993.573  | 0.0004  | 0.4   | 8.75    | 53377.8  | 5.74  | HUMAN  | Q15149                                     | Plectin                                                             |
| 5677 | dirMS_041712_NAR_30mM_plus.21836.21836.2   | 2 | 12.655 | 0 | 2.25E+05      | (KIGVGEGL(K)K V I E G / L / H / I / D / E / N / P / N / R / V)              | C:Carbamidomethylation | 149.43   | 713.3669 | 1425.733 | -0.0067 | -4.7  | 4.14    | 20629.7  | 4.84  | HUMAN  | Q13442                                     | 28 kDa heat- and acid-stable phosphoprotein                         |
| 5678 | dirMS_041712_NAR_40mM_plus.21920.21920.3   | 3 | 12.655 | 1 | 1.93E+05      | (KITSVAQ(K)T S / A / Q / N / L / D / G / V / D / K / A / G / D / V / K / K) | C:Carbamidomethylation | 180.37   | 619.8811 | 1873.033 | -0.004  | -2.2  | 4.43    | 22702.2  | 8.26  | HUMAN  | Q14008                                     | Cytoskeleton-associated protein 5                                   |
| 5679 | dirMS_041712_NAR_40mM_plus.2251.6251.12    | 2 | 12.655 | 0 | 4.37E+05      | (KIVKQPT(K)R K / A / G / T / P / Q / E / R / Q)                             | C:Carbamidomethylation | 96.23    | 510.2483 | 1019.491 | -0.0004 | -0.4  | 6       | 29474.8  | 6.54  | HUMAN  | Q31346                                     | DNA (apurinic or pyrimidinic site) lyase (Fragment)                 |
| 5680 | dirMS_041712_NAR_40mM_plus.2800.8041.3     | 3 | 12.655 | 1 | 1.36E+05      | (KIGVAEAK(K)G A / V / A / I / E / D / G / E / R / T / E / P / K / A / K)    | C:Carbamidomethylation | 121.05   | 504.2907 | 1010.859 | -0.0012 | -0.8  | 4.08    | 19284.3  | 5.23  | HUMAN  | G3V3C7                                     | DNA (apurinic or pyrimidinic site) lyase (Fragment)                 |
| 5681 | dirMS_041712_NAR_50mM_plus.21018.21018.3   | 3 | 12.655 | 0 | 6.15E+05      | (KIVSGE(K)K / V / G / Q / E / I / E / V / R / P / G / V / S / V / K)        | C:Carbamidomethylation | 133.58   | 528.6388 | 1583.9   | -0.0045 | -2.8  | 5.79    | 198852.6 | 9.15  | HUMAN  | Q14091                                     | Eukaryotic translation initiation factor 2 subunit 3                |
| 5682 | dirMS_041712_NAR_50mM_plus.21243.21243.3   | 3 | 12.655 | 1 | 2.64E+05      | (RISVSLN(K)R V S / E / A / N / P / T / Q / D / I / V / A / K / I)           | C:Carbamidomethylation | 135.58   | 528.6388 | 1583.9   | -0.0045 | -2.8  | 5.79    | 198852.6 | 9.15  | HUMAN  | ANM77                                      | RanBP2-like and GRP domain-containing protein 3                     |
| 5683 | dirMS_041712_NAR_50mM_plus.21003.21003.3   | 3 | 12.655 | 0 | 4.42E+06      | (RIGAPV(K)R G / K / P / V / C / A / Q / I / M / E / S / M / I / K / I)      | C:Carbamidomethylation | 179.05   | 626.3278 | 1876.969 | -0.0005 | -0.3  | 8.64    | 18466.1  | 5.78  | HUMAN  | H83SL3                                     | Pyruvate kinase (Fragment)                                          |
| 5684 | dirMS_041712_NAR_60mM_plus.11993.11993.3   | 3 | 12.655 | 0 | 3.20E+05      | (RILQAQDL(K)R Q / A / Q / D / A / V / I / N / C / H / S / K / T)            | C:Carbamidomethylation | 119.52   | 570.5757 | 1010.859 | -0.0027 | -1.6  | 6.74    | 21953.7  | 6.66  | HUMAN  | APVX3                                      | 26S proteasome non-ATPase regulatory subunit 4 (Fragment)           |
| 5685 | dirMS_041712_NAR_60mM_plus.7699.7699.2     | 2 | 12.655 | 1 | 7.47E+05      | (RIVTEEE(K)R / V / T / E / E / K / N / K / I / A / K)                       | C:Carbamidomethylation | 97.92    | 618.8282 | 1236.647 | 0.0021  | 1.7   | 4.79    | 18901.8  | 11.65 | HUMAN  | F5H152                                     | 60S ribosomal protein L13                                           |
| 5686 | dirMS_041712_NAR_120mM_minus.4988.4988.3   | 3 | 12.64  | 1 | 5.89E+05      | (RJAEEDE(K)R / A / E / E / D / E / A / D / P / K / R / I)                   | C:Carbamidomethylation | 79.32    | 453.8716 | 1359.602 | -0.002  | -1.5  | 4.08    | 11529.7  | 4.14  | HUMAN  | P20062                                     | Parathyromin                                                        |
| 5687 | dirMS_041712_NAR_20mM_minus.13807.13807.2  | 2 | 12.64  | 0 | 1.30E+05      | (KILQDQD(K)R A / L / E / C / I / Q / L / V / E / L / R / I)                 | C:Carbamidomethylation | 187.74   | 634.8811 | 1268.757 | -0.0027 | -1.8  | 6.05    | 26161.1  | 5.08  | HUMAN  | EP910                                      | Epipkain                                                            |
| 5688 | dirMS_041712_NAR_30mM_minus.13956.13956.2  | 2 | 12.64  | 0 | 1.66E+05      | (KIVVQK(K)K / V / I / G / Q / M / Q / T / R / I / K)                        | C:Carbamidomethylation | 128.98   | 601.8183 | 1202.631 | -0.0017 | -1.4  | 9.75    | 22562.2  | 8.8   | HUMAN  | Transtgcn-2                                |                                                                     |
| 5689 | dirMS_041712_NAR_30mM_minus.17823.17823.2  | 2 | 12.64  | 0 | 2.89E+05      | (RINNLAGI(K)R / N / L / A / G / A / E / L / F / R / I / R / K)              | C:Carbamidomethylation | 151.62   | 652.8358 | 1304.659 | 0.005   | 3.8   | 4.53    | 193379.8 | 5.48  | HUMAN  | Q00610                                     | Claflarin heavy chain 1                                             |
| 5690 | dirMS_041712_NAR_30mM_minus.9001.9312.2    | 2 | 12.64  | 0 | 1.95E+07      | (KIVNADG(K)K / V / I / D / T / N / T / V / T / R / I / K)                   | C:Carbamidomethylation | 104      | 523.7834 | 1046.548 | 0.0119  | 11.3  | 4.21    | 43773.3  | 5.26  | HUMAN  | F8V2V9                                     | Keratin, type I cytoskeletal 18                                     |
| 5691 | dirMS_041712_NAR_30mM_minus.6899.6899.3    | 3 | 12.64  | 0 | 5.92E+05      | (RITFNAPP(K)R A / T / N / T / R / P / I / E / E / K / R / I / K)            | C:Carbamidomethylation | 105.52   | 527.2846 | 1579.833 | 0.0066  | 4.2   | 4.79    | 55561.8  | 6.42  | HUMAN  | G5E452                                     | Protein disulfide isomerase family A, member 3, isoform CRA_b       |
| 5692 | dirMS_041712_NAR_30mM_minus.10006.10006.3  | 3 | 12.64  | 0 | 1.95E+07      | (RITFNAPP(K)R A / T / N / T / R / P / I / E / E / K / R / I / K)            | C:Carbamidomethylation | 115.17   | 527.2846 | 1579.833 | 0.0066  | 4.2   | 4.79    | 55561.8  | 6.42  | HUMAN  | G5E452                                     | Protein disulfide isomerase family A, member 3, isoform CRA_b       |
| 5693 | dirMS_041712_NAR_60mM_minus.11962.11962.3  | 3 | 12.64  | 1 | 3.03E+06 M72m | (RITTEANE(K)R T / E / M / E / N / E / F / V / L / E / K / G / A / K / F)    | m:Unlabeled methionine | 126.87   | 499.5441 | 1480.772 | 0.0592  | 8.0   | 4.78    | 13588.1  | 4.66  | HUMAN  | F8V767                                     | Keratin, type II cytoskeletal 8 (Fragment)                          |
| 5694 | dirMS_041712_NAR_20mM_plus.19343.19343.2   | 2 | 12.64  | 0 | 8.40E+04      | (RJIJLAVG(K)R L / I / A / G / G / A / I / P / E / L / A / L / R / I)        | C:Carbamidomethylation | 205.1    | 775.9467 | 1550.89  | -0.0039 | -2.5  | 4.53    | 27252.5  | 7.81  | HUMAN  | B722F4                                     | T-complex protein 120 kDa                                           |
| 5695 | dirMS_041712_NAR_20mM_plus.10680.10680.2   | 2 | 12.64  | 0 | 3.56E+05      | (KATVAVD(K)R / A / T / A / V / D / G / A / F / K / E / I)                   | C:Carbamidomethylation | 100.4    | 449.7656 | 978.525  | -0.0015 | -1.6  | 5.88    | 15252.7  | 5.82  | HUMAN  | ANW105                                     | Peroxiredoxin 2, isoform CRA_a                                      |
| 5696 | dirMS_041712_NAR_20mM_plus.13112.13112.3   | 3 | 12.64  | 0 | 1.59E+05      | (RIDLQDQ(K)R A / L / E / C / I / Q / L / V / E / L / R / I)                 | C:Carbamidomethylation | 144.35   | 431.7449 | 862.501  | -0.0114 | -11.4 | 6.0     | 334221.3 | 6.44  | HUMAN  | 14-3-3 protein zeta/delta                  |                                                                     |
| 5697 | dirMS_041712_NAR_40mM_plus.16123.16123.2   | 2 | 12.64  | 0 | 1.50E+05      | (RIVTAAV(K)R / V / T / V / A / V / F / R / G / I)                           | C:Carbamidomethylation | 162.03   | 520.2997 | 1039.593 | -0.0014 | -1.3  | 8.75    | 40069.4  | 4.83  | HUMAN  | ETWVR1                                     | Tubulin beta chain                                                  |
| 5698 | dirMS_041712_NAR_50mM_plus.15687.15751.3   | 3 | 12.64  | 0 | 1.23E+05      | (KJELKIDH(K)K / E / L / D / I / V / P / N / P / E / R / I / K)              | C:Carbamidomethylation | 150.97   | 522.2931 | 1564.869 | -0.0046 | -2.9  | 4.68    | 83605    | 4.97  | HUMAN  | R02838                                     | Heat shock protein HSP 90-beta                                      |
| 5699 | dirMS_041712_NAR_60mM_plus.13029.13030.3   | 3 | 12.64  | 0 | 3.45E+05      | (KIVTYDQ(K)K / V / T / I / D / D / E / S / H / W / S / V / C / V / R / I)   | C:Carbamidomethylation | 124.82   | 661.2296 | 1981.871 | 0.0026  | 1.3   | 4.65    | 33029.4  | 9.62  | HUMAN  | D6R180                                     | Guanine nucleotide-binding protein subunit beta-2-like 1 (Fragment) |
| 5700 | dirMS_041712_NAR_120mM_minus.16703.16954.4 | 4 | 12.63  | 0 | 9.04E+05      | (KIVHTEU(K)K / V / E / M / P / D / H / S / I / E / T / L / R / I / K)       | C:Carbamidomethylation | 146.58   | 447.4904 | 1786.945 | -0.0049 | -2.7  | 5.27    | 85057.6  | 4.94  | HUMAN  | H07900                                     | Heat shock protein HSP 90-alpha                                     |
| 5701 | dirMS_041712_NAR_30mM_minus.13114.13260.2  | 2 | 12.63  | 0 | 3.53E+05      | (KILQDFPK(K)K / Q / I / Q / L / V / E / L / R / I)                          | C:Carbamidomethylation | 125.18   | 541.2823 | 1081.543 | -0.0149 | -13.7 | 6       | 150029.8 | 9.11  | HUMAN  | ETWV20                                     | Unconventional myosin-VI                                            |
| 5702 | dirMS_041712_NAR_30mM_minus.13493.13717.2  | 2 | 12.63  | 0 | 4.15E+05      | (KILSLPFP(K)K / S / L / S / F / R / Q / I / K)                              | C:Carbamidomethylation | 127.68   | 460.2646 | 915.525  | -0.0028 | -3.1  | 8.75    | 12272.7  | 5.08  | HUMAN  | H3BRV9                                     | Nuclear transport factor 2 (Fragment)                               |
| 5703 | dirMS_041712_NAR_30mM_minus.14038.14038.2  | 2 | 12.63  | 0 | 2.72E+05      | (KICDFPM(K)K / D / I / F / I / M / I / K / I)                               | C:Carbamidomethylation | 129.67   | 457.7144 | 910.416  | 0.0054  | 5.9   | 5.84    | 21005.6  | 5.12  | HUMAN  | Q4W760                                     | Lactoylglutathione lyase                                            |
| 5704 | dirMS_041712_NAR_30mM_minus.6973.7029.2    | 2 | 12.63  | 0 | 2.09E+05 M88m | (KIDVDE(K)K / V / I / D / I / N / E / M / K / I / K)                        | m:Unlabeled methionine | 550.7326 | 1084.462 | 15.964   | 1.3     | 4.03  | 13588.1 | 4.66     | HUMAN | F8V767 | Keratin, type II cytoskeletal 8 (Fragment) |                                                                     |
| 5705 | dirMS_041712_NAR_30mM_minus.9977.9741.3    | 3 | 12.63  | 0 | 1.40E+05      | (RISSTTET(K)R / S / T / E / T / C / V / S / A / I / P / K / A)              | C:Carbamidomethylation | 108.25   | 672.31   | 1343.615 | -0.0021 | -1.5  | 6.24    | 27889.9  | 5.48  | HUMAN  | ETWV05                                     | Filamin-B                                                           |
| 5706 | dirMS_041712_NAR_50mM_minus.210820.10820.3 | 3 | 12.63  | 1 | 6.04E+05      | (RJIJFATTN(K)R A / E / T / T / T / A / L / E / S / E / K / S / K)           | C:Carbamidomethylation | 130.4    | 623.6418 | 1868.912 | -0.0015 | -0.8  | 4.32    | 227783.5 | 5.5   | HUMAN  | P53579                                     | Myosin-9                                                            |
| 5707 | dirMS_041712_NAR_20mM_plus.16749.16749.2   | 2 | 12.63  | 0 | 1.86E+05      | (RJIJLUGI(K)R L / I / I / V / G / G / V / A / R / I / K)                    | C:Carbamidomethylation | 186.42   | 556.3437 | 1111.683 | -0.0032 | -2.9  | 6.1     | 83400.6  | 5.29  | HUMAN  | Q29499                                     | ATP-dependent RNA helicase DDX1                                     |
| 5708 | dirMS_041712_NAR_20mM_plus.16969.16969.2   | 2 | 12.63  | 0 | 2.65E+05      | (KIVQAVV(K)K / Q / I / A / V / A / I / C / L / U / Q / R / M)               | C:Carbamidomethylation | 198.78   | 776.9419 | 1552.881 | -0.004  | -2.6  | 5.97    | 10728.1  | 9.15  | HUMAN  | Q9Y514                                     | Mitochondrial inner membrane translocase subunit Tim13              |
| 5709 | dirMS_041712_NAR_30mM_minus.12833.12833.3  | 3 | 12.63  | 0 | 1.98E+05      | (RILQDQD(K)R A / L / E / C / I / Q / L / V / E / L / R / I)                 | C:Carbamidomethylation | 120.23   | 412.7345 | 826.54   | -0.0021 | -2.5  | 8.75    | 37710.6  | 6.36  | HUMAN  |                                            |                                                                     |

|      |                                            |   |       |   |          |                                                    |        |          |          |         |       |      |           |       |       |           |                                                                              |
|------|--------------------------------------------|---|-------|---|----------|----------------------------------------------------|--------|----------|----------|---------|-------|------|-----------|-------|-------|-----------|------------------------------------------------------------------------------|
| 5773 | dirMS_041712_NAR_30mM_plus2.8109.8109.2    | 2 | 12.58 | 0 | 1.34E+06 | (KIQGGGG(K)G/Q/G/G/G/G/SV/P/G V/E/R)               | 97.15  | 64.21878 | 1284.629 | -0.0008 | -0.6  | 6    | 77999.7   | 9.09  | HUMAN | PS5272    | Heterogeneous nuclear ribonucleoprotein M                                    |
| 5774 | dirMS_041712_NAR_30mM_plus2.8217.8684.2    | 2 | 12.58 | 0 | 4.73E+05 | (RIAVVYS(R)A/V/N/V/S/R/V)                          | 98.93  | 414.7159 | 828.425  | -0.0007 | -0.6  | 8.63 | 71165.3   | 5.57  | HUMAN | JK513     | Claflarin heavy chain 1                                                      |
| 5775 | dirMS_041712_NAR_50mM_plus2.10721.1071.3   | 2 | 12.58 | 1 | 2.46E+05 | (RIMQDQ(R)M Q/E I/T A/L/L/L/L/L)                   | 105.32 | 490.5973 | 1463.778 | -0.0007 | -0.5  | 6.07 | 71336.6   | 8.73  | HUMAN | 640307    | ATP-dependent RNA helicase DDX5Y                                             |
| 5776 | dirMS_041712_NAR_50mM_plus2.18720.18720.3  | 2 | 12.58 | 0 | 1.19E+06 | (RIQFHLR(R) G F H L P/V/E/V/A/V/Q/R/G)             | 176.98 | 514.9522 | 1542.843 | -0.0005 | -0.4  | 6.75 | 53378.8   | 5.74  | HUMAN | Q15149    | Plectin                                                                      |
| 5777 | dirMS_041712_NAR_50mM_plus2.19847.19847.3  | 2 | 12.58 | 0 | 7.56E+04 | (KILFIFIDIS(K)I/F/I/F/D/S/D/H/T/D/Q/R/I)           | 172.73 | 611.9758 | 1833.913 | -0.0001 | -0.1  | 4.41 | 51524.1   | 4.82  | HUMAN | F5H812    | Protein disulfide-isomerase                                                  |
| 5778 | dirMS_041712_NAR_50mM_plus2.20554.20554.3  | 2 | 12.58 | 1 | 1.38E+05 | (RIGGPNIR(R)G G/P/N/V/I/L/A/D/V/K V/D P P V/SR/IT) | 176.98 | 622.3526 | 1865.049 | -0.0058 | -3.1  | 5.96 | 45481.2   | 7.85  | HUMAN | F7EUB6    | Casein kinase II subunit alpha                                               |
| 5779 | dirMS_041712_NAR_50mM_plus2.7425.7425.3    | 2 | 12.58 | 1 | 2.93E+05 | (RIVYEGOT(R)R V/G/Q/D/T/P/M P K V G/R/R)           | 105.32 | 490.5973 | 1463.778 | -0.0007 | -0.5  | 6.07 | 71336.6   | 8.73  | HUMAN | 640307    | ATP-dependent RNA helicase DDX5Y                                             |
| 5780 | dirMS_041712_NAR_50mM_plus2.7798.7798.3    | 2 | 12.58 | 1 | 1.02E+05 | (KRIEQDAQE(K)E/L/Q/A/E/G/K/S/R/D/L/E/R/L)          | 106.55 | 514.9321 | 1542.776 | 0.0059  | 3.88  | 4.41 | 63374.2   | 8.64  | HUMAN | PI02744   | Glucose-6-phosphate isomerase                                                |
| 5781 | dirMS_041712_NAR_60mM_plus.12463.12810.3   | 2 | 12.58 | 1 | 3.93E+06 | (KJVKLEAE(K)K V/K L/E A/E I A/T/R/R/R)             | 123.08 | 431.5782 | 1292.721 | -0.0008 | -0.6  | 6.11 | 43773.3   | 5.26  | HUMAN | F8V219    | Keratin, type I cytoskeletal 18                                              |
| 5782 | dirMS_041712_NAR_20mM_minus.12218.12218.2  | 2 | 12.57 | 0 | 1.37E+05 | (KLVYSGAE(K)K V/S V/Q/A/E I/V D/G N A/K/M)         | 171.23 | 575.9044 | 1541.806 | -0.0043 | -3    | 4.14 | 105308.6  | 5.27  | HUMAN | Q43707    | Alpha-actinin-4                                                              |
| 5783 | dirMS_041712_NAR_30mM_plus.18181.18181.2   | 2 | 12.57 | 0 | 2.92E+04 | (RINLVNGE(R)I)N/L/V/G/S/E S/P/L/Q                  | 153.3  | 357.3333 | 1113.663 | -0.0035 | -3    | 6    | 119157.2  | 5.4   | HUMAN | B03083    | HLA-B associated transcript 3                                                |
| 5784 | dirMS_041712_NAR_50mM_plus.7899.7899.3     | 2 | 12.57 | 1 | 1.50E+05 | (RIVYACWET(R)A/V/Q/D/T/P/M P K V G/R/R)            | 105.32 | 490.5973 | 1463.778 | -0.0004 | -0.2  | 6.81 | 441.12 KM | 4.78  | HUMAN | LOC260334 | Tubulin beta 8 chain-like protein LOC260334                                  |
| 5785 | dirMS_041712_NAR_60mM_minus.14132.14204.3  | 2 | 12.57 | 1 | 4.08E+05 | (KQYIMACC(K)Y/M A/C C/L L Y/R G/D V/P/K/E)         | 138.77 | 620.9608 | 1844.886 | 15.9823 | -6.8  | 8.49 | 50706.6   | 5.68  | HUMAN | A6N142    | Tubulin alpha chain-like 3                                                   |
| 5786 | dirMS_041712_NAR_120mM_plus.14135.14639.3  | 2 | 12.57 | 1 | 2.83E+06 | (RQIQLREY(R)R L/R E R/Q/L/M/V I/K/Q)               | 128.7  | 517.6042 | 1550.8   | -0.0015 | -1    | 6.14 | 56607.4   | 5.37  | HUMAN | F8XB04    | Keratin, type II cytoskeletal 8                                              |
| 5787 | dirMS_041712_NAR_20mM_plus.7939.7939.2     | 2 | 12.57 | 0 | 4.38E+03 | (RIGLAMP(R)G L/A N P/P/A/P E/F K/V)                | 124.33 | 610.3183 | 1219.632 | -0.0024 | -2    | 4.53 | 54333.1   | 6.51  | HUMAN | HD0551    | Protein transport protein Sec16A (Fragment)                                  |
| 5788 | dirMS_041712_NAR_30mM_plus.14471.14471.2   | 2 | 12.57 | 0 | 1.82E+05 | (RIVATWY(R)R V/I/T/W/V/R Q/P A/R/K)                | 128.88 | 595.3977 | 1189.611 | -0.0031 | -2.6  | 9.17 | 18901.8   | 11.65 | HUMAN | F5H152    | 60S ribosomal protein L13                                                    |
| 5789 | dirMS_041712_NAR_30mM_plus.19600.19600.2   | 2 | 12.57 | 0 | 2.69E+05 | (RQIAPVRF(K)P A/P/D/F/V/F/A/N/P/K)                 | 106.55 | 591.8008 | 1824.594 | 0.0004  | -0.1  | 5.88 | 72128.8   | 6.3   | HUMAN | A7Y18     | Radixin                                                                      |
| 5790 | dirMS_041712_NAR_30mM_plus2.9032.9073.2    | 2 | 12.57 | 0 | 3.30E+05 | (KQJAEILDQ(K)K L/E L/D/Q/E/R/K)                    | 101.05 | 487.2518 | 973.495  | 0.0014  | 1.5   | 4.14 | 72128.8   | 6.3   | HUMAN | A7Y18     | Radixin                                                                      |
| 5791 | dirMS_041712_NAR_40mM_plus.11462.11462.2   | 2 | 12.57 | 0 | 6.40E+04 | (RISVPTWY(R)S V/I/P T/W L/K)                       | 133.45 | 415.7412 | 830.477  | -0.0019 | -2.3  | 8.47 | 12573.5   | 10.39 | HUMAN | EP9550    | 40S ribosomal protein S13 (Fragment)                                         |
| 5792 | dirMS_041712_NAR_40mM_plus2.9681.9681.3    | 2 | 12.57 | 0 | 1.97E+05 | (RQJAEDEP(R)A/E Q/D/T/P/A/A/P/P/R P A G G/R)       | 120.92 | 572.6438 | 1715.919 | -0.0019 | -1.1  | 6.12 | 73866.7   | 10.21 | HUMAN | 83KXW5    | Alpha-L-fucosidase                                                           |
| 5793 | dirMS_041712_NAR_50mM_plus2.10600.10600.3  | 2 | 12.57 | 0 | 5.07E+05 | (KQIMVVDY(K)M I/V D/P V/E P H G E/M G)             | 123.22 | 494.5783 | 1481.713 | 0.0076  | 5.2   | 4.65 | 90316.8   | 5.52  | HUMAN | Q13263    | Transcription intermediary factor 1-beta                                     |
| 5794 | dirMS_041712_NAR_50mM_plus2.11823.11926.3  | 2 | 12.57 | 1 | 3.79E+05 | (KQIWHREY(K)G R I E D/V T/P P/D/S T S/R)           | 130.28 | 585.9784 | 1755.924 | -0.0029 | -1.7  | 4.56 | 16443.6   | 10.45 | HUMAN | PE2623    | 40S ribosomal protein S14                                                    |
| 5795 | dirMS_041712_NAR_50mM_plus2.18604.18604.3  | 2 | 12.57 | 0 | 3.58E+05 | (RILILGADQ(R) L/D/D A/P P L A I/A/N/K/A)           | 165.82 | 458.622  | 1373.852 | -0.0001 | -0    | 6.74 | 16469.8   | 8     | HUMAN | K7EM77    | Halocacid dehalogenase-like hydrolase domain-containing protein 2 (Fragment) |
| 5796 | dirMS_041712_NAR_30mM_plus.11138.11138.3   | 2 | 12.57 | 1 | 2.86E+05 | (RILQPSGQ(R)R P G S G P E P A S Q Y Q/R)           | 105.62 | 634.6529 | 1901.946 | -0.0028 | -1.2  | 6.14 | 80880.5   | 5.54  | HUMAN | JK3M13    | Nuclear pore complex protein Nup88 (Fragment)                                |
| 5797 | dirMS_041712_NAR_50mM_plus.12478.12617.3   | 2 | 12.57 | 1 | 3.93E+06 | (KIKVLEAE(K)K V/K L/E A/E I A/T/R/R/R)             | 123.08 | 431.5782 | 1292.721 | -0.0008 | -0.6  | 6.11 | 43773.3   | 5.26  | HUMAN | F8V219    | Keratin, type I cytoskeletal 18                                              |
| 5798 | dirMS_041712_NAR_50mM_minus.11314.11314.3  | 2 | 12.56 | 1 | 4.87E+05 | (KQILAMTE(K)K/L/A/V/A/G M/D/T D/K I/Q)             | 133.38 | 511.6179 | 1532.835 | 0.0039  | 2.5   | 5.96 | 57204.9   | 6.01  | HUMAN | FSQW65    | T-complex protein 1 subunit beta                                             |
| 5799 | dirMS_041712_NAR_20mM_plus.14775.14775.2   | 2 | 12.56 | 0 | 1.17E+05 | (KQIFANPP(K)A/N P/P P A A V/R)                     | 107.78 | 545.2958 | 1089.584 | 0.0003  | 0.3   | 9.75 | 61363     | 8.73  | HUMAN | CJ1059    | Propionyl-CoA carboxylase beta chain, mitochondrial                          |
| 5800 | dirMS_041712_NAR_30mM_plus2.10026.10026.2  | 2 | 12.56 | 0 | 3.07E+05 | (KILAQFPY(K)A/E Q/D/P/R/Q)                         | 105.62 | 490.7352 | 860.462  | 0.0006  | 0.7   | 6    | 15787.8   | 9.12  | HUMAN | EP9110    | Transcription factor BTf3 homolog 4                                          |
| 5801 | dirMS_041712_NAR_30mM_plus.10115.10115.2   | 2 | 12.56 | 0 | 7.52E+04 | (RIVYVATY(R)R V/I/V/A/Q/D/T/P/M P K V G/R/R)       | 105.78 | 620.9608 | 1844.886 | -0.0004 | -0.2  | 6.81 | 441.12 KM | 4.78  | HUMAN | LOC260334 | Tubulin beta 8 chain-like protein LOC260334                                  |
| 5802 | dirMS_041712_NAR_30mM_plus2.19177.19177.2  | 2 | 12.56 | 0 | 2.42E+05 | (RILTKADU(R)T A/E/D/L/E/A/R/I)                     | 153.35 | 282.796  | 1164.59  | -0.0048 | -4.1  | 4.14 | 53377.8   | 5.74  | HUMAN | Q15149    | Plectin                                                                      |
| 5803 | dirMS_041712_NAR_30mM_plus2.20917.21105.2  | 2 | 12.56 | 0 | 4.83E+05 | (KQJADLTFY(K)I D L/D/T/D/V/A/L/I)                  | 164.88 | 538.8012 | 1106.609 | -0.0141 | -12.7 | 4.21 | 18141.9   | 4.7   | HUMAN | F6V0H7    | Hsc70-interacting protein (Fragment)                                         |
| 5804 | dirMS_041712_NAR_30mM_plus2.7658.7132.2    | 2 | 12.56 | 0 | 5.88E+06 | (KQNMMA(K)M N M A A C I P H/R)                     | 94.58  | 313.2174 | 1065.427 | 0.0001  | 0.1   | 5.84 | 50199.4   | 4.75  | HUMAN | A6N122    | Tubulin beta-8 chain-like protein LOC260334                                  |
| 5805 | dirMS_041712_NAR_30mM_plus2.8277.8277.2    | 2 | 12.56 | 0 | 1.25E+05 | (KQIEMAEY(K)E V/A L/A/E/V/V/V/V/V T/K)             | 105.62 | 490.5973 | 1463.778 | -0.0002 | -0.1  | 6.92 | 36982.42  | 6.73  | HUMAN | EP9550    | 40S ribosomal protein S13 (Fragment)                                         |
| 5806 | dirMS_041712_NAR_40mM_plus2.9608.9767.2    | 2 | 12.56 | 0 | 7.73E+05 | (KQJAEILDQ(K)K L/E L/D/P/W/R/K)                    | 104.82 | 524.2438 | 1047.478 | 0.0028  | 2.7   | 4.03 | 76262.2   | 9.53  | HUMAN | PE2346    | Splicing factor, proline- and glutamine-rich                                 |
| 5807 | dirMS_041712_NAR_40mM_plus2.17965.17965.3  | 2 | 12.56 | 0 | 1.63E+04 | 866n (KILQQLV(N)K E/Q L V h T/D L I L Y/K)         | 172.2  | 607.3654 | 1775.920 | -0.0037 | -11.8 | 4.03 | 48264.6   | 5.98  | HUMAN | Q696V4    | Tektin-1                                                                     |
| 5808 | dirMS_041712_NAR_50mM_plus2.19275.19275.3  | 2 | 12.56 | 0 | 8.48E+05 | (RQIWFNH(R)F H/H I N/V E/S/L/L/E/K/K)              | 170.1  | 531.6232 | 1598.854 | -0.0013 | -0.8  | 5.32 | 20931.1   | 10.28 | HUMAN | DR8AN4    | 60S ribosomal protein L9 (Fragment)                                          |
| 5809 | dirMS_041712_NAR_50mM_plus2.6025.6025.3    | 2 | 12.56 | 0 | 1.87E+05 | (RILNAPAR(R)I/E/A A/P Q/D/P/E F Q/R/S)             | 95.88  | 489.5906 | 1466.76  | -0.0025 | -1.7  | 4.79 | 15660.9   | 10.38 | HUMAN | EL119     | FLVCH family member 2                                                        |
| 5810 | dirMS_041712_NAR_50mM_plus2.8636.8636.3    | 2 | 12.56 | 0 | 1.10E+06 | (RILESGMC(R)E G/S G/M/Q/V/S/L/H/K/T)               | 112.92 | 492.5704 | 1454.698 | -0.0045 | -4.1  | 6.75 | 56607.4   | 5.37  | HUMAN | F8V219    | Keratin, type I cytoskeletal 8                                               |
| 5811 | dirMS_041712_NAR_60mM_plus.4778.4778.3     | 2 | 12.56 | 1 | 3.22E+05 | (KQJAGDAE(K)A/G/W E E R A/E T A/R)                 | 79.42  | 425.868  | 1275.592 | -0.0029 | -2.3  | 4.41 | 57204.9   | 6.01  | HUMAN | FSQW65    | T-complex protein 1 subunit beta                                             |
| 5812 | dirMS_041712_NAR_60mM_plus.5755.5755.3     | 2 | 12.56 | 0 | 1.87E+05 | (RISITFET(R)S/T I/E/E/H A G Q/R/D)                 | 88.4   | 421.5294 | 1262.576 | -0.0024 | -1.9  | 5.38 | 160853.1  | 6.11  | HUMAN | F8VU51    | YLP motif-containing protein 1                                               |
| 5813 | dirMS_041712_NAR_20mM_minus.794.7194.4     | 2 | 12.55 | 0 | 1.40E+05 | (KQILTSEY(K)T L/T T/S/E E/E A/R/L)                 | 119.73 | 567.785  | 1134.564 | -0.001  | -0.9  | 4.25 | 33940.9   | 9.27  | HUMAN | F5H308    | L-lactate dehydrogenase                                                      |
| 5814 | dirMS_041712_NAR_30mM_plus2.10472.10615.2  | 2 | 12.55 | 0 | 1.47E+05 | (RILQIWFNH(R)F H/H I N/V E/S/L/L/E/K/K)            | 170.1  | 531.6232 | 1598.854 | -0.0013 | -0.8  | 5.32 | 20931.1   | 10.28 | HUMAN | DR8AN4    | 60S ribosomal protein L9 (Fragment)                                          |
| 5815 | dirMS_041712_NAR_30mM_plus2.17786.17786.2  | 2 | 12.55 | 0 | 1.60E+05 | (RIVPFSLR(K)R V/I/V/S/L/L/R)                       | 105.62 | 490.7352 | 860.462  | 0.0004  | 0.7   | 6    | 15787.8   | 9.12  | HUMAN | EP9110    | Transcription factor BTf3 homolog 4                                          |
| 5816 | dirMS_041712_NAR_30mM_minus.18551.18551.2  | 2 | 12.55 | 0 | 4.01E+05 | (RQJAEDEP(R)A/E Q/D/P/W/R/K)                       | 104.82 | 524.2438 | 1047.478 | 0.0028  | 2.7   | 4.03 | 76262.2   | 9.53  | HUMAN | PE2346    | Splicing factor, proline- and glutamine-rich                                 |
| 5817 | dirMS_041712_NAR_40mM_plus2.12326.12326.3  | 2 | 12.55 | 0 | 1.61E+05 | (RILQQLDQ(R)Q Q/E/D L/P/V/T/D L O H Q/R/Q)         | 155.46 | 646.6596 | 1937.956 | 0.0079  | 4.1   | 4.03 | 23493.8   | 5.45  | HUMAN | F8V7L3    | Myosin-10                                                                    |
| 5818 | dirMS_041712_NAR_50mM_plus.10685.10685.3   | 2 | 12.55 | 0 | 2.71E+05 | (KQVYFQY(K)R V/I/G/E/R/V/P/S/L/V/T/K)              | 129.15 | 578.3032 | 1788.902 | -0.0056 | -3.9  | 8.72 | 43374.2   | 8.64  | HUMAN | PI02744   | Glucose-6-phosphate isomerase                                                |
| 5819 | dirMS_041712_NAR_50mM_plus2.16680.16680.3  | 2 | 12.55 | 1 | 1.61E+05 | (KQIYFAMG(R)T V T A M D V V A/L/R/K)               | 102.76 | 489.6051 | 1466.804 | -0.0028 | -1.9  | 8.25 | 11367.1   | 11.36 | HUMAN | PK2805    | Histone H4                                                                   |
| 5820 | dirMS_041712_NAR_60mM_minus.115363.11536.3 | 2 | 12.55 | 0 | 6.83E+04 | 1M86m (KQNMNH(K)M N/Q V E H/V P/S L/D/R/A)         | 124.27 | 566.611  | 1651.822 | 15.9967 | -1.1  | 5.32 | 26717.1   | 8.65  | HUMAN | PD2618    | Proteasome subunit beta type-1                                               |
| 5821 | dirMS_041712_NAR_60mM_minus.13254.13254.3  | 2 | 12.55 | 0 | 5.71E+04 | (RILNIDRE(K)R N D V/E R P T T Y N L/R/L)           | 133.1  | 571.6304 | 1718.882 | -0.0054 | -3.1  | 6.07 | 49012.3   | 4.9   | HUMAN | AMBU15    | Tubulin alpha-4A chain                                                       |
| 5822 | dirMS_041712_NAR_50mM_plus.12408.12408.2   | 2 | 12.55 | 0 | 1.87E+05 | (RQIWFNH(R)F H/H I N/V E/S/L/L/E/K/K)              | 138.58 | 586.8084 | 1172.609 | 0.0003  | 0.3   | 6    | 61018.6   | 9.44  | HUMAN | B4D0W5    | Probable ATP-dependent RNA helicase DDX5                                     |
| 5823 | dirMS_041712_NAR_20mM_plus.14977.14977.2   | 2 | 12.55 | 0 |          |                                                    |        |          |          |         |       |      |           |       |       |           |                                                                              |

|      |                                            |   |       |   |                |                                                           |                          |        |          |          |         |       |      |          |             |         |                                                                      |                                                           |
|------|--------------------------------------------|---|-------|---|----------------|-----------------------------------------------------------|--------------------------|--------|----------|----------|---------|-------|------|----------|-------------|---------|----------------------------------------------------------------------|-----------------------------------------------------------|
| 5882 | dirMS_041712_NAR_30mM_plus2.17922.17922.2  | 2 | 12.51 | 0 | 6.24E-04       | (KITFEVCC)(KIT F I E V C D P/V P R)                       | C.carbonamidomethylation | 147.03 | 618.3057 | 1235.609 | -0.048  | -3.9  | 4.37 | 99900.1  | 5.04 HUMAN  | B4D2B   | Coatamer protein complex, subunit beta 2 (Beta prime), isoform CRA_b |                                                           |
| 5883 | dirMS_041712_NAR_30mM_plus2.19492.19492.2  | 2 | 12.51 | 0 | 1.17E-05       | (KIDVMAA)(KQI QV A N A Q V L I Q D R M)                   |                          | 155.75 | 776.9425 | 1552.881 | -0.028  | -1.8  | 5.97 | 10728.1  | 9.15 HUMAN  | D9Y14   | Mitochondrial import inner membrane translocase subunit Tim13        |                                                           |
| 5884 | dirMS_041712_NAR_30mM_plus2.22066.22066.2  | 2 | 12.51 | 0 | 1.54E-05       | (KILVLSU)(R L V G G P N V D R E T K G C K)                |                          | 171.07 | 821.5511 | 1622.577 | -0.007  | -4.2  | 9.75 | 20864.8  | 6.9 HUMAN   | PH3     | Nucleic acid phosphorylase (Fragment)                                |                                                           |
| 5885 | dirMS_041712_NAR_30mM_plus2.6050.6050.2    | 2 | 12.51 | 0 | 1.82E-05       | (RSDIEMA)(R D S I V M Q Q K I)                            |                          | 86     | 489.7318 | 976.456  | -0.003  | -1.7  | 4.37 | 5215.9   | 10.07 HUMAN | BSM5CG1 | Small EDRF-rich factor 2                                             |                                                           |
| 5886 | dirMS_041712_NAR_40mM_plus2.14965.15036.3  | 3 | 12.51 | 0 | 2.29E-05       | (RJEVDLQ)(R E V D L U K P Q V E G I Q K S)                |                          | 155.13 | 608.6749 | 1824.011 | -0.0012 | -0.66 | 4.32 | 156557.7 | 5.52 HUMAN  | GB8U2P  | Kinectin                                                             |                                                           |
| 5887 | dirMS_041712_NAR_40mM_plus2.15272.15276.3  | 3 | 12.51 | 0 | 3.14E-05       | (KGVYIIPR)(K V V T H G P A T V G G P K G C K I)           | C.carbonamidomethylation | 156.28 | 624.883  | 1872.041 | -0.0067 | -3.6  | 1.0  | 91839.6  | 9.22 HUMAN  | BAE39P  | ATP-citrate lyase                                                    |                                                           |
| 5888 | dirMS_041712_NAR_50mM_plus2.11680.11689.3  | 3 | 12.51 | 1 | 1.92E-05       | (KITGPMV)(K I G Q P N V D T R E T K G C K)                |                          | 126.08 | 608.534  | 1823.895 | -0.0059 | -1.4  | 5.73 | 5724.2   | 9.54 HUMAN  | H3892P  | RNA-binding protein RUS                                              |                                                           |
| 5889 | dirMS_041712_NAR_50mM_plus2.13793.13793.3  | 3 | 12.51 | 1 | 4.77E-05       | (RISLKDIO)(R S L K I D V V N V T K I)                     |                          | 140.5  | 458.2605 | 1372.78  | -0.0125 | -9.1  | 5.68 | 42755    | 7.81 HUMAN  | 87Z2F4  | T-complex protein 1 subunit delta                                    |                                                           |
| 5890 | dirMS_041712_NAR_50mM_plus2.14714.14714.3  | 3 | 12.51 | 1 | 9.20E-05       | (KMQSAA)(K M Q S A F S A A A D V D K I)                   |                          | 145.55 | 560.9581 | 1680.863 | -0.0028 | -1.7  | 5.72 | 180453.7 | 6.04 HUMAN  | HOY02   | YLP motif-containing protein 1 (Fragment)                            |                                                           |
| 5891 | dirMS_041712_NAR_60mM_plus.13931.14436.3   | 3 | 12.51 | 1 | 1.02E-06       | (RISGKAPL)(R S G K A P R I A T D V A S R I G)             |                          | 131.57 | 500.2895 | 1498.599 | -0.0043 | -3.2  | 8.46 | 73202    | 9.19 HUMAN  | CJMU5   | Probable ATP-dependent RNA helicase DXD17                            |                                                           |
| 5892 | dirMS_041712_NAR_30mM_plus.10134.10159.2   | 2 | 12.5  | 0 | 1.30E-06       | (RITGSD)(R T F I E G V C A S A D P K I)                   |                          | 109    | 453.7385 | 906.457  | -0.003  | 3.3   | 4.37 | 51636.5  | 8.68 HUMAN  | F7U123  | Rab GDP-dissociation inhibitor B1                                    |                                                           |
| 5893 | dirMS_041712_NAR_30mM_plus.14064.14064.2   | 2 | 12.5  | 0 | 1.82E-05       | (KIDVPLFA)(K I V S V N G G V A N E K I)                   |                          | 129.85 | 519.4097 | 945.511  | -0.0037 | 3.9   | 5.97 | 24964.8  | 9.8 HUMAN   | CU3918  | Regulator of chromosome condensation (Fragment)                      |                                                           |
| 5894 | dirMS_041712_NAR_30mM_minus2.8631.8631.2   | 2 | 12.5  | 0 | 4.89E-05 M28tm | (RFAEAS)(R A E A E S H Y Q K Y I)                         | m.Oxidized methionine    | 101.12 | 593.2765 | 1169.551 | 15.995  | 0.1   | 4.53 | 32796.3  | 5.3 HUMAN   | F8VU64  | Keratin, type II cytoskeletal 8                                      |                                                           |
| 5895 | dirMS_041712_NAR_40mM_minus2.13120.13203.3 | 3 | 12.5  | 1 | 2.01E-05 M148m | (RJDLDAR)(R D L J A G R D I T D L Y N K I)                | m.Oxidized methionine    | 161.12 | 547.2822 | 1623.841 | -0.0091 | -2.4  | 4.43 | 37482.1  | 5.36 HUMAN  | EP930   | Actin, gamma-enteric smooth muscle                                   |                                                           |
| 5896 | dirMS_041712_NAR_40mM_minus2.9435.9435.3   | 3 | 12.5  | 1 | 4.72E-04       | (KAGTAEA)(K A G V T E A V V V D L K L K I)                |                          | 138.08 | 584.64   | 1751.906 | -0.0007 | -0.4  | 4.32 | 31066.8  | 6.85 HUMAN  | D9NCR4  | Omega-aminidase NIT2                                                 |                                                           |
| 5897 | dirMS_041712_NAR_50mM_plus.15428.15428.3   | 3 | 12.5  | 0 | 7.78E-04       | (RDIETPR)(R D I T P V E L V L R N I)                      |                          | 155.98 | 415.2407 | 1371.737 | -0.0023 | -1.8  | 5.32 | 38779.2  | 5.93 HUMAN  | Q96266  | mTppp-diphosphatase                                                  |                                                           |
| 5898 | dirMS_041712_NAR_20mM_plus.12891.12891.2   | 2 | 12.5  | 0 | 1.48E-05       | (RILVLPAS)(R V V P A S Q C S L I G K I)                   | C.carbonamidomethylation | 116.62 | 714.8991 | 1428.788 | -0.0003 | -2.1  | 8.75 | 32621    | 8.75 HUMAN  | B4DLC0  | Poly(C)-binding protein 2                                            |                                                           |
| 5899 | dirMS_041712_NAR_20mM_plus.14970.14970.2   | 2 | 12.5  | 0 | 1.45E-05       | (KVLQLTK)(K V L Q V T G Q T P V P F S K I)                |                          | 174.65 | 773.2424 | 1546.848 | -0.0068 | -3.9  | 5.97 | 20480.2  | 9.91 HUMAN  | PE2913  | 60S ribosomal protein L11                                            |                                                           |
| 5900 | dirMS_041712_NAR_20mM_plus.6989.6989.2     | 2 | 12.5  | 0 | 1.09E-05       | (KAGFAGE)(K A G F I A G D V A P R I)                      |                          | 114.77 | 488.7307 | 976.448  | -0.0056 | -6    | 4.21 | 123697.1 | 5.8 HUMAN   | AS4AE0  | POE arginyl domain family member F                                   |                                                           |
| 5901 | dirMS_041712_NAR_30mM_plus.19189.19189.2   | 2 | 12.5  | 0 | 2.07E-05       | (KIPYQLK)(K I P Y P K L I L P I G R I)                    |                          | 153.25 | 528.814  | 1056.62  | 0.0007  | 0.6   | 8.75 | 45226.3  | 6.03 HUMAN  | F5H737  | Adenosylhomocysteinase                                               |                                                           |
| 5902 | dirMS_041712_NAR_30mM_plus2.6411.6412.2    | 2 | 12.5  | 0 | 1.01E-05       | (RISVPCPS)(R S V S P C S V E S R L K I)                   | C.carbonamidomethylation | 87.83  | 611.2799 | 1221.553 | -0.0003 | -0.2  | 5.72 | 99885.2  | 12.36 HUMAN | 3L1812  | Serine/arginine repetitive matrix protein 2 (Fragment)               |                                                           |
| 5903 | dirMS_041712_NAR_40mM_plus2.5886.5886.2    | 2 | 12.5  | 0 | 6.04E-04       | (KSGVLSK)(K S G V L I S E R I)                            |                          | 92.52  | 449.7162 | 898.427  | -0.0014 | -1.5  | 5.72 | 65692.2  | 5.7 HUMAN   | E7EQRA  | Ezrin                                                                |                                                           |
| 5904 | dirMS_041712_NAR_50mM_plus2.17454.17454.3  | 3 | 12.5  | 0 | 6.18E-05       | (KIVUSSIA)(K I V L S V Q D C L H G I E S K I)             | C.carbonamidomethylation | 150.32 | 600.3189 | 1798.937 | 0.0054  | 3     | 5.32 | 52440.1  | 6           | HUMAN   | F8WJN3                                                               | Cleavage and polyadenylation-specificity factor subunit 6 |
| 5905 | dirMS_041712_NAR_30mM_plus2.20215.20215.3  | 3 | 12.5  | 0 | 5.21E-05       | (RQIDMPT)(R Q I D Q R P T T A I N W L Q S L L K I)        |                          | 179.54 | 597.9962 | 1791.979 | -0.0045 | -2.5  | 9.99 | 15002.8  | 9.11 HUMAN  | F7EW20  | Uncoupling and inorganic pyrophosphatase                             |                                                           |
| 5906 | dirMS_041712_NAR_30mM_plus2.21774.21774.3  | 3 | 12.5  | 0 | 3.20E-05       | (KIAMMKA)(K I A M Y M K V M S V D V D E R I)              |                          | 185.7  | 587.6346 | 1760.864 | -0.0057 | -4.6  | 4.54 | 61363    | 8.73 HUMAN  | 63V723  | Propionyl-CoA carboxylase beta chain, mitochondrial                  |                                                           |
| 5907 | dirMS_041712_NAR_60mM_plus.20388.20388.3   | 3 | 12.5  | 1 | 4.21E-05       | (KINAAAG)(K I N A G A N G W A L D L N K L E K I)          |                          | 166.93 | 452.6004 | 1355.789 | -0.0026 | -2    | 6.07 | 13786.8  | 9.33 HUMAN  | B7Z451  | Transcription elongation factor A protein 1                          |                                                           |
| 5908 | dirMS_041712_NAR_60mM_plus.21703.21703.3   | 3 | 12.5  | 0 | 8.78E-04       | (RILHFMF)(R I L H F F M P G V I A P N U T S R I)          |                          | 181.67 | 540.9492 | 1620.835 | -0.0025 | -1.5  | 9.75 | 42330.8  | 4.77 HUMAN  | AN6K28  | Putative tubulin beta chain-like protein ENSP0000290377              |                                                           |
| 5909 | dirMS_041712_NAR_120mM_minus.8936.8936.2   | 2 | 12.49 | 0 | 5.88E-05       | (KIFVALS)(K I F V L I S V T N T T V K I)                  |                          | 103.23 | 609.8267 | 1216.648 | -0.0017 | -1.3  | 8.76 | 63374.2  | 8.64 HUMAN  | P06744  | Glucose-6-phosphate isomerase                                        |                                                           |
| 5910 | dirMS_041712_NAR_30mM_plus.15471.15471.2   | 2 | 12.49 | 0 | 4.31E-04       | (KIPYPLK)(K I P Y P K L I L P I G R I)                    |                          | 138.1  | 521.249  | 945.511  | -0.0027 | -4.3  | 3.81 | 21618.26 | 12.11 HUMAN | PH3     | Inorganic pyrophosphatase                                            |                                                           |
| 5911 | dirMS_041712_NAR_30mM_plus2.18593.18593.2  | 2 | 12.49 | 0 | 3.07E-05       | (KIPYPLAK)(K I P Y P K L I L P I G R I)                   |                          | 155.38 | 528.816  | 1056.62  | -0.0044 | -4.4  | 8.75 | 43242.8  | 6.03 HUMAN  | F5H737  | Adenosylhomocysteinase                                               |                                                           |
| 5912 | dirMS_041712_NAR_40mM_minus2.10943.10943.3 | 3 | 12.49 | 0 | 1.84E-05       | (RJDLSHG)(R D L S H G D V A I P V S C A K I)              | C.carbonamidomethylation | 147.38 | 528.9384 | 1584.805 | -0.0044 | -2.8  | 5.21 | 29110.6  | 4.57 HUMAN  | PI2004  | Proliferating cell nuclear antigen                                   |                                                           |
| 5913 | dirMS_041712_NAR_40mM_minus2.14523.14523.3 | 3 | 12.49 | 1 | 1.11E-06 M168m | (RIEALLA)(R I E L A L A G M V D P A F K D E K I)          | m.Oxidized methionine    | 171    | 634.338  | 1884.999 | 16.0008 | 1.1   | 4.18 | 25148.6  | 6           | HUMAN   | F3D041                                                               | Peroxiredoxin-6                                           |
| 5914 | dirMS_041712_NAR_50mM_plus2.9259.9259.2    | 2 | 12.49 | 0 | 1.92E-05       | (KIVSAA)(K I V S A A G M A T F T F V T V G A E L T F K I) |                          | 137    | 654.0887 | 1620.835 | -0.0019 | -1.4  | 8.31 | 17306.6  | 9.12 HUMAN  | 3D0G3   | Transcription factor BTF3 (Fragment)                                 |                                                           |
| 5915 | dirMS_041712_NAR_50mM_plus2.14103.14103.3  | 3 | 12.49 | 0 | 3.40E-05       | (KISPAKIL)(K I S P A P P L A W V A A L Q G K I)           |                          | 144.85 | 500.2911 | 1468.874 | -0.0153 | -10.2 | 8.49 | 17549.1  | 10.39 HUMAN | ESR13   | DBP95 complex subunit KMA1567 (Fragment)                             |                                                           |
| 5916 | dirMS_041712_NAR_60mM_plus.12287.12287.3   | 3 | 12.49 | 0 | 2.05E-05       | (KILQAQNC)(K I L A Q N G W C V M V S H S R I)             |                          | 128.17 | 509.6261 | 1525.769 | 0.0055  | 3.6   | 9.75 | 47510.4  | 7.04 HUMAN  | P06733  | Alpha-enolase                                                        |                                                           |
| 5917 | dirMS_041712_NAR_20mM_plus.17529.17529.2   | 2 | 12.49 | 0 | 3.20E-04       | (KILFVNY)(K I L F V N I N D A A T I L R I)                |                          | 192.63 | 667.3752 | 1331.747 | -0.0043 | -3.2  | 5.84 | 58214.7  | 5.25 HUMAN  | B4DEM7  | T-complex protein 1 subunit theta                                    |                                                           |
| 5918 | dirMS_041712_NAR_20mM_plus2.18704.18704.2  | 2 | 12.49 | 0 | 9.94E-04       | (RILPWSR)(R I P W S C A S D A L P V R R I)                |                          | 151.4  | 754.3298 | 1507.667 | -0.0145 | -9.6  | 4.37 | 39548    | 5.89 HUMAN  | P55795  | Heterogeneous nuclear ribonucleoprotein H2                           |                                                           |
| 5919 | dirMS_041712_NAR_40mM_plus2.16167.16167.3  | 3 | 12.49 | 0 | 4.31E-04       | (KIVSAA)(K I V S A A G M A T F T F V T V G A E L T F K I) | C.carbonamidomethylation | 167.47 | 600.3182 | 1798.937 | -0.0003 | 0.2   | 5.32 | 52440.1  | 6           | HUMAN   | F8WJN3                                                               | Cleavage and polyadenylation-specificity factor subunit 6 |
| 5920 | dirMS_041712_NAR_50mM_plus2.22195.22195.3  | 3 | 12.49 | 1 | 5.40E-05       | (RIEALLA)(R I E L A L A G M V D P A F K D E K I)          |                          | 190.32 | 629.004  | 1884.999 | -0.0012 | -0.7  | 4.18 | 25148.6  | 6           | HUMAN   | F3D041                                                               | Peroxiredoxin-6                                           |
| 5921 | dirMS_041712_NAR_60mM_plus.17614.17614.3   | 3 | 12.49 | 1 | 4.55E-05       | (RIJAKLLG)(R I J A K L L G G V A L L D P R I)             |                          | 148.83 | 437.6093 | 1310.815 | -0.0021 | -1.6  | 8.79 | 106155.7 | 5.45 HUMAN  | BSM5E19 | Eukaryotic translation initiation factor 3 subunit C                 |                                                           |
| 5922 | dirMS_041712_NAR_120mM_minus.7931.7931.2   | 2 | 12.48 | 1 | 6.37E-04       | (KIVAVDA)(K I V A V D A V L K L E T K I)                  |                          | 97.5   | 518.7878 | 1036.567 | 0.001   | 1     | 6.04 | 22783.5  | 5.5 HUMAN   | P35759  | Myosin-9                                                             |                                                           |
| 5923 | dirMS_041712_NAR_30mM_plus2.12613.12613.2  | 2 | 12.48 | 0 | 2.85E-05       | (KILNGLV)(K I L N G L V D L K D P E L T K I)              |                          | 123.56 | 499.2763 | 1429.717 | -0.0028 | -2    | 4.03 | 16443.6  | 9.52 HUMAN  | PH3     | Neutral alpha-glucosidase AB                                         |                                                           |
| 5924 | dirMS_041712_NAR_30mM_plus2.9738.9738.3    | 3 | 12.48 | 1 | 9.58E-04       | (KINVDIK)(K I N V D I K V D L K D P E L T K I)            |                          | 123.92 | 457.5912 | 1370.753 | 0.0065  | 4.7   | 4.56 | 12424.8  | 5.71 HUMAN  | O14980  | Exportin-1                                                           |                                                           |
| 5925 | dirMS_041712_NAR_60mM_minus.15948.15948.3  | 3 | 12.48 | 0 | 1.65E-04       | (KILFGVPI)(K I L F G V P I V H N G R I)                   | C.carbonamidomethylation | 148.82 | 404.5628 | 1211.672 | -0.0025 | -1.7  | 9.75 | 29040.9  | 5.88 HUMAN  | HOYBL1  | Inositol monophosphatase 1 (Fragment)                                |                                                           |
| 5926 | dirMS_041712_NAR_60mM_plus.18281.18283.3   | 3 | 12.48 | 1 | 1.37E-05       | (KISLELTL)(R I S I E L E T U G L K Q V R S)               |                          | 163.05 | 508.9724 | 1614.906 | -0.0031 | -2.1  | 4.78 | 53377.8  | 5.74 HUMAN  | Q15149  | Plectin                                                              |                                                           |
| 5927 | dirMS_041712_NAR_20mM_plus.15597.15597.3   | 3 | 12.48 | 0 | 7.55E-04       | (RISFPMR)(R I S F P M R S F V N V L P L G G Q N G K I)    |                          | 179.37 | 499.2925 | 1478.791 | -0.0021 | -1.4  | 8.31 | 17306.6  | 9.12 HUMAN  | 3D1305  | Profilin 1 (Fragment)                                                |                                                           |
| 5928 | dirMS_041712_NAR_20mM_plus.8959.8959.2     | 2 | 12.48 | 1 | 4.41E-05 M161m | (KILSLEL)(K I L S L E L L E L N L P L G Q N G K I)        | m.Oxidized methionine    | 132.48 | 524.278  | 1031.555 | 15.9933 | -1.5  | 4.53 | 20203.9  | 6.24 HUMAN  | HOYG0   | Creatine kinase B-type (Fragment)                                    |                                                           |
| 5929 | dirMS_041712_NAR_30mM_plus2.17063.17063.2  | 2 | 12.48 | 0 | 2.27E-05       | (KJAGCNG)(K J A G C N G F I P C E L R I)                  |                          | 146.65 | 697.3217 | 1393.635 | -0.0005 | 3.6   | 6.05 | 37681.5  | 5.93 HUMAN  | D6R6F2  | Phosphoribosylaminoimidazole carboxylase                             |                                                           |
| 5930 | dirMS_041712_NAR_30mM_plus2.19980.20174.2  | 2 | 12.48 | 0 | 4.61E-06       | (RILYVTA)(R I L Y V T A V A V F R R I)                    |                          | 160.38 | 520.2996 | 1039.593 | -0.0016 | -1.5  | 8.75 | 40069.4  | 4.83 HUMAN  | E7EVR1  | Tubulin beta chain                                                   |                                                           |
| 5931 | dirMS_041712_NAR_30mM_plus2.15291.15291.3  | 3 | 12.48 |   |                |                                                           |                          |        |          |          |         |       |      |          |             |         |                                                                      |                                                           |



|      |                                            |   |       |   |          |                                                                         |        |          |          |         |       |      |          |       |       |        |                                                                                   |
|------|--------------------------------------------|---|-------|---|----------|-------------------------------------------------------------------------|--------|----------|----------|---------|-------|------|----------|-------|-------|--------|-----------------------------------------------------------------------------------|
| 6100 | dirMS_041712_NAR_20mM_minus.9315.9320.2    | 2 | 12.36 | 0 | 5.70E+05 | (KYVEQLQ)(K)E I E L V L Q S / L A G E (K)H                              | 143.25 | 569.2917 | 1137.579 | -0.0025 | -2.2  | 4.53 | 37.96E3  | 5.3   | HUMAN | F8VU64 | Keratin, type II cytoskeletal 8                                                   |
| 6101 | dirMS_041712_NAR_30mM_minus.9155.9311.2    | 2 | 12.36 | 0 | 6.20E+05 | (KIVTQAT)(K)Y V I G I A / T A / P L R (K)                               | 140.73 | 443.2601 | 885.515  | -0.0023 | -2.6  | 9.41 | 58214.7  | 5.25  | HUMAN | B4D6M7 | T-complex protein 1 subunit theta                                                 |
| 6102 | dirMS_041712_NAR_40mM_minus.1041.1023.3    | 3 | 12.36 | 0 | 2.23E+05 | (KIDSHSH)(K)D L I G I G A I V / I V L S / C A K (D)                     | 147.24 | 528.9353 | 1045.004 | -0.0004 | -2.8  | 5.81 | 291018.6 | 4.57  | HUMAN | F72406 | Proteasome activator complex subunit 1                                            |
| 6103 | dirMS_041712_NAR_40mM_minus.11323.11323.3  | 3 | 12.36 | 1 | 1.21E+05 | (KIDVPAT)(K)Y V I D P A T A T I S / V L R D / N (K)                     | 104.38 | 571.9828 | 1713.938 | -0.0043 | -2.5  | 4.43 | 42755    | 7.81  | HUMAN | T274C4 | T-complex protein 1 subunit delta                                                 |
| 6104 | dirMS_041712_NAR_40mM_minus.11612.11612.3  | 3 | 12.36 | 1 | 1.38E+04 | (RJDLAAL)(R)D L I A / A / Q D / V N S / L E G T A E R (L)               | 115.8  | 620.3199 | 1858.95  | -0.0053 | -2.9  | 4.32 | 285798.6 | 5.23  | HUMAN | ANG651 | Spectrin alpha chain, non-erythrocytic 1                                          |
| 6105 | dirMS_041712_NAR_50mM_minus.13192.13192.3  | 3 | 12.36 | 1 | 3.21E+05 | (RIJLPAWA)(R) L P A V Q / N / L D E / D L I R (K)                       | 142.87 | 646.3522 | 1397.045 | -0.003  | -1.6  | 4.56 | 118930.9 | 5.49  | HUMAN | P22314 | Ubiquitin-like modifier-activating enzyme 1                                       |
| 6106 | dirMS_041712_NAR_50mM_minus.2145.7.1454.3  | 3 | 12.36 | 1 | 1.40E+05 | (RIGGVVPA)(K)D G D V / P / R D V / V A / I / T (K)T                     | 150.42 | 537.6375 | 1051.517 | -0.0133 | -3.3  | 5.96 | 1864.7   | 4.95  | HUMAN | F5H023 | Tubulin alpha-1C chain                                                            |
| 6107 | dirMS_041712_NAR_50mM_minus.18832.18832.3  | 3 | 12.36 | 1 | 2.24E+06 | (RIJLLEAL)(R) L A / L E / L A / S / Q / A (K)                           | 183.72 | 461.6289 | 1382.873 | -0.0008 | -0.6  | 6.75 | 280326.9 | 5.48  | HUMAN | OT5369 | Filamin-B                                                                         |
| 6108 | dirMS_041712_NAR_60mM_minus.18769.18769.3  | 3 | 12.36 | 1 | 2.67E+05 | (KKNAGA)(K)N I A / G / A / D / L / L / K E / L (N)                      | 166.87 | 452.6004 | 1355.789 | -0.0026 | -2    | 6.07 | 13786.8  | 9.33  | HUMAN | B7Z451 | Transcription elongation factor A protein 1                                       |
| 6109 | dirMS_041712_NAR_120mM_plus.14365.14913.4  | 4 | 12.36 | 1 | 4.09E+06 | (KLDLQSG)(R) L K D S O I H D V / V / V / G / S / F / R (I)              | 130.30 | 460.2603 | 1838.013 | -0.0063 | -3.4  | 6.75 | 45508.6  | 5.55  | HUMAN | ABK7Q2 | Heat shock cognate 71 kDa protein                                                 |
| 6110 | dirMS_041712_NAR_120mM_plus.18194.18234.4  | 4 | 12.36 | 1 | 1.39E+06 | (KQYTIIDAK)(K)Y V T / D / A / P / H / G / H / D / R / I (N)             | 148.93 | 481.2587 | 1922.017 | -0.0041 | -2.1  | 6.75 | 50811.6  | 9.32  | HUMAN | Q05639 | Elongation factor 1 alpha 2                                                       |
| 6111 | dirMS_041712_NAR_120mM_plus.9392.9411.3    | 3 | 12.36 | 2 | 4.46E+05 | (KIDTQCV)(K)Y V I D / P / A / T / S / S / K / R (D)                     | 102.20 | 549.9473 | 1447.831 | -0.0001 | -0.1  | 8.75 | 37486.1  | 9.31  | HUMAN | P72406 | Heterogeneous nuclear ribonucleoproteins A2/B1                                    |
| 6112 | dirMS_041712_NAR_20mM_plus.11506.11506.2   | 2 | 12.36 | 0 | 1.09E+05 | (RIYAYDA)(R)Y A L / L / V / D / Y T E / T (K)                           | 151.57 | 669.3157 | 1337.626 | -0.0019 | -1.4  | 4.37 | 22956    | 8.8   | HUMAN | EPK925 | Cofilin-1                                                                         |
| 6113 | dirMS_041712_NAR_30mM_plus.10045.10045.2   | 2 | 12.36 | 0 | 2.67E+05 | (RIJLESLQ)(R) L I S E / L / Q / G / Q A E R (A)                         | 105.82 | 630.3143 | 1259.623 | -0.0013 | -1    | 4.25 | 266161   | 5.68  | HUMAN | EP9P00 | Epiplectin                                                                        |
| 6114 | dirMS_041712_NAR_30mM_plus.11659.11659.2   | 2 | 12.36 | 0 | 5.70E+05 | (RIJMGAE)(R)A / M / G / Q / A / L A / R (A)                             | 114.4  | 558.7944 | 1116.583 | -0.0015 | -1.3  | 6.05 | 80685.1  | 7.31  | HUMAN | PO5165 | Propionyl-CoA carboxylase alpha chain, mitochondrial                              |
| 6115 | dirMS_041712_NAR_30mM_plus.12234.1238.2    | 2 | 12.36 | 0 | 6.65E+05 | (RIGFSSVY)(R)Y G I / S / V P T A (R)                                    | 117.7  | 460.2971 | 1005.573 | -0.0011 | -1.2  | 8.75 | 24161.9  | 9.27  | HUMAN | FR2029 | SAP domain-containing ribonucleoprotein                                           |
| 6116 | dirMS_041712_NAR_30mM_plus.18022.18022.2   | 2 | 12.36 | 0 | 2.32E+05 | (RIJFNLDN)(R)T / L / N / D / L P / V / G / R (S)                        | 144.83 | 613.3465 | 1225.69  | -0.0042 | -3.4  | 5.84 | 18498.6  | 5.82  | HUMAN | H7C374 | Peroxiredoxin-4 (Fragment)                                                        |
| 6117 | dirMS_041712_NAR_30mM_plus.19788.19788.3   | 3 | 12.36 | 0 | 1.41E+05 | (KIGFARVA)(K)G F / A / F / Q / V / V / N (R)                            | 157.38 | 441.8907 | 1329.659 | -0.0011 | -0.8  | 6    | 15791.7  | 9.22  | HUMAN | B4D5SU | Heterogeneous nuclear ribonucleoproteins C1/C2                                    |
| 6118 | dirMS_041712_NAR_50mM_plus.14362.14542.3   | 3 | 12.36 | 0 | 2.26E+06 | (KIDMEAE)(K) Q / M / E / A / P / H / V / T / G / P / R (V)              | 143.97 | 540.2948 | 1168.873 | -0.0035 | -2.2  | 6.75 | 20859.5  | 4.85  | HUMAN | JKS253 | Eukaryotic initiation factor 4A1 (Fragment)                                       |
| 6119 | dirMS_041712_NAR_50mM_plus.17021.17021.3   | 3 | 12.36 | 1 | 3.71E+05 | (KILSNEV)(K) L S K E N / L M / V N / I / G / S / L S T / G / R (V)      | 167    | 505.0229 | 1975.064 | -0.0099 | -5    | 8.75 | 51099.4  | 8.43  | HUMAN | FRW810 | Uncharacterized protein                                                           |
| 6120 | dirMS_041712_NAR_50mM_plus.17494.17494.3   | 3 | 12.36 | 1 | 5.25E+05 | (KIVKJLA)(K)V K L A A V D A T V / N / Q / V / L A / S / R (I)           | 103.33 | 585.6736 | 1755.012 | -0.0061 | -3.5  | 8.72 | 33659.5  | 5.35  | HUMAN | EMWC05 | Protein disulfide-isomerase A6                                                    |
| 6121 | dirMS_041712_NAR_60mM_plus.12232.12361.3   | 3 | 12.36 | 1 | 6.83E+05 | (RIYJESPE)(R)Y / G / I / E / S / F / V / I / N / R (D)                  | 121.23 | 527.9264 | 1581.766 | -0.0099 | -0.6  | 4.68 | 58856.6  | 6.26  | HUMAN | QBWKF1 | Paraspeckle component 1                                                           |
| 6122 | dirMS_041712_NAR_120mM_minus.12624.12624.3 | 3 | 12.35 | 0 | 7.44E+05 | (KIVTAW)(K)T F / T A / W / C / N S / H / R (K)                          | 122.28 | 464.8871 | 1392.648 | -0.001  | -0.7  | 9.44 | 104488.3 | 5.36  | HUMAN | B2C3C5 | Actinin, alpha 2, isoform CRA_b                                                   |
| 6123 | dirMS_041712_NAR_30mM_minus.9647.9647.2    | 2 | 12.35 | 0 | 2.40E+05 | (KIDVAG)(K)Y A / M / D / V / I / G / V / E / R (N)                      | 144.48 | 752.355  | 1447.71  | 19.993  | -1.3  | 4    | 10949.3  | 5.26  | HUMAN | B4DQZ2 | 14-3-3 protein epsilon                                                            |
| 6124 | dirMS_041712_NAR_30mM_minus.17160.17160.2  | 2 | 12.35 | 0 | 2.76E+05 | (RIJLLATL)(R) L I / M / T / L / E / R (L)                               | 146.9  | 501.2871 | 1005.573 | -0.004  | -2.8  | 6    | 335136.6 | 6.01  | HUMAN | CL4204 | Cytosolic dyxin-1 heavy chain 1                                                   |
| 6125 | dirMS_041712_NAR_40mM_minus.13910.13910.3  | 3 | 12.35 | 0 | 5.98E+04 | (RIJLLEAG)(R) L I E A / L I E / G A V / L T / V S A P / R / D S / R (H) | 165.87 | 655.7054 | 1965.113 | -0.0081 | -4.1  | 6.07 | 27279.2  | 9.51  | HUMAN | AKC489 | tRNA splicing endonuclease 34 homolog (S. cerevisiae) (Fragment)                  |
| 6126 | dirMS_041712_NAR_60mM_minus.11233.11746.3  | 3 | 12.35 | 1 | 2.27E+05 | (KIDLEEG)(K) L V K E L E E / Q / V / L / D / N C A P (D)                | 125.35 | 630.3154 | 1888.932 | -0.0004 | -0.2  | 4.25 | 227783.5 | 5.55  | HUMAN | P35579 | Mysin-9                                                                           |
| 6127 | dirMS_041712_NAR_60mM_minus.15875.15934.3  | 3 | 12.35 | 1 | 3.10E+05 | (KIEKIDP)(K) L K L I D / I / I / P / Q / E / R (T)                      | 149.9  | 522.2935 | 1564.809 | -0.0034 | -2.2  | 4.68 | 83605    | 4.97  | HUMAN | PO8238 | Heat shock protein HSP 90 beta                                                    |
| 6128 | dirMS_041712_NAR_60mM_plus.11454.11554.3   | 3 | 12.35 | 0 | 2.73E+05 | (KIDVQV)(K)Y V I D / P / A / T / S / S / K / R (D)                      | 112.2  | 549.9473 | 1447.831 | -0.0001 | -0.1  | 8.75 | 37486.1  | 9.31  | HUMAN | P72406 | Protein disulfide isomerase family A, member 3, isoform CRA_b                     |
| 6129 | dirMS_041712_NAR_20mM_minus.11390.11521.3  | 3 | 12.35 | 0 | 2.68E+06 | (KIDVNA)(R)Q M / A / A / I / A / T / I (K)                              | 150.2  | 508.292  | 1015.578 | -0.0015 | -1.5  | 5.84 | 58626    | 4.95  | HUMAN | F5H023 | Tubulin alpha-1C chain                                                            |
| 6130 | dirMS_041712_NAR_20mM_minus.18733.18733.3  | 3 | 12.35 | 0 | 1.30E+05 | (KIVYDDG)(K)Y V D D G / L I / S / Q / V K (Q)                           | 106.20 | 488.6764 | 1462.815 | -0.0005 | -0.4  | 4.21 | 30947.9  | 6.47  | HUMAN | H8BQ34 | Pyruvate kinase                                                                   |
| 6131 | dirMS_041712_NAR_20mM_plus.18763.18763.3   | 3 | 12.35 | 0 | 1.15E+05 | (KIVGNQZ)(K)Y V D N O S L / V N / E / A / A / P / T A (R)               | 144.9  | 577.9842 | 1731.939 | -0.0008 | -0.4  | 5.97 | 36157.9  | 8.65  | HUMAN | Q13101 | Delta(3,5)-Delta(2,4)-dienoyl-CoA isomerase, mitochondrial                        |
| 6132 | dirMS_041712_NAR_30mM_plus.14357.14865.3   | 3 | 12.35 | 0 | 2.45E+05 | (KIDSGAE)(K)S V / I / G / S / V / V / I / G / V / R (N)                 | 128.13 | 547.2595 | 1009.127 | -0.0015 | -14.2 | 4.25 | 103538.9 | 6.52  | HUMAN | Q82423 | ATP-dependent RNA helicase DDX42                                                  |
| 6133 | dirMS_041712_NAR_30mM_plus.17535.17536.2   | 2 | 12.35 | 0 | 7.85E+05 | (KINIVYSR)(K)N / V / I / Y / S / V / G (G)                              | 144.45 | 475.2893 | 945.572  | -0.0004 | -0.4  | 8.59 | 12270.4  | 11.49 | HUMAN | B0ZV97 | 60S ribosomal protein L23                                                         |
| 6134 | dirMS_041712_NAR_40mM_plus.13511.13511.3   | 3 | 12.35 | 0 | 3.39E+05 | (RIYVAPDE)(R)Y / A / P / D / H E P / I L / U / T E / A / P / L N C (R)  | 164.5  | 652.0252 | 1954.064 | -0.0034 | -1.7  | 4.65 | 42344.8  | 5.39  | HUMAN | Q5G2R1 | Beta-actin-like protein 2                                                         |
| 6135 | dirMS_041712_NAR_40mM_plus.18349.18349.3   | 3 | 12.35 | 1 | 1.13E+05 | (KIDFEVY)(K)M F E / I / V / F / D / P / K / V / P E / K (Q)             | 174.54 | 593.6385 | 1778.903 | -0.0024 | -1.3  | 4.41 | 171285.3 | 7.06  | HUMAN | PO8714 | Bifunctional glutamate/proline-1RNA ligase                                        |
| 6136 | dirMS_041712_NAR_40mM_plus.19722.19723.3   | 3 | 12.35 | 0 | 3.56E+05 | (RIJDLDTY)(R) L I / D / T / V / L / P / L / V / E / T / K (Q)           | 185.2  | 596.9774 | 1770.927 | -0.0096 | -5.4  | 4.54 | 138084.9 | 5.52  | HUMAN | QB9V16 | Cullin-associated NEDD8-dissociated protein 1                                     |
| 6137 | dirMS_041712_NAR_40mM_plus.6445.6445.2     | 2 | 12.35 | 0 | 8.18E+04 | (RIVTDA)(R)T I / D / A / L A / T A (R)                                  | 96.73  | 480.7504 | 960.511  | 0.0006  | 0.7   | 8.81 | 61324.7  | 6.04  | HUMAN | P10809 | 60 kDa heat shock protein, mitochondrial                                          |
| 6138 | dirMS_041712_NAR_60mM_plus.12593.12895.3   | 3 | 12.35 | 1 | 1.28E+06 | (KIDJFPE)(K)D / L / P / F / E / S / E K E (R)                           | 123.67 | 462.2281 | 1384.663 | -0.0067 | 4.8   | 4.41 | 23020.5  | 4.53  | HUMAN | AK8K60 | Hepatoma-derived growth factor                                                    |
| 6139 | dirMS_041712_NAR_60mM_plus.17755.17755.3   | 3 | 12.35 | 1 | 1.13E+05 | (KIVVAIQ)(K)W / A / V / Q S / V S / A W P E K R (G)                     | 150.05 | 552.9655 | 1656.886 | -0.0037 | -2.2  | 8.75 | 6412.4   | 9.52  | HUMAN | JKS54  | Cytosolic non-specific dipeptidase (Fragment)                                     |
| 6140 | dirMS_041712_NAR_120mM_minus.20008.20008.3 | 3 | 12.34 | 0 | 7.83E+04 | (RIJLWHI)(R)N I / L / W / H / E / T / D / R (S)                         | 165.22 | 470.5897 | 1409.754 | 0.001   | 0.7   | 5.32 | 52204.6  | 5.82  | HUMAN | PE3151 | Serine/threonine protein phosphatase 2A 55 kDa regulatory subunit B alpha isoform |
| 6141 | dirMS_041712_NAR_30mM_plus.10462.10462.2   | 2 | 12.34 | 0 | 1.40E+05 | (KIDVLA)(K)Y A / M / D / V / I / G / V / E / R (N)                      | 144.48 | 752.355  | 1447.71  | 19.993  | -1.3  | 4    | 10949.3  | 5.26  | HUMAN | B4DQZ2 | 14-3-3 protein epsilon                                                            |
| 6142 | dirMS_041712_NAR_30mM_plus.14708.14708.2   | 2 | 12.34 | 0 | 5.00E+05 | (RIJTFDR)(R)T / F / I / V / R (I)                                       | 113.23 | 457.2246 | 913.441  | 0.0005  | 0.6   | 4.37 | 267260.7 | 5.95  | HUMAN | Q13053 | Actin-Cy3 carboxylase 1                                                           |
| 6143 | dirMS_041712_NAR_30mM_minus.16154.16154.2  | 2 | 12.34 | 0 | 3.19E+05 | (KILAVNM)(K)A / V / I / N / M / V / P / P / R (L)                       | 142.33 | 580.3178 | 1143.634 | 19.994  | -0.6  | 10.9 | 52204.6  | 4.77  | HUMAN | ANK228 | Putative tubulin beta chain-like protein ENSP0000290377                           |
| 6144 | dirMS_041712_NAR_50mM_minus.12353.12391.3  | 3 | 12.34 | 1 | 3.25E+05 | (KISDQIE)(K)S I / Q / E / Q / V / L / D / E S L R (K)                   | 138.1  | 639.9828 | 1917.94  | -0.0061 | -3.2  | 4.02 | 18289.2  | 5.09  | HUMAN | ABM7X0 | Rho GDP-dissociation inhibitor 1                                                  |
| 6145 | dirMS_041712_NAR_50mM_minus.15091.15200.3  | 3 | 12.34 | 1 | 1.33E+05 | (KIVSGL)(K)S V / I / G / S / V / V / I / G / V / R (N)                  | 152.37 | 452.9385 | 1356.81  | -0.0007 | -6.4  | 6.11 | 12899.6  | 6.59  | HUMAN | Q7L311 | Programmed cell death protein 5                                                   |
| 6146 | dirMS_041712_NAR_50mM_minus.15797.15797.3  | 3 | 12.34 | 0 | 3.64E+05 | (KISKPTN)(K)L V S / P T / N / F / P / L A N V A R (F)                   | 158.22 | 600.3221 | 1798.96  | -0.0081 | -4.5  | 8.75 | 60985.3  | 5.6   | HUMAN | Q75111 | Caspase-3                                                                         |
| 6147 | dirMS_041712_NAR_50mM_minus.16962.16962.3  | 3 | 12.34 | 0 | 6.67E+04 | (KIVJPLH)(K)Y A / P / L / V / L / V / P / L (K)                         | 164.72 | 474.2781 | 1420.831 | -0.0113 | -8    | 6.75 | 147553.6 | 6.73  | HUMAN | EY7E74 | Cytoplasmic FMN1-interacting protein 2                                            |
| 6148 | dirMS_041712_NAR_60mM_minus.1371.13721.3   | 3 | 12.34 | 1 | 2.57E+05 | (KIKAAEA)(K)K A V E A A V S / A A D / A / D / E E R (L)                 | 136.4  | 639.6429 | 1916.92  | -0.0054 |       |      |          |       |       |        |                                                                                   |



|      |                                           |   |       |           |                                                     |        |          |          |         |       |      |          |       |       |        |                                                                 |
|------|-------------------------------------------|---|-------|-----------|-----------------------------------------------------|--------|----------|----------|---------|-------|------|----------|-------|-------|--------|-----------------------------------------------------------------|
| 6318 | dirMS_041712_NAR_60mM_minus.12047.12047.3 | 3 | 12.23 | 1.656E+05 | (RISVYVNE(R)I/S/V/Y/N/E/A/T G K V Y/P R)A)          | 127.47 | 606.3103 | 1816.923 | -0.005  | -3.6  | 8.43 | 27549.9  | 4.39  | HUMAN | EP8B4  | Tubulin beta chain                                              |
| 6319 | dirMS_041712_NAR_60mM_minus.18420.18420.3 | 3 | 12.23 | 1.129E+05 | (RIRFDE(R)R F/D E L)E(A)I/S/D)G(V)M V A R)G)        | 164.42 | 607.9739 | 1821.916 | -0.002  | -5.1  | 4.32 | 18466.1  | 5.78  | HUMAN | H3B93J | Pyruvate kinase (Fragment)                                      |
| 6320 | dirMS_041712_NAR_120mM_plus.0659.1659.3   | 3 | 12.23 | 1.715E+05 | (RIVYVNE(R)Y/F/A/D)I/S/E/A/N R N N D A L R)Q)       | 109.97 | 574.7784 | 1544.757 | -0.001  | -0.2  | 6.3  | 2006.    | 6.53  | HUMAN | ENH95  | Selenium binding protein 1 (Fragment)                           |
| 6321 | dirMS_041712_NAR_120mM_plus.20636.2103.4  | 4 | 12.23 | 2.132E+07 | (RIJAEKAE(R)R F/D E L)E(A)I/S/D)G(V)M V A R)G)      | 160.37 | 500.2814 | 1998.105 | -0.005  | -0.7  | 5.85 | 23729.5  | 9.89  | HUMAN | CN92L  | Non-POU domain-containing octamer-binding protein (Fragment)    |
| 6322 | dirMS_041712_NAR_20mM_plus.14927.14927.2  | 2 | 12.23 | 0.123E+05 | (RIJLVNPP(R)I/L/V)E(A)I/S/D)G(V)M V A R)G)          | 174.48 | 673.3693 | 1345.736 | -0.0049 | -3.6  | 4.53 | 267260.7 | 5.95  | HUMAN | IC3085 | Acetyl-CoA carboxylase 1                                        |
| 6323 | dirMS_041712_NAR_20mM_plus.18682.18682.3  | 3 | 12.23 | 0.188E+04 | (RIAPVPS(R)A P V P A S E L)E(A)I/S/D)G(V)M V A R)G) | 199.92 | 522.9655 | 1566.885 | -0.003  | -1.9  | 6.05 | 533778   | 5.74  | HUMAN | Q15149 | Plectin                                                         |
| 6324 | dirMS_041712_NAR_20mM_plus.7403.7403.2    | 2 | 12.23 | 0.236E+05 | (RITGDAP(R)G Q I A I P G P F T I A A V K)K)         | 115.52 | 714.8394 | 1422.871 | -0.0059 | -1.5  | 8.16 | 11447.2  | 9.93  | HUMAN | C3I9F7 | Cytosolic chromatin (Fragment)                                  |
| 6325 | dirMS_041712_NAR_30mM_plus.18176.18176.2  | 2 | 12.23 | 0.206E+05 | (RIQITLND(R)R)T(L)N/D)P/V)G(S)R)                    | 147.97 | 613.3465 | 1225.691 | -0.0042 | -3.4  | 5.84 | 18498.6  | 5.82  | HUMAN | HC7C4  | Peroxiredoxin 4 (Fragment)                                      |
| 6326 | dirMS_041712_NAR_30mM_plus.23524.23524.2  | 2 | 12.23 | 0.180E+05 | (RIJAIYEL(R)I/A)I/V)E(L)F)K)E)                      | 190.25 | 555.3311 | 1109.661 | -0.0016 | -1.4  | 6    | 19924.8  | 9.99  | HUMAN | F6U211 | 40S ribosomal protein S10                                       |
| 6327 | dirMS_041712_NAR_30mM_plus.9391.9391.1    | 2 | 12.23 | 0.690E+05 | (RIVSFG(K)K)S)E)I(A)I/A)E L S)P)K)                  | 103.03 | 538.2855 | 1075.563 | -0.007  | -0.7  | 4.53 | 12311.5  | 11.14 | HUMAN | FS9K8  | Parathyrimin                                                    |
| 6328 | dirMS_041712_NAR_40mM_plus.16562.16562.3  | 3 | 12.23 | 1.247E+05 | (RIVTSSG(R)T)T)F)E L)D)Y)G)G)I)E L L)K)A)           | 163.87 | 611.6744 | 1833.012 | -0.003  | -1.6  | 6.04 | 260161   | 5.68  | HUMAN | EP9P0  | Epipkain                                                        |
| 6329 | dirMS_041712_NAR_40mM_plus.2533.5531.2    | 2 | 12.23 | 0.401E+05 | (RIVNKK(R)R)I)E)I(A)I/V)E(L)F)K)E)                  | 80.2   | 541.2425 | 1064.427 | -0.0049 | -0.6  | 5.84 | 50199.2  | 6.2   | HUMAN | ENH95  | Tubulin beta-beta chain-like protein LOC260334                  |
| 6330 | dirMS_041712_NAR_50mM_plus.11845.11845.3  | 3 | 12.23 | 1.379E+05 | (RIGKIDRE(K)G)I)E I E)D)T)P)I)P)S)D)R)K)            | 130.28 | 585.9784 | 1755.924 | -0.0029 | -1.7  | 4.56 | 16443.6  | 10.45 | HUMAN | PE2263 | 40S ribosomal protein S14                                       |
| 6331 | dirMS_041712_NAR_50mM_plus.16889.16889.3  | 3 | 12.23 | 1.857E+05 | (KILFTAES(K)I)F)T)A)E)I)G)K)N)P)E)K)                | 157.48 | 553.9791 | 1659.932 | -0.0089 | -5.3  | 6.14 | 62195.8  | 5.63  | HUMAN | BDYWE  | Archin 1, isoform CRA_a                                         |
| 6332 | dirMS_041712_NAR_50mM_minus.10704.10704.3 | 3 | 12.22 | 0.272E+05 | (RIVFIGN(K)Y)F)E)G)N)P)T)S)I)F)T)K)I)               | 129.18 | 570.3302 | 1708.902 | -0.0066 | -1.9  | 6.07 | 63374.2  | 8.64  | HUMAN | PG6744 | Glucose-6-phosphate isomerase                                   |
| 6333 | dirMS_041712_NAR_50mM_minus.11262.11262.3 | 3 | 12.22 | 1.186E+05 | (RIQNDK(R)D)N)C)Q)A)I)P)P)E)P)T)I)Y)K)              | 132.05 | 515.9424 | 1542.827 | -0.0038 | -2.5  | 6.07 | 44237.3  | 7.81  | HUMAN | ETK06E | T-complex protein 1 subunit alpha                               |
| 6334 | dirMS_041712_NAR_50mM_minus.11415.11415.3 | 3 | 12.22 | 0.235E+04 | (RIJUAQPP(R)I)A)E)Q)P)P)H)P)I)G)R)                  | 129.58 | 514.6039 | 1541.887 | -0.0017 | -1.1  | 6.75 | 20915.7  | 6.45  | HUMAN | CN913  | Phosphoserine phosphatase (Fragment)                            |
| 6335 | dirMS_041712_NAR_50mM_minus.12778.12778.3 | 3 | 12.22 | 1.416E+05 | (RIVGGGL(K)Q)G)Q)I)G)P)M)N)I)P)I)V)S)D)P)K)R)T)     | 140.45 | 598.988  | 1778.558 | 15.9913 | -2    | 8.75 | 22382.2  | 8.65  | HUMAN | Q68830 | Peroxiredoxin-1                                                 |
| 6336 | dirMS_041712_NAR_50mM_minus.14959.14959.3 | 3 | 12.22 | 1.963E+05 | (RIQDVFEL(R)D)I)D)F)E)I)K)E)G)E)K)                  | 153.85 | 464.5852 | 1391.742 | -0.0006 | -0.4  | 4.32 | 49982    | 5.86  | HUMAN | BD4D8  | T-complex protein 1 subunit epsilon                             |
| 6337 | dirMS_041712_NAR_60mM_minus.13061.13061.3 | 3 | 12.22 | 1.207E+05 | (RIFALDS(K)Y)F)A)D)I)S)E)A)N R N N D A L R)Q)       | 122.5  | 592.9581 | 1776.862 | -0.0026 | -1.5  | 4.56 | 49709.6  | 5.19  | HUMAN | BDYIC4 | Vimentin                                                        |
| 6338 | dirMS_041712_NAR_60mM_minus.12203.12203.3 | 3 | 12.22 | 0.377E+05 | (RIVTNE(R)K)W)N)E)F)V)H)N)I)A)N L R)Q)              | 127.53 | 476.5974 | 1427.764 | 0.0135  | 9.5   | 6.77 | 18317.8  | 6.19  | HUMAN | B723E2 | Serine/threonine-protein phosphatase 6 catalytic subunit        |
| 6339 | dirMS_041712_NAR_120mM_plus.8136.8136.3   | 3 | 12.22 | 1.476E+05 | (RISDVS(V)R)S)D)S)I)V)S)W)S)D)T)R)K)                | 95.73  | 432.5393 | 1295.598 | 0.0059  | 4.5   | 5.68 | 116336.3 | 8.59  | HUMAN | GV3220 | Transcription elongation regulator 1                            |
| 6340 | dirMS_041712_NAR_20mM_plus.17562.17562.3  | 3 | 12.22 | 0.632E+04 | (RIVTNT(K)K)I)T)M)T)E)L)Q)Q)I)Q)A)S)I)A)N)K)        | 192.92 | 562.6233 | 1685.943 | -0.0009 | -0.5  | 6    | 34221.3  | 6.44  | HUMAN | PI5924 | Desmoplakin                                                     |
| 6341 | dirMS_041712_NAR_20mM_plus.11100.11100.2  | 2 | 12.22 | 0.533E+05 | (KIVALENA(K)I)M)I)E)I)S)E)A)N)R)Q)                  | 111.05 | 443.2607 | 885.551  | -0.0011 | -1.3  | 6.05 | 33605.6  | 6.56  | HUMAN | ADN111 | Ubiquitin fusion degradation protein 1 homolog                  |
| 6342 | dirMS_041712_NAR_120mM_plus.13846.13846.2 | 2 | 12.22 | 0.401E+05 | (RITFGD(K)T)I)Q)E)I)A)K)K)K)                        | 125.82 | 474.7784 | 948.551  | -0.0019 | -1.9  | 8.41 | 52385    | 7.18  | HUMAN | BD4D8  | Heat shock cognate 71 kDa protein (Fragment)                    |
| 6343 | dirMS_041712_NAR_30mM_plus.15955.16310.2  | 2 | 12.22 | 0.342E+06 | (RIVYFKS(R)Y)I)E)I)F)K)S)                           | 135.82 | 406.7314 | 812.455  | 0.0003  | 0.3   | 6    | 24249.1  | 6.99  | HUMAN | DR68M0 | Heterogeneous nuclear ribonucleoprotein H (Fragment)            |
| 6344 | dirMS_041712_NAR_30mM_plus.7035.7057.2    | 2 | 12.22 | 0.258E+05 | (KIMAQD(K)M)I)Q)D)A)K)G)                            | 91.35  | 415.6961 | 101.381  | 0.0035  | 4.3   | 5.59 | 56491.1  | 7.78  | HUMAN | BD4D2G | Elongation factor 1-gamma                                       |
| 6345 | dirMS_041712_NAR_30mM_plus.7235.7377.2    | 2 | 12.22 | 0.714E+04 | (RIVSQNS(R)E)I)I)H)N)S)R)K)                         | 93.52  | 415.7394 | 830.473  | -0.0015 | -1.8  | 6.1  | 15838.9  | 7.03  | HUMAN | HOY5U0 | Propionyl-CoA carboxylase alpha chain, mitochondrial (Fragment) |
| 6346 | dirMS_041712_NAR_30mM_plus.8309.8309.2    | 2 | 12.22 | 0.389E+05 | (RIVSGLS(R)I)E)I)G)E)I)S)E)A)N)R)Q)                 | 112.28 | 565.1128 | 1186.017 | -0.0017 | -1.5  | 8.75 | 21296.2  | 6.95  | HUMAN | CN913  | Nuclear receptor coactivator 1                                  |
| 6347 | dirMS_041712_NAR_40mM_plus.10662.10662.2  | 2 | 12.22 | 0.756E+04 | (RILSSQLS(R)S)E)I)S)Q)S)F)R)K)                      | 127.93 | 533.7789 | 1065.553 | -0.0022 | -2.1  | 6    | 69661.6  | 9.75  | HUMAN | Q56P66 | RNA-binding protein 14                                          |
| 6348 | dirMS_041712_NAR_40mM_plus.12072.14072.3  | 3 | 12.22 | 1.878E+04 | (RIVTGLE(R)S)T)G)U)E)I)T)P)S)I)P)V)K)N)             | 147.83 | 566.6552 | 1697.668 | -0.0173 | -10.2 | 5.86 | 34828    | 9.99  | HUMAN | FSH5K4 | Serine/threonine-protein phosphatase 1 regulatory subunit 1D    |
| 6349 | dirMS_041712_NAR_50mM_plus.13559.13559.3  | 3 | 12.22 | 0.158E+07 | (RIQLDHP(R)I)D)N)I)P)S)F)E)K)                       | 138.68 | 450.9258 | 1350.763 | 0.0011  | 0.1   | 5.32 | 7304.3   | 9.39  | HUMAN | G3KAN0 | 40S ribosomal protein S20                                       |
| 6350 | dirMS_041712_NAR_50mM_plus.12373.12373.2  | 2 | 12.22 | 0.386E+05 | (RIVHFGS(R)W)F)G)I)D)F)I)G)G)Q)K)                   | 129.5  | 475.7398 | 950.556  | -0.0008 | -0.6  | 4.65 | 31075.3  | 6.60  | HUMAN | PE0174 | Triosephosphate isomerase                                       |
| 6351 | dirMS_041712_NAR_30mM_minus.11564.11564.2 | 2 | 12.21 | 0.367E+05 | (RIRKEMAE(R)E)I)A)E)I)A)Y)G)T)K)                    | 115.85 | 497.365  | 993.525  | -0.0004 | -2.4  | 4.53 | 17973    | 5.16  | HUMAN | EP9165 | Heat shock cognate 71 kDa protein (Fragment)                    |
| 6352 | dirMS_041712_NAR_30mM_minus.9616.9633.2   | 2 | 12.21 | 1.736E+05 | (KIVYKPG(K)I)Y)K)P)G)E)A)I)E)I)P)E)                 | 106.8  | 573.7932 | 1146.579 | 0.0024  | 2.1   | 6.04 | 30492.9  | 5.26  | HUMAN | P21964 | Catechol O-methyltransferase                                    |
| 6353 | dirMS_041712_NAR_40mM_minus.8309.8309.3   | 3 | 12.21 | 0.389E+05 | (RILKLEP(R)R)E)I)G)P)K)P)E)I)A)Q)Q)I)R)K)           | 129.42 | 560.3204 | 1678.949 | -0.0017 | -1.2  | 6.14 | 139883.7 | 8.06  | HUMAN | PS3621 | Coatomer subunit alpha                                          |
| 6354 | dirMS_041712_NAR_50mM_minus.18177.18177.3 | 3 | 12.21 | 1.247E+05 | (RILKAEEL(K)K)E)A)E)I)E)I)P)M)P)A)R)I)A)            | 117.27 | 574.9957 | 1722.982 | -0.0097 | -5.6  | 4.79 | 56104.6  | 6.01  | HUMAN | EP9P73 | Coatomer subunit beta (Fragment)                                |
| 6355 | dirMS_041712_NAR_50mM_minus.5853.5853.3   | 3 | 12.21 | 4.338E+04 | (RIRKEMAE(R)E)I)A)E)I)A)Y)G)T)K)                    | 92.45  | 483.9522 | 1446.716 | 0.0023  | 1.5   | 4.79 | 15560.9  | 6.19  | HUMAN | BL19   | FLYWC1 family member 2                                          |
| 6356 | dirMS_041712_NAR_120mM_plus.15728.15862.4 | 4 | 12.21 | 9.972E+05 | (RIVGVLQ(K)G)Q)I)G)U)I)N)Y)K)A)P)G)G)D)N)K)         | 136.27 | 464.5161 | 1855.055 | -0.0123 | -6.6  | 9.99 | 61224.7  | 5.7   | HUMAN | PI0809 | 60 kDa heat shock protein, mitochondrial                        |
| 6357 | dirMS_041712_NAR_120mM_plus.17308.17400.4 | 4 | 12.21 | 1.785E+04 | (RIGVGHG(K)Y)F)G)H)A)I)P)D)Y)S)A)C)K)R)I)           | 144.95 | 487.5024 | 1948.991 | -0.0028 | -1.4  | 8.6  | 21005.6  | 5.12  | HUMAN | Q04760 | Lactoylglutathione lyase                                        |
| 6358 | dirMS_041712_NAR_120mM_plus.6632.6632.2   | 2 | 12.21 | 0.307E+05 | (RISHGET(R)S)H)E)I)E)T)Y)A)I)Y)K)                   | 88.3   | 581.7777 | 1162.549 | -0.0006 | -0.5  | 5.38 | 16510    | 11.51 | HUMAN | J3K5R8 | Serine/arginine-rich-splicing factor 1 (Fragment)               |
| 6359 | dirMS_041712_NAR_120mM_plus.15484.15484.2 | 2 | 12.21 | 0.386E+05 | (RIVTVEP(R)T)I)I)A)E)I)S)E)A)N)R)Q)                 | 119.48 | 681.2671 | 1349.713 | -0.0018 | -1.8  | 6.21 | 119224.2 | 6.18  | HUMAN | ENH95  | Heat shock cognate 71 kDa protein (Fragment)                    |
| 6360 | dirMS_041712_NAR_20mM_plus.1712.1717.2    | 2 | 12.21 | 0.806E+04 | (RIVNPIHA(K)M)N)I)P)I)A)N)A)K)                      | 189.38 | 490.8283 | 980.605  | -0.001  | -1    | 8.72 | 51212    | 5.84  | HUMAN | AN6FQ9 | Septin-8                                                        |
| 6361 | dirMS_041712_NAR_30mM_plus.12198.12001.2  | 2 | 12.21 | 0.207E+05 | (RIGLGGDA(K)R)I)I)G)D)P)A)P)D)I)P)K)G)              | 115.62 | 562.7857 | 1124.57  | -0.0014 | -4.7  | 4.21 | 63055.8  | 6.41  | HUMAN | ET7EWA | Cleavage stimulation factor subunit 2                           |
| 6362 | dirMS_041712_NAR_30mM_plus.14125.14126.2  | 2 | 12.21 | 0.323E+05 | (RIVYDAP(R)Y)I)D)I)A)N)P)C)N)K)G)                   | 127.05 | 653.8256 | 1306.646 | -0.0021 | -1.6  | 5.83 | 33022.6  | 4.78  | HUMAN | AN6D09 | Protein RPSAP58                                                 |
| 6363 | dirMS_041712_NAR_30mM_plus.14455.14597.2  | 2 | 12.21 | 0.532E+05 | (RIVHFGS(R)W)F)G)I)D)F)I)G)G)Q)K)                   | 129.5  | 475.7398 | 950.556  | -0.0008 | -0.6  | 4.65 | 31075.3  | 6.19  | HUMAN | CN913  | Probable ATP-dependent RNA helicase DDX15                       |
| 6364 | dirMS_041712_NAR_30mM_plus.16620.16629.2  | 2 | 12.21 | 0.386E+04 | (RIGLGEWK(K)G)I)E)I)W)V)G)E)I)P)                    | 140.05 | 531.2766 | 1061.545 | 0.0011  | 1     | 6    | 14914.1  | 6.84  | HUMAN | PE2598 | 40S ribosomal protein S12                                       |
| 6365 | dirMS_041712_NAR_30mM_plus.21205.21205.2  | 2 | 12.21 | 0.187E+05 | (RIVTLMW(R)R)T)G)U)E)I)S)E)A)N)R)Q)                 | 165.82 | 674.8389 | 1348.672 | -0.0013 | -1    | 8.75 | 61018.6  | 9.44  | HUMAN | BD4LW8 | Probable ATP-dependent RNA helicase DDX15                       |
| 6366 | dirMS_041712_NAR_30mM_plus.21728.21728.2  | 2 | 12.21 | 0.829E+04 | (KIVGVAQ(K)G)Q)I)G)U)I)N)Y)K)A)P)G)G)D)N)K)         | 169.4  | 738.3899 | 1475.796 | -0.0006 | -4.1  | 9.75 | 36914.7  | 6.33  | HUMAN | PI4550 | Alcohol dehydrogenase (NADP+)                                   |
| 6367 | dirMS_041712_NAR_30mM_plus.9603.9603.2    | 2 | 12.21 | 0.136E+06 | (RIVGSLV(K)R)I)S)S)G)S)G)S)F)E)K)                   | 104.9  | 538.2855 | 1075.574 | -0.0105 | -9.8  | 6    | 20576.9  | 9.84  | HUMAN | FW804  | Heat shock protein beta-1                                       |
| 6368 | dirMS_041712_NAR_30mM_plus.982.982.3      |   |       |           |                                                     |        |          |          |         |       |      |          |       |       |        |                                                                 |







|      |                                            |   |       |           |                                                            |       |         |          |          |         |       |        |         |         |       |         |                                                                         |                                          |
|------|--------------------------------------------|---|-------|-----------|------------------------------------------------------------|-------|---------|----------|----------|---------|-------|--------|---------|---------|-------|---------|-------------------------------------------------------------------------|------------------------------------------|
| 6645 | dirMS_041712_NAR_40mM_plus2.17854.17854.3  | 3 | 12.03 | 0.166E+05 | (KILAKPLSK)(K)A/K P L S S L V T P L I M A A K E            |       | 17.17   | 552.0052 | 1653.997 | 0.0039  | 2.3   | 10     | 24711.4 | 5.19    | HUMAN | C7C193  | PAK-2p34 (Fragment)                                                     |                                          |
| 6646 | dirMS_041712_NAR_40mM_plus2.7620.7620.2    | 2 | 12.03 | 0.166E+05 | (RIGLDFTR)(R) G V F D E P/R/R                              |       | 104.47  | 437.1906 | 873.374  | -0.0002 | 0.2   | 437    | 22761.5 | 9.91    | HUMAN | C36W07  | Creatine kinase U-type, mitochondrial (Fragment)                        |                                          |
| 6647 | dirMS_041712_NAR_40mM_plus2.9016.9016.2    | 0 | 12.03 | 0.839E+04 | (KIDSDQK)(K)G S V D F A T Q E A R L R                      |       | 540.72  | 540.72   | 1098.47  | -0.0001 | 0.1   | 540.72 | 540.72  | 6.82    | HUMAN | NS00002 | Heterogeneous nuclear ribonucleoprotein K                               |                                          |
| 6648 | dirMS_041712_NAR_50mM_plus2.15454.15494.3  | 3 | 12.03 | 0.151E+06 | (RISLDFTR)(R) A I S T L V H L V E G V I Q A A N D/A A/R/K  | C     | 1456.68 | 657.6802 | 1971.029 | -0.0004 | -1.7  | 5.32   | 71165.3 | 5.57    | HUMAN | IKS313  | Claflin heavy chain 1                                                   |                                          |
| 6649 | dirMS_041712_NAR_60mM_plus2.12243.12394.3  | 3 | 12.03 | 0.197E+05 | (K)TTPKQIK)(K) P Q V Q V D I G G Q G Q K T I K             |       | 124.12  | 535.6249 | 1604.864 | -0.0041 | -2.6  | 8.17   | 72445.7 | 5.07    | HUMAN | P11021  | 78 kDa glucose-regulated protein                                        |                                          |
| 6650 | dirMS_041712_NAR_60mM_plus2.18453.18453.3  | 3 | 12.03 | 1.709E+05 | (R)IRIDSLR)(R) R I D S I S V A L A L S V L Q I Q T K       |       | 153.97  | 567.3254 | 1699.97  | -0.0085 | -5    | 8.75   | 61336.9 | 5.83    | HUMAN | DBR403  | Prelamin-A/C                                                            |                                          |
| 6651 | dirMS_041712_NAR_60mM_plus2.7300.7300.2    | 1 | 12.03 | 1.158E+06 | (R)IAAPGAE)(R) A P P G A E I P P A P K R A R               |       | 96.2    | 1.584048 | 1204.91  | -0.0001 | 0.1   | 96.2   | 1204.91 | 6.21    | HUMAN | NS00002 | Non-POU domain-containing octamer-binding protein                       |                                          |
| 6652 | dirMS_041712_NAR_120mM_minus.7053.7093.3   | 3 | 12.02 | 1.374E+05 | (K)IDSDVQ)(K)D S V F V G E A Q S K R/R                     |       | 92.47   | 452.2134 | 1354.623 | 0.0023  | 1.7   | 4.56   | 32616.5 | 5.18    | HUMAN | ANL176  | Actin, alpha skeletal muscle                                            |                                          |
| 6653 | dirMS_041712_NAR_120mM_minus.7296.7296.3   | 3 | 12.02 | 1.149E+06 | (R)CREMDR)(R) C R E M V D E I Q/L/R/I                      | C     | 93.97   | 412.8591 | 1236.546 | 0.0168  | 13.6  | 4.68   | 33450.2 | 4.76    | HUMAN | IKN667  | Tropomyosin alpha-3 chain                                               |                                          |
| 6654 | dirMS_041712_NAR_120mM_minus.8557.8557.3   | 3 | 12.02 | 1.419E+05 | (R)KLVTEG)(R) K V L T V E G E P P/R/L/R                    |       | 100.63  | 416.885  | 1248.658 | -0.0178 | -14.3 | 6.14   | 96827.3 | 5.58    | HUMAN | EPN0U7  | Neural alpha-glucosidase AB                                             |                                          |
| 6655 | dirMS_041712_NAR_30mM_plus2.13749.13849.2  | 2 | 12.02 | 0.222E+05 | (R)SDSYTR)(R) S I S L V Y T G F R/G                        |       | 128.27  | 580.7949 | 1160.583 | -0.0009 | -0.7  | 5.72   | 32053.1 | 5.29    | HUMAN | HTF816  | Neutelin (Fragment)                                                     |                                          |
| 6656 | dirMS_041712_NAR_30mM_plus2.16174.16174.2  | 2 | 12.02 | 1.406E+05 | (R)KIDSDVQ)(K)G S V D F A T Q E A R L R                    | M185M | 142.47  | 580.3137 | 1143.838 | -0.0018 | 0.8   | 9.75   | 42238.8 | 6.49    | HUMAN | NS00002 | Positive tubulin beta chain-like protein ENSP0000290377                 |                                          |
| 6657 | dirMS_041712_NAR_50mM_minus2.14167.14167.3 | 3 | 12.02 | 1.131E+05 | (R)IQFVPK)(R) F V P V K V E E Q/L/E A T G P G R L          |       | 148.68  | 623.6775 | 1869.023 | -0.0049 | -2.6  | 6.14   | 55287.2 | 6.08    | HUMAN | BZS296  | Thioredoxin reductase 1, cytoplasmic                                    |                                          |
| 6658 | dirMS_041712_NAR_50mM_minus2.7421.7421.3   | 3 | 12.02 | 1.472E+04 | (R)IYDLNK)(R) I Y D L N K P E A E Q/L/E A T G P G R L      |       | 109.18  | 472.9187 | 1416.737 | 0.0046  | 3.3   | 4.68   | 28733.7 | 4.82    | HUMAN | IDA0V0  | Serine-threonine kinase receptor-associated protein                     |                                          |
| 6659 | dirMS_041712_NAR_60mM_minus.17174.17272.3  | 3 | 12.02 | 1.110E+05 | (R)ICRVDP)(R) C R V D V L P A L V L S V L K M              | C     | 156     | 457.5982 | 1370.782 | -0.0024 | -1.7  | 8.75   | 7765.6  | 8.23    | HUMAN | H3836A  | dCTP pyrophosphatase 1                                                  |                                          |
| 6660 | dirMS_041712_NAR_60mM_minus.7842.7843.3    | 3 | 12.02 | 1.471E+05 | (K)IDSDQK)(K) Q Q E G I P P P D Q Q L R/L                  |       | 109.4   | 508.1952 | 1512.781 | -0.0024 | -1.6  | 5.46   | 12771.6 | 6.75    | HUMAN | BD4172  | Ubiquitin                                                               |                                          |
| 6661 | dirMS_041712_NAR_20mM_plus2.13962.13962.2  | 2 | 12.02 | 0.612E+04 | (K)IYVNVLL)(K) V P N A L V E G A G K I A                   |       | 167.72  | 605.3616 | 1209.72  | -0.0042 | -3.5  | 6      | 50659.2 | 7.87    | HUMAN | BD41V2  | Citrate synthase                                                        |                                          |
| 6662 | dirMS_041712_NAR_20mM_plus2.17475.17475.3  | 3 | 12.02 | 0.228E+05 | M90m (R)IYVNVLL)(R) F V G V L P P D V T F E E M R K        | m     | 192.4   | 625.9762 | 1859.921 | 15.9933 | -0.9  | 4      | 23729.5 | 9.89    | HUMAN | C9Z17   | Non-POU domain-containing octamer-binding protein (Fragment)            |                                          |
| 6663 | dirMS_041712_NAR_20mM_plus2.74891.7489.2   | 2 | 12.02 | 0.240E+05 | (K)QVLTSE)(R) K V T L T S E A E E A R/L                    |       | 119.92  | 567.7865 | 1134.564 | 0.0027  | 1.8   | 4.25   | 39840.9 | 4.97    | HUMAN | F5H308  | Lactate dehydrogenase                                                   |                                          |
| 6664 | dirMS_041712_NAR_20mM_plus2.3061.3061.2    | 2 | 12.02 | 0.438E+05 | (K)LLIHEK)(K) L I I H E E G D/R/L                          |       | 132.78  | 528.278  | 1031.555 | -0.0033 | -1.5  | 4.53   | 20039.9 | 6.24    | HUMAN | HYV050  | Creatine kinase B-type (Fragment)                                       |                                          |
| 6665 | dirMS_041712_NAR_30mM_plus2.11815.11832.2  | 2 | 12.02 | 0.594E+04 | (R)IGCTATC)(R) C T I A N T A I G A F V A K I A             | C     | 116.57  | 570.2807 | 1139.551 | 0.0028  | 2.8   | 8.75   | 25381.9 | 10.49   | HUMAN | EP9007  | 40S ribosomal protein S2                                                |                                          |
| 6666 | dirMS_041712_NAR_30mM_plus2.14328.14328.2  | 2 | 12.02 | 0.357E+05 | (R)IJEAFR)(R) R L A F F Q S I K E                          |       | 128.28  | 468.2629 | 935.52   | -0.0011 | -1.2  | 6.1    | 30944.2 | 6.52    | HUMAN | BIQ2N1  | ATP-dependent RNA helicase DDX39A                                       |                                          |
| 6667 | dirMS_041712_NAR_40mM_plus2.9981.9981.2    | 2 | 12.02 | 0.248E+05 | (K)IEQFAE)(K) Q I I A F W/R/R                              |       | 122.88  | 418.706  | 836.405  | -0.0002 | -0.3  | 6.1    | 19924.8 | 9.99    | HUMAN | F6U211  | 40S ribosomal protein S10                                               |                                          |
| 6668 | dirMS_041712_NAR_40mM_plus2.11778.11778.3  | 3 | 12.02 | 1.742E+05 | (R)IYVNVLL)(R) N I V V Y I V A E G E K V P P R A           |       | 130.43  | 615.351  | 1843.934 | -0.0003 | -1.6  | 8.43   | 50286.6 | 4.79    | HUMAN | PH8713  | Tubulin beta-4b chain                                                   |                                          |
| 6669 | dirMS_041712_NAR_50mM_plus2.18803.18803.3  | 3 | 12.02 | 1.632E+05 | M18m (I)MQLQI)(I) M Q I L F S S V T L L K I G              |       | 166.62  | 598.6527 | 1777.952 | 15.9939 | -1.7  | 4.56   | 18601   | 5.19    | HUMAN | C7C245  | Translational endoplasmic reticulum ATPase (Fragment)                   |                                          |
| 6670 | dirMS_041712_NAR_50mM_plus2.8537.8537.3    | 3 | 12.02 | 1.216E+04 | (R)IAIDSS)(R) I A I D S N L K W D V S T A R Q V R          |       | 111.82  | 595.2868 | 1783.846 | 0.0002  | 0.1   | 4.43   | 46656.7 | 9.19    | HUMAN | Q5V473  | PC1 domain-containing protein 2                                         |                                          |
| 6671 | dirMS_041712_NAR_60mM_plus2.15412.15412.3  | 3 | 12.02 | 0.346E+05 | (K)ICDGTATC)(K) C G A T K V D V I G H S E R I R            | C     | 137.57  | 529.5842 | 1586.738 | 0.0001  | 0.0   | 5.32   | 31075.7 | 5.65    | HUMAN | PG0174  | Triosephosphate isomerase                                               |                                          |
| 6672 | dirMS_041712_NAR_60mM_minus2.13686.13686.3 | 3 | 12.01 | 1.115E+05 | (K)ILTOKA)(K) L T T D E A D V O Q S K A R L Q R/R          |       | 104.42  | 395.9939 | 1285.977 | -0.0004 | -1.9  | 4.56   | 90316.8 | 5.52    | HUMAN | Q13263  | Transcription intermediary factor 1-beta                                |                                          |
| 6673 | dirMS_041712_NAR_60mM_minus.7481.7481.2    | 2 | 12.01 | 1.403E+05 | (R)IYDLNK)(R) I Y D L N K P E A E Q/L/E A T G P G R L      |       | 109.18  | 472.9187 | 1416.737 | 0.0046  | 3.3   | 4.68   | 28733.7 | 4.82    | HUMAN | IDA0V0  | Serine-threonine kinase receptor-associated protein                     |                                          |
| 6674 | dirMS_041712_NAR_60mM_minus.7962.7962.3    | 3 | 12.01 | 1.484E+05 | (R)IYLAEA)(R) I A E A L V T A G Q S K A R L Q R/R          |       | 109.42  | 412.8902 | 1236.658 | -0.0012 | -1.8  | 6.14   | 28473.3 | 4.8     | HUMAN | PI6181  | 1.81-3.3 protein gamma                                                  |                                          |
| 6675 | dirMS_041712_NAR_20mM_plus2.7868.7868.2    | 2 | 12.01 | 1.214E+05 | (K)IIEVH)(K) E I I I I A N D Q G N K I                     |       | 124.5   | 614.8177 | 1228.628 | 0.0001  | 0.1   | 4.37   | 58702.6 | 6.09    | HUMAN | BD4XV3  | Heat shock 70 kDa protein 1-like                                        |                                          |
| 6676 | dirMS_041712_NAR_20mM_plus2.9827.9827.2    | 2 | 12.01 | 0.620E+03 | (K)IEEAPA)(K) F I E E I A P P A G I K S                    |       | 139.02  | 569.3276 | 1137.651 | -0.0035 | -1.1  | 4.53   | 66923.1 | 6.88    | HUMAN | EP9G35  | Methylcrotonoyl-CoA carboxylase subunit alpha, mitochondrial (Fragment) |                                          |
| 6677 | dirMS_041712_NAR_20mM_plus2.11808.11817.2  | 2 | 12.01 | 1.158E+05 | (R)ISLDFTR)(R) A I S T L V H L V E G V I Q A A N D/A A/R/K |       | 115.18  | 608.8357 | 1216.615 | -0.0009 | -3.2  | 5.56   | 35763.6 | 4.97    | HUMAN | Q2H0C5  | Nuclear receptor coactivator 5                                          |                                          |
| 6678 | dirMS_041712_NAR_30mM_plus2.12513.12998.2  | 2 | 12.01 | 1.444E+06 | (R)ITGDSQ)(R) T I T G I I S V P I P/R/R                    |       | 120.87  | 479.2725 | 957.536  | 0.0014  | 1.4   | 4.5    | 14749.1 | 12.2    | HUMAN | Q2D384  | 5S3 ribosomal protein L13 (Fragment)                                    |                                          |
| 6679 | dirMS_041712_NAR_30mM_plus2.17871.18016.2  | 2 | 12.01 | 0.359E+05 | (R)IIGGGL)(R) I G G L I A S L A D L R I G                  |       | 147.35  | 585.3347 | 1169.664 | -0.0016 | -1.3  | 5.84   | 34524.7 | 5.4     | HUMAN | ABMV37  | Protein SEC13 homolog                                                   |                                          |
| 6680 | dirMS_041712_NAR_30mM_plus2.23389.23351.2  | 2 | 12.01 | 0.211E+06 | (R)ILPFLR)(R) L I P L I A L F R R                          |       | 189.25  | 493.8049 | 986.603  | -0.0008 | -0.8  | 5.84   | 57391.2 | 6.29    | HUMAN | Q43175  | D-3-phosphoglycerate dehydrogenase                                      |                                          |
| 6681 | dirMS_041712_NAR_30mM_plus2.8620.8644.2    | 2 | 12.01 | 0.137E+06 | (K)IFDLDC)(K) F I C L D N D C A A R/S                      |       | 100.02  | 462.7168 | 924.424  | -0.0019 | -2.1  | 5.84   | 41827.5 | 7       | HUMAN | BZ7A79  | Phosphoglycerate kinase                                                 |                                          |
| 6682 | dirMS_041712_NAR_40mM_plus2.10437.10437.2  | 2 | 12.01 | 0.940E+04 | (K)IGDGTATC)(K) G I G T V P V G E G I A M G I N R I G      |       | 125.75  | 513.3081 | 1025.61  | -0.0013 | -2.1  | 9.75   | 50492.3 | 6.1     | HUMAN | PH8704  | Elongation factor 1-gamma 1                                             |                                          |
| 6683 | dirMS_041712_NAR_40mM_plus2.18444.18444.3  | 3 | 12.01 | 1.256E+04 | (R)IAEVGG)(R) A I E V G E V P V P L V P L N Q K X V I      |       | 174.58  | 646.716  | 1938.142 | -0.0088 | -4.5  | 8.5    | 18033.3 | 5.55    | HUMAN | EP9P11  | Ester hydrolase C11orf54 (Fragment)                                     |                                          |
| 6684 | dirMS_041712_NAR_40mM_plus2.13282.13282.3  | 3 | 12.01 | 1.249E+05 | (R)OIGMSP)(R) G V I S P V P I V N T S G K R I              |       | 137.03  | 568.292  | 1702.88  | -0.0015 | -1.8  | 10.8   | 953     | 61224.7 | 5.77  | HUMAN   | PI0809                                                                  | 60 kDa heat shock protein, mitochondrial |
| 6685 | dirMS_041712_NAR_50mM_plus2.16535.16535.3  | 3 | 12.01 | 0.289E+05 | (K)ICGSYF)(K) I C D S I V P L V D F V F R R                | C     | 154.4   | 568.9562 | 1704.853 | 0.0014  | 0.8   | 6.79   | 16650   | 9.47    | HUMAN | DR6R86  | 40S ribosomal protein S3a                                               |                                          |
| 6686 | dirMS_041712_NAR_50mM_plus2.11415.11415.2  | 2 | 12.01 | 1.452E+05 | (K)ITCFEVR)(K) C I F E V R I P L D R I R                   |       | 117.31  | 571.281  | 1711.713 | -0.0011 | -1.1  | 4.58   | 31223.6 | 4.68    | HUMAN | CA4A65  | Acetyl-CoA carboxylase beta                                             |                                          |
| 6687 | dirMS_041712_NAR_20mM_minus.14894.14894.2  | 2 | 12    | 0.193E+06 | (K)IEIDVLL)(K) E I I D A L V L S A L K I G                 |       | 200.03  | 543.3133 | 1085.62  | -0.0008 | -0.7  | 4.03   | 58642   | 4.95    | HUMAN | F5H3D3  | 40S ribosomal protein L13 (Fragment)                                    |                                          |
| 6688 | dirMS_041712_NAR_30mM_minus2.16557.16557.2 | 2 | 12    | 0.280E+05 | (R)IAJAEV)(R) A S L E A J A A D A Q R I G                  |       | 143.7   | 672.8404 | 1344.675 | -0.0019 | -1.4  | 4.14   | 56607.4 | 5.37    | HUMAN | F8VX84  | Keratin, type II cytoskeletal A                                         |                                          |
| 6689 | dirMS_041712_NAR_30mM_plus2.16910.16910.2  | 2 | 12    | 0.331E+05 | (K)FANFPF)(K) F A N P F P P A A V R                        |       | 146.35  | 545.2917 | 1089.584 | -0.0039 | -3.6  | 5.75   | 61363   | 8.73    | HUMAN | CJ0509  | Propionyl-CoA carboxylase beta chain, mitochondrial                     |                                          |
| 6690 | dirMS_041712_NAR_30mM_plus2.17494.17494.3  | 3 | 12    | 0.103E+06 | M195m (R)IMFGAG)(R) H F V P I P F A I P L T S R I G        |       | 107.33  | 546.2872 | 1020.883 | 16.0115 | 10.1  | 9.75   | 42238.8 | 4.97    | HUMAN | AN6N28  | Adipogenic- and RNA ligase, cytoplasmic                                 |                                          |
| 6691 | dirMS_041712_NAR_50mM_minus2.7936.7936.3   | 3 | 12    | 0.888E+04 | (K)ITAVEA)(K) T A V E A T P H E D V L L A N K I G          |       | 112.23  | 504.9229 | 1512.754 | 0.0001  | 0.1   | 4.31   | 28852.1 | 5.33    | HUMAN | EP91M5  | Lipopolysaccharide-responsive and beta-ig-like anchor protein           |                                          |
| 6692 | dirMS_041712_NAR_60mM_minus.15767.15767.3  | 3 | 12    | 1.294E+05 | (R)IRNDR)(R) I R N E V L E I S N V A S L K I G             |       | 148.03  | 601.3049 | 1801.897 | 0.0005  | 1.9   | 4.68   | 72445.7 | 5.07    | HUMAN | P11021  | 78 kDa glucose-regulated protein                                        |                                          |
| 6693 | dirMS_041712_NAR_60mM_minus.8472.8472.3    | 3 | 12    | 1.838E+04 | M372m (K)IGVAIN)(K) G V A I N A N V T E L D R K I T        |       | 107.37  | 493.2448 | 1461.737 | 15.9982 | -7.9  | 4.68   | 46381.4 | 6.34    | HUMAN | EP9047  | Eukaryotic initiation factor 2A-1                                       |                                          |
| 6694 | dirMS_041712_NAR_60mM_plus2.11579.11579.2  | 2 | 12    | 0.125E+05 | M403m (R)IMFGAG)(R) H F V P I P F A I P L T S R I G        |       | 152.47  | 534.7748 | 1025.545 | 15.9988 |       |        |         |         |       |         |                                                                         |                                          |









|      |                                            |   |       |           |         |                                                   |                        |        |          |          |         |       |      |          |             |            |                                                              |                                                        |
|------|--------------------------------------------|---|-------|-----------|---------|---------------------------------------------------|------------------------|--------|----------|----------|---------|-------|------|----------|-------------|------------|--------------------------------------------------------------|--------------------------------------------------------|
| 7190 | dirMS_041712_NAR_20mM_minus.7650.7650.2    | 2 | 11.68 | 0.688E+05 | M239m   | (K)EVEQDE(K)E V/D E/Q/N L/V Q/N(K/N)              | in/Outdated methionine | 125.07 | 731.843  | 1446.689 | 15.9894 | -3.8  | 4.14 | 40069.4  | 4.83 HUMAN  | EFW1R1     | Tubulin beta chain                                           |                                                        |
| 7191 | dirMS_041712_NAR_30mM_minus.9885.9885.2    | 2 | 11.68 | 0.817E+04 |         | (R)LEDDAD(R)E L/D E A A V V R                     |                        | 108.18 | 526.218  | 1051.500 | 0.0109  | 10.3  | 4.03 | 102525.8 | 7.33 HUMAN  | Q9BU9V     | N-alpha-acyltransferase 15, Nara auxiliary subunit           |                                                        |
| 7192 | dirMS_041712_NAR_50mM_minus.1766.1766.3    | 2 | 11.68 | 0.206E+05 |         | (R)DQVCTLRD(R)E L/V P L K P G G V                 | C/Carbamidomethylation | 108.18 | 526.218  | 1051.500 | 0.0109  | 10.3  | 4.03 | 102525.8 | 7.33 HUMAN  | Q9BU9V     | N-alpha-acyltransferase 15, Nara auxiliary subunit           |                                                        |
| 7193 | dirMS_041712_NAR_30mM_minus.12243.12243.3  | 3 | 11.68 | 0.817E+04 |         | (R)FLTFOPM(R) F/Q/P/Q/H/G/A G S L V K             |                        | 191.22 | 495.250  | 1372.737 | -0.0011 | -0.8  | 8.76 | 8.76     | 912.0       | 5.22 HUMAN | C9J0F6                                                       | Ubiquitin-like modifier-activating enzyme 5 (Fragment) |
| 7194 | dirMS_041712_NAR_60mM_minus.9932.9932.3    | 3 | 11.68 | 1.563E+05 | M230m3k | (R)mSmK(R)M sm k m E V/D E/Q/N Q/N(K/N)           | in/Outdated methionine | 119.47 | 652.613  | 1923.897 | 31.9836 | -3.2  | 4.68 | 40069.4  | 4.83 HUMAN  | EFW1R1     | Tubulin beta chain                                           |                                                        |
| 7195 | dirMS_041712_NAR_120mM_plus.5097.5097.3    | 3 | 11.68 | 1.128E+05 |         | (K)MSPFEP(K)M S P/E/D S/D T R L K                 |                        | 79.25  | 456.5294 | 1367.574 | -0.0007 | -0.5  | 4.23 | 102309.5 | 5.34 HUMAN  | ADAV56     | SARF protein                                                 |                                                        |
| 7196 | dirMS_041712_NAR_30mM_plus.12203.12203.2   | 2 | 11.68 | 0.536E+05 |         | (K)GSEFEP(K)K L V E D T R L K                     |                        | 117.57 | 451.7539 | 982.294  | 0.0054  | 0.4   | 4.37 | 53397.1  | 5.74 HUMAN  | Q12348     | Plectin                                                      |                                                        |
| 7197 | dirMS_041712_NAR_30mM_plus.14251.14251.2   | 2 | 11.68 | 0.288E+05 |         | (K)ASSEPA(K)S E G F A F F G R I C                 |                        | 127.68 | 568.2831 | 1135.553 | 0.0058  | 5.1   | 6.05 | 55373.1  | 7.25 HUMAN  | FSH0Y1     | Phenylalanine-tRNA ligase beta subunit                       |                                                        |
| 7198 | dirMS_041712_NAR_30mM_plus.19752.19752.2   | 2 | 11.68 | 0.228E+05 |         | (K)GFVAFV(K)G F/A F/V Q V E N R I R               |                        | 157.53 | 665.3326 | 1329.659 | -0.0007 | -0.5  | 6    | 15791.7  | 9.22 HUMAN  | B4DSU6     | Heterogeneous nuclear ribonucleoproteins C1/C2               |                                                        |
| 7199 | dirMS_041712_NAR_40mM_plus.13289.13289.3   | 3 | 11.68 | 0.292E+05 |         | (K)MPPSG(K)R L/P P S G A V P V T G V P H V V K V  |                        | 144.43 | 627.031  | 1879.008 | -0.0015 | -0.8  | 8.76 | 31450.7  | 5.73 HUMAN  | F5H4D6     | Ras GTPase-activating protein binding protein 1              |                                                        |
| 7200 | dirMS_041712_NAR_60mM_plus.18407.18407.3   | 3 | 11.68 | 0.222E+05 |         | (R)IDJSDA(R)D/V D U D S L L P P R G R             |                        | 164.5  | 480.2828 | 1438.838 | -0.0038 | -2.6  | 5.96 | 44954.5  | 8.44 HUMAN  | AKB323     | 26S protease regulatory subunit 8                            |                                                        |
| 7201 | dirMS_041712_NAR_120mM_minus.11627.11627.4 | 4 | 11.68 | 2.984E+05 |         | (K)ISGVDYD(R)S K V P L D E D P D P R              |                        | 117.92 | 492.4606 | 1820.85  | -0.0006 | -0.3  | 4.58 | 47702.4  | 6.73 HUMAN  | Q91733     | Alpha-enolase                                                |                                                        |
| 7202 | dirMS_041712_NAR_60mM_minus.11397.11397.3  | 3 | 11.67 | 1.892E+05 | M223m   | (R)M5mK(R)M sm k m E V/D E/Q L/V LQ/V N(K/N)      | in/Outdated methionine | 122.82 | 647.3011 | 1923.897 | 15.9915 | -1.8  | 4.68 | 40069.4  | 4.83 HUMAN  | EFW1R1     | Tubulin beta chain                                           |                                                        |
| 7203 | dirMS_041712_NAR_60mM_minus.16930.16930.3  | 3 | 11.67 | 1.301E+05 |         | (R)ILKLPAAV(R)K L P A M V V T A D L R K           |                        | 154.07 | 432.6056 | 1295.805 | -0.0023 | -1.8  | 8.75 | 28071.3  | 8.6 HUMAN   | P38117     | Electron transfer flavoprotein subunit beta                  |                                                        |
| 7204 | dirMS_041712_NAR_120mM_plus.10205.10205.3  | 3 | 11.67 | 1.320E+06 |         | (R)ILRIPWD(R)I/L R P M Q/S S F T R S              |                        | 106.67 | 458.2486 | 1372.733 | -0.0019 | -1.4  | 9.6  | 46648.4  | 9.67 HUMAN  | B4D4X2     | Splicing factor 1                                            |                                                        |
| 7205 | dirMS_041712_NAR_20mM_plus.15255.15255.2   | 2 | 11.67 | 1.174E+05 |         | (R)ILQLAAV(R)E Q L A V A F/A R N G                |                        | 176.1  | 514.9131 | 1441.611 | 0.0061  | 5.3   | 4.53 | 4227.3   | 7.81 HUMAN  | ETK026     | T-complex protein 1 subunit alpha                            |                                                        |
| 7206 | dirMS_041712_NAR_20mM_plus.16416.16416.2   | 2 | 11.67 | 1.400E+05 |         | (R)IQAOEY(R)A Q E Y E L A N V K V                 |                        | 184.52 | 710.3754 | 1415.748 | -0.0043 | -3.9  | 4.53 | 43773.3  | 5.26 HUMAN  | F8V2Y9     | Keratin, type I cytoskeletal 18                              |                                                        |
| 7207 | dirMS_041712_NAR_20mM_plus.16973.16973.2   | 2 | 11.67 | 0.633E+04 |         | (K)VLTPLEV(K)V L G T V E L V A E/L R A            |                        | 188.15 | 652.3664 | 1303.726 | -0.0001 | -0.1  | 4.53 | 14391.8  | 4.99 HUMAN  | G3V4E1     | Creatine kinase B-type (Fragment)                            |                                                        |
| 7208 | dirMS_041712_NAR_30mM_plus.10130.10130.2   | 2 | 11.67 | 0.534E+04 |         | (R)IGLIQDA(R)G L V I G V G N R N                  |                        | 107.95 | 495.7618 | 870.516  | 0.0007  | 0.9   | 9.75 | 18719.9  | 6.91 HUMAN  | F8V0P0     | 6-phosphofruktokinase, muscle type (Fragment)                |                                                        |
| 7209 | dirMS_041712_NAR_30mM_plus.12707.12705.2   | 2 | 11.67 | 0.509E+05 |         | (K)SFLNSA(K)S F I N L S A E L R N                 |                        | 144.05 | 504.7726 | 1008.536 | 0.0019  | 1.9   | 5.72 | 82756.6  | 5.34 HUMAN  | C9JF19     | Acylamino-acid-releasing enzyme                              |                                                        |
| 7210 | dirMS_041712_NAR_50mM_plus.14358.14358.3   | 3 | 11.67 | 1.883E+05 |         | (K)IATLPSF(K)I A T L P S D P K D F G M K          |                        | 143.57 | 457.5906 | 1370.768 | -0.0106 | -7.7  | 8.64 | 118390.9 | 5.49 HUMAN  | P22314     | Ubiquitin-like modifier-activating enzyme 1                  |                                                        |
| 7211 | dirMS_041712_NAR_50mM_plus.17857.17857.3   | 3 | 11.67 | 0.257E+05 |         | (K)YAPLPH(K)Y A P L H L V N L I R L               |                        | 162.08 | 474.2819 | 1420.831 | 0.0001  | 0     | 6.75 | 147553.6 | 6.73 HUMAN  | E7E7V4     | Cytoplasmic FMRI-interacting protein 2                       |                                                        |
| 7212 | dirMS_041712_NAR_50mM_plus.21769.21769.3   | 3 | 11.67 | 1.070E+04 |         | (R)IHLTFM(R)H F M P G F F A P L T S R I G         |                        | 184.08 | 504.9498 | 1620.835 | -0.0001 | -0.4  | 9.75 | 42230.8  | 4.77 HUMAN  | AN6K28     | Putative tubulin beta chain-like protein ENSP00000290377     |                                                        |
| 7213 | dirMS_041712_NAR_50mM_plus.15432.15432.3   | 3 | 11.67 | 1.812E+05 |         | (R)FVNVWF(R)F V M V V P T F G K N G               |                        | 137.72 | 412.5761 | 1235.715 | -0.0009 | -0.7  | 10   | 10904.6  | 11.56 HUMAN | EPH340     | 40S ribosomal protein S30                                    |                                                        |
| 7214 | dirMS_041712_NAR_60mM_plus.15522.15522.3   | 3 | 11.67 | 1.174E+05 |         | (R)ILRQK(R)E L L G L F P T A P D D R L R          |                        | 138.35 | 480.9305 | 1440.778 | -0.0011 | -0.7  | 9.75 | 27043.5  | 6.34 HUMAN  | C9JH95     | ATP-binding cassette sub-family F member 2 (Fragment)        |                                                        |
| 7215 | dirMS_041712_NAR_50mM_minus.7435.7435.3    | 3 | 11.66 | 1.803E+04 |         | (R)IVAYEA(R)I V A V E A N P A D P L K L           |                        | 109.27 | 451.2571 | 1351.758 | -0.0012 | -0.9  | 6.04 | 96306.4  | 6.41 HUMAN  | P13639     | Elongation factor 2                                          |                                                        |
| 7216 | dirMS_041712_NAR_60mM_minus.8078.8078.3    | 3 | 11.66 | 1.122E+05 |         | (K)ITLQTEQ(K)I V L T Q E V S E G Q V T            |                        | 105.03 | 444.9033 | 1332.712 | -0.0173 | -13   | 6.11 | 22724.2  | 6.51 HUMAN  | F5H656     | Zinc finger protein 10 (Fragment)                            |                                                        |
| 7217 | dirMS_041712_NAR_120mM_plus.12374.12411.3  | 3 | 11.66 | 1.400E+06 |         | (R)HJVFGE(R)R V W V E D E L I G V K V             |                        | 118.93 | 486.9124 | 1458.722 | 0.0003  | 0.2   | 4.65 | 31075.7  | 5.65 HUMAN  | P60174     | Tissuephosphatase isomerase                                  |                                                        |
| 7218 | dirMS_041712_NAR_30mM_plus.18904.18904.2   | 2 | 11.66 | 1.877E+05 |         | (R)IYKQV(R)I Y K V L G V L D D R L R              |                        | 152.8  | 521.613  | 1332.621 | -0.0011 | -0.8  | 9.75 | 27191.7  | 6.42 HUMAN  | P38117     | Electron transfer flavoprotein subunit beta                  |                                                        |
| 7219 | dirMS_041712_NAR_30mM_plus.7232.7232.2     | 2 | 11.66 | 1.134E+05 |         | (R)IWAAGA(K)H A A N V A A L Q A K S               |                        | 92.78  | 478.7844 | 956.552  | 0.0092  | 9.6   | 8.8  | 37884.5  | 11.72 HUMAN | K3M8A9     | 60S ribosomal protein L4                                     |                                                        |
| 7220 | dirMS_041712_NAR_50mM_plus.17060.17060.3   | 3 | 11.66 | 1.391E+05 |         | (K)ITLNDM(K)I T L N D M R Q E Y E Q L V A K       |                        | 157.17 | 617.98   | 1851.927 | -0.0015 | -0.8  | 4.68 | 39641.8  | 4.93 HUMAN  | ETK0Q3     | Keratin, type I cytoskeletal 9                               |                                                        |
| 7221 | dirMS_041712_NAR_50mM_minus.8098.8098.3    | 3 | 11.66 | 1.264E+05 | M227m   | (R)MFMKEE(R)M Q V K E I T A V A P S T m K         | in/Outdated methionine | 157.68 | 527.6645 | 1548.812 | 31.9865 | -2.1  | 8.35 | 32616.5  | 5.18 HUMAN  | AN6176     | Actin, alpha skeletal muscle                                 |                                                        |
| 7222 | dirMS_041712_NAR_30mM_minus.18353.18353.3  | 3 | 11.66 | 1.280E+05 |         | (R)ILIGDFP(R)R I G A T S G V L P N G G S          |                        | 107.95 | 495.7618 | 870.516  | 0.0006  | 0.4   | 5.72 | 82756.6  | 5.34 HUMAN  | P22314     | Ubiquitin-like modifier-activating enzyme 1                  |                                                        |
| 7223 | dirMS_041712_NAR_120mM_minus.7063.7063.3   | 3 | 11.65 | 1.181E+05 |         | (R)EJEAFAV(K)E A E N V A A L Q A K S              |                        | 92.83  | 483.8957 | 1259.676 | -0.0038 | -3.9  | 6.24 | 21184.9  | 7.82 HUMAN  | PGS081     | NEEDD8-conjugating enzyme Ubc12                              |                                                        |
| 7224 | dirMS_041712_NAR_40mM_minus.14329.14329.3  | 3 | 11.65 | 1.023E+05 |         | (R)IGTEDI(R)S T E D V T S P M G I P D D L R V     |                        | 168.55 | 506.3366 | 1948.997 | -0.0022 | -1.1  | 4.22 | 35067    | 5.55 HUMAN  | E7E7R0     | RuvB-like 1                                                  |                                                        |
| 7225 | dirMS_041712_NAR_40mM_minus.14358.14358.3  | 3 | 11.65 | 1.187E+05 |         | (R)IGLGLD(R)G L V L P L L P A P A D K L T P K I G |                        | 169.4  | 567.6813 | 1701.031 | -0.0016 | -0.9  | 8.59 | 153084.9 | 5.55 HUMAN  | GPZ229     | Enhancer of mRNA-decapping protein 4                         |                                                        |
| 7226 | dirMS_041712_NAR_60mM_minus.10092.10092.3  | 3 | 11.65 | 0.376E+06 |         | (R)IGSVAH(R)G S A V V P Q S T R E L I C           |                        | 116.52 | 442.5648 | 1325.881 | -0.0001 | -0.7  | 5.4  | 558007.1 | 5.44 HUMAN  | F5H627     | Epiplakin                                                    |                                                        |
| 7227 | dirMS_041712_NAR_50mM_minus.7101.7101.3    | 3 | 11.65 | 1.855E+05 |         | (K)IDKQK(R)Q K E Q V P D D R L R                  |                        | 102.97 | 508.5978 | 1523.781 | -0.0022 | -1.0  | 6.75 | 12711.6  | 6.75 HUMAN  | B4D412     | Ubiquitin                                                    |                                                        |
| 7228 | dirMS_041712_NAR_120mM_plus.10646.10646.3  | 3 | 11.65 | 1.974E+06 |         | (R)IKVYETE(R)K V N Y E T A A M R K                | C/Carbamidomethylation | 108.02 | 413.8849 | 1239.64  | 0       | 0     | 6.11 | 43773.3  | 5.26 HUMAN  | F8V2Y9     | Keratin, type I cytoskeletal 18                              |                                                        |
| 7229 | dirMS_041712_NAR_20mM_plus.13065.13065.2   | 2 | 11.65 | 0.740E+04 |         | (R)ICEYEA(R)R V C E I A V P S I R K               |                        | 162.67 | 629.8346 | 1258.671 | -0.0092 | -7.3  | 4.53 | 21927.8  | 9.55 HUMAN  | HYK446     | 40S ribosomal protein S17 (Fragment)                         |                                                        |
| 7230 | dirMS_041712_NAR_20mM_plus.13829.13842.2   | 2 | 11.65 | 0.282E+05 |         | (R)IUNELM(R)I N E H L S A N K R P                 |                        | 167.63 | 557.8267 | 1144.647 | -0.0005 | -0.5  | 6    | 77997.7  | 9.09 HUMAN  | FSZ272     | Heterogeneous nuclear ribonucleoprotein (Fragment)           |                                                        |
| 7231 | dirMS_041712_NAR_20mM_plus.17502.17502.2   | 2 | 11.65 | 1.135E+06 | M199m   | (R)ILVYVYV(R)I V Y V V E L V V P V V K V          | in/Outdated methionine | 162.67 | 629.8346 | 1258.671 | -0.0092 | -7.3  | 4.53 | 21927.8  | 9.55 HUMAN  | HYK446     | 40S ribosomal protein S17 (Fragment)                         |                                                        |
| 7232 | dirMS_041712_NAR_20mM_plus.11985.11985.2   | 2 | 11.65 | 0.248E+05 |         | (K)ISELEAA(K)S E L E A A L Q A K S                |                        | 136.62 | 565.3103 | 1129.621 | -0.0078 | -6.9  | 4.53 | 56607.4  | 5.37 HUMAN  | F8V424     | Keratin, type II cytoskeletal 8                              |                                                        |
| 7233 | dirMS_041712_NAR_50mM_plus.12060.12060.3   | 3 | 11.65 | 0.379E+05 |         | (K)FVSVLCK(K)F V C V L G V Q C D E A K A          | C/Carbamidomethylation | 131.38 | 631.6129 | 1892.827 | -0.0024 | -1.3  | 4.54 | 25002    | 10.06 HUMAN | P62006     | Ubiquitin-like modifier-activating enzyme 1                  |                                                        |
| 7234 | dirMS_041712_NAR_50mM_plus.16748.16748.3   | 3 | 11.65 | 1.106E+06 |         | (R)FLVNGV(R)F V V G V L P P D I E E M R K         |                        | 155.3  | 634.6249 | 1988.016 | -0.0038 | -1.9  | 4.41 | 23729.5  | 9.89 HUMAN  | C9H217     | Non-POU domain-containing octamer-binding protein (Fragment) |                                                        |
| 7235 | dirMS_041712_NAR_30mM_plus.16909.16726.3   | 3 | 11.65 | 1.135E+06 |         | (K)FLTAAE(K)F L T A E L V L K I N P K S           |                        | 158.05 | 535.9791 | 1659.033 | -0.0088 | -5.3  | 6.14 | 43439.8  | 5.63 HUMAN  | BDWV45     | Regulator of chromosome condensation (Fragment)              |                                                        |
| 7236 | dirMS_041712_NAR_50mM_plus.18570.18570.3   | 3 | 11.65 | 1.279E+04 |         | (K)EFGFGR(K)F F V G E S L V K N N I R L           |                        | 165.57 | 592.886  | 1776.964 | -0.0208 | -11.7 | 6.14 | 62566.6  | 6.59 HUMAN  | EPD033     | Asparagine synthetase                                        |                                                        |
| 7237 | dirMS_041712_NAR_50mM_plus.19327.19327.3   | 3 | 11.65 | 0.944E+04 |         | (K)ITADLE(K)I T A D L E L H V Q V E I R N         |                        | 168.88 | 583.3027 | 1747.901 | -0.0078 | -4.5  | 4.65 | 344221.3 | 6.44 HUMAN  | P15924     | Desmoplakin                                                  |                                                        |
| 7238 | dirMS_041712_NAR_60mM_plus.6699.6699.3     | 3 | 11.65 | 0.887E+05 |         | (K)VLVDQK(K)I V L D V Q G P P H E P K I F         |                        | 93.93  | 435.2257 | 1303.664 | -0.0015 | -1.2  | 5.32 | 142137.1 | 6.13 HUMAN  | E7E6U4     | Double-stranded RNA-specific adenosine deaminase             |                                                        |
| 7239 | dirMS_041712_NAR_30mM_minus.144            |   |       |           |         |                                                   |                        |        |          |          |         |       |      |          |             |            |                                                              |                                                        |





|      |                                            |   |      |   |                |                                                      |        |          |          |         |      |      |          |       |       |        |                                                                     |        |           |
|------|--------------------------------------------|---|------|---|----------------|------------------------------------------------------|--------|----------|----------|---------|------|------|----------|-------|-------|--------|---------------------------------------------------------------------|--------|-----------|
| 7408 | dirMS_041712_NAR_40mM_plus2.19265.19265.3  | 3 | 1154 | 1 | 1.93E+05       | (KITSAAQ)(K)T/SIA QD/VV/L D G L V D K I G D V G K(C) | 180.37 | 619.6811 | 1857.033 | -0.004  | -2.2 | 4.43 | 227002.2 | 8.26  | HUMAN | Q14008 | Cytoskeleton-associated protein 5                                   |        |           |
| 7409 | dirMS_041712_NAR_50mM_plus2.11294.11294.3  | 3 | 1154 | 1 | 3.14E+05       | (RDKIDRL)(R) L/D R I A/G(Q)/V/A/A N K(I)             | 126.77 | 481.2661 | 1441.776 | 0.008   | 5.5  | 5.96 | 16600.2  | 10.31 | HUMAN | P93019 | 40S ribosomal protein S19                                           |        |           |
| 7410 | dirMS_041712_NAR_50mM_plus2.14957.11154.3  | 3 | 1154 | 1 | 1.12E+06       | (KNDVAVL)(K) V/Q/VV/L V/V/V/S/A S(K)                 | 126.77 | 481.2661 | 1441.776 | 0.008   | 5.5  | 5.96 | 16600.2  | 10.31 | HUMAN | P93019 | 40S ribosomal protein S19                                           |        |           |
| 7411 | dirMS_041712_NAR_50mM_plus2.16189.16189.3  | 3 | 1154 | 1 | 1.12E+06       | (RDKIDRL)(K) T/D X T L V/L/V/M/G A N K(I)            | 141.08 | 406.308  | 1218.713 | -0.002  | -2.6 | 8.26 | 11504.1  | 9.57  | HUMAN | K7E44A | Profilin 1, isoform C1A                                             |        |           |
| 7412 | dirMS_041712_NAR_50mM_plus2.16189.16189.3  | 3 | 1154 | 1 | 6.15E+05       | (R)KGGTDE(R)K Q/Q V/D E(I)E/I/T/S L A(K/S)           | 100.07 | 479.2461 | 1435.728 | -0.007  | -2.6 | 4.68 | 12611.4  | 8.8   | HUMAN | ESR57  | Transcription elongation factor A protein 1                         |        |           |
| 7413 | dirMS_041712_NAR_120mM_minus.8831.8894.3   | 3 | 1153 | 0 | 0.727E+05      | (R)RPFLEDR(R) P/V(L)E(I)D/S/T/L/V(R)                 | 102.42 | 405.8796 | 1215.633 | -0.005  | -7   | 4.68 | 81007.1  | 6.31  | HUMAN | EP9M1V | Plectin (Fragment)                                                  |        |           |
| 7414 | dirMS_041712_NAR_30mM_plus2.1474.1474.2    | 3 | 1153 | 0 | 7.53E+04       | (R)RFGDGR(R)P/F/E/V/V/S/V/S/A S(K)                   | 116.57 | 589.8883 | 1188.61  | 0.015   | 1.9  | 8.26 | 44235.8  | 6.62  | HUMAN | ESK029 | Transducin-like enhancer protein 4                                  |        |           |
| 7415 | dirMS_041712_NAR_40mM_minus2.11297.1297.3  | 3 | 1153 | 0 | 2.18E+05       | (R)IGAPSSP(R)E A/P/P/S S N I E D/F H G L P/L(P/M)    | 155.63 | 593.6401 | 1778.907 | -0.014  | -0.8 | 5.32 | 100478.9 | 5.71  | HUMAN | ABMXP9 | Matri-3                                                             |        |           |
| 7416 | dirMS_041712_NAR_50mM_minus2.13219.13219.3 | 3 | 1153 | 0 | 2.73E+04       | (K)JVSSVY(K)K/V I/S V D K/V/N/V E S V A(R)           | 123.51 | 60.6413  | 1709.907 | 0.0025  | 1.5  | 6.04 | 29938.9  | 6.07  | HUMAN | HDYCO  | 26S protease regulatory subunit 10B (Fragment)                      |        |           |
| 7417 | dirMS_041712_NAR_50mM_minus2.5188.5188.3   | 3 | 1153 | 1 | 8.82E+04       | (R)IMQNDT(R)M/Q/V/D N/T A E/F/T T E K E E(K)         | 86.63  | 632.9425 | 1896.813 | 0.0002  | 0.1  | 4.14 | 54214.9  | 5.66  | HUMAN | CN813  | Caldesmon (Fragment)                                                |        |           |
| 7418 | dirMS_041712_NAR_60mM_plus.5373.9380.3     | 3 | 1153 | 1 | 1.88E+05       | (R)KIDLEDR(K)K T/D L S(L)Q I/T T P P K(E)            | 112.08 | 507.6079 | 1520.817 | -0.0075 | -4.9 | 6.07 | 26616.1  | 5.68  | HUMAN | EP9PU0 | Epipkain                                                            |        |           |
| 7419 | dirMS_041712_NAR_20mM_plus.11418.11418.2   | 2 | 1153 | 0 | 2.12E+05       | (R)IVLVDR(R)E/V I/L/V/D V/V/V/V/V(V)                 | 151.12 | 607.4117 | 1731.621 | -0.009  | -1.4 | 4.17 | 23956    | 5.99  | 2525  | 5.99   | HUMAN                                                               | EP9E25 | Cofilin-1 |
| 7420 | dirMS_041712_NAR_20mM_plus.17104.17104.2   | 2 | 1153 | 0 | 5.46E+05       | (R)IVLITDR(R)N/V/L/T/D L L A/V(V)                    | 190.23 | 557.8442 | 1114.683 | -0.0019 | -1.7 | 5.81 | 41517.9  | 5.45  | HUMAN | ETFGQ2 | Eukaryotic initiation factor 4A-II                                  |        |           |
| 7421 | dirMS_041712_NAR_30mM_plus2.13252.13314.2  | 2 | 1153 | 0 | 8.79E+05       | (K)NSGVLV(K)N(S)G I/L/V/M V/V(V)                     | 123    | 473.7749 | 946.539  | 0.0035  | 3.7  | 8.75 | 9148.5   | 9.4   | HUMAN | CN3E57 | COX assembly mitochondrial protein homology                         |        |           |
| 7422 | dirMS_041712_NAR_30mM_plus2.18594.18588.2  | 2 | 1153 | 0 | 1.99E+05       | (K)ELLFYLR(K) L/R/P/L/R(R)                           | 100.83 | 485.2559 | 969.504  | 0.0005  | 0.5  | 4.53 | 24490    | 10.56 | HUMAN | PE2241 | 40S ribosomal protein S8                                            |        |           |
| 7423 | dirMS_041712_NAR_30mM_plus2.22024.22024.2  | 2 | 1153 | 0 | 1.71E+05       | (R)IVQVTL(R)K/W/Q/V/I/T L V(R)                       | 170.9  | 482.2603 | 963.541  | -0.0093 | -9.7 | 9.75 | 132493.1 | 6.53  | HUMAN | BD4E1R | Luciferase-IRNA ligase, cytoplasmic                                 |        |           |
| 7424 | dirMS_041712_NAR_30mM_plus2.9017.9017.2    | 2 | 1153 | 0 | 2.40E+05       | (R)ISGGAGR(R)S G/Q/G A/F/M C/R(C)G                   | 150.07 | 592.7504 | 1184.494 | 0       | 0    | 9.47 | 18988.7  | 11.2  | HUMAN | H3BTP7 | 40S ribosomal protein L4 (Fragment)                                 |        |           |
| 7425 | dirMS_041712_NAR_50mM_plus2.11517.11517.3  | 3 | 1153 | 1 | 2.80E+06 M27m  | (R)ITMTE(R)R/T/E m N/E F V/L/V/L(K)                  | 127.98 | 499.5943 | 1480.772 | 15.9968 | 1.2  | 4.78 | 13588.1  | 4.66  | HUMAN | FBVPE7 | Keratin, type II cytoskeletal 8 (Fragment)                          |        |           |
| 7426 | dirMS_041712_NAR_50mM_plus2.11052.11052.3  | 3 | 1153 | 1 | 9.67E+05       | (R)KTELEDR(R)K T E E E E S/P/R(R)                    | 115.75 | 541.5897 | 1622.754 | 0.0001  | 0.1  | 4.2  | 108270.9 | 10.17 | HUMAN | Q9Y2W1 | Thyroid hormone receptor-associated protein 3                       |        |           |
| 7427 | dirMS_041712_NAR_60mM_plus.14809.14828.3   | 3 | 1153 | 1 | 9.63E+04       | (R)KFLQDR(K)R/F L D V(G)/V/S/E(R)G                   | 133.93 | 433.5671 | 1298.699 | -0.0123 | -9.5 | 6.07 | 20931.1  | 10.28 | HUMAN | Q6R4NA | 60S ribosomal protein L9 (Fragment)                                 |        |           |
| 7428 | dirMS_041712_NAR_60mM_plus.16670.16670.2   | 2 | 1153 | 0 | 8.01E+05       | (R)IEHALLA(R)E H I A/L/L/V/L/V G V(K)                | 143.88 | 657.8735 | 1314.742 | -0.0019 | -1.4 | 6.85 | 50482.3  | 9.31  | HUMAN | PS8304 | Elongation factor 1-alpha 1                                         |        |           |
| 7429 | dirMS_041712_NAR_50mM_minus2.5862.5862.3   | 3 | 1152 | 0 | 4.33E+04       | (R)JAEAAAR(R)A I/E/A A/P Q E P E K(Q/S)              | 95.43  | 489.5922 | 1466.76  | 0.0023  | 1.5  | 4.79 | 15660.9  | 10.38 | HUMAN | IL31V9 | FLVWCH family member 2                                              |        |           |
| 7430 | dirMS_041712_NAR_60mM_minus.12010.12010.3  | 3 | 1152 | 1 | 2.51E+05       | (R)IGLAGE(R) Q/L/A/G/D D/V/A E V R(K)S               | 127.02 | 428.9126 | 1284.727 | -0.0038 | -2.9 | 6.07 | 97378.8  | 6.4   | HUMAN | PL1216 | Glycogen phosphorylase, brain form                                  |        |           |
| 7431 | dirMS_041712_NAR_20mM_plus.10689.10829.2   | 2 | 1152 | 0 | 1.66E+05       | (R)IDAEADR(R) Q/L/A/G/E L/V(G)                       | 146.82 | 500.7887 | 1000.567 | -0.0112 | -1.2 | 4.53 | 37296.3  | 5.33  | HUMAN | FRV0U4 | Keratin, type II cytoskeletal 8                                     |        |           |
| 7432 | dirMS_041712_NAR_20mM_plus.14585.14585.2   | 2 | 1152 | 0 | 1.40E+05       | (R)IFDTLLA(R)Q V T T L A/I T S(R)                    | 171.95 | 635.3413 | 1237.679 | 0.002   | 2.7  | 5.84 | 11439.8  | 6.38  | HUMAN | G3XAN8 | Heterotrimeric-associated inner membrane translocase subunit Timb B |        |           |
| 7433 | dirMS_041712_NAR_30mM_plus2.12025.12066.2  | 2 | 1152 | 0 | 3.80E+05       | (R)IDMLDNR(R)I D/L/V/D/N/R(R)                        | 116.67 | 479.7542 | 958.495  | 0.0059  | 6.1  | 4.21 | 141718.6 | 7.8   | HUMAN | BOV043 | Valine-19RNA ligase                                                 |        |           |
| 7434 | dirMS_041712_NAR_30mM_plus2.13237.13237.2  | 2 | 1152 | 0 | 2.83E+05       | (R)ITNEGVR(R)T N/E I G V/E I F(R)                    | 122.2  | 532.7727 | 1064.537 | 0.001   | 1    | 4.53 | 39700.2  | 11.49 | HUMAN | Q13247 | Serine/arginine-rich splicing factor 6                              |        |           |
| 7435 | dirMS_041712_NAR_30mM_plus2.18508.18508.2  | 2 | 1152 | 0 | 1.65E+05       | (K)QFLSQD(K)R/L I/L/S G I/F/E/M S R(K)               | 160.77 | 90.8358  | 1400.663 | 0.0012  | 1.2  | 6    | 52440.1  | 6     | HUMAN | FBWJN3 | Cleavage and polyadenylation-specificity factor subunit 6           |        |           |
| 7436 | dirMS_041712_NAR_30mM_plus2.15935.15935.3  | 3 | 1152 | 0 | 1.40E+05       | (R)KIDVDR(R)K T/D L S(L)Q I/T T P P K(E)             | 112.08 | 507.6079 | 1520.817 | -0.0075 | -4.9 | 6.07 | 26616.1  | 5.68  | HUMAN | EP9PU0 | Epipkain                                                            |        |           |
| 7437 | dirMS_041712_NAR_40mM_plus2.16128.16148.3  | 3 | 1152 | 0 | 4.11E+04       | (K)NSGVLV(K)N(S)G I/L/V/M V/V(V)                     | 123    | 473.7749 | 946.539  | 0.0035  | 3.7  | 8.75 | 9148.5   | 9.4   | HUMAN | CN3E57 | COX assembly mitochondrial protein homology                         |        |           |
| 7438 | dirMS_041712_NAR_40mM_plus2.16695.17004.2  | 2 | 1152 | 0 | 2.73E+05       | (K)JFLPFLDR(K)L I/P/L/R(V)                           | 126.55 | 454.255  | 907.504  | -0.0009 | -1   | 5.84 | 10803.5  | 9.82  | HUMAN | BZ2L18 | 10 kDa heat shock protein, mitochondrial                            |        |           |
| 7439 | dirMS_041712_NAR_40mM_plus2.9987.9988.2    | 2 | 1152 | 0 | 2.48E+05       | (K)IQEFAW(K)Q I/E/A/W/R(R)                           | 122.88 | 418.706  | 836.405  | -0.002  | -0.3 | 6.1  | 19924.8  | 9.99  | HUMAN | FBU211 | 40S ribosomal protein S10                                           |        |           |
| 7440 | dirMS_041712_NAR_50mM_plus2.12181.12181.3  | 3 | 1152 | 0 | 2.42E+05       | (R)IAEDVDR(R)G T S N I/T/L E I Q(K)                  | 124.02 | 508.9621 | 1515.578 | -0.0013 | -1.5 | 8.82 | 20207.5  | 10.45 | HUMAN | ESK029 | Serine/threonine-protein kinase PAK 3 (Fragment)                    |        |           |
| 7441 | dirMS_041712_NAR_50mM_plus2.11230.11230.3  | 3 | 1152 | 1 | 4.13E+05       | (R)IMJFKDR(R)M/V/R D V I/S S P P K(E)                | 102.75 | 508.9188 | 1524.74  | 0.0016  | 1    | 5.71 | 20685.4  | 9.18  | HUMAN | BOQW7  | SUMO-conjugating enzyme UBQ3                                        |        |           |
| 7442 | dirMS_041712_NAR_50mM_plus2.7731.7951.3    | 3 | 1152 | 1 | 2.10E+05       | (R)JGQGVNR(R)G D/Q/V/N/E/T/S Q/H H O D L E(I)        | 106.82 | 612.9457 | 1836.8   | 0.0231  | 12.6 | 4.28 | 53708.8  | 5.06  | HUMAN | POB670 | Vimentin                                                            |        |           |
| 7443 | dirMS_041712_NAR_60mM_plus.15010.15010.3   | 3 | 1152 | 0 | 7.90E+05       | (R)ISCTVNR(R)S C/T/V/N/V/M/F G T P E R(H)            | 135.17 | 592.9433 | 1776.816 | 0.0003  | 0.1  | 6.47 | 65763.5  | 9.81  | HUMAN | Q9HCD5 | Nuclear receptor coactivator 5                                      |        |           |
| 7444 | dirMS_041712_NAR_60mM_plus.17576.17576.3   | 3 | 1152 | 0 | 4.55E+05       | (R)IDAFNPR(R)D A/S/T/P/G/V/V/V(V)                    | 149.22 | 417.8778 | 1251.616 | -0.0022 | -2.5 | 6.74 | 27604.9  | 6.01  | HUMAN | PA9327 | Fatty acid synthase                                                 |        |           |
| 7445 | dirMS_041712_NAR_120mM_minus.10595.10595.2 | 2 | 1151 | 0 | 3.38E+05       | (R)KIVKLR(K)K/V I/E/T/L/A/M R(K)                     | 113.43 | 620.3252 | 1239.64  | -0.0001 | -0.9 | 6.11 | 43773.3  | 5.26  | HUMAN | FRV2P9 | Keratin, type I cytoskeletal 18                                     |        |           |
| 7446 | dirMS_041712_NAR_20mM_minus.9736.9736.2    | 2 | 1151 | 0 | 2.50E+05 M33m  | (K)IVAGmD(K)K/V/A/G/N/D/V L E T T E V R(N)           | 147.53 | 732.355  | 1447.71  | 15.993  | -1.3 | 4    | 10949.3  | 5.28  | HUMAN | BD4JF2 | 14-3-3 protein epsilon                                              |        |           |
| 7447 | dirMS_041712_NAR_30mM_minus2.13595.13595.2 | 2 | 1151 | 0 | 1.14E+06       | (K)VMVFG(K)K(V)M/V I/G F C S V(K)                    | 127.72 | 545.7611 | 1090.506 | 0.0089  | 8.2  | 8.56 | 76295.9  | 4.46  | HUMAN | ABMV58 | Drebrin                                                             |        |           |
| 7448 | dirMS_041712_NAR_30mM_minus2.14477.14477.2 | 2 | 1151 | 0 | 2.19E+05       | (K)QVSVDR(K)K V/S V/F Q/L M R(K)                     | 132.58 | 519.2752 | 1037.545 | -0.0017 | -1.6 | 8.75 | 26616.1  | 5.68  | HUMAN | EP9PU0 | Epipkain                                                            |        |           |
| 7449 | dirMS_041712_NAR_50mM_minus2.12181.12181.3 | 3 | 1151 | 0 | 1.95E+05       | (R)IFADNPR(R)D A/S/T/P/G/V/V/V(V)                    | 149.22 | 417.8778 | 1251.616 | -0.0022 | -2.5 | 6.74 | 27604.9  | 6.01  | HUMAN | PA9327 | Fatty acid synthase                                                 |        |           |
| 7450 | dirMS_041712_NAR_50mM_minus2.17661.17661.3 | 3 | 1151 | 0 | 2.03E+05       | (R)IDAEADR(R)Q L/A/G/E L/V(G)                        | 146.82 | 500.7887 | 1000.567 | -0.0112 | -1.2 | 4.53 | 37296.3  | 5.33  | HUMAN | FRV0U4 | Keratin, type II cytoskeletal 8                                     |        |           |
| 7451 | dirMS_041712_NAR_60mM_minus.16599.16599.3  | 3 | 1151 | 1 | 8.10E+04       | (R)RJDGDT(R)R D R D G T G Q/L/L/V S L D A(R)         | 152.85 | 576.307  | 1726.908 | -0.0018 | -1   | 4.43 | 53377.8  | 5.59  | HUMAN | ES1149 | Plectin                                                             |        |           |
| 7452 | dirMS_041712_NAR_60mM_minus.6561.6561.3    | 3 | 1151 | 1 | 9.13E+04       | (-I)MDSST(-)M/D/S E/T/D/M/V R I R(A)                 | 95.25  | 494.235  | 1480.688 | 0.0022  | 1.5  | 4.56 | 28693    | 5.27  | HUMAN | EP9136 | Vacuolar protein sorting-associated protein 51 homology (Fragment)  |        |           |
| 7453 | dirMS_041712_NAR_120mM_plus.20412.20412.3  | 3 | 1151 | 0 | 2.36E+07       | (R)KAAEDVDR(R)A V/D W R D K V E F V G N I I K(K)     | 159.37 | 491.0027 | 1690.992 | -0.0026 | -1.3 | 5.38 | 49321    | 9.76  | HUMAN | K7E176 | beta-Tubulin-binding protein-associated factor 2N                   |        |           |
| 7454 | dirMS_041712_NAR_20mM_plus.10487.10487.2   | 2 | 1151 | 0 | 1.10E+05 M267m | (R)IUTLEDR(L)E I/T/L/E E m T K(Y)                    | 145.17 | 611.8175 | 1206.629 | 15.9991 | 3.4  | 4.25 | 51524.1  | 4.82  | HUMAN | FSH02  | Protein disulfide-isomerase                                         |        |           |
| 7455 | dirMS_041712_NAR_20mM_plus.10990.10990.2   | 2 | 1151 | 0 | 2.60E+04       | (R)RIVLQDR(R)I/V I/L Q/V/D N A(R)                    | 148.23 | 521.3056 | 1041.605 | -0.0012 | -1.1 | 5.84 | 20842.9  | 5.32  | HUMAN | CN1M50 | Keratin, type I cytoskeletal 18                                     |        |           |
| 7456 | dirMS_041712_NAR_20mM_plus.17689.17689.2   | 2 | 1151 | 0 | 7.13E+04       | (R)IYVALLA(R)I V/L/D A L/L E Q(L)                    | 193.83 | 514.8011 | 1028.599 | -0.0037 | -3.6 | 4.37 | 332906.7 | 4.86  | HUMAN | EP9C08 | MAPP1 light chain LC2                                               |        |           |
| 7457 | dirMS_041712_NAR_30mM_plus.9421.9421.2     | 2 | 1151 | 0 | 1.88E+05       | (K)SYFNDK(K)S V/T/N/E/D/V/T Q/E L L G G A(K)T        | 136    | 838.9014 | 1676.797 | -0.0018 | -1.1 | 4    | 61363    | 8.73  | HUMAN | CN3093 | Propionyl-CoA carboxylase beta chain, mitochondrial                 |        |           |
| 7458 | dirMS_041712_NAR_30mM_plus2.12550.12550.2  | 2 | 1151 | 0 | 2.27E+05       | (R)ISMSQDR(K)K I/S/V/S S(K)                          | 118.65 | 463.3213 | 925.455  | 0.0027  | 2.9  | 9.47 |          |       |       |        |                                                                     |        |           |



|      |                                            |   |       |   |           |                                                        |        |          |          |         |       |      |          |       |       |        |                                                               |
|------|--------------------------------------------|---|-------|---|-----------|--------------------------------------------------------|--------|----------|----------|---------|-------|------|----------|-------|-------|--------|---------------------------------------------------------------|
| 7626 | dirMS_041121_NAR_60mM_plus.9271.9271.3     | 3 | 11.42 | 1 | 1.31E+06  | (R)FNEVA(R)F/N/E/V/A/Q V/Q S/D A/R(Q/R)                | 106.1  | 543.2616 | 1627.771 | -0.0008 | -0.5  | 4.68 | 14236.2  | 10.25 | HUMAN | FSH195 | Peptidyl-prolyl cis-trans isomerase NIMA-interacting 4        |
| 7627 | dirMS_041121_NAR_60mM_plus.9935.9937.3     | 3 | 11.42 | 1 | 1.14E+06  | (K)Y5WFK(K)V/S/V/P/N/D/A/L T/Q V(R)M                   | 109.73 | 446.5710 | 1337.706 | -0.0057 | -4.3  | 6.04 | 58229.7  | 4.46  | HUMAN | FRW719 | Ran GTPase-activating protein 1                               |
| 7628 | dirMS_041121_NAR_20mM_minus.7255.7255.2    | 2 | 11.41 | 0 | 1.32E+05  | (R)IUGAS(R)F/T/R/G/S/A/M/N/E/L T(R)                    | 121.1  | 500.787  | 1551.979 | -0.0071 | -0.7  | 9.7  | 50943.9  | 6.04  | HUMAN | DRBIN1 | Drebrin                                                       |
| 7629 | dirMS_041121_NAR_30mM_minus.12236.12236.2  | 2 | 11.41 | 0 | 1.26E+05  | (R)ITSGM(R)E/T/S/G/M/S/D/C V(R)R                       | 115.52 | 651.795  | 1302.582 | 0.0001  | -0.8  | 5.66 | 2754.5   | 7.81  | HUMAN | BZT274 | T-complex protein 1 subunit beta                              |
| 7630 | dirMS_041121_NAR_30mM_minus.15683.15683.2  | 2 | 11.41 | 0 | 2.70E+04  | (R)JASLS(R)S/A/S/L/S/O/Q/M/E(K)R                       | 138.55 | 630.3185 | 1263.64  | 15.9895 | -4.2  | 6.05 | 26616.1  | 5.68  | HUMAN | EPSPU0 | Epilakin                                                      |
| 7631 | dirMS_041121_NAR_40mM_minus.14995.14995.3  | 3 | 11.41 | 1 | 7.94E+04  | (R)IVYFAL(R)V/L/E/L/A/LUP/L/K/G/E/E/R(V)               | 173.35 | 527.317  | 1579.942 | -0.0053 | -3.4  | 4.79 | 276046.1 | 6.01  | HUMAN | P49327 | Fatty acid synthase                                           |
| 7632 | dirMS_041121_NAR_50mM_minus.11854.1854.3   | 3 | 11.41 | 1 | 1.47E+05  | (R)IUGAS(R)F/T/R/G/S/A/M/N/E/L T(R)                    | 121.1  | 500.787  | 1551.979 | -0.0071 | -0.7  | 9.7  | 50943.9  | 6.04  | HUMAN | DRBIN1 | Drebrin 2 of zinc finger CCHC domain-containing protein 18    |
| 7633 | dirMS_041121_NAR_60mM_minus.14352.14352.3  | 3 | 11.41 | 1 | 2.27E+05  | (R)IQVVEE(R)R/Q/L/V/E/E/L/D/R/A/Q/R(L)                 | 139.35 | 576.6347 | 1727.893 | -0.0027 | -1.6  | 4.25 | 31923.6  | 4.85  | HUMAN | BZ7596 | Tropomyosin alpha-1 chain                                     |
| 7634 | dirMS_041121_NAR_60mM_minus.18971.18971.3  | 3 | 11.41 | 1 | 2.48E+05  | (R)ISQVAE(R)R/SI/V/A/E/L/D/R/E M S(R)S                 | 168.02 | 507.5858 | 1520.373 | 0.0055  | 3.6   | 4.32 | 34709.6  | 4.85  | HUMAN | O14579 | Cotactin subunit epsilon                                      |
| 7635 | dirMS_041121_NAR_120mM_plus.6260.6260.3    | 3 | 11.41 | 1 | 5.04E+05  | (R)IARSDG(R)R/A R S D E G L I S P I A T T(R)R          | 86.7   | 463.2395 | 1387.692 | 0.0115  | 8.3   | 6.12 | 81007.1  | 6.31  | HUMAN | EPNV11 | Plectin (Fragment)                                            |
| 7636 | dirMS_041121_NAR_20mM_plus.18132.18132.2   | 2 | 11.41 | 0 | 1.31E+05  | (K)YVYTG(K)V/V/T/G/M/A L L T G P(K)K                   | 196.32 | 740.3997 | 1463.793 | 15.9995 | 3.1   | 8.56 | 28454.5  | 6.31  | HUMAN | BD0477 | Synaptic vesicle membrane protein VAT-1 homolog               |
| 7637 | dirMS_041121_NAR_20mM_plus.18762.18762.3   | 3 | 11.41 | 0 | 1.31E+05  | (K)YVYDGG(K)V Y D D G L I S V I Q(K)Q                  | 209.6  | 488.2704 | 1462.814 | -0.0024 | -0.4  | 4.21 | 3090.9   | 6.31  | HUMAN | PKYR1  | Pyruvate kinase                                               |
| 7638 | dirMS_041121_NAR_20mM_plus.7919.7919.2     | 2 | 11.41 | 0 | 9.11E+04  | (K)QATVAE(K)K/T/A(V)I/N/P/D G V(Q)K(D)                 | 124.52 | 590.7861 | 1164.572 | 15.9932 | -1.5  | 5.88 | 23338.2  | 8.65  | HUMAN | QK0830 | Peroxiredoxin-1                                               |
| 7639 | dirMS_041121_NAR_20mM_plus.8648.8648.2     | 2 | 11.41 | 0 | 2.99E+05  | (K)IDVWQ(K)K/D V I N/Q/V E F(R)R(A)                    | 129.47 | 567.7865 | 1134.554 | 0.0119  | 10.5  | 4.37 | 16060.2  | 10.31 | HUMAN | P39019 | 40S ribosomal protein S19                                     |
| 7640 | dirMS_041121_NAR_30mM_plus.10625.10734.2   | 2 | 11.41 | 0 | 8.67E+05  | (K)IGALEG(K)G/A/L/V/L/V/L/V(L)G(R)K                    | 109.57 | 439.7397 | 874.743  | -0.0009 | -1    | 6    | 20203.8  | 9.79  | HUMAN | BD4016 | Asparagine-tRNA ligase, cytoplasmic                           |
| 7641 | dirMS_041121_NAR_30mM_plus.12032.12035.2   | 2 | 11.41 | 0 | 6.57E+05  | (K)GGTVA(K)K/G I G T/V/L/S/G/P(R)K                     | 116.2  | 578.9224 | 1156.583 | -0.0015 | -1.3  | 9.75 | 14643    | 11.93 | HUMAN | FVU146 | 60S ribosomal protein L18 (Fragment)                          |
| 7642 | dirMS_041121_NAR_30mM_plus.21538.21538.2   | 2 | 11.41 | 0 | 1.58E+05  | (R)VFVGN(R)R/V/R/V/L/G/N/L N L V V(K)K                 | 167.38 | 658.8983 | 1316.794 | -0.0043 | -3.3  | 8.72 | 15791.7  | 9.22  | HUMAN | BD4556 | Heterogeneous nuclear ribonucleoproteins C1/C2                |
| 7643 | dirMS_041121_NAR_30mM_plus.7721.7721.2     | 2 | 11.41 | 0 | 3.29E+05  | (K)NIGVDN(K)N I G/V/D/N A A P(K)K                      | 94.6   | 499.7668 | 998.527  | -0.0002 | -0.2  | 5.84 | 57204.9  | 6.01  | HUMAN | FSQWV6 | T-complex protein 1 subunit beta                              |
| 7644 | dirMS_041121_NAR_30mM_plus.12793.12813.2   | 2 | 11.41 | 0 | 1.31E+05  | (K)YIMACC(K)M/A I C C/L/V/L/R(K)                       | 141.83 | 625.28   | 1249.553 | 0.0001  | 0.1   | 8.59 | 50706.6  | 5.68  | HUMAN | AGN142 | Tubulin alpha chain-like 3                                    |
| 7645 | dirMS_041121_NAR_40mM_plus.19769.19769.3   | 3 | 11.41 | 0 | 3.68E+05  | (R)DLUDY(R)R/L I J D V L P V H Y E T(K)R               | 185.23 | 598.9774 | 1770.927 | -0.0096 | -5.4  | 4.54 | 138084.9 | 5.52  | HUMAN | Q861P5 | Cullin-associated NCOG80-associated protein 18                |
| 7646 | dirMS_041121_NAR_50mM_plus.10667.10667.3   | 3 | 11.41 | 1 | 9.71E+04  | (R)IGLETSI(K)K/L/S/T/L L A D D G E I V C(K)G           | 123.6  | 633.9707 | 1899.9   | -0.0029 | -1.5  | 6.32 | 16685.6  | 9.7   | HUMAN | EPNND2 | Cysteine and glycine-rich protein 1 (Fragment)                |
| 7647 | dirMS_041121_NAR_60mM_plus.15720.15720.3   | 3 | 11.41 | 0 | 4.13E+04  | (R)YVWVY(R)R/V W/Y/N/V/D/G H I A K(T)                  | 138.42 | 534.9464 | 1602.828 | -0.0028 | -1.8  | 6.71 | 63374.2  | 8.64  | HUMAN | PG6744 | Glucose-6-phosphatase                                         |
| 7648 | dirMS_041121_NAR_60mM_plus.17742.17782.3   | 3 | 11.41 | 0 | 3.72E+05  | (R)SLESHS(R)R/S L/E S/L/H/S F/V/A A T(K)R              | 149.9  | 487.9563 | 1460.774 | 0       | 0     | 6.47 | 81007.1  | 6.31  | HUMAN | EPNV11 | Plectin (Fragment)                                            |
| 7649 | dirMS_041121_NAR_20mM_minus.11546.11546.2  | 2 | 11.4  | 0 | 1.40E+05  | (R)ITLWDT(R)R/T/L/V/D I T/G/T G(N)K(R)                 | 163.17 | 684.3669 | 1340.735 | 15.9992 | -2.1  | 5.5  | 20151.2  | 4.48  | HUMAN | GV3218 | Heat shock protein HSP 90-alpha (Fragment)                    |
| 7650 | dirMS_041121_NAR_30mM_minus.10486.10486.2  | 2 | 11.41 | 0 | 1.47E+06  | (R)IGLTSV(R)R/S L/T/S V/L/V/L/V(L)K(R)                 | 111.3  | 480.2704 | 959.552  | 0.0001  | -0.5  | 8.75 | 36293.1  | 5.71  | HUMAN | EPN104 | Lactate dehydrogenase B chain                                 |
| 7651 | dirMS_041121_NAR_30mM_minus.16426.16426.2  | 2 | 11.4  | 0 | 5.06E+05  | (K)SLAVN(K)K/A/L/V/N/M/V P/P P(R)R                     | 142.53 | 580.3178 | 1143.634 | 15.994  | -0.8  | 9.75 | 42230.8  | 4.77  | HUMAN | AGN2K8 | Purative tubulin beta chain-like protein ENSPO0000290377      |
| 7652 | dirMS_041121_NAR_30mM_minus.19565.19568.2  | 2 | 11.4  | 0 | 4.72E+05  | (R)IASLVS(R)S/A/S/L/S/O/Q/M/E(K)G                      | 162.75 | 632.3234 | 1263.64  | -0.0007 | -0.5  | 6.05 | 26616.1  | 5.68  | HUMAN | EPSPU0 | Epilakin                                                      |
| 7653 | dirMS_041121_NAR_30mM_minus.13963.13963.3  | 3 | 11.4  | 0 | 5.46E+05  | (K)GSDSH(K)G S H S S L I E I P E L V E L V L R(S)      | 159.35 | 622.978  | 1866.919 | 0.0001  | 0.1   | 4.4  | 16266.3  | 5.59  | HUMAN | Q5TR80 | N-acetylneuraminic acid synthase (Fragment)                   |
| 7654 | dirMS_041121_NAR_30mM_minus.1724.1724.2    | 2 | 11.4  | 0 | 1.10E+05  | (R)IUGAS(R)F/T/R/G/S/A/M/N/E/L T(R)                    | 121.1  | 500.787  | 1551.979 | -0.0071 | -0.7  | 9.7  | 50943.9  | 6.04  | HUMAN | DRBIN1 | Drebrin                                                       |
| 7655 | dirMS_041121_NAR_30mM_plus.12151.12151.2   | 2 | 11.4  | 0 | 1.44E+06  | (K)IGVHAG(K)K/I/V/A/V/D G C/G(K)K                      | 117.63 | 569.7798 | 1138.556 | -0.0038 | -3.3  | 5.83 | 56266.3  | 1.16  | HUMAN | PG0390 | Glutathione reductase, mitochondrial                          |
| 7656 | dirMS_041121_NAR_30mM_plus.12247.12335.2   | 2 | 11.4  | 0 | 6.53E+05  | (R)JHATGS(R)R/I/T/A/G/S F/L/K(R)                       | 117.15 | 418.7442 | 836.488  | -0.0065 | -7.8  | 8.75 | 37681.5  | 5.93  | HUMAN | DFR662 | Phosphoribosylaminimidazole carboxylase                       |
| 7657 | dirMS_041121_NAR_30mM_plus.5617.5617.2     | 2 | 11.4  | 0 | 2.73E+05  | (R)IDYDm(R)R/D I D D M/P R(R)R                         | 84.23  | 507.6956 | 998.388  | 15.9955 | 0.6   | 3.93 | 51260.6  | 5.39  | HUMAN | PE1978 | Phenylalanyl-tRNA ribonucleoprotein L                         |
| 7658 | dirMS_041121_NAR_30mM_plus.15933.15933.3   | 3 | 11.4  | 0 | 1.61E+06  | (R)IGALEG(K)G/A/L/V/L/V/L/V(L)G(R)K                    | 109.57 | 439.7397 | 874.743  | -0.0009 | -1.1  | 8.75 | 14643    | 5.78  | HUMAN | AGN142 | Tubulin alpha chain (Fragment)                                |
| 7659 | dirMS_041121_NAR_50mM_plus.12637.12637.3   | 3 | 11.4  | 1 | 8.84E+05  | (R)IHSNNS(R)E/L/S/M S/D/L/D K I(R)R                    | 134.15 | 520.9473 | 1560.823 | 0.0046  | 2.9   | 4.56 | 20151.2  | 4.48  | HUMAN | GV3218 | Heat shock protein HSP 90-alpha (Fragment)                    |
| 7660 | dirMS_041121_NAR_50mM_plus.18039.18039.3   | 3 | 11.4  | 0 | 3.36E+05  | (K)ILPHV(K)K/L I P L P V D I G L(K)K                   | 163.23 | 430.2706 | 1288.799 | -0.0015 | -1.2  | 7.4  | 45578.2  | 7.83  | HUMAN | BD4FL2 | Isocitrate dehydrogenase [NADP]                               |
| 7661 | dirMS_041121_NAR_60mM_plus.15485.15485.3   | 3 | 11.4  | 0 | 3.36E+05  | (K)SPKGA(K)K/S P G A A M V E M I A/D G Y I A V D R(A)  | 137.83 | 623.2943 | 1867.868 | 0.0007  | 0.3   | 4.56 | 64759.2  | 8.88  | HUMAN | PL4866 | Heterogeneous nuclear ribonucleoprotein L                     |
| 7662 | dirMS_041121_NAR_120mM_minus.13021.13021.4 | 4 | 11.39 | 0 | 1.35E+05  | (R)HATLAE(R)R/H A T A V L E I L S /E D L E Q A R K(R)F | 138.55 | 489.0065 | 1953.004 | 0.0006  | 0.3   | 4.91 | 23493.8  | 5.45  | HUMAN | RVY13  | Myosin-10                                                     |
| 7663 | dirMS_041121_NAR_120mM_minus.7981.7981.3   | 3 | 11.39 | 0 | 2.26E+05  | (R)IARSDG(R)R/A R S D E G L I S P I A T T(R)R          | 97.93  | 491.9127 | 1472.729 | -0.0027 | -1.8  | 4.49 | 31923.6  | 4.85  | HUMAN | BZ7596 | Tropomyosin alpha-1 chain                                     |
| 7664 | dirMS_041121_NAR_30mM_minus.15716.15716.2  | 2 | 11.39 | 0 | 9.77E+04  | (R)IGSTDN(R)G S/T/D/N L/V/M/D I E R(A)                 | 107.83 | 683.3009 | 1365.595 | -0.0006 | -0.4  | 3.84 | 58214.7  | 5.25  | HUMAN | BD4E6T | T-complex protein 1 subunit theta                             |
| 7665 | dirMS_041121_NAR_30mM_minus.8452.8514.2    | 2 | 11.39 | 0 | 3.72E+06  | (R)IQLEQ(R)R/L I E I L E /Q/R(R)                       | 100.12 | 458.2488 | 915.489  | 0.0009  | 1     | 4.53 | 31923.6  | 4.85  | HUMAN | BZ7596 | Tropomyosin alpha-1 chain                                     |
| 7666 | dirMS_041121_NAR_40mM_minus.15577.15577.3  | 3 | 11.39 | 1 | 1.682E+05 | (K)ILPLVSD(K)K L I P L V N S /E V F I H D V A(K)K      | 180.33 | 605.3511 | 1814.042 | -0.0054 | -1.9  | 4.56 | 93778.8  | 6.4   | HUMAN | PL1216 | Glycyl phosphorylase, brain form                              |
| 7667 | dirMS_041121_NAR_50mM_plus.18064.18064.2   | 2 | 11.39 | 1 | 1.82E+06  | (R)IUGAS(R)F/T/R/G/S/A/M/N/E/L T(R)                    | 121.1  | 500.787  | 1551.979 | -0.0071 | -0.7  | 9.7  | 50943.9  | 6.04  | HUMAN | DRBIN1 | Drebrin                                                       |
| 7668 | dirMS_041121_NAR_50mM_plus.16761.16761.3   | 3 | 11.39 | 0 | 2.59E+05  | (K)IVNSH(K)K/L V S H N S /D V I N /V G S /L Q D R(A)   | 163.72 | 626.8779 | 1878.056 | -0.0006 | -3.4  | 8.8  | 67312.1  | 4.71  | HUMAN | GV1119 | DBiD domain-containing actin-binding protein                  |
| 7669 | dirMS_041121_NAR_50mM_minus.4955.4955.3    | 3 | 11.39 | 1 | 2.84E+05  | (R)IMQDNT(R)M Q/N D T/A/E N T A/E L I K(E)K(S)         | 83     | 638.2738 | 1896.813 | 15.9941 | 0.4   | 4.14 | 54214.9  | 5.66  | HUMAN | CN813  | Caldesmon (Fragment)                                          |
| 7670 | dirMS_041121_NAR_20mM_plus.17076.17076.2   | 2 | 11.39 | 0 | 1.91E+05  | (K)IVDAAV(K)Q Q I A/V/A/S/E Q L L E R(N)M              | 188.3  | 776.9419 | 1552.881 | -0.0004 | -2.6  | 5.97 | 10728.1  | 9.15  | HUMAN | Q9Y14  | Mitochondrial import inner membrane translocase subunit Tim13 |
| 7671 | dirMS_041121_NAR_20mM_plus.18604.18604.2   | 2 | 11.39 | 0 | 2.69E+05  | (R)IUGAS(R)F/T/R/G/S/A/M/N/E/L T(R)                    | 121.1  | 500.787  | 1551.979 | -0.0071 | -0.7  | 9.7  | 50943.9  | 6.04  | HUMAN | DRBIN1 | Drebrin                                                       |
| 7672 | dirMS_041121_NAR_20mM_plus.6018.6018.3     | 3 | 11.39 | 0 | 1.02E+06  | (R)IMQDNT(R)M Q/N D T/A/E N T A/E L I K(E)K(S)         | 100.27 | 534.8861 | 1538.67  | 63.9743 | 3.4   | 9.5  | 43979.5  | 8.92  | HUMAN | FSQV23 | Non-PQO domain-containing actin-binding protein               |
| 7673 | dirMS_041121_NAR_30mM_plus.13725.13725.2   | 2 | 11.39 | 0 | 1.97E+05  | (K)IVANVL(K)K A I N I /E I A /Y Y(R)R(A)               | 124.78 | 563.7923 | 1126.589 | -0.0118 | -10.5 | 5.97 | 71165.3  | 5.17  | HUMAN | IKS13  | Clastrin heavy chain 1                                        |
| 7674 | dirMS_041121_NAR_30mM_plus.15339.15339.2   | 2 | 11.39 | 0 | 5.45E+05  | (R)YVYVY(R)R/V/P/N/S/N/L/K(K)K                         | 133.13 | 571.8278 | 1146.652 | -0.0024 | -3    | 8.59 | 44227.3  | 7.81  | HUMAN | ETC086 | T-complex protein 1 subunit alpha                             |
| 7675 | dirMS_041121_NAR_30mM_plus.17658.17658.2   | 2 | 11.39 | 0 | 1.03E+06  | (R)NINLGGT(R)R/N I L G /G T V Y T(R)R                  | 145.63 | 488.7809 | 976.557  | -0.0039 | -3    | 9.75 | 45578.2  | 7.83  | HUMAN | BD4FL2 | Isocitrate dehydrogenase [NADP]                               |
| 7676 | dirMS_041121_NAR_30mM_plus.19908.19908.2   | 2 | 11.39 | 0 | 2.45E+0   |                                                        |        |          |          |         |       |      |          |       |       |        |                                                               |



|      |                                            |   |       |   |                |                                                                                     |        |          |          |         |       |      |          |      |       |        |                                                                          |
|------|--------------------------------------------|---|-------|---|----------------|-------------------------------------------------------------------------------------|--------|----------|----------|---------|-------|------|----------|------|-------|--------|--------------------------------------------------------------------------|
| 7844 | dirMS_041712_NAR_50mM_plus2.8902.8902.3    | 3 | 11.3  | 0 | 1.53E+06       | (RI)ESGMC(R)E I S G M Q N R N I / H T (K/T)                                         | 113.25 | 492.5704 | 1475.698 | -0.0015 | -1    | 6.75 | 56607.4  | 5.37 | HUMAN | F8VXB4 | Keratin, type II cytoskeletal 8                                          |
| 7845 | dirMS_041712_NAR_60mM_plus.2113.2113.3     | 3 | 11.3  | 1 | 1.05E+05       | (K)AKNEA(K)K/A/K I N E A V E I G D L (K/A)                                          | 173.75 | 529.9643 | 1587.878 | 0.0009  | 0.6   | 6.18 | 127185.3 | 7.05 | HUMAN | P07814 | Bifunctional glutamate/proline- <i>tRNA</i> ligase                       |
| 7846 | dirMS_041712_NAR_50mM_plus.7204.7204.2     | 3 | 11.3  | 0 | 5.06E+05       | (R)IGPFAE(R)G V G P (G)G V (K)K                                                     | 97.63  | 478.2532 | 957.511  | -0.0001 | -0.1  | 6.75 | 972.55   | 8.74 | HUMAN | Q51749 | Protein disulfide isomerase 2, isoform A                                 |
| 7847 | dirMS_041712_NAR_60mM_plus.7597.7620.3     | 3 | 11.3  | 1 | 9.64E+05       | (R)IAEVAE(R)Y/L/A/E/D/G/L/K(K)                                                      | 80.83  | 427.2226 | 1279.653 | 0.0004  | 0.3   | 4.56 | 19186.1  | 4.48 | HUMAN | BD0256 | 14-3-3 protein zeta/delta                                                |
| 7848 | dirMS_041712_NAR_30mM_minus.10102.10102.2  | 2 | 11.29 | 0 | 6.04E+04       | (R)MVAAL(R)M/A/L/G/D/P/K(K)                                                         | 109.15 | 483.2423 | 965.476  | 0.0012  | 1.3   | 5.59 | 470342.8 | 6.83 | HUMAN | E7LUY0 | DNA-dependent protein kinase catalytic subunit                           |
| 7849 | dirMS_041712_NAR_30mM_minus.18162.18162.2  | 2 | 11.29 | 0 | 2.92E+05       | (K)ILGGLL(K)L I C G L/L/A/E R (L)                                                   | 152.05 | 522.7963 | 1044.587 | -0.0017 | -1.6  | 6    | 12647.2  | 8.07 | HUMAN | P14174 | Macrophage migration inhibitory factor                                   |
| 7850 | dirMS_041712_NAR_30mM_minus.15358.1535.2   | 2 | 11.29 | 0 | 1.56E+05       | (R)IAQAE(R)K/L/A/E/A/L/R(K)                                                         | 101.65 | 482.2147 | 957.379  | -0.0001 | -0.1  | 6.75 | 972.55   | 8.74 | HUMAN | Q51749 | Protein disulfide isomerase 2, isoform A                                 |
| 7851 | dirMS_041712_NAR_40mM_minus.14105.14105.3  | 3 | 11.29 | 0 | 6.49E+05       | (R)HJFLPL(R)H H/F/LA/T(Y)N/P/S I A E (K)                                            | 167.75 | 586.3246 | 1756.963 | -0.004  | -2.3  | 6.75 | 49012.3  | 4.9  | HUMAN | ASMU81 | Tubulin alpha-4A chain                                                   |
| 7852 | dirMS_041712_NAR_50mM_minus.8650.8650.3    | 3 | 11.29 | 0 | 1.58E+06       | (R)IEVHQH(R)E I / V / H Q / Q / C / C / N / Q / K / F                               | 116.8  | 608.3087 | 1822.923 | -0.0113 | -6.2  | 6.85 | 40069.4  | 4.83 | HUMAN | E7EWR1 | Tubulin beta chain                                                       |
| 7853 | dirMS_041712_NAR_120mM_plus.6689.6689.2    | 2 | 11.29 | 0 | 5.08E+05       | (R)HJLTFE(R)R V / L / I / T / G / E / F / K (K)                                     | 88.68  | 480.743  | 960.479  | 0.0002  | 0.2   | 5.4  | 26394.9  | 6.5  | HUMAN | BSMDF5 | GTP-binding nuclear protein Ran                                          |
| 7854 | dirMS_041712_NAR_120mM_plus.7124.7183.3    | 3 | 11.29 | 1 | 1.73E+06       | (R)HJLTFE(R)R V / L / I / T / G / E / F / K (K)                                     | 91.05  | 403.2207 | 1201.653 | -0.006  | -5    | 6.14 | 13588.1  | 4.66 | HUMAN | FBV077 | Keratin, type II cytoskeletal 8 (Fragment)                               |
| 7855 | dirMS_041712_NAR_20mM_plus.13862.13862.2   | 2 | 11.29 | 0 | 1.78E+05       | (R)KPLATL(R)K P / L / I / L / A / T / P / L / P / K (K)                             | 106.48 | 481.2167 | 1226.71  | -0.0058 | -4.7  | 5.88 | 61016.6  | 9.4  | HUMAN | BD4L08 | Probable ATP-dependent RNA helicase DDX5                                 |
| 7856 | dirMS_041712_NAR_20mM_plus.17840.17840.2   | 2 | 11.29 | 0 | 1.54E+05       | (R)TVLSLE(R)T V I C I / S / L / E / D / L / D / S / M / R (N)                       | 194.82 | 753.8776 | 1506.747 | 0.0011  | 0.7   | 4.03 | 43773.3  | 5.26 | HUMAN | FBV219 | Keratin, type I cytoskeletal 18                                          |
| 7857 | dirMS_041712_NAR_30mM_plus.10228.10246.2   | 2 | 11.29 | 0 | 8.95E+05       | (R)ITGLDVE(R)I D / I / D / V / E / V / K (K)                                        | 100.82 | 437.7293 | 874.452  | -0.0003 | -0.4  | 4.03 | 61018.6  | 9.44 | HUMAN | BD4L08 | Probable ATP-dependent RNA helicase DDX5                                 |
| 7858 | dirMS_041712_NAR_30mM_plus.10272.10272.2   | 2 | 11.29 | 0 | 4.82E+05       | (R)ILGAPL(R)I G / A / P / A / L / T / S / R (K)                                     | 107.23 | 443.2607 | 885.511  | -0.0011 | -1.3  | 9.75 | 45186.1  | 9.89 | HUMAN | BD4L04 | Serine hydroxymethyltransferase                                          |
| 7859 | dirMS_041712_NAR_30mM_plus.10673.10760.2   | 2 | 11.29 | 0 | 1.29E+05       | (R)IGGLA(R)G G D / I / M / G / V / D / R (K)                                        | 110.49 | 492.2262 | 916.434  | 0.0034  | 3.4   | 4.21 | 51260.6  | 5.39 | HUMAN | PS1078 | Heterogeneous nuclear ribonucleoprotein K                                |
| 7860 | dirMS_041712_NAR_30mM_plus.5940.5967.2     | 2 | 11.29 | 0 | 4.28E+05       | (K)MIVASV(K)M / V / A / S / K / D (K)                                               | 85.65  | 400.2035 | 799.402  | -0.0021 | -2.7  | 8.34 | 22956    | 8.8  | HUMAN | EP9225 | Cofilin-1                                                                |
| 7861 | dirMS_041712_NAR_40mM_plus.16569.16569.3   | 3 | 11.29 | 0 | 1.92E+05       | (R)IVAAGL(R)I V A / A / G / P / L / P / L / V / H T / D / A / A / Q / A / G / K (K) | 164.08 | 648.041  | 1942.112 | -0.0036 | -1.8  | 6.71 | 17974.2  | 4.97 | HUMAN | C3N1L5 | Selenocysteine lysine (Fragment)                                         |
| 7862 | dirMS_041712_NAR_50mM_plus.14233.14233.3   | 3 | 11.29 | 0 | 1.02E+05       | (R)IVWVSV(R)I V / V / V / S / N / D / G / T / H / A / K (T)                         | 142.87 | 534.9466 | 1602.828 | -0.0022 | -1.4  | 6.71 | 63374.2  | 8.64 | HUMAN | P06744 | Glucose-6-phosphatase isomerase                                          |
| 7863 | dirMS_041712_NAR_50mM_plus.20074.20074.3   | 3 | 11.29 | 0 | 2.78E+05       | (R)ILGLPF(R)I Q / S / P / F / L / T / H / N / L / K (A)                             | 173.85 | 532.3178 | 1594.931 | 0.0073  | 4.6   | 8.76 | 175851.7 | 5.01 | HUMAN | Q14160 | Protein-carboxyle homolig                                                |
| 7864 | dirMS_041712_NAR_60mM_plus.10162.10162.3   | 3 | 11.29 | 1 | 1.48E+06       | (K)IFRQDE(K)F / R / D / E / A / V / A / G / V / D / G / P / R (T)                   | 111.47 | 551.593  | 1652.766 | 0.0019  | 1.1   | 4.32 | 55361.8  | 6.42 | HUMAN | G5E4S2 | Protein disulfide isomerase family A, member 3, isoform CRA_b            |
| 7865 | dirMS_041712_NAR_60mM_plus.16235.16235.3   | 3 | 11.29 | 0 | 5.41E+05       | (K)IWGLD(K)I W / J / G / L / D / S / G / K / P / R (K)                              | 141.97 | 452.5864 | 1355.743 | 0.0016  | 1.2   | 8.75 | 44227.3  | 7.81 | HUMAN | E7EQE6 | T-complex protein 1 subunit alpha                                        |
| 7866 | dirMS_041712_NAR_120mM_minus.11948.11948.4 | 4 | 11.28 | 2 | 6.11E+05       | (R)IYSLTD(R)R F / S / L / T / D / P / S / K / L / D / S / G / E / K / L (K)         | 119.2  | 478.2478 | 1909.975 | -0.0059 | -3.1  | 4.78 | 83605    | 4.97 | HUMAN | P08238 | Heat shock protein 90-beta                                               |
| 7867 | dirMS_041712_NAR_120mM_minus.15875.16039.4 | 4 | 11.28 | 1 | 1.70E+06       | (K)QLGADL(K)E / A / D / Q / L / H / F / Y / A / K / R (A)                           | 140.95 | 457.489  | 1826.976 | -0.0019 | -1.1  | 5.45 | 80254.2  | 5.05 | HUMAN | BD4PK4 | Alpha actinin 4 short isoform                                            |
| 7868 | dirMS_041712_NAR_120mM_minus.7962.7970.2   | 2 | 11.28 | 0 | 1.29E+05       | (K)MIGD(K)M / M / G / I / G / V / K (K)                                             | 97.72  | 458.7226 | 916.434  | 0.0034  | 3.7   | 8.34 | 17219.2  | 5.69 | HUMAN | Q51749 | Protein disulfide isomerase 2, isoform A                                 |
| 7869 | dirMS_041712_NAR_20mM_minus.12344.12344.3  | 3 | 11.28 | 0 | 7.45E+05 M37m  | (R)IAVLVDU(R)I V / L / V / D / L / E / P / G / T / M / D / S / V / R (K)            | 172.42 | 539.9423 | 1601.82  | 1.992   | -1.8  | 4.03 | 13112.4  | 5.23 | HUMAN | FBW813 | Tubulin beta-8 chain                                                     |
| 7870 | dirMS_041712_NAR_20mM_minus.8230.8337.2    | 2 | 11.28 | 0 | 1.66E+05 M13m  | (K)ILIEEM(K)I L / L / E / M / E / R (K)                                             | 132.15 | 524.2783 | 1031.555 | 1.95399 | -0.9  | 4.53 | 20203.9  | 6.24 | HUMAN | HDY0G0 | Creatine kinase B-type (Fragment)                                        |
| 7871 | dirMS_041712_NAR_40mM_minus.12388.12388.3  | 3 | 11.28 | 0 | 6.99E+04       | (R)IVPALP(R)I V / A / L / P / E / L / V / E / V / K / P (K)                         | 156.27 | 533.7926 | 1599.899 | 0.004   | 2.5   | 4.68 | 6962.6   | 5.58 | HUMAN | BD4QB4 | Plastin-3                                                                |
| 7872 | dirMS_041712_NAR_30mM_minus.14667.14667.3  | 3 | 11.28 | 0 | 1.16E+05 M159m | (R)IYVSTY(R)I V / A / L / P / E / L / V / E / V / K / P (K)                         | 117.32 | 441.7417 | 1031.555 | -0.0017 | -1.5  | 6.75 | 972.55   | 8.74 | HUMAN | Q51749 | Protein disulfide isomerase 2, isoform A                                 |
| 7873 | dirMS_041712_NAR_30mM_minus.11368.11368.3  | 3 | 11.28 | 0 | 1.95E+04       | (R)ILIVSTY(R)I L / I / V / I / S / T / P / T / G / E / F / D / K (K)                | 193.12 | 655.6428 | 1964.921 | -0.0072 | -4.3  | 6.07 | 44664.6  | 5.33 | HUMAN | BK3059 | RuvB-like 2                                                              |
| 7874 | dirMS_041712_NAR_50mM_minus.11772.11772.3  | 3 | 11.28 | 0 | 1.97E+05 M221m | (K)MILDAE(K)M / L / V / D / L / E / D / V / R / P / D / E / K (A)                   | 134.93 | 592.6214 | 1759.853 | 1.95966 | 0.9   | 4.1  | 107710.1 | 5.38 | HUMAN | B7YV16 | Actinin alpha 1 isoform 3                                                |
| 7875 | dirMS_041712_NAR_50mM_minus.12438.12438.3  | 3 | 11.28 | 0 | 2.71E+05       | (K)AASDIA(K)A / S / D / I / A / M / T / L / P / P / T / H / R (K)                   | 139.15 | 407.3158 | 1819.937 | -0.0042 | -2.3  | 5.32 | 12926.1  | 4.4  | HUMAN | E7W420 | 14-3-3 protein epsilon (Fragment)                                        |
| 7876 | dirMS_041712_NAR_50mM_minus.83317.83317.3  | 3 | 11.28 | 0 | 1.45E+05 M148m | (R)IAASDIA(K)A / S / D / I / A / M / T / L / P / P / T / H / R (K)                  | 139.15 | 407.3158 | 1819.937 | -0.0042 | -2.3  | 5.32 | 12926.1  | 4.4  | HUMAN | E7W420 | 14-3-3 protein epsilon (Fragment)                                        |
| 7877 | dirMS_041712_NAR_60mM_minus.9784.9803.3    | 3 | 11.28 | 1 | 3.78E+05       | (R)IYLAFAE(R)I Y / L / A / E / A / T / G / N / D / R (K)                            | 114.65 | 462.2282 | 1384.686 | -0.0155 | -11.2 | 6.07 | 12926.1  | 4.4  | HUMAN | E7W420 | 14-3-3 protein epsilon (Fragment)                                        |
| 7878 | dirMS_041712_NAR_120mM_plus.20607.20607.4  | 4 | 11.28 | 0 | 2.15E+05       | (K)IAADWF(K)A / A / V / D / W / F / D / G / E / F / H / G / N / I / K (K)           | 161.23 | 491.0027 | 1960.992 | -0.0026 | -1.3  | 5.38 | 49181    | 4.93 | HUMAN | K7EPT6 | TATA-binding protein-associated factor 2N                                |
| 7879 | dirMS_041712_NAR_20mM_plus.16754.16754.2   | 2 | 11.28 | 0 | 1.25E+05       | (R)ILLEAQA(R)I L / E / A / I / A / T / G / V / D / I / P / K (E)                    | 185.92 | 769.9362 | 1538.879 | -0.0137 | -8.9  | 4.37 | 334221.3 | 6.44 | HUMAN | P15924 | Desmoplakin                                                              |
| 7880 | dirMS_041712_NAR_30mM_plus.11384.11384.2   | 2 | 11.28 | 0 | 1.33E+05       | (R)IVQMM(R)I L / V / D / M / Q / V / R (K)                                          | 112.3  | 447.2119 | 893.422  | -0.0054 | -6.1  | 4.37 | 73886.6  | 6.73 | HUMAN | BD4X07 | ATP-dependent RNA helicase DDX52                                         |
| 7881 | dirMS_041712_NAR_30mM_plus.12323.12323.2   | 2 | 11.28 | 0 | 2.55E+05       | (R)ILVWVW(R)I L / V / W / V / W / K / D / R (K)                                     | 143.57 | 528.8113 | 1055.621 | -0.0054 | -5.2  | 5.84 | 91068.8  | 9.53 | HUMAN | P23260 | DNA replication licensing factor MCM3                                    |
| 7882 | dirMS_041712_NAR_40mM_plus.10330.10330.2   | 2 | 11.28 | 0 | 9.40E+04       | (K)IGVIGTK(K)G / V / G / G / V / P / V / G / V (R)                                  | 125.75 | 513.3081 | 1025.61  | -0.0013 | -1.2  | 9.75 | 50482.3  | 9.31 | HUMAN | P68104 | Elongation factor 1-alpha 1                                              |
| 7883 | dirMS_041712_NAR_60mM_plus.12628.12648.3   | 3 | 11.28 | 0 | 1.29E+06       | (K)AADGRR(K)A / D / I / D / R / P / P / V / Q / V / K (S)                           | 121.67 | 448.2414 | 1342.711 | -0.0017 | -1.3  | 6    | 15633.5  | 9.15 | HUMAN | H3BMQ8 | Fructose-bisphosphate aldolase A (Fragment)                              |
| 7884 | dirMS_041712_NAR_60mM_plus.15880.15880.3   | 3 | 11.28 | 0 | 2.66E+05       | (K)NFDLPR(K)M / T / D / L / R / P / G / V / R (L)                                   | 139.93 | 429.248  | 1285.738 | 0.0011  | -6.3  | 9.6  | 33192.3  | 6.77 | HUMAN | BD4N45 | Sadenosylmethionine synthase                                             |
| 7885 | dirMS_041712_NAR_50mM_plus.16424.16424.3   | 3 | 11.28 | 1 | 5.15E+05       | (R)ITDGVN(R)I T / D / G / V / N / G / V / R (K)                                     | 115.18 | 478.2478 | 1909.975 | -0.0017 | -1.6  | 6.75 | 972.55   | 8.74 | HUMAN | C3N1L5 | Selenocysteine lysine 124                                                |
| 7886 | dirMS_041712_NAR_60mM_plus.16807.16807.3   | 3 | 11.28 | 0 | 2.02E+05       | (K)NFKST(K)K / I / D / S / L / T / V / E / L / A / N / L / Y / K (N)                | 144.67 | 524.6388 | 1571.019 | -0.0051 | -1    | 6.07 | 13242.4  | 4.17 | HUMAN | EP9PH5 | Acidic leucine-rich nuclear phosphoprotein 32 family member F (Fragment) |
| 7887 | dirMS_041712_NAR_120mM_minus.12350.12350.3 | 3 | 11.27 | 0 | 1.03E+06       | (K)ITTFWAC(K)F / I / T / A / W / I / C / N / S / H / L / R (K)                      | 121.72 | 464.8871 | 1392.648 | -0.0001 | -0.7  | 9.44 | 104488.6 | 5.36 | HUMAN | BK2C55 | Actinin, alpha 2, isoform CRA_b                                          |
| 7888 | dirMS_041712_NAR_30mM_minus.13080.13080.2  | 2 | 11.27 | 0 | 2.84E+05       | (K)SILELPE(K)I S / I / E / L / I / D / R / I / F (F)                                | 124.53 | 643.8325 | 1286.659 | -0.0009 | -0.7  | 4.14 | 26616.1  | 5.68 | HUMAN | EP9PU0 | Epipkalin                                                                |
| 7889 | dirMS_041712_NAR_30mM_minus.14842.14842.2  | 2 | 11.27 | 0 | 2.59E+04       | (R)IL33(R)I 33 / 26 / 11 / 98 / 15 / 19 / 00 / 00 / 00                              | 134.33 | 491.2611 | 981.519  | -0.0007 | -3.8  | 8.75 | 26516.1  | 5.68 | HUMAN | EP9PU0 | Epipkalin                                                                |
| 7890 | dirMS_041712_NAR_30mM_minus.16973.17191.2  | 2 | 11.27 | 0 | 5.12E+05       | (K)NSLSVE(K)S / L / I / E / Y / A / F / N / K / I (K)                               | 146.62 | 652.3031 | 1303.599 | 0.0002  | 0.2   | 6    | 45508.6  | 5.5  | HUMAN | AKB7Q2 | Heat shock cognate 71 kDa protein                                        |
| 7891 | dirMS_041712_NAR_30mM_minus.9259.9355.2    | 2 | 11.27 | 0 | 5.64E+05       | (R)RTVYDN(R)T V I / H / D / N / V / G / E / R (T)                                   | 105.1  | 533.7595 | 1066.516 | -0.0046 | -4.4  | 4.37 | 51524.1  | 5.8  | HUMAN | FSH8I2 | Protein disulfide-isomerase                                              |
| 7892 | dirMS_041712_NAR_40mM_minus.14315.14315.3  | 3 | 11.27 | 0 | 1.61E+05       | (K)TGTSDF(K)T G / V / S / D / W / F / A / N / D / L / A / V / V / D / R (R)         | 168.48 | 640.3454 | 1919.023 | -       |       |      |          |      |       |        |                                                                          |

|      |                                            |   |       |   |           |                                                      |        |          |           |         |       |      |           |             |        |                                                                             |
|------|--------------------------------------------|---|-------|---|-----------|------------------------------------------------------|--------|----------|-----------|---------|-------|------|-----------|-------------|--------|-----------------------------------------------------------------------------|
| 7953 | dirMS_041712_NAR_30mM_plus2.18548.18628.3  | 3 | 11.24 | 0 | 3.37E+05  | (RIGVDSR (RIG VVV D S E D I)P/LN/L/S/R/E)            | 150.87 | 505.2679 | 1513.786  | 0.0035  | 2.3   | 4.03 | 74494.3   | 7.79 HUMAN  | F5H897 | Heat shock protein 75 kDa, mitochondrial                                    |
| 7954 | dirMS_041712_NAR_30mM_plus2.19397.19449.2  | 2 | 11.24 | 0 | 2.38E+05  | (KINFSAG (KIN F)S/G/A/E/L/E/G L V/R/K)               | 155.45 | 646.3361 | 1291.664  | 0.0008  | 0.6   | 4.53 | 71024.9   | 6.25 HUMAN  | B4D4F4 | Vanicupine fusing ATPase                                                    |
| 7955 | dirMS_041712_NAR_30mM_plus2.16441.1641.3   | 0 | 11.24 | 0 | 2.02E+05  | (RIGVDSR (RIG VVV D S E D I)P/LN/L/S/R/E)            | 89.17  | 4        | 3142.0000 | -0.0216 | -14.4 | 8.49 | 42889.1   | 8.18 HUMAN  | F5H897 | Ras GTPase-activating protein-binding protein 3                             |
| 7956 | dirMS_041712_NAR_30mM_plus2.12462.12462.3  | 3 | 11.24 | 2 | 1.264E+05 | (RINSLNP (RIN S)I/E/L/N/P T Q/D/V L/V/K/R)           | 113.58 | 528.6368 | 1583.9    | -0.0048 | -2.6  | 5.79 | 198852.6  | 5.95 HUMAN  | AKENK7 | Na <sup>+</sup> /K <sup>+</sup> -ATPase and GRP domain-containing protein 1 |
| 7957 | dirMS_041712_NAR_30mM_plus2.15688.15750.3  | 3 | 11.24 | 1 | 1.23E+05  | (KJELKIDIR (KJL K L I D I)P/N/P/K C/P/R/T)           | 150.97 | 522.2931 | 1564.869  | -0.0046 | -2.9  | 4.48 | 83605     | 6.48 HUMAN  | P0R238 | Heat shock protein HSP 90 beta                                              |
| 7958 | dirMS_041712_NAR_60mM_plus.12889.12889.3   | 3 | 11.24 | 0 | 3.71E+06  | (RITLPPDR (RIT)T/R R D V/P/L P/E/R/S)                | 123.6  | 436.2506 | 1306.748  | -0.0105 | -8    | 6.07 | 1606853.1 | 6.11 HUMAN  | RFVU15 | YLP motif-containing protein 1                                              |
| 7959 | dirMS_041712_NAR_60mM_plus.17356.18038.3   | 1 | 11.24 | 1 | 3.47E+05  | (KIKVAVLY (KIK V)A/V/L/V/L D/P/D/P/R/K/R/P)          | 151.28 | 504.9379 | 1512.821  | -0.0218 | -11.4 | 8.49 | 42889.1   | 8.18 HUMAN  | E3K475 | Nucleosome assembly protein 1-like 1                                        |
| 7960 | dirMS_041712_NAR_60mM_plus.21213.21213.3   | 3 | 11.24 | 0 | 2.16E+05  | (KJALSEFGR (KJL)E/L/E/S/P/E/R P/F L A/L/G G/A/N/V/R) | 147.10 | 590.3367 | 1476.890  | -0.001  | 0     | 6.40 | 41827.5   | 7 HUMAN     | B7Z7A8 | Phosphoglycerate kinase                                                     |
| 7961 | dirMS_041712_NAR_60mM_plus.7188.7305.3     | 3 | 11.24 | 0 | 7.57E+05  | (KJLMELH (KJL)M/E/L/H/G/H G E S S G/A/K)             | 95.93  | 444.5486 | 1331.626  | 0.0053  | 3.9   | 5.4  | 16650     | 9.47 HUMAN  | D6R986 | 40S ribosomal protein S3a                                                   |
| 7962 | dirMS_041712_NAR_20mM_minus.10616.10616.2  | 2 | 11.23 | 0 | 1.03E+05  | (RINLPNAP (RIN L)I/P/N A S Q A E S K/V)              | 154.5  | 652.8447 | 1304.685  | -0.0024 | -1.8  | 6    | 19186.1   | 4.48 HUMAN  | BD42E6 | 14-3-3 protein beta/delta                                                   |
| 7963 | dirMS_041712_NAR_30mM_plus.17194.17194.2   | 2 | 11.23 | 0 | 1.03E+05  | (KIRGIDGR (KIR G)G/V/G/L/I/L/L D/R/K/R/P)            | 147.92 | 585.3352 | 1169.664  | -0.0006 | -0.5  | 5.84 | 34524.7   | 5.4 HUMAN   | ABM1V7 | Protein SC1C3/homolog                                                       |
| 7964 | dirMS_041712_NAR_40mM_minus.12817.12817.3  | 3 | 11.23 | 0 | 2.46E+05  | (RIGVDSR (RIG VVV D S E D I)P/LN/L/S/R/E)            | 150.97 | 505.2679 | 1513.786  | -0.0017 | -11.4 | 8.49 | 42889.1   | 8.18 HUMAN  | F5H897 | ATP-citrate lyase                                                           |
| 7965 | dirMS_041712_NAR_50mM_minus2.14330.14330.3 | 3 | 11.23 | 0 | 4.31E+05  | (RQIQPFHR (RQI)F/H/E/Q/L/V/T G E/K)                  | 145.72 | 470.9286 | 1410.774  | -0.0027 | -1.9  | 6.75 | 27836     | 8 HUMAN     | Q9H853 | Putative tubulin-like protein alpha-4B                                      |
| 7966 | dirMS_041712_NAR_50mM_minus2.15633.15633.3 | 3 | 11.23 | 1 | 1.482E+05 | (KQGGGLG (KQ G)G L P/M N I/P V L S D/P K R/T)        | 157.49 | 591.6566 | 1778.598  | -0.0029 | -1.6  | 6.75 | 22338.2   | 8.65 HUMAN  | Q6K830 | Peroxiredoxin-1                                                             |
| 7967 | dirMS_041712_NAR_20mM_plus.14960.14960.2   | 2 | 11.23 | 0 | 1.45E+05  | (KIVLQIT (KIV L)Q L/V/G Q/T/G G T/P/V/P/S K/A)       | 174.65 | 775.9244 | 1546.848  | -0.006  | -2.9  | 5.97 | 20480.2   | 9.91 HUMAN  | PE2913 | 60S ribosomal protein L11                                                   |
| 7968 | dirMS_041712_NAR_20mM_plus.15973.15973.2   | 2 | 11.23 | 0 | 2.46E+05  | (RIGVDSR (RIG VVV D S E D I)P/LN/L/S/R/E)            | 179.95 | 757.3954 | 1512.786  | -0.0017 | -11.4 | 8.49 | 74494.3   | 7.79 HUMAN  | F5H897 | Heat shock protein 75 kDa, mitochondrial                                    |
| 7969 | dirMS_041712_NAR_20mM_plus.16622.16622.2   | 2 | 11.23 | 0 | 1.71E+05  | (KRIAFATAI (KRI)A/F/A/V/A I/A/K)                     | 185.5  | 474.2987 | 947.592   | -0.0003 | -2.4  | 8.75 | 17718.4   | 10.99 HUMAN | PE6269 | 40S ribosomal protein S18                                                   |
| 7970 | dirMS_041712_NAR_20mM_plus.18974.18974.3   | 3 | 11.23 | 0 | 1.87E+05  | (KILTETOS (KIL)T E T G S A/L/G I/P/A L A A F/K/L)    | 202.45 | 582.6516 | 1745.943  | -0.003  | -1.7  | 5.66 | 120546    | 7.82 HUMAN  | O95486 | Protein transport protein Sec2Aa                                            |
| 7971 | dirMS_041712_NAR_30mM_plus2.12925.12925.2  | 2 | 11.23 | 0 | 5.62E+05  | (RITYSSYR (RIT)S/Y/S/V N D Y L/R/A)                  | 120.42 | 619.2776 | 1237.548  | -0.0005 | -0.4  | 5.83 | 69661.6   | 9.75 HUMAN  | O95486 | RNA-binding protein 14                                                      |
| 7972 | dirMS_041712_NAR_30mM_plus2.15999.16060.2  | 2 | 11.23 | 0 | 2.92E+06  | (RINELSR (RIN)E/I/LS/L A/V/R/R)                      | 137.87 | 557.8307 | 1144.647  | 0.0075  | 6.7   | 6    | 77799.7   | 9.09 HUMAN  | FS2272 | Heterogeneous nuclear ribonucleoprotein M                                   |
| 7973 | dirMS_041712_NAR_30mM_plus2.18462.18462.2  | 2 | 11.23 | 0 | 7.81E+04  | (RIVVNSR (RIV V)N/S/S I/M/S V/R/A)                   | 145.77 | 595.8347 | 1190.656  | 0.006   | 5     | 9.72 | 30659.7   | 9.02 HUMAN  | PI6152 | Carbonyl reductase [NADPH+]                                                 |
| 7974 | dirMS_041712_NAR_30mM_plus2.19110.19110.2  | 2 | 11.23 | 0 | 3.59E+04  | (KIDAGTIA (KID A)G T I/A/V/G L V R/I/R)              | 153.85 | 600.3411 | 1199.674  | 0.0007  | 0.6   | 5.84 | 17973     | 5.16 HUMAN  | E9P165 | Heat shock cognate 71 kDa protein (Fragment)                                |
| 7975 | dirMS_041712_NAR_40mM_plus2.6132.6132.2    | 2 | 11.23 | 0 | 5.66E+04  | (KIQAPFNR (KIQ A)I/P/N/T/N R/W/R)                    | 94.88  | 474.2383 | 947.469   | 0       | 0     | 9.75 | 56491.1   | 7.78 HUMAN  | B4D7G2 | Elongation factor 1-gamma                                                   |
| 7976 | dirMS_041712_NAR_50mM_plus2.15065.15065.3  | 3 | 11.23 | 1 | 2.49E+05  | (KINSPVTO (KIN)S/P/V/T/P/D/P D I E M A Y F/K/A/K)    | 137.03 | 568.2525 | 1702.748  | 0.0041  | 2.4   | 4.68 | 34590.2   | 9.84 HUMAN  | B4P777 | 60S ribosomal protein L-5                                                   |
| 7977 | dirMS_041712_NAR_50mM_plus2.15692.15692.3  | 3 | 11.23 | 0 | 1.23E+05  | (RIGEGAR (RIG E)A/V/E/A I/A/E F D/P P S G/K/Q)       | 159.13 | 508.2614 | 1522.795  | 0.0048  | 3.1   | 6.12 | 26161     | 5.68 HUMAN  | E9P100 | Euplokin                                                                    |
| 7978 | dirMS_041712_NAR_50mM_plus2.7140.7140.2    | 2 | 11.23 | 0 | 1.04E+06  | (KRIEATNF (RIT A)I/T/N/P/P V I E Q/E K/P/K)          | 103.55 | 527.282  | 1579.833  | -0.0012 | -0.7  | 4.79 | 55361.8   | 6.42 HUMAN  | G5E452 | Protein disulfide isomerase family A, member 3, isoform CRA_b               |
| 7979 | dirMS_041712_NAR_50mM_plus2.8312.8312.3    | 3 | 11.23 | 0 | 2.33E+05  | (KIQEAGK (KIQ)Q/V/Q/L/E/L/H T G S L P/L/R)           | 110.33 | 479.2607 | 1435.765  | -0.0023 | -1.6  | 6.72 | 267260.7  | 5.95 HUMAN  | Q13085 | Acetyl-CoA carboxylase 1                                                    |
| 7980 | dirMS_041712_NAR_60mM_plus.21664.21664.3   | 3 | 11.23 | 1 | 6.91E+05  | (KIEIDVLR (KIE I)D/V/L D R C/R/K)                    | 180.78 | 452.2733 | 1354.805  | 0.001   | 0.1   | 4.56 | 58642     | 4.95 HUMAN  | F5H5D3 | Tubulin alpha-1C chain                                                      |
| 7981 | dirMS_041712_NAR_60mM_plus.6919.6919.3     | 3 | 11.23 | 0 | 5.17E+05  | (RITLPPDR (RIT)T/R R D V/P/L P/E/R/S)                | 123.6  | 436.2506 | 1306.748  | -0.0105 | -8    | 6.07 | 1606853.1 | 6.11 HUMAN  | RFVU15 | YLP motif-containing protein 1                                              |
| 7982 | dirMS_041712_NAR_120mM_minus.11349.11349.3 | 3 | 11.22 | 0 | 2.31E+05  | (KRIEGLPFR (RIG)F/L/C/P/L/P/S R/C/R/K)               | 116.42 | 418.0058 | 1230.551  | 0.0088  | 7.1   | 9.75 | 14391.8   | 4.99 HUMAN  | G3V461 | Keratin, type I cytoskeletal B8                                             |
| 7983 | dirMS_041712_NAR_120mM_minus.11928.11928.4 | 4 | 11.22 | 2 | 6.11E+05  | (RIVYSLTR (RIV E)S/L/T/D/P P S K D S G E K E L/K)    | 119.2  | 478.2478 | 1909.975  | -0.0059 | -3.1  | 4.78 | 83605     | 4.97 HUMAN  | PE0238 | Heat shock protein HSP 90 beta                                              |
| 7984 | dirMS_041712_NAR_20mM_minus.9451.9451.2    | 2 | 11.22 | 0 | 1.04E+05  | (KILVPLSR (KIL)V/P/L S/A/L/A/K)                      | 145.03 | 413.7734 | 826.54    | -0.0001 | -0.2  | 8.75 | 37701.6   | 6.36 HUMAN  | P73873 | Transaldolase                                                               |
| 7985 | dirMS_041712_NAR_20mM_minus.12293.12293.2  | 2 | 11.22 | 0 | 5.36E+05  | (RIFEGYLR (RIF E)G/Y/L/S/S L/V/S/L/R)                | 115.63 | 487.2825 | 1153.551  | -0.0019 | -1.7  | 4.53 | 26407.6   | 8.73 HUMAN  | F5H897 | Heat shock protein 75 kDa, cytoskeletal B8                                  |
| 7986 | dirMS_041712_NAR_30mM_minus2.6211.6211.2   | 2 | 11.22 | 0 | 1.72E+05  | (KIQKAEQY (RIG)K/A/E/Q/A/L/R/L/R)                    | 88.18  | 479.2592 | 957.511   | -0.0001 | -0.1  | 6.05 | 533778    | 5.74 HUMAN  | O15149 | Plectin                                                                     |
| 7987 | dirMS_041712_NAR_40mM_minus2.11797.11797.3 | 3 | 11.22 | 0 | 2.24E+05  | (RILASTLV (RIL)A/S/T/V L H L G E Y/Q/A/V/D G A R/K)  | 153.02 | 657.6842 | 1971.029  | 0.0086  | 4.4   | 5.32 | 71165.3   | 5.57 HUMAN  | K3513  | Clastrin heavy chain 1                                                      |
| 7988 | dirMS_041712_NAR_40mM_minus2.9261.9261.3   | 3 | 11.22 | 1 | 3.64E+04  | (KIQVLDQ (KIQ)Q/V/L/Q Q/D/A/D E R A E R/A/K)         | 103.93 | 666.995  | 1998.984  | -0.003  | -1.5  | 4.18 | 26611.3   | 4.47 HUMAN  | AGN128 | Putative tropomyosin alpha-3 chain protein                                  |
| 7989 | dirMS_041712_NAR_120mM_plus.9552.9552.3    | 3 | 11.22 | 1 | 1.66E+06  | (KIRGLDGR (KIR G)D S Q/N/Q/D/L/P/R/K)                | 120.23 | 622.2293 | 1228.664  | -0.0001 | -0.1  | 5.96 | 45578.2   | 7.83 HUMAN  | B4D1L2 | isochtrate dehydrogenase [NADP]                                             |
| 7990 | dirMS_041712_NAR_20mM_plus.14676.14676.2   | 2 | 11.22 | 0 | 1.03E+05  | (RIFDPTLR (RIF D)P/T/L/V/D I/S T S/R/K)              | 172.25 | 635.8413 | 1237.679  | 0.0034  | 2.7   | 5.84 | 11439.8   | 9.31 HUMAN  | G3XAN8 | Mitochondrial import inner membrane translocase subunit TimbB               |
| 7991 | dirMS_041712_NAR_30mM_plus2.14574.14574.2  | 2 | 11.22 | 0 | 3.18E+06  | (RIFPQLR (RIF)P/Q/G/A/N D L/L R/K)                   | 130.15 | 565.801  | 1130.595  | 0.0006  | -0.5  | 5.84 | 42320.8   | 4.77 HUMAN  | AKN2C8 | Putative tubulin beta chain-like protein ENSP000390377                      |
| 7992 | dirMS_041712_NAR_30mM_plus2.19941.19941.2  | 2 | 11.22 | 0 | 5.04E+04  | (KITYTSALR (KIT)F/E/S/L/V/D/F S K/A)                 | 158.22 | 586.793  | 1172.583  | -0.0047 | -4    | 4.37 | 35407.1   | 6.73 HUMAN  | E9P118 | Hydroxycy-coenzyme A dehydrogenase, mitochondrial                           |
| 7993 | dirMS_041712_NAR_30mM_plus2.20979.20979.2  | 2 | 11.22 | 0 | 2.95E+05  | (KIFDWFIL (KIF D)W/F/L/V/L/N/Q/K)                    | 165.05 | 530.785  | 1060.557  | 0.0053  | 5     | 5.84 | 9767.1    | 11.41 HUMAN | J1569  | 40S ribosomal protein S18                                                   |
| 7994 | dirMS_041712_NAR_40mM_plus2.14341.14341.3  | 3 | 11.22 | 1 | 5.33E+05  | (RILVSTTA (RIL V)S/T/A/V/E/V G L D K K/V/K)          | 150.48 | 604.66   | 1781.925  | -0.0024 | -1.9  | 4.74 | 17971     | 6.42 HUMAN  | F5H897 | Heat shock cognate 71 kDa protein (Fragment)                                |
| 7995 | dirMS_041712_NAR_40mM_plus2.17504.17504.2  | 2 | 11.22 | 0 | 2.09E+04  | (RILHFPLR (RIL)F/H/P/L/V/P V/S A E K/A)              | 169.42 | 586.3246 | 1756.963  | 0.004   | -2.3  | 6.75 | 49012.3   | 4.9 HUMAN   | AKN185 | Tubulin alpha-4A chain                                                      |
| 7996 | dirMS_041712_NAR_50mM_plus2.11498.11498.3  | 3 | 11.22 | 1 | 1.25E+06  | (KINSGNKA (KIN)G/N/A/M/N P T N T V D K A R/L)        | 127.78 | 602.6354 | 1805.896  | -0.0046 | -2.6  | 8.75 | 20069.4   | 6.74 HUMAN  | E9K554 | Heat shock cognate 71 kDa protein (Fragment)                                |
| 7997 | dirMS_041712_NAR_50mM_plus2.16166.16166.3  | 3 | 11.22 | 1 | 1.41E+06  | (KICEFDQA (KIC E)F/Q/D/V/V/L/L E K/E/K)              | 152.32 | 677.2866 | 1729.847  | -0.0013 | -0.8  | 4.68 | 61224.7   | 5.7 HUMAN   | F1P089 | 60 kDa heat shock protein, mitochondrial                                    |
| 7998 | dirMS_041712_NAR_50mM_plus.14607.14607.3   | 3 | 11.22 | 1 | 6.32E+05  | (RILGLDGR (RIL G)D S Q/N/Q/D/L/P/R/K)                | 133.45 | 483.5849 | 1448.774  | -0.0002 | -2.9  | 4.73 | 71386.6   | 8.73 HUMAN  | B4D0Q7 | ATP-dependent RNA helicase DDX3Y                                            |
| 7999 | dirMS_041712_NAR_60mM_plus.16900.16900.3   | 3 | 11.22 | 0 | 8.89E+05  | (KITTSVAKHT (KIT)T/S/V/A/L/L/A/L/A/R/K)              | 144.63 | 418.2478 | 1252.737  | -0.0083 | -6.7  | 9.44 | 34143.2   | 10.07 HUMAN | B4D723 | Protein FAM58A                                                              |
| 8000 | dirMS_041712_NAR_60mM_plus.17574.17574.3   | 3 | 11.22 | 1 | 8.23E+05  | (RDKJLNN (RDK)K/L N L/V/L/D/G F V R/L)               | 148.43 | 440.2499 | 1318.737  | -0.0014 | -1    | 5.96 | 13798.9   | 10.17 HUMAN | PE2851 | 40S ribosomal protein S25                                                   |
| 8001 | dirMS_041712_NAR_120mM_minus.9096.9096.3   | 3 | 11.21 | 0 | 8.47E+05  | (KIGTGNP (KIG T)G P/S/N P D T I A/N/D/G F V R/L)     | 103.3  | 562.2599 | 1848.767  | -0.0022 | -1.3  | 5.21 | 18511.8   | 5.62 HUMAN  | D6R70  | Heterogeneous nuclear ribonucleoprotein H (Fragment)                        |
| 8002 | dirMS_041712_NAR_30mM_minus2.5920.5920.2   | 2 | 11.21 | 0 | 1.90E+05  | (KITSYVGR (KIT)S/Y/V/R/G C/P/R/K)                    | 86.62  | 514.726  | 1028.447  | -0.0018 | -1.8  | 5.68 | 18946.7   | 5.13 HUMAN  | B4D917 | Cellular nucleic-acid-binding protein                                       |
| 8003 | dirMS_041712_NAR_40mM_minus2.13116.13116.3 | 3 | 11.21 | 0 | 9.20E+05  | (RIGVDSR (RIG VVV D S E D I)P/LN/L/S/R/E)            | 150.97 | 505.2679 | 1513.786  | -0.0022 | -12.1 | 6.04 | 4335.1    | 9.82 HUMAN  | F5H897 | ATP synthase subunit beta                                                   |
| 8004 | dirMS_0                                    |   |       |   |           |                                                      |        |          |           |         |       |      |           |             |        |                                                                             |

|      |                                           |   |       |   |                |                                                          |        |          |          |         |       |       |          |       |       |         |                                                                    |
|------|-------------------------------------------|---|-------|---|----------------|----------------------------------------------------------|--------|----------|----------|---------|-------|-------|----------|-------|-------|---------|--------------------------------------------------------------------|
| 8062 | dirMS_041712_NAR_50mM_plus2.5410.5410.3   | 3 | 11.18 | 1 | 5.11E+04       | (RIDASTLQ(R)D A I S T L Q S Q K/A/G E/T D G A K I)       | 89.17  | 569.61   | 1706.819 | -0.0037 | -2.2  | 4.56  | 9538.7   | 10.48 | HUMAN | 000479  | High mobility group nucleosome-binding domain-containing protein 4 |
| 8063 | dirMS_041712_NAR_60mM_plus.12080.12080.3  | 3 | 11.18 | 1 | 2.47E+05       | (KIDKDTM(K)K D K T D Y M(V)G/S Y/G P R I A)              | 120.28 | 534.5906 | 1601.763 | -0.0057 | -3.5  | 5.96  | 21671    | 5.37  | HUMAN | IK3R78  | Rho GTP-dissociation inhibitor 1 (Fragment)                        |
| 8064 | dirMS_041712_NAR_50mM_plus.19584.19584.2  | 3 | 11.17 | 0 | 2.92E+05       | (KIVYTAAR(K)K V L T V A A I V A V I A Q I)               | 162.75 | 281.107  | 1031.863 | -0.0026 | -1.1  | 8.75  | 40569.4  | 4.83  | HUMAN | PT1474  | Tubulin beta chain                                                 |
| 8065 | dirMS_041712_NAR_50mM_plus.14216.14216.3  | 3 | 11.17 | 0 | 1.58E+05 M31m  | (RIDJSHDR(R)L N/V/S/D M(E)F S Y/D K I)                   | 145.13 | 576.9343 | 1712.784 | -0.0046 | -5.7  | 4.22  | 19709.1  | 4.83  | HUMAN | PI1393  | Translocation-inhibited controlled tumor protein                   |
| 8066 | dirMS_041712_NAR_50mM_plus.16061.16153.3  | 3 | 11.17 | 1 | 1.58E+05       | (KJSMDFQ(K)S I/M)P/D V/L N/L K G P K V I)                | 160.03 | 514.2852 | 1540.84  | -0.0007 | -0.5  | 5.96  | 62960.7  | 5.8   | HUMAN | O92666  | Neuroblast differentiation-associated protein ANNAK                |
| 8067 | dirMS_041712_NAR_50mM_plus.17894.17894.3  | 3 | 11.17 | 1 | 1.975E+05      | (KIFTNWIK(K)F I V I N/D)P/E A E V G L R V L K G D R I S) | 170.58 | 639.0247 | 1915.065 | -0.0052 | -2.7  | 5.74  | 17630.6  | 11.82 | HUMAN | IBL305  | Profilin-1 (Fragment)                                              |
| 8068 | dirMS_041712_NAR_50mM_plus.18328.18328.3  | 3 | 11.17 | 1 | 1.835E+05      | (RKAIVR(V)K I P I P A I V A V I V A V I A Q I)           | 173.97 | 489.3206 | 1465.534 | -0.0022 | -2.2  | 10    | 21215    | 10.28 | HUMAN | BSM429  | 40S ribosomal protein S7                                           |
| 8069 | dirMS_041712_NAR_60mM_plus.8373.8373.3    | 3 | 11.17 | 1 | 2.41E+05       | (KIMYASSM(K)Y A/S Y D A I A K I)                         | 106.6  | 405.5576 | 1226.645 | -0.0133 | -10.9 | 8.26  | 22056    | 8.8   | HUMAN | EP9K25  | Cofilin-1                                                          |
| 8070 | dirMS_041712_NAR_120mM_plus.15319.15319.4 | 4 | 11.17 | 2 | 7.82E+05       | (R)JAGEVR(R)G/A/E/V R D L K A/DI005 M I R I)             | 133.22 | 451.9773 | 1804.886 | -0.0016 | -0.9  | 4.44  | 81007.1  | 6.31  | HUMAN | EP9M1V  | Plectin (Fragment)                                                 |
| 8071 | dirMS_041712_NAR_120mM_plus.9939.10383.4  | 4 | 11.17 | 2 | 2.14E+06       | (K)MIOASE(K)M Q/A/S/E I/G/S G L/P K E/V A I K I)         | 105.85 | 443.9944 | 1727.958 | -0.0017 | -1    | -8.25 | 32745.6  | 4.64  | HUMAN | PO6748  | Nucleophosmin                                                      |
| 8072 | dirMS_041712_NAR_60mM_plus.8192.8192.2    | 2 | 11.17 | 0 | 1.00E+05       | (K)ITFEDTS(K)K T F/D/T S V S I V R I)                    | 126.02 | 553.7889 | 1106.569 | -0.0017 | -1.6  | 4.7   | 80685.1  | 7.31  | HUMAN | ND5085  | Propionyl-CoA carboxylase alpha chain, mitochondrial               |
| 8073 | dirMS_041712_NAR_50mM_plus.7927.7927.2    | 2 | 11.17 | 0 | 2.02E+05       | (K)IYVYVY(K)K A I V A I A V A I V A I V A Q I)           | 160.95 | 560.2949 | 1137.527 | -0.0016 | -1.4  | 8.59  | 31075.7  | 8.16  | HUMAN | PGI074  | Glucose-6-phosphate isomerase                                      |
| 8074 | dirMS_041712_NAR_40mM_plus.12078.12078.3  | 3 | 11.17 | 1 | 2.00E+04 M467m | (R)DMTLP(R) m T/AT P/E N/V I T/D L K T Q A K I)          | 137.58 | 610.9888 | 1814.957 | -0.0018 | -3.2  | 4.56  | 24695.2  | 5.91  | HUMAN | TE7A0D  | Microtubule-associated protein                                     |
| 8075 | dirMS_041712_NAR_40mM_plus.12822.12822.2  | 2 | 11.17 | 0 | 2.97E+04       | (R)JFLNLS(R)F G L/N/V/S S I S I R(K)I)                   | 141.92 | 540.2954 | 1079.584 | -0.0009 | -0.8  | 5.75  | 24161.9  | 5.27  | HUMAN | FBZ209  | SAP domain-containing ribonucleoprotein                            |
| 8076 | dirMS_041712_NAR_60mM_plus.11260.11260.3  | 3 | 11.17 | 0 | 2.13E+05       | (K)MGLQNL(K)N A Q/V/L N I/E/L A A/H/H E I)               | 127    | 487.2488 | 1459.729 | -0.0031 | -2.1  | 5.23  | 13452    | 8.89  | HUMAN | FSH246  | Protein NAMP17                                                     |
| 8077 | dirMS_041712_NAR_50mM_plus.19043.19043.3  | 3 | 11.17 | 0 | 1.135E+05      | (R)GLGFR(R)R G H L I P L V I A V I Q I R(K)I)            | 167.77 | 514.9522 | 1541.243 | -0.0007 | -0.4  | 6.75  | 533778   | 5.74  | HUMAN | Q15149  | Plectin                                                            |
| 8078 | dirMS_041712_NAR_50mM_plus.20126.20384.3  | 3 | 11.17 | 0 | 2.10E+06       | (K)YHVLGQ(K)K H L V L S G I S G I D I F T G Y K I)       | 166.1  | 433.5898 | 1298.747 | -0.0096 | -7.4  | 6.71  | 13048.7  | 6.42  | HUMAN | C91A45  | Eukaryotic translation initiation factor 5A-2 (Fragment)           |
| 8079 | dirMS_041712_NAR_120mM_plus.7474.7474.3   | 3 | 11.16 | 1 | 1.11E+05       | (K)AQLEP(V)K A Q I/E/P V A S P A K P K V I)              | 94.93  | 488.6239 | 1463.858 | -0.0009 | -0.6  | 9.7   | 533778   | 5.74  | HUMAN | Q15149  | Plectin                                                            |
| 8080 | dirMS_041712_NAR_30mM_plus.17924.17924.2  | 2 | 11.16 | 0 | 1.60E+05       | (R)YVPSLR(R)R V/P/P/S/L R I G I)                         | 151.43 | 416.2578 | 831.509  | -0.0004 | -0.5  | 9.72  | 20576.9  | 9.84  | HUMAN | FRW044  | Heat shock protein beta-1                                          |
| 8081 | dirMS_041712_NAR_30mM_plus.15918.15918.2  | 2 | 11.16 | 0 | 1.04E+05       | (K)IVYALR(K)T V I A L W D L R I N I)                     | 159.22 | 487.2765 | 973.547  | -0.0008 | -0.8  | 5.5   | 19598    | 4.45  | HUMAN | B4D070  | Histone-binding protein TBSP4                                      |
| 8082 | dirMS_041712_NAR_40mM_plus.11611.11712.3  | 3 | 11.16 | 1 | 1.38E+05       | (K)ITVVEP(K)T V I E V E P A A D G K P L G V V V I K R I) | 152.03 | 580.008  | 1738.011 | -0.0015 | -0.8  | 5.73  | 7945.1   | 11.03 | HUMAN | C91850  | 60S ribosomal protein L28                                          |
| 8083 | dirMS_041712_NAR_50mM_plus.16500.16500.3  | 3 | 11.16 | 0 | 8.97E+04       | (L)LLDIPD(R) L I L D V I P Q/T P H K I)                  | 162.35 | 463.2805 | 1387.831 | -0.0038 | -2.7  | 6.74  | 198852.6 | 5.95  | HUMAN | AN6K77  | RanBP2-like and GRIP domain-containing protein 3                   |
| 8084 | dirMS_041712_NAR_20mM_plus.17550.17550.2  | 2 | 11.16 | 0 | 3.20E+04       | (K)ILVYND(R)K I F V I T M D A A T H I R E I)             | 192.63 | 667.3752 | 1333.747 | -0.0043 | -3.2  | 5.84  | 58214.7  | 5.82  | HUMAN | B4D67E  | T-complex protein 1 subunit theta                                  |
| 8085 | dirMS_041712_NAR_20mM_plus.19095.19095.2  | 2 | 11.16 | 0 | 2.04E+05       | (R)YVCLAIR(K)R C T I I A I I D V P G D S I V I R(S)      | 120.27 | 879.4578 | 1757.911 | -0.0019 | -1.1  | 3.93  | 132626.8 | 9.25  | HUMAN | ESM609  | 60S ribosomal protein L30 (Fragment)                               |
| 8086 | dirMS_041712_NAR_30mM_plus.13594.13595.2  | 2 | 11.16 | 0 | 5.45E+05       | (K)KVLQV(K)K V I L L Q I V L V I V I G I S G I R I)      | 124.17 | 456.779  | 912.588  | -0.0002 | -0.2  | 8.72  | 61224.7  | 5.7   | HUMAN | PI0809  | 60 kDa heat shock protein, mitochondrial                           |
| 8087 | dirMS_041712_NAR_30mM_plus.6162.6173.2    | 2 | 11.16 | 0 | 2.28E+05       | (K)JDFITK(K)F I I D/T/T S Y K I F I)                     | 86.52  | 406.2102 | 811.42   | -0.0065 | -8    | 5.84  | 40551.6  | 10.15 | HUMAN | G5E9G0  | 60S ribosomal protein L3                                           |
| 8088 | dirMS_041712_NAR_50mM_plus.13258.13258.3  | 3 | 11.16 | 0 | 3.85E+05       | (K)IVTASL(K)Q I A I S A L A N T F V T J H A E T K I Q I) | 137.68 | 654.0087 | 1960.013 | -0.0019 | -1    | 6.72  | 11802.2  | 5.6   | HUMAN | DR0G03  | Transcription factor BT3 (Fragment)                                |
| 8089 | dirMS_041712_NAR_60mM_plus.11180.11180.3  | 3 | 11.16 | 0 | 2.87E+05       | (K)MDEHS(K)K Q E/H S D Q V I P V G F I P R I S)          | 115.93 | 569.6188 | 1706.828 | -0.0014 | -8.2  | 5.3   | 20991.8  | 10.19 | HUMAN | C918M6  | DNA replication licensing factor MCM7 (Fragment)                   |
| 8090 | dirMS_041712_NAR_60mM_plus.15552.15552.3  | 3 | 11.16 | 0 | 4.48E+05       | (R)YVYVYV(K)K V I P A I V A V I A V I A Q I)             | 139.17 | 544.964  | 1601.823 | -0.0028 | -1.8  | 6.71  | 63174.2  | 6.71  | HUMAN | PI0744  | Glucose-6-phosphate isomerase                                      |
| 8091 | dirMS_041712_NAR_60mM_plus.16005.16005.3  | 3 | 11.16 | 0 | 5.11E+05       | (R)IVWVYV(R)W V I Y S I D D G T H A K T I)               | 140.07 | 534.9464 | 1602.828 | -0.0028 | -1.8  | 6.71  | 63174.2  | 8.64  | HUMAN | PO8744  | Glucose-6-phosphate isomerase                                      |
| 8092 | dirMS_041712_NAR_60mM_plus.6814.6814.2    | 2 | 11.16 | 1 | 2.58E+05       | (K)S L E M(K)S D L/E/M E/K Q D R I E I)                  | 94.13  | 632.3035 | 1263.6   | -0.0001 | -0.4  | 4.68  | 26419.2  | 5.1   | HUMAN | HY9K77  | Splicing factor, proline- and glutamine-rich (Fragment)            |
| 8093 | dirMS_041712_NAR_120mM_plus.8159.8159.3   | 3 | 11.15 | 2 | 1.08E+06       | (K)KGAVAE(K)K G A V I A E D G D E L R T L E V P A I K I) | 99.27  | 638.9836 | 1914.94  | -0.0041 | -2.1  | 4.36  | 19284.3  | 5.23  | HUMAN | G3V3C7  | DNA-(apurinic or apyrimidinic site) lyase (Fragment)               |
| 8094 | dirMS_041712_NAR_120mM_plus.8581.8581.3   | 3 | 11.15 | 1 | 1.40E+05       | (R)ISGDFG(R)S I E I G I S G I S G I R I)                 | 105.11 | 468.8298 | 1465.534 | -0.0007 | -3.4  | 4.5   | 21268    | 6.71  | HUMAN | PT1280A | Protein arginase-N-methyltransferase 1 (Fragment)                  |
| 8095 | dirMS_041712_NAR_120mM_plus.9401.9401.4   | 4 | 11.15 | 2 | 2.08E+05       | (K)KINQGLG(K)K Q G L/E/T/D N K L/V A Q L E V I K V I)    | 105.85 | 484.7536 | 1975.975 | -0.0172 | -8.0  | 4.87  | 23493.8  | 5.45  | HUMAN | F8V1L3  | Myosin-10                                                          |
| 8096 | dirMS_041712_NAR_30mM_plus.7678.7678.2    | 2 | 11.15 | 0 | 3.46E+05 M67m  | (R)QVWYF(R)K Q I V E I T E L K I)                        | 96.17  | 497.2476 | 977.497  | -0.0097 | -4.2  | 4.53  | 12818.9  | 8.18  | HUMAN | K7E174  | 14-3-3 protein epsilon (Fragment)                                  |
| 8097 | dirMS_041712_NAR_50mM_plus.7318.7353.3    | 3 | 11.15 | 1 | 1.43E+05       | (R)IVLVND(R)R L V I N D A A P K G T E/G Q Q E R I I)     | 108.8  | 605.3171 | 1813.94  | -0.0035 | -1.9  | 4.68  | 90316.8  | 5.52  | HUMAN | Q13263  | Transcription intermediary factor 1-beta                           |
| 8098 | dirMS_041712_NAR_60mM_plus.18270.18270.3  | 3 | 11.15 | 0 | 1.37E+05       | (R)ISLEUL(R)S E I L E T I Q L G L E L Q V R I S)         | 163.05 | 538.9724 | 1614.906 | -0.0035 | -2.1  | 4.78  | 533778   | 5.74  | HUMAN | Q15149  | Plectin                                                            |
| 8099 | dirMS_041712_NAR_120mM_plus.14409.14409.4 | 4 | 11.15 | 1 | 4.09E+05       | (K)KIVMSD(K)K V G D Q I H I V I V I G I S G I R I)       | 130.45 | 460.2603 | 1838.013 | -0.0063 | -3.4  | 6.75  | 45508.6  | 5.5   | HUMAN | AK8702  | Heat shock cognate 71 kDa protein                                  |
| 8100 | dirMS_041712_NAR_120mM_plus.15912.15912.4 | 4 | 11.15 | 1 | 8.06E+05       | (K)ITHLPG(K)T H I L P G V F V I Q V A E A L K A I K I)   | 137.05 | 435.4926 | 1738.949 | -0.0001 | -0    | 6.42  | 23314.2  | 9.39  | HUMAN | F3D044  | Peroxisome- $\delta$ , mitochondrial                               |
| 8101 | dirMS_041712_NAR_20mM_plus.11479.11479.2  | 2 | 11.15 | 0 | 2.08E+05       | (K)KVLQV(K)K V G I A V V I A V I K I)                    | 151.53 | 456.7977 | 912.588  | -0.0004 | -0.5  | 8.72  | 61224.7  | 5.7   | HUMAN | PI0809  | 60 kDa heat shock protein, mitochondrial                           |
| 8102 | dirMS_041712_NAR_20mM_plus.16891.16891.2  | 2 | 11.15 | 0 | 3.17E+05       | (K)IVDAAA(K)Q V A I A V I A N Q V I L Q L R I M I)       | 187.73 | 776.9419 | 1525.881 | -0.004  | -2.6  | 5.97  | 10728.1  | 9.15  | HUMAN | Q9Y5L4  | Mitochondrial import inner membrane translocase subunit TIM3       |
| 8103 | dirMS_041712_NAR_20mM_plus.17191.17191.2  | 2 | 11.15 | 0 | 9.02E+05       | (R)YVYVYV(K)K V I P A I V A V I A V I A Q I)             | 200.12 | 589.9927 | 1915.065 | -0.0021 | -2.9  | 5.97  | 20991.8  | 10.19 | HUMAN | C918M6  | DNA replication licensing factor MCM7 (Fragment)                   |
| 8104 | dirMS_041712_NAR_20mM_plus.18597.18597.2  | 2 | 11.15 | 0 | 1.98E+05       | (R)YVYVYV(K)K V I P A I V A V I A V I A Q I)             | 200.12 | 589.9929 | 1316.794 | -0.0014 | -0.9  | 8.72  | 15791.7  | 9.22  | HUMAN | B4D5U6  | Heterogeneous nuclear ribonucleoproteins C1/C2                     |
| 8105 | dirMS_041712_NAR_20mM_plus.18936.18936.2  | 2 | 11.15 | 0 | 1.07E+05       | (K)MSTYLF(K)K D T S Y I V I T G P D V P V K I S)         | 211.92 | 770.9047 | 1554.805 | -0.0025 | -1.6  | 4.21  | 61363    | 8.73  | HUMAN | C91Q59  | Propionyl-CoA carboxylase beta chain, mitochondrial                |
| 8106 | dirMS_041712_NAR_20mM_plus.7283.7283.2    | 2 | 11.15 | 0 | 3.85E+05 M532m | (R)HVPAPG(R)R V I P A I G G A G A L E R I)               | 117.88 | 610.7907 | 1188.586 | -0.1877 | -17.7 | 5.75  | 77999.7  | 9.09  | HUMAN | PS2272  | Heterogeneous nuclear ribonucleoprotein, mitochondrial             |
| 8107 | dirMS_041712_NAR_30mM_plus.16392.16392.2  | 2 | 11.15 | 0 | 2.54E+05       | (K)YFLEED(K)E L P E I A L E R I)                         | 138.87 | 493.2973 | 997.566  | -0.0097 | -19.7 | 4.53  | 96649    | 6.31  | HUMAN | GR0M04  | Programmed cell death 6-interacting protein                        |
| 8108 | dirMS_041712_NAR_30mM_plus.21482.21482.2  | 2 | 11.15 | 0 | 3.90E+05       | (R)YVYVYV(K)K V I P A I V A V I A V I A Q I)             | 166.88 | 751.3976 | 1501.794 | -0.0065 | -4.3  | 9.72  | 23047.2  | 9.95  | HUMAN | PK6782  | 40S ribosomal protein S5                                           |
| 8109 | dirMS_041712_NAR_30mM_plus.5671.5671.2    | 2 | 11.15 | 0 | 6.92E+04       | (R)YJAGGS(R)R A/V G/S G M C/A K I)                       | 83.82  | 472.7087 | 944.396  | -0.0137 | -14.5 | 8.63  | 13520.9  | 11.92 | HUMAN | PA9207  | 60S ribosomal protein L34                                          |
| 8110 | dirMS_041712_NAR_30mM_plus.7598.7599.2    | 2 | 11.15 | 0 | 8.52E+05       | (R)ILTIGCS(R)R T I E I G S V R I R I)                    | 94.1   | 485.2288 | 969.446  | -0.0045 | -4.6  | 6     | 5988.9   | 10.55 | HUMAN | C91C15  | 40S ribosomal protein S27                                          |
| 8111 | dirMS_041712_NAR_30mM_plus.10117.10117.3  | 3 | 11.15 | 0 | 7.48E+05       | (R)ISEEET(R)R I S E I E T T T G T V I N L Y K I M I)     | 120.05 | 550.2759 | 1648.818 | -0.0005 |       |       |          |       |       |         |                                                                    |

|      |                                            |   |      |           |                                                        |        |          |          |         |       |      |          |       |       |          |                                                               |
|------|--------------------------------------------|---|------|-----------|--------------------------------------------------------|--------|----------|----------|---------|-------|------|----------|-------|-------|----------|---------------------------------------------------------------|
| 8171 | dirMS_041712_NAR_30mM_plus2.6449.6449.2    | 2 | 1111 | 0.126E+05 | (K)SGVLSSE(K)S G/V I/V/S E R(L)                        | 87.8   | 449.7152 | 898.247  | -0.0034 | -3.7  | 5.72 | 65692.2  | 5.7   | HUMAN | E7E084   | Ezrin                                                         |
| 8172 | dirMS_041712_NAR_30mM_plus2.7630.7631.2    | 2 | 1111 | 0.416E+05 | (K)IDDDW(K)D I/D V/W/V M T(R)                          | 94.37  | 466.2425 | 931.484  | -0.0066 | -7.1  | 4.21 | 42755    | 7.81  | HUMAN | B7Z274   | T-complex protein 1 subunit delta                             |
| 8173 | dirMS_041712_NAR_30mM_plus2.8154.8155.2    | 2 | 1111 | 0.243E+05 | (K)IVGCVG(K)D V/V M/V N/V S I                          | 93.72  | 462.812  | 930.957  | -0.0034 | -5.7  | 4.21 | 42755    | 7.81  | HUMAN | P94049   | Glyceraldehyde-3-phosphate dehydrogenase                      |
| 8174 | dirMS_041712_NAR_40mM_plus2.18132.18132.2  | 2 | 1111 | 0.861E+04 | (K)I77.07.660.83S(L)D(D)I(S)I A/E V K(A)               | 173.07 | 466.8385 | 1320.671 | -0.0018 | -1.4  | 4.03 | 37296.3  | 5.3   | HUMAN | F8VU64   | Keratin, type II cytoskeletal 8                               |
| 8175 | dirMS_041712_NAR_50mM_plus2.13564.13580.3  | 3 | 1111 | 0.225E+06 | (K)JAGVGVG(K)A/G V/V I/V/G P E/H Q/L V S A E K(A)      | 138.68 | 592.986  | 1776.949 | -0.0056 | -3.1  | 4.75 | 533778   | 5.74  | HUMAN | Q15149   | Plectin                                                       |
| 8176 | dirMS_041712_NAR_50mM_plus2.15207.15376.3  | 3 | 1111 | 1.751E+05 | (K)ITVGVFK(K)I V I G V E/P A A D/G G V V V A E K(A)    | 147.78 | 580.0056 | 1738.011 | -0.0087 | -5    | 5.73 | 7945.1   | 11.03 | HUMAN | C9I850   | 60S ribosomal protein L28                                     |
| 8177 | dirMS_041712_NAR_50mM_plus2.16779.16779.3  | 3 | 1111 | 1.187E+05 | (K)ITLAEK(R)R L I A/E V A V E L D Q/N P F I R(G)       | 155.92 | 510.3238 | 1812.989 | -0.0093 | -4.2  | 4.68 | 23729.5  | 9.95  | HUMAN | C9E217   | Non-PQJ domain-containing octamer-binding protein (Fragment)  |
| 8178 | dirMS_041712_NAR_50mM_plus2.20752.20752.3  | 3 | 1111 | 1.170E+05 | (K)IYVSKFD(R)I V N/V K S F D/T I/V Q/L V L K(R)        | 177.62 | 561.3209 | 1681.952 | -0.0042 | -2.5  | 8.47 | 72626.7  | 9.13  | HUMAN | Q14258   | E3 ubiquitin/SGS15 ligase TRIM25                              |
| 8179 | dirMS_041712_NAR_60mM_plus2.20483.20483.3  | 3 | 1111 | 1.302E+05 | (K)IAQFGE(R)A I/F E G V/V T O L R I(RT)                | 147.7  | 506.6178 | 1517.843 | -0.0046 | -3    | 6.12 | 18505.2  | 10.14 | HUMAN | HY0R66   | Stress-70 protein, mitochondrial                              |
| 8180 | dirMS_041712_NAR_40mM_minus2.12851.12851.3 | 3 | 1111 | 0.466E+05 | (K)ITSDSH(K)P T A/D S H P/H Q/D I/P L V L K(N)         | 159.58 | 574.3124 | 1720.927 | -0.0042 | -2.4  | 5.21 | 138084.9 | 5.52  | HUMAN | Q8BVPE   | Cullin-associated NEDD8-dissociated protein 1                 |
| 8181 | dirMS_041712_NAR_40mM_minus2.10703.10703.3 | 3 | 1111 | 1.325E+05 | (K)INDVAM(K)Q V I/V M/V N/V T V T F D A K R R(L)       | 128.84 | 602.6379 | 1805.896 | -0.0029 | -1.6  | 8.75 | 20069.4  | 6.74  | HUMAN | E1P954   | Heat shock cognate 71 kDa protein (Fragment)                  |
| 8182 | dirMS_041712_NAR_50mM_minus2.13591.13591.1 | 1 | 1111 | 5.314E+05 | (K)H4LTKER(K)T R D K I A V D I/V Q I Q L V R(F)        | 144.2  | 595.991  | 1748.8   | -0.0034 | -1.9  | 4.56 | 90116.6  | 5.74  | HUMAN | Q15149   | Transcription intermediary factor 1-beta                      |
| 8183 | dirMS_041712_NAR_60mM_minus2.11298.11298.3 | 3 | 1111 | 9.28E+05  | M3223m (R)M5MhK(R)M S Y M K E V D/E Q Q I/V N V Q K(N) | 122.78 | 647.3011 | 1923.897 | -0.0015 | -1.8  | 4.68 | 40069.4  | 4.83  | HUMAN | E7EVR1   | Tubulin beta chain                                            |
| 8184 | dirMS_041712_NAR_20mM_plus.15949.15949.2   | 2 | 1111 | 0.138E+05 | (K)ISLVPV(K)S I/L I/V I/P T S A P R(G)                 | 181.2  | 594.3403 | 1187.678 | -0.005  | -4.2  | 9.47 | 92752.5  | 4.76  | HUMAN | P14625   | Endoplasmic                                                   |
| 8185 | dirMS_041712_NAR_20mM_plus.18139.18139.2   | 2 | 1111 | 0.170E+05 | (R)ILTGLQI(R)T I/T G I/Q I/V F/G S I V G(I)            | 107.92 | 666.8962 | 1332.789 | -0.0034 | -2.6  | 8.75 | 45924.5  | 5.29  | HUMAN | B4E1F3   | Selenium-binding protein 1                                    |
| 8186 | dirMS_041712_NAR_20mM_plus.18544.18544.3   | 3 | 1111 | 0.135E+05 | (R)IAVVEE(R)A V I E E G V N/V G G G C A/L R I(R)       | 198.02 | 563.288  | 1488.905 | -0.0022 | -1.3  | 4.53 | 61234.7  | 5.7   | HUMAN | F10089   | 60 kDa heat shock protein, mitochondrial                      |
| 8187 | dirMS_041712_NAR_20mM_plus2.10442.10585.2  | 2 | 1111 | 0.544E+05 | (K)IQCFVF(K)A C I/Q I/V I/F R(N)                       | 106.47 | 447.2386 | 893.466  | -0.0037 | -4.2  | 9.79 | 77999.7  | 9.09  | HUMAN | FS2272   | Heterogeneous nuclear ribonucleoprotein M                     |
| 8188 | dirMS_041712_NAR_30mM_plus2.19604.19604.2  | 2 | 1111 | 0.108E+05 | (K)IIVIAA(K) V Q I/V A/V N A/Q L L A Q I(Q)R(M)        | 155.87 | 776.9425 | 1552.881 | -0.0028 | -1.8  | 5.97 | 107281.1 | 9.15  | HUMAN | Q9YSL4   | Mitochondrial import inner membrane translocase subunit Tim13 |
| 8189 | dirMS_041712_NAR_30mM_plus2.7007.7007.2    | 2 | 1111 | 0.826E+04 | (K)ITTTND(K)I T I I/T M D Q/N R(L)                     | 91.1   | 537.7813 | 1074.554 | -0.0015 | -1.4  | 5.84 | 72445.7  | 5.07  | HUMAN | P11021   | 78 kDa glucose-regulated protein                              |
| 8190 | dirMS_041712_NAR_40mM_plus2.15309.15309.3  | 3 | 1111 | 0.539E+05 | (K)IVFVKS(K)E I/V K P/D G V I D T S F(L)               | 155.93 | 561.9876 | 1628.953 | -0.0045 | -2.7  | 4.56 | 28071.3  | 8.6   | HUMAN | F98117   | Electron transfer flavoprotein subunit beta                   |
| 8191 | dirMS_041712_NAR_40mM_plus2.18650.18650.3  | 3 | 1111 | 3.371E+05 | (R)ITLAEK(R)T L A/E A I/V K/V E L D M P/ L R(G)        | 176.5  | 604.9567 | 1812.989 | -0.0012 | -7.3  | 4.68 | 23729.5  | 9.89  | HUMAN | C9E217   | Non-PQJ domain-containing octamer-binding protein (Fragment)  |
| 8192 | dirMS_041712_NAR_40mM_plus2.19727.19763.3  | 3 | 1111 | 0.368E+05 | (R)ILDLDV(R)I D I/O V T V L P L H N Y I/T K(Y)         | 185.23 | 590.9774 | 1770.927 | -0.0096 | -5.4  | 4.54 | 138084.9 | 5.52  | HUMAN | Q8BVPE   | Cullin-associated NEDD8-dissociated protein 1                 |
| 8193 | dirMS_041712_NAR_50mM_plus2.15339.15339.3  | 3 | 1111 | 1.745E+05 | (K)IFATSL(K)E A I/F S/L F/D K D G/D G T/T T T K(E)     | 149.33 | 615.6408 | 1844.891 | -0.0014 | -0.8  | 4.23 | 21860.1  | 4.45  | HUMAN | E7EVR3   | Calmodulin                                                    |
| 8194 | dirMS_041712_NAR_120mM_plus.13870.13870.4  | 4 | 1109 | 1.626E+06 | (K)IASHEA(K)S A I/H A W T/D D E A/M L R(G)             | 129.97 | 447.476  | 1786.879 | -0.0029 | -1.6  | 5.45 | 80524.2  | 5.05  | HUMAN | D6PKK4   | Alpha actinin 4 short isoform                                 |
| 8195 | dirMS_041712_NAR_20mM_plus.7530.7530.2     | 2 | 1109 | 0.606E+05 | M3235m (K)IVGCVG(K)A G V/V I/V G/V N/V S I             | 123.7  | 731.843  | 1444.689 | -0.0018 | -3.8  | 4.14 | 42069.4  | 4.83  | HUMAN | Q15149   | Tubulin beta chain                                            |
| 8196 | dirMS_041712_NAR_30mM_minus2.18824.18865.2 | 2 | 1109 | 0.161E+05 | (K)IOWPLV(K)S W I/P I/V S T K(N)                       | 157.23 | 532.7918 | 1064.578 | -0.0012 | -1.1  | 8.59 | 46943.7  | 6.54  | HUMAN | O75874   | Isooctate dehydrogenase [NADP] cytoplasmic                    |
| 8197 | dirMS_041712_NAR_40mM_minus2.12769.12769.3 | 3 | 1109 | 0.362E+05 | M460m (R)ISIEEM(R)R S/V E/N E/N T D L E Q L S H L K(Y) | 158.97 | 648.6649 | 1927.979 | -0.0008 | -3    | 4.65 | 80254.2  | 5.05  | HUMAN | D6PKK4   | Alpha actinin 4 short isoform                                 |
| 8198 | dirMS_041712_NAR_20mM_plus.5547.5566.3     | 3 | 1109 | 1.278E+05 | (K)IEAGAP(K)E A/E A/G A/G S/V A G K R(L)               | 87.38  | 447.8959 | 1341.676 | -0.0026 | -1.9  | 4.79 | 54214.9  | 5.66  | HUMAN | C9I813   | Caldesmon (Fragment)                                          |
| 8199 | dirMS_041712_NAR_120mM_plus.17844.17844.3  | 3 | 1109 | 0.730E+05 | (K)IOWPLV(K)S W I/P I/V S T K(N)                       | 146.58 | 544.1261 | 1344.219 | -0.0023 | -1.2  | 5.41 | 58429.2  | 5.61  | HUMAN | Q15149   | Transcription intermediary factor 1-beta                      |
| 8200 | dirMS_041712_NAR_20mM_plus.11353.11353.2   | 2 | 1109 | 0.300E+05 | (K)ITPAVW(K)S I/T P I/V A/V S E R(L)                   | 150.6  | 542.8186 | 1084.636 | -0.0062 | -5.7  | 6    | 13798.9  | 10.17 | HUMAN | P62651   | 40S ribosomal protein S25                                     |
| 8201 | dirMS_041712_NAR_20mM_plus.8111.8111.2     | 2 | 1109 | 0.106E+05 | (K)IVTEDTS(K)I V T I/D T S S V R(S)                    | 116.02 | 553.7889 | 1106.569 | -0.0017 | -1.6  | 4.37 | 80685.1  | 7.31  | HUMAN | P05165   | Propionyl-CoA carboxylase alpha chain, mitochondrial          |
| 8202 | dirMS_041712_NAR_30mM_plus2.11220.11220.2  | 2 | 1109 | 0.473E+05 | (K)ITVSPAL(K)I V S/P A I/D S F R(I)                    | 121.55 | 472.2823 | 943.557  | -0.0022 | -0.2  | 9.41 | 50425    | 5.53  | HUMAN | HY0H47   | Cullin-associated NEDD8-dissociated protein 1 (Fragment)      |
| 8203 | dirMS_041712_NAR_30mM_plus2.16046.16046.2  | 2 | 1109 | 0.160E+05 | (K)IIVIAA(K) V Q I/V A/V N A/Q L L A Q I(Q)R(M)        | 155.87 | 776.9425 | 1552.881 | -0.0028 | -1.8  | 5.97 | 107281.1 | 9.15  | HUMAN | Q9YSL4   | Mitochondrial import inner membrane translocase subunit Tim13 |
| 8204 | dirMS_041712_NAR_30mM_plus2.22665.22665.3  | 3 | 1109 | 0.500E+05 | (R)IALTVPE(R)A L T/W P E L T/Q Q/V D F A/K(N)          | 175.77 | 553.9697 | 1659.895 | -0.0007 | -0.4  | 4.37 | 40069.4  | 4.83  | HUMAN | E7EVR1   | Tubulin beta chain                                            |
| 8205 | dirMS_041712_NAR_30mM_plus2.8538.8538.2    | 2 | 1109 | 0.893E+05 | (R)IJLGGEE(R)I L G/G A/E E K(S)                        | 98.92  | 501.7639 | 1002.51  | -0.0103 | -10.3 | 4.25 | 40968.6  | 9.24  | HUMAN | C9I969   | Regulator of chromosome condensation (Fragment)               |
| 8206 | dirMS_041712_NAR_50mM_plus2.10380.10380.3  | 3 | 1109 | 0.139E+05 | (R)IJLHAGG(R)I L A/H A/G S/V T N L A I Q(K)            | 122    | 436.9248 | 1308.763 | -0.0036 | -2.7  | 8.76 | 24485.6  | 9.74  | HUMAN | HY0553   | Nucleolin protein 56 (Fragment)                               |
| 8207 | dirMS_041712_NAR_50mM_plus2.15118.15118.3  | 3 | 1109 | 0.861E+05 | (K)IHVEVG(K)H V/E V I/V G/V I/P T S A P R(G)           | 147.2  | 649.0210 | 1945.054 | -0.0039 | -2.2  | 6.75 | 19379.8  | 5.48  | HUMAN | Q06010   | Claflarin heavy chain 1                                       |
| 8208 | dirMS_041712_NAR_50mM_plus2.20171.20171.3  | 3 | 1109 | 0.536E+05 | (R)IQWSPY(R)Q A/R P T/V A/V T A/V I Q S L V L K(Y)     | 174.55 | 597.9662 | 1791.979 | -0.0045 | -2.5  | 9.9  | 15002.8  | 9.1   | HUMAN | F7WZ0    | Unconventional myosin-VI                                      |
| 8209 | dirMS_041712_NAR_50mM_plus2.7777.7779.3    | 3 | 1109 | 1.102E+05 | (K)IELQAG(K)E L D I/A G A/K S/P E/L E R(L)             | 106.55 | 514.9321 | 1542.776 | -0.0059 | -3.8  | 4.41 | 63374.2  | 8.64  | HUMAN | P06744   | Glucose-6-phosphate isomerase                                 |
| 8210 | dirMS_041712_NAR_60mM_plus.15442.15442.3   | 3 | 1109 | 1.377E+05 | (R)ISILIAN(R)S I/L I/V A/L A/A N A E K(K)              | 137.45 | 512.9411 | 1536.82  | -0.0115 | -7.5  | 9.7  | 36798.6  | 6.33  | HUMAN | B72800   | Adenosine kinase                                              |
| 8211 | dirMS_041712_NAR_60mM_plus.15915.15915.3   | 3 | 1109 | 1.252E+05 | (R)ITPSLD(R)S T/L D/V L/D S F R(I)                     | 139.92 | 400.5399 | 1199.605 | -0.0004 | -0.3  | 5.62 | 21195.7  | 6.67  | HUMAN | HY0K21   | Cytoskeletal dynein 1 heavy chain 1 (Fragment)                |
| 8212 | dirMS_041712_NAR_120mM_plus.19484.19484.3  | 3 | 1109 | 1.107E+05 | (K)IVGCVG(K)A G V/V I/V G/V N/V S I                    | 123.7  | 731.843  | 1444.689 | -0.0018 | -3.8  | 4.54 | 138084.9 | 5.52  | HUMAN | Q8BVPE   | Cullin-associated NEDD8-dissociated protein 1 (Fragment)      |
| 8213 | dirMS_041712_NAR_20mM_plus.11058.11058.2   | 2 | 1108 | 0.131E+05 | M922m (R)IWHNTS(R)S V/V V/P S R(K)                     | 158.32 | 668.3513 | 1319.703 | -0.0025 | -1.8  | 8.75 | 42831.5  | 4.86  | HUMAN | AK051384 | Clyf1983504, isoform CRA_f                                    |
| 8214 | dirMS_041712_NAR_30mM_minus2.13855.14021.2 | 2 | 1108 | 0.387E+05 | (R)IAGLGF(R)I A/G I/L I/F N E D(K)                     | 121.03 | 524.2789 | 1047.558 | -0.0076 | -7.3  | 6    | 13098.1  | 7.83  | HUMAN | B72909   | Hypoxia up-regulated protein 1                                |
| 8215 | dirMS_041712_NAR_50mM_plus2.14736.14878.3  | 3 | 1108 | 1.305E+05 | (R)IEAVTEL(R)E A I/V T E/V L P R E/D R E K(G)          | 125.22 | 568.9883 | 1698.891 | -0.0005 | -0.3  | 4.25 | 25685.9  | 6.4   | HUMAN | E9P071   | Translin                                                      |
| 8216 | dirMS_041712_NAR_50mM_minus2.18991.18991.3 | 3 | 1108 | 1.552E+05 | (R)IGDGLI(R)G G V/V I/P P A/D S F R(I)                 | 127.1  | 610.0112 | 1528.022 | -0.0042 | -1.3  | 4.68 | 18466.1  | 5.78  | HUMAN | HY05U3   | Pyruvate kinase (Fragment)                                    |
| 8217 | dirMS_041712_NAR_50mM_minus2.8642.8738.3   | 3 | 1108 | 1.959E+04 | (K)IALDLS(K)S L D I/L D/S V S C K E A A D G V Q I(R)   | 117    | 633.6221 | 1898.855 | -0.0011 | -1.7  | 4.23 | 60404.6  | 6.4   | HUMAN | F5H071   | Stress-induced-60kDa protein 1                                |
| 8218 | dirMS_041712_NAR_60mM_minus2.11068.11132.3 | 3 | 1108 | 1.126E+05 | (R)IURSLVE(R)R L/R S I/V H R G(S)                      | 121.03 | 517.5881 | 1250.733 | -0.0017 | -13.6 | 9.61 | 83058.5  | 9.6   | HUMAN | F5H141   | Zinc finger protein 607                                       |
| 8219 | dirMS_041712_NAR_60mM_minus2.17109.17109.3 | 3 | 1108 | 0.114E+04 | M365m (R)IVLVSFK(R)R V/L G F S/H E I S I M L R(K)      | 155.37 | 549.6245 | 1630.862 | -0.0098 | -1.1  | 5.4  | 23239.1  | 5.52  | HUMAN | F222U8   | Myosin-14                                                     |
| 8220 | dirMS_041712_NAR_60mM_minus2.19736.19736.3 | 3 | 1108 | 0.458E+06 | (R)IHLHFM(R)H F F M/P G I/F A/P I/L T S R(S)           | 179.23 | 548.9891 | 1620.835 | -0.0029 | -1.7  | 9.75 | 42320.8  | 4.77  | HUMAN | AK0628   | Putative tubulin beta chain-like protein ENSP0000290377       |
| 8221 | dirMS_041712_NAR_30mM_plus.15554.15554.2   | 2 | 1108 | 1.193E+04 | (R)IWHNTS(R)S V/V V/P S R(K)                           | 158.32 | 668.3513 | 1319.703 | -0.0025 | -1.8  | 8.75 | 42831.5  | 4.86  | HUMAN | AK051384 | Clyf1983504, isoform CRA_f                                    |
| 8222 | dirMS_041712_NAR_20mM_plus.17669.17669.2   |   |      |           |                                                        |        |          |          |         |       |      |          |       |       |          |                                                               |



|      |                                          |   |       |                 |                                               |        |          |           |         |       |      |          |       |       |        |                                                                    |
|------|------------------------------------------|---|-------|-----------------|-----------------------------------------------|--------|----------|-----------|---------|-------|------|----------|-------|-------|--------|--------------------------------------------------------------------|
| 8280 | drMS_041712_NAR_50mM_minus13572.13572.3  | 3 | 11.05 | 0.459E+04       | (KIMLDAE)(K)M(L)DA(E/D)/V N/T A/R/P D E K(A)  | 144.98 | 606.2965 | 1816.875  | 0.0004  | 0.2   | 4.1  | 105308.6 | 5.27  | HUMAN | O43707 | Alpha-actinin-4                                                    |
| 8281 | drMS_041712_NAR_50mM_minus15948.15948.3  | 3 | 11.05 | 0.352E+05       | (KIKYVQ)(K)I/LV(GP'N)F(S)/A(H)N(V A/R)R       | 158.25 | 500.3221 | 1798.96   | -0.0081 | -4.5  | 8.75 | 60985.3  | 5.56  | HUMAN | O75131 | Copine-3                                                           |
| 8282 | drMS_041712_NAR_50mM_minus1906.1906.3    | 3 | 11.05 | 1.134E+05       | (RISVGG)(K)I/V(L)G(S)P(V)P(V)A(L)A(D)V T(R)R  | 140.43 | 632.8304 | 1264.653  | 0.0003  | 0.3   | 5.95 | 33029.4  | 6.62  | HUMAN | AN0536 | Protein disulfine-2, isoform CRA_a                                 |
| 8283 | drMS_041712_NAR_120mM_plus15874.15874.4  | 4 | 11.05 | 2.762E+05       | (KIKYVQ)(K)I/V(L)G(S)P(V)P(V)A(L)A(D)V T(R)R  | 135.98 | 467.823  | 1866.106  | -0.0145 | -4.78 | 8.5  | 7945.1   | 11.03 | HUMAN | CN1850 | 60S ribosomal protein L2, isoform CRA_a                            |
| 8284 | drMS_041712_NAR_20mM_plus15854.15854.2   | 2 | 11.05 | 0.604E+05 M73m  | (RJAIVLDR)(R)A(L)U(V)D(L)E(I)G(Y)Tm D S V(R)S | 179.72 | 816.4181 | 1615.826  | 15.9929 | -1.2  | 4.03 | 27549.9  | 4.39  | HUMAN | EP9814 | Tubulin beta chain                                                 |
| 8285 | drMS_041712_NAR_30mM_plus15984.15984.2   | 2 | 11.05 | 0.468E+05       | (RIMGPNV)(R)M(G)P(P)N(V)E/V(R)T               | 136.68 | 546.784  | 1092.551  | 0.0109  | 1.0   | 5.75 | 8641.9   | 9.77  | HUMAN | C9I0V8 | Protein NsgSnap homolog 1 (Fragment)                               |
| 8286 | drMS_041712_NAR_20mM_plus16682.16682.2   | 2 | 11.05 | 0.439E+05       | (RILWDLT)(R)W(L)D(L)T77(G)T T(R)R             | 144.43 | 632.8304 | 1264.653  | 0.0003  | 0.3   | 5.95 | 33029.4  | 6.62  | HUMAN | O68636 | Guanine nucleotide-binding protein subunit beta2-like 1 (Fragment) |
| 8287 | drMS_041712_NAR_30mM_plus15946.15946.3   | 3 | 11.05 | 0.245E+05       | (RIPSGMFR)(R)I(L)G(F)M(C)Q(G)D(F)T(R)H        | 151.77 | 533.5865 | 1598.745  | -0.0004 | -0.4  | 5.84 | 13378.8  | 6.27  | HUMAN | C19527 | Peptidyl-prolyl cis-trans isomerase                                |
| 8288 | drMS_041712_NAR_30mM_plus2.20268.2026.2  | 2 | 11.05 | 0.395E+05       | (RFLJUNR)(R)F(L)W(Q)V(L)R(L)                  | 167.17 | 501.8112 | 1002.61   | 0.0056  | 5.6   | 9.75 | 132902.3 | 5.82  | HUMAN | J3K224 | Isoleucine-tRNA ligase, cytoplasmic                                |
| 8289 | drMS_041712_NAR_40mM_plus11930.11930.3   | 3 | 11.05 | 0.759E+04 M26m  | (RILSMN)(R)S(L)M(L)N(V)P(V)T(V)K(P)K(R)       | 136.4  | 542.3146 | 1608.939  | 15.9899 | -3.1  | 8.59 | 31524.1  | 4.51  | HUMAN | PR8270 | High mobility group nucleosome-binding domain-containing protein 5 |
| 8290 | drMS_041712_NAR_40mM_plus18087.18087.3   | 3 | 11.05 | 0.139E+05       | (RILVGGN)(K)I/V(L)G(S)P(V)P(V)A(L)A(D)V T(R)R | 172.83 | 513.3081 | 1571.9001 | -0.0003 | -0.2  | 8.76 | 253486.5 | 5.51  | HUMAN | J3K166 | Protein transport protein Sec16A                                   |
| 8291 | drMS_041712_NAR_50mM_plus18741.18741.3   | 3 | 11.05 | 0.792E+05       | (RIRGQDR)(R)P(L)G(V)P(V)P(V)A(L)A(D)V T(R)R   | 167.17 | 501.8112 | 1002.61   | 0.0056  | 5.6   | 9.75 | 132902.3 | 5.82  | HUMAN | C15149 | Bcl-2                                                              |
| 8292 | drMS_041712_NAR_50mM_plus8273.8273.3     | 3 | 11.05 | 1.795E+04       | (RITDTEK)(R)D(T)G(E)K(L)T(V)E/A(E)K(E)K       | 105.98 | 578.9478 | 1734.839  | -0.0104 | -6    | 4.25 | 127185.3 | 7.06  | HUMAN | PO7814 | Bifunctional glutamate/praline-tRNA ligase                         |
| 8293 | drMS_041712_NAR_120mM_minus11433.11466.4 | 4 | 11.04 | 2.139E+06 M105m | (RJAQDKE)(R)A(Q)K(D)E(E)K(M)E(V)D(L)A(Q)K(E)  | 116.63 | 494.7536 | 1960.006  | 15.987  | -4    | 4.58 | 31923.6  | 4.85  | HUMAN | B72596 | Tropomyosin alpha-1 chain                                          |
| 8294 | drMS_041712_NAR_120mM_minus17143.17143.4 | 4 | 11.04 | 1.517E+05       | (KYYTIDH)(K)Y(Y)V(T)I(D)A(G)H R D F(V)K(R)    | 147.97 | 477.5756 | 1908.001  | -0.0008 | -0.4  | 6.75 | 12137.8  | 9.3   | HUMAN | ADP0V8 | Elongation factor 1-alpha 1 (Fragment)                             |
| 8295 | drMS_041712_NAR_120mM_minus4851.4853.3   | 3 | 11.04 | 1.563E+05       | (KQAQDE)(K)A(Q)K(D)E(E)K(M)E(V)D(L)A(Q)K(E)   | 77.42  | 422.8614 | 1275.592  | -0.0008 | -0.7  | 4.1  | 57204.9  | 6.01  | HUMAN | FSQW6F | T-complex protein 1 subunit beta                                   |
| 8296 | drMS_041712_NAR_30mM_minus15743.15743.2  | 2 | 11.04 | 0.658E+04       | (RINLSLMS)(R)N(I)N(E)I(S)N(L)A(K)R            | 139.15 | 557.8242 | 1114.647  | -0.0005 | -5    | 6    | 77999.7  | 9.09  | HUMAN | PS2272 | Heterogeneous nuclear ribonucleoprotein M                          |
| 8297 | drMS_041712_NAR_40mM_minus12798.12798.3  | 3 | 11.04 | 0.129E+05       | (KGVYTGK)(K)G(V)T(V)G(P)A(T)V(G)G(K)P(G)C(F)K | 159.23 | 624.6828 | 1872.041  | -0.0073 | -3.9  | 1.0  | 91839.6  | 9.22  | HUMAN | BAE3P0 | ATP-citrate lyase                                                  |
| 8298 | drMS_041712_NAR_30mM_plus12748.12748.3   | 3 | 11.04 | 0.341E+06 M84m  | (KYPPEHG)(K)Y(P)P(V)E(I)N(T)N(D)D(M)E(K)I     | 141.47 | 659.6398 | 1960.911  | 15.9939 | -0.5  | 4.31 | 32616.5  | 5.18  | HUMAN | AN6176 | Actin, alpha skeletal muscle                                       |
| 8299 | drMS_041712_NAR_60mM_minus10361.10361.3  | 3 | 11.04 | 1.329E+04 M88m  | (KIDVQEK)(K)D(V)E(D)A(Y)M(N)K(V)E(L)S(R)R     | 116.62 | 605.2791 | 1797.832  | 15.9904 | -2.5  | 4.18 | 13588.1  | 4.66  | HUMAN | FRV957 | Keratin, type II cytoskeletal 8 (Fragment)                         |
| 8300 | drMS_041712_NAR_60mM_minus10789.10789.3  | 3 | 11.04 | 1.544E+05 M233m | (RIMXMS)(R)M(K)E(M)K(D)E(Q)K(L)N(V)Q(N)K(M)   | 119.9  | 647.3011 | 1923.897  | 15.9915 | -1.8  | 4.68 | 40069.4  | 4.83  | HUMAN | FEW0R1 | Tubulin beta chain                                                 |
| 8301 | drMS_041712_NAR_120mM_plus16321.16324.4  | 4 | 11.04 | 1.926E+05       | (RJALEHT)(R)A(L)E(H)T(F)D(L)R(K)A             | 138.4  | 405.9647 | 1620.838  | -0.0011 | -0.7  | 5.38 | 193379.8 | 5.48  | HUMAN | O06010 | Claflarin heavy chain 1                                            |
| 8302 | drMS_041712_NAR_120mM_plus18767.18767.4  | 4 | 11.04 | 0.377E+05       | (RHLJLAD)(R)H(L)Q(A)P(P)D(Q)A(Q)E(L)S(V)R(F)  | 146.78 | 486.2589 | 1942.014  | -0.002  | -0.2  | 5.21 | 61613.4  | 7.99  | HUMAN | B3K01C | Protein transport protein Sec23A                                   |
| 8303 | drMS_041712_NAR_20mM_minus15869.15869.3  | 3 | 11.04 | 0.334E+04 M73m  | (RILVQDR)(R)A(L)D(V)E(I)P(G)M(D)S(V)R(S)      | 180.95 | 544.6139 | 1615.836  | 15.9912 | -2.3  | 4.03 | 27549.9  | 4.39  | HUMAN | EP9814 | Tubulin beta chain                                                 |
| 8304 | drMS_041712_NAR_20mM_plus19771.1977.2    | 2 | 11.04 | 1.93E+05        | (RISGDE)(K)A(Q)K(D)E(E)K(M)E(V)D(L)A(Q)K(E)   | 155.13 | 890.4414 | 1779.876  | -0.0004 | -0.2  | 4.14 | 30947.9  | 6.47  | HUMAN | FSQW6F | T-complex protein 1 subunit beta                                   |
| 8305 | drMS_041712_NAR_30mM_plus4251.4251.2     | 2 | 11.04 | 0.199E+05 M299m | (KJNMNM)(K)M(N)M(A)C(D)P(R)H                  | 69.88  | 549.2125 | 1065.427  | 13.9903 | 0.4   | 5.84 | 50199.4  | 4.75  | HUMAN | AN6N22 | Tubulin beta-8 chain-like protein LOC260334                        |
| 8306 | drMS_041712_NAR_30mM_plus2809.8809.2     | 2 | 11.04 | 0.699E+05       | (RJAAPGAE)(R)A(P)A(E)F(A)P(N)K(R)             | 100.33 | 536.7755 | 1072.542  | 0.0051  | 1.4   | 6.05 | 43979.5  | 8.02  | HUMAN | FSV023 | Non-POU domain-containing octamer-binding protein                  |
| 8307 | drMS_041712_NAR_40mM_plus18011.18011.3   | 3 | 11.04 | 0.278E+05       | (KHLVQDK)(R)H(L)D(V)D(L)A(Q)H(A)A(V)G(S)A(R)  | 171.4  | 404.9967 | 1813.916  | 0.0153  | 8.4   | 5.21 | 24733.5  | 8.88  | HUMAN | HDY449 | Electron transfer flavoprotein subunit alpha, mitochondrial        |
| 8308 | drMS_041712_NAR_40mM_plus26958.26958.2   | 2 | 11.04 | 0.141E+06       | (KILVGGN)(K)I/V(L)G(S)P(V)P(V)A(L)A(D)V T(R)R | 172.83 | 513.3081 | 1571.9001 | -0.0003 | -0.2  | 8.76 | 253486.5 | 5.51  | HUMAN | J3K166 | Protein transport protein Sec16A                                   |
| 8309 | drMS_041712_NAR_50mM_plus20001.20001.3   | 3 | 11.04 | 1.108E+05       | (KISVYSG)(K)S(V)S(I)S(G)G(L)D(A)E(L)F(G)K(T)K | 174.18 | 545.3006 | 1832.916  | -0.0017 | -1    | 5.79 | 22327.5  | 4.82  | HUMAN | ERS6F9 | Protein FAM114A2 (Fragment)                                        |
| 8310 | drMS_041712_NAR_50mM_plus27834.7834.3    | 3 | 11.04 | 1.695E+04 M227m | (R)M(Q)K(E)T(R)M(Q)K(E)I(T)A(L)S(P)S(T)M(K)I  | 106.93 | 527.6045 | 1548.812  | 13.9865 | -2.1  | 8.33 | 32616.5  | 5.18  | HUMAN | AN6L76 | Actin, alpha skeletal muscle                                       |
| 8311 | drMS_041712_NAR_30mM_plus9769.9769.3     | 3 | 11.04 | 1.290E+05       | (KISELQEK)(K)S(E)I(Q)K(E)E(G)E(I)P(V)R(T)     | 109.28 | 527.9264 | 1581.764  | 0.0004  | 0.2   | 4.32 | 43928.7  | 6.58  | HUMAN | BA0HG0 | Dihydrolytic dehydrogenase, mitochondrial                          |
| 8312 | drMS_041712_NAR_30mM_minus09468.9468.2   | 2 | 11.03 | 1.101E+05       | (KISLRGK)(K)I/V(L)G(S)P(V)P(V)A(L)A(D)V T(R)R | 142.45 | 505.7282 | 1604.453  | -0.0021 | -2.1  | 6.01 | 33029.4  | 6.62  | HUMAN | HDY144 | Sulfite dehydrogenase                                              |
| 8313 | drMS_041712_NAR_120mM_minus8191.8191.3   | 3 | 11.03 | 1.276E+04       | (KISSGDRG)(K)S(G)S(G)R(D)LL(E)S(G)Q(L)R(R)    | 98.8   | 526.5882 | 1577.751  | -0.0014 | -0.9  | 4.68 | 11625.5  | 8.01  | HUMAN | BRZ777 | Haematological and neurological-expressed 1 protein                |
| 8314 | drMS_041712_NAR_20mM_minus10408.10408.2  | 2 | 11.03 | 0.515E+04       | (KJLIANN)(K)I(L)IA(N)G(G)IA(A)M(K)            | 152.82 | 591.863  | 1182.72   | -0.0018 | -1.5  | 8.72 | 269899.9 | 5.92  | HUMAN | FBW8T8 | Acetyl-CoA carboxylase 2                                           |
| 8315 | drMS_041712_NAR_30mM_minus16894.16894.2  | 2 | 11.03 | 0.471E+05       | (KINSLESY)(K)N(S)LE(S)Y(A)F(N)M(K)A           | 146.67 | 652.3031 | 1301.599  | 0.0002  | 0.2   | 6    | 45508.6  | 5.5   | HUMAN | AKR702 | Heat shock cognate 71 kDa protein                                  |
| 8316 | drMS_041712_NAR_30mM_plus12481.12481.3   | 3 | 11.03 | 1.332E+05       | (KILYEQDK)(K)Y(L)E(Q)A(E)K(L)K(A)             | 139.52 | 530.9592 | 1590.874  | -0.0107 | -6.7  | 4.79 | 20406.7  | 5.88  | HUMAN | HDY0M2 | Protein phosphatase 1 regulatory subunit 12A (Fragment)            |
| 8317 | drMS_041712_NAR_50mM_plus18398.18398.3   | 3 | 11.03 | 0.339E+05       | (KIALESPE)(K)I(L)P(T)S(E)F(G)K(A)K(V)         | 175.03 | 530.556  | 1768.996  | -0.0023 | -1.9  | 6.19 | 41827.5  | 7.08  | HUMAN | B72Z48 | Phosphoglycerate kinase                                            |
| 8318 | drMS_041712_NAR_120mM_plus22434.2434.4   | 4 | 11.03 | 2.340E+05       | (RITKOPSR)(R)K(D)P(S)A(L)Q(V)K(L)D(V)R(S)     | 147.28 | 482.0309 | 1925.107  | -0.0048 | -2.5  | 5.79 | 23331.4  | 11.18 | HUMAN | C9J1U7 | Protein FAM207A (Fragment)                                         |
| 8319 | drMS_041712_NAR_20mM_plus10257.10257.2   | 2 | 11.03 | 0.956E+04       | (KILEAEAT)(K)E(A)E(A)T(Y)R                    | 171.43 | 533.2797 | 1065.557  | -0.0054 | -5    | 4.53 | 43773.3  | 5.26  | HUMAN | FBV2Y9 | Keratin, type I cytoskeletal 18                                    |
| 8320 | drMS_041712_NAR_20mM_plus11071.11072.2   | 2 | 11.03 | 0.258E+03       | (RITAMAA)(R)T(A)A(A)I(P)A(S)L(T)S(A)R(M)      | 148.3  | 650.862  | 1300.722  | -0.0052 | -4    | 9.41 | 30051.7  | 12.11 | HUMAN | QD1935 | Serine/arginine repetitive matrix protein 2                        |
| 8321 | drMS_041712_NAR_20mM_plus13836.13836.3   | 3 | 11.03 | 0.385E+05       | (RISAGAN)(R)S(A)G(A)N(L)D(V)S(E)R(K)A         | 107.25 | 617.81   | 1411.217  | 0.0017  | 0.8   | 4.75 | 1714.4   | 6.71  | HUMAN | CT1543 | Adenosine 3'-phosphate dehydrogenase                               |
| 8322 | drMS_041712_NAR_20mM_plus17115.17115.2   | 2 | 11.03 | 0.122E+05       | (RISAGAN)(R)S(A)G(A)N(L)D(V)S(E)R(K)A         | 107.25 | 617.81   | 1411.217  | 0.0017  | 0.8   | 4.75 | 1714.4   | 6.71  | HUMAN | CT1543 | Adenosine 3'-phosphate dehydrogenase                               |
| 8323 | drMS_041712_NAR_20mM_plus17870.17877.2   | 2 | 11.03 | 0.196E+05       | (RISLVPAAR)(R)S(L)I(V)P(A)E(L)E(L)S(V)R       | 194.82 | 643.8163 | 1284.716  | -0.0005 | -0.4  | 5.43 | 33378.8  | 5.74  | HUMAN | Q15149 | Plectin                                                            |
| 8324 | drMS_041712_NAR_30mM_plus12004.12004.2   | 2 | 11.03 | 0.112E+05       | (KIFTFQEK)(K)F(I)T(F)Q(G)G(N)S                | 116    | 518.2927 | 1035.583  | -0.0052 | -4.5  | 8.41 | 22338.2  | 9.61  | HUMAN | C9I0T8 | AP-2 complex subunit mu (Fragment)                                 |
| 8325 | drMS_041712_NAR_30mM_plus12722.12680.2   | 2 | 11.03 | 0.294E+05       | (RILVQDR)(R)A(L)D(V)E(I)P(G)M(D)S(V)R(S)      | 140.47 | 532.8304 | 1264.653  | 0.0003  | 0.3   | 5.84 | 33029.4  | 6.62  | HUMAN | O68636 | Guanine nucleotide-binding protein subunit beta2-like 1 (Fragment) |
| 8326 | drMS_041712_NAR_30mM_plus19070.19070.2   | 2 | 11.03 | 0.247E+05       | (RISLRS)(R)S(L)W(S)A(T)F(T)R                  | 152.93 | 484.2579 | 967.5     | 0.0089  | 9.2   | 9.47 | 53377.8  | 5.74  | HUMAN | Q15149 | Plectin                                                            |
| 8327 | drMS_041712_NAR_30mM_plus4142.4240.2     | 2 | 11.03 | 1.400E+06 M299m | (KJNMNM)(K)M(N)M(A)C(D)P(R)H                  | 69.88  | 549.2125 | 1065.427  | 13.9903 | 0.4   | 5.84 | 50199.4  | 4.75  | HUMAN | AN6N22 | Tubulin beta-8 chain-like protein LOC260334                        |
| 8328 | drMS_041712_NAR_40mM_plus27035.7056.2    | 2 | 11.03 | 0.161E+05       | (RILQLETK)(R)H(L)E(I)T(G)Q(E)K(L)             | 101.52 | 523.282  | 1045.552  | 0.0043  | 4.1   | 4.53 | 13588.1  | 4.66  | HUMAN | FRV957 | Keratin, type II cytoskeletal 8 (Fragment)                         |
| 8329 | drMS_041712_NAR_50mM_plus11214.11214.3   | 3 | 11.03 | 1.413E+05       | (RIMJFQEK)(R)M(L)F(K)D(P)P(V)K(I)K            | 127.05 | 508.9188 | 1524.74   | 0.0016  | 1     | 5.71 | 20685.4  | 4.98  | HUMAN | BDQY07 | SUMO-conjugating enzyme UBC9                                       |
| 8330 | drMS_041712_NAR_50mM_plus11400.11400.3   | 3 |       |                 |                                               |        |          |           |         |       |      |          |       |       |        |                                                                    |







|      |                                           |   |       |                 |                                             |          |          |          |         |      |          |          |       |        |                                 |                                                                          |
|------|-------------------------------------------|---|-------|-----------------|---------------------------------------------|----------|----------|----------|---------|------|----------|----------|-------|--------|---------------------------------|--------------------------------------------------------------------------|
| 8716 | dirMS_041712_NAR_20mM_plus.10963.10963.2  | 2 | 10.81 | 0.380E+04       | (K)IGGIGT(K)G/G/G/T/V/P/V R(V)              | 148.1    | 513.3057 | 1025.61  | -0.0061 | -5.9 | 9.75     | 50482.3  | 9.31  | HUMAN  | P68104                          | Elongation factor 1-alpha 1                                              |
| 8717 | dirMS_041712_NAR_20mM_plus.12660.12660.2  | 2 | 10.81 | 0.934E+04       | (R)LAVAL(R)A/V/D/S/L/V/R(T)                 | 160.48   | 495.7739 | 870.541  | -0.0002 | -0.2 | 6        | 6558.6   | 9.87  | HUMAN  | G3V157                          | Hyalaronan synthase 1                                                    |
| 8718 | dirMS_041712_NAR_30mM_plus.12501.12501.2  | 2 | 10.81 | 0.453E+05       | (R)GGD(R)G/V/G/V/E/D/S/M R(N)               | 118.1    | 579.1951 | 1151.13  | 0.0011  | 1.1  | 4.53E+05 | 9.39     | 10.1  | HUMAN  | G3V157                          | Keratin, type I cytoskeletal 9                                           |
| 8719 | dirMS_041712_NAR_30mM_plus.16927.16947.3  | 3 | 10.81 | 0.502E+05 M313m | 142.12                                      | 508.2535 | 1507.747 | 15.9991  | 2.8     | 4.03 | 43773.3  | 5.26     | HUMAN | F8V219 | Keratin, type I cytoskeletal 18 |                                                                          |
| 8720 | dirMS_041712_NAR_30mM_plus.16979.16979.2  | 2 | 10.81 | 0.326E+05       | (K)SNQQ(L)K(S)N/Q/L/V/D/I/E(K)V             | 141.33   | 643.8504 | 1286.695 | -0.0015 | -1.2 | 4.37     | 22568.6  | 6.35  | HUMAN  | BK3Q25                          | Protasome activator complex subunit 3                                    |
| 8721 | dirMS_041712_NAR_30mM_plus.18826.18826.2  | 2 | 10.81 | 0.153E+05       | (K)FGRVY(K)G/G/V/A/V/L/V/D/L(E)K            | 152.32   | 555.8011 | 1110.594 | 0.0007  | 0.6  | 5.83     | 269989.9 | 5.92  | HUMAN  | FBW8TB                          | Acetyl-CoA carboxylase 2                                                 |
| 8722 | dirMS_041712_NAR_30mM_plus.2111.7986.2    | 2 | 10.81 | 0.172E+06       | (R)GQVY(R)G/L/V/I/P/T/R(N)                  | 92.9     | 425.7397 | 850.473  | -0.0006 | -3.1 | 8.79     | 13796.3  | 10.17 | HUMAN  | P92851                          | 40S ribosomal protein S25                                                |
| 8723 | dirMS_041712_NAR_50mM_plus.9359.935.3     | 3 | 10.81 | 0.291E+05       | (K)GLSSDN(K)K/L/S/D/S/D/K/P/M/W/L/D(K)S     | 116.17   | 506.5528 | 1517.763 | 0.001   | 0.7  | 5.96     | 24161.9  | 5.27  | HUMAN  | F8V209                          | SAP domain-containing ribonucleoprotein                                  |
| 8724 | dirMS_041712_NAR_60mM_plus.11919.11952.3  | 3 | 10.81 | 0.936E+05       | (R)ALPES(R)A/L/P/E/L/S/L/D/L/V/D/L(E)K      | 119.38   | 431.2397 | 1291.712 | -0.0072 | -5.5 | 6.79     | 31463.6  | 5.53  | HUMAN  | O94760                          | N(G),N(G)-dimethylarginine dimethylaminohydrolase 1                      |
| 8725 | dirMS_041712_NAR_60mM_plus.13740.13740.3  | 3 | 10.81 | 1.888E+05       | (K)SLKVR(K)K/S/L/E/K/A/D/L/V/R(G)           | 128.38   | 435.2389 | 1303.704 | -0.0017 | -1.1 | 5.79     | 6885.1   | 10.56 | HUMAN  | ESR2K                           | 40S ribosomal protein S20                                                |
| 8726 | dirMS_041712_NAR_60mM_plus.17841.17841.3  | 3 | 10.81 | 1.190E+05       | (K)ILKPV(K)K/L/E/V/S/L/D/V/V/P/R(A)         | 150.6    | 478.9419 | 1434.814 | -0.0026 | -1.8 | 8.75     | 77799.7  | 9.09  | HUMAN  | PS2272                          | Heterogeneous nuclear ribonucleoprotein M                                |
| 8727 | dirMS_041712_NAR_60mM_plus.8484.8713.3    | 3 | 10.81 | 1.156E+05       | (R)KMSAE(K)M/S/L/S/D/V/E/S/K(V)K            | 101.4    | 449.2441 | 1345.711 | 0.0027  | 4.1  | 8.35     | 32746.6  | 4.84  | HUMAN  | P61748                          | Nucleophosmin                                                            |
| 8728 | dirMS_041712_NAR_120mM_minus.7595.7595.3  | 3 | 10.81 | 1.188E+05 M42m  | (R)SRNTE(R)R/S/R/N/T/D/E/V/N/L(E)R(R)       | 95.92    | 455.8866 | 1349.648 | 15.9975 | 1.9  | 4.68     | 51260.6  | 5.39  | HUMAN  | PE1978                          | Heterogeneous nuclear ribonucleoprotein C                                |
| 8729 | dirMS_041712_NAR_30mM_minus.12094.12617.2 | 2 | 10.81 | 0.520E+05       | (K)DLSLSDY(K)D/I/S/L/S/D/Y/N(K)             | 120.53   | 470.7357 | 940.462  | 0.0019  | 2    | 4.21     | 22338.2  | 8.65  | HUMAN  | Q6K830                          | Peroxiredoxin-1                                                          |
| 8730 | dirMS_041712_NAR_30mM_minus.17331.17331.2 | 2 | 10.81 | 0.115E+04       | (K)IVPNN(K)I/V/I/P/N/M/E/F(R)A              | 142.55   | 525.7932 | 1104.587 | -0.0079 | -7.2 | 5.97     | 86978.8  | 5.31  | HUMAN  | B4DUQ5                          | Eporin-2                                                                 |
| 8731 | dirMS_041712_NAR_50mM_minus.15508.15048.3 | 3 | 10.81 | 0.232E+05       | (R)GAPSS(R)A/P/P/S/S/N/E/D/F/H/G/L/P/K(G)   | 153.2    | 593.6414 | 1779.907 | 0.0034  | 1.9  | 5.32     | 100478.9 | 5.71  | HUMAN  | ABM099                          | Matrin-3                                                                 |
| 8732 | dirMS_041712_NAR_60mM_minus.11204.11204.3 | 3 | 10.81 | 1.658E+04       | (K)KIDTWN(K)D/K/T/D/M/V/D/M/S/G/P/R(A)      | 122.35   | 531.901  | 1601.763 | -0.0047 | -2.7 | 5.96     | 21261.7  | 5.37  | HUMAN  | IK8TR8                          | HO-GDP-dissociation inhibitor 1 (Fragment)                               |
| 8733 | dirMS_041712_NAR_60mM_minus.12117.12117.3 | 3 | 10.81 | 1.377E+05       | (K)QAAGK(K)A/A/G/K/A/E/L/E/L/E(L)G(R)       | 127.53   | 476.5974 | 1427.785 | -0.0076 | -5.3 | 4.79     | 53377.8  | 5.74  | HUMAN  | Q15149                          | Plectin                                                                  |
| 8734 | dirMS_041712_NAR_60mM_minus.8699.8693.3   | 3 | 10.81 | 0.720E+05       | (K)QVDES(K)Q/E/V/D/S/G/P/S/L/R(N)           | 108.87   | 506.2391 | 1516.703 | 0.0001  | 0.1  | 4.65     | 123697.1 | 5.83  | HUMAN  | AS480                           | POTE ankyrin domain family member F                                      |
| 8735 | dirMS_041712_NAR_60mM_minus.8753.8753.3   | 3 | 10.81 | 1.114E+05       | (K)FKGDK(K)G/A/G/D/G/V/M/T/L/S(R)T          | 109.12   | 483.9126 | 1479.711 | 0.0118  | 8    | 8.38     | 11854.4  | 6.57  | HUMAN  | P91849                          | Protein S100-A11                                                         |
| 8736 | dirMS_041712_NAR_120mM_plus.12993.12993.3 | 3 | 10.81 | 0.353E+05       | (K)HVTSS(K)H/V/T/S/C/L/G/L/W/N/R(Q)         | 121.52   | 459.2138 | 1375.625 | 0.0023  | 1.7  | 6.75     | 34221.3  | 6.44  | HUMAN  | PI5224                          | Desmoglein                                                               |
| 8737 | dirMS_041712_NAR_120mM_plus.16808.16849.4 | 4 | 10.81 | 1.968E+05       | (K)FJSHIEA(K)F/S/H/E/V/A/M/T/V/T/A/L/P/R(T) | 141.43   | 458.7454 | 1831.948 | 0.0114  | 6.2  | 6.76     | 39795.8  | 9.08  | HUMAN  | HQBQNA                          | Fructose-bisphosphate aldolase                                           |
| 8738 | dirMS_041712_NAR_20mM_plus.14282.14282.3  | 3 | 10.81 | 0.724E+03       | (R)IVPTAN(R)V/P/T/A/N/S/V/D/L/T/C(R)L       | 169.75   | 510.9348 | 1530.795 | -0.0046 | -3   | 5.81     | 31718.5  | 7.17  | HUMAN  | TEU7U4                          | Glyceroldehyde-3-phosphate dehydrogenase                                 |
| 8739 | dirMS_041712_NAR_20mM_plus.15465.15465.2  | 2 | 10.81 | 0.727E+04       | (R)IVANP(R)K/A/V/L/P/L/C/D/V/D(Y)R          | 178.62   | 474.3735 | 1447.736 | 0.0035  | 2.4  | 5.88     | 83880.6  | 7.13  | HUMAN  | F3H365                          | Protein transport protein Sec23A                                         |
| 8740 | dirMS_041712_NAR_20mM_plus.7695.7695.2    | 2 | 10.81 | 0.207E+05 M328m | (K)LADE(K)K/L/I/D/V/D/E(V)A                 | 120.63   | 460.741  | 904.481  | 15.9993 | 1.1  | 4.17     | 41827.5  | 7     | HUMAN  | Q72749                          | Phosphoglycerate kinase                                                  |
| 8741 | dirMS_041712_NAR_30mM_plus.16904.16904.2  | 2 | 10.81 | 0.366E+05       | (K)SNQ(L)K(S)N/Q/L/V/D/I/E(K)V              | 141.3    | 643.8504 | 1286.695 | -0.0015 | -1.2 | 4.37     | 22568.6  | 6.35  | HUMAN  | BK3Q25                          | Protasome activator complex subunit 3                                    |
| 8742 | dirMS_041712_NAR_40mM_plus.19360.19360.3  | 3 | 10.81 | 1.409E+05       | (K)ALFEE(K)A/L/E/E/V/P/E/L/E/A/E/K(E)       | 181.65   | 515.9991 | 1845.984 | -0.0017 | -2.9 | 6.32     | 65036    | 6.27  | HUMAN  | EP9U3                           | Phosphoribosylaminimidazolecarboxamide formyltransferase                 |
| 8743 | dirMS_041712_NAR_50mM_plus.20237.20237.3  | 3 | 10.81 | 0.512E+05       | (R)QAPPT(R)Q/A/R/P/Y/A/T/A/M/L/S/L/L(K)     | 174.62   | 597.9962 | 1791.979 | -0.0045 | -2.5 | 9.99     | 150022.8 | 9.1   | HUMAN  | FEW200                          | Uncoupler non-proton                                                     |
| 8744 | dirMS_041712_NAR_50mM_plus.29417.31.3     | 3 | 10.81 | 0.855E+04       | (R)KQAE(K)K/L/V/L/E/L/A/L/E(L)K             | 116.48   | 516.2848 | 1381.281 | 0.0014  | 0.9  | 5.32     | 12617.9  | 6.07  | HUMAN  | FP9F2                           | Diallylthioesterase                                                      |
| 8745 | dirMS_041712_NAR_60mM_plus.15542.15542.3  | 3 | 10.81 | 0.404E+05       | (R)TRPHE(R)T/P/L/L/A/E/L/S/L(K)             | 137.92   | 407.9112 | 1221.722 | -0.0011 | -0.9 | 6.41     | 142262.8 | 6.41  | HUMAN  | QK0211                          | ATP-dependent RNA helicase A                                             |
| 8746 | dirMS_041712_NAR_60mM_plus.20909.20909.3  | 3 | 10.81 | 1.136E+05       | (K)TFFVNT(K)F/T/V/I/T/P/A/E/G/V/L/G/D/K(R)S | 116.28   | 639.0248 | 1915.065 | -0.0049 | -2.6 | 5.74     | 17630.6  | 11.62 | HUMAN  | IL3L05                          | Profilin-1 (Fragment)                                                    |
| 8747 | dirMS_041712_NAR_120mM_minus.4366.4527.3  | 3 | 10.79 | 1.150E+07 M310m | (R)TKTISE(R)R/T/V/T/E/V/S/M/R(N)            | 72.87    | 408.8693 | 1208.594 | 15.9994 | 3.7  | 5.81     | 37296.3  | 5.33  | HUMAN  | FBVU64                          | Keratin, type I cytoskeletal 8                                           |
| 8748 | dirMS_041712_NAR_20mM_plus.7304.7304.2    | 2 | 10.79 | 0.399E+03       | (K)VEDEK(K)E/V/E/E/L/S/L/E/E/R(N)           | 130.98   | 568.8412 | 1533.219 | -0.0006 | -2.3 | 4.59     | 29389.9  | 10.17 | HUMAN  | GRN15                           | 40S ribosomal protein theta (Fragment)                                   |
| 8749 | dirMS_041712_NAR_30mM_minus.6442.6442.2   | 2 | 10.79 | 0.191E+04       | (K)VEDEK(K)E/V/E/E/L/S/L/E/E/R(N)           | 89.48    | 520.7257 | 1040.442 | 0.0023  | 2.2  | 3.91     | 92752.5  | 4.76  | HUMAN  | PI4625                          | Endoplasmic                                                              |
| 8750 | dirMS_041712_NAR_40mM_minus.11864.12007.3 | 3 | 10.79 | 0.278E+05       | (K)DAGEG(K)D/A/G/L/L/AV/G/T/D/P/G/K(P)K     | 154.02   | 646.6785 | 1938.018 | 0.0031  | 1.6  | 4.32     | 28472.4  | 5.71  | HUMAN  | PI2333                          | Filamin-A                                                                |
| 8751 | dirMS_041712_NAR_50mM_minus.10397.10397.3 | 3 | 10.79 | 0.278E+05 M35m  | (K)AASDA(K)A/A/S/D/I/A/M/T/E/V/T/H/P(R)I    | 127.16   | 612.6466 | 1819.937 | 15.9942 | 0.4  | 5.32     | 12926.1  | 4.4   | HUMAN  | FEW200                          | 14-3-3 protein epsilon (Fragment)                                        |
| 8752 | dirMS_041712_NAR_50mM_minus.14292.14292.3 | 3 | 10.79 | 1.964E+04       | (R)TPWLL(R)P/P/W/L/E/B/V/P/Q(P)T            | 149.27   | 494.6088 | 1484.811 | -0.0052 | -3.5 | 5.74     | 80524.2  | 5.05  | HUMAN  | D0PK44                          | Alpha actinin 4 short isoform                                            |
| 8753 | dirMS_041712_NAR_50mM_plus.6784.6784.3    | 3 | 10.79 | 1.255E+04       | (R)KALDE(K)K/L/A/L/P/E/R/E/E/K(A)E(L)       | 104.98   | 563.2743 | 1687.829 | -0.0020 | -1.2 | 4.69     | 13966.5  | 5.4   | HUMAN  | Q72749                          | C-Myc-binding protein                                                    |
| 8754 | dirMS_041712_NAR_60mM_minus.10044.10044.3 | 3 | 10.79 | 0.113E+05       | (K)YVGGY(K)Q/V/L/G/L/S/G/R/P/V/P(R)T        | 115.72   | 587.9276 | 1761.903 | 0.0002  | 0.1  | 9.99     | 37984.9  | 5.84  | HUMAN  | PE2140                          | Serine/threonine-protein phosphatase PP1-beta catalytic subunit          |
| 8755 | dirMS_041712_NAR_60mM_minus.15099.15099.3 | 3 | 10.79 | 1.180E+05       | (K)KIDLSTY(K)K/D/L/S/T/V/E/L/A/L/Q/L/N(K)   | 144.25   | 524.6738 | 1571.9   | -0.0015 | -0.9 | 6.07     | 13242.4  | 4.17  | HUMAN  | EP9PH5                          | Acidic leucine-rich nuclear phosphoprotein 32 family member B (Fragment) |
| 8756 | dirMS_041712_NAR_60mM_minus.16752.16752.3 | 3 | 10.79 | 1.308E+05       | (R)KLPPA(R)K/L/P/V/V/T/A/D/L(R)             | 153.88   | 432.6066 | 1295.805 | -0.0023 | -1.8 | 8.75     | 28971.3  | 8.6   | HUMAN  | F83117                          | Electron transfer flavin subunit beta                                    |
| 8757 | dirMS_041712_NAR_60mM_plus.1421.9148.3    | 3 | 10.79 | 0.512E+05       | (R)KALDE(K)K/L/A/L/P/E/R/E/E/K(A)E(L)       | 111.21   | 516.2848 | 1381.281 | 0.0014  | 0.9  | 5.32     | 12617.9  | 6.07  | HUMAN  | FP9F2                           | Diallylthioesterase                                                      |
| 8758 | dirMS_041712_NAR_120mM_plus.5946.5946.4   | 4 | 10.79 | 2.578E+05       | (R)KTKQAR(K)T/Q/A/P/G/S/V/T/A/A/N/K(N)G     | 83.85    | 405.4826 | 1798.908 | -0.0003 | -0.2 | 9.83     | 11447.2  | 9.81  | HUMAN  | CFI9F7                          | Cytochrome C (Fragment)                                                  |
| 8759 | dirMS_041712_NAR_20mM_plus.10485.10485.3  | 3 | 10.79 | 0.260E+05       | (R)AQIFAN(R)Q/A/Q/V/A/M/T/V/T/A/L/P/R(T)    | 145.25   | 440.5608 | 1319.67  | -0.0024 | -1.8 | 5.79     | 43773.3  | 5.26  | HUMAN  | F8V219                          | Keratin, type I cytoskeletal 18                                          |
| 8760 | dirMS_041712_NAR_20mM_plus.13978.14355.3  | 3 | 10.79 | 0.357E+06 M313m | (R)TVQSL(R)R/V/A/S/L/E/V/D/D/S/M R(N)       | 170.13   | 508.2539 | 1506.747 | 15.9943 | 0.4  | 4.03     | 43773.3  | 5.26  | HUMAN  | F8V219                          | Keratin, type I cytoskeletal 18                                          |
| 8761 | dirMS_041712_NAR_20mM_plus.14137.14137.2  | 2 | 10.79 | 0.232E+06       | (R)ALAEQ(R)A/L/A/S/D/E/L/S/L/E/E/R(N)       | 142.2    | 486.7889 | 972.527  | -0.0017 | -1.7 | 6.05     | 13798.9  | 10.17 | HUMAN  | GRN15                           | 40S ribosomal protein S25                                                |
| 8762 | dirMS_041712_NAR_20mM_plus.16838.16838.2  | 2 | 10.79 | 0.277E+05       | (K)GLSSGN(K)G/S/A/V/I/S/L/D/K/P(L)          | 168.28   | 670.8917 | 1340.778 | -0.0023 | -1.7 | 6        | 22856    | 8.8   | HUMAN  | EP9K25                          | Cofilin-1                                                                |
| 8763 | dirMS_041712_NAR_30mM_plus.9442.9442.2    | 2 | 10.79 | 0.541E+05       | (R)GGG(R)R/G/G/S/G/L/I/P/T(A)R              | 103.97   | 485.2772 | 969.548  | -0.0005 | -0.5 | 9.75     | 15036.9  | 7.16  | HUMAN  | K7E174                          | 16S kDa small nuclear ribonucleoprotein component (Fragment)             |
| 8764 | dirMS_041712_NAR_40mM_plus.14233.14243.3  | 3 | 10.79 | 0.120E+05       | (R)LLVLE(R)R/L/V/L/E/V/A/H/G/L/E/S/T(V)R    | 149.27   | 550.9702 | 1650.917 | -0.0033 | -2   | 5.4      | 53307.5  | 5.25  | HUMAN  | FBVPU9                          | ATP synthase subunit beta                                                |
| 8765 | dirMS_041712_NAR_50mM_plus.16640.16640.3  | 3 | 10.79 | 1.333E+05       | (K)LITELL(K)K/L/G/L/V/L/P/D/G/M(K)K         | 155.22   | 552.9815 | 1656.935 | -0.0054 | -3.2 | 6.07     | 7070     | 7.16  | HUMAN  | Q7SM13                          | ATP-binding cassette sub-family F member 2                               |
| 8766 | dirMS_041712_NAR_50mM_plus.17807.17807.3  | 3 | 10.79 | 0.456E+05 M46m  | (K)GGG(R)G/G/S/A/V/I/S/L/D/K/P(L)           | 168.28   | 670.8917 | 1340.778 | -0.0023 | -1.7 | 6        | 22856    | 8.8   | HUMAN  | EP9K25                          | Cofilin-1                                                                |
| 8767 | dirMS_041712_NAR_50mM_plus.9354.9354.3    | 3 | 10.79 | 0.240E+05 M378m | (K)imVDP(K)M/I/V/D/P/P/E/P/G/H/E(K)F        | 116.62   | 499.9106 | 1481.713 | 16.0045 | 6.4  | 4.65     | 90316.8  | 5.52  | HUMAN  | Q13263                          | Trans                                                                    |

|      |                                             |   |       |   |          |                                                           |                      |        |          |          |         |      |      |          |       |       |        |                                                                      |
|------|---------------------------------------------|---|-------|---|----------|-----------------------------------------------------------|----------------------|--------|----------|----------|---------|------|------|----------|-------|-------|--------|----------------------------------------------------------------------|
| 8825 | dirMS_041712_NAR_30mM_minus1.14039.14039.2  | 2 | 10.75 | 0 | 2.72E+05 | (K)ICDFPM(K)C D I F P/V M(K)F                             | C.Carbonbamification | 129.67 | 455.7144 | 910.416  | 0.0054  | 5.9  | 5.84 | 21005.6  | 1012  | HUMAN | Q04760 | Lactoyglutathione lyase                                              |
| 8826 | dirMS_041712_NAR_30mM_minus1.16749.16749.2  | 2 | 10.75 | 0 | 1.85E+05 | (K)FVPP(K)K A N P I P P A A V(R)G                         |                      | 145.35 | 545.2937 | 1089.584 | -0.0039 | -3.5 | 9.75 | 61363    | 8.73  | HUMAN | C9J059 | Propionyl-CoA carboxylase beta chain, mitochondrial                  |
| 8827 | dirMS_041712_NAR_30mM_minus1.19045.19049.2  | 2 | 10.75 | 0 | 2.12E+05 | (K)MAGL(R)K V N P P V G L L(R)K                           |                      | 158.0  | 433.8887 | 1299.654 | -0.005  | -2.4 | 4.78 | 32395.7  | 9.31  | HUMAN | 6R924  | Transcription intermediary factor 1-beta                             |
| 8828 | dirMS_041712_NAR_30mM_minus1.14476.14476.3  | 3 | 10.75 | 1 | 4.84E+05 | (K)FANPP(R)K E V K P G Q(V)I/D C S V(L)R(G)               | C.Carbonbamification | 145.27 | 595.6534 | 1784.958 | -0.0118 | -6.6 | 4.68 | 56186.7  | 5.47  | HUMAN | B4D088 | T-complex protein 1 subunit gamma                                    |
| 8829 | dirMS_041712_NAR_30mM_minus1.6118.6118.3    | 3 | 10.75 | 0 | 4.44E+05 | M437m (K)EISG(Q)R L E I S G M(Q)N I S V(H)P T(K)T         | m.Dnaad methionine   | 197.77 | 677.9018 | 1475.698 | -0.0157 | -1.5 | 6.75 | 56607.4  | 5.37  | HUMAN | F8V084 | Keratin, type II cytoskeletal 8                                      |
| 8830 | dirMS_041712_NAR_50mM_minus1.9049.9049.3    | 3 | 10.75 | 0 | 7.04E+04 | (K)EAMALA(R)E A N A L A A G A(Q)A V A I V A N A R(L)      |                      | 119.77 | 615.6611 | 1844.973 | -0.0038 | -2.1 | 6.85 | 27689.3  | 5.79  | HUMAN | O15200 | Spectrin beta chain, non-erythrocytic 2                              |
| 8831 | dirMS_041712_NAR_50mM_minus1.6531.6531.3    | 3 | 10.75 | 1 | 8.87E+04 | (K)SSESPF(R)K E S P E F E L L(R)K                         |                      | 184.9  | 433.8887 | 1299.654 | -0.005  | -2.4 | 4.78 | 32395.7  | 9.31  | HUMAN | 6R924  | Heterogeneous nuclear ribonucleoprotein A1                           |
| 8832 | dirMS_041712_NAR_30mM_plus2.6302.6302.2     | 2 | 10.75 | 0 | 2.56E+05 | (K)SMALQ(K)S A I V L I Q I A(E)R(K)                       |                      | 87.2   | 437.2414 | 873.479  | -0.0033 | -3.8 | 5.72 | 28218.2  | 9.35  | HUMAN | FK838  | Customer subunit gamma-2                                             |
| 8833 | dirMS_041712_NAR_30mM_plus2.9688.9703.2     | 2 | 10.75 | 0 | 3.55E+05 | (K)TSGPP(R)R T S L I G M P N G L D K(K)M                  |                      | 104.43 | 501.2717 | 1001.526 | -0.0099 | -3.9 | 5.5  | 55804.4  | 5.33  | HUMAN | BZ7A1  | T-complex protein 1 subunit epsilon                                  |
| 8834 | dirMS_041712_NAR_40mM_plus2.7674.7674.2     | 2 | 10.75 | 0 | 2.04E+04 | (K)INISG(R)R N I N S I V G N P V E R I(K)                 |                      | 105.07 | 644.7998 | 1288.595 | -0.0027 | -2.1 | 4.53 | 32621    | 8.75  | HUMAN | B4DCL0 | Poly(C)-binding protein                                              |
| 8835 | dirMS_041712_NAR_30mM_plus2.10123.10123.3   | 3 | 10.75 | 1 | 5.30E+05 | (K)KSTGG(K)K S T G G A P P T F N I V T Y K T D T(K)       | C.Carbonbamification | 120.03 | 575.303  | 1723.886 | -0.0003 | -4.8 | 8.41 | 11504.1  | 9.57  | HUMAN | FK744  | Profilin 1, isoform CRA_D                                            |
| 8836 | dirMS_041712_NAR_50mM_plus2.18384.18384.3   | 3 | 10.75 | 0 | 4.67E+05 | (K)RIVVLC(R)R V I V V V L V C N I V A I R(K)              |                      | 139.48 | 501.2717 | 1001.526 | -0.0099 | -7.2 | 10   | 59484.7  | 6.61  | HUMAN | FK1077 | Tyrosine-tRNA ligase, cytoplasmic                                    |
| 8837 | dirMS_041712_NAR_50mM_plus2.8101.8101.3     | 3 | 10.75 | 1 | 3.71E+05 | (K)RIVVYD(R)R L V N I D A C Q K V T F R G Q Q E R(K)      |                      | 109.88 | 605.3151 | 1813.94  | -0.0055 | -5.2 | 4.68 | 90316.8  | 5.52  | HUMAN | Q13263 | Transcription intermediary factor 1-beta                             |
| 8838 | dirMS_041712_NAR_60mM_plus1.2042.12042.2    | 2 | 10.75 | 1 | 7.93E+05 | (K)KE8IAA(K)K I E I A E I A V L G T(K)                    |                      | 120.2  | 626.8335 | 1252.661 | -0.0009 | -0.7 | 5.9  | 17973    | 5.16  | HUMAN | ENP065 | Heat shock cognate 71 kDa protein (Fragment)                         |
| 8839 | dirMS_041712_NAR_60mM_plus1.14280.14280.3   | 3 | 10.75 | 1 | 6.49E+05 | (K)WJWSDS(K)K D I S D E I A I D I L V A I K(E)            |                      | 131.03 | 497.2559 | 1489.753 | -0.0002 | -0.1 | 4.23 | 20982.2  | 5.23  | HUMAN | Q13185 | Chromobox protein homolog 3                                          |
| 8840 | dirMS_041712_NAR_120mM_minus1.2206.1206.3   | 3 | 10.74 | 1 | 2.45E+05 | (R)MOKFT(R)M Q K E I T A I L A P S T M A N(K)K            |                      | 119.85 | 516.941  | 1548.812 | 0.0005  | 0.3  | 8.35 | 32616.5  | 5.18  | HUMAN | ANR176 | Actin, alpha skeletal muscle                                         |
| 8841 | dirMS_041712_NAR_120mM_minus1.18450.18450.3 | 3 | 10.74 | 0 | 1.63E+05 | (K)RIFHQ(R)H I Q L D V D I D L Q I S I R(K)               |                      | 155.4  | 533.9425 | 1599.813 | 0.0004  | 0.3  | 4.41 | 24897.7  | 9.84  | HUMAN | ABMTM1 | Carbamoyl reductase [NADPH] 1                                        |
| 8842 | dirMS_041712_NAR_20mM_minus1.13569.13569.2  | 2 | 10.74 | 0 | 1.36E+05 | (K)RQAEY(R)Q A Q E Y I E A I N I M V(K)                   |                      | 186.8  | 710.3754 | 1419.748 | -0.0043 | -3   | 4.53 | 43773.3  | 5.26  | HUMAN | F8V279 | Keratin, type I cytoskeletal 18                                      |
| 8843 | dirMS_041712_NAR_30mM_minus1.18230.18230.2  | 2 | 10.74 | 0 | 8.12E+04 | (K)ICDPLFS(K)C D I P V I S F R(D)                         |                      | 153.88 | 559.7501 | 1118.494 | -0.0006 | -0.5 | 5.55 | 42963.5  | 5.19  | HUMAN | P93237 | Serin B6                                                             |
| 8844 | dirMS_041712_NAR_40mM_minus1.7815.7815.3    | 3 | 10.74 | 0 | 7.49E+04 | M44m (K)SSTGFM(K)S G I G V I A N I S V M P N F P Q I M(K) | C.Carbonbamification | 125.22 | 646.9867 | 1306.955 | 31.9908 | 0.5  | 8.46 | 8797.3   | 9.3   | HUMAN | H83850 | V-type proton ATPase 16 kDa proteolipid subunit mTgapp41 phosphatase |
| 8845 | dirMS_041712_NAR_50mM_minus1.15453.15453.3  | 3 | 10.74 | 0 | 7.78E+04 | (R)DLTPEH(R)R L I P T F H L L A L L R(K)                  |                      | 155.08 | 435.2497 | 1303.737 | -0.0023 | -1.8 | 5.32 | 38795.2  | 5.93  | HUMAN | Q56C86 | mTgapp41 phosphatase                                                 |
| 8846 | dirMS_041712_NAR_50mM_minus1.16537.16537.3  | 3 | 10.74 | 1 | 1.87E+04 | (R)EJQLEH(R)E V Q L E I A E A R D L V S Y(K)E             |                      | 161.82 | 610.3273 | 1828.965 | 0.0023  | 1.2  | 4.25 | 45984.6  | 6.24  | HUMAN | B4E16G | Galactokinase                                                        |
| 8847 | dirMS_041712_NAR_60mM_minus1.14422.14422.3  | 3 | 10.74 | 1 | 2.87E+05 | (K)KSDISE(R)K S D I D E I E V L V G G S T(R)R             |                      | 139.9  | 530.2846 | 1588.854 | -0.0148 | -9.3 | 4.56 | 72445.7  | 5.07  | HUMAN | P11021 | 78 kDa glucose-regulated protein                                     |
| 8848 | dirMS_041712_NAR_60mM_minus1.18645.18645.3  | 3 | 10.74 | 0 | 2.58E+05 | (R)KDLKRP(R)R F I L L K P E L L V L R(K)                  |                      | 165.43 | 415.25   | 1243.741 | -0.0054 | -4.4 | 6.04 | 30944.2  | 6.52  | HUMAN | B1Q221 | ATP-dependent RNA helicase DDX39A                                    |
| 8849 | dirMS_041712_NAR_120mM_plus1.5262.15263.3   | 3 | 10.74 | 1 | 9.12E+05 | (K)RIVKAP(R)K K P A P D T T S F S E A I L L R(K)R         |                      | 131    | 630.011  | 1888.017 | 0.0001  | 0.5  | 6.15 | 42898.6  | 5.19  | HUMAN | Q12095 | Interleukin enhancer-binding factor 2                                |
| 8850 | dirMS_041712_NAR_20mM_plus1.14965.14965.2   | 2 | 10.74 | 0 | 2.17E+05 | (K)IGYATN(K)K L A I T T F S I D E D A N(K)I               |                      | 175.3  | 740.3693 | 1479.733 | -0.0021 | -0.8 | 4.03 | 40918.8  | 9.33  | HUMAN | B4DPS2 | HCG2005638, isoform CRA_c                                            |
| 8851 | dirMS_041712_NAR_30mM_plus2.19300.19300.2   | 2 | 10.74 | 0 | 2.93E+05 | (K)ITVDFN(K)K V I D I N F N I A U I A T G E(K)            |                      | 151.93 | 682.8539 | 1364.706 | -0.0051 | -3.7 | 4.37 | 23799.1  | 9.48  | HUMAN | P23284 | Pepstatin-prolyl cis-trans isomerase 8                               |
| 8852 | dirMS_041712_NAR_30mM_plus2.21466.21466.2   | 2 | 10.74 | 0 | 3.90E+05 | (R)IVNQAN(R)R N Q A I I V I L L Q I G A R(E)              | C.Carbonbamification | 166.88 | 571.3976 | 1501.794 | -0.0045 | -4.3 | 9.72 | 23047.2  | 9.95  | HUMAN | FA6782 | 40S ribosomal protein S5                                             |
| 8853 | dirMS_041712_NAR_30mM_plus2.11681.11681.2   | 2 | 10.74 | 0 | 2.85E+05 | (K)RIVVYD(R)R L V N I D A C Q K V T F R G Q Q E R(K)      |                      | 109.88 | 605.3151 | 1813.94  | -0.0055 | -5.2 | 4.68 | 90316.8  | 5.52  | HUMAN | Q13263 | Transcription intermediary factor 1-beta                             |
| 8854 | dirMS_041712_NAR_30mM_plus2.8427.8427.2     | 2 | 10.74 | 0 | 5.88E+05 | (R)ILIGCE(R)K I G L V G E G A E I L K(S)                  |                      | 98.35  | 501.2719 | 1002.511 | 0.0103  | 10.3 | 4.25 | 40096.8  | 9.24  | HUMAN | C9W169 | Ring finger of chromosome-16 protein (Fragment)                      |
| 8855 | dirMS_041712_NAR_40mM_plus2.6996.6998.2     | 2 | 10.74 | 0 | 2.31E+05 | (K)NMMAA(K)M N I M I A I C D P R(K)R                      | C.Carbonbamification | 101.42 | 533.2182 | 1065.427 | 0.0017  | 1.6  | 5.84 | 50199.4  | 4.75  | HUMAN | ABN823 | Tubulin beta-8 chain-like protein LOC260334                          |
| 8856 | dirMS_041712_NAR_50mM_plus2.21601.21601.3   | 3 | 10.74 | 1 | 1.93E+05 | (K)KIVNFR(K)K V N P I P A I F T L S(K)                    |                      | 184.3  | 539.0011 | 1614.983 | -0.0058 | -3.6 | 8.59 | 33536.6  | 6.01  | HUMAN | Q12404 | Cytoskeletal dynein 1 heavy chain 1                                  |
| 8857 | dirMS_041712_NAR_60mM_plus1.16113.16113.3   | 3 | 10.74 | 1 | 2.45E+05 | (R)K32T(R)K S T G G A P P T F N I V T Y K T D T(K)        |                      | 96.33  | 601.2447 | 1164.983 | -0.005  | -5.6 | 4.68 | 16113.3  | 5.25  | HUMAN | Q12095 | Interleukin enhancer-binding factor 2                                |
| 8858 | dirMS_041712_NAR_50mM_plus2.9537.9537.3     | 3 | 10.74 | 1 | 1.35E+05 | (K)KINVSLELR(V)S I E L D R T P P E V S(K)K                |                      | 117.42 | 567.2803 | 1699.85  | 0.0036  | 2.1  | 4.41 | 136658.9 | 5.13  | HUMAN | Q15393 | Splincing factor 3B subunit 3                                        |
| 8859 | dirMS_041712_NAR_50mM_plus2.9577.9577.3     | 3 | 10.74 | 0 | 7.71E+05 | (R)DNHQGR(R)N I V Q I G I V T K P I A R(K)                |                      | 117.22 | 442.5902 | 1325.754 | 0.0025  | 1.9  | 8.75 | 11367.1  | 11.36 | HUMAN | P62805 | Histone H4                                                           |
| 8860 | dirMS_041712_NAR_60mM_plus1.16694.16694.3   | 3 | 10.74 | 1 | 1.13E+06 | (R)EILSNAR(R)E L I S V A N S D A L D I K R(I)R            |                      | 144.67 | 515.6144 | 1544.828 | 0.0005  | 0.5  | 4.56 | 5582.4   | 4.81  | HUMAN | F8W026 | Endoplasmic reticulum                                                |
| 8861 | dirMS_041712_NAR_60mM_plus1.7985.7985.3     | 3 | 10.74 | 1 | 4.32E+05 | (R)IQLDLE(R)I Q L D L Q I L E A I E I C Q R(K)R           |                      | 99.82  | 497.9111 | 1373.723 | -0.0039 | -2.9 | 4.79 | 64042.3  | 9.02  | HUMAN | Q8N164 | Leucine-rich repeat-containing protein 47                            |
| 8862 | dirMS_041712_NAR_120mM_minus1.1931.1931.3   | 3 | 10.73 | 2 | 2.05E+05 | (R)IVSSTP(R)R V E S T D I Q I S K I L E I K L(K)          |                      | 119.27 | 637.325  | 1490.975 | -0.0149 | -7.8 | 4.78 | 83605    | 4.97  | HUMAN | FK8238 | Heat shock protein isoform 90-SP                                     |
| 8863 | dirMS_041712_NAR_30mM_minus1.8249.8249.2    | 2 | 10.73 | 0 | 1.96E+04 | (R)QLFEAR(R)Q L E E A I E E I A N I A R(K)                |                      | 99.67  | 666.3074 | 1331.607 | 0.0006  | 0.4  | 3.98 | 227783.5 | 5.5   | HUMAN | P35579 | Myosin-9                                                             |
| 8864 | dirMS_041712_NAR_30mM_minus1.9986.9986.2    | 2 | 10.73 | 0 | 3.52E+05 | (K)LAEPQF(K)I A I A E P Q P R(D)                          |                      | 108.9  | 430.7364 | 860.462  | 0.0033  | 3.5  | 6    | 15778.8  | 9.12  | HUMAN | EP8110 | Transcription factor BT3 homolog 4                                   |
| 8865 | dirMS_041712_NAR_40mM_minus1.8158.8158.2    | 2 | 10.73 | 1 | 3.18E+05 | (R)IDGLVS(R)D K G L V S I S S D V P P R(K)                |                      | 128.2  | 491.9311 | 1473.78  | -0.0008 | -0.5 | 4.56 | 56607.4  | 5.37  | HUMAN | F8V084 | Keratin, type I cytoskeletal 8                                       |
| 8866 | dirMS_041712_NAR_50mM_minus1.10455.10455.3  | 3 | 10.73 | 1 | 2.87E+05 | (R)ITSEKAR(R)K V N P I P A I F T L S(K)                   |                      | 127.9  | 561.2629 | 1649.12  | -0.0026 | -1.7 | 4.1  | 12626    | 6.17  | HUMAN | P35579 | Myosin-9                                                             |
| 8867 | dirMS_041712_NAR_50mM_minus1.10555.11139.3  | 3 | 10.73 | 1 | 4.01E+05 | (R)NIVYNN(R)N I V N I V Y N I E A T G Q X Y V R(K)        |                      | 112.28 | 615.3184 | 1843.934 | 0.0069  | 3.8  | 8.43 | 50286.6  | 4.79  | HUMAN | FK6871 | Tubulin beta-4B chain                                                |
| 8868 | dirMS_041712_NAR_50mM_minus1.16933.16933.3  | 3 | 10.73 | 0 | 1.44E+05 | (K)ITVSGN(K)K V I S G V V N G P L V I L V I V(K)          |                      | 164.98 | 549.9835 | 1647.943 | -0.0027 | -4.2 | 6.41 | 6939     | 10.41 | HUMAN | ENR6H6 | V-type proton ATPase subunit B, brain isoform                        |
| 8869 | dirMS_041712_NAR_60mM_minus1.14262.14274.3  | 3 | 10.73 | 1 | 2.95E+05 | (K)KIALQGL(K)K I I Q I Q I G V L V L I K E L(K)           |                      | 139.65 | 509.2999 | 1525.895 | -0.0097 | -6.3 | 6.18 | 26616.1  | 5.68  | HUMAN | ENR9PU | Epipkalin                                                            |
| 8870 | dirMS_041712_NAR_60mM_minus1.40712.12172.3  | 3 | 10.73 | 1 | 2.40E+05 | (R)KIVGSK(R)K G S I G L I V L V I V N I P V T V X(K)      |                      | 153.72 | 549.9836 | 1647.943 | -0.002  | 0.1  | 4.79 | 23020.5  | 4.87  | HUMAN | AK8400 | Hepatitis-derived growth factor                                      |
| 8871 | dirMS_041712_NAR_60mM_minus1.6479.6479.3    | 3 | 10.73 | 1 | 1.99E+05 | (R)EJAEAR(R)R I I E A V P Q E F I Q I K(K)                |                      | 93.53  | 489.5907 | 1466.76  | -0.0022 | -1.5 | 4.79 | 15660.9  | 10.38 | HUMAN | IL31Y9 | FYWCH family member 2                                                |
| 8872 | dirMS_041712_NAR_120mM_plus1.7622.7622.3    | 3 | 10.73 | 1 | 2.02E+06 | M281m (R)RSRAEAR(R)R A E A E I S m Y I P I Q I K(K)       | m.Dnaad methionine   | 93.02  | 476.8977 | 1412.684 | -0.0157 | -4.1 | 5.86 | 37296.3  | 5.3   | HUMAN | F8VU64 | Keratin, type II cytoskeletal 8                                      |
| 8873 | dirMS_041712_NAR_20mM_plus1.13658.13889.2   | 2 | 10.73 | 0 | 6.17E+05 | (R)IGALN(R)R G A                                          |                      |        |          |          |         |      |      |          |       |       |        |                                                                      |

|      |                                            |   |       |   |          |                                                      |        |          |          |         |       |      |          |            |        |                                                              |
|------|--------------------------------------------|---|-------|---|----------|------------------------------------------------------|--------|----------|----------|---------|-------|------|----------|------------|--------|--------------------------------------------------------------|
| 8934 | dirMS_041712_NAR_20mM_plus.16438.16438.3   | 3 | 10.7  | 0 | 1.35E+05 | (RI)QAQVEY(R)A(Q)EYV(A)A/L(N)K(V)                    | 184.45 | 473.9191 | 1419.748 | -0.0051 | -3.6  | 4.53 | 43773.3  | 5.26 HUMAN | F8V2Y9 | Keratin, type I cytoskeletal 18                              |
| 8935 | dirMS_041712_NAR_30mM_plus.2087.2087.2     | 3 | 10.7  | 0 | 1.83E+05 | (K)EGLLW(K)E G L U L W/C Q R(K)                      | 163.22 | 987.8038 | 1174.604 | -0.0034 | -2.9  | 6.1  | 104488.6 | 5.36 HUMAN | B2R2CS | Actinin, alpha 2, isoform CRA_b                              |
| 8936 | dirMS_041712_NAR_50mM_plus.12895.12895.3   | 3 | 10.7  | 0 | 1.35E+05 | (K)EGLLW(K)E L A D A D S A E N D E(N)KS              | 145.28 | 563.0223 | 1580.269 | -0.0058 | -5.1  | 4.93 | 1721.95  | 6.25 HUMAN | F5H4J2 | Flag endonuclease 3 (Fragment)                               |
| 8937 | dirMS_041712_NAR_50mM_plus.6363.6363.3     | 3 | 10.7  | 0 | 6.07E+05 | M437M                                                | 98.85  | 497.9026 | 1174.608 | -0.0051 | 0.1   | 6.75 | 56607.4  | 5.37 HUMAN | F8V84A | Keratin, type II cytoskeletal 8                              |
| 8938 | dirMS_041712_NAR_120mM_minus.10846.10846.3 | 3 | 10.69 | 1 | 2.09E+06 | (RI)QAQVEY(R)Q(A)EYV(G)E L G K V(R)R                 | 112.88 | 447.9206 | 1341.748 | -0.0012 | -0.9  | 6.14 | 56607.4  | 5.37 HUMAN | F8V84A | Keratin, type II cytoskeletal 8                              |
| 8939 | dirMS_041712_NAR_30mM_minus.15845.15871.2  | 3 | 10.69 | 0 | 2.33E+04 | (K)M(L)Y(T)E(K)M(L)I(V)T(V)Y(R)R                     | 139.67 | 563.2971 | 1125.597 | -0.0103 | -9.2  | 5.75 | 51636.5  | 5.68 HUMAN | F7EJ23 | Rab GDP dissociation inhibitor beta                          |
| 8940 | dirMS_041712_NAR_40mM_minus.10541.10541.3  | 3 | 10.69 | 1 | 1.70E+06 | (K)TTE(L)EYV(K)T(T)E(L)EYV(Q)S(D)T E L R V(K)A(K)I   | 107.16 | 547.2523 | 1580.269 | -0.0051 | -3.1  | 4.93 | 17271.6  | 6.25 HUMAN | B2R2CS | Actinin, alpha 2, isoform CRA_b                              |
| 8941 | dirMS_041712_NAR_60mM_minus.11426.11426.3  | 3 | 10.69 | 0 | 1.65E+05 | (RI)E(L)EYV(R)E(L)EYV(T)E K E F(A)K(A)               | 123.82 | 400.5662 | 1195.688 | -0.0041 | -3.4  | 4.79 | 272689.3 | 5.79 HUMAN | O1S200 | Spectrin beta chain, non-erythrocytic 2                      |
| 8942 | dirMS_041712_NAR_120mM_plus.6367.6367.2    | 3 | 10.69 | 1 | 3.44E+05 | (K)D(S)YV(G)K(S)YV(I)G G E(A)Q(S)K(R)G               | 86.3   | 677.815  | 1354.623 | -0.0006 | -0.5  | 4.56 | 32616.5  | 5.18 HUMAN | ANL7L6 | Actin, alpha skeletal muscle                                 |
| 8943 | dirMS_041712_NAR_20mM_plus.11425.11425.2   | 3 | 10.69 | 0 | 2.15E+05 | (RI)YV(L)YD(R)R(A)I)YV(L)D)T)E(T)E(K)I               | 151.13 | 669.3157 | 1337.266 | -0.0019 | -1.4  | 4.37 | 22956    | 8.8 HUMAN  | EP9K25 | Cofilin-1                                                    |
| 8944 | dirMS_041712_NAR_20mM_plus.18826.18826.2   | 3 | 10.69 | 0 | 2.00E+05 | (K)IYV(E)T(K)I(S)E A I V(E)T(V)A)Y(L)R(L)R           | 200.32 | 594.3625 | 1185.72  | -0.0024 | -2    | 5.66 | 56386.7  | 5.47 HUMAN | B4D0R8 | T-complex protein 1 subunit gamma                            |
| 8945 | dirMS_041712_NAR_20mM_plus.8987.8987.2     | 3 | 10.69 | 0 | 2.15E+05 | (K)IYV(L)YD(R)R(A)I)YV(L)D)T)E(T)E(K)I               | 132.62 | 594.3625 | 1185.72  | -0.0026 | -0.4  | 4.17 | 57391.2  | 6.45 HUMAN | O43175 | 4-phosphoglycerate dehydrogenase                             |
| 8946 | dirMS_041712_NAR_30mM_plus.6813.6813.2     | 3 | 10.69 | 0 | 1.50E+05 | (K)IYV(L)YD(R)R(A)I)YV(L)D)T)E(T)E(K)I               | 90.48  | 443.2607 | 885.515  | -0.0011 | -1.3  | 9.72 | 63613.4  | 7.9 HUMAN  | B3K0I2 | Protein transport protein Sec23A                             |
| 8947 | dirMS_041712_NAR_40mM_plus.15255.15255.3   | 3 | 10.69 | 0 | 4.85E+05 | (K)IYV(L)YD(R)R(A)I)YV(L)D)T)E(T)E(K)I               | 156.65 | 574.3118 | 1270.927 | -0.0006 | -3.5  | 5.21 | 138084.9 | 5.52 HUMAN | BQ8VPE | Cullin-associated NEDD8-dissociated protein 1                |
| 8948 | dirMS_041712_NAR_40mM_plus.19224.19224.3   | 3 | 10.69 | 0 | 1.61E+06 | (R)IAGP(R)K(R)G K G K P C A C T I N 2 M L S M I K(K) | 160.83 | 626.3273 | 1876.969 | -0.0024 | -1.1  | 8.64 | 18466.1  | 5.78 HUMAN | H3B5U3 | Pyruvate kinase (Fragment)                                   |
| 8949 | dirMS_041712_NAR_50mM_plus.13694.13694.3   | 3 | 10.69 | 0 | 4.46E+05 | (K)IYV(L)YD(R)R(A)I)YV(L)D)T)E(T)E(K)I               | 140.13 | 541.2961 | 1639.888 | -0.0004 | -0.3  | 5.32 | 53513.66 | 6.01 HUMAN | Q14204 | Cytoplasmic dynein 1 heavy chain 1                           |
| 8950 | dirMS_041712_NAR_50mM_plus.18526.18526.3   | 3 | 10.69 | 0 | 4.12E+05 | (R)IYV(L)YD(R)R(A)I)YV(L)D)T)E(T)E(K)I               | 165.83 | 601.3347 | 1801.996 | -0.0004 | -3.5  | 8.73 | 24482.9  | 7.96 HUMAN | B1A1AS | Phosphoribosyl pyrophosphate synthetase 1                    |
| 8951 | dirMS_041712_NAR_50mM_plus.6434.6434.3     | 3 | 10.69 | 1 | 1.31E+05 | M365M                                                | 98.88  | 495.9283 | 1469.778 | -0.0028 | -1.8  | 6.07 | 73386.6  | 5.73 HUMAN | B4DXX7 | ATP-dependent RNA helicase DDX3Y                             |
| 8952 | dirMS_041712_NAR_30mM_plus.7430.7430.3     | 3 | 10.69 | 1 | 1.93E+06 | (R)IYV(L)YD(R)R(A)I)YV(L)D)T)E(T)E(K)I               | 96.8   | 452.5501 | 1356.632 | -0.0032 | -2.4  | 4.41 | 76262.2  | 9.53 HUMAN | P23246 | Splicing factor, proline- and glutamine-rich                 |
| 8953 | dirMS_041712_NAR_60mM_plus.9203.9203.3     | 3 | 10.69 | 1 | 9.40E+05 | (K)IYV(L)YD(R)R(A)I)YV(L)D)T)E(T)E(K)I               | 106.28 | 493.9698 | 1479.711 | -0.0034 | -2.3  | 8.38 | 11854.4  | 6.57 HUMAN | P93849 | Protein S100-A11                                             |
| 8954 | dirMS_041712_NAR_120mM_minus.18580.18580.3 | 3 | 10.68 | 1 | 3.30E+05 | (R)IYV(L)YD(R)R(A)I)YV(L)D)T)E(T)E(K)I               | 156.88 | 514.9175 | 1542.737 | -0.0001 | 0.7   | 4.68 | 25598.3  | 6.45 HUMAN | E7E911 | Heat shock 70 kDa protein 1A/1B                              |
| 8955 | dirMS_041712_NAR_120mM_minus.936.9640.3    | 3 | 10.68 | 0 | 1.70E+06 | (K)E(F)H(L)N(L)E K F M L E N F S G D P P S S(K)      | 106.18 | 482.8881 | 1446.65  | 0.0002  | 0.1   | 6.65 | 30992.3  | 4.14 HUMAN | B2R8E8 | Protein SET                                                  |
| 8956 | dirMS_041712_NAR_30mM_minus.13386.13386.2  | 3 | 10.68 | 0 | 2.45E+05 | (K)IYV(L)YD(R)R(A)I)YV(L)D)T)E(T)E(K)I               | 126.23 | 584.7961 | 1168.6   | -0.0148 | -12.6 | 6    | 58214.7  | 5.25 HUMAN | B4DEM7 | T-complex protein 1 subunit theta                            |
| 8957 | dirMS_041712_NAR_30mM_minus.13437.13437.2  | 3 | 10.68 | 0 | 2.45E+05 | (K)IYV(L)YD(R)R(A)I)YV(L)D)T)E(T)E(K)I               | 126.23 | 584.7961 | 1168.6   | -0.0148 | -12.6 | 6    | 58214.7  | 5.25 HUMAN | B4DEM7 | T-complex protein 1 subunit theta                            |
| 8958 | dirMS_041712_NAR_30mM_minus.18944.18944.2  | 3 | 10.68 | 0 | 1.92E+05 | (K)IYV(L)YD(R)R(A)I)YV(L)D)T)E(T)E(K)I               | 108.66 | 495.9402 | 1780.892 | -0.0004 | -0.4  | 4.14 | 123097.1 | 5.83 HUMAN | AS430I | POE ankyrin domain family member F                           |
| 8959 | dirMS_041712_NAR_30mM_minus.19743.19743.2  | 3 | 10.68 | 0 | 3.53E+04 | (K)IYV(L)YD(R)R(A)I)YV(L)D)T)E(T)E(K)I               | 164.27 | 587.8058 | 1174.604 | -0.0006 | 0.5   | 6.1  | 104488.6 | 5.36 HUMAN | B2R2CS | Actinin, alpha 2, isoform CRA_b                              |
| 8960 | dirMS_041712_NAR_30mM_minus.7031.7031.2    | 3 | 10.68 | 0 | 3.20E+05 | (R)IYV(L)YD(R)R(A)I)YV(L)D)T)E(T)E(K)I               | 92.85  | 538.2398 | 1075.469 | -0.0032 | -3    | 4.37 | 40616.6  | 9.46 HUMAN | HYH18H | Protein phosphatase 1 regulatory subunit 12A (Fragment)      |
| 8961 | dirMS_041712_NAR_50mM_minus.11578.11578.3  | 3 | 10.68 | 1 | 5.14E+05 | (K)IYV(L)YD(R)R(A)I)YV(L)D)T)E(T)E(K)I               | 133.45 | 511.6179 | 1532.835 | -0.0039 | -2.5  | 5.96 | 57204.9  | 6.01 HUMAN | F5G0V6 | T-complex protein 1 subunit beta                             |
| 8962 | dirMS_041712_NAR_50mM_minus.14717.14717.3  | 3 | 10.68 | 1 | 1.84E+05 | (K)IYV(L)YD(R)R(A)I)YV(L)D)T)E(T)E(K)I               | 121.1  | 484.9233 | 1404.783 | -0.0011 | -1.4  | 4.14 | 57204.9  | 6.01 HUMAN | F5G0V6 | T-complex protein 1 subunit beta                             |
| 8963 | dirMS_041712_NAR_50mM_minus.6953.6953.3    | 3 | 10.68 | 1 | 3.77E+04 | (K)IYV(L)YD(R)R(A)I)YV(L)D)T)E(T)E(K)I               | 106.17 | 590.9708 | 1170.923 | -0.0254 | -14.3 | 4.79 | 22655.1  | 9.45 HUMAN | O898R8 | Partner of Y14 and mago                                      |
| 8964 | dirMS_041712_NAR_60mM_minus.13182.13208.3  | 3 | 10.68 | 0 | 5.10E+05 | (K)IYV(L)YD(R)R(A)I)YV(L)D)T)E(T)E(K)I               | 133.45 | 486.2642 | 1456.78  | -0.0014 | -1    | 6.75 | 52843.5  | 5.17 HUMAN | B751J0 | T-complex protein 1 subunit delta                            |
| 8965 | dirMS_041712_NAR_60mM_minus.8533.8533.3    | 3 | 10.68 | 1 | 5.78E+04 | (K)IYV(L)YD(R)R(A)I)YV(L)D)T)E(T)E(K)I               | 107.3  | 598.2923 | 1786.845 | -0.0017 | 9.5   | 4.08 | 19284.3  | 6.23 HUMAN | G3V3C7 | DNA-(apurinic or pyrimidinic site) lyase (Fragment)          |
| 8966 | dirMS_041712_NAR_60mM_minus.15336.15373.3  | 3 | 10.68 | 1 | 1.62E+05 | (K)IYV(L)YD(R)R(A)I)YV(L)D)T)E(T)E(K)I               | 133.88 | 502.5857 | 1558.751 | -0.0025 | -1.7  | 4.37 | 62040.3  | 5.93 HUMAN | B2R2CS | Actinin, alpha 2, isoform CRA_b                              |
| 8967 | dirMS_041712_NAR_120mM_plus.18611.18611.4  | 4 | 10.68 | 1 | 4.71E+05 | (R)IYV(L)YD(R)R(A)I)YV(L)D)T)E(T)E(K)I               | 150.38 | 497.0291 | 1865.097 | -0.0021 | -1.1  | 8.31 | 141718.6 | 7.8 HUMAN  | BW043  | Valine--RNA ligase                                           |
| 8968 | dirMS_041712_NAR_120mM_plus.7412.7412.3    | 3 | 10.68 | 1 | 1.14E+06 | (R)IYV(L)YD(R)R(A)I)YV(L)D)T)E(T)E(K)I               | 92.32  | 457.5737 | 1370.702 | -0.0043 | -3.1  | 6.17 | 180453.7 | 6.04 HUMAN | HYH102 | YLP motif-containing protein 1 (Fragment)                    |
| 8969 | dirMS_041712_NAR_120mM_plus.8510.8510.3    | 3 | 10.68 | 0 | 1.29E+04 | (K)IYV(L)YD(R)R(A)I)YV(L)D)T)E(T)E(K)I               | 97.3   | 405.188  | 1213.542 | -0.0076 | -6.2  | 5.3  | 160853.1 | 6.11 HUMAN | F8VU15 | YLP motif-containing protein 1                               |
| 8970 | dirMS_041712_NAR_120mM_plus.9595.9595.3    | 3 | 10.68 | 0 | 6.08E+05 | (K)IYV(L)YD(R)R(A)I)YV(L)D)T)E(T)E(K)I               | 104.03 | 584.579  | 1691.726 | -0.0031 | -1.9  | 4.22 | 69932.8  | 5.37 HUMAN | EP9E43 | Heat shock cognate 71 kDa protein                            |
| 8971 | dirMS_041712_NAR_20mM_plus.13975.13975.2   | 3 | 10.68 | 0 | 1.85E+05 | M589M                                                | 167.67 | 683.2671 | 1349.735 | -0.0024 | -1.8  | 5.5  | 20151.2  | 4.58 HUMAN | G3V308 | Heat shock protein HSP 90-alpha (Fragment)                   |
| 8972 | dirMS_041712_NAR_20mM_plus.8869.8869.3     | 3 | 10.68 | 0 | 1.55E+04 | (K)IYV(L)YD(R)R(A)I)YV(L)D)T)E(T)E(K)I               | 131.57 | 442.5729 | 1325.706 | -0.0058 | -1.4  | 4.53 | 73202    | 9.19 HUMAN | C9JMU5 | Probable ATP-dependent RNA helicase DDX17                    |
| 8973 | dirMS_041712_NAR_30mM_plus.17632.17632.2   | 3 | 10.68 | 0 | 3.10E+05 | (K)IYV(L)YD(R)R(A)I)YV(L)D)T)E(T)E(K)I               | 145.7  | 610.3003 | 1219.559 | -0.0014 | -4.4  | 4.14 | 61161.1  | 4.34 HUMAN | Y7E1L7 | Glucosidase 2 subunit beta                                   |
| 8974 | dirMS_041712_NAR_30mM_plus.2723.7369.2     | 3 | 10.68 | 0 | 1.31E+06 | (R)IYV(L)YD(R)R(A)I)YV(L)D)T)E(T)E(K)I               | 92.9   | 480.759  | 960.511  | -0.0022 | -0.2  | 5.81 | 61224.7  | 5.7 HUMAN  | P10809 | 60 kDa heat shock protein, mitochondrial                     |
| 8975 | dirMS_041712_NAR_30mM_plus.7377.7377.3     | 3 | 10.68 | 0 | 1.09E+05 | (K)IYV(L)YD(R)R(A)I)YV(L)D)T)E(T)E(K)I               | 92.9   | 480.759  | 960.511  | -0.0022 | -0.2  | 5.81 | 61224.7  | 5.7 HUMAN  | P10809 | 60 kDa heat shock protein, mitochondrial                     |
| 8976 | dirMS_041712_NAR_30mM_plus.2897.2897.2     | 3 | 10.68 | 0 | 1.86E+05 | M154M                                                | 102.68 | 517.1881 | 960.511  | -0.0022 | -1.6  | 5.17 | 65763.5  | 5.17 HUMAN | B2R2CS | Actinin, alpha 2, isoform CRA_b                              |
| 8977 | dirMS_041712_NAR_40mM_plus.12837.12837.3   | 3 | 10.68 | 0 | 4.88E+05 | (R)IYV(L)YD(R)R(A)I)YV(L)D)T)E(T)E(K)I               | 102.68 | 517.1881 | 960.511  | -0.0022 | -1.6  | 5.17 | 65763.5  | 5.17 HUMAN | B2R2CS | Actinin, alpha 2, isoform CRA_b                              |
| 8978 | dirMS_041712_NAR_20mM_plus.13466.13466.3   | 3 | 10.68 | 0 | 6.01E+05 | (R)IYV(L)YD(R)R(A)I)YV(L)D)T)E(T)E(K)I               | 145.08 | 665.8807 | 1995.051 | -0.0023 | -11.5 | 5.4  | 558007.1 | 5.44 HUMAN | PS8107 | Epipkalin                                                    |
| 8979 | dirMS_041712_NAR_20mM_plus.8044.8044.2     | 3 | 10.68 | 0 | 2.31E+05 | (K)IYV(L)YD(R)R(A)I)YV(L)D)T)E(T)E(K)I               | 108.22 | 443.7518 | 986.499  | -0.0029 | -1.1  | 4.21 | 23795.6  | 9.89 HUMAN | C9E217 | Non-POU domain-containing actanin-binding protein (Fragment) |
| 8980 | dirMS_041712_NAR_50mM_plus.13566.13566.3   | 3 | 10.68 | 1 | 1.88E+06 | (R)IYV(L)YD(R)R(A)I)YV(L)D)T)E(T)E(K)I               | 140    | 543.3085 | 1627.913 | -0.0016 | -1    | 8.75 | 17973    | 5.16 HUMAN | EP9E65 | Heat shock cognate 71 kDa protein (Fragment)                 |
| 8981 | dirMS_041712_NAR_50mM_plus.15505.15505.3   | 3 | 10.68 | 1 | 7.67E+05 | (K)IYV(L)YD(R)R(A)I)YV(L)D)T)E(T)E(K)I               | 150.35 | 639.6848 | 1917.044 | -0.0042 | -2.2  | 6.04 | 46550.7  | 7.81 HUMAN | B72CJ9 | Chaperonin containing TCP1, subunit 7 (Eta), isoform CRA_a   |
| 8982 | dirMS_041712_NAR_50mM_plus.9011.9011.3     | 3 | 10.68 | 1 | 3.60E+05 | (K)IYV(L)YD(R)R(A)I)YV(L)D)T)E(T)E(K)I               | 114.93 | 442.9211 | 1326.72  | -0.0019 | -1.4  | 8.41 | 50199.4  | 4.75 HUMAN | AN6N22 | Tubulin beta 8-chain-like protein LOC260334                  |
| 8983 | dirMS_041712_NAR_50mM_plus.18596.18596.3   | 3 | 10.68 | 1 | 6.82E+05 | (R)IYV(L)YD(R)R(A)I)YV(L)D)T)E(T)E(K)I               | 154.38 | 567.3254 | 1699.957 | -0.0005 | -5    | 8.75 | 63136.9  | 5.83 HUMAN |        |                                                              |

|      |                                            |   |       |           |       |                                                      |                           |         |        |          |          |         |       |      |          |             |        |                                                                     |
|------|--------------------------------------------|---|-------|-----------|-------|------------------------------------------------------|---------------------------|---------|--------|----------|----------|---------|-------|------|----------|-------------|--------|---------------------------------------------------------------------|
| 9043 | dirMS_041712_NAR_50mM_minus.8601.8601.3    | 3 | 10.64 | 0.165E+05 | M180m | (R)VVVLMR(RV VVQ/Lm G S/T S D/J G H C K E))          | C.Carbonbamidomethylation | in Oxid | 117.55 | 583.2829 | 1731.84  | 15.9937 | -0.7  | 5.32 | 37681.5  | 5.93 HUMAN  | DRF662 | Phosphoribosylaminimidazole carboxylase                             |
| 9044 | dirMS_041712_NAR_50mM_minus.17607.17607.3  | 3 | 10.64 | 1.427E+06 |       | (K)YFTEFLR(RV)S/V/E L/F A D A V/P R(K)               |                           |         | 157.75 | 460.9911 | 1379.757 | 0.018   | 1.3   | 6.04 | 13378.8  | 6.27 HUMAN  | CJ9557 | Peptidyl-prolyl cis-trans isomerase                                 |
| 9045 | dirMS_041712_NAR_120mM_plus.12306.10380.2  | 2 | 10.64 | 6.376E+05 |       | (K)HSDMND(K)K V G/L V L V D/V A N(K)                 |                           |         | 162.93 | 702.8524 | 1404.7   | -0.003  | -2.1  | 3.93 | 22029.9  | 10.62 HUMAN | AM0U53 | Thioreson-dependent peroxide reductase, mitochondrial               |
| 9046 | dirMS_041712_NAR_120mM_plus.6810.6924.3    | 3 | 10.64 | 5.07E+05  |       | (K)SFDSD(K)S Q I/S F D/N/P V/D R(K)                  |                           |         | 189.58 | 436.2209 | 1306.339 | 0.005   | 7.3   | 5.68 | 13194    | 9.99 HUMAN  | E9P70  | Chitinase domain-containing protein 1 (Fragment)                    |
| 9047 | dirMS_041712_NAR_20mM_plus.15841.15859.2   | 2 | 10.64 | 1.24E+05  |       | (R)GTPLSP(R)G T/P L/P/S L/P L(K)                     |                           |         | 180.99 | 519.8306 | 1038.656 | -0.008  | -1.8  | 8.78 | 276046.1 | 6.01 HUMAN  | FA9327 | Fatty acid synthase                                                 |
| 9048 | dirMS_041712_NAR_20mM_plus.18859.18859.9   | 2 | 10.64 | 0.288E+05 |       | (K)TAVETA(K)T A/V/E/L/V L/L L(R)                     |                           |         | 189.59 | 593.3625 | 1185.72  | -0.024  | -2    | 5.66 | 56186.7  | 5.47 HUMAN  | BA4UB8 | T-complex protein 1 subunit gamma                                   |
| 9049 | dirMS_041712_NAR_30mM_plus.10380.10380.2   | 2 | 10.64 | 2.09E+05  |       | (R)YVFEAK(R)K V/E/E/A T A R(K)                       |                           |         | 125.23 | 478.7638 | 985.62   | 0.009   | -2    | 4.25 | 42751    | 7.91 HUMAN  | 672264 | T-complex protein 1 subunit delta                                   |
| 9050 | dirMS_041712_NAR_30mM_plus2.6120.6120.2    | 2 | 10.64 | 4.34E+05  | M23m  | (R)KLEGTVEK(L)G/T/V m/R(M)                           |                           |         | 86.22  | 411.2138 | 805.424  | 15.967  | 2.1   | 6.1  | 16439    | 4.08 HUMAN  | C31779 | Tropoin C type 2 (Fast), isoform CRA_a                              |
| 9051 | dirMS_041712_NAR_40mM_plus2.19051.19051.3  | 3 | 10.64 | 2.98E+05  |       | (R)YDLHLR(R)D Y L H/LV/P E/V/P V/T A R(R)            |                           |         | 178.12 | 578.6565 | 1733.959 | -0.003  | -2    | 5.32 | 19924.8  | 9.99 HUMAN  | F6U211 | 40S ribosomal protein S10                                           |
| 9052 | dirMS_041712_NAR_50mM_plus2.12522.12522.3  | 3 | 10.64 | 1.24E+05  |       | (R)SVLEFL(R)S V/E/L/A/N/P T Q/D L V L(K)             |                           |         | 133.58 | 628.6368 | 1583.9   | -0.005  | -2.8  | 5.79 | 198852.6 | 5.95 HUMAN  | AN6K71 | RanBP2-like and GRP domain-containing protein 3                     |
| 9053 | dirMS_041712_NAR_50mM_plus2.2262.2262.3    | 3 | 10.64 | 1.135E+06 |       | (K)SGGLGR(K)G G L/G L(P)A/N/P L A D V D T R R(L)     |                           |         | 191    | 631.029  | 1893.076 | -0.045  | -1.9  | 6.17 | 15252.2  | 5.82 HUMAN  | AH0V05 | Peroxiredoxin 2, isoform CRA_a                                      |
| 9054 | dirMS_041712_NAR_50mM_plus2.8952.8952.3    | 3 | 10.64 | 7.85E+05  |       | 117K02G7(K)K V G/L V L V D/V A N(K)                  |                           |         | 117    | 628.6368 | 1489.83  | -0.003  | -1.8  | 8.59 | 204389   | 6.06 HUMAN  | Q43809 | Cleavage and polyadenylation specificity factor subunit 5           |
| 9055 | dirMS_041712_NAR_60mM_plus.7692.7692.3     | 3 | 10.64 | 9.11E+05  |       | (K)FLFCEC(K)I/L/E Q/E C/P/H/S T D R(V)               |                           |         | 98.37  | 517.2234 | 1549.652 | 0.004   | 2.2   | 5.32 | 51260.6  | 5.39 HUMAN  | PE1978 | Heterogeneous nuclear ribonucleoprotein K                           |
| 9056 | dirMS_041712_NAR_120mM_minus.17087.17087.3 | 3 | 10.63 | 1.452E+05 |       | (R)RJRGTE(L)R R G E T A G V L I I G L R(V)           |                           |         | 148.32 | 452.2751 | 1354.816 | -0.058  | -4.3  | 9.6  | 20631.5  | 6.98 HUMAN  | DR6AX2 | C-terminal-binding protein 1 (Fragment)                             |
| 9057 | dirMS_041712_NAR_30mM_minus2.14846.14905.2 | 2 | 10.63 | 7.09E+04  |       | (R)MSPFAR(R)M S/P/E A L R(R)                         |                           |         | 134.48 | 458.753  | 916.492  | 0.007   | 7.3   | 5.75 | 266161   | 5.68 HUMAN  | E9PPU0 | Epipkalin                                                           |
| 9058 | dirMS_041712_NAR_30mM_minus.15969.15969.2  | 2 | 10.63 | 4.13E+05  |       | (K)NLLVLR(R) L/L V A/V R(G)                          |                           |         | 139.73 | 417.778  | 828.551  | -0.009  | -10.9 | 9.75 | 193179.8 | 5.48 HUMAN  | Q06310 | Clathrin heavy chain 1                                              |
| 9059 | dirMS_041712_NAR_50mM_minus2.15315.15315.3 | 3 | 10.63 | 5.45E+05  |       | (R)DGLAFR(R)D G L A/L R/F A/V R(H/R)                 |                           |         | 155.45 | 409.5504 | 1226.664 | -0.004  | -0.3  | 6.74 | 146974   | 5.55 HUMAN  | C319R8 | Spectrin beta chain, non-erythrocytic 4                             |
| 9060 | dirMS_041712_NAR_60mM_minus.8748.8749.3    | 3 | 10.63 | 1.200E+06 | M227m | (R)mQKFEK(R)M Q K E I/V T A/L I A P S T A N(K))      |                           |         | 109.63 | 527.6044 | 1548.812 | 31.962  | -2.3  | 8.35 | 32616.5  | 5.18 HUMAN  | AN6L76 | Actin, alpha skeletal muscle                                        |
| 9061 | dirMS_041712_NAR_120mM_plus.4076.4309.3    | 3 | 10.63 | 1.173E+07 | M310m | (R)TKTTESE(R)T KV EY I/S I/M R(NK)                   |                           |         | 69.83  | 408.8687 | 1208.594 | 15.9796 | 2.2   | 5.81 | 37296.3  | 5.3 HUMAN   | F8VU64 | Keratin, type II cytoskeletal 8                                     |
| 9062 | dirMS_041712_NAR_20mM_plus.13192.13192.2   | 2 | 10.63 | 0.536E+04 |       | (R)LLAPYR(R)LP A/P D/V D A D V A N(K)                |                           |         | 162.93 | 702.8524 | 1404.7   | -0.003  | -2.1  | 3.93 | 22029.9  | 10.62 HUMAN | AM0U53 | 60S ribosomal protein L23a                                          |
| 9063 | dirMS_041712_NAR_20mM_plus.14940.14940.2   | 2 | 10.63 | 1.26E+05  |       | (R)LLDAQE(R)R L/D V A/Q I/S I T G V D/P S(K)         |                           |         | 174.67 | 807.4389 | 1613.874 | 0.004   | 2.5   | 4.21 | 533778   | 5.74 HUMAN  | Q15149 | Plectin                                                             |
| 9064 | dirMS_041712_NAR_20mM_plus.17518.17518.2   | 2 | 10.63 | 0.336E+04 |       | (R)YLVTAAR(R)I/T V A/V F R(G)                        |                           |         | 192.65 | 520.3009 | 1039.593 | 0.001   | 1     | 8.75 | 40069.4  | 4.83 HUMAN  | E7EWR1 | Tubulin beta chain                                                  |
| 9065 | dirMS_041712_NAR_20mM_plus.17824.17824.2   | 2 | 10.63 | 0.151E+05 |       | (R)TVDSLS(R)T V I/S Q/L/E/D L/D/S M(K)               |                           |         | 194.8  | 753.8776 | 1506.747 | -0.001  | 0.7   | 4.03 | 43773.3  | 5.26 HUMAN  | F8V219 | Keratin, type I cytoskeletal 18                                     |
| 9066 | dirMS_041712_NAR_20mM_plus.7006.7006.2     | 2 | 10.63 | 4.30E+05  |       | (R)VDAGTR(R)I Q/E I A G T V V V(K)                   |                           |         | 107.67 | 517.2234 | 1073.584 | -0.018  | -1.7  | 4.53 | 31330.8  | 9.26 HUMAN  | E9P0R2 | Malate dehydrogenase, mitochondrial                                 |
| 9067 | dirMS_041712_NAR_20mM_plus.7391.7391.2     | 2 | 10.63 | 2.88E+05  |       | (R)TGKQPK(R)K T G Q/V L V D/V A N(K)                 |                           |         | 125.82 | 714.8394 | 1428.675 | -0.009  | -2.7  | 8.16 | 11447.2  | 9.81 HUMAN  | CJ9F77 | Cytochrome c (Fragment)                                             |
| 9068 | dirMS_041712_NAR_20mM_plus.9868.9868.2     | 2 | 10.63 | 0.534E+05 |       | (R)SVYNYE(R)S/V/Y/V I/E A/T G K V(G)                 |                           |         | 138.6  | 651.3211 | 1301.637 | -0.003  | -1.8  | 6    | 27549.9  | 4.39 HUMAN  | E9PRU4 | Tubulin beta chain                                                  |
| 9069 | dirMS_041712_NAR_30mM_plus2.19983.20242.2  | 2 | 10.63 | 2.43E+05  |       | (K)LYLNF(L)K V I/N L V L(K)                          |                           |         | 159.32 | 455.7738 | 910.54   | 0.007   | 0.7   | 8.59 | 41666    | 7.73 HUMAN  | E9P0Q8 | Succinyl-CoA ligase (GDP-forming) subunit beta, mitochondrial       |
| 9070 | dirMS_041712_NAR_30mM_plus2.8451.8572.2    | 2 | 10.63 | 0.832E+05 |       | (R)FSLTAE(R)F/S I/E/L/A/E K(L)                       |                           |         | 99.32  | 462.7408 | 924.467  | 0.007   | 7.6   | 4.53 | 49992    | 5.86 HUMAN  | BA4D08 | T-complex protein 1 subunit epsilon                                 |
| 9071 | dirMS_041712_NAR_30mM_plus2.1217.1217.2    | 2 | 10.63 | 6.30E+05  |       | (R)YVFEAK(R)K V/E/E/A T A R(K)                       |                           |         | 125.23 | 478.7638 | 985.62   | 0.009   | -2    | 4.25 | 42751    | 7.91 HUMAN  | 672264 | T-complex protein 1 subunit delta                                   |
| 9072 | dirMS_041712_NAR_30mM_plus2.18008.18008.3  | 3 | 10.63 | 7.29E+05  |       | (K)NSVSN(K)T V/S G/V N/G P/L V D/V A N(K)            |                           |         | 109.33 | 549.9834 | 1647.943 | -0.007  | -4.4  | 6.41 | 6931     | 10.41 HUMAN | E9SHV6 | V-type proton ATPase subunit B, brain isoform                       |
| 9073 | dirMS_041712_NAR_60mM_plus.14724.14724.3   | 3 | 10.63 | 1.533E+05 |       | (R)JELAVQ(R)R L A/V Z/ V Y E A R(K)/F)               |                           |         | 133.62 | 483.5949 | 1448.774 | -0.042  | -2.9  | 4.79 | 73386.6  | 8.73 HUMAN  | DA0X77 | ATP-dependent RNA helicase DDX3Y                                    |
| 9074 | dirMS_041712_NAR_30mM_plus.19917.19917.3   | 3 | 10.63 | 1.153E+05 |       | (R)GMRLRE(R)M G/L R/E D/V A/L I Y E L(K)             |                           |         | 115.27 | 512.941  | 1538.809 | -0.003  | -0.2  | 4.68 | 67933    | 6.08 HUMAN  | P26038 | Moesin                                                              |
| 9075 | dirMS_041712_NAR_30mM_plus.7182.7182.3     | 3 | 10.63 | 4.38E+04  |       | (K)YVFEAK(R)K V/E/E/A T A R(K)                       |                           |         | 95.72  | 471.9371 | 914.32   | -0.003  | -1.8  | 6.33 | 31751.6  | 6.33 HUMAN  | F8V277 | Keratin, type I cytoskeletal protein 26a                            |
| 9076 | dirMS_041712_NAR_120mM_minus.4517.4517.2   | 2 | 10.62 | 7.35E+05  |       | (R)HSDND(R)R S/D G L N/C V/L V D/V A N(K)            |                           |         | 73.95  | 515.2423 | 1029.478 | -0.009  | -0.9  | 6.74 | 7781.8   | 6.82 HUMAN  | E9P220 | Signal recognition particle 9 kDa protein                           |
| 9077 | dirMS_041712_NAR_30mM_minus2.11343.11399.2 | 2 | 10.62 | 2.19E+05  |       | (K)ATAVM(R)K A T V A I/M P D/G Q K(D)                |                           |         | 115.47 | 582.7922 | 1164.572 | 0.0054  | 4.6   | 5.88 | 22382    | 8.65 HUMAN  | Q06830 | Peroxiredoxin-1                                                     |
| 9078 | dirMS_041712_NAR_30mM_minus2.15791.15791.2 | 2 | 10.62 | 1.125E+05 |       | (R)TINEVE(R)T I/M E I/V E I/L V L T R(D)             |                           |         | 139.6  | 715.3834 | 1429.765 | -0.005  | -3.5  | 4.53 | 107710.1 | 5.18 HUMAN  | B77V16 | Actinin alpha 1 isoform 3                                           |
| 9079 | dirMS_041712_NAR_30mM_minus2.17616.17616.2 | 2 | 10.62 | 1.171E+05 |       | (K)FGIDVQ(K)F L V I/J V G P P R(K)                   |                           |         | 150.27 | 519.2752 | 1037.62  | 0.017   | 1.6   | 5.83 | 15567.5  | 5.13 HUMAN  | HK0H46 | Adenylate kinase isoenzyme 1 (Fragment)                             |
| 9080 | dirMS_041712_NAR_40mM_minus2.14651.14651.3 | 3 | 10.62 | 5.38E+05  |       | (R)HFLP(R)R I/F F V A/I T V A/P I A S E(K)           |                           |         | 187.61 | 586.3246 | 1756.963 | 0.004   | -2.9  | 6.75 | 49012.3  | 4.48 HUMAN  | AB0118 | Tubulin alpha-4A chain                                              |
| 9081 | dirMS_041712_NAR_50mM_minus2.8335.8335.3   | 3 | 10.62 | 1.712E+04 |       | (K)NVSSE(L)K N V/S E L E D R T P E V S(K)            |                           |         | 115.6  | 567.289  | 1699.85  | 0.027   | 1.6   | 4.41 | 136658.9 | 5.13 HUMAN  | Q15393 | Splicing factor 3B subunit 3                                        |
| 9082 | dirMS_041712_NAR_60mM_minus.10138.10138.3  | 3 | 10.62 | 1.593E+05 |       | (R)YVFEAK(R)K V/E/E/A T A R(K)                       |                           |         | 116.62 | 541.6051 | 1622.802 | -0.013  | -0.8  | 4.32 | 258215.9 | 5.48 HUMAN  | F7E9N5 | Filamin-B                                                           |
| 9083 | dirMS_041712_NAR_60mM_minus2.14423.14423.3 | 3 | 10.62 | 0.171E+05 |       | (R)FCEAHR(R)E A/H L A N/D F/E/L A/R(G)               |                           |         | 139.9  | 913.5414 | 1541.771 | -0.122  | -7.9  | 4.65 | 52088.9  | 5.35 HUMAN  | Q02790 | Peptidyl-prolyl cis-trans isomerase FKBP4                           |
| 9084 | dirMS_041712_NAR_120mM_plus.1232.1232.2    | 2 | 10.62 | 0.870E+05 |       | (R)YVFEAK(R)K V/E/E/A T A R(K)                       |                           |         | 125.23 | 478.7638 | 985.62   | 0.009   | -2    | 4.25 | 42751    | 7.91 HUMAN  | 672264 | T-complex protein 1 subunit delta                                   |
| 9085 | dirMS_041712_NAR_120mM_plus.7040.7040.2    | 2 | 10.62 | 4.26E+05  |       | (K)SFDSD(K)S Q I/S F D/N/P V/D R(K)                  |                           |         | 190.53 | 436.2209 | 1306.339 | 0.005   | 7.3   | 5.68 | 13194    | 9.99 HUMAN  | E9P70  | Chitinase domain-containing protein 1 (Fragment)                    |
| 9086 | dirMS_041712_NAR_120mM_plus.7923.7923.4    | 4 | 10.62 | 0.671E+04 |       | (K)AVVTHS(K)A V I/V T/H/S Q S H G G A L T Y A A L(K) |                           |         | 106.4  | 478.6473 | 911.967  | -0.008  | -2.8  | 8.65 | 11029.5  | 9.89 HUMAN  | IL3L30 | Serine racemase (Fragment)                                          |
| 9087 | dirMS_041712_NAR_20mM_plus.17448.17448.3   | 3 | 10.62 | 0.234E+05 | M90m  | (R)FLVYDQ(R)F V G N L/P A/P D I/T E/E M R(K)         |                           |         | 192.3  | 625.9762 | 1859.921 | 15.9933 | -0.9  | 4    | 23729.5  | 9.89 HUMAN  | CN2U7  | Non-POU domain-containing octamer-binding protein (Fragment)        |
| 9088 | dirMS_041712_NAR_20mM_plus.18174.18174.2   | 2 | 10.62 | 1.70E+05  |       | (R)LTGDLR(K)S L/G L V A/G C V R(K)                   |                           |         | 127.02 | 566.9862 | 1333.789 | -0.040  | -2.6  | 8.7  | 45204.5  | 5.29 HUMAN  | BA4E73 | Selenium-binding protein 1                                          |
| 9089 | dirMS_041712_NAR_20mM_plus.18615.18615.2   | 2 | 10.62 | 2.69E+05  |       | (R)LAVALS(K)A V E/L V S D/V D G L A S R(K)           |                           |         | 200.43 | 793.9214 | 1588.838 | -0.029  | -1.8  | 4.03 | 24286.7  | 4.89 HUMAN  | C31VAT | Creatine kinase B-type (Fragment)                                   |
| 9090 | dirMS_041712_NAR_50mM_plus2.11445.11481.3  | 3 | 10.62 | 0.342E+05 |       | (K)YTVYD(K)K V I/V Q/D E S H S W/D S C V R(K)        |                           |         | 127.98 | 661.2946 | 1981.871 | -0.016  | -0.6  | 4.65 | 33029.4  | 9.62 HUMAN  | D6R100 | Guanine nucleotide-binding protein subunit beta-2-like 1 (Fragment) |
| 9091 | dirMS_041712_NAR_50mM_plus2.19855.19855.3  | 3 | 10.62 | 0.526E+04 |       | (K)IGLCLCE(K)C L/C L/L E Q I D S F P K P R(S)        |                           |         | 172.9  | 634.3344 | 1900.995 | -0.003  | -3.3  | 6.07 | 45336.8  | 9.03 HUMAN  | B72142 | HBS1-like 1                                                         |
| 9092 | dirMS_041712_NAR_50mM_plus2.20075.20075.3  | 3 | 10.62 | 2.78E+05  |       | (R)IGLQSP(R)R I Q/S L/P F A L T H N R(K)             |                           |         | 173.85 | 632.3378 | 1954.931 | 0.073   | -4.6  | 8.76 | 17851.7  | 5.01 HUMAN  |        |                                                                     |



|      |                                            |   |       |   |                |                                                        |        |          |          |         |      |      |          |       |       |                |                                                                        |
|------|--------------------------------------------|---|-------|---|----------------|--------------------------------------------------------|--------|----------|----------|---------|------|------|----------|-------|-------|----------------|------------------------------------------------------------------------|
| 9152 | dirMS_041712_NAR_30mM_minus1.13810.13810.2 | 2 | 10.58 | 0 | 2.26E+05       | (KITYSEVE)(K)T Y(SVIE Y L/P K)                         | 128.3  | 550.2855 | 1099.567 | -0.0033 | -3   | 5.66 | 258215.9 | 5.48  | HUMAN | ETN95          | Flamin-B                                                               |
| 9153 | dirMS_041712_NAR_30mM_minus1.14416.14416.2 | 2 | 10.58 | 0 | 2.40E+05       | (KICCSAG)(K)C I(S/GA/V/V U/K S)                        | 131.97 | 611.3188 | 1221.633 | -0.0027 | -2.2 | 8.75 | 58506.4  | 8.38  | HUMAN | P14618         | Pyruvate kinase isozymes M1/M2                                         |
| 9154 | dirMS_041712_NAR_30mM_minus1.18957.18957.2 | 2 | 10.58 | 0 | 9.01E+05       | (KIVPSFR)(R)E L P S I(PLE/V/S/G A K R)                 | 169.73 | 532.658  | 1588.959 | -0.0064 | -4.1 | 9.37 | 42183.7  | 5.72  | HUMAN | ENSP0000230377 | Protein tubulin beta chain-like protein ENSP0000230377                 |
| 9155 | dirMS_041712_NAR_50mM_minus1.0501.10501.3  | 3 | 10.58 | 0 | 1.12E+05 M271m | (RDLQSYCS)(R) L S Y(L/S/C/G N/V D R R)                 | 140.95 | 544.8966 | 1166.083 | -0.0191 | -1.7 | 5.21 | 46013.4  | 5.38  | HUMAN | PS2597         | Heterogeneous nuclear ribonucleoprotein F                              |
| 9156 | dirMS_041712_NAR_50mM_minus1.12278.12278.3 | 3 | 10.58 | 1 | 1.37E+05       | (R)VFDDKQ)(R) F V D K V G N/G V/A/E A E R(H)           | 137.82 | 585.6286 | 1754.871 | -0.0055 | 0.3  | 4.56 | 21860.1  | 4.45  | HUMAN | ETM83          | Calmodulin                                                             |
| 9157 | dirMS_041712_NAR_50mM_minus1.12884.12884.3 | 3 | 10.58 | 0 | 1.133E+05      | (K)IASJAS)(K) S L I A S L V P R/L H V A K(L)           | 141.37 | 435.2622 | 1303.773 | -0.0021 | -0.9 | 8.8  | 141626   | 5.5   | HUMAN | ABM736         | Dynactin subunit 1                                                     |
| 9158 | dirMS_041712_NAR_50mM_minus1.17738.17738.3 | 3 | 10.58 | 1 | 3.07E+05       | (K)ISPSR)(R) L P S I(PLE/V/S/G A K R)                  | 169.73 | 532.658  | 1588.959 | -0.0064 | -4.1 | 9.37 | 42183.7  | 5.72  | HUMAN | ENSP0000230377 | Mitochondrial import receptor subunit TOM34                            |
| 9159 | dirMS_041712_NAR_60mM_minus1.13955.13957.3 | 3 | 10.58 | 1 | 3.86E+05       | (R)SIJMAN)(R) L I V A N(L)A/A N C Y K R(G)             | 138.28 | 512.9419 | 1536.82  | -0.0091 | -5.9 | 5.97 | 36978.6  | 6.33  | HUMAN | BTZ800         | Adenosine kinase                                                       |
| 9160 | dirMS_041712_NAR_60mM_minus1.14948.14948.3 | 3 | 10.58 | 1 | 3.27E+05 M557m | (K)IMFGID)(K)M F/G I D R D A V/A Q/V R(G)              | 143.58 | 526.9353 | 1562.811 | -0.0086 | -9.1 | 5.71 | 63484.8  | 7.29  | HUMAN | BAE022         | Transketolase                                                          |
| 9161 | dirMS_041712_NAR_120mM_plus1.16051.16371.4 | 4 | 10.58 | 2 | 2.70E+06       | (K)SYGFER)(K) S Y I V G R F P D E N/L K R(K)           | 138.32 | 461.4888 | 1842.939 | -0.0011 | -0.6 | 5.9  | 23799.1  | 9.48  | HUMAN | P23284         | Peptidyl-prolyl cis-trans isomerase B                                  |
| 9162 | dirMS_041712_NAR_50mM_plus1.10431.10431.2  | 2 | 10.58 | 0 | 5.39E+06       | (K)IVRQDA)(K) V D V L V P Q/V L N V C/Q N(K)           | 144.95 | 723.8487 | 1446.689 | -0.0008 | 0.6  | 4.14 | 40669.4  | 4.83  | HUMAN | ETV8R1         | Tubulin beta chain                                                     |
| 9163 | dirMS_041712_NAR_20mM_plus1.11505.11505.2  | 2 | 10.58 | 0 | 1.46E+05       | (R)IVAYD)(R) V A I V L V T Y T L V L R(V)              | 151.57 | 649.9149 | 1409.521 | -0.0019 | -1.4 | 4.37 | 23955    | 4.19  | HUMAN | EP9225         | Cofilin-1                                                              |
| 9164 | dirMS_041712_NAR_20mM_plus1.12315.12315.3  | 3 | 10.58 | 0 | 2.90E+05       | (K)VINGNS)(K) V N C I G S V T E/S Q/A C K(L)           | 156.77 | 545.2781 | 1633.821 | -0.0016 | -1   | 5.97 | 47328.4  | 7.76  | HUMAN | P13929         | Beta-enolase                                                           |
| 9165 | dirMS_041712_NAR_20mM_plus1.17105.17105.3  | 3 | 10.58 | 2 | 1.42E+05 M95m  | (K)LRSHMH)(K) R S H M V I E/R L C/R(R)                 | 189.42 | 534.6105 | 1585.805 | -0.0102 | 10.6 | 9.52 | 15412.9  | 8.93  | HUMAN | H7C129         | Zinc finger protein 709 (Fragment)                                     |
| 9166 | dirMS_041712_NAR_40mM_plus1.13304.13304.3  | 3 | 10.58 | 0 | 3.27E+05       | (K)IQDME)(K) Q I Q D M I A P/H H V I G T P G R(V)      | 144.08 | 540.2954 | 1618.873 | -0.0017 | -1.1 | 6.75 | 20859.5  | 4.85  | HUMAN | J3K252         | Eukaryotic initiation factor 4A1 (Fragment)                            |
| 9167 | dirMS_041712_NAR_40mM_plus1.19765.19772.3  | 3 | 10.58 | 1 | 4.40E+05       | (R)ILDQDT)(R) L I G D D T I I T V L G N L A(K)         | 185.12 | 622.5937 | 1480.722 | -0.0099 | -4.8 | 4.23 | 53536.6  | 6.01  | HUMAN | Q14004         | Cytoplasmic dynein 1 heavy chain 1                                     |
| 9168 | dirMS_041712_NAR_50mM_plus1.13728.13728.3  | 3 | 10.58 | 1 | 8.79E+06       | (R)ITMEME)(R) I T M E N E V F/L V K(D)                 | 140.98 | 494.262  | 1480.772 | -0.0001 | -0.1 | 4.78 | 13588.1  | 4.66  | HUMAN | FBV767         | Keratin, type II cytoskeletal 8 (Fragment)                             |
| 9169 | dirMS_041712_NAR_50mM_plus1.14405.14429.3  | 3 | 10.58 | 1 | 4.03E+05       | (R)IAKNSD)(R) I A K N D S V V W/G A G V/E L L S Y(K)   | 143.95 | 663.6812 | 1989.032 | -0.0031 | -1.5 | 4.68 | 46550.7  | 7.81  | HUMAN | BTZ109         | Chaperonin containing TCP1, subunit 7 (Eta), isoform CRA_a             |
| 9170 | dirMS_041712_NAR_50mM_plus1.20228.20228.3  | 3 | 10.58 | 0 | 2.66E+05       | (R)IDYHLP)(R) I D Y H L I P V E V V P/A T L R(L)       | 173.98 | 578.658  | 1737.959 | 0.0001  | 0.6  | 5.32 | 19924.8  | 9.99  | HUMAN | FBU211         | 40S ribosomal protein S10                                              |
| 9171 | dirMS_041712_NAR_50mM_plus1.2791.2791.3    | 3 | 10.58 | 1 | 1.75E+05       | (R)IGRLTG)(R) I G R L T G V I T T S P E C E E A K(A)   | 100.88 | 558.2837 | 1672.839 | -0.0023 | -1.4 | 4.49 | 255149.3 | 7.4   | HUMAN | Q25616         | Translational activator GCN4                                           |
| 9172 | dirMS_041712_NAR_50mM_plus1.7271.7271.3    | 3 | 10.58 | 1 | 9.48E+03 M625m | (K)IQAADL)(K) I A Q A L V R D N S T M/G V M A/A(K)     | 104.12 | 581.944  | 1727.82  | -0.1971 | 1.3  | 8.63 | 85057.6  | 4.94  | HUMAN | PT0790         | Heat shock protein HSP 90-alpha                                        |
| 9173 | dirMS_041712_NAR_60mM_plus1.12169.12169.3  | 3 | 10.58 | 0 | 1.36E+06       | (K)IYVNNY)(K) I Y V N N Y H N S L M P T R(R)           | 120.25 | 469.8993 | 1407.684 | -0.0004 | -0.3 | 8.57 | 16471.9  | 10.59 | HUMAN | K7E1C7         | 60S ribosomal protein L27 (Fragment)                                   |
| 9174 | dirMS_041712_NAR_60mM_plus1.16440.16440.3  | 3 | 10.58 | 1 | 6.53E+05       | (K)IAVEAF)(K) I A V E A F D G K D F G Q S G(K)         | 142.28 | 562.2762 | 1684.797 | -0.0195 | 10.4 | 4.56 | 65213.5  | 9.57  | HUMAN | BDQYU          | Ewing sarcoma breakpoint region 1                                      |
| 9175 | dirMS_041712_NAR_30mM_minus1.13912.13912.2 | 2 | 10.57 | 0 | 1.66E+05       | (K)INVGDL)(K) I N V G D L Q M G T N R(K)               | 129.38 | 601.8183 | 1202.631 | -0.0017 | -1.4 | 9.75 | 22562.2  | 8.88  | HUMAN | PF7802         | Transgelin-2                                                           |
| 9176 | dirMS_041712_NAR_50mM_minus1.10964.10964.3 | 3 | 10.58 | 1 | 3.04E+06 M72m  | (R)ITEMEN)(R) I T E M E N E V L V K(L)                 | 182.97 | 499.5937 | 1480.772 | -0.0099 | -4.8 | 4.23 | 13588.1  | 4.66  | HUMAN | FBV767         | Keratin, type II cytoskeletal 8 (Fragment)                             |
| 9177 | dirMS_041712_NAR_50mM_minus1.11847.11847.3 | 3 | 10.57 | 1 | 1.19E+05       | (K)IDVDEA)(K) I D V D E A V M N K V E L S/R(L)         | 135.67 | 599.9481 | 1797.832 | -0.0026 | -1.5 | 4.18 | 13588.1  | 4.66  | HUMAN | FBV767         | Keratin, type II cytoskeletal 8 (Fragment)                             |
| 9178 | dirMS_041712_NAR_50mM_minus1.14585.14585.3 | 3 | 10.57 | 1 | 1.93E+05       | (K)IAGGA)(R) I E A V A I G A F R P D F S G(K)          | 151.2  | 508.2599 | 1522.765 | -0.0003 | 0.2  | 6.12 | 266161   | 5.68  | HUMAN | EP9PUD         | Epiplakin                                                              |
| 9179 | dirMS_041712_NAR_50mM_minus1.18803.18803.3 | 3 | 10.57 | 1 | 2.15E+06       | (R)IILAUE)(R) I I A L I U E V M S Q H T R(K)           | 183.68 | 461.6289 | 1382.873 | -0.0008 | -0.6 | 8.75 | 28026.9  | 5.48  | HUMAN | Q75969         | Flamin-B                                                               |
| 9180 | dirMS_041712_NAR_50mM_minus1.14355.14355.3 | 3 | 10.57 | 1 | 1.37E+05 M484m | (R)IILGSG)(R) I I L G S G V L V L V L Q/R(V)           | 152.15 | 641.3971 | 1911.522 | -0.0009 | -0.7 | 5.32 | 19773.1  | 9.47  | HUMAN | PT2572         | Keratin, type II cytoskeletal 18                                       |
| 9181 | dirMS_041712_NAR_50mM_minus1.2783.2783.3   | 3 | 10.57 | 0 | 2.51E+06 M484m | (R)ILSGG)(R) I E I S G N V M S I Q T R(K)              | 98.97  | 497.9023 | 1475.698 | -0.1942 | 0.5  | 6.75 | 56607.4  | 5.37  | HUMAN | FBV804         | Keratin, type II cytoskeletal 8                                        |
| 9182 | dirMS_041712_NAR_20mM_plus1.17684.17684.2  | 2 | 10.57 | 0 | 1.88E+05       | (R)IYSPDL)(R) I Y S P D Q L A D L Y K(S)               | 194.17 | 713.3667 | 1425.726 | -0.0001 | 0.1  | 4.21 | 47510.4  | 7.04  | HUMAN | PO6733         | Alpha-enolase                                                          |
| 9183 | dirMS_041712_NAR_20mM_plus1.7273.7273.2    | 2 | 10.57 | 0 | 2.85E+04       | (R)IVLEGG)(R) I V L E G G V E A R A(T)                 | 118.03 | 544.7829 | 1088.558 | -0.0003 | 0.3  | 4.25 | 25834.8  | 5.94  | HUMAN | Q96C77         | Coiled-coil domain-containing protein 124                              |
| 9184 | dirMS_041712_NAR_30mM_plus1.16838.16838.2  | 2 | 10.57 | 0 | 2.17E+05       | (K)IYSPDL)(R) I Y S P D Q L A D L Y K(S)               | 194.17 | 713.3667 | 1425.726 | -0.0001 | 0.1  | 4.21 | 47510.4  | 7.04  | HUMAN | PO6733         | Alpha-enolase                                                          |
| 9185 | dirMS_041712_NAR_30mM_plus1.18848.18848.2  | 2 | 10.57 | 0 | 2.59E+05       | (K)IATGFC)(K) I A T G F D D F P S G(K)                 | 151.77 | 627.8052 | 1254.6   | -0.0003 | 2.4  | 4.21 | 34221.3  | 6.44  | HUMAN | P15524         | Desmoplakin                                                            |
| 9186 | dirMS_041712_NAR_30mM_plus1.21591.21591.2  | 2 | 10.57 | 0 | 1.46E+05       | (R)ITVLAF)(R) I T V L A F G P T N A M F(K)             | 168.2  | 679.9016 | 1358.804 | -0.0083 | -6.1 | 8.75 | 32621    | 8.75  | HUMAN | BD4LC0         | Poly(C)-binding protein 2                                              |
| 9187 | dirMS_041712_NAR_40mM_plus1.18636.18636.3  | 3 | 10.57 | 0 | 4.72E+06       | (R)IVSFVY)(R) I V S F V H L N P V I A K(M)             | 175.93 | 560.6533 | 1679.948 | -0.0026 | -1.5 | 6.75 | 35663.7  | 5.91  | HUMAN | BD4WV0         | Selenide, water dikinase 1                                             |
| 9188 | dirMS_041712_NAR_50mM_plus1.10969.10969.3  | 3 | 10.57 | 1 | 1.34E+05       | (R)ILGVEY)(R) I L G V E Y D G S C L V I A G T C K Q(V) | 101.17 | 565.2794 | 1693.825 | -0.0011 | -0.7 | 6.07 | 30619.5  | 9.34  | HUMAN | HDH010         | Electron transfer flavoprotein subunit alpha, mitochondrial (Fragment) |
| 9189 | dirMS_041712_NAR_50mM_plus1.17460.17460.3  | 3 | 10.57 | 0 | 6.06E+05       | (R)IMVDE)(R) I M V D E A I T T I D S Q R(K)            | 160.3  | 638.6636 | 1815.975 | -0.0013 | 0.7  | 5.32 | 88515.7  | 7.35  | HUMAN | P17858         | 6-phosphofructokinase, liver type                                      |
| 9190 | dirMS_041712_NAR_60mM_plus1.12032.12032.2  | 2 | 10.57 | 1 | 1.52E+06       | (R)IDGKLV)(R) I D G K L V I E S D S V L P K(L)         | 120.25 | 377.8869 | 1473.78  | -0.013  | -8.8 | 4.56 | 56607.4  | 5.37  | HUMAN | FBV804         | Keratin, type II cytoskeletal 8                                        |
| 9191 | dirMS_041712_NAR_60mM_plus1.14247.14249.3  | 3 | 10.57 | 1 | 1.22E+06       | (K)IAVLCS)(K) I A V L C S E D V K N(K)                 | 131.62 | 437.2332 | 1309.682 | 0.0023  | 2.3  | 6.11 | 22956    | 8.88  | HUMAN | EPK925         | Cofilin-1                                                              |
| 9192 | dirMS_041712_NAR_60mM_plus1.14620.14620.3  | 3 | 10.57 | 1 | 5.07E+05       | (K)IKKQDQ)(K) K Q D Q T E V D V N V G L R V(L)         | 133.13 | 596.2816 | 1786.824 | 0.0006  | 3.4  | 4.32 | 26991.7  | 5.01  | HUMAN | BTZ026         | Myosin light polypeptide 6                                             |
| 9193 | dirMS_041712_NAR_50mM_plus1.15361.15361.3  | 3 | 10.57 | 1 | 2.17E+05       | (R)IATGFC)(K) I A T G F D D F P S G(K)                 | 151.77 | 627.8052 | 1254.6   | -0.0003 | 2.4  | 4.21 | 34221.3  | 6.44  | HUMAN | P15524         | Desmoplakin                                                            |
| 9194 | dirMS_041712_NAR_60mM_plus1.19956.19956.3  | 3 | 10.57 | 1 | 1.46E+05       | (R)IATGFC)(K) I A T G F D D F P S G(K)                 | 151.77 | 627.8052 | 1254.6   | -0.0003 | 2.4  | 4.21 | 34221.3  | 6.44  | HUMAN | P15524         | Desmoplakin                                                            |
| 9195 | dirMS_041712_NAR_120mM_minus1.8392.8392.3  | 3 | 10.56 | 1 | 6.76E+05       | (K)IKQDQ)(R) K Q D Q T E V D V N V G L R V(L)          | 100.15 | 410.5736 | 1229.71  | -0.0037 | -3   | 6.14 | 71218.8  | 6.3   | HUMAN | A7Y18          | Radixin                                                                |
| 9196 | dirMS_041712_NAR_50mM_minus1.10390.10390.3 | 3 | 10.56 | 0 | 1.66E+05       | (K)IQDAEP)(K) I Q D A E P H A V M V G T P G R(V)       | 127.08 | 515.6179 | 1544.854 | -0.0152 | -9.8 | 6.75 | 41517.9  | 5.45  | HUMAN | E7E0G2         | Eukaryotic initiation factor 4A-II                                     |
| 9197 | dirMS_041712_NAR_50mM_minus1.1464.1464.3   | 3 | 10.56 | 0 | 6.18E+04       | (K)IVALLG)(R) I V A L L G L N L D L P H A A K(R)       | 150.53 | 558.9883 | 1614.954 | -0.0099 | -7.2 | 6.71 | 48283.8  | 6.07  | HUMAN | Q12395         | Arlryin-3                                                              |
| 9198 | dirMS_041712_NAR_50mM_minus1.6783.6783.3   | 3 | 10.56 | 0 | 5.93E+05       | (R)IETNPR)(R) E T N P P Y L G D S K P K(K)             | 105.52 | 527.2846 | 1575.833 | -0.0066 | -4.2 | 4.79 | 55361.8  | 6.42  | HUMAN | G5E422         | Protein disulfide isomerase family A, member 3, isoform CRA_b          |
| 9199 | dirMS_041712_NAR_120mM_plus1.13276.13276.4 | 4 | 10.56 | 1 | 1.43E+06       | (K)SIVHSS)(K) S V H S S P R/L N D S V P D R(V)         | 123.27 | 466.7533 | 1863.992 | -0.0099 | -0.5 | 6.47 | 54427.4  | 5.96  | HUMAN | K4D1D9         | Acetyl-CoA carboxylase 1                                               |
| 9200 | dirMS_041712_NAR_20mM_plus1.13983.13983.2  | 2 | 10.56 | 0 | 2.82E+05       | (R)IENHIL)(R) I E N H I L S N A L K(R)                 | 167.63 | 557.8267 | 1114.647 | -0.0005 | -0.5 | 6    | 77799.7  | 9.09  | HUMAN | PS2272         | Heterogeneous nuclear ribonucleoprotein M                              |
| 9201 | dirMS_041712_NAR_20mM_plus1.18262.18262.2  | 2 | 10.56 | 0 | 1.14E+04       | (K)IADITL)(K) I A D I T L I F T D A V(K)               | 197.1  | 554.80   |          |         |      |      |          |       |       |                |                                                                        |

|      |                                          |   |       |   |                |                                                           |        |          |          |          |       |      |          |       |       |        |                                                                                                     |
|------|------------------------------------------|---|-------|---|----------------|-----------------------------------------------------------|--------|----------|----------|----------|-------|------|----------|-------|-------|--------|-----------------------------------------------------------------------------------------------------|
| 9261 | drMS_041712_NAR_50mM_minus15300.15300.3  | 3 | 10.53 | 1 | 4.51E+05       | (KIGADLVY(K)G A) LTTV L V I T E V E N G S L G S K K(G)    | 15555  | 636.662  | 1907.971 | 0.0005   | 0.3   | 4.68 | 30947.9  | 6.47  | HUMAN | H80324 | Pyruvate kinase                                                                                     |
| 9262 | drMS_041712_NAR_50mM_minus9600.9600.3    | 3 | 10.53 | 0 | 1.82E+05       | (RIAGSFA(R)H I)G S A S E V G A S Q S L G E V V M(K)S)     | 12255  | 554.059  | 1961.956 | -0.0027  | -1.6  | 5.4  | 20148.5  | 4.65  | HUMAN | B4E2V4 | Proteasome (Prosome, macropain) subunit, alpha type, 5, isoform CRA_c                               |
| 9263 | drMS_041712_NAR_50mM_minus1216.1216.1    | 3 | 10.53 | 1 | 4.16E+04       | (KISYGGV(K)N V)S L I G L L T F G D L L P T G M P P L R(L) | 18157  | 511.228  | 1515.82  | -0.0005  | -6.4  | 4.56 | 13734.8  | 7.94  | HUMAN | ENR57  | 14.1 kDa actin-binding enzyme subunit 1, isoform CRA_a                                              |
| 9264 | drMS_041712_NAR_20mM_plus1842.1842.3     | 2 | 10.53 | 0 | 1.34E+05       | (KRNPHM(L)K)N P)M L T S A E V G Q S T R(S)                | 19788  | 511.228  | 1515.82  | -0.0005  | -6.4  | 4.56 | 12611.4  | 8.8   | HUMAN | ENR57  | Transcription elongation factor A protein 1                                                         |
| 9265 | drMS_041712_NAR_20mM_plus9940.9940.2     | 2 | 10.53 | 0 | 1.34E+05       | (KRNPHM(L)K)E I A T V S F D P P S A K(A)                  | 140.2  | 710.8324 | 1420.659 | -0.0005  | -1.1  | 4.03 | 53724.2  | 9.54  | HUMAN | H8BP67 | RNA-binding protein FUS                                                                             |
| 9266 | drMS_041712_NAR_30mM_plus14897.15001.2   | 2 | 10.53 | 0 | 1.06E+06       | (KISDILVY(K)S L)D L V T M M(K)                            | 131.83 | 453.7487 | 906.496  | -0.0014  | -7    | 5.55 | 51212    | 5.84  | HUMAN | ANF09  | Septin-8                                                                                            |
| 9267 | drMS_041712_NAR_30mM_plus17094.17094.2   | 2 | 10.53 | 0 | 3.76E+04 M185m | (KLAIVN(H)K)E L F A L N P P P L R(L)                      | 142.12 | 580.3376 | 1143.524 | -0.0006  | -0.4  | 5.4  | 42230.8  | 4.77  | HUMAN | AS0428 | Positive beta-tubulin beta chain-like protein ENSP0000290377                                        |
| 9268 | drMS_041712_NAR_30mM_plus22034.22034.2   | 2 | 10.53 | 0 | 1.97E+05       | (KISGSLG(K)S L)G L E L T G L T N A A K(V)                 | 170.3  | 707.8889 | 1414.79  | -0.0195  | -13.8 | 6    | 31075.7  | 5.65  | HUMAN | PR0174 | Triosephosphate isomerase                                                                           |
| 9269 | drMS_041712_NAR_30mM_plus2.6874.6874.2   | 2 | 10.53 | 0 | 7.31E+04       | (RIENPPYV(R)E N)P P Y D S R(L)                            | 90.4   | 522.2255 | 1043.443 | 0.0009   | 0.8   | 4.37 | 193379.8 | 5.84  | HUMAN | Q00610 | Clastrin heavy chain 1                                                                              |
| 9270 | drMS_041712_NAR_30mM_plus2.8871.8872.2   | 2 | 10.53 | 0 | 1.69E+05       | (RIYAFEF(R)A)Y I E F A E R(C)                             | 99.37  | 443.2095 | 885.41   | 0.0016   | 1.8   | 4.53 | 14109.9  | 6.01  | HUMAN | J3K87  | Clastrin heavy chain 2                                                                              |
| 9271 | drMS_041712_NAR_50mM_plus21474.21474.3   | 3 | 10.53 | 0 | 8.95E+04       | (KIGAYE(L)K)E A I E L V L H S L P I A V R(Q)              | 184.3  | 535.3092 | 1063.917 | -0.0006  | -2.2  | 5.4  | 52378.2  | 5.32  | HUMAN | C1924  | 26S proteasome non-ATPase regulatory subunit 6                                                      |
| 9272 | drMS_041712_NAR_50mM_plus9460.9460.2     | 2 | 10.53 | 0 | 4.97E+05       | (KSYVCA(L)K)E L A L V L P L R(L)                          | 107.7  | 743.3451 | 1463.027 | -0.0004  | -2.5  | 6.47 | 15730.4  | 11.8  | HUMAN | Y1781  | 60S ribosomal protein L32 (Fragment)                                                                |
| 9273 | drMS_041712_NAR_120mM_minus6182.6206.3   | 3 | 10.52 | 1 | 1.20E+05       | (KQADGE(L)K)A Q I Q L E L E G T R(A)                      | 87.68  | 463.2365 | 1387.692 | 0.0025   | 1.8   | 4.79 | 67933    | 6.08  | HUMAN | P26308 | Moesin                                                                                              |
| 9274 | drMS_041712_NAR_40mM_minus13913.13913.3  | 3 | 10.52 | 1 | 2.77E+04       | (RIQISTP(R)R)Q I S H S P D K D I V A Q L K(Q)             | 166.05 | 632.6978 | 1896.08  | -0.0012  | -0.6  | 5.96 | 42442.7  | 4.65  | HUMAN | FSW0X8 | Interferon regulatory factor 6                                                                      |
| 9275 | drMS_041712_NAR_40mM_minus29514.9514.3   | 3 | 10.52 | 1 | 5.83E+04       | (KIVYGGG(K)V L)C G D V I V P D F L K L(D)                 | 138.65 | 601.6499 | 1802.396 | -0.0006  | -0.3  | 4.56 | 47309.6  | 5.42  | HUMAN | B4DXY7 | 4-trimethylaminopyridine aldehyde dehydrogenase                                                     |
| 9276 | drMS_041712_NAR_50mM_minus15471.15473.3  | 3 | 10.52 | 1 | 4.53E+05       | (KIVYGGG(K)V)Q L D K G V V V L R(L)                       | 146.32 | 575.4267 | 1424.778 | 0.0047   | 3.3   | 5.96 | 51234.1  | 4.82  | HUMAN | FSH012 | Protein disulfide-isomerase                                                                         |
| 9277 | drMS_041712_NAR_20mM_plus.8791.8791.2    | 2 | 10.52 | 0 | 3.69E+03       | (RIAVJAG(R)A V)L I A G D P Q T G T(K)                     | 131.15 | 556.3256 | 1111.647 | -0.0001  | -2.8  | 8.8  | 46476.4  | 5.33  | HUMAN | SKC059 | RuvB-like 2                                                                                         |
| 9278 | drMS_041712_NAR_30mM_plus21203.11203.3   | 3 | 10.52 | 0 | 2.44E+05 M304m | (KRNMGV(R)M G) Q M V A M G G I N M G(N)R)                 | 112.5  | 518.8921 | 1538.67  | -0.0007  | -1.7  | 9.5  | 43979.5  | 8.92  | HUMAN | FSV023 | Non-POU domain-containing octamer-binding protein                                                   |
| 9279 | drMS_041712_NAR_30mM_plus21905.21905.2   | 2 | 10.52 | 0 | 2.21E+05       | (RINSLA(L)R)N S V L A V Q I U D Q S A R(A)                | 170.18 | 707.8889 | 1414.765 | 0.0057   | 4     | 5.84 | 15111    | 6.44  | HUMAN | B4D6E4 | Programmed cell death protein 5                                                                     |
| 9280 | drMS_041712_NAR_30mM_plus2582.7582.2     | 2 | 10.52 | 0 | 1.94E+06       | (RIGTLDV(R)P)T L D V P V E(K)                             | 98.1   | 429.7312 | 858.457  | -0.0016  | -4.9  | 4.37 | 45508.6  | 5.5   | HUMAN | AKR702 | Heat shock cognate 71 kDa protein                                                                   |
| 9281 | drMS_041712_NAR_30mM_plus29284.9284.2    | 2 | 10.52 | 0 | 2.55E+05       | (KRVKAA(L)K)S V I E A V A L E L A S(K)                    | 103.17 | 538.2855 | 1075.563 | 0.0007   | 0.7   | 4.53 | 12131.5  | 11.14 | HUMAN | FSG0R3 | Parathyroidin                                                                                       |
| 9282 | drMS_041712_NAR_30mM_plus2.9405.9510.2   | 2 | 10.52 | 0 | 8.41E+06       | (RIASLYD(R)A)S I L D R(V)                                 | 104.42 | 419.2286 | 837.447  | 0.0034   | 4.1   | 5.83 | 43773.3  | 5.26  | HUMAN | FBV29  | Keratin, type I cytoskeletal 18                                                                     |
| 9283 | drMS_041712_NAR_40mM_plus14704.17404.3   | 3 | 10.52 | 1 | 3.02E+05       | (KTIQSDV(R)K)G V S D V F A K N D L A V V D R(A)           | 168.29 | 640.3451 | 1919.023 | -0.0025  | -1.3  | 4.43 | 76670.1  | 4.6   | HUMAN | P19338 | Nucleolin                                                                                           |
| 9284 | drMS_041712_NAR_50mM_plus15399.15399.3   | 3 | 10.52 | 1 | 3.32E+05       | (KTIQSDV(R)K)G V S D V F A A D G G V V V V R(K)           | 168.63 | 580.0556 | 1738.011 | -0.0027  | -5    | 5.73 | 7945.1   | 11.03 | HUMAN | CHB50  | 60S ribosomal protein L28                                                                           |
| 9285 | drMS_041712_NAR_50mM_plus16669.16669.3   | 3 | 10.52 | 1 | 3.33E+05       | (KILTTSEL(K)L L)T F G D L L P T G M P P L R(L)            | 155.22 | 532.9815 | 1056.935 | -0.0004  | -6.2  | 6.07 | 72070    | 7.16  | HUMAN | Q75M11 | ATP-binding cassette sub-family F member 2                                                          |
| 9286 | drMS_041712_NAR_120mM_minus13197.13197.4 | 4 | 10.51 | 1 | 5.13E+05       | (KQSVSHM(K)S V)S V I P L A L N S K P I D(R)               | 126.43 | 466.7255 | 1863.992 | -0.0041  | -2.2  | 6.47 | 54427.4  | 5.96  | HUMAN | K4D09  | Acetyl-CoA carboxylase 1                                                                            |
| 9287 | drMS_041712_NAR_40mM_minus12196.12196.3  | 3 | 10.51 | 1 | 4.38E+05       | (RIIAJF(S)R)I I A I F A P V S P N V E D N E K D L K(L)    | 155.88 | 658.3553 | 1973.059 | -0.0076  | -3.9  | 4.32 | 21953.7  | 6.16  | HUMAN | APVX3  | 26S proteasome non-ATPase regulatory subunit 4 (Fragment)                                           |
| 9288 | drMS_041712_NAR_50mM_minus11211.11211.3  | 3 | 10.51 | 1 | 1.29E+05       | (RIEILDV(R)R)E I I G V V T P P H N P(K)                   | 131.21 | 445.912  | 1335.727 | -0.0052  | -3.9  | 5.32 | 14942.8  | 8.71  | HUMAN | CSU51  | N-alpha-acetyltransferase 50                                                                        |
| 9289 | drMS_041712_NAR_50mM_minus14813.14813.3  | 3 | 10.51 | 1 | 2.80E+05       | (RIEILDV(R)R)E I I G V V T P P H N P(K)                   | 151.67 | 471.211  | 1278.927 | -0.0029  | -1.6  | 4.27 | 42929    | 6.47  | HUMAN | CHX7   | Xenopus repair complex-defective repair in Chinese hamster cells 6 (Ku autoantigen, 70kDa)          |
| 9290 | drMS_041712_NAR_50mM_minus2.6969.6969.3  | 3 | 10.51 | 1 | 1.74E+05       | (RSIDEEA(R)S)E A L E A A D A U P T K T(K)                 | 106.92 | 520.6021 | 1586.791 | -0.0018  | -1.1  | 4.41 | 18924.5  | 6.86  | HUMAN | FW028  | PEST protein-catalytic signal-containing protein in Chinese hamster cells 6 (Ku autoantigen, 70kDa) |
| 9291 | drMS_041712_NAR_50mM_minus2.7827.7827.3  | 3 | 10.51 | 1 | 1.10E+05       | (KVLVJG(L)K)L Q L S K D Q I T A G N A R(K)                | 111.02 | 562.3158 | 1684.934 | -0.0012  | -0.7  | 8.72 | 46335.4  | 6.29  | HUMAN | EPB851 | Phosphoribosylaminimidazole carboxylase (Fragment)                                                  |
| 9292 | drMS_041712_NAR_60mM_minus12794.12794.3  | 3 | 10.51 | 1 | 1.97E+05       | (KLSAEKV(K)A)E V A E V I E T L R(E)                       | 137.67 | 477.6112 | 1430.821 | -0.0023  | -1.6  | 6.14 | 26661.1  | 7.81  | HUMAN | HOY169 | Proteasome non-subunit alpha type (Fragment)                                                        |
| 9293 | drMS_041712_NAR_120mM_plus18077.18077.4  | 4 | 10.51 | 1 | 4.35E+05       | (RIKLEEL(R)K)E L I I S A N A R V R(L)                     | 111.02 | 459.8975 | 1257.568 | -0.0021  | -1.1  | 8.36 | 14119.8  | 6.41  | HUMAN | AKR013 | Ubr1-198A ligase                                                                                    |
| 9294 | drMS_041712_NAR_20mM_plus10435.10435.2   | 2 | 10.51 | 0 | 1.88E+05 M529m | (RIHMPG(R)M)G P A V N I G P A L I G A G T R(M)            | 164.85 | 683.3767 | 1427.713 | 31.993   | 21.1  | 5.75 | 77995.7  | 9.09  | HUMAN | PS2272 | Heterogeneous nuclear ribonucleoprotein M                                                           |
| 9295 | drMS_041712_NAR_20mM_plus13706.13706.2   | 2 | 10.51 | 0 | 2.16E+05 M98m  | (RIITLTV(D)R)T L T I V A D T I G V G T R(M)               | 146.65 | 665.361  | 1349.735 | 15.9924  | 1.8   | 5.5  | 20151.2  | 16.48 | HUMAN | GSV218 | Heat shock protein HSP 90-alpha (Fragment)                                                          |
| 9296 | drMS_041712_NAR_20mM_plus18215.18215.2   | 2 | 10.51 | 0 | 1.00E+05       | (RIALVDE(R)A)L V I L D I L E P G T D S V S R(L)           | 196.67 | 808.419  | 1615.836 | -0.0053  | -3.3  | 4.03 | 27549.9  | 4.39  | HUMAN | EPB814 | Tubulin beta chain                                                                                  |
| 9297 | drMS_041712_NAR_20mM_plus12929.13955.2   | 2 | 10.51 | 0 | 5.96E+05       | (KILADP(S)K)A L I D I V I A S K(Q)                        | 126    | 432.7483 | 864.482  | 0.0008   | 7.8   | 5.88 | 107710.1 | 5.38  | HUMAN | BTY716 | Actinin alpha 1 isoform 3                                                                           |
| 9298 | drMS_041712_NAR_30mM_plus18571.18574.2   | 2 | 10.51 | 0 | 1.93E+05       | (RIEELP(S)K)E L I E F V L R(R)                            | 150.95 | 485.2559 | 969.504  | 0.0005   | 0.5   | 4.53 | 24490    | 6.92  | HUMAN | PR2241 | 40S ribosomal protein S8                                                                            |
| 9299 | drMS_041712_NAR_40mM_plus2.10686.10686.3 | 3 | 10.51 | 0 | 6.79E+04 M35m  | (KQAASD(L)K)A A S D I A M T E L P P T H P I R(L)          | 128.38 | 612.652  | 1819.937 | -0.0044  | -5.1  | 5.32 | 12926.1  | 4.4   | HUMAN | K7EM20 | 14-3-3 protein epsilon (Fragment)                                                                   |
| 9300 | drMS_041712_NAR_40mM_plus2.8349.8349.2   | 2 | 10.51 | 0 | 2.86E+05       | (RIFGSM(R)F)G S G M N M R E(G)                            | 109.5  | 478.706  | 956.408  | -0.0013  | -3.1  | 9.75 | 77799.7  | 9.09  | HUMAN | PS2272 | Heterogeneous nuclear ribonucleoprotein M                                                           |
| 9301 | drMS_041712_NAR_50mM_plus21751.17151.3   | 3 | 10.51 | 1 | 1.02E+06       | (KRNMGV(K)N)N G V I G L E P M K Q(S)                      | 158.53 | 509.9448 | 1572.82  | -0.0001  | -0.1  | 6.07 | 29854.8  | 9.49  | HUMAN | CS190  | Regulator of chromosome condensation (Fragment)                                                     |
| 9302 | drMS_041712_NAR_50mM_plus2.5192.5192.3   | 3 | 10.51 | 0 | 1.37E+05       | (RIEILV(L)K)E L I I S A N A R V R(L)                      | 111.02 | 459.8975 | 1257.568 | -0.0021  | -1.1  | 8.36 | 14119.8  | 6.41  | HUMAN | AKR013 | Triosephosphate isomerase                                                                           |
| 9303 | drMS_041712_NAR_60mM_plus12185.12185.3   | 3 | 10.51 | 1 | 1.01E+06 M232m | (KIDMSV(R)M)M S M K E V D G M L N V Q N(K)                | 120.57 | 647.3021 | 1923.897 | 15.9945  | 0.2   | 4.68 | 40069.4  | 4.83  | HUMAN | FW17E1 | Tubulin beta chain                                                                                  |
| 9304 | drMS_041712_NAR_60mM_plus14896.14896.3   | 3 | 10.51 | 1 | 1.99E+05       | (KILVLEK(L)K)E L V E L E V G I T R(K)                     | 134.62 | 410.254  | 1228.571 | -0.0037  | -3    | 6.14 | 109459.8 | 4.94  | HUMAN | FSV078 | General vesicular transport factor p115                                                             |
| 9305 | drMS_041712_NAR_60mM_plus16296.16296.3   | 3 | 10.51 | 1 | 3.69E+05 S177s | (KIDIDSP(K)D I)S I S I P F F R K(K)                       | 112.85 | 532.2733 | 1391.742 | 203.6037 | -9.8  | 4.56 | 62903.7  | 5.8   | HUMAN | Q09666 | Neuroblast differentiation-associated protein ANNAK                                                 |
| 9306 | drMS_041712_NAR_120mM_minus10330.10330.3 | 3 | 10.5  | 1 | 3.07E+05       | (RIKLEEL(R)K)E L I I S A N A R V R(L)                     | 111.02 | 459.8975 | 1257.568 | -0.0021  | -1.4  | 4.79 | 23239.8  | 5.52  | HUMAN | F22ZU8 | Myosin-14                                                                                           |
| 9307 | drMS_041712_NAR_120mM_minus10623.10640.3 | 3 | 10.5  | 1 | 1.97E+06       | (KIVYETE(L)R)K Y T T E L A A N R(Q)                       | 111.73 | 413.885  | 1239.64  | 0.0003   | 0.2   | 6.11 | 43773.3  | 5.26  | HUMAN | FBV29  | Keratin, type I cytoskeletal 18                                                                     |
| 9308 | drMS_041712_NAR_30mM_minus1.6793.16793.2 | 2 | 10.5  | 0 | 1.47E+05       | (RIJNSA(F)R)N P S A F L A V R A R(L)                      | 144.82 | 620.3013 | 1239.594 | 0.0014   | 1.1   | 9.75 | 18626.5  | 5.64  | HUMAN | B8ZK2  | Gamma-glutamylcystotransferase                                                                      |
| 9309 | drMS_041712_NAR_30mM_minus1.7470.17470.2 | 2 | 10.5  | 0 | 2.34E+05       | (RIINGGL(R)M)G G V G Q I U L A D L R(G)                   | 141.98 | 585.3352 | 1169.664 | -0.0004  | -0.5  | 5.84 | 34524.7  | 5.4   | HUMAN | AMV37  | Protein SEC13 homolog                                                                               |
| 9310 | drMS_041712_NAR_40mM_minus11319.11319.3  | 3 | 10.5  | 0 | 4.83E+05       | (RIEIDVDE(R)T)Q V E L V G V T P P H N P(K)                | 150.57 | 660.3663 | 1979.092 | -0.0077  | -3.9  | 6.41 | 26702.7  | 5.95  | HUMAN | CI3085 | Acetyl-CoA carboxylase 1                                                                            |
| 9311 | drMS_041712_NAR                          |   |       |   |                |                                                           |        |          |          |          |       |      |          |       |       |        |                                                                                                     |



|      |                                           |   |       |   |          |       |                                                        |                     |        |          |          |         |       |      |          |      |       |        |                                                                 |
|------|-------------------------------------------|---|-------|---|----------|-------|--------------------------------------------------------|---------------------|--------|----------|----------|---------|-------|------|----------|------|-------|--------|-----------------------------------------------------------------|
| 9479 | dirMS_041712_NAR_20mM_plus.17792.17792.2  | 2 | 10.43 | 0 | 9.19E+04 | M148m | (KITFAPEE) (K)T F/A/P/E/E V S A m V L T (K)M           | m.Desmod methionine | 193.65 | 776.8996 | 1536.798 | 15.9941 | -0.5  | 4.53 | 72445.7  | 5.07 | HUMAN | P11021 | 78 kDa glucose-regulated protein                                |
| 9480 | dirMS_041712_NAR_20mM_plus.18159.18159.2  | 2 | 10.43 | 0 | 1.02E+05 |       | (RIALVDE) (R)A I/J/D/E/P L L T L E A/P L P V S (R)     | m.Desmod methionine | 196.63 | 808.419  | 1613.836 | -0.0023 | -3.3  | 4.03 | 27459.9  | 4.39 | HUMAN | EP914  | Tubulin beta chain                                              |
| 9481 | dirMS_041712_NAR_20mM_plus.7461.7500.2    | 2 | 10.43 | 0 | 7.62E+05 | M106m | (KIMNANR) (K)I A/V/A/S (R)                             | m.Desmod methionine | 91.58  | 451.2565 | 899.555  | 16      | -0.5  | 4.83 | 21077    | 9.43 | HUMAN | U0148  | WDY recombinant-activating protein 1                            |
| 9482 | dirMS_041712_NAR_30mM_plus.8320.8370.2    | 2 | 10.43 | 0 | 2.24E+05 |       | (RIVNEGR) (R)I/A/J/L/I/P G P A (R)E                    | m.Desmod methionine | 97.73  | 455.2602 | 909.515  | -0.0021 | -2.3  | 5.97 | 36856.1  | 4.55 | HUMAN | HDY4A  | Sorbitol dehydrogenase                                          |
| 9483 | dirMS_041712_NAR_40mM_plus.1208.1208.3    | 3 | 10.43 | 0 | 1.02E+05 |       | (RIVVNSR) (R)V A/D/S/V/V/V/A/E/S Q/K P E L (K)         | m.Desmod methionine | 142.05 | 614.3443 | 1841.038 | -0.0195 | -10.6 | 6.11 | 61441.6  | 5.93 | HUMAN | GBL19  | Fraxile X mental retardation protein 1                          |
| 9484 | dirMS_041712_NAR_40mM_plus.15258.15258.3  | 3 | 10.43 | 0 | 2.60E+05 |       | (RIVAPDEI) (R)V A/D/P/E H P L L T L E A/P L P V K (K)  | m.Desmod methionine | 135.53 | 652.0252 | 1954.064 | -0.0034 | -1.7  | 4.65 | 42344.8  | 5.39 | HUMAN | DS281  | Beta-actin-like protein 2                                       |
| 9485 | dirMS_041712_NAR_40mM_plus.2079.2079.2    | 2 | 10.43 | 0 | 5.40E+04 |       | (KIRAPAK) (R)I A/P/A/S (R)                             | m.Desmod methionine | 116.88 | 450.2565 | 899.555  | -0.0045 | -11.6 | 4.83 | 21077    | 9.43 | HUMAN | U0148  | WDY recombinant-activating protein 1                            |
| 9486 | dirMS_041712_NAR_40mM_plus.9542.9542.2    | 2 | 10.43 | 0 | 7.31E+04 |       | (RIGGGGM) (R)E G G G V/N/P/E Q/P G S/N/ (R)R           | m.Desmod methionine | 115.27 | 689.3182 | 1377.622 | -0.0003 | -0.2  | 6.75 | 37486.1  | 9.03 | HUMAN | PZ226  | Heterogeneous nuclear ribonucleoproteins A2/B1                  |
| 9487 | dirMS_041712_NAR_50mM_plus.12033.12033.3  | 3 | 10.43 | 1 | 1.50E+05 |       | (R)JNKKQ) (R)N K Q A/G(V/F/T/V) T (K)                  | m.Desmod methionine | 131.38 | 515.9483 | 1545.827 | 0.0032  | 2.1   | 9.07 | 44227.3  | 7.81 | HUMAN | E7EQB6 | T-complex protein 1 subunit alpha                               |
| 9488 | dirMS_041712_NAR_50mM_plus.19960.19960.3  | 3 | 10.43 | 0 | 5.26E+04 |       | (K)IGLCLLE) (K)G L/L/E/L/D I S F P K/P (R)             | m.Desmod methionine | 172.9  | 634.3344 | 1900.995 | -0.0063 | -3.3  | 6.07 | 45336.8  | 9.03 | HUMAN | B72JK  | HBS1-like protein                                               |
| 9489 | dirMS_041712_NAR_60mM_plus.8202.8202.2    | 2 | 10.43 | 1 | 6.15E+05 |       | (K)RIGDTE) (R)K G S T D E I/E/V/T/S L A (K)            | m.Desmod methionine | 100.87 | 479.2451 | 1435.728 | -0.0037 | -2.6  | 4.68 | 12611.4  | 8.8  | HUMAN | ESR57  | Transcription elongation factor A protein 1                     |
| 9490 | dirMS_041712_NAR_20mM_plus.1447.1447.3    | 3 | 10.42 | 0 | 2.15E+05 |       | (R)IAEAKL) (R)A A/L/A/S L A T I/P G A (R)R             | m.Desmod methionine | 198.9  | 942.971  | 1686.901 | -0.004  | -4.6  | 4.53 | 59200.7  | 5.46 | HUMAN | PSR037 | Epoplakin                                                       |
| 9491 | dirMS_041712_NAR_50mM_minus.16105.16244.3 | 3 | 10.42 | 0 | 1.44E+05 |       | (K)LDPLHY) (K) D/P/H/V/L/A/D/L Q/L (R)                 | m.Desmod methionine | 160.2  | 440.2533 | 1318.748 | -0.0024 | -1.8  | 5.21 | 233493.8 | 5.45 | HUMAN | F8V7L3 | Mysin-10                                                        |
| 9492 | dirMS_041712_NAR_60mM_minus.1077.12077.3  | 3 | 10.42 | 1 | 4.75E+05 |       | (R)JNYYNY) (R)N I/V/Y/P/V A/E/T/G G Y/V V P R (A)      | m.Desmod methionine | 127.67 | 615.3145 | 1843.934 | -0.0048 | -2.6  | 8.43 | 50286.6  | 4.79 | HUMAN | P68371 | Tubulin beta-4B chain                                           |
| 9493 | dirMS_041712_NAR_120mM_plus.1119.1119.4   | 4 | 10.42 | 1 | 3.46E+04 |       | (R)ITFVTV) (R) F H T V/T/T/T D/P/H V (R) L             | m.Desmod methionine | 111.6  | 436.4888 | 1274.944 | -0.0102 | -5.8  | 6.75 | 31956.7  | 9.73 | HUMAN | BDQV45 | Eukaryotic translation initiation factor 3 subunit D (Fragment) |
| 9494 | dirMS_041712_NAR_120mM_plus.16302.16302.4 | 4 | 10.42 | 1 | 9.60E+05 |       | (R)IAIHTH) (R)A L/E/H T/D L V/P (K) R (A)              | m.Desmod methionine | 138.37 | 495.9614 | 1502.838 | -0.0011 | -0.7  | 5.38 | 193379.8 | 5.48 | HUMAN | Q00510 | Claudin heavy chain 1                                           |
| 9495 | dirMS_041712_NAR_120mM_plus.16964.16964.3 | 3 | 10.42 | 2 | 5.20E+05 |       | (R)JALAEIA) (R)A L I A E/V/A/K/V/L E/D/T/V P R R (R) Q | m.Desmod methionine | 142    | 653.0096 | 1957.017 | -0.0029 | -1.5  | 4.78 | 76202.2  | 9.53 | HUMAN | PZ3246 | Splicing factor, proline- and glutamine-rich                    |
| 9496 | dirMS_041712_NAR_120mM_plus.20205.20205.3 | 3 | 10.42 | 1 | 3.71E+06 |       | (K)JVAIDM) (K)A A/D/M S/V P D G K/E F/H G N I (K)V (K) | m.Desmod methionine | 158.78 | 654.3334 | 1960.992 | -0.0059 | -3    | 5.38 | 49181    | 4.93 | HUMAN | K7EPT6 | TATA-binding protein-associated factor 2N                       |
| 9497 | dirMS_041712_NAR_120mM_plus.5556.5556.4   | 4 | 10.42 | 1 | 4.14E+05 |       | (K)VGSTG) (K)V G/G T S D/V/V/N/E M K/V D (R)           | m.Desmod methionine | 82.25  | 408.9601 | 1632.819 | -0.0022 | -0.1  | 4.78 | 61224.7  | 5.7  | HUMAN | P10809 | 60 kDa heat shock protein, mitochondrial                        |
| 9498 | dirMS_041712_NAR_20mM_plus.17370.17370.2  | 2 | 10.42 | 0 | 9.69E+04 | M148m | (K)ITFAPEE) (K)T F/A/P/E/E V S A m V L T (K)M          | m.Desmod methionine | 193.58 | 776.8996 | 1536.798 | 15.9941 | -0.5  | 4.53 | 72445.7  | 5.07 | HUMAN | P11021 | 78 kDa glucose-regulated protein                                |
| 9499 | dirMS_041712_NAR_30mM_plus.19388.19388.2  | 2 | 10.42 | 0 | 1.85E+04 |       | (K)MMEFL) (K)M E/L/E/V/N E F (K) N                     | m.Desmod methionine | 155.67 | 650.7974 | 1300.588 | -0.0003 | -0.2  | 4.25 | 26800.2  | 9.35 | HUMAN | OU5FNO | Protein Ng2ipase homolog 3A                                     |
| 9500 | dirMS_041712_NAR_30mM_plus.19580.19580.2  | 2 | 10.42 | 0 | 2.14E+05 |       | (K)TVDNF) (K)T V/D N F/V/A/V/A T G E (K)G              | m.Desmod methionine | 155.58 | 682.8539 | 1364.706 | -0.0051 | -3.7  | 4.37 | 23799.1  | 9.48 | HUMAN | PZ3284 | Peptidyl-prolyl cis-trans isomerase B                           |
| 9501 | dirMS_041712_NAR_30mM_plus.22195.22195.2  | 2 | 10.42 | 0 | 1.82E+05 |       | (K)IGLSML) (K)G L/S/D S/L/L/C/N F/I (K)S               | m.Desmod methionine | 171.9  | 620.3199 | 1239.64  | -0.0077 | -6.2  | 8.75 | 470342.8 | 6.83 | HUMAN | E7EUD0 | HNA-dependent protein kinase catalytic subunit                  |
| 9502 | dirMS_041712_NAR_30mM_plus.807.807.2      | 2 | 10.42 | 0 | 2.73E+05 |       | (K)JEANEA) (K)I A/V/A/N A/G (K)D (R)                   | m.Desmod methionine | 96.92  | 472.755  | 944.505  | -0.002  | -2.1  | 4.53 | 36982.9  | 6.37 | HUMAN | P31942 | Heterogeneous nuclear ribonucleoprotein H3                      |
| 9503 | dirMS_041712_NAR_40mM_plus.8248.8248.2    | 2 | 10.42 | 0 | 2.86E+05 |       | (R)IGGSD) (R)I G/S/G/M M/V G (R)                       | m.Desmod methionine | 109.45 | 478.706  | 956.408  | -0.003  | -1.1  | 9.75 | 77799.7  | 6.09 | HUMAN | PS272  | Heterogeneous nuclear ribonucleoprotein M                       |
| 9504 | dirMS_041712_NAR_50mM_plus.22108.22108.3  | 3 | 10.42 | 1 | 5.71E+05 |       | (K)JAGLDL) (K)A G/L/F/D/L/K V/P F (K) E                | m.Desmod methionine | 189.93 | 455.2587 | 1363.762 | -0.0005 | -0.3  | 6    | 260187.7 | 6.1  | HUMAN | Q5TCU6 | Talin 1                                                         |
| 9505 | dirMS_041712_NAR_50mM_plus.13796.13796.3  | 3 | 10.42 | 0 | 7.04E+05 |       | (K)JNSLNF) (K)V L/S/L/M F/S/E C/H T (K)K               | m.Desmod methionine | 129.08 | 578.9108 | 1434.705 | 0.0133  | 9.3   | 6.72 | 16092.9  | 6.43 | HUMAN | DBRAC7 | Ras GTPase-activating protein-binding protein 2 (Fragment)      |
| 9506 | dirMS_041712_NAR_60mM_plus.14402.14402.3  | 3 | 10.42 | 1 | 1.02E+06 |       | (R)KIGAPL) (R)G G A P A T/L/D/V/D/V/A S (R)G           | m.Desmod methionine | 131.57 | 500.2895 | 1498.959 | -0.0048 | -3.2  | 8.46 | 73202    | 9.19 | HUMAN | CJMIJ5 | Probable ATP-dependent RNA helicase DDX17                       |
| 9507 | dirMS_041712_NAR_20mM_plus.1152.1152.2    | 2 | 10.41 | 0 | 5.93E+05 |       | (K)JNSLNF) (K)V L/S/L/M F/S/E C/H T (K)K               | m.Desmod methionine | 129.08 | 578.9108 | 1434.705 | 0.0133  | 9.3   | 6.72 | 16092.9  | 6.43 | HUMAN | DBRAC7 | Ras GTPase-activating protein-binding protein 2 (Fragment)      |
| 9508 | dirMS_041712_NAR_40mM_plus.1949.1949.3    | 3 | 10.41 | 1 | 6.96E+05 | M356m | (K)JGVEVM) (K)G V/E/V V/V T V/K D A M L L (K)G         | m.Desmod methionine | 136.93 | 549.6318 | 1630.908 | -0.0082 | -7.1  | 4.56 | 61224.7  | 5.7  | HUMAN | P10809 | 60 kDa heat shock protein, mitochondrial                        |
| 9509 | dirMS_041712_NAR_50mM_minus.10593.10593.3 | 3 | 10.41 | 1 | 7.41E+03 |       | (K)JVAVAC) (K)A V/V/V/V/V G/Y/D/V G G C A Q A (R)G     | m.Desmod methionine | 129.78 | 630.9952 | 1890.885 | -0.0144 | -7.6  | 8.56 | 45228.3  | 6.03 | HUMAN | FH3737 | Adenosylthymocysteine                                           |
| 9510 | dirMS_041712_NAR_60mM_plus.17898.17898.3  | 3 | 10.41 | 0 | 1.19E+06 |       | (K)JYVHLG) (K)V S H I/L G N/V/T/P F T (R)G             | m.Desmod methionine | 161.52 | 524.623  | 1571.854 | 0.0004  | -0.3  | 6.71 | 227783.5 | 5.5  | HUMAN | P35379 | Mysin-9                                                         |
| 9511 | dirMS_041712_NAR_20mM_plus.14665.14665.2  | 2 | 10.41 | 1 | 1.19E+06 |       | (R)JGSD) (R)G S/T/G/T/G/D V/S/V/A T R (K)G             | m.Desmod methionine | 127.75 | 589.6117 | 1614.975 | -0.0003 | -2.1  | 5.56 | 57891.1  | 6.43 | HUMAN | DA1175 | 3-phosphoglycerate dehydrogenase                                |
| 9512 | dirMS_041712_NAR_20mM_plus.12794.12794.2  | 2 | 10.41 | 0 | 1.23E+05 |       | (R)ILVWAS) (R)I V/V/P A/S Q G S L (K) G                | m.Desmod methionine | 161.42 | 74.8991  | 1428.788 | 0.003   | 2.1   | 8.75 | 33021    | 8.75 | HUMAN | BD4DC0 | Poly(C)-binding protein 2                                       |
| 9513 | dirMS_041712_NAR_20mM_plus.13410.13410.2  | 2 | 10.41 | 0 | 9.69E+04 |       | (R)JALIVR) (R)E A/L/I/V/Q/Q P E/L (K)K                 | m.Desmod methionine | 164.3  | 570.3361 | 139.667  | -0.0021 | -1.9  | 4.53 | 334221.3 | 6.44 | HUMAN | P19524 | Desmoplakin                                                     |
| 9514 | dirMS_041712_NAR_20mM_plus.13697.13713.2  | 2 | 10.41 | 0 | 9.86E+04 |       | (R)ILVWPA) (R)I V/V/P A T Q C G S L (K) G              | m.Desmod methionine | 166.88 | 721.9033 | 1442.804 | -0.0024 | -2.9  | 8.75 | 38010.7  | 6.67 | HUMAN | Q15365 | Poly(C)-binding protein 1                                       |
| 9515 | dirMS_041712_NAR_20mM_plus.19241.19241.2  | 2 | 10.41 | 0 | 1.63E+05 |       | (R)ITGVAN) (R)T G A/I V/D/V/P/V/G E L L (R) R          | m.Desmod methionine | 204.47 | 812.9497 | 1624.891 | 0.0017  | 1     | 4.14 | 15338.4  | 5.51 | HUMAN | K7EPT6 | ATP synthase subunit alpha, mitochondrial (Fragment)            |
| 9516 | dirMS_041712_NAR_20mM_plus.8177.8177.2    | 2 | 10.41 | 0 | 1.98E+05 |       | (K)ITVTEI) (K)I V/T/E/S V/L S (R)                      | m.Desmod methionine | 126.02 | 533.7889 | 1180.569 | 0.0017  | 1.6   | 4.37 | 80865.1  | 7.31 | HUMAN | PR1665 | Propionyl-CoA carboxylase alpha chain, mitochondrial            |
| 9517 | dirMS_041712_NAR_30mM_plus.18250.18250.2  | 2 | 10.41 | 0 | 2.50E+05 |       | (K)ITTFED) (K)I T/T/E D/L A/Q (R)C                     | m.Desmod methionine | 148.95 | 561.7934 | 1122.579 | 0.0006  | 0.5   | 4.37 | 182533.4 | 7.06 | HUMAN | B72L00 | Protein transport protein Sec3A                                 |
| 9518 | dirMS_041712_NAR_30mM_plus.28404.2840.4   | 2 | 10.41 | 0 | 8.89E+05 |       | (R)ITLLEGE) (R)I L/L/E/E E/S (R)M                      | m.Desmod methionine | 98.47  | 517.2613 | 1033.516 | -0.0007 | -0.7  | 4.25 | 66208.7  | 8.32 | HUMAN | P04264 | Keratin, type II cytoskeletal 1                                 |
| 9519 | dirMS_041712_NAR_40mM_plus.11718.11718.2  | 2 | 10.41 | 0 | 7.03E+04 |       | (K)JNVALS) (K)I A/V/A L/S (R)K                         | m.Desmod methionine | 135.1  | 408.7993 | 816.473  | -0.0013 | -1.6  | 9.75 | 21005.6  | 5.12 | HUMAN | Q04760 | Lactoferrin-like lyase                                          |
| 9520 | dirMS_041712_NAR_50mM_plus.11465.11465.1  | 1 | 10.41 | 1 | 1.46E+05 |       | (K)ITVTEI) (K)I V/T/E/S V/L S (R)                      | m.Desmod methionine | 127.75 | 589.6117 | 1614.975 | -0.0003 | -2.1  | 5.56 | 57891.1  | 6.43 | HUMAN | DA1175 | 3-phosphoglycerate dehydrogenase                                |
| 9521 | dirMS_041712_NAR_50mM_plus.14516.14516.3  | 3 | 10.41 | 1 | 4.49E+05 |       | (K)JTEATK) (R)T J/E E/T/V/P/V/P V G G F (K) K          | m.Desmod methionine | 144.3  | 588.644  | 1763.921 | -0.004  | -2.3  | 4.79 | 53757.6  | 5.74 | HUMAN | P15149 | Plectin                                                         |
| 9522 | dirMS_041712_NAR_50mM_plus.15671.15671.3  | 3 | 10.41 | 1 | 1.24E+06 |       | (K)JVGQGA) (K)Q I/G/G/A L/E D S L V L A F A V (K)T     | m.Desmod methionine | 150.05 | 639.6848 | 1917.044 | -0.0042 | -2.2  | 6.04 | 46550.7  | 7.81 | HUMAN | B72C09 | Chaperonin containing TCP1, subunit 7 (Eta), isoform CRA_a      |
| 9523 | dirMS_041712_NAR_50mM_plus.21829.21829.3  | 3 | 10.41 | 1 | 2.08E+05 |       | (R)KJYVLA) (R)K V/L/M E/V/F L A P A (R)K               | m.Desmod methionine | 185.52 | 545.2925 | 1633.869 | -0.0063 | -3.8  | 6.14 | 95051    | 6.63 | HUMAN | B3K0V5 | AP-1 complex subunit gamma-1                                    |
| 9524 | dirMS_041712_NAR_120mM_minus.7048.7048.2  | 2 | 10.41 | 1 | 4.48E+05 |       | (K)JNMAEP) (K)M A/P/V I/P D L S/V/P F L R (K)G         | m.Desmod methionine | 92.42  | 505.7282 | 1031.651 | -0.0021 | -2.1  | 8.6  | 36561.1  | 8.55 | HUMAN | HDY4A  | Sorbitol dehydrogenase                                          |
| 9525 | dirMS_041712_NAR_20mM_plus.7044.7044.2    | 2 | 10.4  | 0 | 4.77E+05 | M281m | (R)JALAEIA) (R)A L I A E/V/A/K/V/L E/D/T/V P R R (R) Q | m.Desmod methionine | 179.79 | 593.2759 | 1160.55  |         |       |      |          |      |       |        |                                                                 |

|      |                                           |   |       |   |                 |                                                |                          |        |          |          |         |      |      |          |             |        |                                                                           |
|------|-------------------------------------------|---|-------|---|-----------------|------------------------------------------------|--------------------------|--------|----------|----------|---------|------|------|----------|-------------|--------|---------------------------------------------------------------------------|
| 9588 | dirMS_041712_NAR_30mM_plus.14787.15028.2  | 2 | 10.37 | 0 | 1.28E+06        | (R)ILCFREG(R)C(F)E/G L(R)S                     | C.Carbonbemifostemyl     | 130.85 | 447.7285 | 894.45   | -0.0005 | -0.5 | 6    | 533778   | 5.74 HUMAN  | Q15149 | Plectin                                                                   |
| 9589 | dirMS_041712_NAR_30mM_plus.14827.18257.2  | 2 | 10.37 | 0 | 2.20E+05        | (K)GVGME(K)C V/E G/LU/DV/VE/NP N(R)V           | C.Carbonbemifostemyl     | 149.4  | 713.3669 | 1425.733 | -0.0007 | -4.7 | 4.14 | 20629.7  | 4.84 HUMAN  | Q13442 | 28 kDa heat- and acid-stable phosphoprotein                               |
| 9590 | dirMS_041712_NAR_40mM_plus.14816.1618.2   | 2 | 10.37 | 0 | 1.03E+05        | (K)YVTAAR(K)Y(L)TV/A/G L(V)A/R                 | C.Carbonbemifostemyl-m3d | 161.77 | 292.139  | 1039.92  | -0.0007 | -1.3 | 8.59 | 33421.3  | 6.44 HUMAN  | P15024 | Tubulin beta chain                                                        |
| 9591 | dirMS_041712_NAR_40mM_plus.25544.5544.2   | 2 | 10.37 | 0 | 2.45E+05 M29m9  | (N)KMMN(K)M(N)M(A)C D(P)R(H)                   | C.Carbonbemifostemyl-m3d | 89.2   | 541.2145 | 1065.427 | 15.9943 | 0.6  | 5.84 | 50199.4  | 8.74 HUMAN  | AKN22  | Tubulin beta-3 chain-like protein LOC206334                               |
| 9592 | dirMS_041712_NAR_50mM_plus.18966.18966.3  | 3 | 10.37 | 1 | 2.89E+05        | (K)LAFLAQ(K)LA(L)A/G I(G)E V V D(R)K           | C.Carbonbemifostemyl     | 168    | 520.3019 | 1558.895 | -0.004  | -2.6 | 6.07 | 266161   | 5.68 HUMAN  | EP9PU0 | Epiplakin                                                                 |
| 9593 | dirMS_041712_NAR_50mM_plus.21431.21431.3  | 3 | 10.37 | 1 | 1.155E+05       | (K)ALFEV(K)LA(L)P/E V/W P/E L L T E A K(E)     | C.Carbonbemifostemyl     | 182.65 | 615.9987 | 1845.984 | -0.0029 | -1.6 | 4.32 | 65036    | 6.27 HUMAN  | EP9PU3 | Phosphoribosylaminimidazolecarboxamide formyltransferase                  |
| 9594 | dirMS_041712_NAR_50mM_plus.57165.5716.3   | 3 | 10.37 | 1 | 1.531E+05 M131m | (R)IDSGDP(R)K(D)G/DV/P D/OA/V Q(K)R(L)         | C.Carbonbemifostemyl-m3d | 87.98  | 499.8888 | 1481.562 | 15.9525 | -1.1 | 8.59 | 33421.3  | 6.44 HUMAN  | P15024 | Osmoplin                                                                  |
| 9595 | dirMS_041712_NAR_40mM_minus.10590.10855.3 | 3 | 10.36 | 0 | 1.08E+05        | (R)DLSHG(R)D L S H G/DV/VIA/V Q(S)A K(D)       | C.Carbonbemifostemyl     | 147.28 | 528.9384 | 1584.805 | -0.0044 | -2.8 | 5.21 | 29110.6  | 4.57 HUMAN  | P12004 | Proliferating cell nuclear antigen                                        |
| 9596 | dirMS_041712_NAR_50mM_minus.13091.13091.3 | 3 | 10.37 | 1 | 2.73E+04        | (K)YVSSV(K)Y V/S S V I D K V E G/E S A(K)      | C.Carbonbemifostemyl     | 142.28 | 506.6413 | 1709.907 | 0.0025  | 1.5  | 6.04 | 29938.9  | 6.07 HUMAN  | HOYCO  | 26S protease regulatory subunit 10B (Fragment)                            |
| 9597 | dirMS_041712_NAR_50mM_minus.7911.7911.3   | 3 | 10.36 | 1 | 1.26E+05        | (K)LDGSP(K)L I)D/G P S/T/E K D O E K(K)        | C.Carbonbemifostemyl     | 112    | 520.5988 | 1559.78  | -0.0041 | -2.6 | 4.11 | 12611.4  | 8.8 HUMAN   | ESR57  | Transcription elongation factor A protein 1                               |
| 9598 | dirMS_041712_NAR_60mM_minus.7554.7554.3   | 3 | 10.36 | 0 | 4.90E+04        | (R)KLSGDR(R)D S L G H P/P P P/P P O R(R)V      | C.Carbonbemifostemyl     | 101.33 | 495.2483 | 1483.729 | 0.0015  | 1    | 5.32 | 12758.7  | 4.21 HUMAN  | C3B380 | cAMP-dependent protein kinase type II-alpha regulatory subunit (Fragment) |
| 9599 | dirMS_041712_NAR_60mM_minus.8986.8986.3   | 3 | 10.36 | 1 | 3.60E+05 M230m  | (R)KLSGDR(R)D S L G H P/P P P/P P O R(R)V      | C.Carbonbemifostemyl     | 119.3  | 653.6133 | 1921.897 | -0.0012 | -3.2 | 4.83 | 20699.4  | 6.01 HUMAN  | ETVW1  | Tubulin beta chain                                                        |
| 9600 | dirMS_041712_NAR_60mM_minus.9340.9340.3   | 3 | 10.36 | 1 | 1.60E+05        | (R)PTPKA(R)T/P P K E A V/A/M/E S/V A(K)        | C.Carbonbemifostemyl     | 111.93 | 494.5814 | 1481.73  | -0.0008 | -0.5 | 5.81 | 57204.9  | 6.01 HUMAN  | FSGVW6 | T-complex protein 1 subunit beta                                          |
| 9601 | dirMS_041712_NAR_120mM_plus.4851.4851.3   | 3 | 10.36 | 1 | 3.66E+05        | (R)RLRAE(R)R A E T E)G(Q)G/Q/Q/R(K)            | C.Carbonbemifostemyl     | 76.6   | 482.2449 | 1444.714 | 0.0063  | 4.3  | 4.79 | 533778   | 5.74 HUMAN  | Q15149 | Plectin                                                                   |
| 9602 | dirMS_041712_NAR_20mM_plus.14592.14592.2  | 2 | 10.36 | 0 | 4.50E+04 M25m   | (R)ISDmD(R)S L/D m)D/S I L E V K(A)            | m.Oxidized methionine    | 171.77 | 668.8371 | 1320.671 | 15.9954 | 0.3  | 4.03 | 37296.3  | 5.3 HUMAN   | FBVU64 | Keratin, type II cytoskeletal 8                                           |
| 9603 | dirMS_041712_NAR_20mM_plus.19073.19073.3  | 3 | 10.36 | 0 | 2.07E+05        | (R)ITLTSQ(K)T L E V/E P/D P/L Q A A/F K(A)     | C.Carbonbemifostemyl     | 202.57 | 583.5485 | 1765.943 | -0.0003 | -1.7 | 5.66 | 120546   | 6.82 HUMAN  | OS5486 | Protein transport protein Sec24A                                          |
| 9604 | dirMS_041712_NAR_30mM_plus.11776.11776.2  | 2 | 10.36 | 0 | 2.78E+06        | (K)LSLDG(K)U(S)D/G/V A L V K(A)                | C.Carbonbemifostemyl     | 115.52 | 451.2712 | 910.535  | -0.0002 | -0.2 | 5.84 | 61224.7  | 5.7 HUMAN   | P10809 | 60 kDa heat shock protein, mitochondrial                                  |
| 9605 | dirMS_041712_NAR_30mM_plus.12819.12819.2  | 2 | 10.36 | 0 | 2.25E+05        | (K)KSPVFK(K)S K I P V/S E S)I L S(D)           | C.Carbonbemifostemyl     | 120.0  | 598.2946 | 1195.584 | -0.0022 | -1.8 | 4.67 | 112264   | 5.09 HUMAN  | 060220 | Mitochondrial import inner membrane translocase subunit TimbA             |
| 9606 | dirMS_041712_NAR_30mM_plus.18174.18174.2  | 2 | 10.36 | 0 | 2.80E+05        | (R)YVPA(L)R(N)P A/L A/E L N L(R)S              | C.Carbonbemifostemyl     | 147.88 | 605.3509 | 1209.695 | -0.0005 | -0.4 | 5.97 | 20206.6  | 4.67 HUMAN  | EP9K5  | Ribonuclease inhibitor (Fragment)                                         |
| 9607 | dirMS_041712_NAR_30mM_plus.19132.19132.2  | 2 | 10.36 | 0 | 3.59E+04        | (K)DQATK(K)D A G I)T)A/G L(V)A/L(R)            | C.Carbonbemifostemyl     | 153.85 | 600.3411 | 1159.674 | 0.0007  | 0.6  | 5.84 | 17973    | 5.16 HUMAN  | EP9F5  | Heat shock cognate 71 kDa protein (Fragment)                              |
| 9608 | dirMS_041712_NAR_40mM_plus.16370.16370.3  | 3 | 10.36 | 1 | 3.74E+05        | (R)ICTDPO(R)C T/D)P Q T G L C/L D V/R K(K)     | C.Carbonbemifostemyl     | 163.12 | 662.6815 | 1586.04  | -0.0059 | -5   | 6.07 | 533778   | 5.74 HUMAN  | Q15149 | Plectin                                                                   |
| 9609 | dirMS_041712_NAR_40mM_plus.20065.20065.3  | 3 | 10.36 | 1 | 5.88E+05        | (K)EJGG(L)K(E)G G L(G)P/L N P L L A D V T R(L) | C.Carbonbemifostemyl     | 189.8  | 631.0288 | 1891.076 | -0.0041 | -2.2 | 6.17 | 15252.2  | 5.82 HUMAN  | AN6W5  | Peroxiredoxin 2, isoform CRA_a                                            |
| 9610 | dirMS_041712_NAR_50mM_plus.11708.11708.3  | 3 | 10.36 | 1 | 1.26E+05        | (K)LPDPS(K)I)D)P S/G D K I(E)K(A)              | C.Carbonbemifostemyl     | 182.77 | 443.2514 | 1327.747 | -0.0003 | -5.4 | 4.56 | 16550    | 9.47 HUMAN  | DR696  | 40S ribosomal protein 53a                                                 |
| 9611 | dirMS_041712_NAR_60mM_plus.5373.5373.2    | 2 | 10.36 | 1 | 8.14E+04        | (K)DLSDFP(K)C D)S/D)P S A E D)R V(K)           | C.Carbonbemifostemyl     | 85.72  | 733.1313 | 1465.622 | -0.0021 | -2.1 | 4.23 | 40217.0  | 5.43 HUMAN  | HOY265 | Alpha-2-HS-glycoprotein                                                   |
| 9612 | dirMS_041712_NAR_120mM_plus.12116.12116.2 | 2 | 10.35 | 0 | 2.74E+05        | (R)HEVQ(R)E(R)E)C V)T G L S(L)K(L)             | C.Carbonbemifostemyl     | 100    | 584.3888 | 1167.673 | -0.0029 | -2.5 | 6.75 | 39066    | 6.61 HUMAN  | AP6VW5 | Selenin binding protein 1 (Fragment)                                      |
| 9613 | dirMS_041712_NAR_20mM_minus.10483.10483.2 | 2 | 10.35 | 0 | 1.42E+05        | (R)YIYVDV(R)Y I)Y)V)D)G S E P(R)A              | C.Carbonbemifostemyl     | 152.95 | 617.3216 | 1233.647 | -0.0115 | -9.3 | 4.37 | 39066    | 6.61 HUMAN  | AP6VW5 | Selenin binding protein 1 (Fragment)                                      |
| 9614 | dirMS_041712_NAR_30mM_minus.12568.12568.2 | 2 | 10.35 | 0 | 2.85E+05        | (R)INGLVY(R)R(N)L G)Y V Y V(K)                 | C.Carbonbemifostemyl     | 122.08 | 403.7423 | 806.477  | -0.0003 | -0.3 | 8.59 | 96827.3  | 5.58 HUMAN  | EP9KU7 | Neutral alpha-glucosidase AB                                              |
| 9615 | dirMS_041712_NAR_30mM_minus.17849.17849.2 | 2 | 10.35 | 0 | 7.98E+04        | (R)ILDFE(R)R I)D)Q)F)R(R)                      | C.Carbonbemifostemyl     | 151.38 | 476.7657 | 952.525  | -0.0001 | -1   | 6    | 232239.1 | 5.52 HUMAN  | F2Z2U8 | Myosin-14                                                                 |
| 9616 | dirMS_041712_NAR_30mM_minus.1955.1955.3   | 3 | 10.35 | 0 | 5.10E+05        | (R)YVYV(R)Y I)D)N)D)G L E S(R)                 | C.Carbonbemifostemyl     | 106.58 | 558.5911 | 1151.588 | -0.0051 | -6.6 | 4.07 | 60674    | 6.07 HUMAN  | F2Z2U8 | Myosin-14                                                                 |
| 9617 | dirMS_041712_NAR_50mM_minus.20505.9050.3  | 3 | 10.35 | 1 | 1.91E+05        | (R)ILVYV(R)Y I)D)N)D)G L E S(R)                | C.Carbonbemifostemyl     | 115.83 | 552.6528 | 1055.944 | -0.001  | -0   | 8.72 | 10815.7  | 10.72 HUMAN | F2Z288 | 60S ribosomal protein L35                                                 |
| 9618 | dirMS_041712_NAR_60mM_minus.17839.17839.3 | 3 | 10.35 | 1 | 3.41E+05        | (K)YKLEVY(K)Y G L E V A)N)A/L Q)K(S)           | C.Carbonbemifostemyl     | 159.68 | 496.9631 | 1488.878 | -0.0037 | -2.5 | 8.5  | 482863.6 | 6.07 HUMAN  | Q12955 | Ankyrin-3                                                                 |
| 9619 | dirMS_041712_NAR_60mM_minus.7881.7881.3   | 3 | 10.35 | 1 | 4.85E+05        | (R)YLALEA(R)Y)A V/A E)W/E)K(R)A                | C.Carbonbemifostemyl     | 104.22 | 412.8902 | 1238.658 | -0.0022 | -1.8 | 6.14 | 28473.3  | 4.8 HUMAN   | PE1891 | 14-3-3 protein gamma                                                      |
| 9620 | dirMS_041712_NAR_60mM_minus.8842.8842.3   | 3 | 10.35 | 0 | 4.83E+05        | (K)HPIK(R)K)Y)A V/A E)W/E)K(R)A                | C.Carbonbemifostemyl     | 99.23  | 408.8413 | 1219.564 | -0.0022 | -1.9 | 8.82 | 34944.6  | 6.02 HUMAN  | PE1891 | 14-3-3 protein gamma                                                      |
| 9621 | dirMS_041712_NAR_20mM_plus.12978.12978.2  | 2 | 10.35 | 0 | 2.33E+04        | (R)KADMSY(K)S V/D)S)A/V)P I G(R)               | C.Carbonbemifostemyl     | 162.33 | 513.8007 | 1026.594 | -0.0001 | -0.1 | 5.88 | 48551.3  | 9.2 HUMAN   | K7EK63 | ATP synthase subunit alpha, mitochondrial                                 |
| 9622 | dirMS_041712_NAR_20mM_plus.15641.15641.2  | 2 | 10.35 | 0 | 4.98E+03        | (R)JSPFYV(R)S S)Y)Y)V)N)G L)Y)U)S G Q(K)       | C.Carbonbemifostemyl     | 180.83 | 755.8818 | 1470.759 | -0.0024 | -1.6 | 8.31 | 17630.6  | 11.62 HUMAN | IL3L05 | Profilin-1 (Fragment)                                                     |
| 9623 | dirMS_041712_NAR_20mM_plus.18723.18723.3  | 3 | 10.35 | 0 | 1.13E+05        | (K)WEGD(K)Y I)G N Q)S)W)N)E)A)P)A)R(K)         | C.Carbonbemifostemyl     | 200.63 | 577.9842 | 1731.399 | -0.0008 | -0.4 | 5.97 | 36157.9  | 8.65 HUMAN  | Q13011 | Delta(3)-Delta(2)-Delta(1)-dienoyl-CoA isomerase, mitochondrial           |
| 9624 | dirMS_041712_NAR_20mM_plus.19144.19144.3  | 3 | 10.35 | 0 | 1.44E+05        | (R)KVGNDI(R)E G D)V)A)T)U)E)S)R(K)             | C.Carbonbemifostemyl     | 203.47 | 680.8536 | 1360.696 | -0.0044 | -3.3 | 4    | 7898     | 11.1 HUMAN  | PE2857 | 40S ribosomal protein S28                                                 |
| 9625 | dirMS_041712_NAR_20mM_plus.19350.19350.3  | 3 | 10.35 | 0 | 9.30E+04        | (R)IALIAGG(R)A L)I)A G G A)P)E)I)A)A)R(L)      | C.Carbonbemifostemyl     | 209.05 | 517.6245 | 1550.89  | -0.0011 | -0.7 | 4.53 | 42755    | 7.81 HUMAN  | 8T274  | T-complex protein 1 subunit delta                                         |
| 9626 | dirMS_041712_NAR_20mM_plus.6982.6995.2    | 2 | 10.35 | 0 | 1.09E+05        | (K)AGTAGE(K)A G)I)A)G D)A)P)R(A)               | C.Carbonbemifostemyl     | 114.77 | 488.3707 | 976.448  | 0.0058  | 6    | 4.21 | 123097.1 | 5.83 HUMAN  | AS450  | POTE ankyrin domain family member F                                       |
| 9627 | dirMS_041712_NAR_20mM_plus.7436.7436.2    | 2 | 10.35 | 0 | 2.40E+05        | (R)ITLTSQ(K)T L E V/E)E)A)R(L)                 | C.Carbonbemifostemyl     | 119.57 | 567.7865 | 1134.564 | -0.002  | 1.8  | 4.25 | 33940.9  | 9.27 HUMAN  | F5H308 | Lactate dehydrogenase                                                     |
| 9628 | dirMS_041712_NAR_30mM_plus.12713.12713.2  | 2 | 10.35 | 0 | 6.43E+04        | (R)YLDGLY(R)Y)I)D)G)U)T)A)E)R(T)               | C.Carbonbemifostemyl     | 118.67 | 519.2668 | 1037.526 | -0.0001 | -0.1 | 4.37 | 65737    | 8.32 HUMAN  | F35908 | Keratin, type I cytoskeletal 2 epidermal                                  |
| 9629 | dirMS_041712_NAR_30mM_plus.22469.22469.3  | 3 | 10.35 | 0 | 1.47E+05        | (R)ISDmD(R)S L/D m)D/S I L E V K(K)            | C.Carbonbemifostemyl     | 171.77 | 668.8371 | 1320.671 | -0.0002 | -0.1 | 4.07 | 37296.3  | 5.3 HUMAN   | FBVU64 | Keratin, type I cytoskeletal 8                                            |
| 9630 | dirMS_041712_NAR_30mM_plus.5398.5398.2    | 2 | 10.35 | 0 | 6.43E+04        | (R)ISDmD(R)S L/D m)D/S I L E V K(K)            | C.Carbonbemifostemyl     | 171.77 | 668.8371 | 1320.671 | -0.0002 | -0.1 | 4.07 | 37296.3  | 5.3 HUMAN   | FBVU64 | Keratin, type I cytoskeletal 8                                            |
| 9631 | dirMS_041712_NAR_40mM_plus.7108.7108.2    | 2 | 10.35 | 0 | 4.55E+04        | (R)ISSYLEP(R)S I)Y)A)E)S)P)R(G)                | C.Carbonbemifostemyl     | 110.58 | 469.7437 | 938.458  | -0.0003 | -4.6 | 5.72 | 160853.1 | 6.11 HUMAN  | F8VU51 | YLP motif-containing protein 1                                            |
| 9632 | dirMS_041712_NAR_50mM_plus.17608.17608.3  | 3 | 10.35 | 1 | 2.09E+05        | (R)EVLQLE(R)Y V)Q)A)E)R)E)A)R D L V(S)K(E)     | C.Carbonbemifostemyl     | 160.73 | 410.3302 | 1282.965 | 0.011   | 6    | 4.25 | 45984.6  | 6.24 HUMAN  | BAE1G6 | Galectin-3                                                                |
| 9633 | dirMS_041712_NAR_60mM_plus.16195.16195.3  | 3 | 10.35 | 0 | 4.88E+05        | (K)ITTTAA(R)K)Y)A V/A E)W/E)K(R)A              | C.Carbonbemifostemyl     | 141.72 | 433.5839 | 1298.722 | 0.0122  | 9.4  | 9.44 | 32589.6  | 4.86 HUMAN  | Q52U10 | Programmed cell death protein 6 (Fragment)                                |
| 9634 | dirMS_041712_NAR_60mM_plus.6811.6827.3    | 3 | 10.35 | 0 | 6.59E+05        | (R)KLVGGG(R)K V)P G G L)Q)G)Q)D)R(G)           | C.Carbonbemifostemyl     | 94.18  | 457.5756 | 1370.702 | 0.0112  | 8.2  | 6.17 | 180453.7 | 6.04 HUMAN  | HOY02  | YLP motif-containing protein 1 (Fragment)                                 |
| 9635 | dirMS_041712_NAR_120mM_minus.9983.9983.3  | 3 | 10.35 | 0 | 4.50E+05        | (R)JRSRNT(R)S R)Y)N)D)E)M)A)E)R(K)             | C.Carbonbemifostemyl     | 108.62 | 450.5556 | 1349.648 | 0.0045  | 3.3  | 4.68 | 51260.6  | 5.39 HUMAN  | PE1978 | Heterogeneous nuclear ribonucleoprotein K                                 |
| 9636 | dirMS_041712_NAR_50mM_minus.10681.10826.3 | 3 | 10.34 | 1 | 3.29E+05        | (K)NIVAM(K)K Q)I)A)M)P)N T)N)T)V)D)A K(R)L     | C.Carbonbemif            |        |          |          |         |      |      |          |             |        |                                                                           |



|      |                                           |   |       |                 |                                                       |        |          |          |         |      |      |          |       |       |        |                                                         |
|------|-------------------------------------------|---|-------|-----------------|-------------------------------------------------------|--------|----------|----------|---------|------|------|----------|-------|-------|--------|---------------------------------------------------------|
| 9806 | drMS_041712_NAR_50mM_plus2.5961.5961.3    | 3 | 10.26 | 0.873E+04       | (K)IAVTEG(Q)K(V)ITE/Q/Q/H/L/S/E N(E)R(N)              | 95.48  | 533.5846 | 1598.741 | -0.0013 | -0.8 | 4.48 | 28196    | 4.76  | HUMAN | P31946 | 14-3-3 protein beta/alpha                               |
| 9807 | drMS_041712_NAR_50mM_plus2.7292.7292.3    | 3 | 10.26 | 0.168E+05       | (R)SSGSE(R)S G/S Q/E/L/D/V/K/P/R S/A S P Q R(S)       | 103.85 | 634.6443 | 1901.92  | -0.0016 | -0.8 | 4.68 | 22779.5  | 12.08 | HUMAN | DL326  | Serine/arginine repetitive matrix protein 2             |
| 9808 | drMS_041712_NAR_50mM_plus2.11928.11928.3  | 3 | 10.26 | 0.979E+04       | (K)YFVTE(K)K(V)E/V/L/D/L/S/E/R(N)                     | 119.4  | 519.2622 | 1594.808 | -0.0019 | -1.9 | 4.4  | 1192.2   | 6.58  | HUMAN | AKN221 | Nucleosome assembly protein 1-like 4 (Fragment)         |
| 9809 | drMS_041712_NAR_60mM_plus.12521.12521.3   | 3 | 10.26 | 1.354E+06       | (R)KSSQLE(K)K V K L E A(E)I(A)T/R(K)                  | 122.98 | 431.6782 | 1292.721 | -0.0008 | -0.6 | 6.11 | 43773.3  | 5.26  | HUMAN | F8V219 | Keratin, type I cytoskeletal 18                         |
| 9810 | drMS_041712_NAR_60mM_plus.16504.16504.3   | 3 | 10.26 | 1.369E+05       | (I)MKNKLS(-)M K/L N I S/P/P/A/T G C Q K(L)            | 142.85 | 532.2733 | 1594.808 | -0.0026 | -1.9 | 10   | 10471.9  | 5.45  | HUMAN | AZ3A87 | 40S ribosomal protein S6                                |
| 9811 | drMS_041712_NAR_120mM_minus.13843.13843.3 | 3 | 10.25 | 1.194E+05       | (R)IAWODE(R)I(W)D V/E/F/R/D G G F(R)                  | 129.68 | 537.2494 | 1609.724 | -0.0005 | -5.7 | 4.1  | 80885.1  | 7.31  | HUMAN | PO5165 | Propionyl-CoA carboxylase alpha chain, mitochondrial    |
| 9812 | drMS_041712_NAR_120mM_minus.4541.4541.2   | 3 | 10.25 | 0.238E+06 M6m   | (R)HSDQ(R)R(V)R(G)G V M V G/V G/V G(V)R(N)            | 73.83  | 502.2834 | 1171.571 | 21.9585 | -1   | 8.76 | 2345.9   | 5.18  | HUMAN | AKN121 | Actin, alpha skeletal muscle                            |
| 9813 | drMS_041712_NAR_20mM_minus.9713.9713.2    | 2 | 10.25 | 0.157E+05       | (K)ILSLEE(K)K L S(E)Y/P G T G D(L) R(L)               | 147.78 | 643.8318 | 1266.659 | -0.0023 | -1.8 | 4.14 | 24661.61 | 5.68  | HUMAN | E9P910 | Epiplakin                                               |
| 9814 | drMS_041712_NAR_30mM_minus.11379.11379.2  | 2 | 10.25 | 0.219E+05       | (K)JATAVM(K)K A T A V I M P D G Q F(K)D)              | 115.47 | 582.7922 | 1164.572 | 0.0054  | -4.6 | 5.88 | 22338.2  | 8.65  | HUMAN | OQ6830 | Peroxidoxin-1                                           |
| 9815 | drMS_041712_NAR_30mM_minus.2571.5721.2    | 2 | 10.25 | 0.413E+04       | (R)IAADEE(R)R(A)E/D/E/D D V/D/D/T(K)K)                | 85.35  | 179.2778 | 1437.55  | -0.0016 | -1.1 | 3.5  | 134666.2 | 3.71  | HUMAN | B8Z21  | Thymosin alpha-1                                        |
| 9816 | drMS_041712_NAR_30mM_minus.10058.10058.3  | 3 | 10.25 | 1.836E+05       | (R)KMGDEE(R)R(Q)M C K E I T/D/A/L/P/S T M K(N)        | 121.62 | 516.9426 | 1548.812 | 0.0008  | 0.5  | 8.5  | 32616.5  | 5.18  | HUMAN | AKN176 | Actin, alpha skeletal muscle                            |
| 9817 | drMS_041712_NAR_50mM_minus.11328.11328.3  | 3 | 10.25 | 1.114E+05       | (K)AVAFSP(K)K(V)A V G A P P V T L R(K)                | 132    | 545.925  | 1289.746 | -0.0009 | -4.6 | 8.44 | 8581.7   | 7.95  | HUMAN | F17826 | 6-phosphofructokinase, liver type                       |
| 9818 | drMS_041712_NAR_60mM_minus.11865.11864.3  | 3 | 10.25 | 0.171E+06       | (K)SQSDNH(K)S Q I H D (V)I/L/V/G/S T(R)               | 126.72 | 494.6084 | 1481.807 | 0.0036  | -2.4 | 6.46 | 45508.6  | 5.5   | HUMAN | AKB7Q2 | Heat shock cognate 71 kDa protein                       |
| 9819 | drMS_041712_NAR_60mM_minus.14441.14441.3  | 3 | 10.25 | 1.271E+05       | (R)ITEMEN(R)I(M)E M N F V L/A/L(K)D)                  | 140.07 | 494.2594 | 1480.772 | -0.0079 | -5.4 | 4.78 | 13588.1  | 4.66  | HUMAN | F8V6P7 | Keratin, type II cytoskeletal 8 (Fragment)              |
| 9820 | drMS_041712_NAR_120mM_plus.11667.11689.4  | 4 | 10.25 | 2.386E+04       | (K)KYVDQ(K)K(V)Q L/D/L/D/G F K E I L S Y(R)           | 112.93 | 425.4899 | 1698.939 | -0.0007 | -0.4 | 6.12 | 20629.7  | 8.84  | HUMAN | CL3442 | 28 kDa heat- and acid-stable phosphoprotein             |
| 9821 | drMS_041712_NAR_120mM_plus.9945.9945.4    | 4 | 10.25 | 0.244E+05       | (R)GHAAT(R)G H A A V T S O I P K P T U I L V S G(K)K) | 105.2  | 461.2344 | 1491.939 | -0.118  | -7.5 | 6.5  | 15844.7  | 6.65  | HUMAN | ESR06  | Glutathione reductase, mitochondrial (Fragment)         |
| 9822 | drMS_041712_NAR_20mM_plus.12733.1273.2    | 2 | 10.25 | 0.251E+05 M316m | (R)JSEFT(R)R(S)S/Q/T/A m F R(N)                       | 161.18 | 623.3012 | 1229.598 | 15.9688 | 1.5  | 6    | 42831.5  | 4.86  | HUMAN | AKK554 | HSC90S150A, isoform CRA_f                               |
| 9823 | drMS_041712_NAR_20mM_plus.14441.14441.3   | 3 | 10.25 | 0.118E+05 M174m | (K)JAMGA(K)K m G A A Q(V)I V V D T L S A T(R)I(L)     | 171.28 | 535.9457 | 1589.832 | 15.991  | -2.5 | 5.88 | 36856.1  | 8.55  | HUMAN | HDY4A  | Sorbitol dehydrogenase                                  |
| 9824 | drMS_041712_NAR_20mM_plus.7418.7418.3     | 3 | 10.25 | 0.214E+05       | (K)ITGDAP(K)G T G A P A V Q(V)S/T/A A N K(N)          | 119.53 | 476.8963 | 1428.675 | -0.001  | -0.7 | 8.16 | 11447.2  | 9.81  | HUMAN | CJ9F87 | Cytochrome c (Fragment)                                 |
| 9825 | drMS_041712_NAR_20mM_plus.9140.9140.2     | 2 | 10.25 | 0.217E+05       | (R)YFVTE(R)R L V T V A W N Q T C(K)E)                 | 133.3  | 572.3399 | 1143.673 | -0.0007 | -0.6 | 8.72 | 10815.7  | 10.72 | HUMAN | F22888 | 60S ribosomal protein L35                               |
| 9826 | drMS_041712_NAR_30mM_plus2.10388.10331.2  | 2 | 10.25 | 0.222E+05       | (R)RISYSP(R)S L I S Y S P A M R(E)                    | 108.27 | 519.2668 | 1037.526 | 0.0001  | 0.1  | 5.72 | 9057.8   | 12.09 | HUMAN | DL34U6 | Serine/arginine repetitive matrix protein 2 (Fragment)  |
| 9827 | drMS_041712_NAR_30mM_plus2.11387.11387.2  | 2 | 10.25 | 0.640E+05       | (R)MGESE(R)M G S Q E L P L K E E P S V S(K)M)         | 113.7  | 561.7585 | 1122.51  | 0.0002  | 0.1  | 4.03 | 9225.3   | 9.16  | HUMAN | PE3220 | 40S ribosomal protein S21                               |
| 9828 | drMS_041712_NAR_30mM_plus2.18209.18209.2  | 2 | 10.25 | 0.131E+05       | (R)SIVDEE(R)S Q I V D I E F L F S V(R)                | 149.2  | 618.8302 | 1322.659 | -0.0005 | -4.2 | 4.25 | 53377.8  | 5.74  | HUMAN | Q15149 | Plectin                                                 |
| 9829 | drMS_041712_NAR_30mM_plus2.7881.8258.2    | 2 | 10.25 | 0.113E+06       | (R)IDYDDE(R)R I Q D I D M S P R(K)                    | 96.22  | 499.6972 | 1998.888 | -0.0013 | -1.3 | 3.93 | 51260.6  | 5.39  | HUMAN | PE1878 | Heterogeneous nuclear ribonucleoprotein K               |
| 9830 | drMS_041712_NAR_40mM_plus2.12929.12929.3  | 3 | 10.25 | 1.122E+04       | (K)GESSG(K)K Q E L S P L K E E P S V S(K)M)           | 142.55 | 604.3276 | 1810.98  | -0.0114 | -6.3 | 4.78 | 193384.1 | 4.76  | HUMAN | BD0478 | MyL1/myocardin-2, isoform CRA_a                         |
| 9831 | drMS_041712_NAR_50mM_plus2.6644.6644.3    | 3 | 10.25 | 0.518E+05 M434m | (R)LESgMc(R)L S E S G M Q N M S A H T(K)R)            | 99.12  | 497.9026 | 1475.698 | 15.9951 | 0.1  | 6.75 | 56607.4  | 5.37  | HUMAN | F8V804 | Keratin, type II cytoskeletal 8                         |
| 9832 | drMS_041712_NAR_50mM_plus2.8286.8310.3    | 3 | 10.25 | 0.515E+05       | (R)ILPKXP(R)I E P K P Q P P V A E A T P(S)            | 110.33 | 543.9631 | 1629.896 | -0.0211 | -1.3 | 6.14 | 14468.1  | 6.76  | HUMAN | K7E151 | Septin-9 (Fragment)                                     |
| 9833 | drMS_041712_NAR_60mM_plus.12188.12188.3   | 3 | 10.25 | 0.938E+05       | (K)IDEAVA(K)I D E A V E/A/L/V/L/K(L)                  | 121.18 | 418.2255 | 1252.653 | 0.0008  | -7   | 4.65 | 45228.3  | 6.03  | HUMAN | F5H737 | Adenosylhomocysteinase                                  |
| 9834 | drMS_041712_NAR_60mM_plus.12035.12035.2   | 2 | 10.24 | 0.213E+05 M185m | (R)ILASD(R)R I S L S D V L R P(L)                     | 147.12 | 576.8357 | 1141.633 | -0.0019 | -0.4 | 5.86 | 986.8    | 5.98  | HUMAN | AKB828 | Putative tubulin beta chain-like protein ENSP0000230377 |
| 9835 | drMS_041712_NAR_60mM_plus2.6669.6669.2    | 2 | 10.24 | 0.417E+05       | (R)ILASD(R)R I S L S D V L R P(L)                     | 108.25 | 419.2627 | 837.447  | -0.0008 | -0.4 | 5.83 | 43773.3  | 5.26  | HUMAN | F8V219 | Keratin, type I cytoskeletal 18                         |
| 9836 | drMS_041712_NAR_50mM_minus.8552.8552.3    | 3 | 10.24 | 1.243E+05       | (R)JAGTGV(R)R G T G V D W L E J A T R K(G)            | 115.66 | 539.5119 | 1616.824 | -0.0027 | -1.7 | 4.56 | 57391.2  | 6.29  | HUMAN | DA3175 | D-3-phosphoglycerate dehydrogenase                      |
| 9837 | drMS_041712_NAR_50mM_minus.9425.9425.2    | 2 | 10.24 | 1.715E+05       | (R)IDGK(L)R G K I L I V S E S D V S V L P R P(L)      | 121.97 | 737.3927 | 1473.78  | -0.0014 | -0.9 | 4.56 | 56607.4  | 5.37  | HUMAN | F8V804 | Keratin, type II cytoskeletal 8                         |
| 9838 | drMS_041712_NAR_50mM_minus.2454.2454.2    | 2 | 10.24 | 1.118E+05 M174m | (R)IGHNTR(R)G H N T R H D D R(D)R)                    | 184.3  | 619.2589 | 1810.98  | -0.0114 | -5.3 | 5.38 | 12464.2  | 6.32  | HUMAN | F5H823 | Tubulin alpha-C chain                                   |
| 9839 | drMS_041712_NAR_20mM_plus.13924.13924.2   | 2 | 10.24 | 0.184E+04       | (R)IGLCMA(R)I G L C A V I Q A E S E A T(K)            | 167.25 | 644.8389 | 1288.668 | 0.0027  | -2.1 | 6    | 18529.2  | 9.98  | HUMAN | EP94A5 | 40S ribosomal protein S3                                |
| 9840 | drMS_041712_NAR_20mM_plus.15674.15674.3   | 3 | 10.24 | 0.211E+05       | (R)IGVDSO(R)R V V D S P E D I N L S R(L)              | 179.38 | 505.2667 | 1513.786 | -0.0001 | 0.1  | 4.03 | 74494.3  | 7.79  | HUMAN | F5H897 | Heat shock protein 75 kDa, mitochondrial                |
| 9841 | drMS_041712_NAR_20mM_plus.16443.16443.2   | 2 | 10.24 | 0.833E+04       | (R)JLSTV(R)R I G S T F I A Z H M N L D Y(K)K)         | 184.9  | 713.8819 | 1426.758 | -0.0011 | -0.8 | 5.83 | 77799.9  | 9.09  | HUMAN | PS2272 | Heterogeneous nuclear ribonucleoprotein M               |
| 9842 | drMS_041712_NAR_20mM_plus.18159.18159.2   | 2 | 10.24 | 0.102E+05       | (R)JLSTV(R)R I G S T F I A Z H M N L D Y(K)K)         | 196.63 | 808.419  | 1615.836 | -0.0053 | -3.3 | 4.03 | 27549.9  | 4.99  | HUMAN | EP9014 | Tubulin beta chain                                      |
| 9843 | drMS_041712_NAR_20mM_plus.18209.18209.2   | 2 | 10.24 | 0.983E+04       | (R)KIPGSG(R)K I P G S G I A M T L R(K)                | 196.67 | 508.8548 | 1138.704 | -0.0014 | -1.3 | 8.8  | 26161    | 5.68  | HUMAN | EP9104 | Epiplakin                                               |
| 9844 | drMS_041712_NAR_20mM_plus.19236.19236.3   | 3 | 10.24 | 0.277E+05       | (R)LIAGTQ(R)R I A G T G P L V E I U E A V Q S(R)      | 204.3  | 541.9711 | 1623.906 | -0.0017 | -1   | 4.53 | 118930.9 | 5.49  | HUMAN | P23214 | Ubiquitin-like modifier-activating enzyme 1             |
| 9845 | drMS_041712_NAR_20mM_plus.19366.19366.2   | 2 | 10.24 | 0.141E+05       | (R)LIAGVQ(R)R I G A V I V D I P Z A H L G R(R)        | 204.68 | 812.9497 | 1624.891 | 0.0017  | -1   | 4.14 | 15338.4  | 5.51  | HUMAN | K7E1P1 | ATP synthase subunit alpha, mitochondrial (Fragment)    |
| 9846 | drMS_041712_NAR_40mM_plus.11317.11317.3   | 3 | 10.24 | 0.311E+04       | (K)ILQALM(K) Q I A L A I N Q I A J A A H H L K(M)     | 132.83 | 602.981  | 1806.395 | -0.0006 | -3.3 | 4.75 | 156557.7 | 5.52  | HUMAN | Q8B92U | Kinectin                                                |
| 9847 | drMS_041712_NAR_40mM_plus.12980.12980.2   | 2 | 10.24 | 0.312E+04       | (K)ILQALM(K) Q I A L A I N Q I A J A A H H L K(M)     | 141.12 | 543.14   | 1991.911 | -0.0004 | -6.1 | 5.21 | 2134.1   | 6.01  | HUMAN | AKN121 | Adenylyl kinase-2, mitochondrial                        |
| 9848 | drMS_041712_NAR_40mM_plus.14717.14717.2   | 2 | 10.24 | 0.602E+04       | (R)IFGIDG(R)R I F G I I D I G N R(K)                  | 153.32 | 431.7546 | 862.503  | -0.0014 | -1.6 | 5.84 | 22062.7  | 5.66  | HUMAN | P93219 | Peroxidoxin-2                                           |
| 9849 | drMS_041712_NAR_40mM_plus2.15165.15165.3  | 3 | 10.24 | 0.425E+05       | (R)QIFSDH(R)K T I F D H P Q I D P I L N(K)N)          | 156.52 | 574.3118 | 1720.927 | -0.0006 | -3.5 | 5.21 | 138084.9 | 5.52  | HUMAN | Q8V6V6 | Cullin-associated NEDD8-dissociated protein 1           |
| 9850 | drMS_041712_NAR_50mM_plus2.10280.10301.3  | 3 | 10.24 | 1.176E+05       | (R)KQILSLN(R)R E L L A V S M D E K S G(R)K)           | 104.13 | 544.822  | 1631.86  | -0.0024 | -1.5 | 4.68 | 139883.7 | 8.06  | HUMAN | PS3621 | Coatomer subunit alpha                                  |
| 9851 | drMS_041712_NAR_50mM_plus2.14480.14694.3  | 3 | 10.24 | 1.342E+06       | (R)YFVTE(R)R L V T V A W N Q T C(K)E)                 | 144.88 | 528.6537 | 1583.948 | -0.0014 | -0.9 | 9.57 | 13054.7  | 5.59  | HUMAN | EP9914 | 40S ribosomal protein L35                               |
| 9852 | drMS_041712_NAR_50mM_plus2.17131.17131.3  | 3 | 10.24 | 1.932E+05       | (K)DMNPK(K)N D V G V A V L G E L P M R(K)K)           | 158.5  | 509.9448 | 1527.82  | -0.0001 | -0.1 | 6.07 | 29854.8  | 9.49  | HUMAN | CU380  | Regulator of chromosome condensation (Fragment)         |
| 9853 | drMS_041712_NAR_60mM_plus.9383.9383.3     | 3 | 10.24 | 1.491E+05       | (R)RGSNKR(R)G S R K L V H I E A V R(S)                | 107.13 | 448.9043 | 1344.712 | -0.0134 | -10  | 4.79 | 42755    | 7.81  | HUMAN | B7Z274 | T-complex protein 1 subunit delta                       |
| 9854 | drMS_041712_NAR_120mM_minus.16724.16724.3 | 3 | 10.23 | 0.506E+05       | (R)HEALLA(R)R H A A L A V T I L G V S(K)K)            | 105.65 | 438.9182 | 1314.742 | -0.0004 | -0.3 | 6.85 | 50482.3  | 9.31  | HUMAN | PE8104 | Elongation factor 1-alpha 1                             |
| 9855 | drMS_041712_NAR_120mM_minus.19361.19361.3 | 3 | 10.23 | 1.446E+05       | (R)KYNHGL(R)K N I Q I R L R I E E L G S R(K)          | 140.73 | 564.6387 | 1691.896 | -0.0007 | -0.4 | 4.79 | 47510.4  | 7.04  | HUMAN | PE0733 | RNA-enolase                                             |
| 9856 | drMS_041712_NAR_30mM_minus.11637.11637.2  | 2 | 10.23 | 0.256E+04       | (R)KIDNDE(K)K I D N D E L D L S D V L R P(L)          | 116.88 | 500.784  | 1030.523 | -0.0029 | -2.9 | 8.84 | 10200.4  | 5.98  | HUMAN | AKN121 | Coflin 2 (Muscle), isoform CRA_d                        |
| 9857 | drMS_                                     |   |       |                 |                                                       |        |          |          |         |      |      |          |       |       |        |                                                         |







|       |                                            |   |       |                 |                                                       |        |          |          |          |       |      |          |       |       |        |                                                         |
|-------|--------------------------------------------|---|-------|-----------------|-------------------------------------------------------|--------|----------|----------|----------|-------|------|----------|-------|-------|--------|---------------------------------------------------------|
| 10133 | dirMS_041712_NAR_120mM_plus.8906.8906.2    | 2 | 10.08 | 0.581E-05       | (RINGVMP(R)N G V I M P S H F S R I)                   | 99.88  | 566.274  | 1131.536 | 0.0043   | 3.8   | 9.75 | 16060.2  | 1.014 | HUMAN | P39019 | 40S ribosomal protein S19                               |
| 10134 | dirMS_041712_NAR_20mM_plus.16409.16409.2   | 2 | 10.08 | 0.238E-04       | (RVVSEDF(R)N V S E D F V Q D V S A S T K R I)         | 184.55 | 812.905  | 1624.806 | -0.0027  | -1.7  | 4.03 | 11380.5  | 9.18  | HUMAN | P09874 | Poly [ADP-ribose] polymerase 1                          |
| 10135 | dirMS_041712_NAR_20mM_plus.18304.18304.2   | 2 | 10.08 | 0.162E-04       | (RIVVSEDF(R)G V L V L F V S F L G C S T G R I)        | 197.58 | 867.966  | 1734.521 | -0.0027  | -1.9  | 8.71 | 17412.2  | 9.21  | HUMAN | C31637 | Creatine kinase U-type, mitochondrial                   |
| 10136 | dirMS_041712_NAR_30mM_plus.14951.14951.2   | 2 | 10.08 | 0.126E-06       | (RLICRGF(R)C I F E G L R I S)                         | 180.73 | 447.285  | 894.45   | -0.0005  | -0.5  | 6    | 53377.8  | 5.74  | HUMAN | Q15149 | Plectin                                                 |
| 10137 | dirMS_041712_NAR_30mM_plus.22233.22405.2   | 2 | 10.08 | 0.301E-05       | (KJCMPTPT(K)C M P T F Q F F K I)                      | 107.27 | 603.2777 | 1205.548 | -0.0001  | -0.1  | 8.75 | 9680     | 5.77  | HUMAN | B1A1W1 | Thioredoxin                                             |
| 10138 | dirMS_041712_NAR_30mM_plus.9794.9824.2     | 2 | 10.08 | 0.730E-05       | (KIMMNTD(K)M)N T D L S R I)                           | 172.27 | 475.2445 | 949.477  | -0.0046  | -0.4  | 5.59 | 37884.5  | 11.27 | HUMAN | H38M89 | 60S ribosomal protein L4                                |
| 10139 | dirMS_041712_NAR_40mM_plus.2230.7882.3     | 2 | 10.08 | 0.232E-05       | (RISDFPFR(S)G V I P F D E R I)                        | 103.03 | 437.1926 | 873.394  | -0.0022  | -0.2  | 4.37 | 22351.2  | 4.91  | HUMAN | C31639 | Creatine kinase U-type, mitochondrial (Fragment)        |
| 10140 | dirMS_041712_NAR_50mM_plus.11539.11539.3   | 3 | 10.08 | 1.280E-06 M72m  | (RITENHE(R)E T E M E N E F V L K X D I)               | 127.98 | 495.5943 | 1480.772 | -0.1968  | -1.2  | 4.78 | 13588.1  | 4.66  | HUMAN | FRV967 | Keratin, type II cytoskeletal 8 (Fragment)              |
| 10141 | dirMS_041712_NAR_50mM_plus.17273.17273.3   | 3 | 10.08 | 1.124E-05       | (KILVYEA(K)K L V Y E V A I E L V A I D N R I)         | 159.85 | 489.9441 | 1467.821 | -0.0028  | -1.9  | 6.14 | 32535.6  | 9.19  | HUMAN | B4DZ6E | Regulator of microtubule dynamics protein 1             |
| 10142 | dirMS_041712_NAR_50mM_plus.2220.22320.3    | 3 | 10.08 | 0.524E-05       | (RIGGTPG(R)G P H P P A I Q S L I N I L L I A D N R I) | 119.81 | 629.3448 | 1880.024 | -0.0044  | -2.3  | 6.74 | 65763.5  | 9.81  | HUMAN | Q9HC05 | Neural receptor coactivator 5                           |
| 10143 | dirMS_041712_NAR_50mM_plus.2200.5200.3     | 3 | 10.08 | 0.137E-06       | (KATIPQD(K)K A T T P P Q Q A Q V E Y H K I)           | 86.38  | 489.5774 | 1466.723 | -0.0057  | -3.9  | 5.37 | 31075.7  | 5.85  | HUMAN | P00174 | Tissuephosphatase                                       |
| 10144 | dirMS_041712_NAR_60mM_plus.11660.11660.3   | 3 | 10.08 | 0.334E-05       | (RISVMSA(R)S V L P S F A I F A C Q K I)               | 118.18 | 520.6067 | 1048.107 | -0.0029  | -0.7  | 6.47 | 18308.2  | 6.07  | HUMAN | C21612 | Paternally-expressed gene 3 protein                     |
| 10145 | dirMS_041712_NAR_60mM_plus.17995.17995.3   | 3 | 10.08 | 1.104E-06       | (RIARFEEL(R)R A R F E L I A I D L F R I)              | 150.85 | 494.2554 | 1480.754 | -0.0027  | -1.8  | 4.68 | 45508.6  | 5.5   | HUMAN | AKB7Q2 | Heat shock cognate 71 kDa protein                       |
| 10146 | dirMS_041712_NAR_60mM_plus.20507.20507.3   | 3 | 10.08 | 1.416E-05       | (KJNAAGA(K)K A N A V A D L K L K L E K I)             | 166.93 | 452.6004 | 1355.789 | -0.0026  | -2    | 6.07 | 13786.8  | 9.33  | HUMAN | B7Z451 | Transcription elongation factor A protein 1             |
| 10147 | dirMS_041712_NAR_60mM_plus.20587.20587.3   | 3 | 10.08 | 1.700E-05       | (KIKYFEN(K)K V N P F I N F L R I)                     | 167.98 | 490.6056 | 1439.805 | -0.0023  | -1.6  | 8.59 | 33222.3  | 5.74  | HUMAN | ABN9R3 | Serine/threonine protein phosphatase                    |
| 10148 | dirMS_041712_NAR_120mM_minus.10844.10844.2 | 2 | 10.07 | 1.131E-04       | (KIKKAPF(K)K I U A P F R I)                           | 113.33 | 518.8309 | 1026.651 | -0.002   | -1.9  | 8.75 | 32161.5  | 5.18  | HUMAN | ABN616 | Actin, alpha skeletal muscle                            |
| 10149 | dirMS_041712_NAR_20mM_minus.8255.8255.2    | 2 | 10.07 | 0.574E-03       | (KJSDQAO(K)Q V A N I S F A V R I)                     | 131.7  | 618.3008 | 1235.602 | -0.0108  | -0.8  | 4.37 | 85057.6  | 4.94  | HUMAN | Q70000 | Heat shock protein HSP 90-alpha                         |
| 10150 | dirMS_041712_NAR_30mM_minus.17463.17568.2  | 2 | 10.07 | 0.437E-05       | (RIQEALAA(R)E I L A I N A E F F A R I)                | 150.25 | 574.3084 | 1147.611 | -0.0011  | -0.9  | 4.53 | 44227.3  | 7.81  | HUMAN | E7EQ6E | T-complex protein 1 subunit alpha                       |
| 10151 | dirMS_041712_NAR_30mM_minus.7828.7828.2    | 2 | 10.07 | 0.424E-05       | (KJYSEAA(K)R)I S F S E A I K I)                       | 97.78  | 455.7458 | 910.488  | -0.0037  | -4.1  | 6    | 150202.8 | 9.14  | HUMAN | E7EW20 | Unconventional myosin-VI                                |
| 10152 | dirMS_041712_NAR_50mM_minus.10972.10972.3  | 3 | 10.07 | 1.401E-05       | (RIVVYFN(R)N V V Y N E A T F R G K Y V P R I)         | 131.28 | 615.3184 | 1484.934 | -0.0059  | -3.8  | 8.43 | 50286.6  | 4.79  | HUMAN | P68371 | Tubulin beta-4B chain                                   |
| 10153 | dirMS_041712_NAR_50mM_minus.13463.13463.3  | 3 | 10.07 | 1.191E-05       | (KITTELEK(I)K I T I L V E F P S D T E V N V K A K I)  | 144.63 | 663.0226 | 1987.059 | -0.0061  | -3.1  | 4.41 | 17271.6  | 6.75  | HUMAN | B4DV12 | Ubiquitin                                               |
| 10154 | dirMS_041712_NAR_50mM_minus.9203.9203.3    | 3 | 10.07 | 1.400E-04       | (RIQEELLS(R)E I L L A N S E D K S I R V I)            | 120.57 | 544.6228 | 1631.86  | -0.006   | -3.7  | 4.68 | 139883.7 | 8.06  | HUMAN | P53621 | Coatomer subunit alpha                                  |
| 10155 | dirMS_041712_NAR_60mM_minus.10102.10102.3  | 3 | 10.07 | 0.199E-04       | (RINLMPRA(R)N R P A P M F I S P S E G R I)            | 115.98 | 487.9154 | 1461.727 | -0.0049  | -3.4  | 9.6  | 107710.1 | 5.38  | HUMAN | B77116 | Actinin alpha 1 isoform 3                               |
| 10156 | dirMS_041712_NAR_60mM_minus.15808.15931.3  | 3 | 10.07 | 0.531E-05 M250m | (KJGSDAL(K)S I D S I A Q H V L N R I)                 | 148.23 | 473.9047 | 1403.71  | -0.1966  | -3.8  | 6.74 | 56186.7  | 5.47  | HUMAN | B4DUR3 | T-complex protein 1 subunit gamma                       |
| 10157 | dirMS_041712_NAR_60mM_minus.9546.9546.3    | 3 | 10.07 | 0.421E-04 M61m  | (KIKWJAA(K)K Q I V A N P F T V F D I A K R I)         | 115.03 | 607.9739 | 1805.896 | -0.16109 | -8.7  | 8.75 | 20069.4  | 6.74  | HUMAN | EP9E54 | Heat shock cognate 71 kDa protein (Fragment)            |
| 10158 | dirMS_041712_NAR_120mM_plus.19094.19251.4  | 4 | 10.07 | 1.105E-06       | (KJQFQPM(K)K Q I V P N A E K Y L E L V L K I)         | 153.18 | 485.7703 | 1940.064 | -0.0046  | -2.4  | 6.75 | 52088.9  | 5.35  | HUMAN | Q02790 | Peptidyl-prolyl cis-trans isomerase FKBP4               |
| 10159 | dirMS_041712_NAR_120mM_plus.6110.6110.2    | 2 | 10.07 | 0.226E-06       | (KRIEPEYD(K)R E E V P D R I)                          | 84.95  | 539.2694 | 1077.532 | -0.0008  | -0.8  | 4.68 | 42230.8  | 4.77  | HUMAN | AKN628 | Putative tubulin beta chain-like protein ENSP0000290377 |
| 10160 | dirMS_041712_NAR_20mM_plus.7885.7885.3     | 3 | 10.07 | 0.138E-05       | (KJIEIAND(K)E V I V A N Q Q E N R I)                  | 124.5  | 410.2139 | 1228.628 | -0.0059  | -4.7  | 4.37 | 58502.6  | 6.09  | HUMAN | B4DQY3 | Very long 70 kDa protein 1-like                         |
| 10161 | dirMS_041712_NAR_20mM_plus.18446.18446.2   | 2 | 10.07 | 0.209E-05       | (KJGKJG(K)G V I G S I G S L G S L G I P E L S R I)    | 124.52 | 410.2139 | 1228.628 | -0.0059  | -4.7  | 4.37 | 58502.6  | 6.09  | HUMAN | B4DQY3 | Very long 70 kDa protein 1-like                         |
| 10162 | dirMS_041712_NAR_40mM_plus.17655.17655.3   | 3 | 10.07 | 0.379E-04       | (KJAGLEGS(R)G L G S I G S L G S L G I P E L S R I)    | 170.98 | 617.341  | 1850.013 | -0.0017  | -0.9  | 6.79 | 73212.9  | 9.19  | HUMAN | F5H2A9 | Heat shock cognate 71 kDa protein                       |
| 10163 | dirMS_041712_NAR_40mM_plus.18048.18048.3   | 3 | 10.07 | 1.63E-04        | (RIEQIAPC(R)E Q I P A Q G T L L A V D E P K R V I)    | 172.2  | 660.3654 | 1979.801 | -0.0009  | -0.4  | 4.41 | 19773.1  | 4.48  | HUMAN | B4DQY3 | L-fucose kinase                                         |
| 10164 | dirMS_041712_NAR_60mM_plus.18739.18739.3   | 3 | 10.07 | 1.396E-06       | (RJVSEFLA(R)S I F E L V F A D V P K I)                | 155.83 | 460.5914 | 1379.577 | -0.0027  | -2    | 6.04 | 13378.8  | 6.27  | HUMAN | CJ1557 | Peptidyl-prolyl cis-trans isomerase                     |
| 10165 | dirMS_041712_NAR_120mM_plus.1132.1132.2    | 2 | 10.06 | 0.125E-04       | (KJGSDAL(K)S I D S I A Q H V L N R I)                 | 148.23 | 473.9047 | 1403.71  | -0.1966  | -3.8  | 6.74 | 56186.7  | 5.47  | HUMAN | B4DUR3 | T-complex protein 1 subunit gamma                       |
| 10166 | dirMS_041712_NAR_20mM_minus.13208.13208.2  | 2 | 10.06 | 0.238E-04 M32m  | (KJALLEN(K)K A L E L I N L S L S I G K I)             | 183.02 | 574.3232 | 1131.644 | -0.1949  | -6    | 6.05 | 40821.3  | 7.79  | HUMAN | Q9Y617 | Phosphoserine aminotransferase                          |
| 10167 | dirMS_041712_NAR_20mM_minus.13737.13737.2  | 2 | 10.06 | 0.387E-05       | (KJGGSAV(K)G I G S A N V I S I E G K P K I)           | 188.65 | 670.8912 | 1340.778 | -0.0033  | -2.4  | 6    | 22956    | 8.8   | HUMAN | EPK225 | Cofilin-1                                               |
| 10168 | dirMS_041712_NAR_30mM_minus.26879.6879.2   | 2 | 10.06 | 0.207E-05       | (KJITGEGE(K)M T I E G I E I P V R I)                  | 91.93  | 504.238  | 1007.479 | -0.0105  | -10.4 | 4.53 | 96827.3  | 5.58  | HUMAN | EPK9U7 | Neutral alpha-glucosidase AB                            |
| 10169 | dirMS_041712_NAR_30mM_minus.6944.6944.2    | 2 | 10.06 | 0.229E-05       | (KJELGDA(K)E L G S N D A V I K R I)                   | 91.3   | 455.2195 | 909.431  | -0.0005  | -0.5  | 4.37 | 60404.6  | 6.4   | HUMAN | F3H017 | Stress-induced-phosphoglycerin 1                        |
| 10170 | dirMS_041712_NAR_30mM_minus.7203.7203.2    | 2 | 10.06 | 0.161E-05 M85m  | (KJQVDEA(K)D V I A N M K V I)                         | 92.92  | 520.7326 | 1084.462 | -0.1964  | -1.8  | 4.03 | 13588.1  | 4.66  | HUMAN | FRV971 | Keratin, type I cytoskeletal 8 (Fragment)               |
| 10171 | dirMS_041712_NAR_50mM_minus.10367.10367.3  | 3 | 10.06 | 0.166E-05       | (KJLQAEF(K)K I Q A E A P H V A V G T P G K R I)       | 127.08 | 515.6179 | 1544.854 | -0.1522  | -9.8  | 6.75 | 45117.9  | 5.45  | HUMAN | E7EQG2 | Eukaryotic initiation factor 4A-II                      |
| 10172 | dirMS_041712_NAR_50mM_minus.11309.11309.3  | 3 | 10.06 | 0.166E-04       | (RIVVVLVA(R)N V I V L M G S T S D L G M C K I)        | 132.08 | 577.9535 | 1731.84  | -0.0055  | -3.2  | 5.32 | 37681.5  | 5.93  | HUMAN | DR6F62 | Phosphoribosylaminimidazole carboxylase                 |
| 10173 | dirMS_041712_NAR_50mM_minus.14415.14416.3  | 3 | 10.06 | 1.104E-06       | (KJESFLFC(K)E A F L A V Q D G G T D T I T K E I)      | 150    | 615.6336 | 1844.891 | -0.005   | -2.7  | 4.23 | 21860.1  | 4.45  | HUMAN | E7EM83 | Calmodulin                                              |
| 10174 | dirMS_041712_NAR_50mM_minus.15212.15212.3  | 3 | 10.06 | 1.309E-06       | (RIVVYFN(R)N V V Y N E A T F R G K Y V P R I)         | 131.28 | 615.3184 | 1484.934 | -0.0059  | -3.8  | 8.43 | 50286.6  | 4.79  | HUMAN | P68371 | Tubulin beta-4B chain                                   |
| 10175 | dirMS_041712_NAR_50mM_minus.17755.17755.3  | 3 | 10.06 | 0.430E-04       | (RKHIFPLA(R)H F P L A A T V P P I S A E K I)          | 169.93 | 586.3248 | 1756.963 | -0.0034  | -1.9  | 6.75 | 49012.3  | 4.9   | HUMAN | ABN183 | Tubulin alpha-4A chain                                  |
| 10176 | dirMS_041712_NAR_50mM_minus.7047.7047.3    | 3 | 10.06 | 0.209E-05       | (KJYVSGY(K)M V I G G D E I E H Q D E G K I)           | 106.65 | 564.249  | 1690.73  | -0.0021  | -1.3  | 4.17 | 19395.5  | 5.38  | HUMAN | G3V359 | DNA-(apurinic or pyrimidinic site) lyase (Fragment)     |
| 10177 | dirMS_041712_NAR_60mM_minus.16706.16706.3  | 3 | 10.06 | 0.178E-05       | (KJLHMQS(R)I A L I H G S I A I G A I G V P K I)       | 135.05 | 596.9823 | 1518.937 | -0.0043  | -2.8  | 8.76 | 51260.6  | 5.39  | HUMAN | PE1978 | Heterogeneous nuclear ribonucleoprotein K               |
| 10178 | dirMS_041712_NAR_60mM_minus.19989.19989.3  | 3 | 10.06 | 1.739E-05       | (RISDQES(R)G V I G S I G S L G S L G I P E L S R I)   | 183.05 | 645.6287 | 1382.873 | -0.0027  | -1    | 8.75 | 20326.9  | 4.48  | HUMAN | Q75369 | Filamin-B1                                              |
| 10179 | dirMS_041712_NAR_60mM_minus.9398.9398.3    | 3 | 10.06 | 0.114E-06       | (RISQVENE(R)S V E N D V H G L M R I)                  | 112.07 | 423.218  | 1267.639 | -0.0005  | -0.4  | 6.32 | 43737.3  | 5.26  | HUMAN | FRV299 | Keratin, type I cytoskeletal 18                         |
| 10180 | dirMS_041712_NAR_120mM_plus.10623.10645.3  | 3 | 10.06 | 1.109E-07       | (RJKVYETE(R)R K Y E T E L A M A R Q I)                | 107.95 | 413.8849 | 1239.64  | 0        | 0     | 5.11 | 43773.3  | 5.26  | HUMAN | FRV299 | Keratin, type I cytoskeletal 18                         |
| 10181 | dirMS_041712_NAR_20mM_plus.17902.17993.2   | 2 | 10.06 | 0.204E-05       | (RISVVAPE(R)S L V P A A E L L E S R I)                | 194.93 | 642.8613 | 1284.716 | -0.0005  | -0.4  | 5.3  | 53738.5  | 5.74  | HUMAN | Q15149 | Plectin                                                 |
| 10182 | dirMS_041712_NAR_20mM_plus.18347.18347.2   | 2 | 10.06 | 0.162E-04       | (RJVHFLTE(R)G V I L V T C P S N L C T G L R I)        | 197.53 | 867.9606 | 1734.921 | -0.0008  | -3.9  | 8.75 | 47419.9  | 9.08  | HUMAN | P12532 | Creatine kinase U-type, mitochondrial                   |
| 10183 | dirMS_041712_NAR_20mM_plus.10193.10193.2   | 2 | 10.06 | 0.182E-06       | (RINLMPRA(R)N R P A P M F I S P S E G R I)            | 115.98 | 487.9154 | 1461.727 | -0.0049  | -3.4  | 9.6  | 107710.1 | 5.38  | HUMAN | B77116 | Actinin alpha 1 isoform 3                               |
| 10184 | dirMS_041712_NAR_40mM_plus.15510.15510.3   | 3 | 10.06 | 1.              |                                                       |        |          |          |          |       |      |          |       |       |        |                                                         |

|       |                                            |   |      |                 |                                                          |        |          |          |         |       |          |         |       |        |                                                          |                                                                                  |
|-------|--------------------------------------------|---|------|-----------------|----------------------------------------------------------|--------|----------|----------|---------|-------|----------|---------|-------|--------|----------------------------------------------------------|----------------------------------------------------------------------------------|
| 10242 | dirMS_041712_NAR_30mM_plus2.22726.22731.3  | 3 | 1003 | 0.463E+05       | (R)EISDFR (R)E L S D F I S/V/L/Q R)E                     | 17723  | 457.5693 | 1370.695 | -0.017  | -1.2  | 4.37     | 55361.8 | 6.42  | HUMAN  | G5EAS2                                                   | Protein disulfide isomerase family A, member 3, isoform CRA_b                    |
| 10243 | dirMS_041712_NAR_30mM_plus2.7926.7926.2    | 2 | 1003 | 0.220E+05       | (K)IAVAG (K)I A/V I A/G I/Q/V C Y V K)I                  | 9605   | 569.2905 | 1137.572 | 0.014   | -1.4  | 8.59     | 31075.7 | 5.65  | HUMAN  | P60174                                                   | Triosephosphate isomerase                                                        |
| 10244 | dirMS_041712_NAR_30mM_plus2.5936.5962.2    | 3 | 1003 | 1.168E+05       | (R)ISQKQ (R)E G A/V L Q E L Q)E                          | 92.1   | 485.2345 | 967.437  | -0.017  | -4.1  | 712.9    | 967.437 | 1.16  | HUMAN  | Q96133                                                   | Threonine-DNA ligase, cytoplasmic                                                |
| 10245 | dirMS_041712_NAR_30mM_plus2.12566.12566.3  | 3 | 1003 | 1.350E+05       | (R)IVAPGK (R)I V A/P K G A I/Q V A D S T/S G I A I R K)I | 19359  | 633.3555 | 1898.059 | -0.004  | -3.9  | 6.07     | 30711.4 | 7.15  | HUMAN  | H8P858                                                   | Fructose-bisphosphate aldolase A (Fragment)                                      |
| 10246 | dirMS_041712_NAR_30mM_plus2.13039.13039.3  | 3 | 1004 | 1.136E+06       | (R)IVDADL (R)I V/D L A/V L/N G A/D O G K P G I G K T)I   | 13737  | 570.9829 | 1710.399 | -0.043  | -2.5  | 5.93     | 15338.4 | 5.51  | HUMAN  | U7E1P1                                                   | ATP synthase subunit alpha, mitochondrial (Fragment)                             |
| 10247 | dirMS_041712_NAR_30mM_plus2.14974.14975.3  | 3 | 1003 | 1.765E+05       | (K)VTPLGU (K)I V/T L/P L G L E/G S O L L U R)I           | 14635  | 514.2992 | 1540.895 | -0.114  | -7.4  | 6.04     | 220081  | 6.98  | HUMAN  | AGNHR9                                                   | Structural maintenance of chromosomes flexible hinge domain-containing protein 1 |
| 10248 | dirMS_041712_NAR_30mM_plus2.10183.10183.2  | 2 | 1003 | 0.203E+06       | (K)GVGK (K)I V/E V/T S G K/P A R)I                       | 111.3  | 616.3425 | 1233.679 | -0.016  | -1.3  | 8.75     | 23225.7 | 9.89  | HUMAN  | CR2E1                                                    | Non-POU domain-containing octamer-binding protein (Fragment)                     |
| 10249 | dirMS_041712_NAR_30mM_plus2.14838.14838.3  | 3 | 1003 | 1.366E+05       | (R)AIFGSDA (R)I F/G S A/S M A I K N/P K)A                | 14438  | 528.5983 | 1583.789 | -0.083  | -5.2  | 8.59     | 73146.9 | 5.45  | HUMAN  | ER9121                                                   | Hypoxia up-regulated protein 1 (Fragment)                                        |
| 10250 | dirMS_041712_NAR_30mM_plus2.16515.16523.3  | 3 | 1003 | 0.540E+05       | (R)IVHGVQ (R)I H G A/G V)I(M)S V)I                       | 14423  | 418.2478 | 1252.719 | 0.0094  | 7.5   | 9.73     | 18819.6 | 10.31 | HUMAN  | FBW7C6                                                   | 60S ribosomal protein L10                                                        |
| 10251 | dirMS_041712_NAR_30mM_plus2.16982.16983.3  | 3 | 1003 | 1.661E+06       | (K)IVLPEP (K)I K V/P P V E/D V/T A/Q)I                   | 14577  | 438.5872 | 1313.746 | 0.007   | 0.5   | 6.07     | 16602.2 | 10.31 | HUMAN  | P39019                                                   | 40S ribosomal protein S19                                                        |
| 10252 | dirMS_041712_NAR_30mM_plus2.18865.18865.3  | 3 | 1003 | 1.398E+06       | (K)IVSFLP (K)I S/V L F A K D V/P V)I                     | 155.83 | 466.5914 | 1379.577 | 0.0027  | -2    | 6.04     | 13378.8 | 10.31 | HUMAN  | CN557                                                    | Peptidyl-prolyl-cis-trans isomerase                                              |
| 10253 | dirMS_041712_NAR_30mM_plus2.20910.20913.3  | 3 | 1003 | 1.136E+05       | (R)ITVNTPT (R)I T V N/T A/V E A V L V S V G K D R)S      | 370    | 518.0222 | 1490.967 | -0.049  | -2.6  | 5.74     | 17360.5 | 13.05 | HUMAN  | Q96133                                                   | Profilin-1 (Fragment)                                                            |
| 10254 | dirMS_041712_NAR_30mM_plus2.5742.5742.3    | 3 | 1003 | 1.861E+04 M17m  | (R)IARDEN (R)I A R Q/E)N G)M/P E/P A/T T A R)G           | 88.33  | 591.9441 | 1757.824 | 15.9942 | -0.4  | 4.79     | 64356.2 | 9.96  | HUMAN  | Q96013                                                   | Serine/threonine-protein kinase Pak 4                                            |
| 10255 | dirMS_041712_NAR_120mM_minus.18843.18843.4 | 4 | 1002 | 1.179E+05       | (K)IHLNDU (K)I L H D N L/U/S/D/E L N T V K Y)I           | 158.4  | 461.7605 | 1852.017 | 0.0027  | -1.5  | 5.78     | 88024.6 | 5.09  | HUMAN  | CJ8U11                                                   | Cytosolin-A (Fragment)                                                           |
| 10256 | dirMS_041712_NAR_20mM_minus.8506.8506.6    | 2 | 1002 | 0.757E+04       | (R)IIVGDSV (R)I I V G S/V/T G A T C)K)E                  | 134.28 | 663.8403 | 1326.672 | 0.011   | 0.8   | 8.59     | 31075.7 | 5.65  | HUMAN  | P60174                                                   | Triosephosphate isomerase                                                        |
| 10257 | dirMS_041712_NAR_30mM_minus.19481.19481.2  | 2 | 1002 | 0.318E+05       | (R)ISSLV (R)I S L V/L/W)A M E)K)I                        | 162.37 | 632.1564 | 1263.644 | -0.007  | -0.5  | 6.05     | 26161.1 | 5.68  | HUMAN  | EP910                                                    | Epitakin                                                                         |
| 10258 | dirMS_041712_NAR_30mM_plus2.6797.6877.2    | 2 | 1002 | 0.256E+05       | (R)IUGEDV (R)I G V/D E/D A/V)I                           | 149.67 | 430.7116 | 860.411  | 0.051   | 5.9   | 4.03     | 23999.1 | 9.48  | HUMAN  | P23284                                                   | Peptidyl-prolyl-cis-trans isomerase B                                            |
| 10259 | dirMS_041712_NAR_30mM_minus.9500.9688.2    | 2 | 1002 | 0.286E+06       | (K)IVGVNG (R)I G V/D E/D A/V)I                           | 106.32 | 403.2183 | 805.432  | -0.0022 | -2.7  | 9.72     | 36223.7 | 8.79  | HUMAN  | P04046                                                   | Glyceroldehyde-3-phosphate dehydrogenase                                         |
| 10260 | dirMS_041712_NAR_40mM_plus2.15658.15658.3  | 3 | 1002 | 1.498E+05       | (K)IAIIEEV (K)I A I/E E/V P P E L L E/T A E K)E          | 118.16 | 515.9988 | 1484.984 | -0.026  | -1.4  | 4.32     | 65036   | 6.27  | HUMAN  | EP9B13                                                   | Phosphoribosylaminimidazolecarboxamide formyltransferase                         |
| 10261 | dirMS_041712_NAR_60mM_minus.15374.15374.3  | 3 | 1002 | 0.213E+05       | (K)EGVWEY (K)I G V V E/V)S I/L A Q L)R)E                 | 145.9  | 498.5349 | 1494.791 | -0.009  | -4.6  | 4.75     | 48586.6 | 9.32  | HUMAN  | Q662R2                                                   | Amylin-3                                                                         |
| 10262 | dirMS_041712_NAR_60mM_minus.18561.18561.3  | 3 | 1002 | 1.172E+05       | (K)IVVLDK (R)I V L/Q D V)A)I                             | 165.12 | 510.6099 | 1529.8   | 0.0153  | 1.0   | 4.43     | 5189.9  | 4.56  | HUMAN  | B8Z254                                                   | 10 kDa heat shock protein, mitochondrial                                         |
| 10263 | dirMS_041712_NAR_120mM_plus.18403.18546.4  | 4 | 1002 | 1.164E+06       | (K)QIOPPP (K)I Q V/P P N/A E L K Y E L H L)S             | 101.1  | 485.7703 | 1940.064 | -0.0046 | -2.4  | 6.75     | 52088.9 | 5.35  | HUMAN  | Q02790                                                   | Peptidyl-prolyl-cis-trans isomerase FKBP4                                        |
| 10264 | dirMS_041712_NAR_20mM_plus.12209.12546.2   | 2 | 1002 | 0.454E+05       | (K)VLVLEG (K)I V L/G V)I(G)I)P)K)I                       | 158.47 | 449.2728 | 897.54   | 0.012   | -2.3  | 5.81     | 66448.1 | 9.42  | HUMAN  | Q00567                                                   | Nucleolar protein 56                                                             |
| 10265 | dirMS_041712_NAR_30mM_plus.9364.9364.2     | 2 | 1002 | 0.810E+04       | (R)IALLGS (R)I A L/S E/V A L E/E K)I                     | 136.32 | 691.3246 | 1381.848 | -0.002  | -4.5  | 4.09     | 59654.3 | 5.14  | HUMAN  | P13485                                                   | Keratin, type I cytoskeletal 18                                                  |
| 10266 | dirMS_041712_NAR_30mM_plus2.13526.13526.2  | 2 | 1002 | 1.100E+06       | (R)IKSSAL (R)I K S L/D)V)A)I                             | 121.78 | 458.7641 | 916.511  | 0.0111  | -12.1 | 4.37     | 36336.9 | 7.84  | HUMAN  | AMBV29                                                   | Fructose-bisphosphate aldolase                                                   |
| 10267 | dirMS_041712_NAR_30mM_plus2.18037.18037.2  | 2 | 1002 | 0.359E+05       | (R)IINGQL (R)I N G I G)I)A I)A D/L)R)I                   | 147.25 | 585.3347 | 1169.664 | -0.016  | -1.3  | 5.84     | 34524.7 | 5.4   | HUMAN  | AMBV37                                                   | Protein SEC13 homolog                                                            |
| 10268 | dirMS_041712_NAR_30mM_plus2.21683.21683.2  | 2 | 1002 | 0.129E+05       | (R)ITJLAGP (R)I T/L A/G P T N A I F K)A                  | 168.37 | 679.9016 | 1358.804 | -0.0083 | -6.1  | 8.75     | 32621   | 8.75  | HUMAN  | B4DLC0                                                   | Poly(C)-binding protein 2                                                        |
| 10269 | dirMS_041712_NAR_30mM_plus2.17332.17332.3  | 3 | 1002 | 0.344E+05       | (K)IDPVM (K)I D P V V/H)S/L)T)R)I                        | 159.57 | 430.9226 | 1290.753 | 0.004   | 0.3   | 6.74     | 57147.5 | 7.81  | HUMAN  | P30419                                                   | Glycylpeptide N-tetradecanoyltransferase 1                                       |
| 10270 | dirMS_041712_NAR_30mM_plus2.14184.14184.3  | 3 | 1002 | 0.115E+05       | (R)IILSAL (R)I I L S A/L)A)I                             | 110.13 | 509.2667 | 1521.795 | 0.004   | -1.1  | 9.75     | 25217.9 | 6.4   | HUMAN  | EP1813                                                   | Alpha-enolase                                                                    |
| 10271 | dirMS_041712_NAR_30mM_minus.16954.16954.3  | 3 | 1001 | 0.424E+05       | (K)HLEINP (K)I H L E I N P/H)S I)E T U R)I               | 146.92 | 596.3176 | 1786.945 | -0.0064 | -3.6  | 5.27     | 85057.6 | 4.94  | HUMAN  | PT9000                                                   | Heat shock protein HSP 90-alpha                                                  |
| 10272 | dirMS_041712_NAR_30mM_minus.12618.12618.2  | 2 | 1001 | 0.270E+05       | (R)ITLSGME (R)I T L S)G)M/R)S V C)R)I                    | 122.03 | 651.795  | 1302.582 | 0.014   | 0.8   | 8.56     | 42755.7 | 7.81  | HUMAN  | B72F24                                                   | T-complex protein 1 subunit delta                                                |
| 10273 | dirMS_041712_NAR_30mM_plus2.16434.16434.2  | 2 | 1001 | 0.213E+05       | (K)INAGA (K)I N A/G A)A)D L)S M R)I                      | 143.42 | 493.2881 | 985.568  | 0.003   | 1.3   | 5.84     | 13786.8 | 9.33  | HUMAN  | B72A51                                                   | Transcription elongation factor A protein 1                                      |
| 10274 | dirMS_041712_NAR_30mM_plus2.10556.10556.2  | 2 | 1001 | 1.160E+05       | (R)IVSVA (R)I V S V A)E)K)E)I                            | 162    | 548.880  | 1653.927 | -0.0023 | -1.3  | 233493.8 | 9.33    | HUMAN | EP9B13 | Phosphoribosylaminimidazolecarboxamide formyltransferase |                                                                                  |
| 10275 | dirMS_041712_NAR_120mM_plus.10787.10786.3  | 3 | 1001 | 0.201E+05       | (K)RSDTDL (K)I V S R D T L)Y)E A)I                       | 102.45 | 436.8969 | 1308.691 | -0.045  | -11.1 | 6.04     | 25502   | 10.06 | HUMAN  | PE2806                                                   | 45S ribosomal protein L10a                                                       |
| 10276 | dirMS_041712_NAR_120mM_plus.19998.19998.4  | 4 | 1001 | 1.621E+05       | (K)IAADWF (K)I A A/D)W)F D K E F H G N I I)K)I           | 158.17 | 491.0027 | 1960.992 | -0.0026 | -1.3  | 5.38     | 49181   | 4.93  | HUMAN  | K7E7P6                                                   | TATA-binding protein-associated factor 2N                                        |
| 10277 | dirMS_041712_NAR_120mM_plus.21001.21001.3  | 3 | 1001 | 2.391E+06       | (R)ITLAEI (R)I T L A E I A N K/V L D N)M P L R G)K)I     | 162.92 | 666.7047 | 1998.105 | -0.0057 | -2.8  | 5.85     | 23729.5 | 9.89  | HUMAN  | CN9207                                                   | Non-POU domain-containing octamer-binding protein (Fragment)                     |
| 10278 | dirMS_041712_NAR_30mM_plus2.16205.16205.2  | 2 | 1001 | 0.235E+04 M148m | (R)IDTJDA (R)I D T J D A)P)H)K)I                         | 137.32 | 507.7505 | 996.488  | 16.0074 | 12.3  | 4.21     | 37482.1 | 5.36  | HUMAN  | EP9C26                                                   | Actin, gamma-enteric smooth muscle                                               |
| 10279 | dirMS_041712_NAR_30mM_plus2.16661.16661.3  | 3 | 1001 | 0.444E+05       | (K)IOLSK (K)I O L S K)P I)P Q)K)I                        | 140.57 | 656.306  | 1311.604 | 0.009   | 0.7   | 5.83     | 63888.6 | 6.49  | HUMAN  | EP1408                                                   | Proscapsin                                                                       |
| 10280 | dirMS_041712_NAR_30mM_plus2.19052.19052.2  | 2 | 1001 | 0.448E+05       | (R)ILDFLES (R)I L D F L E)S G)K)I                        | 152.1  | 511.2819 | 1021.556 | 0.0001  | 0.1   | 4.37     | 73202   | 9.19  | HUMAN  | CJ9M55                                                   | Probable ATP-dependent RNA helicase DXD17                                        |
| 10281 | dirMS_041712_NAR_30mM_plus2.7089.7089.2    | 2 | 1001 | 1.137E+05       | (R)ITTTGSJ (R)I T T I)G)S Y I A)N)R)I                    | 91.87  | 542.274  | 1083.543 | -0.0022 | -2    | 8.41     | 10799.8 | 5.07  | HUMAN  | IL3X7                                                    | Proteasome subunit beta type-6 (Fragment)                                        |
| 10282 | dirMS_041712_NAR_40mM_plus2.11758.1758.3   | 3 | 1001 | 0.288E+05       | (K)IYVLQAC (K)I Y L D)A D Q L H A)V A G S A)R)A          | 171.33 | 430.9967 | 1812.96  | 0.0153  | 8.4   | 5.21     | 24773.5 | 8.98  | HUMAN  | HOY449                                                   | Electron transfer flavoprotein subunit alpha, mitochondrial                      |
| 10283 | dirMS_041712_NAR_40mM_plus2.7505.7505.2    | 2 | 1001 | 0.359E+05       | (K)IOLSK (K)I O L S K)P I)P Q)K)I                        | 140.57 | 656.306  | 1311.604 | 0.009   | 0.7   | 5.83     | 63888.6 | 6.49  | HUMAN  | EP1408                                                   | Proscapsin                                                                       |
| 10284 | dirMS_041712_NAR_30mM_plus2.10126.10126.3  | 3 | 1001 | 0.594E+05       | (K)IKNDP (K)I T K N D)P S A)P K)I                        | 120.53 | 484.6709 | 1451.81  | 0.003   | -4.9  | 6.07     | 20023.8 | 7.99  | HUMAN  | B4D616                                                   | Asparagine--tRNA ligase, cytoplasmic                                             |
| 10285 | dirMS_041712_NAR_60mM_plus.17206.17206.3   | 3 | 1001 | 0.175E+04       | (R)IYSHSL (R)I Y I)S H)S L/P)N L R)S                     | 147.6  | 433.2569 | 1297.763 | -0.0065 | -5    | 6.75     | 60871.9 | 6.33  | HUMAN  | B4D193                                                   | Phosphoribosylformylglycinamide cyclo-ligase                                     |
| 10286 | dirMS_041712_NAR_30mM_plus.17356.17356.3   | 3 | 1001 | 1.176E+05       | (R)IRTVSUI (R)I R T V)S L I)P)D)S M R)I                  | 148.8  | 554.954  | 1662.848 | -0.0005 | -0.3  | 4.56     | 43773.3 | 5.26  | HUMAN  | FBV299                                                   | Keratin, type I cytoskeletal 18                                                  |
| 10287 | dirMS_041712_NAR_30mM_plus.20399.20399.3   | 3 | 1001 | 1.421E+05       | (K)INAGA (K)I N A/G A)A)D L)S M R)I                      | 166.93 | 452.6084 | 1355.789 | -0.026  | -2    | 6.07     | 13786.8 | 9.33  | HUMAN  | B72A51                                                   | Transcription elongation factor A protein 1                                      |
| 10288 | dirMS_041712_NAR_120mM_minus.5146.5146.3   | 3 | 1001 | 1.600E+05       | (R)ILJQSL (R)I L K S A I)E I)Q)A)K)E)R)I                 | 80.68  | 455.5713 | 1358.702 | -0.029  | -2.1  | 6.14     | 53377.8 | 5.74  | HUMAN  | P15149                                                   | Plectin                                                                          |
| 10289 | dirMS_041712_NAR_120mM_minus.7407.7407.3   | 3 | 100  | 0.120E+05       | (R)INDEHA (R)I N D E)A N E)A)R)E)R)I                     | 94.67  | 480.884  | 1440.635 | 0.0025  | 1.7   | 4.17     | 22768.7 | 8.94  | HUMAN  | PE1026                                                   | Ras-related protein Rab-10                                                       |
| 10290 | dirMS_041712_NAR_30mM_minus.27411.7427.2   | 2 | 100  | 0.137E+05       | (R)IVESDAO (R)I V E S)A)D)E L Q)I)K)I                    | 94.82  | 573.7846 | 1146.564 | -0.0018 | -1.6  | 4.14     | 17163.6 | 6.74  | HUMAN  | CN128                                                    | ADP-ribosylation factor 5 (Fragment)                                             |
| 10291 | dirMS_041712_NAR_30mM_plus2.952.9544.2     | 2 | 100  | 0.889E+05       | (R)IGGGDQ (R)I G G G)I)A)P)A)R)I                         | 106.4  | 485.2762 | 965.548  | -0.025  | -2.6  | 9.75     | 15036.9 | 7.16  | HUMAN  | EP1126                                                   | 110 kDa US small nuclear ribonucleoprotein component (Fragment)                  |
| 10292 | dirMS_041712_NAR_30mM_minus.15541.15581.3  | 3 | 100  | 1.161E+05       | (R)ILVYV (R)I L V Y)A S D E)A)R)A)K)I                    | 148.1  | 495.3511 | 1814.043 | -0.019  |       |          |         |       |        |                                                          |                                                                                  |







|       |                                           |   |      |   |                |                                                                 |        |          |          |          |      |      |          |       |       |        |                                                                        |
|-------|-------------------------------------------|---|------|---|----------------|-----------------------------------------------------------------|--------|----------|----------|----------|------|------|----------|-------|-------|--------|------------------------------------------------------------------------|
| 10678 | dirMS_041712_NAR_40mM_minus.8159.8159.3   | 3 | 9.8  | 1 | 3.18E-05       | (R)DGKLS (R)D G V L V S /E S/D/VLP/K(E)                         | 128.2  | 491.9311 | 1473.78  | -0.0041  | -0.5 | 4.56 | 56607.4  | 5.57  | HUMAN | F8V8A4 | Keratin, type II cytoskeletal 8                                        |
| 10679 | dirMS_041712_NAR_50mM_minus.13325.13325.3 | 3 | 9.8  | 0 | 1.55E-05       | (R)IVATPK (R)I V A T K V P /V N/A/G A G R R                     | 144.08 | 514.9821 | 1542.937 | -0.0049  | -3.2 | 9.99 | 65918.2  | 9.74  | HUMAN | E7EQV3 | Polymenylate-binding protein 1                                         |
| 10680 | dirMS_041712_NAR_50mM_minus.1562.1562.3   | 3 | 9.8  | 1 | 4.43E-05       | (K)GQVQ (K)G A Q V G /V F E V R V G V S /G S /G K               | 155.62 | 516.2608 | 1684.767 | 0.0005   | 1.5  | 5.21 | 18511.8  | 5.62  | HUMAN | H33234 | Protein kinase B3                                                      |
| 10681 | dirMS_041712_NAR_50mM_minus.16452.16452.3 | 3 | 9.8  | 0 | 1.75E-05 M1m   | (J)hNPLVH (J)h K P L V G /V P /E /V L/G/G/G/G K                 | 161.27 | 526.3077 | 1569.919 | 15.59    | -3.1 | 10   | 22450.2  | 5.44  | HUMAN | P30085 | UMP-CMP kinase                                                         |
| 10682 | dirMS_041712_NAR_60mM_minus.12253.12253.3 | 3 | 9.8  | 1 | 4.75E-05       | (R)JNVYVH (R)J N V V Y E A /G /G V Y P /R(A)                    | 167.7  | 615.3145 | 1843.934 | -0.0048  | -2.6 | 8.43 | 50286.6  | 4.79  | HUMAN | PB6371 | Tubulin beta-4B chain                                                  |
| 10683 | dirMS_041712_NAR_60mM_minus.1766.1766.3   | 3 | 9.8  | 1 | 2.29E-05       | (R)IGLSTLR (R)I G L S T L R /G E /K N L S /R                    | 159.48 | 543.6476 | 1628.933 | -0.0047  | -2.9 | 8.75 | 22294.4  | 5.26  | HUMAN | Q43399 | Tumor protein D54                                                      |
| 10684 | dirMS_041712_NAR_60mM_minus.8339.833.3    | 3 | 9.8  | 0 | 7.55E-04       | (K)HTSPNS (K)H T S P N S /D/T A /V D /G P /R(R)                 | 152.02 | 562.2608 | 1684.767 | 0.0005   | 1.5  | 5.21 | 18511.8  | 5.62  | HUMAN | H33234 | Protein kinase B3                                                      |
| 10685 | dirMS_041712_NAR_60mM_minus.9780.9780.3   | 3 | 9.8  | 1 | 2.83E-05       | (R)ITNEME (R)I T N E M E /N F /V T /V R                         | 114.3  | 465.2487 | 1393.732 | -0.0006  | -0.4 | 5.81 | 66208.7  | 8.32  | HUMAN | PO4264 | Keratin, type II cytoskeletal 1                                        |
| 10686 | dirMS_041712_NAR_120mM_plus.11543.11543.3 | 3 | 9.8  | 2 | 3.74E-05       | (K)KGEKDR (K)K E K E /D P /Q L /G /E /Q /E                      | 113.53 | 576.3192 | 1726.933 | 0.0097   | 5.6  | 6.12 | 25082    | 11.29 | HUMAN | AZ4385 | 40S ribosomal protein S6                                               |
| 10687 | dirMS_041712_NAR_120mM_plus.13849.13849.4 | 4 | 9.8  | 1 | 9.40E-05       | (K)KAGKPPS (K)K A G K P P S /A L /L /H N E M V A /K(V)          | 126.23 | 644.9972 | 1856.969 | -0.0018  | -0.9 | 8.64 | 22002    | 10.06 | HUMAN | PC6906 | 60S ribosomal protein L10a                                             |
| 10688 | dirMS_041712_NAR_120mM_plus.14317.14317.3 | 3 | 9.8  | 1 | 2.66E-04 M313m | (R)RTYVDSI (R)R T Y V D S I /L /D /L /D /S /M(R)                | 127.45 | 560.2841 | 1664.848 | 15.9898  | -3   | 4.56 | 43773.3  | 5.26  | HUMAN | R8V729 | Keratin, type I cytoskeletal 18                                        |
| 10689 | dirMS_041712_NAR_120mM_plus.14431.14431.3 | 3 | 9.8  | 0 | 5.25E-04       | (K)GATVYSV (K)G A T V Y S V /L /V /L /V /L /V /L /V             | 107.01 | 535.2166 | 1604.927 | 0.0011   | 1    | 6.05 | 34698.2  | 9     | HUMAN | Q10622 | ADP-ribosylation factor CTPase activating protein 3 (Fragment)         |
| 10690 | dirMS_041712_NAR_20mM_plus.17830.17830.2  | 2 | 9.8  | 0 | 8.88E-04       | (K)VDVPGQ (K)V D V P G /Q D /Q L /T /A /T /G /R                 | 194.77 | 780.9029 | 1560.802 | -0.0011  | -2   | 4.21 | 31330.8  | 9.26  | HUMAN | EP9082 | Malate dehydrogenase, mitochondrial                                    |
| 10691 | dirMS_041712_NAR_20mM_plus.7887.7887.2    | 2 | 9.8  | 0 | 8.93E-04 M21m  | (K)JATAVHR (K)J A T A V H R /M P /D /Q /E /Q /E                 | 124.48 | 590.7861 | 1164.572 | 15.9932  | -1.5 | 5.88 | 22382    | 8.26  | HUMAN | Q6830  | Peroxiredoxin-1                                                        |
| 10692 | dirMS_041712_NAR_30mM_plus.21358.21358.2  | 2 | 9.8  | 0 | 3.21E-05       | (K)FDGLGK (K)F D G L G K /M A /P /Y /R                          | 127.37 | 620.3199 | 1239.619 | 0.0135   | 10.9 | 5.83 | 32905.8  | 5.88  | HUMAN | CJ9119 | Cathepsin D light chain (Fragment)                                     |
| 10693 | dirMS_041712_NAR_40mM_plus.17977.18000.3  | 3 | 9.8  | 0 | 1.24E-05       | (R)IGGATG (R)I G G A T G /T /T F P M S A /V A /R /R             | 172.02 | 661.7924 | 1981.959 | 0.0133   | 6.7  | 6.75 | 17170.1  | 8.86  | HUMAN | P98179 | Putative RNA-binding protein 3                                         |
| 10694 | dirMS_041712_NAR_50mM_plus.11467.11467.3  | 3 | 9.8  | 0 | 1.38E-05       | (R)JALJDE (R)J A L J D E /L N A E A S /G D A /V A /H /R         | 167.62 | 620.6353 | 1865.91  | -0.0187  | -10  | 4.54 | 13862.5  | 4.75  | HUMAN | FYF892 | Regulation of nuclear pre-mRNA domain-containing protein 1A (Fragment) |
| 10695 | dirMS_041712_NAR_50mM_plus.25943.5943.3   | 3 | 9.8  | 0 | 1.85E-04       | (R)VEAKPE (R)V E A K P E /V Q /S /P P P /V R                    | 95.3   | 488.9312 | 1464.781 | -0.0015  | -1   | 6.11 | 54172.2  | 5.41  | HUMAN | QUN986 | Ras GTPase-activating protein-binding protein 2                        |
| 10696 | dirMS_041712_NAR_60mM_plus.10127.10127.3  | 3 | 9.8  | 1 | 1.48E-06       | (K)FROGEE (K)F R O G E E /G A /V D /G P /R P /T                 | 111.47 | 551.593  | 1652.766 | -0.0019  | -1.1 | 4.32 | 55361.8  | 6.42  | HUMAN | G5E452 | Protein disulfide isomerase family A, member 3, isoform CRA_b          |
| 10697 | dirMS_041712_NAR_60mM_plus.12199.12303.3  | 3 | 9.8  | 1 | 3.54E-06       | (R)EAGDPR (R)E A G D P R /C /T /D /Q /R /T                      | 121.45 | 445.3046 | 1335.69  | 0.0089   | 6.7  | 4.56 | 14166.5  | 11.62 | HUMAN | B4D2E1 | Histone H3                                                             |
| 10698 | dirMS_041712_NAR_60mM_plus.13903.13903.3  | 3 | 9.8  | 1 | 1.40E-06       | (R)EMDRER (R)E M D R E /L T /L /V /L /V /L /V                   | 128.93 | 483.2457 | 1447.721 | 0.0016   | 1.1  | 4.32 | 55323    | 6.02  | HUMAN | B4D018 | T-complex protein 1 subunit zeta                                       |
| 10699 | dirMS_041712_NAR_60mM_plus.16328.16404.3  | 3 | 9.8  | 0 | 4.61E-05       | (R)JVFDRPR (R)J V F D R P /R /L P /V S /L R                     | 142.33 | 444.917  | 1332.742 | -0.0058  | -4.4 | 9.6  | 18685.5  | 9.45  | HUMAN | B4DEV8 | Proteasome subunit alpha type                                          |
| 10700 | dirMS_041712_NAR_60mM_plus.17157.17157.3  | 3 | 9.8  | 0 | 2.04E-05       | (K)HTHPGN (K)H T H P G N /L V /G /V E /F /E /A /K /A            | 147.35 | 610.9424 | 1539.817 | 0.0015   | 1    | 5.37 | 22314.2  | 9.39  | HUMAN | P30044 | Peroxiredoxin-5, mitochondrial                                         |
| 10701 | dirMS_041712_NAR_20mM_minus.14044.14044.2 | 2 | 9.79 | 0 | 9.30E-04       | (R)GTCIHT (R)G T C I H T /C /T /G /P A S /S /R                  | 152.63 | 680.5561 | 1595.705 | 0        | 0    | 9.75 | 30947.9  | 6.47  | HUMAN | H93234 | Pyruvate kinase                                                        |
| 10702 | dirMS_041712_NAR_20mM_minus.13335.13335.2 | 2 | 9.79 | 0 | 2.34E-05       | (R)GVQVDS (R)G V Q V D S /V /D /V /L /S /R /E                   | 183.02 | 757.2944 | 1511.786 | -0.0048  | -2.7 | 4.03 | 74944.3  | 7.79  | HUMAN | F59043 | Heat shock protein 75 kDa, mitochondrial                               |
| 10703 | dirMS_041712_NAR_30mM_minus.14783.14783.2 | 2 | 9.79 | 0 | 2.81E-05       | (R)DITDPSR (R)D I D S P R /Y /T A R /N                          | 134.71 | 599.3249 | 1197.647 | -0.0049  | -4.1 | 4.21 | 5755.5   | 5.75  | HUMAN | H3BN34 | Pyruvate kinase isozymes M1/M2 (Fragment)                              |
| 10704 | dirMS_041712_NAR_30mM_minus.16552.16886.2 | 2 | 9.79 | 0 | 5.71E-05 M83m  | (R)ITLIQVR (R)I T L I Q V R /M T /V V E /K                      | 144.43 | 584.7961 | 949.502  | 219.0826 | 7.1  | 5.75 | 271875.5 | 5.65  | HUMAN | AZ8R91 | Neuroblasta-amplified sequence                                         |
| 10705 | dirMS_041712_NAR_40mM_minus.6180.6184.2   | 2 | 9.79 | 0 | 9.42E-05       | (R)IISTGKN (R)I I S T G K N /T P /S /V /R /S                    | 101.98 | 498.2302 | 975.453  | 0.0001   | 0.1  | 8.46 | 43773.3  | 5.26  | HUMAN | R8V729 | Keratin, type I cytoskeletal 18                                        |
| 10706 | dirMS_041712_NAR_40mM_minus.1521.1521.3   | 3 | 9.79 | 0 | 1.24E-05       | (K)KSLGKQ (K)K S L G K Q /L V D /L F /L K /D                    | 124.31 | 511.987  | 1370.751 | 0.0001   | 0.1  | 4.56 | 22382    | 5.71  | HUMAN | Q14080 | Exoprotein 1                                                           |
| 10707 | dirMS_041712_NAR_60mM_minus.18196.18196.2 | 2 | 9.79 | 1 | 1.56E-06       | (K)SLKGGK (K)S L K G G K /V D /L F /L K /D                      | 163.42 | 411.5102 | 1232.761 | -0.0022  | -1.8 | 8.31 | 11827.3  | 7     | HUMAN | W727A9 | Phosphoglycerate kinase                                                |
| 10708 | dirMS_041712_NAR_60mM_minus.8714.8714.3   | 3 | 9.79 | 1 | 2.84E-05       | (R)JLGTGPR (R)J L G T G P R /E /L S /T A E /R                   | 108.45 | 434.572  | 1301.706 | -0.0045  | -3.5 | 6.14 | 54427.4  | 5.96  | HUMAN | Q00045 | Acetyl-CoA carboxylase 1                                               |
| 10709 | dirMS_041712_NAR_120mM_plus.21260.21260.4 | 4 | 9.79 | 0 | 1.48E-05       | (K)JALHAFK (K)J A L H A F K /L E /H /F /L E /H /I /M /D /K /E   | 164.35 | 481.7493 | 1923.975 | 0.0003   | 0.4  | 5.27 | 53536.6  | 6.01  | HUMAN | Q14204 | Cytoplasmic dynein 1 heavy chain 1                                     |
| 10710 | dirMS_041712_NAR_120mM_plus.23897.23897.3 | 3 | 9.79 | 0 | 6.24E-05 M145m | (R)GVVAVG (R)G V V A V G /L /V /L /V /L /V /L /V                | 170.73 | 524.9747 | 1550.255 | -0.0013  | -2.3 | 6.75 | 22194.6  | 6.27  | HUMAN | Q73946 | 60S ribosomal protein L12                                              |
| 10711 | dirMS_041712_NAR_20mM_plus.12812.12812.2  | 2 | 9.79 | 0 | 1.33E-05       | (K)DHPNPK (K)D H P N P K /I /I /I /N P Q E /R /T                | 160.57 | 597.8227 | 1194.648 | -0.0056  | -8   | 4.97 | 83605    | 4.97  | HUMAN | PO8238 | Heat shock protein HSP 90-beta                                         |
| 10712 | dirMS_041712_NAR_30mM_plus.24186.4186.2   | 2 | 9.79 | 0 | 1.22E-06 M299m | (K)NMMNAK (K)N M M N A K /M /M /A /C /D /P /R                   | 69.57  | 549.2125 | 1065.427 | 31.9903  | 0.4  | 5.84 | 50199.4  | 4.75  | HUMAN | ANN222 | Tubulin beta-8 chain-like protein LOC260334                            |
| 10713 | dirMS_041712_NAR_40mM_plus.12399.12399.3  | 3 | 9.79 | 1 | 1.76E-05       | (K)QJNADE (K)Q J N A D E /S /D P /K Y /I /N V /K /Q             | 139.05 | 611.3255 | 1831.98  | -0.0181  | -9.9 | 4.56 | 14693.3  | 5.69  | HUMAN | CJ9159 | 26S protease regulatory subunit 7 (Fragment)                           |
| 10714 | dirMS_041712_NAR_40mM_plus.14091.14091.3  | 3 | 9.79 | 0 | 1.15E-05       | (R)JLVLEVAR (R)J L V L E V A R /D /H /L G E S T V /R            | 149.2  | 550.9762 | 1650.917 | -0.0019  | -2   | 5.4  | 55007.5  | 4.25  | HUMAN | R8V8V9 | ATP synthase subunit beta                                              |
| 10715 | dirMS_041712_NAR_40mM_plus.8230.8230.2    | 2 | 9.79 | 0 | 1.89E-05       | (K)SFMNDE (K)S F M N D E /K /S /L /S /L /V /L /V                | 108.48 | 415.954  | 831.382  | 0.0017   | 2.1  | 8.46 | 35548.6  | 4.95  | HUMAN | B4D060 | Asparagine-PRNA ligase, cytoplasmic                                    |
| 10716 | dirMS_041712_NAR_50mM_plus.12867.12867.3  | 3 | 9.79 | 0 | 5.97E-05       | (R)JDFAEPR (R)J D F A E P R /D /V C S V /V /V /N /K /Q          | 135.82 | 616.6476 | 1847.932 | -0.0038  | -2   | 4.56 | 13246.4  | 9.21  | HUMAN | Q5V117 | Nuclear receptor coactivator 5 (Fragment)                              |
| 10717 | dirMS_041712_NAR_50mM_plus.2685.7685.3    | 3 | 9.79 | 1 | 5.19E-04       | (R)SICQLQV (R)S I C Q L Q V /P R E A E Q D A /K /Q              | 106.08 | 629.6395 | 1886.902 | 0.0014   | 0.8  | 4.68 | 23297.4  | 6.12  | HUMAN | W7K5F4 | Uncharacterized protein (Fragment)                                     |
| 10718 | dirMS_041712_NAR_60mM_plus.10502.10525.2  | 2 | 9.79 | 1 | 1.58E-06       | (R)KIVYETE (R)K I V Y E T E /L /L /M /R /K                      | 113.07 | 620.326  | 1239.644 | 0.0057   | 3.7  | 6.11 | 43773.3  | 5.26  | HUMAN | R8V729 | Keratin, type I cytoskeletal 18                                        |
| 10719 | dirMS_041712_NAR_60mM_plus.13973.13973.3  | 3 | 9.79 | 0 | 1.21E-05       | (R)JALGDFR (R)J A L G D F R /L /V /L /V /L /V /L /V             | 136.18 | 472.7669 | 944.531  | -0.0021  | -4.5 | 8.75 | 22382    | 6.12  | HUMAN | Q10622 | T-complex protein 1 subunit delta                                      |
| 10720 | dirMS_041712_NAR_60mM_plus.14873.14873.3  | 3 | 9.79 | 1 | 1.45E-05       | (R)KJAKCE (R)K J A K C E /D /H /L V S /A S /K /K                | 134.32 | 507.5883 | 1520.756 | -0.0056  | -3.7 | 6    | 61363    | 8.73  | HUMAN | CJ9059 | Propionyl-CoA carboxylase beta chain, mitochondrial                    |
| 10721 | dirMS_041712_NAR_120mM_minus.9689.9689.3  | 3 | 9.78 | 0 | 3.90E-05       | (K)KPNVPH (K)K P N V P H /G /T /P /G /R                         | 107.48 | 426.2293 | 1306.669 | 0.0049   | 3.7  | 9.75 | 28185.1  | 10.76 | HUMAN | B4D016 | Peptidase RNA helicase DDX39B                                          |
| 10722 | dirMS_041712_NAR_30mM_minus.13626.13626.2 | 2 | 9.78 | 0 | 5.94E-05       | (R)JLJLSEIR (R)J L J L S E I R /S /R /K                         | 128.2  | 422.2686 | 843.53   | 0.0001   | 0.1  | 6    | 17222    | 10.53 | HUMAN | PC6277 | 40S ribosomal protein S13                                              |
| 10723 | dirMS_041712_NAR_30mM_minus.15075.15075.2 | 2 | 9.78 | 0 | 1.24E-05       | (R)JALGDFR (R)J A L G D F R /L /V /L /V /L /V /L /V             | 136.18 | 472.7669 | 944.531  | -0.0021  | -4.5 | 8.75 | 22382    | 6.12  | HUMAN | ADN025 | Histone H2A                                                            |
| 10724 | dirMS_041712_NAR_40mM_minus.14196.14196.3 | 3 | 9.78 | 1 | 1.47E-05       | (K)JTSDFK (K)J T S D F K /I /V /D /E /P /L T K D /D /P /V /R /H | 168.18 | 653.683  | 1959.043 | -0.008   | -4.1 | 4.23 | 23313.1  | 4.9   | HUMAN | BJ14E4 | Ataxin 10 (Fragment)                                                   |
| 10725 | dirMS_041712_NAR_50mM_minus.17945.17970.3 | 3 | 9.78 | 1 | 9.88E-04       | (K)JLDVSA (K)J L D V S A /L V L V L V E /V N R /S /R            | 171.25 | 614.0139 | 1840.029 | -0.0015  | -0.8 | 4.28 | 295149.3 | 7.4   | HUMAN | Q26216 | Translational activator GGN1                                           |
| 10726 | dirMS_041712_NAR_60mM_minus.18213.18213.3 | 3 | 9.78 | 1 | 5.46E-05       | (K)KTLFPL (K)K T L F P L /E /A /K /K                            | 162.7  | 424.9345 | 1272.793 | -0.0036  | -2.9 | 8.59 |          |       |       |        |                                                                        |













|       |                                            |   |      |           |                                                    |        |          |          |         |      |       |          |         |       |        |                                                                                                |                                   |
|-------|--------------------------------------------|---|------|-----------|----------------------------------------------------|--------|----------|----------|---------|------|-------|----------|---------|-------|--------|------------------------------------------------------------------------------------------------|-----------------------------------|
| 11332 | dirMS_041712_NAR_120mM_plus.8223.8243.2    | 2 | 9.5  | 0.255E+05 | (R)IGKPAR(R)IG/K/P A/P D/K(R)                      | 96.73  | 486.7785 | 972.551  | -0.0016 | -1.6 | 8.59  | 125252.2 | 5.82    | HUMAN | AGN1W5 | Peroxidoxin 2, isoform CRA_a                                                                   |                                   |
| 11333 | dirMS_041712_NAR_20mM_plus.10731.10732.1   | 2 | 9.5  | 0.138E+05 | (R)AGTGG(R)IA G/T G/DVW/DV(L)E A/V T/R(K)          | 146.88 | 744.8731 | 1488.729 | -0.0011 | 0.1  | 6.7   | 403      | 57391.2 | 6.09  | HUMAN  | DA3175                                                                                         | D3-phosphoglycerate dehydrogenase |
| 11334 | dirMS_041712_NAR_20mM_plus.13172.13173.2   | 2 | 9.5  | 6.648E+04 | (R)IGAGT(R)IGVAGV/S V/DL/E A/L(K)R(N)              | 163.1  | 785.0191 | 1530.988 | -0.0077 | -1.2 | 15.12 | 15711.2  | 6.09    | HUMAN | KT7191 | ATP synthase subunit delta, mitochondrial (Fragment)                                           |                                   |
| 11335 | dirMS_041712_NAR_20mM_plus.7165.7202.2     | 2 | 9.5  | 0.368E+05 | M352mM (R)H8W(P)R(N)VIC AP G/A/G L/E R(K)          | 115.75 | 610.5700 | 1188.566 | -0.0071 | -1.7 | 5.75  | 77999.7  | 6.09    | HUMAN | PS2272 | Heterogeneous nuclear ribonucleoprotein M                                                      |                                   |
| 11336 | dirMS_041712_NAR_20mM_plus.7970.7970.2     | 2 | 9.5  | 0.571E+04 | (K)SVTEG(K)S V T E/Q/G/A/E(L)S/E E R(N)            | 124.88 | 774.8589 | 1548.714 | -0.0031 | -2   | 4.09  | 5919.6   | 4.73    | HUMAN | ESR6E1 | 14-3-3 protein zeta/delta (Fragment)                                                           |                                   |
| 11337 | dirMS_041712_NAR_30mM_plus.21829.21829.3   | 3 | 9.5  | 0.183E+05 | (K)GVQIA(K)Q V L/V/Q L/G L/S N/ N/ S R(K)          | 169.45 | 492.6036 | 1475.796 | -0.0003 | -0.2 | 9.75  | 36914.7  | 6.33    | HUMAN | PL4550 | Alcohol dehydrogenase (NADP+)                                                                  |                                   |
| 11338 | dirMS_041712_NAR_40mM_plus.11234.11234.3   | 3 | 9.5  | 1.732E+04 | (K)VAJEE(K)VA V/E/E D/V/M/T/P E/L L A(K)R(N)       | 132.55 | 563.9764 | 1033.915 | -0.0009 | -0.4 | 4.25  | 24372.8  | 6.06    | HUMAN | Q00487 | 26S proteasome non-ATPase regulatory subunit 14                                                |                                   |
| 11339 | dirMS_041712_NAR_40mM_plus.11308.11308.3   | 3 | 9.5  | 0.121E+05 | (K)FEAGLE(K)E A/E E L/K P E/E L/P/T G/V Q L(K)I    | 132.8  | 651.6782 | 1953.017 | -0.0025 | 1.3  | 4.32  | 108281.4 | 5.72    | HUMAN | PS3618 | Coatomer subunit beta                                                                          |                                   |
| 11340 | dirMS_041712_NAR_40mM_plus.17052.17052.3   | 3 | 9.5  | 0.119E+05 | (K)QJAVEP(K)Q I/A E/V V/V T/H E/L A/T G/T X(H)K    | 166.82 | 559.3259 | 1675.974 | -0.011  | -6.6 | 6.75  | 16120    | 9.05    | HUMAN | QY9V2  | Calcium-regulated heat stable protein 1                                                        |                                   |
| 11341 | dirMS_041712_NAR_50mM_plus.10699.10699.3   | 3 | 9.5  | 0.246E+06 | (R)MGKFF(R)M/Q/K E I/TVA/L(A)P/S/T M(K)I           | 124.03 | 516.9418 | 1548.812 | -0.0016 | -1   | 8.35  | 32616.5  | 5.18    | HUMAN | AGN176 | Actin, alpha skeletal muscle                                                                   |                                   |
| 11342 | dirMS_041712_NAR_50mM_plus.18984.18984.3   | 3 | 9.5  | 0.531E+05 | (R)MGKFF(R)M F G F/T/H/T/M F E/H S V A M A R(A)    | 108.58 | 661.3258 | 1981.959 | -0.0004 | 2    | 6.75  | 13701.1  | 8.86    | HUMAN | PR9179 | Putative RNA-binding protein 3                                                                 |                                   |
| 11343 | dirMS_041712_NAR_50mM_plus.9755.9755.3     | 3 | 9.5  | 1.104E+05 | (K)KJGKAT(K)K E/G E A/T/V/T G/P P G/K(Q)A          | 119.2  | 554.4519 | 1161.831 | -0.0094 | -3.7 | 4.56  | 5372.2   | 5.54    | HUMAN | Q91167 | RNA-binding protein 5                                                                          |                                   |
| 11344 | dirMS_041712_NAR_120mM_minus.18196.18196.3 | 3 | 9.49 | 1.292E+05 | (R)KJGSLG(R)K Q S L G E/V/L/G I/T N A R(K)         | 154.38 | 514.9655 | 1542.885 | -0.003  | -2   | 8.59  | 11075.7  | 5.65    | HUMAN | PG0174 | Triosephosphate isomerase                                                                      |                                   |
| 11345 | dirMS_041712_NAR_120mM_minus.9713.9713.3   | 3 | 9.49 | 1.641E+05 | (R)JLQTR(R)A R A E/Q A/E A/E I/V A/S L A R(K)      | 107.78 | 515.2649 | 1543.782 | -0.0022 | -1.4 | 4.79  | 12101.7  | 4.8     | HUMAN | DBR904 | Tropomyosin alpha-3 chain                                                                      |                                   |
| 11346 | dirMS_041712_NAR_20mM_minus.13328.13328.2  | 2 | 9.49 | 0.544E+05 | (K)QDAGT(K)D A G T/H I/L G L V L R(L)R             | 118.69 | 600.3403 | 1199.674 | -0.0009 | -0.8 | 5.84  | 17973    | 5.16    | HUMAN | EP905  | Heat shock cognate 71 kDa protein (Fragment)                                                   |                                   |
| 11347 | dirMS_041712_NAR_20mM_minus.14641.14641.2  | 2 | 9.49 | 0.835E+04 | (R)ITGTP(R)R I/T/T L/T G T A I F A(K)R             | 201.33 | 694.0277 | 1388.815 | -0.0007 | -0.5 | 8.75  | 38010.7  | 6.67    | HUMAN | Q15145 | Poly(C)-binding protein 1                                                                      |                                   |
| 11348 | dirMS_041712_NAR_20mM_minus.7085.7085.2    | 2 | 9.49 | 0.477E+05 | M282m (R)JAEAKS(R)A E I/A/E/S/M Y Q I(K)K          | 117.9  | 593.2759 | 1169.551 | -0.0098 | 0.9  | 4.53  | 37296.3  | 5.3     | HUMAN | F8VU64 | Keratin, type II cytoskeletal 8                                                                |                                   |
| 11349 | dirMS_041712_NAR_30mM_minus.14108.14108.2  | 2 | 9.49 | 0.219E+05 | (R)JGANDP(R)G A/N D/F/M/C O/E M E R(K)             | 130.03 | 737.7725 | 1474.54  | -0.0018 | -1.2 | 3.91  | 44227.3  | 7.81    | HUMAN | ET7Q86 | T-complex protein 1 subunit alpha                                                              |                                   |
| 11350 | dirMS_041712_NAR_50mM_plus.13630.13630.3   | 3 | 9.49 | 0.219E+04 | (R)DLSHG(R)R L S H I G D A/V(V)I/S C A(K)D         | 145.88 | 528.9397 | 1584.805 | -0.0005 | -0.3 | 5.21  | 29110.6  | 4.57    | HUMAN | PI2004 | Proliferating cell nuclear antigen                                                             |                                   |
| 11351 | dirMS_041712_NAR_50mM_minus.841.8156.3     | 3 | 9.49 | 0.191E+05 | (R)GVDSG(R)R/D/S/D P P R P R(L)K                   | 105.63 | 458.8971 | 1374.676 | 0.0007  | 0.5  | 5.96  | 45024.5  | 5.29    | HUMAN | BAE1F3 | Selenium-binding protein 1                                                                     |                                   |
| 11352 | dirMS_041712_NAR_120mM_plus.14542.14560.3  | 3 | 9.49 | 0.507E+05 | (K)KJGSP(K)K D/A/S Q/D I/H D I/V I/G V G S T R(K)  | 130.1  | 613.3369 | 1838.011 | -0.0169 | -9.2 | 6.75  | 45008.6  | 5.3     | HUMAN | AK8702 | Heat shock cognate 71 kDa protein                                                              |                                   |
| 11353 | dirMS_041712_NAR_20mM_plus.15233.15233.2   | 2 | 9.49 | 0.588E+04 | (R)JEQLAAI(R)E Q/L/A/L/A E/F A R(K)                | 176.1  | 574.312  | 1147.611 | 0.0061  | 5.3  | 4.53  | 44227.3  | 7.81    | HUMAN | ET7Q86 | T-complex protein 1 subunit alpha                                                              |                                   |
| 11354 | dirMS_041712_NAR_20mM_plus.16047.16047.2   | 2 | 9.49 | 0.477E+04 | (K)DAGTAK(K)Q AVG/T I/A/G L N/V/L R(K)             | 182.22 | 600.3422 | 1199.674 | -0.0029 | 2.4  | 5.84  | 19793    | 5.16    | HUMAN | EP905  | Heat shock cognate 71 kDa protein (Fragment)                                                   |                                   |
| 11355 | dirMS_041712_NAR_20mM_plus.19129.19129.3   | 3 | 9.49 | 0.199E+05 | (K)ITLQTS(K)K I/T L T G T S/A/L/P L/A Q L A F R(K) | 202.6  | 582.6516 | 1745.943 | -0.003  | -1.7 | 5.66  | 120546   | 7.82    | HUMAN | Q9Y546 | Protein transport protein Sec22A                                                               |                                   |
| 11356 | dirMS_041712_NAR_30mM_plus.10338.10387.2   | 2 | 9.49 | 0.788E+05 | (K)KVCQ(K)K V/L/D I/V D M F(R)K                    | 108.9  | 412.229  | 918.439  | -0.0008 | -0.9 | 5.81  | 52004.9  | 6.01    | HUMAN | Q15145 | Poly(C)-binding protein 1                                                                      |                                   |
| 11357 | dirMS_041712_NAR_30mM_plus.11281.11644.2   | 2 | 9.49 | 0.114E+06 | (R)ILVDM(R)R/L/D I/M/N/E R(G)                      | 113.78 | 447.2119 | 891.422  | -0.0054 | -6.1 | 4.37  | 73386.6  | 4.73    | HUMAN | BD4XQ7 | ATP-dependent RNA helicase DDX3Y                                                               |                                   |
| 11358 | dirMS_041712_NAR_30mM_plus.12548.12548.2   | 2 | 9.49 | 0.437E+05 | (R)GVDAI(R)G V/G I/D/A/D I/N R(Q)K                 | 118.17 | 579.2997 | 1157.591 | -0.0012 | 1    | 4.21  | 39641.8  | 8.93    | HUMAN | K7EQC3 | Keratin, type I cytoskeletal 9                                                                 |                                   |
| 11359 | dirMS_041712_NAR_30mM_plus.16201.16285.2   | 2 | 9.49 | 0.172E+05 | (K)YDLEW(K)Y I/Q I/E L W R(K)                      | 138.08 | 504.2687 | 1007.581 | -0.0008 | -0.8 | 6     | 26068.6  | 11.48   | HUMAN | E7EUW7 | Ribosomal protein L15 (Fragment)                                                               |                                   |
| 11360 | dirMS_041712_NAR_30mM_plus.16260.16260.3   | 3 | 9.49 | 0.138E+06 | (K)YDLEW(K)Y I/Q I/E L W R(K)                      | 138.08 | 504.2687 | 1007.581 | -0.0008 | -0.8 | 6     | 26068.6  | 11.48   | HUMAN | E7EUW7 | Ribosomal protein L15 (Fragment)                                                               |                                   |
| 11361 | dirMS_041712_NAR_30mM_plus.16860.18792.2   | 2 | 9.49 | 0.332E+05 | (R)JESLAL(R)E S U/L/A L/A Q/R(A)R                  | 152.07 | 529.8026 | 1058.534 | -0.0139 | -3.1 | 4.53  | 10721.8  | 8.85    | HUMAN | Q9A906 | Pre-mRNA-processing factor 4                                                                   |                                   |
| 11362 | dirMS_041712_NAR_40mM_plus.6195.6195.2     | 2 | 9.49 | 1.284E+05 | (R)YJSGG(R)R/SV/G G N Y/R D N(V)D(I)K              | 95.58  | 719.2857 | 1437.567 | -0.0024 | -1.7 | 4.21  | 11710.1  | 8.86    | HUMAN | P98179 | Putative RNA-binding protein 3                                                                 |                                   |
| 11363 | dirMS_041712_NAR_40mM_plus.7271.7271.2     | 2 | 9.49 | 0.967E+04 | (R)JSTSTN(R)R T/H S/T F/N Y R(K)                   | 102.65 | 488.2297 | 975.453  | -0.0009 | -0.9 | 8.46  | 43773.3  | 5.26    | HUMAN | F8VZ79 | Keratin, type I cytoskeletal 18                                                                |                                   |
| 11364 | dirMS_041712_NAR_50mM_plus.10993.11093.3   | 3 | 9.49 | 0.450E+05 | (R)JHGGPP(R)R G H P P A I Q/S L/V/L A/D N R(K)     | 125.48 | 484.6311 | 1451.438 | -0.0021 | -1.9 | 4.37  | 33689.9  | 6.06    | HUMAN | Q00487 | Heterogeneous nuclear ribonucleoprotein-related factor 1                                       |                                   |
| 11365 | dirMS_041712_NAR_50mM_plus.21426.21426.3   | 3 | 9.49 | 0.450E+06 | (R)JLHFMF(R)R H F F M P G/Y A/L/P L/T S R(G)       | 182.1  | 540.9498 | 1620.835 | -0.0007 | -0.4 | 9.75  | 42320.8  | 4.77    | HUMAN | AK6N28 | Putative tubulin beta chain-like protein ENSP000029037                                         |                                   |
| 11366 | dirMS_041712_NAR_50mM_plus.9280.9280.3     | 3 | 9.49 | 1.170E+06 | (R)JLQAEI(R)Q I/A E/E/E/G L K G R Q(A)             | 115.58 | 447.921  | 1341.748 | 0       | 0    | 6.4   | 56607.4  | 5.37    | HUMAN | F8VX84 | Keratin, type II cytoskeletal 8                                                                |                                   |
| 11367 | dirMS_041712_NAR_60mM_plus.9354.9362.3     | 3 | 9.49 | 1.491E+05 | (R)SJKNVY(R)G S N K L/V I/E/E/A E R(S)             | 110.73 | 448.9043 | 1344.712 | -0.0134 | -10  | 4.79  | 24255.9  | 7.81    | HUMAN | B7Z2F4 | T-complex protein 1 subunit delta                                                              |                                   |
| 11368 | dirMS_041712_NAR_60mM_plus.11817.11817.2   | 2 | 9.48 | 0.378E+05 | (K)MISDQ(K)M I/S I/G C/E/P G R(K)                  | 148.68 | 598.7911 | 1196.573 | -0.0021 | 1.7  | 5.75  | 21139.9  | 4.84    | HUMAN | H03199 | 26S proteasome non-ATPase regulatory subunit 4 (Fragment)                                      |                                   |
| 11369 | dirMS_041712_NAR_60mM_plus.16324.16324.2   | 2 | 9.48 | 0.191E+05 | (K)KCGM(K)K C/E G E/A/P C E R(K)                   | 142.52 | 497.3207 | 1391.635 | -0.001  | -0.7 | 6.05  | 37681.5  | 6.86    | HUMAN | B8F6F2 | Phosphorylase kinase                                                                           |                                   |
| 11370 | dirMS_041712_NAR_40mM_minus.14402.14402.3  | 3 | 9.48 | 1.343E+04 | (R)JLXJPS(R)R K L P S/V/P/L/V P S A Q Q T R(K)     | 169.28 | 530.6703 | 1589.999 | -0.0025 | -1.6 | 10    | 34958.1  | 9.42    | HUMAN | Q15785 | Mitochondrial import receptor subunit TOM34                                                    |                                   |
| 11371 | dirMS_041712_NAR_50mM_minus.10503.10503.3  | 3 | 9.48 | 1.146E+05 | (R)JLJLGP(R)R L/L/L/P G/P P A V A Q Q T R(K)       | 128.35 | 506.3182 | 1678.949 | -0.0088 | -5.1 | 6.14  | 139883.7 | 8.06    | HUMAN | PS3621 | Coatomer subunit alpha                                                                         |                                   |
| 11372 | dirMS_041712_NAR_50mM_plus.13611.13611.3   | 3 | 9.48 | 1.472E+05 | (K)QJGGLG(K)G E L/G P/M/V I/P L V S D P K R(T)     | 157.45 | 493.6566 | 1778.958 | -0.0059 | -1.6 | 8.75  | 22338.2  | 8.65    | HUMAN | Q00830 | Peroxidoxin-1                                                                                  |                                   |
| 11373 | dirMS_041712_NAR_50mM_plus.16322.16322.3   | 3 | 9.48 | 0.407E+05 | M203m (R)JLJLGP(R)R L/L/L/P G/P P A V A Q Q T R(K) | 170.31 | 493.6566 | 1778.958 | -0.0059 | -1.6 | 8.75  | 22338.2  | 8.65    | HUMAN | Q00830 | Peroxidoxin-1                                                                                  |                                   |
| 11374 | dirMS_041712_NAR_50mM_minus.17551.17551.3  | 3 | 9.48 | 0.407E+05 | M439m (K)VLVNAE(K)K L/A S/M G/D P I/N L R(H)M      | 111.03 | 496.9173 | 1473.732 | -0.0029 | 7.4  | 6.71  | 57818.1  | 5.5     | HUMAN | EP905  | X-ray repair complementing defective repair in Chinese hamster cells 6 (Ku autoantigen, 70kDa) |                                   |
| 11375 | dirMS_041712_NAR_60mM_minus.10281.10281.3  | 3 | 9.48 | 0.576E+05 | (K)QAVAR(K)K Q I/V I/A R P G G D T I/F F K(I)K     | 117.83 | 422.6235 | 1416.759 | -0.0034 | -7.8 | 4.79  | 7323.5   | 9.4     | HUMAN | DBR60C | Histidine triad nucleotide-binding protein 1                                                   |                                   |
| 11376 | dirMS_041712_NAR_60mM_plus.19329.19329.3   | 3 | 9.48 | 0.454E+05 | (R)THNGES(R)T H H G E S V/S I/V F H V I P L(L)     | 171.93 | 596.2923 | 1786.876 | -0.0135 | -2.6 | 5.92  | 24482.9  | 7.96    | HUMAN | B1A1A9 | Phosphoribosyl pyrophosphate synthetase 1                                                      |                                   |
| 11377 | dirMS_041712_NAR_60mM_plus.9332.9332.3     | 3 | 9.48 | 1.736E+05 | (K)SDDEG(K)S V/L P/L D P/P D Q R(K)                | 101.62 | 508.5978 | 1521.781 | -0.0024 | -1.6 | 4.56  | 12721.6  | 6.75    | HUMAN | BD41J2 | Ubiquitin                                                                                      |                                   |
| 11378 | dirMS_041712_NAR_60mM_plus.9147.9147.2     | 2 | 9.48 | 0.967E+05 | (K)QIYDEY(K)Q I/Q D/E I S G P S I/V N R(K)         | 110.35 | 758.8539 | 1516.703 | -0.0021 | -1.4 | 4.65  | 123097.1 | 5.83    | HUMAN | AS43E0 | POTE ankyrin domain family member F                                                            |                                   |
| 11379 | dirMS_041712_NAR_120mM_plus.7172.7172.2    | 2 | 9.48 | 1.477E+05 | (K)KSLD(E)M/E/M E/K/Q/Q(K)                         | 91.38  | 632.3059 | 1263.6   | 0.0047  | 3.8  | 4.68  | 26419.2  | 5.1     | HUMAN | HOYK97 | Splicing factor, proline- and glutamine-rich (Fragment)                                        |                                   |
| 11380 | dirMS_041712_NAR_120mM_plus.9575.9575.3    | 3 | 9.48 | 1.595E+05 | (R)NRYRDN(R)R Y N R D I/Y A Q C/R X(W)K            | 130.37 | 493.5459 | 1478.648 | 0.002   | 1.4  | 8.49  | 34221.3  | 6.44    | HUMAN | PI5924 | Desmoplakin                                                                                    |                                   |
| 11381 | dirMS_041712_NAR_20mM_plus.10457.10457.2   | 2 | 9.48 | 0.131E+06 | (K)SYPFLE(K)S Y I/P/L D P/P V F(K)K                | 144.22 | 617.3053 | 1233.6   | 0.0036  | 2.9  | 4.4   | 35566.4  | 9.3     | HUMAN | TZ28B3 | Transaldolase                                                                                  |                                   |
| 11382 | dirMS_041712_NAR_20mM_plus.17942.17942.2   | 2 | 9.48 | 1.178E+05 | (K)KVGDF(K)K G A D F I/L V/G V G G Q S L/G S K(R)  | 197.05 | 490.4414 | 1375.876 | -0.0004 | -2.2 | 4.14  | 3426.4   | 6.04    | HUMAN | Q15145 | Poly(C)-binding protein 1                                                                      |                                   |
| 11383 | dirMS_041712_NAR_30mM_plus.10020.10020.2   |   |      |           |                                                    |        |          |          |         |      |       |          |         |       |        |                                                                                                |                                   |

|       |                                            |   |      |           |                                               |        |          |          |          |       |      |         |       |       |        |                                                               |
|-------|--------------------------------------------|---|------|-----------|-----------------------------------------------|--------|----------|----------|----------|-------|------|---------|-------|-------|--------|---------------------------------------------------------------|
| 11441 | dirMS_041712_NAR_50mM_minus.16889.16889.3  | 3 | 9.45 | 0.244E+05 | (R)IGLEGLS(R)G(V)G/LS/LN/VN/LK                | 164.18 | 464.9452 | 1392.821 | 0.0001   | 0.1   | 6.75 | 177928  | 5.42  | HUMAN | Q8NYU2 | UDP-glucose-glycoprotein glucosyltransferase 1                |
| 11442 | dirMS_041712_NAR_50mM_minus.7208.7208.3    | 3 | 9.45 | 0.166E+05 | (R)HTPSHR(R)EYFHS/PGLV/DPA/AKVK               | 107.98 | 516.9396 | 1547.779 | -0.0008  | -2.4  | 4.65 | 67446.5 | 5.63  | HUMAN | FBV021 | LM domain and actin-binding protein                           |
| 11443 | dirMS_041712_NAR_120mM_plus.5714.5714.3    | 3 | 9.45 | 2.478E+05 | (R)IKDQK(R)KATK/TAT/TA/NA/KN/KIG              | 61.03  | 456.4282 | 1693.822 | 0.0002   | 0.2   | 9.15 | 1798.90 | 6.07  | HUMAN | Q8Y0C2 | Cytocokerin 2                                                 |
| 11444 | dirMS_041712_NAR_120mM_plus.6752.6752.2    | 2 | 9.45 | 0.508E+05 | (R)HJTHGHR(R)LT/GF/E/V/K                      | 88.68  | 480.743  | 960.479  | 0.0002   | 0.2   | 5.4  | 26394.9 | 6.5   | HUMAN | BSM5F5 | GTP-binding nuclear protein Ran                               |
| 11445 | dirMS_041712_NAR_30mM_plus.10713.10713.2   | 2 | 9.45 | 0.856E+05 | (R)JLAEEVA(R)LA/EVA/E/A/LK/E                  | 146.92 | 536.7941 | 1072.589 | -0.0075  | -7    | 4.25 | 533778  | 5.74  | HUMAN | Q15149 | Plectin                                                       |
| 11446 | dirMS_041712_NAR_20mM_plus.14444.14444.2   | 2 | 9.45 | 0.159E+04 | (R)KTVFVGT(K)TV/VF/GV/P/D/LTR(E)              | 171.18 | 617.3237 | 1233.647 | -0.0073  | -5.9  | 4.37 | 53219.8 | 5.66  | HUMAN | Q969F4 | Cytosolic non-specific dipeptidase                            |
| 11447 | dirMS_041712_NAR_20mM_plus.14518.14518.2   | 2 | 9.45 | 0.571E+05 | (R)AVLVQV(R)VLV/LV/D/EP/D/T/R/D/SV/R(S)       | 116.75 | 408.4082 | 1663.832 | -0.0002  | -3.8  | 4.68 | 13112.4 | 5.23  | HUMAN | FBW813 | Tubulin beta-b chain                                          |
| 11448 | dirMS_041712_NAR_30mM_plus.18194.18194.2   | 2 | 9.45 | 0.139E+05 | (R)QIOTNR(R)Q/T/LM/D/VL/PV/V                  | 148    | 613.3465 | 1225.69  | -0.0042  | -3.4  | 5.84 | 18498.6 | 5.82  | HUMAN | HF73TA | Peroxiredoxin-4 (Fragment)                                    |
| 11449 | dirMS_041712_NAR_40mM_plus.15124.15124.3   | 3 | 9.45 | 0.353E+05 | (R)JQVGGQ(R)D/Q/G/D/V/V/G/CRP/LSKT)           | 156.92 | 662.6815 | 1986.033 | -0.0025  | -14.3 | 4.56 | 18601.6 | 10.52 | HUMAN | PEZ280 | 40S ribosomal protein S11                                     |
| 11450 | dirMS_041712_NAR_40mM_plus.7021.7021.2     | 2 | 9.45 | 0.161E+05 | (R)RQIETLR(R)LE/VL/T/G/V/K                    | 101.52 | 523.282  | 1045.552 | 0.0043   | 4.1   | 4.53 | 13588.1 | 4.66  | HUMAN | FBP767 | Keratin, type II cytoskeletal-8 (Fragment)                    |
| 11451 | dirMS_041712_NAR_50mM_plus.7371.7371.3     | 3 | 9.45 | 0.803E+04 | (R)GUGGQ(R)R/G/LVQ/G/GIG/PV/G/Q/G/P/R(G)      | 105.47 | 673.1388 | 1341.666 | 0.0005   | 0.4   | 9.75 | 7682.2  | 5.53  | HUMAN | P23246 | Splicing factor, proline- and glutamine-rich                  |
| 11452 | dirMS_041712_NAR_50mM_plus.18021.18021.3   | 3 | 9.45 | 1.751E+05 | (R)KUGVEVQ(R)K/LV/LV/G/VG/V/R                 | 140.07 | 607.4615 | 1209.019 | -0.0019  | -1.9  | 6.07 | 66105.5 | 7.1   | HUMAN | ABM5F5 | Flag-tag mental retardation protein 1                         |
| 11453 | dirMS_041712_NAR_50mM_plus.20021.20021.3   | 3 | 9.45 | 1.108E+05 | (R)KSVSSGG(K)S/VL/S/G/L/D/LA/FI/GK/TK)        | 174.18 | 545.3029 | 1633.916 | -0.0218  | -13.3 | 5.79 | 22133.2 | 4.82  | HUMAN | ESR6F9 | Protein FAM114A2 (Fragment)                                   |
| 11454 | dirMS_041712_NAR_50mM_plus.7078.7078.3     | 3 | 9.45 | 1.980E+04 | (R)JMLQAD(R)M/LQ/D/P/N/K/V/S/R/A/R)           | 102.5  | 441.9033 | 1329.694 | 0.001    | 0.8   | 8.5  | 55722.8 | 6.78  | HUMAN | Q9Y310 | tRNA-splicing ligase RtcB homolog                             |
| 11455 | dirMS_041712_NAR_60mM_plus.8306.8306.3     | 3 | 9.45 | 1.502E+05 | (R)LSLQGV(R)LS/LJ/G/V/N/T/E/T/R/KV)           | 101.63 | 548.9488 | 1644.83  | -0.0041  | -2.5  | 4.79 | 36336.9 | 7.84  | HUMAN | ABM729 | Fructose-bisphosphate aldolase                                |
| 11456 | dirMS_041712_NAR_60mM_plus.8800.8802.3     | 3 | 9.45 | 1.150E+05 | (R)RSRHR(E)S/R/V/R/S/V/R(K)                   | 103.83 | 416.8777 | 1043.539 | 203.0001 | 0.5   | 10   | 69591.5 | 5.68  | HUMAN | ANJH88 | Putative SAGE-1-like protein                                  |
| 11457 | dirMS_041712_NAR_120mM_minus.9097.9097.2   | 2 | 9.44 | 0.562E+05 | (R)KHVFLS(K)H/F/D/G/L/N/T/T/V/KV)             | 103.4  | 609.8267 | 1218.648 | -0.0016  | -13.3 | 8.76 | 63374.2 | 8.64  | HUMAN | PO6744 | Glucose-6-phosphate isomerase                                 |
| 11458 | dirMS_041712_NAR_40mM_minus.13123.13123.3  | 3 | 9.44 | 1.920E+04 | (R)KVLDSGA(K)V/L/D/S/G/V/P/PV/P/G/P/L/R(R)    | 160.87 | 640.3618 | 1919.096 | -0.0252  | -13.1 | 6.04 | 53307.5 | 5.25  | HUMAN | FBP7V9 | ATP synthase subunit beta                                     |
| 11459 | dirMS_041712_NAR_40mM_minus.15779.15779.3  | 3 | 9.44 | 0.688E+05 | (R)KGLAPD(K)K/LV/LP/D/E/P/LV/H/L/K/K          | 184.38 | 565.3111 | 1693.916 | 0.0028   | 1.7   | 4.54 | 16789.5 | 10.63 | HUMAN | JKM5X5 | 40S ribosomal protein S13                                     |
| 11460 | dirMS_041712_NAR_40mM_minus.8147.8147.3    | 3 | 9.44 | 0.215E+05 | (R)KQASDA(K)K/A/S/D/A/M/T/EP/PT/H/P/R(L)      | 128.43 | 612.6484 | 1819.937 | -0.0536  | -0.7  | 5.32 | 12265.1 | 4.4   | HUMAN | Q7KX20 | 14-3-3 protein epsilon (Fragment)                             |
| 11461 | dirMS_041712_NAR_40mM_minus.9260.9260.3    | 3 | 9.44 | 0.131E+05 | (R)KVGASLA(K)K/QA/IS/L/A/N/T/T/T/G/H/A/E/T(K) | 137.35 | 654.0087 | 1960.013 | -0.0019  | -1    | 6.72 | 11802.2 | 5.6   | HUMAN | DR6DQ3 | Transcription factor BTf3 (Fragment)                          |
| 11462 | dirMS_041712_NAR_50mM_minus.12078.12078.3  | 3 | 9.44 | 1.194E+05 | (R)RLATAL(R)A/L/T/A/Q/L/K/E/E/K/A)            | 137.03 | 481.9385 | 1443.805 | -0.0044  | -3    | 4.79 | 31923.6 | 4.85  | HUMAN | BZ7596 | Tropomyosin alpha-1 chain                                     |
| 11463 | dirMS_041712_NAR_50mM_minus.12465.12465.3  | 3 | 9.44 | 0.290E+05 | (R)KQASDA(K)K/A/S/D/A/M/T/EP/PT/H/P/R(L)      | 128.43 | 607.3158 | 1819.937 | -0.0402  | -2.3  | 5.32 | 12926.1 | 4.4   | HUMAN | Q7KX20 | 14-3-3 protein epsilon (Fragment)                             |
| 11464 | dirMS_041712_NAR_50mM_minus.4950.4950.3    | 3 | 9.44 | 1.433E+05 | (R)KJAEDE(R)K/LV/D/D/D/D/D/V/D/T/K(K)         | 93.27  | 522.5622 | 1565.645 | -0.0029  | -1.8  | 3.76 | 14966.2 | 3.71  | HUMAN | BBZ2A1 | Thymosin alpha-1                                              |
| 11465 | dirMS_041712_NAR_50mM_minus.894.8943.3     | 3 | 9.44 | 1.136E+05 | (R)KIDQEA(K)K/V/D/E/A/Y/M/N/K/V/L/S/R(L)      | 118.62 | 605.2917 | 1797.832 | 0.0001   | 0.8   | 4.18 | 13388.1 | 4.66  | HUMAN | FBP797 | Keratin, type II cytoskeletal-8 (Fragment)                    |
| 11466 | dirMS_041712_NAR_60mM_minus.11821.11821.3  | 3 | 9.44 | 1.461E+05 | (R)MIMS(N)K(R)M/S/K/E/VQ/LQ/V/N/Q/N(K)        | 125.58 | 647.3011 | 1923.897 | 0.0015   | -1.8  | 4.68 | 40069.4 | 4.83  | HUMAN | FEVW11 | Tubulin beta chain                                            |
| 11467 | dirMS_041712_NAR_60mM_minus.13352.13352.3  | 3 | 9.44 | 1.489E+05 | (R)KTEVLE(K)K/T/E/V/L/D/S/P/G/V/K)            | 143.93 | 493.5966 | 1478.774 | 0.0051   | 1     | 4.68 | 46335.4 | 6.29  | HUMAN | EPB851 | Phosphoribosylaminimidazole carboxylase                       |
| 11468 | dirMS_041712_NAR_60mM_minus.4986.4986.3    | 3 | 9.44 | 1.111E+05 | (R)KSDVQ(K)S/V/V/L/D/A/S/Q/S/R(K)             | 82.27  | 452.2129 | 1354.623 | 0.0002   | 0.6   | 4.56 | 32616.5 | 5.18  | HUMAN | ABN176 | Actin, alpha skeletal muscle                                  |
| 11469 | dirMS_041712_NAR_120mM_plus.6604.6604.2    | 2 | 9.44 | 0.524E+05 | (R)KJAEDE(R)K/V/D/E/A/Y/M/N/K/V/L/S/R(L)      | 87.48  | 584.2813 | 1617.574 | -0.0003  | -0.3  | 6.07 | 66105.5 | 7.1   | HUMAN | ABM5F5 | Flag-tag mental retardation protein 1                         |
| 11470 | dirMS_041712_NAR_120mM_plus.8705.8705.3    | 3 | 9.44 | 1.430E+04 | (R)RQJQE(R)R/Q/G/E/LV/L/L/E/N/R(L)            | 99.1   | 548.2767 | 1642.814 | 0.0012   | 0.7   | 4.49 | 23903.4 | 4.94  | HUMAN | HYD0N1 | Plectin (Fragment)                                            |
| 11471 | dirMS_041712_NAR_20mM_plus.11989.11989.2   | 2 | 9.44 | 0.674E+04 | (R)KLIANN(K)V/L/I/A/N/V/G/A/V/K(K)            | 155.83 | 591.8632 | 1182.72  | -0.0014  | -1.2  | 8.72 | 29989.9 | 5.92  | HUMAN | FBW8T8 | Acetyl-CoA carboxylase 2                                      |
| 11472 | dirMS_041712_NAR_20mM_plus.12512.12512.2   | 2 | 9.44 | 0.139E+05 | (R)KIHNSAC(K)I/S/N/AS/C/T/T/N/L/A/P/L/A(K)    | 159.55 | 591.4626 | 1833.92  | -0.0018  | -1.5  | 8.75 | 31718.5 | 7.17  | HUMAN | LE7U14 | Glycerol-3-phosphate dehydrogenase                            |
| 11473 | dirMS_041712_NAR_20mM_plus.12805.12805.2   | 2 | 9.44 | 0.320E+05 | (R)KJAEDE(R)K/V/D/E/A/Y/M/N/K/V/L/S/R(L)      | 87.48  | 584.2813 | 1617.574 | -0.0003  | -0.3  | 6.07 | 66105.5 | 7.1   | HUMAN | ABM5F5 | Flag-tag mental retardation protein 1                         |
| 11474 | dirMS_041712_NAR_20mM_plus.8124.8124.2     | 2 | 9.44 | 0.833E+05 | (R)KJAEDE(R)K/V/D/E/A/Y/M/N/K/V/L/S/R(L)      | 125.18 | 731.8435 | 1446.689 | -0.0504  | -3.1  | 4.14 | 40069.4 | 4.83  | HUMAN | FEVW11 | Tubulin beta chain                                            |
| 11475 | dirMS_041712_NAR_20mM_plus.8843.8843.2     | 2 | 9.44 | 0.576E+05 | (R)KJGLDVE(R)G/L/D/V/D/V/K(K)                 | 131.6  | 437.7292 | 874.452  | -0.0005  | -0.6  | 4.03 | 61018.6 | 4.84  | HUMAN | BADLW8 | Probable ATP-dependent RNA helicase DXD5                      |
| 11476 | dirMS_041712_NAR_30mM_plus.15251.15251.2   | 2 | 9.44 | 0.529E+05 | (R)JIAUFLR(R)A/Y/L/F/K(K)                     | 132.15 | 413.2445 | 825.487  | -0.0052  | -6.3  | 8.59 | 15830.9 | 5.16  | HUMAN | JKRFS5 | Keratin heavy chain 1 (Fragment)                              |
| 11477 | dirMS_041712_NAR_30mM_plus.14474.14474.2   | 2 | 9.44 | 0.369E+05 | (R)KSYTGR(R)S/V/T/S/G/P/G/S/R(K)              | 73.02  | 456.2155 | 913.422  | 0.0002   | 2.2   | 8.46 | 19388.4 | 10.19 | HUMAN | FBV0Y3 | Clathrin, type II cytoskeletal-8 (Fragment)                   |
| 11478 | dirMS_041712_NAR_30mM_plus.5901.5901.2     | 2 | 9.44 | 0.175E+05 | (R)KJAEDE(R)K/V/D/E/A/Y/M/N/K/V/L/S/R(L)      | 85.63  | 448.2113 | 895.416  | -0.0003  | -0.3  | 4.25 | 54793.4 | 10.51 | HUMAN | Q7KX20 | 14-3-3 protein epsilon (Fragment)                             |
| 11479 | dirMS_041712_NAR_50mM_plus.13527.13527.3   | 3 | 9.44 | 1.188E+05 | (R)QIATKQ(R)A/T/K/D/G/T/A/G/L/V/L/R(L)        | 140    | 543.3085 | 1627.913 | -0.0015  | -1    | 8.75 | 17973   | 5.16  | HUMAN | EPB665 | Heat shock cognate 71 kDa protein (Fragment)                  |
| 11480 | dirMS_041712_NAR_60mM_plus.18436.18436.3   | 3 | 9.44 | 1.790E+05 | (R)KJWFKR(K)V/N/K/Q/M/A/V/S/N/L/R(L)          | 153    | 571.6293 | 1712.879 | -0.0055  | -3.2  | 8.69 | 14683.8 | 10.19 | HUMAN | P37108 | Signal recognition particle 14 kDa protein                    |
| 11481 | dirMS_041712_NAR_120mM_minus.11534.11591.4 | 4 | 9.43 | 2.159E+06 | (R)KJGAPG(K)A/G/P/S/V/P/R/T/E/E/F/K(K)        | 117.18 | 472.5042 | 1886.997 | -0.0021  | -1.1  | 6.23 | 55361.8 | 6.42  | HUMAN | G5E452 | Protein disulfide isomerase family A, member 3, isoform CRA_b |
| 11482 | dirMS_041712_NAR_120mM_minus.11917.11917.3 | 3 | 9.43 | 0.350E+05 | (R)KJAEDE(R)K/V/D/E/A/Y/M/N/K/V/L/S/R(L)      | 87.48  | 584.2813 | 1617.574 | -0.0003  | -0.3  | 6.07 | 66105.5 | 7.1   | HUMAN | ABM5F5 | Flag-tag mental retardation protein 1                         |
| 11483 | dirMS_041712_NAR_30mM_plus.12880.12889.2   | 2 | 9.43 | 0.688E+05 | (R)KJGAEAR(K)G/L/A/E/R/H/E                    | 123.3  | 450.7604 | 900.515  | -0.0014  | -1.5  | 4.53 | 26744.2 | 7.15  | HUMAN | Q7K6E4 | Acetyl-CoA carboxylase 1 (Fragment)                           |
| 11484 | dirMS_041712_NAR_30mM_minus.5257.5257.2    | 2 | 9.43 | 0.621E+05 | (R)JITDGT(R)I/T/D/G/E/P/M/R(R)                | 82.35  | 482.2145 | 963.427  | 0.0017   | 1.8   | 4.37 | 85057.6 | 4.94  | HUMAN | Q07900 | Heat shock protein HSP 90-alpha                               |
| 11485 | dirMS_041712_NAR_50mM_plus.17059.17059.3   | 3 | 9.43 | 0.644E+04 | (R)RVLTLR(R)R/LV/T/LH/L/T/A/E/R(K)            | 165.27 | 436.6957 | 1307.805 | -0.002   | -1.5  | 6.75 | 45212.4 | 4.94  | HUMAN | Q7Z233 | Acetyl-CoA acetyltransferase, cytosolic                       |
| 11486 | dirMS_041712_NAR_60mM_plus.10246.10246.3   | 3 | 9.43 | 1.236E+04 | (R)KJVDQV(R)K/V/D/E/A/Y/M/N/K/V/L/S/R(L)      | 116.03 | 405.2791 | 1797.832 | -0.0504  | -2.9  | 4.18 | 13388.1 | 4.66  | HUMAN | FBP797 | Keratin, type II cytoskeletal-8 (Fragment)                    |
| 11487 | dirMS_041712_NAR_60mM_plus.10626.10626.3   | 3 | 9.43 | 0.144E+05 | (R)KJLVNCR(R)D/L/N/V/C/F/S/G/S/M/D/R(N)       | 119.2  | 539.8863 | 1601.647 | -0.0572  | -1.4  | 5.21 | 43731.6 | 5.93  | HUMAN | EP9C77 | Heterogeneous nuclear ribonucleoprotein H                     |
| 11488 | dirMS_041712_NAR_60mM_plus.11607.11607.3   | 3 | 9.43 | 0.225E+05 | (R)KJADGGR(K)A/D/D/R/F/R/P/V/Q/K(S)           | 124.53 | 448.2317 | 1342.711 | -0.0146  | -1.6  | 6.16 | 15633.5 | 9.15  | HUMAN | HKBMQ8 | Fructose-bisphosphate aldolase A (Fragment)                   |
| 11489 | dirMS_041712_NAR_60mM_plus.7094.7094.3     | 3 | 9.43 | 1.236E+04 | (R)KJGAEAR(K)G/L/A/E/R/H/E                    | 98.43  | 534.9257 | 1602.761 | 0.0002   | 1.2   | 4.18 | 88979.1 | 4.58  | HUMAN | Q3ZM24 | Leucine-rich repeat flightless-interacting protein 1          |
| 11490 | dirMS_041712_NAR_120mM_plus.18491.18491.3  | 3 | 9.43 | 1.609E+04 | (R)KJHEALS(K)H/E/L/E/S/H/V/K/T/R(S)           | 149.78 | 613.3075 | 1821.928 | -0.0504  | -7.9  | 6.02 | 90088.3 | 5.78  | HUMAN | Q8Y0C2 | Proteinase-induced-blocking factor 1                          |
| 11491 | dirMS_041712_NAR_120mM_plus.11950.11950.3  | 3 | 9.43 | 0.633E+05 | (R)KJGAEAR(K)G/L/A/E/R/H/E                    | 116.03 | 405.2791 | 1797.832 | -0.0504  | -2.7  | 5.84 | 10246.3 | 5.93  | HUMAN | EP9C77 | Heterogeneous nuclear ribonucleoprotein H                     |
| 11492 | dirMS_041712_NAR_30mM_plus.18532.18532.2   | 2 | 9.43 | 0.154E+05 | (R)KJMLDQ(R)A/M/L/D/Q/L/M/G/S/R(D)            | 150.35 | 611.8    | 1222.592 | 0.0009   | 0.7   | 5.88 | 5509.4  |       |       |        |                                                               |



|       |                                            |   |      |                 |                                                      |        |          |          |          |       |      |          |       |       |        |                                                               |
|-------|--------------------------------------------|---|------|-----------------|------------------------------------------------------|--------|----------|----------|----------|-------|------|----------|-------|-------|--------|---------------------------------------------------------------|
| 11659 | dirMS_041712_NAR_20mM_plus.18030.18030.2   | 2 | 9.35 | 0.134E+05       | (R)IFDQAR(R)I/F/D/QA/P/G/L/P(R)L                     | 195.53 | 582.3166 | 1163.621 | 0.0052   | 4.4   | 5.84 | 20576.9  | 4.84  | HUMAN | FBW024 | Head shock protein beta-1                                     |
| 11660 | dirMS_041712_NAR_30mM_plus.22167.22167.2   | 2 | 9.35 | 0.279E+05       | (K)NGLG(R)I/V/G/V/L/G(V)A/T/S/F/F/E/R(N)             | 172.62 | 762.8926 | 1524.781 | -0.0025  | -1.7  | 5.97 | 73641.5  | 6.74  | HUMAN | OD0071 | ATP-dependent RNA helicase DDX3X                              |
| 11661 | dirMS_041712_NAR_30mM_plus.22965.22965.2   | 2 | 9.35 | 0.246E+05       | (R)EISDF(R)E/L/S/D/F/E/V/S/L/S/C/V/F/P(K)H           | 177.17 | 571.22   | 1370.959 | -0.007   | -4.7  | 6.21 | 46011.4  | 6.42  | HUMAN | CS1462 | Protein disulfide isomerase family A, member 3, isoform CRA_b |
| 11662 | dirMS_041712_NAR_40mM_plus.11290.11290.3   | 3 | 9.35 | 0.121E+05       | (K)IEAGEL(K)A/E/V/L/E/K/E/E/T/V/T/G/P/V/Q(K)L        | 132.8  | 651.6782 | 1953.017 | -0.0025  | 1.3   | 4.32 | 108281.4 | 5.72  | HUMAN | PS3818 | Customer support protein 1                                    |
| 11663 | dirMS_041712_NAR_40mM_plus.17433.17433.3   | 3 | 9.35 | 0.684E+04       | (R)HIFPLA(R)H F P L A I Y V I S A E K(A)             | 166.77 | 586.3246 | 1756.963 | -0.004   | -2.3  | 6.75 | 49012.3  | 4.9   | HUMAN | AMBU81 | Tubulin alpha-4A chain                                        |
| 11664 | dirMS_041712_NAR_50mM_plus.13228.13228.3   | 3 | 9.35 | 1.946E+05       | (K)ASLAET(K)A/S/L/A/E/T/D/K/T/L/E/V(A)K(H)           | 137.47 | 530.2925 | 1588.879 | -0.0163  | -10.2 | 4.68 | 45077.2  | 5.47  | HUMAN | BTZ185 | V-type proton ATPase catalytic subunit A                      |
| 11665 | dirMS_041712_NAR_50mM_plus.21638.21638.3   | 3 | 9.35 | 1.455E+05       | (K)AENVE(K)K/A/E/R/E/V/I/S/L/S/C/V/F/P(K)H           | 149.1  | 622.266  | 1584.959 | -0.0027  | -1.3  | 4.68 | 118312   | 7.77  | HUMAN | ESK25  | Dynamin-like 120kDa protein, mitochondrial                    |
| 11666 | dirMS_041712_NAR_50mM_plus.5167.5167.3     | 3 | 9.35 | 0.137E+06       | (K)ITAPDQ(K)M/T/I/T/P/Q/A/Q/E/H/X(K)L                | 86.38  | 485.774  | 1466.723 | -0.0057  | 3.9   | 5.37 | 31075.7  | 5.65  | HUMAN | RG0174 | Triosephosphate isomerase                                     |
| 11667 | dirMS_041712_NAR_60mM_plus.11018.11018.3   | 3 | 9.35 | 1.666E+05       | (R)VADEF(R)A/V/D/R/F/P/C/M/C/Q/G/R(K)                | 115.05 | 508.237  | 1522.689 | -0.0079  | 4.9   | 6.12 | 56522.6  | 6.66  | HUMAN | B4D073 | Phosphoenolpyruvate carboxylase [GTP], mitochondrial          |
| 11668 | dirMS_041712_NAR_60mM_plus.12688.12817.3   | 3 | 9.35 | 1.324E+05       | (R)ILMVTW(R)N/L/N/T/W/N/R/Y/P/D/K(M)                 | 123.17 | 531.2853 | 1591.823 | 0.0186   | 11.7  | 8.59 | 470342.8 | 6.83  | HUMAN | E7L0Y0 | DNA-dependent protein kinase catalytic subunit                |
| 11669 | dirMS_041712_NAR_60mM_plus.16452.16452.3   | 3 | 9.35 | 1.380E+04       | (R)HIVYR(R)G/V/F/R/A/S/E/I/E/G/P/D/V(R)W             | 142.8  | 591.9752 | 1773.913 | -0.0019  | -1.1  | 4.41 | 87447.6  | 6.84  | HUMAN | Q15347 | Protein transport protein Sec23B                              |
| 11670 | dirMS_041712_NAR_60mM_plus.7174.7174.3     | 3 | 9.35 | 0.432E+05       | (K)HSPSK(R)K/S/L/P/G/N/L/A/L/D/V/P/K(R)Z             | 95.72  | 514.6014 | 1607.2   | -0.004   | 4.4   | 5.71 | 36027    | 6.85  | HUMAN | Q95297 | Heterogeneous nuclear ribonucleoprotein F                     |
| 11671 | dirMS_041712_NAR_60mM_plus.9662.9662.3     | 3 | 9.35 | 0.953E+05       | (K)GHNEH(K)H E N V E(V)A/I/Q/A/E Y E I F(K)          | 90.63  | 563.2692 | 1687.792 | 0.0008   | 0.5   | 4.48 | 61363    | 8.73  | HUMAN | CJ0509 | Propionyl-CoA carboxylase beta chain, mitochondrial           |
| 11672 | dirMS_041712_NAR_120mM_minus.7029.7029.2   | 2 | 9.34 | 1.140E+05       | (K)JAPPEN(K)I/H I J P P E R K(Y)                     | 102.62 | 462.2871 | 923.567  | -0.0004  | -0.4  | 8.75 | 32616.5  | 5.18  | HUMAN | ANL176 | Actin, alpha skeletal muscle                                  |
| 11673 | dirMS_041712_NAR_30mM_minus.11215.11215.2  | 2 | 9.34 | 0.132E+05       | (R)IAMEG(R)A/M/G/E/Q/A/V/A/L/A/R(A)                  | 114.68 | 558.7916 | 1156.583 | -0.0071  | -6.3  | 6.05 | 80855.1  | 7.31  | HUMAN | PO5165 | Propionyl-CoA carboxylase alpha chain, mitochondrial          |
| 11674 | dirMS_041712_NAR_30mM_minus.18760.18760.2  | 2 | 9.34 | 0.235E+05       | (K)YVQL(K)K/V/Y/P/Q/L/L/P/G/D(R)K                    | 156.45 | 528.008  | 1056.62  | 0.0047   | 4.4   | 8.75 | 45238.3  | 6.03  | HUMAN | F5H737 | Adenosylhomocysteinase                                        |
| 11675 | dirMS_041712_NAR_30mM_minus.6232.6232.2    | 2 | 9.34 | 0.118E+05       | (K)IMJAM(K)M/G/A/S/T/T/A/K(K)                        | 88.03  | 484.7299 | 968.454  | -0.0014  | -1.5  | 8.5  | 23963.2  | 8.9   | HUMAN | QU90N3 | Charged multivesicular body protein 2b                        |
| 11676 | dirMS_041712_NAR_50mM_minus.12081.12081.3  | 3 | 9.34 | 1.178E+05       | (K)SAPSP(K)S/A/P/S/P/Q/E/S/L/C/L/R(L)                | 132.27 | 569.6251 | 1706.853 | 0.0077   | 4.5   | 8.46 | 23209    | 6.92  | HUMAN | BA0041 | Malate dehydrogenase, cytoplasmic                             |
| 11677 | dirMS_041712_NAR_60mM_minus.8215.8215.3    | 3 | 9.34 | 2.102E+05       | (K)NLPVSK(R)K L V I P S V Q K A N D D W Q/K/T(D)N(I) | 105.99 | 609.9772 | 1827.92  | -0.0025  | -1.4  | 5.96 | 11018.4  | 8.89  | HUMAN | BD0475 | N-alpha-glucosyltransferase 50                                |
| 11678 | dirMS_041712_NAR_120mM_plus.8281.8281.4    | 4 | 9.34 | 2.105E+05       | (R)ITAFSFR(R)T A I S F S E S R A D E V A P A F K(A)  | 96.9   | 449.2325 | 1793.903 | 0.0054   | 3     | 5.85 | 91839.6  | 9.22  | HUMAN | BE9190 | ATP-citrate synthase                                          |
| 11679 | dirMS_041712_NAR_20mM_plus.17610.17610.2   | 2 | 9.34 | 0.920E+04 M148m | (K)ITFAPEI(K)T F I A I P E E I S A M V L T K(M)      | 178.93 | 776.8996 | 1536.798 | 15.941   | -0.5  | 4.53 | 72445.7  | 5.07  | HUMAN | PL1021 | 78 kDa glucose-regulated protein                              |
| 11680 | dirMS_041712_NAR_30mM_plus.17462.17462.2   | 2 | 9.34 | 0.920E+04       | (K)VFQRL(K)K/V/F/Q/I/L N V A(K)                      | 144.02 | 483.7736 | 966.541  | -0.0008  | -0.8  | 6.72 | 17656.4  | 11.01 | HUMAN | C9N055 | 60S ribosomal protein L24                                     |
| 11681 | dirMS_041712_NAR_30mM_plus.7065.7065.2     | 2 | 9.34 | 0.137E+05       | (R)ITTTGSY(R)T T I T/G/S Y A N R(V)                  | 102.7  | 542.724  | 1083.543 | -0.0022  | -2    | 8.41 | 10799.8  | 5.07  | HUMAN | I3L3X7 | Proteasome subunit beta-6 (Fragment)                          |
| 11682 | dirMS_041712_NAR_30mM_plus.7130.7130.2     | 2 | 9.34 | 0.135E+05       | (K)JSDSEG(K)S/D/S/D/S/G E K(A)                       | 93.08  | 441.7168 | 882.42   | 0.006    | 5.8   | 4.37 | 76362.2  | 9.53  | HUMAN | P23246 | Splicing factor, proline- and glutamine-rich                  |
| 11683 | dirMS_041712_NAR_30mM_plus.20862.20862.3   | 3 | 9.34 | 0.576E+05       | (R)ILHFMF(R)H F F M P G/F/A/I/P/S L R(G)             | 179.53 | 540.9498 | 1620.835 | -0.0007  | 0.4   | 9.75 | 42230.8  | 4.77  | HUMAN | RG0174 | Putative tubulin beta chain-like protein ENSP0000290377       |
| 11684 | dirMS_041712_NAR_60mM_plus.5174.5174.3     | 3 | 9.34 | 1.355E+05       | (K)MSPSD(K)M/S/S/S/D/O/D/S D T K(R)L                 | 85.33  | 456.5289 | 1367.574 | -0.0022  | -1.6  | 4.23 | 103309.5 | 5.34  | HUMAN | AA0V56 | SABF protein                                                  |
| 11685 | dirMS_041712_NAR_120mM_minus.7580.7580.3   | 3 | 9.33 | 1.152E+05       | (R)YBRYDY(R)Y/S Y E R D/P/E/P/K(S)                   | 95.63  | 428.5347 | 1283.59  | -0.0007  | -0.6  | 4.68 | 68315.4  | 5.30  | HUMAN | Q14677 | Clathrin interactor 1                                         |
| 11686 | dirMS_041712_NAR_20mM_minus.10471.10471.2  | 2 | 9.33 | 0.144E+05       | (R)YVVDVY(R)Y V I V D/V/G/S/E P R(A)                 | 152.93 | 617.3216 | 1233.647 | -0.0115  | -9.3  | 4.47 | 39066    | 6.68  | HUMAN | ABP0V9 | Selenium binding protein 1                                    |
| 11687 | dirMS_041712_NAR_30mM_minus.1365.1365.3    | 3 | 9.33 | 0.232E+05       | (K)ILAFQ(K)K/L/L/F/A/L/A/Q/L/K(S)                    | 127.25 | 482.755  | 918.529  | -0.007   | -4.9  | 4.53 | 69298    | 6.99  | HUMAN | EP0148 | Epiplakin                                                     |
| 11688 | dirMS_041712_NAR_30mM_minus.18979.18979.2  | 2 | 9.33 | 0.578E+05       | (K)ILAFQ(K)K/L/L/F/A/L/A/Q/L/K(S)                    | 158.65 | 480.7964 | 960.588  | -0.0022  | -2.2  | 8.75 | 26616.1  | 5.68  | HUMAN | ABP0V9 | Epiplakin                                                     |
| 11689 | dirMS_041712_NAR_30mM_minus.19386.19386.2  | 2 | 9.33 | 0.236E+05       | (R)JFELEH(R)F/E/I/L/N/A/D/F R(G)                     | 160.92 | 627.3141 | 1253.616 | 0.0048   | 3.9   | 4.14 | 45028.6  | 5.5   | HUMAN | AK87Q2 | Heat shock cognate 71 kDa protein                             |
| 11690 | dirMS_041712_NAR_50mM_minus.14232.14232.3  | 3 | 9.33 | 0.156E+05 M13m  | (R)DLSHD(R)F/L/S/A/D/H E A M S D Y P(Y)K             | 141.13 | 576.9343 | 1712.784 | 16.0047  | 5.7   | 4.22 | 19709.1  | 4.83  | HUMAN | P13693 | Translatiionally-occluded tumor protein                       |
| 11691 | dirMS_041712_NAR_50mM_minus.16221.16221.3  | 3 | 9.33 | 0.140E+05       | (R)ILDQD(K)K/L/S/L/V/L/D/L Q L R(K)                  | 160.3  | 462.2513 | 1318.741 | -0.0024  | -1.8  | 5.73 | 10917.3  | 6.42  | HUMAN | FRY113 | Wipac1                                                        |
| 11692 | dirMS_041712_NAR_60mM_minus.5179.5179.3    | 3 | 9.33 | 0.189E+06       | (K)ITAPDQ(K)M/T/I/T/P/Q/A/Q/E/H/X(K)L                | 84.33  | 489.5763 | 1466.723 | -0.009   | -6.2  | 5.37 | 31075.7  | 5.65  | HUMAN | RG0174 | Triosephosphate isomerase                                     |
| 11693 | dirMS_041712_NAR_30mM_plus.10094.10277.2   | 2 | 9.33 | 0.837E+05       | (K)FVIATST(K)F/I/A/I/T/S/K(I)                        | 107.18 | 433.7497 | 866.498  | -0.0061  | -7    | 8.75 | 25891.4  | 10.67 | HUMAN | FBW181 | 60S ribosomal protein L6 (Fragment)                           |
| 11694 | dirMS_041712_NAR_30mM_plus.19336.19336.2   | 2 | 9.33 | 0.172E+05       | (R)YVVDVY(R)Y V I V D/V/G/S/E P R(A)                 | 158.23 | 428.2563 | 1312.758 | 0.0004   | -3    | 9.41 | 26616.1  | 5.68  | HUMAN | EP9100 | Epiplakin                                                     |
| 11695 | dirMS_041712_NAR_50mM_minus.15318.15318.3  | 3 | 9.33 | 0.158E+07       | (R)DUDHSP(R)I/D/L/H/L/S/P/S/D I V(N)K                | 138.68 | 450.9258 | 1550.763 | 0.0011   | 0.1   | 5.32 | 7304.3   | 9.39  | HUMAN | G3KAN0 | 40S ribosomal protein S20                                     |
| 11696 | dirMS_041712_NAR_50mM_plus.14580.14580.3   | 3 | 9.33 | 1.576E+05       | (R)ISGQVA(R)G/V/A/V/L/A/L/D/V/K(S)                   | 144.37 | 433.2585 | 1243.762 | -0.001   | -0.9  | 8.31 | 278046.1 | 6.01  | HUMAN | PA9317 | Fatty acid synthase                                           |
| 11697 | dirMS_041712_NAR_50mM_plus.15787.15808.3   | 3 | 9.33 | 1.593E+05       | (R)IALASU(R)R/L/A/S/L/Q/D/S/L/K/D/L/K(S)             | 151.3  | 510.6214 | 1529.853 | -0.0037  | -2.4  | 6    | 124367.7 | 5.51  | HUMAN | P18206 | Vinculin                                                      |
| 11698 | dirMS_041712_NAR_50mM_plus.16267.16267.3   | 3 | 9.33 | 1.264E+06       | (K)ILDDFP(K)L/Q/D/F/N/G K E L N U(S)                 | 154.72 | 522.6317 | 1565.832 | -0.0057  | -3.6  | 6.07 | 45508.6  | 5.5   | HUMAN | AK87Q2 | Heat shock cognate 71 kDa protein                             |
| 11699 | dirMS_041712_NAR_50mM_plus.18399.18399.2   | 2 | 9.33 | 0.608E+05       | (R)HIFPLA(R)H I F I P L A T Y V A P I S A E K(A)     | 164.85 | 878.9842 | 1756.393 | -0.0021  | -1.2  | 6.75 | 49012.3  | 4.9   | HUMAN | AMBU10 | Tubulin alpha-4A chain                                        |
| 11700 | dirMS_041712_NAR_50mM_plus.20218.20218.3   | 3 | 9.33 | 1.528E+05       | (R)YVVDVY(R)Y V I V D/V/G/S/E P R(A)                 | 166.37 | 464.2871 | 923.567  | -0.001   | -1.6  | 4.3  | 76701.6  | 6.13  | HUMAN | EP9100 | Epiplakin                                                     |
| 11701 | dirMS_041712_NAR_50mM_plus.20724.20724.3   | 3 | 9.33 | 0.125E+04       | (K)HIDFPG(K)V I D/L/P G G G A A E I P M E H L K(M)   | 177.7  | 585.311  | 1753.931 | -0.0121  | -6.9  | 5.32 | 35398.8  | 7.15  | HUMAN | Q91479 | Fructose-6-phosphate 3-kinase                                 |
| 11702 | dirMS_041712_NAR_50mM_plus.20845.20845.3   | 3 | 9.33 | 1.260E+05       | (R)INQDLN(R)N L/Q/L/N/L/L/T/L/A/K A D R(T)           | 178.65 | 566.0067 | 1696.012 | -0.006   | -3.6  | 8.75 | 144109.9 | 6.01  | HUMAN | J3K8R7 | Clathrin heavy chain 2                                        |
| 11703 | dirMS_041712_NAR_120mM_minus.10866.11034.3 | 3 | 9.32 | 1.340E+06 S65s  | (R)RIGDVEY(R)F I G D Y E P I N T/G/K/L/R(K)          | 113.67 | 654.9729 | 1795.865 | 2033.092 | -20.5 | 6.07 | 27176.8  | 9.3   | HUMAN | Q87130 | Ras-like protein family member 11A                            |
| 11704 | dirMS_041712_NAR_120mM_minus.20218.20218.3 | 3 | 9.32 | 0.152E+05       | (K)YVVDVY(R)Y V I V D/V/G/S/E P R(A)                 | 166.45 | 433.5866 | 1298.747 | -0.0015  | -1.1  | 6.1  | 12848.7  | 6.42  | HUMAN | CJ0455 | Eukaryotic translation initiation factor 5A-2 (Fragment)      |
| 11705 | dirMS_041712_NAR_20mM_minus.11270.11270.2  | 2 | 9.32 | 0.601E+04 M148m | (R)DLDTVY(R)D L/T/D/V/V/L/M/K(I)                     | 160.07 | 507.7443 | 998.486  | 15.995   | 0.1   | 4.21 | 37482.1  | 5.36  | HUMAN | EP9310 | Actin, gamma-enteric smooth muscle                            |
| 11706 | dirMS_041712_NAR_30mM_minus.13624.13624.2  | 2 | 9.32 | 0.217E+05       | (K)ILGGSV(K)G/L/G/S/A/V/V/L/S E G K(P)L(I)           | 187.83 | 670.8912 | 1340.778 | -0.0033  | -2.4  | 6    | 22956    | 8.8   | HUMAN | EPK225 | Cofilin-1                                                     |
| 11707 | dirMS_041712_NAR_30mM_minus.13162.13162.2  | 2 | 9.32 | 0.698E+05       | (R)INVMFA(R)R N V A I N M V G(K)A                    | 124.38 | 490.2513 | 979.503  | -0.0076  | -7.8  | 8.72 | 58506.4  | 8.38  | HUMAN | P14618 | Pyruvate kinase isozymes M1/M2                                |
| 11708 | dirMS_041712_NAR_30mM_plus.7493.7493.2     | 2 | 9.32 | 0.742E+05 M459m | (R)SMVEEG(R)S M V I/E/E/T/G L R(K)                   | 96.38  | 547.7614 | 1078.52  | 15.9958  | 0.8   | 4.53 | 53377.8  | 5.74  | HUMAN | Q15149 | Plectin                                                       |
| 11709 | dirMS_041712_NAR_40mM_minus.12802.12802.3  | 3 | 9.32 | 1.147E+04       | (R)ILDQD(K)K/L/S/L/V/L/D/L Q L R(K)                  | 158.83 | 540.9498 | 1620.835 | -0.001   | -0.6  | 4.38 | 55088.1  | 6.21  | HUMAN | Q91479 | Tumor susceptibility gene 101 protein                         |
| 11710 | dirMS_041712_NAR_50mM_minus.15359.15359.3  | 3 | 9.32 | 1.343E+05       | (R)YVVDVY(R)Y V V D/V/G/S/L/K/D/L G A R(Y)           | 155.1  | 523.9677 | 1569.886 | -0.007   |       |      |          |       |       |        |                                                               |





|       |                                           |   |      |   |                |                                                    |                             |        |          |          |          |       |      |          |       |       |        |                                                               |
|-------|-------------------------------------------|---|------|---|----------------|----------------------------------------------------|-----------------------------|--------|----------|----------|----------|-------|------|----------|-------|-------|--------|---------------------------------------------------------------|
| 11877 | drMS_041712_NAR_30mM_plus2.5506.529.2     | 2 | 9.25 | 0 | 1.51E+05 M67m  | (R)AmNGE(R)A mI/N/E/S/L/G/V(M)Q                    | m.Deslamin                  | 82.97  | 533.2363 | 1049.468 | 15.9973  | 2.2   | 4.37 | 17170.1  | 8.86  | HUMAN | P98179 | Putative RNA-binding protein 3                                |
| 11878 | drMS_041712_NAR_40mM_plus2.7001.7604.2    | 2 | 9.25 | 0 | 1.99E+05       | (K)SGDFG(R)S/G/P/F/D/R/Y(R)                        | m.Deslamin                  | 104.2  | 437.1906 | 873.374  | 0.0002   | 0.2   | 4.37 | 22761.5  | 9.91  | HUMAN | C93607 | Creatine kinase U-type, mitochondrial (Fragment)              |
| 11879 | drMS_041712_NAR_50mM_plus2.6295.16259.3   | 1 | 9.25 | 1 | 2.76E+05       | (K)YVAEY(R)K V/AI/V/L/P/L/F/D/R/R(E)               | m.Deslamin                  | 5.24   | 501.1511 | 2114.809 | -0.0007  | -0.1  | 8.49 | 2057.9   | 8.49  | HUMAN | P15127 | Nucleosome assembly protein 1-like 1                          |
| 11880 | drMS_041712_NAR_50mM_plus2.2110.2120.3    | 3 | 9.25 | 0 | 3.08E+05       | (K)HSDFG(K)S F(V)G(V)P(L)F V E I(K)E               | m.Deslamin                  | 180.18 | 593.6536 | 1778.948 | -0.0018  | -0.8  | 6.75 | 20151.2  | 4.48  | HUMAN | G3328  | Heat shock protein HSP 90-alpha (Fragment)                    |
| 11881 | drMS_041712_NAR_60mM_plus1.0515.10151.3   | 3 | 9.25 | 1 | 5.27E+05       | (R)RQDQ(R)R Q(Q)E L(Q)I/V(L)E(K)F                  | m.Deslamin                  | 111.23 | 499.2786 | 1495.823 | -0.0015  | -1.0  | 6.14 | 276046.1 | 6.01  | HUMAN | A9327  | Fatty acid synthase                                           |
| 11882 | drMS_041712_NAR_120mM_minus1.7445.17445.4 | 4 | 9.24 | 1 | 5.36E+05       | (R)GFGHG(R)F/G/H/G I(A)W/P V(V)S/A C K(R)F         | C.Carboxymethyl             | 150.38 | 487.502  | 1946.991 | -0.0044  | -2.2  | 8.6  | 21005.6  | 5.12  | HUMAN | Q04760 | Lactoylglutathione lyase                                      |
| 11883 | drMS_041712_NAR_30mM_plus1.0326.10326.5   | 2 | 9.24 | 0 | 5.56E+05       | (R)LTAEQD(R)Y/A/G/E/L/S/L/V(L)K(D)                 | m.Deslamin                  | 153.52 | 582.7922 | 2123.839 | -0.024   | -10.7 | 4.14 | 53397.9  | 5.74  | HUMAN | C93149 | Plectin                                                       |
| 11884 | drMS_041712_NAR_50mM_plus2.1272.1272.2    | 3 | 9.24 | 0 | 2.82E+05       | (K)EGKPT(K)E G K P T(V)E/D/L/Q/E/L/F/K(E)          | m.Deslamin                  | 104.88 | 615.9772 | 1845.512 | 0.0054   | 2.9   | 4.08 | 29841.1  | 9.04  | HUMAN | Q75937 | Dnal homolog subfamily C member 8                             |
| 11885 | drMS_041712_NAR_50mM_plus2.7966.7966.3    | 3 | 9.24 | 0 | 4.50E+04       | (K)SLTEG(K)S/L/T/G(L)A/H/S G P V S(K)G             | m.Deslamin                  | 112.42 | 542.2789 | 1624.829 | -0.0068  | -4.2  | 6.75 | 119092.8 | 6.09  | HUMAN | D6R046 | LIM and calponin homolog domain-containing protein 1          |
| 11886 | drMS_041712_NAR_60mM_minus.10673.10673.3  | 3 | 9.24 | 1 | 5.44E+05 M23m  | (R)MSMKE(R)M/S M E V D(E)G(L)M/LN V Q(N)K(N)       | m.Deslamin                  | 119.9  | 647.3011 | 1923.897 | 15.9915  | -1.8  | 4.68 | 40069.4  | 4.83  | HUMAN | E7EWR1 | Tubulin beta chain                                            |
| 11887 | drMS_041712_NAR_60mM_plus1.5703.15703.3   | 3 | 9.24 | 1 | 3.03E+05       | (K)GFPTTH(R)F P/T T(Y)S/P A N(K)K(L)               | m.Deslamin                  | 147.2  | 490.9272 | 1469.779 | -0.0017  | -1.1  | 9.7  | 55361.8  | 6.42  | HUMAN | G5E452 | Protein disulfide isomerase family A, member 3, isoform CRA_b |
| 11888 | drMS_041712_NAR_60mM_plus1.9006.19006.3   | 3 | 9.24 | 0 | 5.08E+05       | (R)GRLPRL(R)G T H(P)A/L/S/A R(L)G(V)K              | m.Deslamin                  | 148.67 | 514.9575 | 1544.843 | -0.0039  | -2.4  | 6.75 | 13772.9  | 5.74  | HUMAN | C15149 | Bixin                                                         |
| 11889 | drMS_041712_NAR_120mM_plus.18717.18717.4  | 4 | 9.24 | 0 | 4.38E+04       | (R)ILGWDP(R)I/G/W D/P K P G H(L)D/L A(L)R(G)       | m.Deslamin                  | 159.88 | 469.253  | 1873.992 | -0.0017  | -0.9  | 5.38 | 95141.7  | 5.22  | HUMAN | B72463 | Purromycin-sensitive aminopeptidase                           |
| 11890 | drMS_041712_NAR_120mM_plus.4177.4177.3    | 3 | 9.24 | 1 | 1.73E+07 M310m | (R)JTKTESE(R)T K T E Y I(S)E/m R(K)D               | m.Deslamin                  | 69.83  | 408.8687 | 1208.594 | 15.9976  | 2.2   | 5.81 | 37296.3  | 5.33  | HUMAN | BV8U64 | Keratin, type II cytoskeletal 8                               |
| 11891 | drMS_041712_NAR_120mM_plus.5230.5230.3    | 3 | 9.24 | 1 | 4.31E+05       | (R)YREYK(R)Y/R E R Q I(V)A/R(Q)K                   | m.Deslamin                  | 81.37  | 410.5196 | 1229.555 | -0.0103  | -8.4  | 4.68 | 37433.2  | 9.17  | HUMAN | IK0L41 | Protein RRM14-RBM4                                            |
| 11892 | drMS_041712_NAR_120mM_plus.7643.7643.3    | 3 | 9.24 | 1 | 2.02E+05 M281m | (R)ISMAE(R)S R A E A/S M/V(Q)K/V(L)K               | m.Deslamin                  | 93.02  | 476.2657 | 1411.684 | 15.9947  | -0.1  | 5.86 | 37296.3  | 5.33  | HUMAN | BV1864 | Keratin, type II cytoskeletal 8                               |
| 11893 | drMS_041712_NAR_20mM_plus.11273.11273.3   | 3 | 9.24 | 0 | 1.08E+05       | (K)GCTHTG(R)C G(T) G(G) G D/T A/T C C(A)W(K)       | m.Deslamin                  | 150.18 | 585.5999 | 1754.787 | -0.0019  | -1.1  | 5.84 | 41827.5  | 7     | HUMAN | B727A9 | Phosphoglycerate kinase                                       |
| 11894 | drMS_041712_NAR_20mM_plus.17745.17745.3   | 3 | 9.24 | 0 | 1.12E+04       | (R)NTEPTA(R)I(N)E P T A A(A)A(V)G/L D(R)T          | m.Deslamin                  | 193.42 | 563.3055 | 1687.901 | 0.0006   | 0.3   | 4.37 | 25598.3  | 6.45  | HUMAN | E7E711 | Heat shock 70 kDa protein 1A/1B                               |
| 11895 | drMS_041712_NAR_20mM_plus.7443.7443.2     | 2 | 9.24 | 0 | 7.99E+04       | (R)IGTFED(R)R T S F D A I(A)T S V G S/A S E K(A)   | m.Deslamin                  | 119.65 | 815.8661 | 1630.719 | 0.0058   | 3.6   | 4.37 | 24273.5  | 8.98  | HUMAN | HOY49  | Electron transfer flavoprotein subunit alpha, mitochondrial   |
| 11896 | drMS_041712_NAR_20mM_plus.9247.9247.2     | 2 | 9.24 | 0 | 4.55E+04       | (R)IYGGSR(R)Y I(V)G/G/S Y T G E A T C(K)E          | m.Deslamin                  | 135.4  | 663.8412 | 1326.672 | 0.0029   | 2.2   | 8.59 | 31675.7  | 5.65  | HUMAN | PG0174 | Triphosphosphate isomerase                                    |
| 11897 | drMS_041712_NAR_30mM_plus2.10730.1084.2   | 2 | 9.24 | 0 | 7.45E+05       | (R)IHWQ(R)M N I(Q)A/V/S Y I(K)                     | C.Carboxymethyl             | 109.55 | 427.2823 | 943.557  | 0.0002   | 0.2   | 8.8  | 25103.6  | 5.88  | HUMAN | O43633 | Charged multivesicular body protein 2a                        |
| 11898 | drMS_041712_NAR_30mM_plus2.20144.20144.2  | 2 | 9.24 | 0 | 1.22E+04       | (R)JALDTP(R)A L D/T M(N) F D V I(K)G               | m.Deslamin                  | 159.3  | 633.8315 | 1266.64  | 0.0159   | 12.5  | 4.21 | 68197.9  | 9.58  | HUMAN | BIANR0 | Poly(A) binding protein, cytoplasmic 4 (Inducible form)       |
| 11899 | drMS_041712_NAR_50mM_plus2.8297.8297.3    | 3 | 9.24 | 0 | 2.33E+05       | (K)YVQADQ(K)Q I/Q A E L H/T7(S) L G(V)K            | m.Deslamin                  | 111.33 | 479.2607 | 1435.765 | 0.0002   | 1.6   | 6.72 | 267260.7 | 9.95  | HUMAN | Q13085 | Acetyl-CoA carboxylase 1                                      |
| 11900 | drMS_041712_NAR_50mM_plus2.8558.8558.3    | 3 | 9.24 | 1 | 2.10E+04       | (R)JIDSSG(R)A M/D/S/N L K D D V S T A Q D(R)K      | m.Deslamin                  | 111.82 | 595.2868 | 1783.846 | 0.0002   | 0.1   | 4.43 | 46656.7  | 5.19  | HUMAN | Q5V37F | PC domain-containing protein 2                                |
| 11901 | drMS_041712_NAR_60mM_plus.19234.19234.3   | 3 | 9.24 | 1 | 1.75E+05       | (R)IYGGSR(R)A G I/Q A E L H/T7(S) L G(V)K          | m.Deslamin                  | 158.92 | 533.9525 | 1659.837 | 0.0059   | 3.6   | 4.49 | 54918.3  | 6.61  | HUMAN | Q89764 | Coronin-1B                                                    |
| 11902 | drMS_041712_NAR_60mM_plus.6517.6517.2     | 2 | 9.24 | 0 | 1.48E+05       | (K)TVFAE(K)T V I(E)A/E A H V G T V T R(H)          | m.Deslamin                  | 92.68  | 617.3399 | 1341.676 | -0.0032  | -2.4  | 5.37 | 46943.7  | 6.54  | HUMAN | O75874 | Isocitrate dehydrogenase [NADP] cytoplasmic                   |
| 11903 | drMS_041712_NAR_120mM_minus.20506.20506.3 | 3 | 9.23 | 1 | 1.51E+05       | (R)IYGGSR(R) L F/N/D D/K G L I R(Q)                | m.Deslamin                  | 169.07 | 451.9371 | 1359.8   | -0.0027  | -2    | 5.96 | 18498.6  | 5.82  | HUMAN | H7C374 | Peroxisome 4 (Fragment)                                       |
| 11904 | drMS_041712_NAR_20mM_minus.8223.8223.2    | 2 | 9.23 | 0 | 5.74E+05       | (K)IDVANE(K)Q I(V)A/V/S A F V E I(R)K              | m.Deslamin                  | 131.7  | 616.3098 | 1235.602 | -0.0108  | 8.8   | 4.37 | 85057.6  | 4.94  | HUMAN | PO7900 | Heat shock protein HSP 90-alpha                               |
| 11905 | drMS_041712_NAR_30mM_plus.12417.12417.2   | 2 | 9.23 | 0 | 1.54E+05       | (R)IYGGSR(R)A G I/Q A E L H/T7(S) L G(V)K          | m.Deslamin                  | 421.76 | 944.523  | 1943.977 | -0.0026  | -9.7  | 9.75 | 12417.2  | 6.45  | HUMAN | Q13085 | Carbonyl reductase [NADPH]                                    |
| 11906 | drMS_041712_NAR_40mM_plus2.14656.14859.3  | 3 | 9.23 | 0 | 1.19E+06       | (K)ISSYQD(K)S I/S I/S Q/S V/P I A E I(N)A H R(K)   | m.Deslamin                  | 172.1  | 640.368  | 1919.071 | 0        | 0     | 6.75 | 61224.7  | 5.7   | HUMAN | PI0809 | 60 kDa heat shock protein, mitochondrial                      |
| 11907 | drMS_041712_NAR_40mM_minus.8090.8090.3    | 3 | 9.23 | 0 | 1.24E+05 M147m | (K)IQmEAF(K)Q I/m E A P H V(V)Q(T) P G I(R)        | m.Deslamin                  | 127.3  | 545.627  | 1618.703 | 15.9931  | -1.1  | 6.75 | 20859.5  | 4.85  | HUMAN | JK325  | Eukaryotic initiation factor 4A (Fragment)                    |
| 11908 | drMS_041712_NAR_40mM_plus2.9506.9506.3    | 3 | 9.23 | 0 | 2.43E+03 M53m  | (K)ISGTGA(K)S G T/G I/A M S V M R P E I m I(K)S    | m.Deslamin                  | 137.67 | 641.6582 | 1906.955 | 16.0053  | 5.4   | 8.46 | 8797.3   | 9.3   | HUMAN | H38B00 | V-type proton ATPase 16 kDa proteolipid subunit               |
| 11909 | drMS_041712_NAR_50mM_plus2.15180.15180.3  | 3 | 9.23 | 0 | 1.51E+05 M181m | (R)IYGGSR(R)A G I/Q A E L H/T7(S) L G(V)K          | C.Carboxymethyl             | 155.22 | 651.6247 | 1923.897 | -0.0019  | -2.5  | 8.64 | 42680.1  | 6.61  | HUMAN | PI0565 | Pyruvate kinase (Fragment)                                    |
| 11910 | drMS_041712_NAR_60mM_minus.10008.10008.3  | 3 | 9.23 | 1 | 3.17E+05       | (K)ILSTDD(K)I/L T S D/D V D E I Y I(K)K            | C.Carboxymethyl             | 115.37 | 480.2484 | 1438.742 | -0.0118  | -8.2  | 4.56 | 12573.5  | 10.39 | HUMAN | EP9550 | 45S ribosomal protein S13 (Fragment)                          |
| 11911 | drMS_041712_NAR_60mM_minus.10585.10585.3  | 3 | 9.23 | 0 | 2.08E+05       | (R)IJSNAL(R)S/N/L/N(L) V/K P E(K)T                 | m.Deslamin                  | 118.6  | 404.5829 | 1211.736 | -0.0017  | -1.4  | 8.59 | 15111    | 6.44  | HUMAN | B4DE64 | Programmed cell death protein 5                               |
| 11912 | drMS_041712_NAR_60mM_minus.17221.17221.3  | 3 | 9.23 | 0 | 9.52E+04 S93s  | (R)IALVWR(R)I L M V W S A I(S) A S A S R(R)        | m.Acetylglucosaminidase (S) | 156.02 | 597.6347 | 1587.787 | 203.1022 | 12.7  | 9.8  | 66338.4  | 9.55  | HUMAN | Q9U818 | Interferon-related IFI202 (PC4-B) protein                     |
| 11913 | drMS_041712_NAR_120mM_plus.18165.18165.3  | 3 | 9.23 | 1 | 3.37E+05       | (R)IAREE(R)R I A R F E I(L)N I A D P R I(S)        | m.Deslamin                  | 147.97 | 494.2571 | 1480.754 | 0.0024   | 1.7   | 4.68 | 45508.6  | 5.5   | HUMAN | AKB702 | Heat shock cognate 71 kDa protein                             |
| 11914 | drMS_041712_NAR_20mM_plus.12142.12142.2   | 2 | 9.23 | 0 | 3.44E+04       | (K)IQAESK(R)K Q I A E L H/T7(S) L G(V)K            | m.Deslamin                  | 156.63 | 715.8475 | 1438.669 | -0.0118  | -8.2  | 4.56 | 52089.9  | 5.5   | HUMAN | Q02780 | Peptidyl-prolyl cis-trans isomerase FKBP1                     |
| 11915 | drMS_041712_NAR_20mM_plus.12590.12590.2   | 2 | 9.23 | 0 | 1.34E+05       | (R)IGVEICK(R)G V/E/L(C)I/N/T P R(L)                | C.Carboxymethyl             | 159.12 | 586.8004 | 1712.609 | 0.0003   | 0.3   | 6    | 61018.6  | 9.44  | HUMAN | B4DLW8 | Probable ATP-dependent RNA helicase DDX5                      |
| 11916 | drMS_041712_NAR_20mM_plus.13985.13985.2   | 2 | 9.23 | 0 | 6.90E+04       | (K)IYEEVLE(K)E I/V/E E/L R(K)                      | m.Deslamin                  | 168.03 | 565.3124 | 1129.611 | 0.0002   | 8.1   | 4.09 | 334221.3 | 6.44  | HUMAN | P15924 | Desmoplakin                                                   |
| 11917 | drMS_041712_NAR_20mM_plus.15419.15419.2   | 2 | 9.23 | 0 | 3.88E+04 M73m  | (R)IALVWR(R)I L M V W S A I(S) A S A S R(R)        | m.Deslamin                  | 178.07 | 616.4181 | 1615.836 | 15.9929  | -1.2  | 4.03 | 27549.9  | 4.39  | HUMAN | EP9014 | Tubulin beta chain                                            |
| 11918 | drMS_041712_NAR_20mM_plus.15582.15582.2   | 2 | 9.23 | 0 | 2.80E+05       | (R)ITTEVLE(R)I T E I R H N I V L I(K)D             | m.Deslamin                  | 177.97 | 507.618  | 1781.929 | -0.0011  | -1.7  | 4.64 | 32711.2  | 4.17  | HUMAN | Q13085 | Ubiquitin                                                     |
| 11919 | drMS_041712_NAR_20mM_plus.18558.18558.2   | 2 | 9.23 | 0 | 7.52E+04       | (K)ISLNTU(K)S I T/L M T L T(K)E                    | m.Deslamin                  | 199.03 | 518.8058 | 1036.604 | 0.0006   | 0.6   | 8.47 | 18010.4  | 9.42  | HUMAN | E7E711 | Heat shock 70 kDa protein 1A/1B                               |
| 11920 | drMS_041712_NAR_20mM_plus.18956.18956.3   | 3 | 9.23 | 0 | 7.06E+04       | (R)IYNLTA(R)R L Y T A L G/L N/L V I/S G G T A T(K) | m.Deslamin                  | 201.58 | 533.9719 | 1599.906 | -0.0053  | -3.3  | 8.75 | 65036    | 6.27  | HUMAN | EP9B03 | Phosphoribosylaminoimidazolecarboxamide formyltransferase     |
| 11921 | drMS_041712_NAR_20mM_plus.7417.7417.2     | 2 | 9.23 | 0 | 2.44E+05       | (R)ITVGGV(R)T V I G I V N Q D P(K)K                | m.Deslamin                  | 119.85 | 506.7922 | 1012.579 | -0.0014  | -1.4  | 8.41 | 61363    | 8.73  | HUMAN | C9J059 | Propionyl-CoA carboxylase beta chain, mitochondrial           |
| 11922 | drMS_041712_NAR_20mM_plus.8110.8110.2     | 2 | 9.23 | 0 | 2.80E+05       | (K)YTEDTS(K)Y T/D E I T S V S V(K)K                | m.Deslamin                  | 126.02 | 553.7889 | 1106.569 | 0.0017   | 1.6   | 4.37 | 80855.1  | 7.33  | HUMAN | PI0565 | Propionyl-CoA carboxylase alpha chain, mitochondrial          |
| 11923 | drMS_041712_NAR_20mM_plus.9365.9365.2     | 2 | 9.23 | 0 | 8.16E+04       | (K)IQAESK(R)K Q I A E L H/T7(S) L G(V)K            | m.Deslamin                  | 136.32 | 691.3246 | 1381.648 | -0.0062  | -4.5  | 4.09 | 50054.3  | 5.14  | HUMAN | PI3645 | Keratin, type I cytoskeletal 10                               |
| 11924 | drMS_041712_NAR_30mM_plus2.14435.14435.2  | 2 | 9.23 | 0 | 2.56E+05       | (R)IILIAEG(R)I/I/L A E I R(K)                      | m.Deslamin                  | 129.25 | 442.7821 | 884.556  | 0.0005   | 0.6   | 6    | 45228.3  | 6.03  |       |        |                                                               |



|       |                                           |   |      |                 |                                                      |        |          |          |         |       |      |          |       |       |        |                                                                              |
|-------|-------------------------------------------|---|------|-----------------|------------------------------------------------------|--------|----------|----------|---------|-------|------|----------|-------|-------|--------|------------------------------------------------------------------------------|
| 12095 | dirMS_041712_NAR_60mM_plus.13689.13689.3  | 3 | 9.15 | 1.596E+05       | (R)FKFGKSP(R)K I P G S P P E S/A/R/R                 | 12843  | 468.2401 | 1402.715 | -0.009  | -6.4  | 8.75 | 51636.5  | 8.68  | HUMAN | F7EU23 | Rab GDP dissociation inhibitor beta                                          |
| 12096 | dirMS_041712_NAR_60mM_plus.15583.15601.3  | 3 | 9.15 | 1.578E+05       | (K)HGTGYS(R)K G V E (L)W(D)E/N/P N R V               | 13817  | 518.6115 | 1553.828 | -0.002  | -5.3  | 4.68 | 20629.7  | 8.84  | HUMAN | Q13442 | 28 kDa heat- and acid-stable phosphoprotein                                  |
| 12097 | dirMS_041712_NAR_120mM_plus.12098.103.0.3 | 0 | 9.14 | 5.956E+05       | (R)HSGSAL(R)WV G E S S L P D A V E K(A)              | 1054   | 498.2048 | 1311.921 | 0.012   | 9.1   | 5.94 | 1311.921 | 5.55  | HUMAN | P18659 | Phosphoglycerate mutase 1                                                    |
| 12098 | dirMS_041712_NAR_120mM_plus.8833.8833.3   | 3 | 9.14 | 0.872E+05       | (K)HGFVGS(K)H T N S P N S D P G V P K R L L          | 10307  | 562.2599 | 1864.767 | -0.002  | -1.3  | 5.21 | 18511.8  | 5.62  | HUMAN | D6D970 | Heterogeneous nuclear ribonucleoprotein H (Fragment)                         |
| 12099 | dirMS_041712_NAR_30mM_minus.9700.9700.2   | 2 | 9.14 | 0.157E+05       | (K)LSLESE(K)LSVLELIP G T G(D)/R F                    | 14778  | 643.8138 | 1286.659 | -0.003  | -1.8  | 4.14 | 26616.1  | 5.68  | HUMAN | E9PPUJ | Epiplakin                                                                    |
| 12100 | dirMS_041712_NAR_30mM_minus.10091.10091.2 | 2 | 9.14 | 0.670E+05       | (R)WVSSC(R)WVW(S)S/A/R/R                             | 10905  | 454.2271 | 907.445  | 0.015   | -1.6  | 9.75 | 276046.1 | 6.01  | HUMAN | P49327 | Fatty acid synthase                                                          |
| 12101 | dirMS_041712_NAR_30mM_minus.11797.11864.2 | 0 | 9.14 | 2.390E+05       | (R)APFDR(R)R F I F G P L A K R A                     | 4122   | 498.2048 | 1311.921 | 0.012   | 9.1   | 5.94 | 1311.921 | 5.55  | HUMAN | Q13442 | 28 kDa heat- and acid-stable phosphoprotein                                  |
| 12102 | dirMS_041712_NAR_30mM_minus.14593.14593.2 | 2 | 9.14 | 0.189E+05       | (K)EYFGLAEE F I P G L V A V N(I)                     | 13488  | 445.2546 | 917.509  | -0.007  | -7.8  | 6.1  | 41063.3  | 5.58  | HUMAN | Q85UVO | TNDC5 protein                                                                |
| 12103 | dirMS_041712_NAR_30mM_minus.7082.7082.2   | 2 | 9.14 | 0.280E+05       | (R)AYSSVA(R)A(S)V(S)S A R(L)                         | 9303   | 427.7216 | 854.437  | -0.007  | -0.9  | 8.79 | 59288.4  | 7.16  | HUMAN | Q3LXA3 | Bifunctional ATP-dependent dihydroxyacetone kinase/FAD-AMP lyase (cyclizing) |
| 12104 | dirMS_041712_NAR_50mM_minus.16336.16336.3 | 3 | 9.14 | 0.175E+05 M1m   | (-I)MPLVW(I)K A I V/A/Q/N C K Y(K)                   | 16127  | 529.3077 | 1569.919 | -15.99  | -3.1  | 10   | 2450.2   | 5.44  | HUMAN | P30085 | UMP-CMP kinase                                                               |
| 12105 | dirMS_041712_NAR_50mM_plus.9205.9205.3    | 3 | 9.14 | 0.148E+05       | (R)YTVYLA(R)T V Y V A L A D G G G P N T E R G        | 12008  | 571.9667 | 1714.888 | -0.023  | -1.3  | 5.63 | 107550.2 | 5.34  | HUMAN | P49588 | Alanine--tRNA ligase, cytoplasmic                                            |
| 12106 | dirMS_041712_NAR_60mM_plus.14705.14705.3  | 3 | 9.14 | 0.248E+05       | (K)YVYVDA(K)Y V I L T G D V L P G R R                | 14182  | 474.5813 | 1418.744 | -0.017  | -9    | 6.74 | 50811.6  | 9.32  | HUMAN | Q13442 | 28 kDa heat- and acid-stable phosphoprotein                                  |
| 12107 | dirMS_041712_NAR_60mM_minus.14997.14997.3 | 3 | 9.14 | 1.505E+04       | (K)KAPDFV(K)K A P D I V F V I P A P R(L)             | 14368  | 437.5685 | 1310.689 | 0.018   | -1.3  | 8.59 | 71218.8  | 6.3   | HUMAN | A7Y18  | Radixin                                                                      |
| 12108 | dirMS_041712_NAR_60mM_minus.17452.17452.3 | 3 | 9.14 | 1.225E+05       | (K)GPREEN(K)G P R E E I V Y L P I C Y(R)N            | 15773  | 588.9733 | 1764.91  | -0.048  | -2.7  | 6.14 | 39066    | 6.61  | HUMAN | AP6VW9 | Selenium binding protein 1 (Fragment)                                        |
| 12109 | dirMS_041712_NAR_120mM_plus.7673.7673.2   | 2 | 9.14 | 0.835E+05       | (K)HFEALAK(H)E I L A N R(R)                          | 9448   | 479.2487 | 957.49   | 0       | 0     | 6.75 | 63633.4  | 7.9   | HUMAN | B3K012 | Protein transport protein Sec23A                                             |
| 12110 | dirMS_041712_NAR_20mM_plus.17080.17080.2  | 2 | 9.14 | 0.848E+05       | (K)YNNP(K)W(N)V P P I A K(A)                         | 18925  | 498.2048 | 1311.921 | -0.001  | -1    | 8.72 | 51212    | 5.54  | HUMAN | ANFQD9 | Sartin B                                                                     |
| 12111 | dirMS_041712_NAR_120mM_plus.17843.17843.2 | 2 | 9.14 | 0.916E+04       | (K)VPDQPG(K)W D V P P Q D Q L T A V L T R G(R)       | 19483  | 780.9029 | 1560.802 | -0.031  | -2    | 4.21 | 31330.8  | 9.26  | HUMAN | E9P082 | Malate dehydrogenase, mitochondrial                                          |
| 12112 | dirMS_041712_NAR_20mM_plus.7204.7204.2    | 2 | 9.14 | 0.454E+03       | (R)JTESEV(R)T J E I S E V V E R(S)                   | 116.9  | 574.792  | 1148.579 | -0.026  | -2.3  | 4.25 | 74423.5  | 6.57  | HUMAN | P02545 | Prelamin-A/C                                                                 |
| 12113 | dirMS_041712_NAR_20mM_plus.7694.7694.2    | 2 | 9.14 | 0.157E+05       | (K)QVAAQ(K)A I V/A/Q/N C K Y(K)                      | 12243  | 569.2902 | 1137.572 | 0.001   | -0.9  | 8.59 | 31075.7  | 5.65  | HUMAN | P60174 | Triosephosphate isomerase                                                    |
| 12114 | dirMS_041712_NAR_20mM_plus.8713.8713.2    | 2 | 9.14 | 0.238E+05       | (R)HSGSAL(R)WV G E S S L P D A V E K(A)              | 1054   | 498.2048 | 1311.921 | 0.012   | 9.1   | 5.94 | 1311.921 | 5.55  | HUMAN | Q13442 | 28 kDa heat- and acid-stable phosphoprotein                                  |
| 12115 | dirMS_041712_NAR_30mM_plus.18439.18439.2  | 2 | 9.14 | 0.353E+05       | (R)SVEEER(S)Q V E E F L S V R(Y)                     | 14963  | 661.8302 | 1322.659 | -0.055  | -4.2  | 4.25 | 53377.8  | 5.74  | HUMAN | Q15149 | Plectin                                                                      |
| 12116 | dirMS_041712_NAR_30mM_plus.9817.9899.2    | 2 | 9.14 | 0.654E+05       | (R)EEEMM(R)E(E)M(N)M/R(K)                            | 10533  | 469.2135 | 937.412  | 0.008   | 8.5   | 4.25 | 26419.2  | 5.1   | HUMAN | HOY9K7 | Splicing factor, proline- and glutamine-rich (Fragment)                      |
| 12117 | dirMS_041712_NAR_40mM_plus.19409.19409.3  | 3 | 9.14 | 1.146E+05       | (R)TEJLSG(R)T E G L I S V L S Q G A V A V I K E(K)   | 18177  | 607.0003 | 1803.988 | -0.005  | -0.8  | 5.81 | 31604.9  | 6.88  | HUMAN | G34V05 | Eukaryotic translation initiation factor 2 subunit 1 (Fragment)              |
| 12118 | dirMS_041712_NAR_50mM_plus.10966.10966.3  | 3 | 9.14 | 0.638E+04       | (K)MVMG(K)M V W I Q D V Q P N T G A D R P L R(I)     | 125.3  | 657.663  | 1709.979 | -0.042  | -2.1  | 5.71 | 70034.8  | 6.89  | HUMAN | BAD371 | Far upstream element-binding protein 1                                       |
| 12119 | dirMS_041712_NAR_50mM_plus.14770.14770.3  | 3 | 9.14 | 1.158E+04       | (K)KQVW(K)K R C V N L P G A V A I D I P A V S E K(K) | 14508  | 588.999  | 1764.985 | -0.001  | -1.7  | 6.07 | 30947.9  | 6.47  | HUMAN | HSB304 | Pyruvate kinase                                                              |
| 12120 | dirMS_041712_NAR_60mM_plus.10411.10411.3  | 3 | 9.14 | 1.161E+06       | (R)ITNAENE(R)T N J A E E F V T T K Y(D)              | 11227  | 465.2512 | 1393.732 | 0.069   | -4.9  | 5.81 | 66208.7  | 6.32  | HUMAN | P04264 | Keratin, type II cytoskeletal 1                                              |
| 12121 | dirMS_041712_NAR_60mM_plus.15024.15024.3  | 3 | 9.14 | 1.421E+05       | (K)SLEELR(K)S L E /E L R L E D /Q A N R(K)           | 13557  | 579.2911 | 1735.861 | -0.022  | -1.3  | 4.41 | 178367.2 | 8.03  | HUMAN | J8K2P9 | Nuclear pore complex protein Nup89-Nup66                                     |
| 12122 | dirMS_041712_NAR_60mM_plus.16169.16288.3  | 3 | 9.14 | 0.488E+05       | (K)TITMATA(K)T I T W A H A L L A A R(E)              | 14172  | 473.5839 | 1298.725 | 0.022   | 9.4   | 9.44 | 37589.6  | 5.94  | HUMAN | Q5210  | Protein FAM88B                                                               |
| 12123 | dirMS_041712_NAR_60mM_plus.19475.19475.3  | 3 | 9.14 | 0.605E+05       | (R)SVEEER(S)Q V E E F L S V R(Y)                     | 14963  | 661.8302 | 1322.659 | -0.055  | -4.2  | 4.25 | 53377.8  | 5.74  | HUMAN | P02545 | Prelamin-A/C                                                                 |
| 12124 | dirMS_041712_NAR_60mM_plus.8288.8288.3    | 3 | 9.14 | 1.511E+05       | (R)ISDQV(R)S L Q S /G V E E T T E N R R(L)           | 10157  | 548.9468 | 1644.83  | -0.014  | -2.5  | 4.79 | 36636.9  | 7.86  | HUMAN | AM0925 | Fructose-bisphosphate aldolase                                               |
| 12125 | dirMS_041712_NAR_120mM_plus.14697.14697.4 | 4 | 9.13 | 2.307E+05       | (K)MAGDA(K)M A G I G D E /E D G E R L P L A V K(D)   | 134.3  | 479.0049 | 1933.016 | -0.183  | -9.6  | 4.78 | 99900.1  | 5.04  | HUMAN | BAD228 | Coatomer protein complex, subunit beta 2 (Beta prime), isoform CRA_b         |
| 12126 | dirMS_041712_NAR_20mM_plus.12076.12076.2  | 2 | 9.13 | 0.851E+05 M331m | (R)TVTQSA(R)T V I Q S L E I I D /D L S M R(N)        | 170.4  | 671.8733 | 1506.747 | -15.925 | -1.6  | 4.03 | 43773.3  | 5.26  | HUMAN | F8V2V9 | Keratin, type I cytoskeletal 18                                              |
| 12127 | dirMS_041712_NAR_20mM_plus.1935.9223.2    | 2 | 9.13 | 0.192E+05 M239m | (K)YVYVDA(K)Y V I L T G D V L P G R R                | 14182  | 474.5813 | 1418.744 | -0.017  | -5.1  | 6.1  | 52817.6  | 6.32  | HUMAN | ANFQD9 | Sartin B                                                                     |
| 12128 | dirMS_041712_NAR_30mM_plus.14373.14373.2  | 2 | 9.13 | 0.219E+05       | (R)HYTFEG(R)T Y T F E G I K(Y)                       | 13228  | 460.2363 | 915.455  | 0.093   | -10.1 | 6.0  | 23092.1  | 6.93  | HUMAN | G3V438 | Activator of 90 kDa heat shock protein ATPase homolog 1 (Fragment)           |
| 12129 | dirMS_041712_NAR_30mM_plus.19084.19084.2  | 2 | 9.13 | 0.124E+04       | (R)FEELTN(R)F E L N /T N R(Y)                        | 15837  | 567.804  | 1134.615 | -0.146  | -12.9 | 4.53 | 106155.7 | 5.45  | HUMAN | BSM519 | Eukaryotic translation initiation factor 3 subunit C                         |
| 12130 | dirMS_041712_NAR_30mM_minus.19498.19498.2 | 2 | 9.13 | 0.370E+05       | (R)IASLSL(R)A S /A S L W /Q A I M E K(G)             | 162.5  | 632.3234 | 1263.64  | -0.007  | -0.5  | 6.05 | 26616.1  | 5.68  | HUMAN | E9PPUJ | Epiplakin                                                                    |
| 12131 | dirMS_041712_NAR_30mM_plus.10963.10963.3  | 3 | 9.13 | 0.181E+05       | (R)DHSQHG(R)D L S H I G D A V V I P S C A K(R)       | 1474   | 528.9384 | 1584.805 | -0.044  | -2.8  | 5.21 | 29110.6  | 4.57  | HUMAN | P12004 | Proliferating cell nuclear antigen                                           |
| 12132 | dirMS_041712_NAR_40mM_plus.14525.14525.3  | 3 | 9.13 | 1.199E+05       | (R)IGLGLR(R)S L I P G L L P M A P A D L T P K(G)     | 16947  | 507.6813 | 1701.031 | -0.016  | -0.9  | 8.59 | 153849.9 | 6.55  | HUMAN | Q9P279 | Enhancer of mRNA-decapping protein 4                                         |
| 12133 | dirMS_041712_NAR_50mM_plus.12575.12575.3  | 3 | 9.13 | 1.130E+05       | (R)ISLANIA(R)S L A /W A L A A N C Y K Y(K)           | 13983  | 512.9454 | 1536.82  | 0.014   | 0.9   | 9.7  | 36978.6  | 6.33  | HUMAN | B72800 | Adenosine kinase                                                             |
| 12134 | dirMS_041712_NAR_50mM_plus.12782.12782.3  | 3 | 9.13 | 1.377E+05       | (K)INTVELL(K)M T V E L /L V E D K E N G V V R C(R)   | 140.5  | 626.3309 | 1876.976 | 0.018   | 1     | 4.68 | 258215.9 | 5.84  | HUMAN | F7EN95 | Filamin-B                                                                    |
| 12135 | dirMS_041712_NAR_50mM_plus.14359.14359.3  | 3 | 9.13 | 0.618E+04       | (K)ALMLLCC(K)A L L L D Q Q G A S P H A A A N(K)      | 150.53 | 558.9883 | 1674.954 | -0.034  | -0.7  | 6.71 | 46283.6  | 6.07  | HUMAN | Q12955 | Ankyrin-3                                                                    |
| 12136 | dirMS_041712_NAR_50mM_plus.9539.9539.2    | 2 | 9.13 | 1.132E+05       | (R)KQVW(K)K R C V N L P G A V A I D I P A V S E K(K) | 14508  | 588.999  | 1764.985 | -0.001  | -1.7  | 6.07 | 30947.9  | 6.47  | HUMAN | ANFQD9 | Sartin B                                                                     |
| 12137 | dirMS_041712_NAR_60mM_plus.14917.14917.3  | 3 | 9.13 | 1.720E+04       | (K)ILTKDOK(K)U T E D K A D V Q S P A G L R A(R)      | 14308  | 595.9398 | 1785.97  | -0.037  | -2    | 4.56 | 90316.8  | 5.52  | HUMAN | Q13263 | Transcription intermediary factor 1-beta                                     |
| 12138 | dirMS_041712_NAR_60mM_minus.8245.8266.3   | 3 | 9.13 | 1.821E+05 M174m | (R)JVKYFE(R)R V Y E T E L I A N R(K)                 | 10605  | 419.2169 | 1239.64  | -15.996 | -0.8  | 5.81 | 43773.3  | 5.26  | HUMAN | F8V2V9 | Keratin, type I cytoskeletal 18                                              |
| 12139 | dirMS_041712_NAR_20mM_plus.6398.6398.2    | 2 | 9.13 | 0.160E+05       | (K)DSYVGD(K)S V I V D I G E A G S R(K)               | 11077  | 599.7645 | 1198.522 | -0.005  | -0.4  | 4.03 | 32616.5  | 5.18  | HUMAN | AN6176 | Actin, alpha skeletal muscle                                                 |
| 12140 | dirMS_041712_NAR_20mM_plus.18495.18495.2  | 2 | 9.13 | 0.237E+05       | (K)WFSQAE(K)R S L E /E L R L E D /Q A N R(K)         | 15547  | 648.3361 | 1291.664 | -0.008  | 0.6   | 4.65 | 71924.9  | 6.25  | HUMAN | BAD742 | Yes1-like tyrosine kinase                                                    |
| 12141 | dirMS_041712_NAR_30mM_plus.20100.20100.3  | 3 | 9.13 | 0.452E+05       | (K)YSLFPL(K)S Y E L L P D C Q Z /I T V G N E R(F)    | 15972  | 597.6334 | 1790.892 | -0.063  | -3.5  | 4.14 | 123097.1 | 5.83  | HUMAN | AS43E0 | POTE ankyrin domain family member F                                          |
| 12142 | dirMS_041712_NAR_40mM_plus.11808.13413.3  | 3 | 9.13 | 3.967E+05       | (K)NLPSPS(K)R L P P S G V A P V T G P P V V V K(Y)   | 6477   | 627.031  | 1879.08  | -0.015  | -0.8  | 8.76 | 31704.6  | 5.73  | HUMAN | F5H4D6 | Ras GTPase-activating protein-binding protein 1                              |
| 12143 | dirMS_041712_NAR_40mM_plus.6727.6727.2    | 2 | 9.13 | 0.168E+04       | (K)SLAAEE(K)S L I A J E E L A A R(K)                 | 99.53  | 521.7589 | 1046.511 | -0.008  | -0.7  | 4.25 | 53377.8  | 5.74  | HUMAN | Q15149 | Plectin                                                                      |
| 12144 | dirMS_041712_NAR_30mM_plus.12324.12324.3  | 3 | 9.13 | 1.491E+05       | (K)SILSDV(K)R I L S D V G I L E A D D R L N R(K)     | 132.85 | 591.6385 | 1772.902 | -0.015  | -0.9  | 4.04 | 11664.7  | 4.42  | HUMAN | P03387 | 60S acidic ribosomal protein P2                                              |
| 12145 | dirMS_041712_NAR_30mM_plus.19980.19980.3  | 3 | 9.13 | 0.501E+05       | (R)YVYVDA(K)Y V I L T G D V L P G R R                | 14182  | 474.5813 | 1418.744 | -0.017  | -5.1  | 6.1  | 52817.6  | 6.32  | HUMAN | ANFQD9 | Sartin B                                                                     |
| 12146 | dirMS_041712_NAR_50mM_plus.7293.7293.3    | 3 | 9.13 | 0.168E+05       | (R)SGSSDQ(R)S G S /E L I D V V P P S A S P Q R(K)    | 10385  | 634.6443 | 1901.92  | -0.016  | -0.8  | 4.68 | 227779.5 | 12.08 | H     |        |                                                                              |

|       |                                            |   |      |   |                |                                                      |        |          |          |         |      |      |          |       |       |                                 |                                                                                                |
|-------|--------------------------------------------|---|------|---|----------------|------------------------------------------------------|--------|----------|----------|---------|------|------|----------|-------|-------|---------------------------------|------------------------------------------------------------------------------------------------|
| 12204 | dirMS_041712_NAR_120mM_minus.17356.17356.4 | 4 | 9.1  | 2 | 5.34E-05       | (KXKDKTK)(K)K D E K T D T L E L D(L)P/T T/K          | 149.03 | 470.992  | 1880.949 | -0.0026 | -1.4 | 4.44 | 8373.65  | 5.55  | HUMAN | P13010                          | X-ray repair cross-complementing protein 5                                                     |
| 12205 | dirMS_041712_NAR_30mM_minus.13830.13830.2  | 2 | 9.1  | 0 | 3.56E-05       | (KLAGLGN)(R)A(L)G(L)N F/E/R/K                        | 128.93 | 524.2789 | 1047.558 | -0.0078 | -7.3 | 6    | 6398.11  | 7.83  | HUMAN | B72909                          | Hypoxia up-regulated protein 1                                                                 |
| 12206 | dirMS_041712_NAR_30mM_minus.18805.18805.2  | 2 | 9.1  | 0 | 1.61E-05       | (KILGK)G(L)R(L)G(L)P(L)P(L)S T/K                     | 157.23 | 631.7973 | 1263.999 | -0.0076 | -1.6 | 10   | 3458.54  | 6.54  | HUMAN | 606474                          | Isocitrate dehydrogenase [NADP] cytoplasmic                                                    |
| 12207 | dirMS_041712_NAR_30mM_minus.18994.18994.2  | 2 | 9.1  | 0 | 2.28E-05       | (KSLKPL)(K)S Y E(L)P D Q Q(V)I T(G)N E R I           | 105.73 | 895.9492 | 1790.892 | -0.0076 | -4.0 | 4.14 | 12309.71 | 8.53  | HUMAN | AS05E                           | POTE ankyrin domain family member F                                                            |
| 12208 | dirMS_041712_NAR_30mM_minus.8105.8105.2    | 2 | 9.1  | 0 | 7.22E-04       | (RLEETMR)(R)F(L)E(L)T/N R(L)                         | 98.53  | 454.7292 | 908.447  | 0.0093  | 4.3  | 4.53 | 28116.6  | 5.26  | HUMAN | ANE7E6                          | Cullin-4B (Fragment)                                                                           |
| 12209 | dirMS_041712_NAR_40mM_minus.10926.10926.3  | 3 | 9.1  | 1 | 1.14E-05 M362m | (R)EGGVN(R)E G V S V M(L)Q(V) D(V)D T V K G G L K(L) | 147.85 | 630.9989 | 1874.989 | -0.0059 | -1   | 4.56 | 45924.5  | 5.29  | HUMAN | BAEF3                           | Selenium-binding protein 1                                                                     |
| 12210 | dirMS_041712_NAR_40mM_minus.14416.14416.3  | 3 | 9.1  | 1 | 3.43E-04       | (R)ILGSPSR(R)K G S F(L)P(V)P(V)A G Q(N)R             | 109.28 | 538.2733 | 1050.993 | -0.0025 | -1.6 | 10   | 3458.54  | 9.42  | HUMAN | Q15785                          | Mitochondrial import receptor subunit TOM34                                                    |
| 12211 | dirMS_041712_NAR_50mM_minus.10779.10779.3  | 3 | 9.1  | 0 | 1.132E-05      | (R)MFLMTR(R)M L U(L)T A G D N P F H G D S A(N)A      | 129.5  | 634.9586 | 1202.865 | -0.0038 | -2   | 4.54 | 6402.5   | 6.4   | HUMAN | B1AH47                          | X-ray repair complementing defective repair in Chinese hamster cells 6 (Ku autoantigen, 70kDa) |
| 12212 | dirMS_041712_NAR_50mM_minus.11159.11159.3  | 3 | 9.1  | 1 | 1.86E-05       | (R)JNKKQA(R)K D N Q A(G)M(F)E/P/T I Y K(V)           | 132.05 | 515.9485 | 1545.827 | -0.0038 | -2.5 | 6.07 | 44327.3  | 7.81  | HUMAN | E7EQ96                          | T-complex protein 1 subunit alpha                                                              |
| 12213 | dirMS_041712_NAR_50mM_minus.16404.16404.3  | 3 | 9.1  | 0 | 5.96E-04 M114m | (R)IAGKVP(R)A G K P V I C A(T)Q/M(L)E S M(K)K        | 160.87 | 631.6612 | 1876.969 | -0.0097 | -2.5 | 8.64 | 18466.1  | 5.78  | HUMAN | H3BSU3                          | Pyruvate kinase (Fragment)                                                                     |
| 12214 | dirMS_041712_NAR_50mM_minus.16441.16441.3  | 3 | 9.1  | 1 | 1.60E-05       | (R)KSVSLV(K)V V I S S V L C Q F G N I S F K(K)       | 162    | 551.6488 | 1052.297 | -0.0052 | -3.1 | 10   | 23349.83 | 5.45  | HUMAN | FBV1L3                          | Mysin-10                                                                                       |
| 12215 | dirMS_041712_NAR_50mM_minus.7718.7718.1    | 1 | 9.1  | 0 | 2.44E-05       | (R)ILELGG(R)C(L)F(L)E(L)G(L)P(L)S T/K                | 111.27 | 467.6071 | 914.698  | -0.0076 | -0.6 | 6.74 | 5607.4   | 6.74  | HUMAN | Keratin, type II cytoskeletal 8 |                                                                                                |
| 12216 | dirMS_041712_NAR_50mM_minus.8302.8302.3    | 3 | 9.1  | 1 | 8.27E-04 M61m  | (K)NQVAM(K)M Q(V)I V M P N T T(V)F D A K R(L)        | 114.92 | 607.968  | 1805.896 | -0.1932 | -1   | 8.75 | 20069.4  | 6.74  | HUMAN | EPK54                           | Heat shock cognate 71 kDa protein (Fragment)                                                   |
| 12217 | dirMS_041712_NAR_60mM_minus.14871.14871.3  | 3 | 9.1  | 1 | 3.80E-05       | (R)IKIGDPL(R)K I G D G P L I L I E D T M R(K)        | 142.73 | 457.2595 | 1369.769 | -0.0046 | -3.4 | 4.56 | 47309.6  | 5.42  | HUMAN | BADXY7                          | 4-trimethylaminobutyraldehyde dehydrogenase                                                    |
| 12218 | dirMS_041712_NAR_60mM_minus.4077.4077.3    | 3 | 9.1  | 1 | 9.42E-04       | (K)GAGDE(K)A G V A D E V R A E T A R(L)              | 77.88  | 425.8679 | 1275.592 | -0.0032 | -2.5 | 4.41 | 57204.9  | 6.01  | HUMAN | FSGWF6                          | T-complex protein 1 subunit beta                                                               |
| 12219 | dirMS_041712_NAR_120mM_plus.6282.6282.3    | 3 | 9.1  | 1 | 5.04E-05       | (R)IARSDG(R)A R S D V G Q(L)S P A T R(G)             | 86.7   | 463.2393 | 918.692  | -0.0115 | -8.3 | 6.12 | 81007.1  | 6.31  | HUMAN | EP9A1F                          | Plectin (Fragment)                                                                             |
| 12220 | dirMS_041712_NAR_20mM_plus.11062.11062.2   | 2 | 9.1  | 0 | 6.40E-03 M94m  | (R)JFSVWF(R)S V M V N D G V I K A(K)                 | 147.97 | 619.8249 | 1222.65  | -0.1925 | -1.9 | 5.84 | 13010.7  | 9.97  | HUMAN | AN6C19                          | Peroxiredoxin-5, mitochondrial                                                                 |
| 12221 | dirMS_041712_NAR_20mM_plus.12589.12589.2   | 2 | 9.1  | 0 | 1.34E-05       | (R)JGVEIC(R)G V E I(L)C A T P G R(L)                 | 159.12 | 586.8084 | 1172.609 | 0.0003  | 0.3  | 6    | 61018.6  | 9.44  | HUMAN | BAD1L8                          | Probable ATP-dependent RNA helicase DDX5                                                       |
| 12222 | dirMS_041712_NAR_20mM_plus.12761.12760.2   | 2 | 9.1  | 0 | 3.54E-05       | (R)INLGLV(R)N(L)G V V V V K(K)                       | 120.72 | 403.7418 | 806.477  | -0.0007 | -0.9 | 8.59 | 96827.3  | 5.58  | HUMAN | EP9P17                          | Neutral alpha-glucosidase AB                                                                   |
| 12223 | dirMS_041712_NAR_30mM_plus.20222.20222.2   | 2 | 9.1  | 0 | 1.71E-05       | (R)KINVDVA(K)N I E D V A V L Q E I G E I(K)          | 100.45 | 628.8445 | 1256.685 | -0.0028 | -2.2 | 4.37 | 8998.8   | 4.38  | HUMAN | HYD08                           | 60S acidic ribosomal protein P2 (Fragment)                                                     |
| 12224 | dirMS_041712_NAR_50mM_plus.7612.7612.3     | 3 | 9.1  | 1 | 3.02E-05       | (R)IVEDDT(R)N V I E Q D T M R P A G V R(H)           | 105.6  | 490.5973 | 1469.778 | -0.0007 | -0.5 | 6.07 | 73386.6  | 8.73  | HUMAN | BAD0X7                          | ATP-dependent RNA helicase DDXVY                                                               |
| 12225 | dirMS_041712_NAR_60mM_plus.17130.17130.3   | 3 | 9.1  | 1 | 6.27E-06       | (K)KLKVPVE(K)K V P W N V D T V T K(L)                | 145.87 | 438.5872 | 1313.746 | -0.0007 | 0.5  | 6.07 | 16060.2  | 10.31 | HUMAN | P93019                          | 40S ribosomal protein S19                                                                      |
| 12226 | dirMS_041712_NAR_60mM_plus.21265.21265.3   | 3 | 9.1  | 0 | 2.23E-05       | (R)IQAPRT(R)Q A R P P T Y A T A M L Q I S L K(L)     | 175.57 | 927.9993 | 1971.979 | -0.0012 | -4   | 9.99 | 150202.8 | 9.1   | HUMAN | E7E020                          | Unconventional myosin-V                                                                        |
| 12227 | dirMS_041712_NAR_60mM_plus.6425.6425.3     | 3 | 9.1  | 1 | 1.135E-05      | (R)ISPPAG(R)S V P V A E P C G E G S A R(K)           | 105.85 | 596.2505 | 1426.728 | -0.0008 | 5.9  | 5.87 | 18862.9  | 9.16  | HUMAN | AN6G05                          | Hematochemical and neurological-expressed 1-like protein                                       |
| 12228 | dirMS_041712_NAR_60mM_plus.8926.8926.3     | 3 | 9.1  | 1 | 8.20E-05       | (R)ISSGSG(R)S S I G G V Y D S V Y S A T H V E I      | 104.85 | 665.9403 | 1995.795 | -0.0072 | -5.6 | 4.81 | 18647.7  | 6.51  | HUMAN | CL4011                          | Cold-inducible RNA-binding protein                                                             |
| 12229 | dirMS_041712_NAR_120mM_minus.4865.4865.3   | 3 | 9.09 | 1 | 5.55E-05       | (K)GAGDE(K)A G V A D E V R A E T A R(L)              | 77.53  | 425.8687 | 1275.592 | -0.0008 | -0.7 | 4.41 | 57204.9  | 6.01  | HUMAN | FSGWF6                          | T-complex protein 1 subunit beta                                                               |
| 12230 | dirMS_041712_NAR_30mM_minus.19885.19994.2  | 2 | 9.09 | 1 | 1.54E-06       | (R)ILFLQV(R)R(L)F I L Q V I K(K)                     | 167.3  | 447.7557 | 894.545  | -0.0006 | -0.7 | 8.75 | 71218.8  | 6.3   | HUMAN | A7Y18                           | Radixin                                                                                        |
| 12231 | dirMS_041712_NAR_30mM_minus.7091.7112.2    | 2 | 9.09 | 0 | 2.75E-05       | (R)IASYSSA(R)S I V I S S V A R(K)                    | 93.9   | 427.7216 | 854.437  | -0.0007 | -0.9 | 8.79 | 59288.4  | 7.16  | HUMAN | Q3L3A3                          | Bifunctional ATP-dependent dihydroxyacetone kinase/FAD-AMP lyase (cyclizing)                   |
| 12232 | dirMS_041712_NAR_30mM_minus.14036.14036.3  | 3 | 9.09 | 1 | 1.43E-05       | (R)IKLQV(R)K I L Q V I S S V A R(K)                  | 145.63 | 511.2871 | 1031.843 | -0.0029 | -6.3 | 5.11 | 28116.6  | 5.55  | HUMAN | FBV1L3                          | Mysin-10                                                                                       |
| 12233 | dirMS_041712_NAR_50mM_minus.15041.15041.3  | 3 | 9.09 | 0 | 4.22E-05       | (R)KIALTFR(R)S A V I L C P F E P P K K(K)            | 153.52 | 637.6375 | 1610.898 | -0.0005 | -0.3 | 8.59 | 49982    | 5.86  | HUMAN | BADYD8                          | T-complex protein 1 subunit epithelial                                                         |
| 12234 | dirMS_041712_NAR_50mM_minus.6130.6130.3    | 3 | 9.09 | 0 | 4.44E-05 M437m | (R)JLESGM(R)E I S G Q N M S I N H T(K)               | 97.77  | 497.9018 | 1475.698 | -0.1927 | -1.5 | 6.75 | 56670.4  | 5.37  | HUMAN | FBV04A                          | Keratin, type II cytoskeletal 8                                                                |
| 12235 | dirMS_041712_NAR_60mM_minus.15379.15379.3  | 3 | 9.09 | 1 | 2.23E-05       | (R)IGPFRM(R)P I K F I N W I D V I T G Q E K(F)       | 146.48 | 563.9575 | 1689.86  | -0.0015 | -0.9 | 6.07 | 26394.9  | 6.5   | HUMAN | BSM5F5                          | GTP-binding nuclear protein Ran                                                                |
| 12236 | dirMS_041712_NAR_60mM_minus.15372.15372.3  | 3 | 9.09 | 1 | 2.57E-05       | (R)IGPFRM(R)P I K F I N W I D V I T G Q E K(F)       | 146.48 | 563.9575 | 1689.86  | -0.0015 | -0.9 | 6.07 | 26394.9  | 6.5   | HUMAN | BSM5F5                          | GTP-binding nuclear protein Ran                                                                |
| 12237 | dirMS_041712_NAR_20mM_plus.15906.15907.3   | 3 | 9.09 | 0 | 2.06E-04 M73m  | (R)IAIYDVE(R)A N I V D L P G T M D V S V R(K)        | 181.03 | 544.6139 | 1615.836 | -0.1912 | -2.3 | 4.03 | 27249.9  | 4.39  | HUMAN | EP9B14                          | Tubulin beta chain                                                                             |
| 12238 | dirMS_041712_NAR_20mM_plus.21922.21922.3   | 3 | 9.09 | 1 | 3.43E-05       | (R)INSILAG(R)S I L A Q V I D L Q S A R(A)            | 170.13 | 472.2638 | 1414.765 | -0.012  | 8.5  | 5.84 | 15111    | 6.44  | HUMAN | BADE64                          | Programmed cell death protein 5                                                                |
| 12239 | dirMS_041712_NAR_50mM_plus.10915.10915.3   | 3 | 9.09 | 1 | 4.68E-05       | (R)IAIYDVE(R)A N I V D L P G T M D V S V R(K)        | 181.03 | 544.6139 | 1615.836 | -0.012  | -4.9 | 4.68 | 26790    | 6.25  | HUMAN | FSG11                           | Proteasome subunit alpha type-1                                                                |
| 12240 | dirMS_041712_NAR_50mM_plus.13302.13302.3   | 3 | 9.09 | 1 | 2.89E-05       | (R)KLSVTE(K)S A V I L C P F E P P K K(K)             | 137.9  | 524.9717 | 1572.884 | -0.0063 | 10.3 | 5.73 | 89750.5  | 5.69  | HUMAN | QBV6E                           | Protein HD1                                                                                    |
| 12241 | dirMS_041712_NAR_50mM_plus.13744.13744.3   | 3 | 9.09 | 1 | 7.51E-05       | (R)IKLQV(R)K I L Q V I S S V A R(K)                  | 140.07 | 485.9522 | 1455.853 | -0.0009 | -1.3 | 6.07 | 61015.7  | 7.13  | HUMAN | AN6B08                          | Fragile X mental retardation protein 1                                                         |
| 12242 | dirMS_041712_NAR_50mM_plus.16318.16318.3   | 3 | 9.09 | 1 | 2.53E-04       | (K)IGADFLV(K)A D P I L Y T E V D L G S G G S K(K)    | 153.82 | 636.6618 | 1907.971 | -0.0001 | -0.0 | 4.68 | 30947.9  | 6.47  | HUMAN | H3BQ34                          | Pyruvate kinase                                                                                |
| 12243 | dirMS_041712_NAR_50mM_plus.7823.7823.3     | 3 | 9.09 | 1 | 9.96E-04       | (K)IGLQAG(K)E L Q J A G A K S/P D E R(K)             | 106.57 | 514.9321 | 1542.776 | 0.0059  | 3.8  | 4.41 | 63374.2  | 8.64  | HUMAN | P06744                          | Glucose-6-phosphate isomerase                                                                  |
| 12244 | dirMS_041712_NAR_50mM_plus.14488.14488.3   | 3 | 9.09 | 1 | 9.75E-05       | (R)KFNALP(R)F N F A L N V I G N V S E A K V(K)       | 132.12 | 586.9647 | 1758.881 | -0.0014 | -0.8 | 8.5  | 193379.8 | 5.48  | HUMAN | Q06010                          | Clastrin heavy chain 1                                                                         |
| 12245 | dirMS_041712_NAR_60mM_plus.14832.14832.3   | 3 | 9.09 | 1 | 2.57E-05       | (R)KINQDQ(R)K I L Q V I S S V A R(K)                 | 140.07 | 485.9522 | 1455.853 | -0.0009 | -1.3 | 6.07 | 61015.7  | 6.72  | HUMAN | B72E24                          | Mysin II glycoprotein 6E                                                                       |
| 12246 | dirMS_041712_NAR_60mM_plus.17726.17726.3   | 3 | 9.09 | 1 | 1.41E-05       | (R)INSLAG(R)S I L A Q V I D L Q S A R(A)             | 170.13 | 472.2638 | 1414.765 | -0.012  | 3.1  | 6.74 | 20940.9  | 10.04 | HUMAN | Q9NS07                          | Actin-related nucleoside-triphosphatase                                                        |
| 12247 | dirMS_041712_NAR_60mM_plus.20375.20375.3   | 3 | 9.09 | 1 | 4.21E-05       | (K)NAAAGA(K)N A G A V A L D L N K E(L)K              | 166.93 | 452.6004 | 1355.789 | -0.0006 | -2.2 | 6.07 | 13786.8  | 9.33  | HUMAN | B7Z51                           | Transcription elongation factor A protein 1                                                    |
| 12248 | dirMS_041712_NAR_60mM_plus.20405.20564.3   | 3 | 9.09 | 1 | 3.02E-05       | (R)IADEGN(R)A Q I F E V T D L I R(R)T                | 146.7  | 506.6178 | 1517.843 | -0.0046 | -3   | 6.12 | 18505.2  | 10.14 | HUMAN | HY0Y66                          | Stress-70 protein, mitochondrial (Fragment)                                                    |
| 12249 | dirMS_041712_NAR_60mM_plus.4520.4520.3     | 3 | 9.09 | 1 | 2.57E-05       | (R)IATGDN(R)A T E G M V V A D K N K S(K)             | 92.48  | 503.9055 | 1509.704 | -0.0021 | -1.1 | 6.11 | 15607.8  | 9.99  | HUMAN | BADP1                           | Proteasome (Prosome, macropain) subunit, beta type, 7, isoform CRA_b                           |
| 12250 | dirMS_041712_NAR_120mM_minus.12687.12687.3 | 3 | 9.08 | 0 | 6.33E-05       | (K)ITTFATW(K)F T T A W C N S H L R(K)                | 122.4  | 464.8871 | 1392.648 | -0.001  | -0.7 | 9.44 | 104488.6 | 5.36  | HUMAN | B2K2C5                          | Actin, alpha 2, isoform CRA_b                                                                  |
| 12251 | dirMS_041712_NAR_120mM_minus.17742.17742.3 | 3 | 9.08 | 1 | 1.85E-05       | (R)IAGKLP(R)A G K L P D H V L D Q S K(K)             | 151.48 | 525.6385 | 1574.901 | -0.0004 | -0.2 | 6.79 | 23439.83 | 5.45  | HUMAN | FBV1L3                          | Mysin-10                                                                                       |
| 12252 | dirMS_041712_NAR_120mM_minus.7422.7422.3   | 3 | 9.08 | 1 | 3.19E-05       | (K)IYEGDE(K)Y I E D G D D M K R(K)                   | 94.63  | 452.8645 | 1356.574 | 0.0053  | 3.9  | 4.03 | 21341.9  | 7.77  | HUMAN | QSR370                          | Calyxin binding protein                                                                        |
| 12253 | dirMS_041712_NAR_30mM_minus.10372.10372.2  | 2 | 9.08 | 0 | 2.81E-05       | (R)ITAEAD(R)E T A E I A D V S L T N R(R)             | 110.08 | 638.1314 | 1275.618 | -0.002  | 1.6  | 4.14 | 31923.6  | 4.85  | HUMAN | Q72792                          | Tomoponyin alpha-1 chain                                                                       |
| 12254 | dirMS_041712_NAR_                          |   |      |   |                |                                                      |        |          |          |         |      |      |          |       |       |                                 |                                                                                                |





|       |                                            |   |      |   |          |                                                          |                     |        |          |          |            |         |      |          |        |                                      |         |                                                                                                 |
|-------|--------------------------------------------|---|------|---|----------|----------------------------------------------------------|---------------------|--------|----------|----------|------------|---------|------|----------|--------|--------------------------------------|---------|-------------------------------------------------------------------------------------------------|
| 12531 | dirMS_041712_NAR_60mM_minus.10088.10088.3  | 3 | 8.96 | 1 | 1.34e-04 | (R)VAIEP(R)V(A)I/E/P/G/A/P/R/E/D/F/C/K(M)                | C.Carbonmethylation | 115.98 | 611.2977 | 1831.864 | 0.0142     | 7.8     | 4.41 | 36856.1  | 8.55   | HUMAN                                | HDYLA4  | Sorbitol dehydrogenase                                                                          |
| 12532 | dirMS_041712_NAR_60mM_minus.7527.7527.3    | 3 | 8.96 | 0 | 1.58E-05 | (R)AHSS(R)A A H S E G N I T T A H G L D M R(E)           |                     | 101.22 | 510.9003 | 1530.697 | -0.0012    | -6.7    | 5.32 | 57829.5  | 6.01   | HUMAN                                | FR8711  | T-complex protein 1 subunit beta                                                                |
| 12533 | dirMS_041712_NAR_120mM_plus.5294.5294.3    | 3 | 8.96 | 1 | 1.54E-05 | (R)KQSE(R)W(D)G(V)G(L)G(L)G(L)G(L)G(L)                   |                     | 81.42  | 544.583  | 1444.58  | 0.0171     | 12      | 3.95 | 54214.21 | 3.12   | HUMAN                                | ALDH3B1 | Caldesmon (Fragment)                                                                            |
| 12534 | dirMS_041712_NAR_120mM_plus.7883.7883.2    | 2 | 8.96 | 0 | 5.08E-05 | (R)KJSS 506.8014 1120.60 -0.0042                         | -3.7                | 8.34   | 12137.8  | 9.3      | 6.75       | 87447.6 | 9.3  | HUMAN    | AKP6W0 | Elongation factor 1-alpha (Fragment) |         |                                                                                                 |
| 12535 | dirMS_041712_NAR_120mM_plus.8049.8147.2    | 2 | 8.96 | 0 | 5.78E-05 | (K)HYHEI(R)K(V)A(L)N A LV RT                             |                     | 96.27  | 518.005  | 1033.488 | 0.0013     | 1.3     | 6.75 | 87447.6  | 6.44   | HUMAN                                | Q15437  | Protein transport protein Sec23B                                                                |
| 12536 | dirMS_041712_NAR_20mM_plus.8671.8671.2     | 2 | 8.96 | 0 | 1.87E-05 | (K)GGKPF(R)K G E K P P P A I P Q P V I P T A I           | m.DnaE2 methionase  | 130.62 | 795.402  | 1573.804 | 15.9924    | -1.6    | 6    | 25451.5  | 9.92   | HUMAN                                | EPRL09  | 40S ribosomal protein S3                                                                        |
| 12537 | dirMS_041712_NAR_30mM_plus.16771.16771.2   | 2 | 8.96 | 0 | 4.32E-05 | (K)SGFPL(R)K V L I P P Q V I Q A D E                     |                     | 140.87 | 651.386  | 1311.507 | 0.0009     | 0.7     | 5.83 | 33858.7  | 5.11   | HUMAN                                | EQK4V5  | Phosphoprotein                                                                                  |
| 12538 | dirMS_041712_NAR_30mM_plus.17401.17401.2   | 2 | 8.96 | 0 | 1.64E-05 | (R)ASLEA(R)A S L E A N A A D A I E Q I R(T)              | C.Carbonmethylation | 145.03 | 672.8406 | 1344.675 | -0.0015    | -1.1    | 4.14 | 56607.4  | 5.37   | HUMAN                                | FBV04   | Keratin, type II cytoskeletal 8                                                                 |
| 12539 | dirMS_041712_NAR_30mM_plus.20334.20334.2   | 2 | 8.96 | 0 | 1.62E-04 | (R)JILLGG(R) L G L V L Q D N A G K R(GT)                 |                     | 161.7  | 563.8448 | 1126.683 | -0.0007    | -0.6    | 5.84 | 20626.3  | 6.76   | HUMAN                                | P36405  | ADP-ribosylation factor-like protein 3                                                          |
| 12540 | dirMS_041712_NAR_30mM_plus.2940.9940.2     | 2 | 8.96 | 0 | 7.22E-05 | (R)IGDITD(R) T G D V I T D E Q I R(T)                    |                     | 105.63 | 574.288  | 1417.559 | 0.0008     | 8.5     | 4.03 | 103045.5 | 7.1    | HUMAN                                | BR2V1   | RNA-binding protein 12B                                                                         |
| 12541 | dirMS_041712_NAR_40mM_plus.15653.15653.3   | 3 | 8.96 | 0 | 1.01E-04 | (R)IGVIVC(R) Q I T Q V I S F D I V Q I K(R)              | C.Carbonmethylation | 158.6  | 606.3237 | 1816.963 | -0.006     | -3.3    | 6.74 | 83400.6  | 6.82   | HUMAN                                | Q20299  | ATP-dependent RNA helicase DDX1                                                                 |
| 12542 | dirMS_041712_NAR_40mM_plus.17210.17210.3   | 3 | 8.96 | 1 | 3.36E-06 | (R)KIVATM(R)K V I A T M V I L D P I N A L I R(S)         |                     | 168.1  | 631.766  | 1380.983 | -0.0012    | -5.2    | 5.93 | 32827.5  | 5.95   | HUMAN                                | Q15437  | H2A histone acetyltransferase 1                                                                 |
| 12543 | dirMS_041712_NAR_40mM_plus.9873.9873.2     | 2 | 8.96 | 0 | 8.87E-04 | (K)FFQDQ(K) F I F P Q V R I R(S)                         |                     | 122.05 | 438.2084 | 875.405  | 0.0049     | 5.6     | 5.83 | 334221.3 | 6.44   | HUMAN                                | P15924  | Desmoplakin                                                                                     |
| 12544 | dirMS_041712_NAR_50mM_plus.13838.13838.3   | 3 | 8.96 | 0 | 1.48E-06 | (K)IDJALQ(K) L A G C I A N G L S I C V I R(K)            | C.Carbonmethylation | 140.47 | 641.9061 | 1383.705 | -0.0012    | -0.8    | 6.74 | 45578.2  | 7.83   | HUMAN                                | B4DF12  | Isocitrate dehydrogenase [NADP]                                                                 |
| 12545 | dirMS_041712_NAR_50mM_plus.17011.17012.3   | 3 | 8.96 | 0 | 7.43E-05 | (R)IQYTLR(R) Q Y Y T L V L Q A P D M L H R(K)            |                     | 156.98 | 621.6447 | 1862.922 | -0.0022    | -1.2    | 6.74 | 4335.1   | 9.82   | HUMAN                                | ESR000  | Ras GTPase-activating protein-binding protein 1                                                 |
| 12546 | dirMS_041712_NAR_50mM_plus.19007.19007.3   | 3 | 8.96 | 1 | 2.87E-05 | (K)ILAFQ(K) L A L F I G V A E V V D R I R(K)             |                     | 168.12 | 526.376  | 1058.895 | -0.004     | -2.6    | 6.07 | 26165.1  | 6.58   | HUMAN                                | EPRL09  | Epipkain                                                                                        |
| 12547 | dirMS_041712_NAR_60mM_plus.16593.16593.3   | 3 | 8.96 | 0 | 1.92E-05 | (R)ILSVEQ(R) S L I S Q I G P E L P L A G V R I R(K)      |                     | 143.7  | 546.207  | 1636.881 | -0.0041    | -2.5    | 6.75 | 80685.1  | 7.31   | HUMAN                                | PO5565  | Propionyl-CoA carboxylase alpha chain, mitochondrial                                            |
| 12548 | dirMS_041712_NAR_60mM_plus.7983.7983.3     | 3 | 8.96 | 1 | 5.81E-05 | (K)LSRQEK(K) A L I S R E V M Q V Q S S R I R(S)          |                     | 100.27 | 550.2735 | 1648.807 | -0.0012    | -0.7    | 6.19 | 37486.1  | 9.03   | HUMAN                                | P23226  | Heterogeneous nuclear ribonucleoproteins A2/B1                                                  |
| 12549 | dirMS_041712_NAR_120mM_minus.11012.11012.3 | 3 | 8.95 | 1 | 2.18E-05 | (R)IDHMM(R) D H R M I G S W F I R V R E K I S            | n.Hydroxylysine(S)  | 114.47 | 654.9729 | 1759.833 | 203370.078 | -4.3    | 8.51 | 51648.4  | 5.55   | HUMAN                                | BTX609  | Protein phosphatase 1M                                                                          |
| 12550 | dirMS_041712_NAR_120mM_minus.9280.9280.3   | 3 | 8.95 | 1 | 1.47E-05 | (R)IGFAEE(R) R E Q A E F E R Y R I R(K)                  |                     | 108.9  | 452.8778 | 1356.518 | 0.001      | 0.7     | 4.5  | 12248.6  | 9.34   | HUMAN                                | Q8U12   | ATPase-inhibitor, mitochondrial                                                                 |
| 12551 | dirMS_041712_NAR_30mM_plus.5834.5834.2     | 2 | 8.95 | 0 | 4.20E-04 | (R)IVSTEV(R) S V T E V D A R I R(K)                      |                     | 86.07  | 438.7245 | 876.442  | -0.0004    | -0.5    | 4.37 | 35556.4  | 9.3    | HUMAN                                | T22393  | Transaldolase                                                                                   |
| 12552 | dirMS_041712_NAR_40mM_minus.11654.11654.3  | 3 | 8.95 | 1 | 1.33E-04 | (R)IDJLAE(R) I D A L I G D K N V S L G E T I A E R I L   |                     | 151.8  | 620.3199 | 1858.95  | -0.0053    | -2.9    | 4.32 | 285798.6 | 5.23   | HUMAN                                | ANG651  | Spectrin alpha chain, non-erythrocytic 1                                                        |
| 12553 | dirMS_041712_NAR_50mM_minus.11600.11600.3  | 3 | 8.95 | 1 | 1.92E-05 | (K)IEVEPK(R) K V M E F P A I A K E I L                   |                     | 134.34 | 458.5927 | 1373.767 | -0.0039    | -2.9    | 5.01 | 23799.1  | 9.48   | HUMAN                                | P23284  | Peptidyl-prolyl cis-trans isomerase B                                                           |
| 12554 | dirMS_041712_NAR_50mM_minus.11738.11738.3  | 3 | 8.95 | 0 | 2.43E-05 | (K)TEEPEK(R) Q V I E V I F T I G R V A N A K N I         | m.DnaE2 methionase  | 134.33 | 576.6239 | 1720.869 | 15.9885    | -3.7    | 5.81 | 38222.2  | 5.77   | HUMAN                                | EPRL01  | Protein arginine-N-methyltransferase 1                                                          |
| 12555 | dirMS_041712_NAR_50mM_minus.14773.14773.3  | 3 | 8.95 | 0 | 4.12E-05 | (K)QLEAK(K) L L A I D G L L V L Y A K R I R              |                     | 100.42 | 537.627  | 1670.875 | 0.0042     | 5.2     | 4.65 | 80254.2  | 6.64   | HUMAN                                | EPRL04  | Alpha actinin-4 short isoform                                                                   |
| 12556 | dirMS_041712_NAR_50mM_minus.17789.17789.3  | 3 | 8.95 | 1 | 2.31E-05 | (K)ILAFQA(K) L A L V A G V K E V D D R I R               |                     | 170.53 | 520.3043 | 1558.895 | 0.0032     | 2       | 6.07 | 26165.1  | 5.68   | HUMAN                                | EPRL09  | Epipkain                                                                                        |
| 12557 | dirMS_041712_NAR_50mM_minus.18203.18203.3  | 3 | 8.95 | 1 | 2.31E-05 | (K)ILKEAL(K) K V E A L L L E I P L M P A I R I A         |                     | 127.78 | 574.957  | 1722.982 | -0.0007    | -5.6    | 4.79 | 56164.6  | 6.01   | HUMAN                                | EPRL03  | Coatmer subunit beta (Fragment)                                                                 |
| 12558 | dirMS_041712_NAR_50mM_minus.7856.7856.3    | 3 | 8.95 | 0 | 4.58E-04 | (R)IQLSQA(R) L S L Q G V S F F D T F M G G L R Y I       |                     | 111.92 | 575.2875 | 1717.825 | 0.0027     | 1.3     | 6.74 | 26165.1  | 5.68   | HUMAN                                | EPRL09  | Epipkain                                                                                        |
| 12559 | dirMS_041712_NAR_50mM_minus.12676.12676.3  | 3 | 8.95 | 1 | 1.29E-05 | (R)ISLQV(R) S L I S Q I G P E L P L A G V R I R(K)       |                     | 118.1  | 549.134  | 1573.821 | -0.0011    | -4.5    | 5.92 | 30211.1  | 6.44   | HUMAN                                | EPRL09  | Epipkain                                                                                        |
| 12560 | dirMS_041712_NAR_60mM_minus.18186.18186.3  | 3 | 8.95 | 1 | 1.37E-05 | (R)ISEULT(R) S E I L E L T L G L I Q V R I R(K)          |                     | 163.05 | 538.9724 | 1614.906 | -0.0035    | -2.1    | 4.78 | 53377.8  | 5.74   | HUMAN                                | Q15149  | Plectin                                                                                         |
| 12561 | dirMS_041712_NAR_120mM_plus.8528.8549.3    | 3 | 8.95 | 0 | 1.29E-04 | (K)IMADHM(K) M A D M V D E T A P R I R(K)                |                     | 97.3   | 405.188  | 1213.542 | 0.0076     | 6.2     | 5.3  | 168833.1 | 6.11   | HUMAN                                | FRVU51  | YLP motif-containing protein                                                                    |
| 12562 | dirMS_041712_NAR_20mM_plus.12474.12474.2   | 2 | 8.95 | 0 | 2.52E-05 | (K)ILGLVE(K) L A Q L V L V I Q V I R(K)                  |                     | 134.55 | 493.2863 | 985.568  | -0.0023    | -2.4    | 4.37 | 61018.6  | 9.44   | HUMAN                                | B4DVL8  | Probable ATP-dependent RNA helicase DDX5                                                        |
| 12563 | dirMS_041712_NAR_30mM_plus.12123.12123.2   | 2 | 8.95 | 0 | 1.88E-05 | (R)IDHMS(R) D H R M I G S W F I R V R E K I S            |                     | 108.9  | 452.8778 | 1356.518 | 0.001      | 0.7     | 4.5  | 12248.6  | 9.34   | HUMAN                                | Q8U12   | ATPase-inhibitor, mitochondrial                                                                 |
| 12564 | dirMS_041712_NAR_40mM_plus.2326.9267.3     | 3 | 8.95 | 0 | 7.25E-03 | (R)IVMTEG(R) V M I L V Q T V N P A D V S K P G T I R I G |                     | 117.13 | 603.3077 | 1785.916 | 15.9922    | -1.5    | 6.04 | 15431.7  | 9      | HUMAN                                | ETR010  | Nucleoside diphosphate kinase A                                                                 |
| 12565 | dirMS_041712_NAR_50mM_plus.17361.17361.3   | 3 | 8.95 | 1 | 9.11E-05 | (R)IVVAEP(R) V I Y I A E D P Y K S F G L S R I L         |                     | 159.33 | 633.6509 | 1898.965 | -0.0265    | -14     | 6.04 | 80685.1  | 7.31   | HUMAN                                | PO5565  | Propionyl-CoA carboxylase alpha chain, mitochondrial                                            |
| 12566 | dirMS_041712_NAR_50mM_plus.20223.20223.3   | 3 | 8.95 | 0 | 3.21E-05 | (R)INEVSV(R) N E V S V V I H N L P V A K I M             |                     | 174.43 | 560.6511 | 1679.948 | -0.0032    | -1.9    | 6.75 | 35663.7  | 5.91   | HUMAN                                | B4DWK0  | Selenide, wide dkinase 1                                                                        |
| 12567 | dirMS_041712_NAR_50mM_plus.2695.2695.3     | 3 | 8.95 | 1 | 1.08E-06 | (K)ITGAPG(K) I T A G V I A S A Q C K P A G V R I R       |                     | 91.9   | 475.5987 | 1424.786 | -0.0041    | -2.8    | 10   | 75259.2  | 5.99   | HUMAN                                | BM0TE9  | Mitochondrial-associated protein 4 (Fragment)                                                   |
| 12568 | dirMS_041712_NAR_50mM_plus.2808.9809.3     | 3 | 8.95 | 1 | 5.18E-04 | (R)IVSSVM(R) V S I D N V A D I L A E Y S G S T P I       |                     | 118.8  | 635.9651 | 1905.862 | -0.0013    | -0.7    | 4.54 | 17952.8  | 6.73   | HUMAN                                | EPRL02  | Proteasome subunit beta type-5                                                                  |
| 12569 | dirMS_041712_NAR_60mM_plus.10829.10829.3   | 3 | 8.95 | 1 | 3.32E-04 | (K)IGENYI(K) K G E N V Y I V I L A N T R I R(K)          | n.Hydroxylysine(S)  | 114.25 | 519.5996 | 1556.77  | 0.0139     | 8.9     | 6.14 | 26165.1  | 5.68   | HUMAN                                | EPRL09  | Epipkain                                                                                        |
| 12570 | dirMS_041712_NAR_60mM_plus.17347.17347.3   | 3 | 8.95 | 0 | 2.00E-05 | (K)ILSFSQ(K) L S F S Q I H V A E L T R I R(K)            |                     | 147.5  | 496.6156 | 1293.753 | 2033.0797  | 0.02    | 8.76 | 41560.9  | 5.97   | HUMAN                                | B7Z6X4  | Cyclin-I                                                                                        |
| 12571 | dirMS_041712_NAR_60mM_plus.19451.196123.2  | 3 | 8.95 | 1 | 4.46E-04 | (R)ISJADN(R) S L I A D I A R E E S F N F R I S           |                     | 159.53 | 526.9346 | 1578.787 | -0.0022    | -1.4    | 4.68 | 24058.8  | 4.99   | HUMAN                                | GV3AV5  | Proteasome subunit alpha type-3                                                                 |
| 12572 | dirMS_041712_NAR_60mM_plus.19451.196123.2  | 3 | 8.95 | 1 | 1.02E-05 | (R)ISJADN(R) S L I A D I A R E E S F N F R I S           |                     | 92.17  | 481.9514 | 1228.246 | -0.0017    | -9.7    | 6.19 | 37486.1  | 4.99   | HUMAN                                | GV3AV5  | Proteasome subunit alpha type-3                                                                 |
| 12573 | dirMS_041712_NAR_120mM_minus.20158.20158.3 | 3 | 8.94 | 0 | 2.08E-05 | (K)GGGFG(K) P G G G D V S P I R V I R(K)                 |                     | 166.23 | 467.2504 | 1395.737 | -0.0002    | -0.2    | 8.59 | 64382.8  | 6.4    | HUMAN                                | BIACH7  | X-ray repair complementing defective protein in Chinese hamster cells 6 (Ku autoantigen, 70kDa) |
| 12574 | dirMS_041712_NAR_120mM_minus.4379.4379.2   | 2 | 8.94 | 0 | 3.95E-05 | (K)HYAM(K) H Y I A M Q I E V A K I Q                     |                     | 72.92  | 489.2307 | 977.451  | 0.0032     | 3.3     | 6.75 | 39309.6  | 4.32   | HUMAN                                | FRWCY5  | Reticulocalbin-2                                                                                |
| 12575 | dirMS_041712_NAR_20mM_minus.7053.7053.2    | 2 | 8.94 | 0 | 4.77E-05 | (R)IAEAS(R) R I A I E I S M Y Q I K R I                  | m.DnaE2 methionase  | 117.9  | 593.2759 | 1169.551 | 15.9938    | -0.9    | 4.53 | 37296.3  | 5.3    | HUMAN                                | FRVU64  | Keratin, type II cytoskeletal 8                                                                 |
| 12576 | dirMS_041712_NAR_30mM_minus.10812.10812.3  | 3 | 8.94 | 0 | 3.38E-04 | (R)IGTFNAR(R) F T F M A H N R I E V S T A A R R I        |                     | 128.28 | 558.6229 | 1673.861 | -0.0046    | -3.8    | 6.75 | 48983    | 7.3    | HUMAN                                | PH8411  | Elongation factor Tu, mitochondrial                                                             |
| 12577 | dirMS_041712_NAR_30mM_minus.15644.15643.3  | 3 | 8.94 | 0 | 1.81E-05 | (R)IQDVGQ(R) V D I Q V G L S L E T Y L E A H R I R       |                     | 3.56   | 614.9953 | 1842.971 | 0.0005     | 0.3     | 5.4  | 81934.1  | 6.08   | HUMAN                                | P33993  | DNA replication licensing factor CMCT7                                                          |
| 12578 | dirMS_041712_NAR_30mM_minus.17707.17707.3  | 3 | 8.94 | 1 | 1.66E-04 | (K)JLAEQ(K) K I A I E Q A E Y R D I M A N C M K I S      | C.Carbonmethylation | 111.05 | 639.9511 | 1901.819 | 16.0197    | 12.9    | 4.32 | 5919.6   | 4.73   | HUMAN                                | ESRG1E  | 14-3-3 protein zeta/delta (Fragment)                                                            |
| 12579 | dirMS_041712_NAR_60mM_minus.14258.14258.3  | 3 | 8.94 | 1 | 8.82E-05 | (R)IMSMEK(R) M S M K E V E D Q I L V N Q N K I N         |                     | 140.17 | 641.9701 | 1921.897 | -0.0015    | -0.8    | 6.08 | 40069.4  |        |                                      |         |                                                                                                 |



|       |                                            |   |      |   |                |                                                    |        |          |          |         |      |      |          |             |          |                                                              |
|-------|--------------------------------------------|---|------|---|----------------|----------------------------------------------------|--------|----------|----------|---------|------|------|----------|-------------|----------|--------------------------------------------------------------|
| 12640 | drfMS_041712_NAR_50mM_plus2.10723.10723.3  | 3 | 8.92 | 1 | 4.936E-05      | (R)DGKLV(R)D G K L V S [E]S/D V/LP(K)              | 124.1  | 491.9313 | 1473.78  | -0.002  | -0.1 | 4.56 | 56607.4  | 5.37 HUMAN  | F8V0B4   | Keratin, type II cytoskeletal 8                              |
| 12641 | drfMS_041712_NAR_50mM_plus2.11799.11799.3  | 3 | 8.92 | 1 | 7.42E-05       | (R)IIVN(R)I(V)N/V N E A T G G K Y/V R(A)           | 130.43 | 615.3151 | 1843.934 | -0.003  | -1.6 | 8.43 | 50286.6  | 4.79 HUMAN  | P68371   | Tubulin beta-4B chain                                        |
| 12642 | drfMS_041712_NAR_50mM_plus2.14986.14986.3  | 3 | 8.92 | 0 | 5.58E-05       | (R)IIVN(R)I(V)N/V N E A T G G K Y/V R(A)           | 145.0  | 327.25   | 1594.87  | -0.001  | -0.7 | 6.19 | 37426.1  | 9.03 HUMAN  | P22626   | Heterogeneous nuclear ribonucleoproteins A2/B1               |
| 12643 | drfMS_041712_NAR_50mM_plus2.16447.16447.3  | 3 | 8.92 | 0 | 7.49E-05       | (R)KVVH(R)K(N)A/V N L H M L S/S/P/E/Q I(K)Q        | 154.68 | 603.3265 | 1807.974 | -0.005  | -4.7 | 6.79 | 104619   | 5.75 HUMAN  | F8W904   | Exportin-2                                                   |
| 12644 | drfMS_041712_NAR_50mM_plus2.22163.22163.3  | 3 | 8.92 | 1 | 1.61E-04       | (K)EGGL(R)K(G)G/L/G/P L/V P L L A D V T R(L)       | 190.08 | 631.029  | 1891.076 | -0.0035 | -1.9 | 6.17 | 15252.2  | 5.82 HUMAN  | AN1W5    | Peroxiredoxin 2, isoform CRA_a                               |
| 12645 | drfMS_041712_NAR_50mM_plus2.99291.9923.3   | 3 | 8.92 | 1 | 9.24E-05 M227m | (R)IIVN(R)I(V)N/V N E A T G G K Y/V R(A)           | 119.38 | 522.2726 | 1548.812 | 15.9908 | -2.6 | 8.35 | 32616.5  | 5.18 HUMAN  | AN6176   | Actin, alpha skeletal muscle                                 |
| 12646 | drfMS_041712_NAR_50mM_plus2.8072.8069.3    | 3 | 8.92 | 1 | 6.10E-05       | (K)IASGR(R)I(L)S/R E/V M/D/V Q/D/S S(R)S           | 102.33 | 550.2735 | 1648.267 | -0.001  | -0.7 | 6.19 | 37426.1  | 9.03 HUMAN  | P22626   | Heterogeneous nuclear ribonucleoproteins A2/B1               |
| 12647 | drfMS_041712_NAR_120mM_minus.13524.13524.3 | 3 | 8.91 | 0 | 4.86E-05       | (K)IIVN(R)I(V)N/V N E A T G G K Y/V R(A)           | 128.35 | 466.2346 | 1402.669 | 0.0208  | 14.8 | 8.75 | 10536.9  | 6.19 HUMAN  | PE3367   | Dynein light chain 1, cytoplasmic                            |
| 12648 | drfMS_041712_NAR_20mM_minus.12352.12352.3  | 3 | 8.91 | 0 | 7.61E-05 M73m  | (R)IAVL(R)I(A)V/L/V L/H C/P/G/T/M/D S V S(R)S      | 172.45 | 539.9423 | 1601.82  | 15.992  | -1.8 | 4.03 | 13112.4  | 5.23 HUMAN  | F8W813   | Tubulin beta-8 chain                                         |
| 12649 | drfMS_041712_NAR_20mM_minus.12357.12357.3  | 3 | 8.91 | 0 | 7.85E-05 M73m  | (R)IAVL(R)I(A)V/L/V L/H C/P/G/T/M/D S V S(R)S      | 172.48 | 539.9423 | 1601.82  | 15.992  | -1.8 | 4.03 | 13112.4  | 5.23 HUMAN  | F8W813   | Tubulin beta-8 chain                                         |
| 12650 | drfMS_041712_NAR_30mM_minus.17762.17762.2  | 2 | 8.91 | 0 | 6.65E-04       | (K)IFAGG(R)K(F)F/A/S/D T P P I(K)S                 | 151.17 | 554.8038 | 1108.604 | -0.0034 | -3.1 | 5.84 | 258215.9 | 5.48 HUMAN  | E7E905   | Flamin-8                                                     |
| 12651 | drfMS_041712_NAR_30mM_minus.7088.7088.2    | 2 | 8.91 | 0 | 3.32E-05       | (K)IIVN(R)I(V)N/V N E A T G G K Y/V R(A)           | 92.49  | 528.2297 | 1075.406 | 0.0039  | 3    | 4.17 | 40516.6  | 9.14 HUMAN  | P12270   | Protein phosphatase 1 regulatory subunit 12A (Fragment)      |
| 12652 | drfMS_041712_NAR_30mM_minus.9512.9512.2    | 2 | 8.91 | 0 | 1.22E-05       | (K)IIVN(R)I(V)N/V N E A T G G K Y/V R(A)           | 106.07 | 429.7546 | 858.493  | 0.0088  | 10.3 | 4.37 | 267887.4 | 4.97 HUMAN  | P12270   | Nucleoporin TPR                                              |
| 12653 | drfMS_041712_NAR_50mM_minus.12136.12136.3  | 3 | 8.91 | 0 | 9.91E-04       | (R)IILAI(R)I(L)A/L/G L/H/V N E V S(K)I             | 137.17 | 413.9219 | 1293.753 | -0.0014 | -1.1 | 4.75 | 107710.1 | 5.38 HUMAN  | B77116   | Actinin alpha 1 isoform 3                                    |
| 12654 | drfMS_041712_NAR_50mM_minus.17826.17826.3  | 3 | 8.91 | 1 | 2.31E-05       | (K)IIVN(R)I(V)N/V N E A T G G K Y/V R(A)           | 170.53 | 520.3043 | 1558.895 | 0.0024  | -2   | 6.07 | 266161   | 5.68 HUMAN  | E9PPU0   | Epipkatin                                                    |
| 12655 | drfMS_041712_NAR_60mM_minus.1874.1874.3    | 3 | 8.91 | 0 | 2.88E-05       | (K)IIVN(R)I(V)N/V N E A T G G K Y/V R(A)           | 165.82 | 551.2817 | 1671.833 | -0.024  | -1.5 | 4.65 | 20039.9  | 6.24 HUMAN  | HOV050   | Creatine kinase B-type (Fragment)                            |
| 12656 | drfMS_041712_NAR_60mM_minus.18854.18854.3  | 3 | 8.91 | 0 | 1.43E-05       | (K)IVAH(R)K(V)A H A L A G/V A/G E I C G E(K)I      | 166.95 | 603.3262 | 1807.974 | -0.0094 | -5.2 | 5.4  | 31075.7  | 5.65 HUMAN  | PG0174   | Triphosphatase isomerase                                     |
| 12657 | drfMS_041712_NAR_120mM_plus.11271.11271.3  | 3 | 8.91 | 1 | 2.23E-05       | (K)IIVN(R)I(V)N/V N E A T G G K Y/V R(A)           | 112.6  | 530.2516 | 1588.739 | 0.0012  | 0.8  | 6.07 | 87447.6  | 6.44 HUMAN  | Q15437   | Protein transport protein Sec23B                             |
| 12658 | drfMS_041712_NAR_120mM_plus.7203.7203.2    | 2 | 8.91 | 1 | 1.06E-06       | (R)IIVN(R)I(V)N/V N E A T G G K Y/V R(A)           | 90.95  | 455.2548 | 909.504  | -0.0017 | -1.9 | 8.5  | 49012.3  | 4.19 HUMAN  | AM8081   | Tubulin alpha-4A chain                                       |
| 12659 | drfMS_041712_NAR_20mM_plus.12339.12339.2   | 2 | 8.91 | 0 | 1.17E-05       | (K)IIVN(R)I(V)N/V N E A T G G K Y/V R(A)           | 107.67 | 817.4114 | 1633.821 | -0.0059 | -3.6 | 5.97 | 47326.4  | 9.76 HUMAN  | P19329   | Beta-enolase                                                 |
| 12660 | drfMS_041712_NAR_20mM_plus.17516.17516.3   | 3 | 8.91 | 0 | 1.38E-04 M19m  | (K)IIVN(R)I(V)N/V N E A T G G K Y/V R(A)           | 125.58 | 551.9759 | 1637.93  | 15.9837 | -6.8 | 5.55 | 29854.8  | 9.49 HUMAN  | CU3390   | Regulator of chromosome condensation (Fragment)              |
| 12661 | drfMS_041712_NAR_30mM_plus2.16687.16687.2  | 2 | 8.91 | 0 | 3.12E-05       | (R)IQAG(R)I(S)I/QA/D G L/V/M/S S(K)I               | 140.42 | 674.3475 | 1347.69  | -0.0026 | -1.9 | 5.55 | 24934.4  | 4.5 HUMAN   | P24534   | Elongation factor 1-beta                                     |
| 12662 | drfMS_041712_NAR_30mM_plus2.20362.20362.2  | 2 | 8.91 | 0 | 6.67E-04       | (K)IIVN(R)I(V)N/V N E A T G G K Y/V R(A)           | 160.6  | 572.32   | 1143.634 | -0.0016 | -1.4 | 9.75 | 42230.8  | 4.77 HUMAN  | AN6K28   | Putative tubulin beta chain-like protein ENSP0000290377      |
| 12663 | drfMS_041712_NAR_30mM_plus2.21507.21507.2  | 2 | 8.91 | 0 | 2.83E-05       | (R)IADDD(R)I(A)D/D/V N/V N W L(K)I                 | 167.57 | 801.81   | 1202.605 | 0.0075  | 6.3  | 4.03 | 26863.4  | 4.91 HUMAN  | 13L312   | Protein disulfide-isomerase (Fragment)                       |
| 12664 | drfMS_041712_NAR_40mM_plus.10460.10460.2   | 2 | 8.91 | 0 | 9.40E-04       | (K)IGGG(R)K(G)G/E I/G E I/G P S(K)I                | 125.75 | 513.3081 | 1025.61  | -0.001  | -1.2 | 9.75 | 50482.3  | 6.31 HUMAN  | FB0804   | Elongation factor 1-alpha 1                                  |
| 12665 | drfMS_041712_NAR_40mM_plus2.17507.17507.3  | 3 | 8.91 | 0 | 2.47E-04       | (R)IGTDD(R)I(T)E/D/T/S P/H G I/P L/D(L)D R(I)      | 169.42 | 650.3372 | 1948.997 | -0.0004 | -0.2 | 4.22 | 35067    | 5.55 HUMAN  | E7E702   | RuvB-like 1                                                  |
| 12666 | drfMS_041712_NAR_40mM_plus2.6309.6309.2    | 2 | 8.91 | 0 | 5.99E-04       | (R)ISSSP(R)I(S)/S/S/S/F S(R)I                      | 96.4   | 435.7189 | 870.432  | -0.001  | -1.2 | 9.75 | 19288.4  | 10.19 HUMAN | F8VQY3   | Keratin, type II cytoskeletal 8 (Fragment)                   |
| 12667 | drfMS_041712_NAR_60mM_plus2.13996.13996.3  | 3 | 8.91 | 0 | 4.44E-05       | (K)IIVN(R)I(V)N/V N E A T G G K Y/V R(A)           | 140.13 | 547.2994 | 1639.88  | 0.0004  | 0.3  | 5.32 | 535136.6 | 6.01 HUMAN  | Q12434   | Cytoplasmic dymin 1 heavy chain 1                            |
| 12668 | drfMS_041712_NAR_60mM_plus2.7576.7576.3    | 3 | 8.91 | 0 | 8.16E-05       | (K)IIVN(R)I(V)N/V N E A T G G K Y/V R(A)           | 101.87 | 491.2171 | 1611.633 | 0.001   | 0.7  | 6.79 | 40918.6  | 6.07 HUMAN  | Q09866   | Neuroxin differentiation-associated protein ANNAK            |
| 12669 | drfMS_041712_NAR_60mM_plus2.2192.2192.3    | 3 | 8.91 | 1 | 1.34E-05       | (R)IKLAK(R)I(T)I/A E I/L A/E K L D N/M P L(R)S     | 175.47 | 604.996  | 1812.989 | -0.0045 | -2.5 | 4.68 | 23326.5  | 9.89 HUMAN  | CN247    | Non-POU domain-containing octamer-binding protein (Fragment) |
| 12670 | drfMS_041712_NAR_60mM_plus.9160.9160.3     | 3 | 8.91 | 0 | 1.59E-06       | (K)EHLN(R)K(F)H L M E I/S/G D/P S S(K)I            | 105.52 | 482.8882 | 1446.65  | 0.0005  | 0.3  | 4.65 | 30992.3  | 4.14 HUMAN  | B2RE88   | Protein SET                                                  |
| 12671 | drfMS_041712_NAR_20mM_minus.8930.8930.2    | 2 | 8.9  | 0 | 2.76E-05       | (R)IALG(R)I(L)G L/Q/N P T/A/E V/L/V H P(K)I        | 138.8  | 677.871  | 1354.733 | 0.0022  | 1.6  | 6.05 | 26991.7  | 5.01 HUMAN  | B7Z624   | Myosin light polypeptide 6                                   |
| 12672 | drfMS_041712_NAR_20mM_minus.14858.14858.2  | 2 | 8.9  | 0 | 2.65E-04       | (K)IGDPM(R)I(D)S/G I/G E I/G E I/G P S(K)I         | 138.72 | 625.7143 | 1932.026 | -0.0004 | -5.9 | 5.64 | 20760    | 6.24 HUMAN  | Q07460   | Catalyase/inductase lyase (Fragment)                         |
| 12673 | drfMS_041712_NAR_30mM_minus.15676.15676.2  | 2 | 8.9  | 0 | 2.34E-05 M213m | (R)IFLRF(R)I(F)I/E I/H M H E G V(K)I               | 138.42 | 633.8048 | 1234.559 | 32.0064 | 13.1 | 4.14 | 31077.7  | 6.05 HUMAN  | ADPF26.3 | Isoform 3 of Dehydrogenase/reductase SDR family member 12    |
| 12674 | drfMS_041712_NAR_40mM_minus.11814.11814.3  | 3 | 8.9  | 0 | 1.13E-05       | (R)IASTV(R)I(S)I/T L V L/H E Y/Q A A/V G A R(K)I   | 158.22 | 657.6842 | 1920.09  | 0.0086  | 4.4  | 5.32 | 71165.3  | 5.57 HUMAN  | 13K513   | Claflarin heavy chain 1                                      |
| 12675 | drfMS_041712_NAR_50mM_minus.11230.11230.3  | 3 | 8.9  | 1 | 1.29E-05       | (R)IIVN(R)I(V)N/V N E A T G G K Y/V R(A)           | 105.63 | 605.6545 | 1814.951 | -0.0018 | -1   | 8.75 | 73026.9  | 5.48 HUMAN  | P08107   | Heat shock 70 kDa protein 1A/1B                              |
| 12676 | drfMS_041712_NAR_50mM_minus.18104.18104.3  | 3 | 8.9  | 0 | 2.77E-05       | (R)IISD(R)I(S)I/L H D A/L C I/V I/L A/V T D(K)I    | 173.77 | 518.9488 | 1554.831 | 0.0001  | 0.6  | 6.46 | 57204.9  | 6.01 HUMAN  | FG2W65   | T-complex protein 1 subunit beta                             |
| 12677 | drfMS_041712_NAR_60mM_minus.17239.17239.3  | 3 | 8.9  | 1 | 3.68E-05       | (K)IIVN(R)I(V)N/V N E A T G G K Y/V R(A)           | 156.28 | 643.6095 | 1388.815 | -0.0006 | -0.6 | 8.5  | 21249.9  | 5.49 HUMAN  | EP9.37   | Calpain-1 catalytic subunit (Fragment)                       |
| 12678 | drfMS_041712_NAR_60mM_minus.8784.8784.3    | 3 | 8.9  | 1 | 5.81E-03       | (K)IQAGE(R)K(A)Q/V E/G L E G K/G V A(R)I           | 108.32 | 462.2579 | 1384.754 | 0.0048  | 3.5  | 6.19 | 53377.8  | 5.74 HUMAN  | Q15149   | Plectin                                                      |
| 12679 | drfMS_041712_NAR_120mM_plus.11045.11045.4  | 4 | 8.9  | 0 | 8.23E-05       | (R)IQAGP(R)I(G)A I/Q/V V T/H Q/H/S T R(R)I         | 111.1  | 465.7339 | 1859.915 | -0.0009 | -0.5 | 8.76 | 87447.6  | 6.44 HUMAN  | Q15437   | Protein transport protein Sec23B                             |
| 12680 | drfMS_041712_NAR_20mM_plus.18070.18070.2   | 2 | 8.9  | 0 | 1.74E-05       | (K)IIVN(R)I(V)N/V N E A T G G K Y/V R(A)           | 195.47 | 595.8558 | 1910.714 | -0.001  | -4.4 | 8.56 | 15978.4  | 10.84 HUMAN | PE2266   | Ubiquitin-like protein ligase 2                              |
| 12681 | drfMS_041712_NAR_30mM_plus2.12709.12709.2  | 2 | 8.9  | 0 | 3.39E-04       | (K)IIVN(R)I(V)N/V N E A T G G K Y/V R(A)           | 120    | 510.791  | 941.521  | -0.001  | -1.1 | 12.0 | 119.1    | 5.24 HUMAN  | Q52811   | Aspartylase-inducing factor 1, mitochondrial                 |
| 12682 | drfMS_041712_NAR_30mM_plus2.14373.14373.2  | 2 | 8.9  | 0 | 2.16E-05       | (K)IASGE(R)K(S)I/A E/G P/F P G R(I)C               | 127.67 | 595.2831 | 1135.553 | -0.0058 | -5.1 | 6.05 | 55373.1  | 7.25 HUMAN  | F5H0Y1   | Phenylalanine-ribona ligase subunit                          |
| 12683 | drfMS_041712_NAR_30mM_plus2.20228.20228.2  | 2 | 8.9  | 0 | 1.14E-05       | (K)IIVN(R)I(V)N/V N E A T G G K Y/V R(A)           | 159.72 | 604.8021 | 1208.595 | 0.0021  | 1.7  | 9.41 | 16192.1  | 5.1 HUMAN   | C1A029   | US small nuclear ribonucleoprotein 200 kDa helicase          |
| 12684 | drfMS_041712_NAR_40mM_plus2.13502.13502.3  | 3 | 8.9  | 0 | 1.42E-04       | (K)ITLVP(R)K(T)I/V E/P V P V L V/H P/S K(S)I       | 143.12 | 625.3454 | 1874.027 | -0.0053 | -2.8 | 4.75 | 81726.4  | 6.71 HUMAN  | Q9H307   | Pinin                                                        |
| 12685 | drfMS_041712_NAR_40mM_plus2.16818.16818.2  | 2 | 8.9  | 1 | 1.02E-05       | (R)IACTV(R)I(L)S/T G/V L/G E I/Y A/L N D G A R(K)I | 165.6  | 644.6797 | 1932.026 | -0.0008 | -3.5 | 6.18 | 67184.7  | 5.24 HUMAN  | Q52811   | Aspartylase-inducing factor 1, mitochondrial                 |
| 12686 | drfMS_041712_NAR_40mM_plus2.17460.17460.3  | 3 | 8.9  | 0 | 1.58E-05       | (R)IIVN(R)I(V)N/V N E A T G G K Y/V R(A)           | 169.33 | 601.3376 | 1801.996 | -0.0023 | -1.3 | 8.73 | 24482.9  | 7.96 HUMAN  | 81A1A0   | Phosphoribosyl pyrophosphate synthetase 1                    |
| 12687 | drfMS_041712_NAR_50mM_plus2.5578.5578.3    | 3 | 8.9  | 0 | 1.11E-05       | (K)ISYVG(R)K(D)S/Y/V I/G D/E/A/S Q/S K(S)I         | 90.6   | 452.2114 | 1354.623 | -0.0037 | -2.7 | 4.56 | 32616.5  | 5.18 HUMAN  | AN6L76   | Actin, alpha skeletal muscle                                 |
| 12688 | drfMS_041712_NAR_60mM_plus.13920.13920.3   | 3 | 8.9  | 0 | 9.60E-05       | (K)ITVYD(R)K(T)T/V K/D L S/E I/G/S V(R)I           | 129.52 | 468.928  | 1404.769 | -0.0034 | -2.4 | 5.74 | 33798.9  | 5.74 HUMAN  | Q15149   | Plectin                                                      |
| 12689 | drfMS_041712_NAR_60mM_plus.17551.17551.3   | 3 | 8.9  | 1 | 8.38E-05       | (R)IKDK(R)I(K)N L/R I/D E/V I/S/L R(I)I            | 148.42 | 440.2499 | 1318.737 | -0.0014 | -1   | 5.96 | 13787.9  | 10.17 HUMAN | PE2851   | 40S ribosomal protein S25                                    |
| 12690 | drfMS_041712_NAR_120mM_minus.16726.16726.3 | 3 | 8.9  | 0 | 4.41E-05       | (R)IISG(R)I(S)I/L V/H V Q/S E I/G                  |        |          |          |         |      |      |          |             |          |                                                              |

|       |                                            |   |      |   |          |                                                      |                            |        |          |          |         |       |      |          |             |            |                                                         |                            |
|-------|--------------------------------------------|---|------|---|----------|------------------------------------------------------|----------------------------|--------|----------|----------|---------|-------|------|----------|-------------|------------|---------------------------------------------------------|----------------------------|
| 12749 | dirMS_041712_NAR_50mM_plus2.9033.9033.3    | 3 | 8.87 | 1 | 3.78E+05 | (K)TAVCDIK(K)T A/V/C/D P P R G L K(M)                | C.Carbonmethylation        | 114.98 | 442.9121 | 1326.72  | 0.0019  | 1.4   | 8.41 | 501994   | 4.75 HUMAN  | ABNN2Z     | Tubulin beta-8 chain-like protein LOC260334             |                            |
| 12750 | dirMS_041712_NAR_50mM_plus2.9329.9329.3    | 3 | 8.87 | 0 | 1.13E+05 | (K)EITLTK(K)A/E/T/L/V/A/T/K F P(L K)                 |                            | 116.23 | 433.922  | 1299.572 | -0.0004 | -0.3  | 6.18 | 987617   | 5.56 HUMAN  | Q9UBF2     | Cramer subunit gamma-2                                  |                            |
| 12751 | dirMS_041712_NAR_50mM_plus2.14721.14721.3  | 3 | 8.87 | 1 | 5.31E+05 | (K)MKGQ(K)K(V)G/D/Q/E/Y/E D Y V I G(L R V)           |                            | 133.12 | 451.265  | 1378.52  | 0.0006  | 4.4   | 4.32 | 369127   | 6.4         | 5.58 HUMAN | EP920                                                   | Myosin light polypeptide 6 |
| 12752 | dirMS_041712_NAR_60mM_plus.16111.16111.3   | 3 | 8.87 | 1 | 5.67E+05 | (K)KIGDQ(K)R I K I G D L P/L D R T(R)                |                            | 141.5  | 457.295  | 1369.769 | -0.0004 | -3.4  | 4.56 | 473096   | 5.42 HUMAN  | BAD0Y7     | 4-oxo-1-aminobutyrate hydrolyase                        |                            |
| 12753 | dirMS_041712_NAR_60mM_plus.17184.17184.3   | 3 | 8.87 | 0 | 2.04E+05 | (K)IHTLQ(K)K)T)H/L/P G F V/E/Q/E A/L/K(A)            |                            | 147.35 | 513.942  | 1539.817 | -0.0015 | -1    | 5.37 | 223142   | 9.39 HUMAN  | P3004      | Peroxiredoxin-5, mitochondrial                          |                            |
| 12754 | dirMS_041712_NAR_120mM_minus.14751.14751.2 | 2 | 8.86 | 0 | 6.64E+05 | (R)HSLVSR(R)M)S/L/V/S V V V(R)                       |                            | 134.32 | 522.3023 | 1043.6   | -0.0023 | -2.2  | 9.75 | 365592   | 9.35 HUMAN  | Q9BU06     | Spinon-2                                                |                            |
| 12755 | dirMS_041712_NAR_20mM_plus.10334.10334.3   | 2 | 8.86 | 0 | 3.90E+05 | (R)ELDGR(R) L I Q E I V G A I D S L E L K E(L K)     |                            | 152.13 | 541.2755 | 1621.807 | 0.0052  | 2.9   | 4.25 | 265251   | 5.58 HUMAN  | EP920      | Fujipilin                                               |                            |
| 12756 | dirMS_041712_NAR_30mM_minus2.10817.10817.2 | 2 | 8.86 | 0 | 1.30E+06 | (R)IGVSTTTR(S)F S F T/T/T A T E(L)                   |                            | 111.8  | 566.7699 | 1313.527 | 0.0056  | 4.0   | 6    | 23001.9  | 5.28 HUMAN  | 3L1L19     | Actin, cytoplasmic 2, N-terminally processed (Fragment) |                            |
| 12757 | dirMS_041712_NAR_30mM_minus.16158.16158.2  | 2 | 8.86 | 1 | 1.55E+05 | (R)FVLSQAR(R) V L S V/A/A/K D E(L)                   |                            | 141.43 | 575.3113 | 1149.615 | 0.0003  | 0.3   | 4.37 | 41053.3  | 5.58 HUMAN  | Q86L0Y     | TNDC5 protein                                           |                            |
| 12758 | dirMS_041712_NAR_30mM_minus2.17028.17028.2 | 2 | 8.86 | 0 | 8.36E+03 | (K)FAGAE(K)R)A/E/A/E/A F P(R)                        |                            | 146.13 | 575.7971 | 1150.589 | -0.0027 | -1.9  | 4.53 | 582147   | 5.25 HUMAN  | BAD4E7     | T-complex protein 1 subunit theta                       |                            |
| 12759 | dirMS_041712_NAR_30mM_minus2.7259.7259.2   | 2 | 8.86 | 0 | 1.18E+05 | (K)MGAAG(K)M)Q/D/G/A/V(Q)E A/T(R)                    |                            | 94     | 537.257  | 1033.509 | -0.0029 | -2.7  | 5.75 | 531349   | 5.74 HUMAN  | Q13149     | Plectin                                                 |                            |
| 12760 | dirMS_041712_NAR_40mM_plus.15013.15013.3   | 3 | 8.86 | 0 | 1.44E+05 | (R)FVLFHTS(K)S/L/P/L/T A/E/V I G(L K)                |                            | 173.17 | 581.269  | 1740.968 | -0.0007 | -1.9  | 6.75 | 108105.4 | 6.57 HUMAN  | PT000      | Protein transport protein Sec24C                        |                            |
| 12761 | dirMS_041712_NAR_50mM_minus2.7187.7210.3   | 3 | 8.86 | 0 | 1.54E+05 | M37mM (K)M)VDP(K)M)A/V/D/P/V/P/E H G E M(K)F)        | m.Dead methylation         | 109.67 | 505.2416 | 1481.713 | 31.9975 | 5.1   | 4.05 | 90316.8  | 5.52 HUMAN  | Q13263     | Transcription intermediary factor 1-beta                |                            |
| 12762 | dirMS_041712_NAR_60mM_minus.11295.11295.3  | 3 | 8.86 | 1 | 7.95E+05 | (K)MKEIAE(K)M)E/A/E/A/V/L/G/T(K)                     |                            | 122.48 | 418.226  | 1252.661 | 0.0029  | 2.3   | 5.9  | 17973    | 5.16 HUMAN  | EP9165     | Heat shock cognate 71 kDa protein (Fragment)            |                            |
| 12763 | dirMS_041712_NAR_60mM_minus.13118.13118.3  | 3 | 8.86 | 1 | 9.28E+05 | M232mM (R)M)S)M(K)M)K E V D L D E I Q(L)M/V D Q(N K) | m.Dead methylation         | 128.87 | 647.0011 | 1921.897 | 15.9151 | -1.8  | 4.68 | 40069.4  | 4.83 HUMAN  | ET7ER1     | Tubulin beta chain                                      |                            |
| 12764 | dirMS_041712_NAR_20mM_plus.9803.9803.2     | 2 | 8.86 | 0 | 1.74E+04 | (R)IAGQNR(K)A L Q/N/P/T A E V(L V K)                 |                            | 140.02 | 573.546  | 1252.733 | 0.0006  | 0.5   | 6.05 | 26991.7  | 5.01 HUMAN  | 872624     | Myosin light polypeptide 6                              |                            |
| 12765 | dirMS_041712_NAR_50mM_plus2.21515.21513.3  | 3 | 8.86 | 0 | 1.01E+05 | (K)IHTPLA(K)T H L P L A(L)I)Q/T L L D Q(K)           |                            | 133.29 | 601.0191 | 1801.058 | -0.0154 | -8.6  | 6.41 | 22243.5  | 7.91 HUMAN  | EP9R8      | Sulfotransferase 1A2 (Fragment)                         |                            |
| 12766 | dirMS_041712_NAR_60mM_plus.10794.10794.3   | 3 | 8.86 | 1 | 2.00E+06 | (R)KLDPSG(R)K L D P P S G/E I Q(T)/V L V(R)          |                            | 114.85 | 524.9456 | 1572.823 | -0.0005 | -0.3  | 4.68 | 564911   | 7.78 HUMAN  | BAD7Q2     | Elongation factor 1-gamma                               |                            |
| 12767 | dirMS_041712_NAR_60mM_plus.13262.13262.3   | 3 | 8.86 | 1 | 1.19E+05 | (R)ISEASD(R)S E I A D S D N A T L E(L)I(L)           |                            | 126.82 | 554.615  | 1661.834 | -0.0036 | -2.2  | 4.32 | 334221.3 | 6.44 HUMAN  | P19524     | Desmoplamin                                             |                            |
| 12768 | dirMS_041712_NAR_60mM_plus.7069.7069.3     | 3 | 8.86 | 0 | 4.98E+05 | (R)KVSQNR(R)K)S/D N/V/D/L/E L E(K)                   |                            | 95.33  | 438.55   | 1313.633 | 0.0023  | 1.7   | 4.54 | 17952.8  | 6.73 HUMAN  | EP9AV2     | Proteasome subunit beta-type-5                          |                            |
| 12769 | dirMS_041712_NAR_20mM_minus.13745.13745.2  | 2 | 8.85 | 0 | 3.98E+05 | (K)IGSGM(K)S G A S V/S/L/E G V P(L V K)              |                            | 186.67 | 670.8912 | 1340.778 | -0.0033 | -2.4  | 6    | 22556    | 8.8 HUMAN   | EP9K25     | Cofilin-1                                               |                            |
| 12770 | dirMS_041712_NAR_30mM_minus.16214.16214.2  | 2 | 8.85 | 0 | 5.86E+05 | (R)DFLLA(N)R)F I)F L A N S A/S(R)                    |                            | 142.07 | 520.763  | 1040.516 | 0.0028  | 2.6   | 5.84 | 82516.1  | 5.49 HUMAN  | P07384     | Calpain-1 catalytic subunit                             |                            |
| 12771 | dirMS_041712_NAR_30mM_minus.18027.18027.3  | 3 | 8.85 | 0 | 6.94E+04 | (R)SSPVM(R)S F F Y N G L/W/L G Q G(K)                |                            | 152.48 | 490.2879 | 1470.759 | -0.0019 | -1.3  | 8.31 | 17630.6  | 11.62 HUMAN | 13L305     | Profilin-1 (Fragment)                                   |                            |
| 12772 | dirMS_041712_NAR_30mM_minus.18137.18137.2  | 2 | 8.85 | 0 | 8.93E+04 | (R)NIVVVS(R)N/V)N/L)S/L)G/L                          |                            | 152.87 | 479.7891 | 958.572  | -0.0011 | -1.2  | 8.75 | 14680.6  | 9.23 HUMAN  | ET6L18     | AP-1 complex subunit mu-2 (Fragment)                    |                            |
| 12773 | dirMS_041712_NAR_40mM_plus.14508.14508.3   | 3 | 8.85 | 0 | 1.74E+04 | (K)SICPPFK(K)S L C/P F K L E L Q/P G A(K)            | C.Carbonmethylation        | 170.4  | 633.3446 | 1958.024 | -0.0046 | -0.2  | 8.31 | 121895.3 | 7.06 HUMAN  | PT0114     | Bifunctional glutamate/proline-L-lysine ligase          |                            |
| 12774 | dirMS_041712_NAR_50mM_minus.14486.14486.3  | 3 | 8.85 | 0 | 1.56E+04 | (R)IDQVQ(R)D/Q/V)N/L/L/E L D Q A(P K)                |                            | 170.0  | 564.9709 | 1692.892 | 0.0066  | 3.9   | 4.54 | 44513    | 5.59 HUMAN  | BAD4HS     | COP9 signalosome complex subunit 2                      |                            |
| 12775 | dirMS_041712_NAR_50mM_minus.17717.17717.3  | 3 | 8.85 | 0 | 3.07E+05 | (R)IDQVQ(K)H N Q L P L V I I)E/F/T G D(P K)          |                            | 170.02 | 655.6843 | 1965.044 | -0.0057 | -2.9  | 5.4  | 51524.1  | 4.82 HUMAN  | FHSB12     | Protein disulfide-isomerase                             |                            |
| 12776 | dirMS_041712_NAR_50mM_plus.6663.6663.3     | 3 | 8.85 | 0 | 6.32E+04 | (R)IASQSR(K)A V I A/S Q/D S V D I A E R A E(K)F)     |                            | 105    | 581.9591 | 1741.851 | 0.012   | 6.9   | 4.32 | 81955.5  | 5.78 HUMAN  | EP9P76     | Pantheonate kinase 4                                    |                            |
| 12777 | dirMS_041712_NAR_50mM_plus.16306.16306.3   | 3 | 8.85 | 1 | 6.39E+05 | (R)KMGDQ(K)M)G/L P/D A/D V A I G(K)                  |                            | 151.21 | 633.965  | 1562.811 | -0.0022 | -1.8  | 4.56 | 47999.7  | 4.81 HUMAN  | ABU156     | Tubulin alpha-4b chain                                  |                            |
| 12778 | dirMS_041712_NAR_120mM_plus.7651.7651.2    | 2 | 8.85 | 0 | 4.88E+05 | (R)KSTWQ(K)S/T/T)T/G/L V L(K)                        |                            | 95.28  | 560.8014 | 1120.6   | 0.0027  | 3.7   | 8.34 | 12137.8  | 9.3 HUMAN   | APW80      | Elongation factor 1-alpha 3 (Fragment)                  |                            |
| 12779 | dirMS_041712_NAR_30mM_plus2.18972.19198.2  | 2 | 8.85 | 0 | 4.13E+04 | (K)IAVVMQ(K)A V)M/D/L/L(K)                           |                            | 153.57 | 458.761  | 916.528  | -0.0075 | -8.2  | 5.88 | 267260.7 | 5.95 HUMAN  | Q13085     | Acetyl-CoA carboxylase 1                                |                            |
| 12780 | dirMS_041712_NAR_30mM_plus2.4129.4129.2    | 2 | 8.85 | 0 | 1.20E+06 | M299mM (K)M)M)M(K)M)M)A I A C D I P(R)H)             | C.Carbonmethylation m.Dead | 69.07  | 549.2125 | 1065.427 | 31.9903 | 0.4   | 5.84 | 50199.4  | 4.75 HUMAN  | ABNN2Z     | Tubulin beta-8 chain-like protein LOC260334             |                            |
| 12781 | dirMS_041712_NAR_30mM_plus2.4200.4200.2    | 2 | 8.85 | 0 | 1.17E+06 | M299mM (K)M)M)M(K)M)M)A I A C D I P(R)H)             | C.Carbonmethylation m.Dead | 69.07  | 549.2125 | 1065.427 | 31.9903 | 0.4   | 5.84 | 50199.4  | 4.75 HUMAN  | ABNN2Z     | Tubulin beta-8 chain-like protein LOC260334             |                            |
| 12782 | dirMS_041712_NAR_30mM_plus2.5805.5805.2    | 2 | 8.85 | 0 | 6.55E+04 | (K)NITCSY(K)N T C/T S V Y T(K)                       | C.Carbonmethylation m.Dead | 84.92  | 537.2502 | 1073.493 | -0.0001 | -0.1  | 8.59 | 470342.8 | 6.83 HUMAN  | ET7L0Y     | DNA-dependent protein kinase catalytic subunit          |                            |
| 12783 | dirMS_041712_NAR_40mM_plus2.16142.16264.2  | 2 | 8.85 | 0 | 1.50E+05 | (R)TJTVAA(R)Y T)T)I)A/V/A F(R)G)                     |                            | 162.03 | 520.2997 | 1039.593 | -0.0014 | -1.3  | 8.75 | 40069.4  | 4.83 HUMAN  | ET7ER1     | Tubulin beta chain                                      |                            |
| 12784 | dirMS_041712_NAR_60mM_plus.11185.11185.3   | 3 | 8.85 | 0 | 3.61E+05 | (R)IIVGPN(R)K)A/V/K P G N V T Q/D)T A/W N(K)V)       |                            | 116.13 | 643.0009 | 1927.003 | 0.0011  | 3.1   | 8.59 | 31751.6  | 6.33 HUMAN  | BRW77      | Proliferation-associated protein 2G4                    |                            |
| 12785 | dirMS_041712_NAR_60mM_plus.16595.16595.3   | 3 | 8.85 | 1 | 5.78E+05 | (K)IAJVAE(K)A A)M/V)D)K D K D F Q(S)X(L)             |                            | 143.15 | 562.2762 | 1684.797 | 0.0175  | 10.4  | 4.56 | 65213.5  | 9.57 HUMAN  | BDQ700     | Ewing sarcoma breakpoint region 1                       |                            |
| 12786 | dirMS_041712_NAR_60mM_plus.18041.18041.3   | 3 | 8.85 | 1 | 4.02E+04 | (K)MFGDK(K)M)G/L P/D A/D V A I G(K)                  |                            | 152.52 | 621.6038 | 1562.811 | -0.0019 | -8.9  | 5.71 | 63448.4  | 6.4         | 5.78 HUMAN | BAD4E2                                                  | Transketolase              |
| 12787 | dirMS_041712_NAR_60mM_plus.20149.20149.3   | 3 | 8.85 | 1 | 1.54E+05 | (R)ELIKVLE(R)K L)M/V)E A/M Q/A I)N P(L K)            |                            | 165.17 | 603.6968 | 1809.012 | 0.0042  | 2.3   | 4.79 | 73202    | 9.19 HUMAN  | C9JM5U     | Probable ATP-dependent RNA helicase DXD17               |                            |
| 12788 | dirMS_041712_NAR_120mM_minus.16558.16558.4 | 4 | 8.84 | 0 | 4.90E+05 | (K)HLEINP(K)M L)E)M/V)H S I I)T R(L K)               |                            | 145.22 | 447.4904 | 1786.945 | -0.0049 | -2.7  | 5.27 | 85057.6  | 4.94 HUMAN  | PT0700     | Heat shock protein HSP 90-alpha                         |                            |
| 12789 | dirMS_041712_NAR_120mM_minus.8431.8431.2   | 2 | 8.84 | 0 | 5.91E+05 | (I)DLVGN(I)D I L D G N W R(I)                        |                            | 100.4  | 487.7332 | 974.469  | -0.0099 | -10.2 | 4.21 | 38133.9  | 4.64 HUMAN  | HT0226     | Bromodomain-containing protein 8 (Fragment)             |                            |
| 12790 | dirMS_041712_NAR_30mM_plus.11381.11391.2   | 2 | 8.84 | 0 | 1.45E+05 | (R)IIVVVS(R)N/V)N/L)S/L)G/L                          |                            | 115.12 | 633.965  | 1562.811 | -0.0022 | -1.6  | 4.57 | 49244.6  | 5.78 HUMAN  | EP9P76     | Tubulin alpha-4b chain                                  |                            |
| 12791 | dirMS_041712_NAR_40mM_plus2.14517.14517.3  | 3 | 8.84 | 0 | 2.26E+05 | (R)IDKPN(R)D I K F G N L V/D/P D T A V I L(K)        |                            | 169.68 | 631.6945 | 1893.069 | -0.0001 | -0.1  | 4.43 | 47257    | 9.38 HUMAN  | PH8481     | Ewing sarcoma kinase catalytic subunit                  |                            |
| 12792 | dirMS_041712_NAR_50mM_minus.10990.10990.3  | 3 | 8.84 | 1 | 4.01E+05 | (R)IIVVY(N)R)I N V I)Y)Y)N E A)T G G K V Y P(R)A)    |                            | 131.28 | 615.3184 | 1843.934 | 0.0069  | 3.8   | 8.43 | 50286.6  | 4.79 HUMAN  | P68371     | Tubulin beta-4b chain                                   |                            |
| 12793 | dirMS_041712_NAR_50mM_plus2.12885.12885.3  | 3 | 8.84 | 0 | 3.09E+05 | (K)EGDPT(K)G E K P T I V E/D)D/P I Q(L K)            |                            | 141.07 | 615.9772 | 1845.912 | 0.0054  | 2.9   | 4.08 | 29841.1  | 9.04 HUMAN  | Q79397     | DnaJ homolog subfamily C member 8                       |                            |
| 12794 | dirMS_041712_NAR_50mM_plus2.14858.14858.3  | 3 | 8.84 | 0 | 4.48E+05 | (R)KIGDQ(K)M)G/L P/D A/D V A I G(K)                  |                            | 153.03 | 646.6559 | 1937.956 | -0.0023 | -1.6  | 4.03 | 23493.8  | 5.54 HUMAN  | FRW713     | Protein disulfide-isomerase                             |                            |
| 12795 | dirMS_041712_NAR_50mM_plus2.15495.15495.3  | 3 | 8.84 | 1 | 2.25E+04 | (K)EGDQ(K)E F I Q D A V A L V E(L K)                 |                            | 166.05 | 579.2917 | 1279.847 | 0.014   | 8.1   | 4.68 | 61234.7  | 5.7 HUMAN   | P10809     | 60S ribosomal protein L30                               |                            |
| 12796 | dirMS_041712_NAR_50mM_plus2.16370.16370.3  | 3 | 8.84 | 0 | 4.08E+05 | (R)VLDPPT(R)R V L D/P)T T I K P L D R(K)             | C.Carbonmethylation        | 151.67 | 471.9411 | 1413.81  | -0.0013 | -0.9  | 5.93 | 63448.4  | 7.25 HUMAN  | BAD4E2     | Transketolase                                           |                            |
| 12797 | dirMS_041712_NAR_60mM_minus.11693.11693.3  | 3 | 8.84 | 1 | 4.83E+05 | M57m (K)IAVNR(K)M)A R N R A L G F/E)P N(K)           | m.Dead methylation         | 125.12 | 412.2311 | 1218.666 | 16.0124 | 14.2  | 8.72 | 19738.1  | 4.91 HUMAN  | P14208     | Centra-2                                                |                            |
| 12798 | dirMS_041712_NAR_60mM_plus.16796.16796.3   | 3 | 8.84 | 1 | 2.48E+05 | (K)IGVSEG(R)K F S G L W I/L)N/V)S/R(I)               |                            | 101.23 | 645.9986 | 1947.981 | 0.0017  | 10.1  | 4.79 | 23020.5  | 4.53 HUMAN  |            |                                                         |                            |

|       |                                           |   |      |   |                |                                                    |                     |        |          |          |         |       |      |          |       |       |        |                                                                              |
|-------|-------------------------------------------|---|------|---|----------------|----------------------------------------------------|---------------------|--------|----------|----------|---------|-------|------|----------|-------|-------|--------|------------------------------------------------------------------------------|
| 12858 | dirMS_041712_NAR_60mM_minus.9763.9763.3   | 3 | 8.81 | 1 | 1.01E+06       | (KITVQD)(K)AIV C D/P/P M G/K M)                    | C.CarbonMethylation | 114.77 | 442.9098 | 1326.72  | -0.005  | -3.8  | 8.41 | 50199.4  | 4.75  | HUMAN | ABN22Z | Tubulin beta-8 chain-like protein LOC260334                                  |
| 12859 | dirMS_041712_NAR_20mM_plus.15281.15281.2  | 2 | 8.81 | 0 | 7.05E+03       | (KIVLSV)(K) V U/S/V/A S S D N R(Q)                 |                     | 176.72 | 655.3293 | 1309.638 | 0.031   | 10    | 4.21 | 33029.4  | 9.62  | HUMAN | D6R610 | Guanine nucleotide-binding protein subunit beta-2-like 1 (Fragment)          |
| 12860 | dirMS_041712_NAR_20mM_plus.16210.16210.2  | 2 | 8.81 | 0 | 8.34E+04       | (RIVANL)(R) L N L V/S/R/T)                         |                     | 101.4  | 451.7354 | 906.459  | 0.003   | -3.3  | 8.8  | 2275.1   | 8.72  | HUMAN | BT274  | T-complex protein 1 subunit delta                                            |
| 12861 | dirMS_041712_NAR_20mM_plus.7337.7337.2    | 2 | 8.81 | 0 | 2.01E+05       | (KDVLSV)(K) V L/U/S/E E A R L)                     |                     | 119.8  | 567.7865 | 1134.564 | 0.002   | 1.8   | 4.25 | 33940.9  | 9.27  | HUMAN | F5H008 | Lactate dehydrogenase                                                        |
| 12862 | dirMS_041712_NAR_30mM_plus2.18763.18763.2 | 2 | 8.81 | 0 | 2.71E+05       | (R)QFLTQ)(R) F/L/T/Q/L/M Q/R)                      |                     | 151.42 | 568.8061 | 1136.613 | -0.0083 | -7.3  | 8.75 | 81733.5  | 5.24  | HUMAN | EPW411 | Splicing factor 3A subunit 1                                                 |
| 12863 | dirMS_041712_NAR_30mM_plus2.21577.21577.2 | 2 | 8.81 | 0 | 3.32E+05       | (K)FDGLG)(K) T(D)G/L/V/M Y P R(I)                  |                     | 167.47 | 620.3199 | 1239.619 | 0.0135  | -10.9 | 8.83 | 32905.8  | 5.88  | HUMAN | C9H19  | Cathepsin D light chain (Fragment)                                           |
| 12864 | dirMS_041712_NAR_40mM_plus2.7024.7024.2   | 2 | 8.81 | 0 | 5.18E+04       | (R)SYDPP)(R) Y S/D/P/L K(E)                        |                     | 101.4  | 451.7354 | 906.459  | 0.003   | -7.5  | 5.55 | 46215.4  | 5.38  | HUMAN | PS2597 | Heterogeneous nuclear ribonucleon protein F                                  |
| 12865 | dirMS_041712_NAR_50mM_plus2.10307.10307.3 | 3 | 8.81 | 1 | 2.13E+05       | (R)TGKUG)(R) T/L/K/G S G T E V E I G               |                     | 118.55 | 501.6143 | 1502.842 | -0.041  | -9.4  | 5.81 | 30947.9  | 6.47  | HUMAN | H3BQ34 | Pyruvate kinase                                                              |
| 12866 | dirMS_041712_NAR_50mM_plus2.16148.16148.3 | 3 | 8.81 | 1 | 1.29E+06       | (K)GADVF)(K) G A/D/V/L/T E V E I G G S G S K(G)    |                     | 152.28 | 636.6618 | 1907.971 | -0.0001 | 0     | 4.68 | 30947.9  | 6.47  | HUMAN | H3BQ34 | Pyruvate kinase                                                              |
| 12867 | dirMS_041712_NAR_50mM_plus2.16978.16978.3 | 3 | 8.81 | 1 | 4.54E+05       | (K)VLDSGA)(K) V/L/D S/G A/P I P P G P E T L R)     |                     | 156.95 | 640.3623 | 1919.096 | -0.0237 | -12.3 | 6.04 | 53307.5  | 5.25  | HUMAN | FBV19V | ATP synthase subunit beta                                                    |
| 12868 | dirMS_041712_NAR_50mM_plus2.5212.5212.3   | 3 | 8.81 | 0 | 2.68E+05 M21m  | (R)SGSDH)(R) S G S m D P S G A/H/V S V R(Q)        | m.Dead              | 186.63 | 647.5461 | 1384.627 | 0.1596  | -1    | 6.46 | 48340.6  | 8.84  | HUMAN | Q07566 | Kir domain-containing, RNA-binding, signal transduction-associated protein 1 |
| 12869 | dirMS_041712_NAR_50mM_plus2.7715.7715.3   | 3 | 8.81 | 1 | 9.24E+04       | (R)FNSVAV)(R) F/V/A A G V/D Q A R(Q)               |                     | 162.95 | 543.261  | 1027.723 | -0.0203 | -1.4  | 4.68 | 14236.2  | 16.2  | HUMAN | Q12175 | Peptidyl-prolyl cis-trans isomerase NIMA-interacting 1                       |
| 12870 | dirMS_041712_NAR_60mM_plus.10846.10846.3  | 3 | 8.81 | 1 | 6.35E+05       | (R)IAVEDR)(R) A V/D E R F/P G C M Q G(RT)          | C.CarbonMethylation | 114.63 | 508.237  | 1522.689 | 0.0075  | 4.9   | 6.12 | 56522.6  | 6.66  | HUMAN | 84D7W3 | Phosphoenolpyruvate carboxykinase (GTP), mitochondrial                       |
| 12871 | dirMS_041712_NAR_60mM_plus.13921.13921.3  | 3 | 8.81 | 1 | 9.47E+05       | (K)ITTVKDL)(K) T T/V/K L S/E I L V G S V R(Q)      |                     | 129.53 | 468.9268 | 1044.769 | -0.0034 | -2.4  | 5.74 | 533778   | 5.74  | HUMAN | Q15149 | Plectin                                                                      |
| 12872 | dirMS_041712_NAR_60mM_plus.14722.14722.3  | 3 | 8.81 | 1 | 5.21E+05       | (K)NKQDK)(K) K D/Q D G V Y/E I D/V I V G L R(Q)    |                     | 133.53 | 596.2816 | 1786.824 | 0.006   | 3.4   | 4.32 | 26991.7  | 5.01  | HUMAN | 17Z024 | Myosin light polypeptide 6                                                   |
| 12873 | dirMS_041712_NAR_60mM_plus.16400.16400.3  | 3 | 8.81 | 0 | 7.55E+05       | (K)SPFQTK)(S) P/Y/Q/L/F/T/H L V K(T)               |                     | 142.53 | 485.7005 | 1462.717 | 0.0017  | 1.2   | 5.3  | 25381.9  | 10.49 | HUMAN | EP9027 | 45S ribosomal protein S2                                                     |
| 12874 | dirMS_041712_NAR_120mM_minus.9732.9732.3  | 3 | 8.8  | 0 | 4.13E+05       | (K)NCPH)(K) N C P H I/V V G P P R(Q)               | C.CarbonMethylation | 107.6  | 436.2293 | 1306.669 | 0.0049  | 3.7   | 9.75 | 28185.1  | 10.76 | HUMAN | 84D016 | Spliceosome RNA helicase DDX39B                                              |
| 12875 | dirMS_041712_NAR_20mM_minus.8523.8578.2   | 2 | 8.8  | 0 | 2.54E+05       | (K)ITAPALV)(K) I T A P A L V S K(K)                |                     | 135.52 | 450.2808 | 899.556  | -0.0017 | -1.9  | 8.41 | 21077    | 9.05  | HUMAN | K7EM90 | Alpha-enolase (Fragment)                                                     |
| 12876 | dirMS_041712_NAR_20mM_minus.8748.8748.2   | 2 | 8.8  | 0 | 2.15E+04       | (K)VAGQD)(K) A I G D/G V/S V/D F R(Q)              |                     | 136.87 | 617.823  | 1234.643 | -0.0039 | -3.2  | 5.81 | 17127.4  | 10.05 | HUMAN | ABM127 | Small ubiquitin-related modifier 3                                           |
| 12877 | dirMS_041712_NAR_30mM_minus.17301.17301.2 | 2 | 8.8  | 0 | 9.97E+04       | (R)ILWLV)(R) L N L V/S/R/T)                        |                     | 152.05 | 451.2694 | 901.525  | 0.0061  | 6.8   | 9.75 | 59791    | 9.93  | HUMAN | EP9014 | Ladim-1                                                                      |
| 12878 | dirMS_041712_NAR_30mM_minus.9463.9415.2   | 2 | 8.8  | 0 | 1.50E+06       | (R)ILWAVE)(R) L A/V A/G E D A R(Q)                 |                     | 105.8  | 451.242  | 901.474  | 0.003   | 3.3   | 4.37 | 74559.4  | 5.04  | HUMAN | 83K574 | Coronin                                                                      |
| 12879 | dirMS_041712_NAR_30mM_minus.9422.9423.2   | 2 | 8.8  | 0 | 2.50E+05       | (R)EGLEND)(R) E G L E/N/D A G S(K)                 |                     | 105.3  | 459.2338 | 917.457  | 0.0029  | 3.1   | 4.14 | 96649    | 6.13  | HUMAN | QBUMU4 | Programmed cell death 6-interacting protein                                  |
| 12880 | dirMS_041712_NAR_40mM_minus.9520.9520.3   | 3 | 8.8  | 0 | 2.03E+04       | (R)IPPEK)(R) P P S E K P S S T L Q Y F P(K)S)      |                     | 138.47 | 612.3231 | 1834.995 | -0.0132 | -7.2  | 8.5  | 78759    | 9.49  | HUMAN | EP9100 | B-cell CLL/lymphoma 9-like protein (Fragment)                                |
| 12881 | dirMS_041712_NAR_50mM_minus.13349.13349.3 | 3 | 8.8  | 1 | 1.91E+05       | (K)ITPLEVE)(K) I T V L E V P S D T E N V K A(K)    |                     | 144.63 | 662.0226 | 1969.059 | -0.006  | -3.1  | 4.41 | 17271.6  | 6.75  | HUMAN | 84D012 | Ubiquitin                                                                    |
| 12882 | dirMS_041712_NAR_50mM_minus.14485.14485.3 | 3 | 8.8  | 0 | 1.55E+04       | (R)IDGK)(R) D G L Q/V N/L E L G H Q(K)             |                     | 150.7  | 564.9709 | 1692.892 | 0.006   | 3.9   | 4.54 | 44513    | 5.59  | HUMAN | 84D045 | COPS signalosome complex subunit 2                                           |
| 12883 | dirMS_041712_NAR_50mM_minus.15672.15672.3 | 3 | 8.8  | 0 | 2.54E+05 M460m | (R)SIEHNR)(R) S I E V N N T L D L Q/L S H K(Q)     | m.Dead              | 157.28 | 648.6635 | 1927.979 | 0.15966 | 0.9   | 4.65 | 80254.2  | 5.05  | HUMAN | DP6PK4 | Alpha actinin 4 short isoform                                                |
| 12884 | dirMS_041712_NAR_50mM_minus.6751.6751.3   | 3 | 8.8  | 1 | 8.76E+04 M22m  | (K)ILAEAG)(K) I L A E/A L E R Y D D i m A C m K(S) | m.Dead              | 104.8  | 645.2741 | 1901.819 | 31.9887 | -0.6  | 4.32 | 5919.6   | 4.73  | HUMAN | ESR6E1 | 14-3-3 protein zeta/delta (Fragment)                                         |
| 12885 | dirMS_041712_NAR_60mM_minus.19789.19897.3 | 3 | 8.8  | 1 | 1.81E+06       | (K)EIDVLD)(K) I V/D L V/L D R I R(Q)               |                     | 179.88 | 652.2799 | 1354.805 | 0.0219  | 1.4   | 4.56 | 58642    | 4.95  | HUMAN | F5H053 | Tubulin alpha-1C chain                                                       |
| 12886 | dirMS_041712_NAR_60mM_minus.8011.8011.3   | 3 | 8.8  | 1 | 8.24E+05       | (R)ILVLR)(R) L V L R D L V L V L V L V Q(T)        |                     | 148.68 | 617.2001 | 1849.893 | 0.0016  | -1.2  | 4.68 | 10243.4  | 6.88  | HUMAN | ABM518 | Debrin                                                                       |
| 12887 | dirMS_041712_NAR_60mM_minus.8221.8221.3   | 3 | 8.8  | 0 | 1.27E+04 M354m | (K)ILSNRP)(R) L S N R P A/P M S/P S G R(M)         | m.Dead              | 105.97 | 443.2488 | 1461.727 | 15.9911 | -1.2  | 9.16 | 107710.1 | 5.38  | HUMAN | 877116 | Actinin alpha 1 isoform 3                                                    |
| 12888 | dirMS_041712_NAR_20mM_minus.16896.16896.2 | 2 | 8.8  | 0 | 1.89E+05       | (K)ILGGAV)(K) G G S A V/S/L G G K P(L)             |                     | 107.6  | 670.8917 | 1340.778 | -0.0023 | -1.7  | 6    | 22956    | 8.88  | HUMAN | EP9K25 | Cofilin-1                                                                    |
| 12889 | dirMS_041712_NAR_20mM_minus.7761.7761.2   | 2 | 8.8  | 0 | 1.95E+05       | (R)ILALAN)(R) L A I N A/S L A G V P(K)             | C.CarbonMethylation | 173.27 | 566.7967 | 1132.578 | 0.0082  | 7.2   | 8.8  | 13951.6  | 9.48  | HUMAN | H38R88 | Fructose-bisphosphate aldolase A (Fragment)                                  |
| 12890 | dirMS_041712_NAR_20mM_minus.97907.97907.2 | 2 | 8.8  | 0 | 2.39E+05       | (K)ILSGG)(K) L S G G L V L S V S G(K)              |                     | 121.65 | 478.3363 | 1193.621 | -0.005  | -3.7  | 5.8  | 19349    | 6.17  | HUMAN | CTP171 | Propionyl-CoA carboxylase beta chain, mitochondrial                          |
| 12891 | dirMS_041712_NAR_30mM_plus2.16950.16950.2 | 2 | 8.8  | 0 | 3.50E+05       | (K)ISNQLV)(K) S N Q/Q L V/D I E I K V(K)           | C.CarbonMethylation | 143.35 | 643.8504 | 1286.695 | -0.0015 | -1.2  | 4.37 | 22568.6  | 6.35  | HUMAN | 83K025 | Proteasome activator complex subunit 3                                       |
| 12892 | dirMS_041712_NAR_30mM_plus2.21497.21497.2 | 2 | 8.8  | 0 | 8.15E+03       | (R)IVNQA)(R) V N Q/A W/L L T G C A(G/E)            |                     | 167.75 | 751.3976 | 1501.794 | -0.0065 | -4.3  | 9.27 | 23047.2  | 9.95  | HUMAN | P46782 | 40S ribosomal protein S5                                                     |
| 12893 | dirMS_041712_NAR_30mM_plus2.7647.7706.2   | 2 | 8.8  | 0 | 1.34E+06       | (R)ISYSDP)(R) S P S D S T A T P/V/A E Q I E(N)     |                     | 93.45  | 453.7343 | 906.457  | 0.006   | 5.1   | 5.55 | 46013.4  | 5.38  | HUMAN | PS2597 | Heterogeneous nuclear ribonucleon protein F                                  |
| 12894 | dirMS_041712_NAR_30mM_plus2.20667.20667.3 | 3 | 8.8  | 1 | 2.19E+05       | (K)IKVPEPT)(K) K I P E D T I L I V/D M L T V R(Q)  |                     | 177.23 | 630.524  | 1888.929 | -0.006  | -3.2  | 6.04 | 4763.2   | 6.29  | HUMAN | Q9H465 | Salic acid synthase                                                          |
| 12895 | dirMS_041712_NAR_60mM_plus.5675.5675.3    | 3 | 8.8  | 1 | 1.53E+05 M131m | (R)IDGQSP)(R) I D G L Q/V N L E L G H Q(K)         | C.CarbonMethylation | 147.98 | 499.8988 | 1481.662 | 0.15926 | -1.6  | 8.59 | 32421.3  | 6.44  | HUMAN | PI5204 | Deimosin-1                                                                   |
| 12896 | dirMS_041712_NAR_20mM_minus.8684.8684.3   | 3 | 8.79 | 0 | 6.96E+04       | (R)SPDSS)(R) S P S D S T A T P/V/A E Q I E(N)      |                     | 136.63 | 621.2935 | 1861.877 | -0.0114 | -6.1  | 4.14 | 76925.9  | 4.46  | HUMAN | ABM5V8 | Debrin                                                                       |
| 12897 | dirMS_041712_NAR_20mM_plus.14324.14324.2  | 2 | 8.79 | 0 | 8.58E+04       | (R)IFSVGL)(R) F I S V G L V S T G L K(Q)           |                     | 170.27 | 54.3224  | 1107.641 | -0.0043 | -3    | 8.72 | 96306.4  | 6.41  | HUMAN | P13639 | Elongation factor 2                                                          |
| 12898 | dirMS_041712_NAR_20mM_plus.16205.16205.3  | 3 | 8.79 | 0 | 1.08E+06 M221m | (R)ITLVP)(R) L T V P E L T Q/Q V I D R A(N)        | m.Dead              | 184.28 | 569.9583 | 1691.867 | 15.9911 | -1.1  | 4.37 | 42831.5  | 4.86  | HUMAN | AK854  | UGT39S34, isoform CRA_1                                                      |
| 12899 | dirMS_041712_NAR_20mM_plus.16311.16311.2  | 2 | 8.79 | 0 | 1.11E+05       | (K)ITDTP)(K) I T D I P D L V L V L V L V Q(T)      |                     | 111.6  | 474.3121 | 1119.371 | -0.005  | -2.1  | 2.2  | 2222     | 6.13  | HUMAN | BT274  | T-complex protein 1 subunit delta                                            |
| 12900 | dirMS_041712_NAR_20mM_plus.17579.17579.3  | 3 | 8.79 | 0 | 1.96E+05       | (K)ILYDF)(K) Y S I E L I U D Q/V F V I T G R(Q)    |                     | 115.97 | 637.9537 | 1750.892 | 0.0006  | 0.4   | 4.14 | 213097.1 | 5.83  | HUMAN | AS45E0 | POTE arginine-methyle transferase F                                          |
| 12901 | dirMS_041712_NAR_20mM_plus.6876.6876.2    | 2 | 8.79 | 0 | 4.12E+05 M132m | (R)IDMVG)(R) I D M V G I I A T T G S S R(K)        | m.Dead              | 112.87 | 590.2864 | 1163.573 | 15.993  | -1.6  | 5.84 | 73202    | 9.19  | HUMAN | C3M105 | Probable ATP-dependent RNA helicase DDX17                                    |
| 12902 | dirMS_041712_NAR_20mM_plus.9964.9964.2    | 2 | 8.79 | 0 | 1.64E+05       | (K)IQAVTA)(K) Q I A V T A T T G S S R(K)           |                     | 139.78 | 626.8223 | 1252.642 | -0.0046 | -3.7  | 4.53 | 23633.9  | 11.02 | HUMAN | P40429 | 60S ribosomal protein L13a                                                   |
| 12903 | dirMS_041712_NAR_20mM_plus.19306.19306.2  | 2 | 8.79 | 0 | 1.87E+05       | (K)ILNSG)(R) L N S G L I L V L V L V L V Q(T)      |                     | 152.8  | 570.3123 | 1139.621 | -0.0034 | -3    | 8.75 | 95441.7  | 5.22  | HUMAN | 872463 | Paromycin-sensitive aminopeptidase                                           |
| 12904 | dirMS_041712_NAR_40mM_plus.6993.6993.2    | 2 | 8.79 | 0 | 1.27E+05       | (R)IMSPV)(R) M S P V V M D R(Q)                    |                     | 100.62 | 403.1892 | 805.337  | 0.0016  | 2     | 5.59 | 77999.9  | 9.09  | HUMAN | PS2272 | Heterogeneous nuclear ribonucleon protein M                                  |
| 12905 | dirMS_041712_NAR_40mM_plus2.8042.8042.2   | 2 | 8.79 | 0 | 3.33E+04       | (R)ISGGAR)(R) S G Q/G A I G M C R(G)               |                     | 107.53 | 592.7523 | 1184.494 | 0.0038  | 3.2   | 9.47 | 18988.7  | 11.2  | HUMAN | H38T97 | 60S ribosomal protein L4 (Fragment)                                          |
| 12906 | dirMS_041712_NAR_50mM_plus.15193.15193.3  | 3 | 8.79 | 0 | 2.43E+04       | (K)ILALLLV)(K) A V L L V L D Q G S P M A A A N(K)  |                     | 143.75 | 558.9877 | 1674.954 | -0.0052 | -3.1  | 6.71 | 4822683  | 6.07  | HUMAN | Q12355 | Ankyrin-3                                                                    |
| 12907 | dirMS_041712_NAR_50mM_plus.17044.17       |   |      |   |                |                                                    |                     |        |          |          |         |       |      |          |       |       |        |                                                                              |







|       |                                            |   |      |           |                                                        |        |          |          |         |       |      |          |             |        |                                                         |
|-------|--------------------------------------------|---|------|-----------|--------------------------------------------------------|--------|----------|----------|---------|-------|------|----------|-------------|--------|---------------------------------------------------------|
| 13294 | dirMS_041712_NAR_60mM_minus.11883.11883.3  | 3 | 8.62 | 0.192E+05 | (RIHLGLG(R) L/N/L V/Q/V/E/G P(KT)                      | 126.37 | 402.2384 | 1204.705 | -0.0042 | -3.5  | 6.75 | 99028.8  | 5.83 HUMAN  | O9Y678 | Coatomer subunit gamma-1                                |
| 13295 | dirMS_041712_NAR_60mM_plus.9095.9095.3     | 3 | 8.62 | 1.162E+05 | M232m (R)MSmK(R)M/S m K E V D E/Q(V) L/N/V(D)W(K)R     | 102.57 | 652.6318 | 1923.897 | 0.0038  | -3.2  | 4.68 | 40069.4  | 4.83 HUMAN  | FEVW1  | Tubulin beta chain                                      |
| 13296 | dirMS_041712_NAR_120mM_plus.5542.5542.1    | 1 | 8.62 | 1.189E+05 | (R)SGGQ(R)G/S G/LV/A/G/V/G G V G G Y G Q(R)G           | 81.35  | 515.5513 | 1544.562 | -0.0009 | -4.1  | 5.15 | 21649.9  | 5.15 HUMAN  | PTA2   | TATA-binding protein associated factor 2N (Fragment)    |
| 13297 | dirMS_041712_NAR_20mM_plus.15950.15963.2   | 2 | 8.62 | 0.317E+05 | M81m (K)SFPVEE(K)S F/Y P E/V/S/G m V L T(K)M           | 181.02 | 816.8988 | 1616.788 | 16.0027 | -4.8  | 4.53 | 17973    | 6.15 HUMAN  | EPN65  | Heat shock cognate 71 kDa protein (Fragment)            |
| 13298 | dirMS_041712_NAR_30mM_plus2.20205.20205.2  | 2 | 8.62 | 0.113E+05 | (K)TNVAL(K)K T N/V/A/L/M/C M L R(E)                    | 159.65 | 604.8021 | 1208.595 | 0.0021  | 1.7   | 9.41 | 71929.1  | 5.1 HUMAN   | C3A09  | US 5 small nuclear ribonucleoprotein 200 kDa helicase   |
| 13299 | dirMS_041712_NAR_30mM_plus2.7929.7929.2    | 2 | 8.62 | 0.220E+05 | (K)IAVAA(G) K(A)I/V/A/A/N(C N Y K)                     | 96.05  | 569.2909 | 1137.572 | 0.0016  | 1.4   | 8.59 | 31075.7  | 5.65 HUMAN  | PE0174 | Triosephosphate isomerase                               |
| 13300 | dirMS_041712_NAR_30mM_plus2.8737.8737.2    | 2 | 8.62 | 0.143E+06 | (R)FGGQ(R)G/G V/G/G/V/G G V G G G Q P(G)               | 98.27  | 447.8738 | 1241.656 | -0.0014 | -1    | 9.75 | 76292.2  | 9.53 HUMAN  | 2232.2 | Sulfonylesterase                                        |
| 13301 | dirMS_041712_NAR_40mM_plus2.11918.11918.2  | 2 | 8.62 | 0.927E+04 | (R)NFDEL(R)N F(A)E(L)R(V)                              | 136.5  | 453.7354 | 906.468  | -0.0044 | -4.9  | 4.37 | 25148.6  | 6 HUMAN     | F3D01  | Peroxiredoxin-6                                         |
| 13302 | dirMS_041712_NAR_50mM_plus2.16250.16250.3  | 3 | 8.62 | 0.289E+05 | (K)ACQSY(F)K(A)C/Q/S I/Y P L/D/V D F V R(K)            | 154.4  | 568.9562 | 1704.853 | 0.0014  | 0.8   | 7.99 | 16650    | 6.8 HUMAN   | D6R986 | 40S ribosomal protein S3a                               |
| 13303 | dirMS_041712_NAR_50mM_plus2.17020.17020.3  | 3 | 8.62 | 1.371E+05 | (K)SKNEV(K) L S K N E V L M V I N V G S I S T G G R(V) | 157    | 659.0229 | 1975.064 | -0.0029 | -5    | 8.75 | 51099.4  | 8.43 HUMAN  | FRW810 | Uncharacterized protein                                 |
| 13304 | dirMS_041712_NAR_50mM_plus2.17963.18027.3  | 3 | 8.62 | 1.239E+05 | (R)IGLV(D)R(I)G/G/D/V/V/V/T L S G T R P F L S R(G)     | 162.87 | 592.331  | 1774.981 | -0.0026 | -1.4  | 9.6  | 23556.9  | 9.94 HUMAN  | Q3T0F0 | Carcin-related nucleoside-triphosphatase                |
| 13305 | dirMS_041712_NAR_50mM_plus2.8948.8948.3    | 3 | 8.62 | 0.640E+04 | (R)AAALMS(K)A A L A H S E I V G A A P A F(K)T          | 113.75 | 4.8      | 1788.931 | -0.0001 | 1.7   | 4.4  | 23949    | 4.54 HUMAN  | FR16   | Plectin (Fragment)                                      |
| 13306 | dirMS_041712_NAR_60mM_plus.18004.18004.3   | 3 | 8.62 | 1.230E+05 | (R)YRYPQ(R) R Y R P D V L V I V D P P I A R(L)         | 150.93 | 560.9839 | 1680.943 | -0.006  | -3.6  | 5.96 | 96499.9  | 5.43 HUMAN  | FSH6X6 | Neutral alpha-glucosidase AB                            |
| 13307 | dirMS_041712_NAR_120mM_minus.11036.11036.3 | 3 | 8.61 | 0.583E+05 | (R)IGLHDSI(R)G L/H/Q/S V/L/E/E/R(A)                    | 114.27 | 405.8796 | 1215.612 | 0.0126  | 10.4  | 5.4  | 81007.1  | 6.31 HUMAN  | EP9V1V | Plectin (Fragment)                                      |
| 13308 | dirMS_041712_NAR_20mM_minus.14654.14654.2  | 2 | 8.61 | 0.883E+04 | (R)HTTGP(R) H T L T L T P T N A I F K(A)               | 201.33 | 694.9107 | 1388.815 | -0.0007 | -6.5  | 8.75 | 38010.7  | 6.67 HUMAN  | Q13565 | Poly(C)-binding protein 1                               |
| 13309 | dirMS_041712_NAR_30mM_minus.10685.10689.2  | 2 | 8.61 | 0.106E+05 | M95m (R)SLGQ(V)R L S I L Y P V A M R(Q)                | 112.02 | 495.1801 | 981.519  | 15.9575 | -7.4  | 8.75 | 26516.1  | 5.68 HUMAN  | EP9P10 | Epiplectin                                              |
| 13310 | dirMS_041712_NAR_30mM_minus.11591.11591.2  | 2 | 8.61 | 0.158E+05 | (R)ITPCEK(R)I/T P C E L N A I L V R(K)                 | 118.02 | 544.7899 | 1088.566 | -0.0069 | -6.3  | 4.53 | 83264.1  | 6.04 HUMAN  | EPH15A | Filamin-A                                               |
| 13311 | dirMS_041712_NAR_30mM_minus.15298.15298.2  | 2 | 8.61 | 0.642E+05 | (R)YPVNS(R)R Y/P/V/M/S N I L K(A)                      | 136.8  | 573.8282 | 1146.652 | -0.0026 | -2.3  | 8.59 | 44227.3  | 7.81 HUMAN  | ETQ06E | T-complex protein 1 subunit alpha                       |
| 13312 | dirMS_041712_NAR_40mM_minus.8134.8134.3    | 3 | 8.61 | 0.118E+04 | M33m (R)VITDEE(R) L/T/E/D E/M G/H P/E/G D A I A R(L)   | 127.97 | 656.9824 | 1952.938 | 15.9944 | -0.2  | 4.17 | 40874    | 5.06 HUMAN  | EP9C9  | Farnesyl pyrophosphatase synthase                       |
| 13313 | dirMS_041712_NAR_50mM_minus.15930.15930.3  | 3 | 8.61 | 1.821E+04 | (K)DANAK(K)D A N V A K S E U F E I A I Q R(Q)          | 158.97 | 543.6248 | 1628.86  | -0.0004 | -0.2  | 4.68 | 56077.4  | 5.37 HUMAN  | FRV84  | Keratin, type II cytoskeletal 8                         |
| 13314 | dirMS_041712_NAR_60mM_minus.13527.13527.3  | 3 | 8.61 | 1.116E+05 | M160m (K)FQFDQ(K)F R D U L M V N I V A L S L K(L)      | 135.43 | 599.9744 | 1781.921 | 15.9872 | -4.3  | 8.75 | 57204.9  | 6.01 HUMAN  | FGW6F6 | T-complex protein 1 subunit beta                        |
| 13315 | dirMS_041712_NAR_60mM_minus.16215.16215.3  | 3 | 8.61 | 1.568E+05 | (K)KLKLSV(L)K L S I V P P A T T R(K)                   | 150.5  | 478.2883 | 1432.852 | -0.0019 | -1.3  | 9.99 | 25148.6  | 6 HUMAN     | P30041 | Peroxiredoxin-6                                         |
| 13316 | dirMS_041712_NAR_20mM_plus.12172.12172.2   | 2 | 8.61 | 0.146E+04 | M66m (R)IGGQ(V)R G G V G G I G F P A M R(Q)            | 156.62 | 553.7889 | 1090.571 | 15.9991 | 3.8   | 8.75 | 19338.9  | 5.33 HUMAN  | ETQ039 | tRNA-spicin ligase RtcB homolog                         |
| 13317 | dirMS_041712_NAR_20mM_plus.18746.18746.2   | 2 | 8.61 | 0.232E+05 | (R)ITLGG(R) L T V L G W F T N A I F K(A)               | 200.97 | 679.9039 | 1354.804 | -0.0037 | -2.7  | 8.75 | 26261    | 8.75 HUMAN  | BADL0L | Poly(C)-binding protein 2                               |
| 13318 | dirMS_041712_NAR_20mM_plus.7399.7399.2     | 2 | 8.61 | 0.816E+04 | (K)KQVSK(K)S N V I S D A V G Q S T R(I)                | 116.4  | 437.8019 | 1224.602 | -0.0057 | -4.6  | 5.55 | 31075.7  | 5.65 HUMAN  | EP9P14 | Triosephosphate isomerase                               |
| 13319 | dirMS_041712_NAR_20mM_plus.7916.7916.2     | 2 | 8.61 | 0.359E+05 | M233m (K)EVEQD(K)E V/D E/Q/M L N V I D N K(N)          | 124.95 | 731.8435 | 1446.689 | 15.9994 | -3.1  | 4.14 | 40069.4  | 4.83 HUMAN  | FEVW1  | Tubulin beta chain                                      |
| 13320 | dirMS_041712_NAR_30mM_plus2.12524.12524.2  | 2 | 8.61 | 0.256E+05 | (R)NSCSF(R)N C/S/S/L/R(L)                              | 118.62 | 474.6699 | 968.487  | -0.0005 | -0.5  | 8.75 | 7945.1   | 11.03 HUMAN | CN380  | 60S ribosomal protein L28                               |
| 13321 | dirMS_041712_NAR_30mM_plus2.14546.14546.2  | 2 | 8.61 | 0.361E+05 | (R)ELAFD(K) L A F A L V S I R(K)                       | 128    | 468.2629 | 935.52   | -0.0011 | -1.2  | 6.1  | 30944.2  | 6.52 HUMAN  | Q1201  | ATP-dependent RNA helicase GDX39A                       |
| 13322 | dirMS_041712_NAR_30mM_plus2.14132.14132.2  | 2 | 8.61 | 0.142E+05 | M29m (R)KQVSK(K)S N V I S D A V G Q S T R(I)           | 116.4  | 437.8019 | 1224.602 | -0.0057 | -4.6  | 5.55 | 31075.7  | 5.65 HUMAN  | EP9P14 | Triosephosphate isomerase                               |
| 13323 | dirMS_041712_NAR_50mM_plus2.18948.18948.3  | 3 | 8.61 | 1.279E+05 | (K)LAJFQ(K)K I/L A F Q G L K E V V D R(A)              | 167.97 | 520.3109 | 1558.895 | -0.004  | -2.6  | 6.07 | 26616.1  | 5.68 HUMAN  | EP9P10 | Epiplectin                                              |
| 13324 | dirMS_041712_NAR_50mM_plus2.6587.6587.3    | 3 | 8.61 | 4.18E+04  | (R)ITAEPP(R) A/E/E I P P K E A P E 2 T D A R(K)        | 99.48  | 622.6353 | 1865.888 | 0.0038  | 2.8   | 4.26 | 84217.8  | 4.29 HUMAN  | Q43719 | Hiv Tat-specific factor 1                               |
| 13325 | dirMS_041712_NAR_50mM_plus2.7375.7375.3    | 3 | 8.61 | 0.694E+04 | (K)ITTA P V P(K) T I A P V P P T K P G D I P R(K)      | 104.75 | 521.6042 | 1562.817 | -0.0193 | -12.3 | 5.74 | 109165.8 | 8.64 HUMAN  | ETRE53 | Zinc finger CCH domain-containing protein 18            |
| 13326 | dirMS_041712_NAR_50mM_plus.8754.8754.3     | 3 | 8.61 | 1.199E+05 | (K)KQPT(K)R L S I V P P A T T R(K)                     | 150.8  | 478.2883 | 1432.852 | -0.0019 | -1.3  | 9.99 | 25148.6  | 6 HUMAN     | EP9P14 | Triosephosphate isomerase                               |
| 13327 | dirMS_041712_NAR_60mM_plus.11469.11469.3   | 3 | 8.61 | 1.122E+06 | (R)IGAKSEK(K)G A S K E L I S E V E L R(N)              | 161.8  | 493.9069 | 1317.701 | 0.0053  | 4     | 4.79 | 56186.7  | 5.47 HUMAN  | BADU8R | T-complex protein 1 subunit gamma                       |
| 13328 | dirMS_041712_NAR_60mM_plus.17354.17354.3   | 3 | 8.61 | 0.175E+04 | (R)YSHSL(R)Y S H S L L V P L R(K)                      | 147.6  | 433.2569 | 1297.763 | -0.0065 | -5    | 8.75 | 60871.9  | 6.3 HUMAN   | BADJ93 | Phosphoribosylformylglycinamide cyclo-ligase            |
| 13329 | dirMS_041712_NAR_60mM_plus.8112.8112.3     | 3 | 8.61 | 1.693E+05 | (K)ALSRD(K)K A L V S R E M Q I V E V Q S S R(S)        | 100.48 | 550.2735 | 1648.807 | -0.0012 | -0.7  | 6.19 | 37486.1  | 9.03 HUMAN  | P22626 | Heterogeneous nuclear ribonucleoproteins A2/B1          |
| 13330 | dirMS_041712_NAR_60mM_plus.8734.8734.3     | 3 | 8.61 | 1.399E+04 | (R)ILREED(R)K L E V P D S K L K I G R(K)               | 105.8  | 401.8861 | 1203.647 | -0.0003 | -2.5  | 4.41 | 25834.8  | 9.54 HUMAN  | Q9C17  | Colicid-cold domain-containing protein 124              |
| 13331 | dirMS_041712_NAR_120mM_minus.16672.16672.3 | 3 | 8.6  | 0.308E+05 | (R)KILFEM(K) L E I N P Q H I S L V L R(Q)              | 146.27 | 596.3176 | 1796.945 | -0.0064 | -3.6  | 5.27 | 85957.6  | 6.44 HUMAN  | PT9200 | Heat shock protein 90 $\alpha$ isoform 1                |
| 13332 | dirMS_041712_NAR_30mM_minus.12743.12743.2  | 2 | 8.6  | 0.237E+05 | (R)IGCYD(R) E G I Y F D E L M N R(I)                   | 122.97 | 660.7538 | 1320.498 | 0.0002  | 1.5   | 4.14 | 26616.1  | 5.68 HUMAN  | EP9P10 | Epiplectin                                              |
| 13333 | dirMS_041712_NAR_30mM_minus.17352.17352.2  | 2 | 8.6  | 0.279E+05 | (K)FEDENI(K) E I D E V M F L K(H)                      | 148.07 | 577.7894 | 1154.573 | -0.0013 | -1.1  | 4.14 | 13378.8  | 6.27 HUMAN  | C3J557 | Peptidyl-prolyl cis-trans isomerase                     |
| 13334 | dirMS_041712_NAR_30mM_minus.18804.18804.2  | 2 | 8.6  | 0.173E+05 | (R)IANGSI(R)A I I G I I I G A V L R V(L)               | 157.37 | 516.8122 | 1032.62  | -0.0029 | -2.8  | 8.79 | 9731     | 5.19 HUMAN  | EP9W7  | Acetyl-CoA carboxylase 2                                |
| 13335 | dirMS_041712_NAR_30mM_minus.10712.10712.2  | 2 | 8.6  | 0.198E+05 | (R)DQVQ(R)D L S I V P P A T T R(K)                     | 146.93 | 518.3929 | 1584.489 | -0.0005 | -0.1  | 5.84 | 29164.2  | 5.27 HUMAN  | EP9P14 | Proliferating cell nuclear antigen                      |
| 13336 | dirMS_041712_NAR_50mM_minus.10497.10497.3  | 3 | 8.6  | 0.290E+05 | M35m (K)DANAK(K)A A S D V A M T A L P P T H F I R(L)   | 127.85 | 612.6486 | 1819.937 | 15.9942 | 0.4   | 5.32 | 12926.1  | 4.4 HUMAN   | ETQ039 | 14-3-3 protein epsilon (Fragment)                       |
| 13337 | dirMS_041712_NAR_50mM_minus.13499.13499.3  | 3 | 8.6  | 1.172E+05 | (R)ILAKLP(R)R I/A/L K I P D D A V P(KT)                | 145.38 | 450.9732 | 1350.799 | -0.0007 | -0.7  | 5.96 | 26413    | 9.18 HUMAN  | BIAP96 | 6-phosphofructokinase type C (Fragment)                 |
| 13338 | dirMS_041712_NAR_50mM_minus.10058.10058.3  | 3 | 8.6  | 1.194E+05 | (R)IEVGGD(R)R V/E/V G K D P E F T V D R(G)             | 115.57 | 543.6051 | 1622.802 | -0.0013 | -0.8  | 4.32 | 285219.5 | 5.48 HUMAN  | ETRE95 | Filamin-B                                               |
| 13339 | dirMS_041712_NAR_50mM_minus.3370.9370.3    | 3 | 8.6  | 1.446E+05 | (R)ISQD(K)K S V I L Q I Q D Q L A V E E R(A)           | 112    | 586.9696 | 1770.899 | -0.0038 | -2.2  | 4.32 | 13017.8  | 4.4 HUMAN   | KTQ2H1 | Uncharacterized protein 603A3                           |
| 13340 | dirMS_041712_NAR_60mM_plus.9741.9741.3     | 3 | 8.6  | 4.56E+04  | (K)ITATVCM(R)R T A V C D P P R K G R(K)                | 112.72 | 442.9098 | 1336.72  | -0.005  | -3.8  | 8.41 | 50199.4  | 4.75 HUMAN  | K6NNZ2 | Tubulin beta-3 chain-like protein LOC200334             |
| 13341 | dirMS_041712_NAR_120mM_plus.10681.10681.3  | 3 | 8.6  | 0.941E+05 | (R)YDYSR(R)Y I/D/S R/P G G Y G V R(S)                  | 108.63 | 577.5892 | 1730.756 | -0.0027 | -1.6  | 8.38 | 17170.1  | 8.86 HUMAN  | P98179 | Putative RNA-binding protein                            |
| 13342 | dirMS_041712_NAR_120mM_plus.15132.15132.4  | 4 | 8.6  | 1.45E+06  | (R)YRPPD(R)R K P A P D I T F S F S E A L L R(K)        | 133.42 | 472.7599 | 1888.017 | 0.0003  | 0.2   | 6.15 | 43289.6  | 5.19 HUMAN  | Q12905 | Interleukin enhancer-binding factor 2                   |
| 13343 | dirMS_041712_NAR_120mM_plus.4152.4152.3    | 3 | 8.6  | 1.198E+06 | M54m (K)SDSDE(K)S I L S I V P P A T T R(K)             | 70.17  | 427.2032 | 1203.16  | 15.9953 | 0.3   | 4.68 | 26419.2  | 5.1 HUMAN   | EP9Y87 | Splicing factor, proline- and glutamine-rich (Fragment) |
| 13344 | dirMS_041712_NAR_20mM_plus.19132.1913.2    | 2 | 8.6  | 0.941E+05 | (R)ISLQ(V)R L L I L F L T P R(K)                       | 202.32 | 516.7952 | 1502.589 | -0.0001 | -0.1  | 5.84 | 29164.2  | 5.27 HUMAN  | EP9P14 | Triosephosphate isomerase                               |
| 13345 | dirMS_041712_NAR_30mM_plus2.15380.15380.2  | 2 | 8.6  | 0.268E+05 | (R)ILCNFM(K) L N C L N F M R(K)                        | 132.98 | 477.2409 | 953.407  | 0.0005  | 0.2   | 9.75 | 18685.5  | 9.45 HUMAN  | B4DEV8 | Proteasome subunit alpha type                           |
| 13346 | dirMS_041712_NAR_30mM_plus2.20169.20169.2  | 2 | 8.6  | 0.122E+04 | (R)JALDTM(R)A L/D/T M M F D V I G(V)                   | 159.3  | 633.8135 | 1266.64  | 0.0     |       |      |          |             |        |                                                         |

|       |                                           |   |      |   |          |                                                          |        |          |          |           |       |      |          |       |       |        |                                                        |
|-------|-------------------------------------------|---|------|---|----------|----------------------------------------------------------|--------|----------|----------|-----------|-------|------|----------|-------|-------|--------|--------------------------------------------------------|
| 13403 | dirMS_041712_NAR_30mM_minus12582.15282.2  | 2 | 8.57 | 0 | 6.32E-05 | (R)YPPNSV(R)VPV)N V S N K(K)                             | 136.78 | 573.8282 | 1146.652 | -0.0026   | -2.3  | 8.59 | 4427.37  | 7.81  | HUMAN | ETC086 | T-complex protein 1 subunit alpha                      |
| 13404 | dirMS_041712_NAR_30mM_minus2734.7334.2    | 2 | 8.57 | 0 | 1.61E-05 | (R)ADAGC(R)A Q I A)G C V P S P F M Q L E L E R(M)        | 96.8   | 480.2603 | 959.527  | -0.1135   | -14.1 | 9.79 | 38843.2  | 6.48  | HUMAN | Q969E9 | Protein HT12 homolog                                   |
| 13405 | dirMS_041712_NAR_30mM_minus13726.17214.3  | 3 | 8.57 | 0 | 1.32E-05 | (R)AVAGD(R)V A L A)G C V P S P F M Q L E L E R(M)        | 141.87 | 724.1941 | 1341.187 | -0.0019   | -3.2  | 5.84 | 17499.2  | 6.18  | HUMAN | Q9H466 | Selenocysteine lyase (Fragment)                        |
| 13406 | dirMS_041712_NAR_30mM_minus12174.12174.3  | 3 | 8.57 | 0 | 1.03E-06 | M144m (R)JAGQPK(R)A G K P P V(C)A Q T V E L M S(K)K(K)   | 139.93 | 636.917  | 1876.969 | -0.1915   | -0.7  | 8.64 | 18464.1  | 7.18  | HUMAN | H3BSU3 | Pyruvate kinase (Fragment)                             |
| 13407 | dirMS_041712_NAR_30mM_minus13512.13512.3  | 3 | 8.57 | 1 | 1.88E-05 | (R)IAKPD(R)R L A)K V L P D D P I P K(T)                  | 145.48 | 450.9376 | 1350.799 | -0.0009   | -0.7  | 5.96 | 26413    | 9.18  | HUMAN | BIAPP6 | 6-phosphofruktokinase type C (Fragment)                |
| 13408 | dirMS_041712_NAR_50mM_minus7878.7878.3    | 3 | 8.57 | 1 | 1.50E-05 | (R)ITAVCQ(K)T A)I V C D P P P R G L K(M)                 | 111.93 | 442.9126 | 1326.72  | 0.0034    | 2.6   | 8.41 | 50199.4  | 4.75  | HUMAN | ABN222 | Tubulin beta-4 chain-like protein LOC260334            |
| 13409 | dirMS_041712_NAR_50mM_minus1336.1336.3    | 3 | 8.57 | 0 | 4.40E-04 | M247m (R)ADAGEC(R)A Q I A)G C V P S P F M Q L E L E R(M) | 121.08 | 518.3893 | 1838.554 | -0.1001   | -3.3  | 6.18 | 32009    | 6.18  | HUMAN | Q22214 | Pyridoxal kinase                                       |
| 13410 | dirMS_041712_NAR_60mM_minus8668.8668.3    | 3 | 8.57 | 0 | 2.74E-05 | (R)IAHQDHT(R)T A Q G H T T V D L A R L(R)                | 107.93 | 470.9153 | 1410.734 | -0.0022   | -1.6  | 5.32 | 533778   | 5.74  | HUMAN | Q15149 | Plectin                                                |
| 13411 | dirMS_041712_NAR_120mM_plus5971.5971.4    | 4 | 8.57 | 2 | 5.37E-05 | (R)KTGGAQ(R)K T A Q V G G V S Y T A A N K N(K)G          | 83.92  | 450.4826 | 1798.908 | 0.0003    | 0.2   | 9.83 | 11447.2  | 9.81  | HUMAN | C9JF97 | Cytochrome c (Fragment)                                |
| 13412 | dirMS_041712_NAR_120mM_plus7581.7581.2    | 2 | 8.57 | 1 | 1.19E-06 | (R)IAQYDE(R)Q A Q I D E A R L(K)                         | 93.32  | 547.2874 | 1093.564 | 0.0039    | 3.5   | 6.11 | 43773.3  | 5.26  | HUMAN | F8VZ19 | Keratin, type I cytoskeletal L8                        |
| 13413 | dirMS_041712_NAR_120mM_plus8134.8134.3    | 3 | 8.57 | 0 | 7.47E-05 | (R)FLPHAK(R)F P M H V A N C L V Q P(R)H                  | 96.6   | 452.5653 | 1355.681 | -0.0001   | -0.1  | 6.75 | 87537    | 9.67  | HUMAN | Q29446 | Palpokin-3                                             |
| 13414 | dirMS_041712_NAR_30mM_plus22247.2247.2    | 2 | 8.57 | 0 | 1.80E-04 | (R)IDAVL(R)Q D V L A)G C V P S P F M Q L E L E R(M)      | 177.12 | 471.3007 | 941.601  | -0.0045   | -4.7  | 5.84 | 114668.7 | 6.2   | HUMAN | F8VZ19 | Ubiquitin-associated protein 2-like                    |
| 13415 | dirMS_041712_NAR_30mM_plus2960.9690.2     | 2 | 8.57 | 0 | 7.42E-05 | (R)KEAFSE(K)E A E/S/S/P P V E(R)E(L)                     | 105.1  | 575.7726 | 1150.337 | 0.0004    | 0.4   | 4.25 | 92752.5  | 4.76  | HUMAN | PI4625 | Endoplasmic                                            |
| 13416 | dirMS_041712_NAR_50mM_plus211311.11311.3  | 3 | 8.57 | 1 | 3.48E-05 | (R)KIDFPPYE(K)Q L F P V E/S/E/S E(R)E(L)                 | 127.05 | 462.2257 | 1384.663 | -0.0005   | -0.4  | 4.1  | 23020.5  | 4.53  | HUMAN | AK8K00 | Hepatoma-derived growth factor                         |
| 13417 | dirMS_041712_NAR_50mM_plus213181.13181.3  | 3 | 8.57 | 1 | 1.00E-06 | (R)KASJAE(K)K A S I L A)T D T A L T E V A(K)I            | 137.4  | 530.2925 | 1588.799 | -0.0163   | -10.2 | 4.68 | 65077.2  | 5.47  | HUMAN | BTZ185 | V-type proton ATPase catalytic subunit A               |
| 13418 | dirMS_041712_NAR_50mM_plus2704.7044.3     | 3 | 8.57 | 0 | 1.68E-05 | (R)SGSOSI(R)S G S G S G L D V K P T A S P Q E R(S)       | 103.85 | 634.007  | 1901.92  | -0.0016   | -0.8  | 4.68 | 22779.5  | 12.08 | HUMAN | IL3L16 | Sarinvir lagovine repetitive matrix protein 2          |
| 13419 | dirMS_041712_NAR_50mM_plus2902.9072.3     | 3 | 8.57 | 1 | 3.16E-05 | (R)GSLQSK(R)K L V L Q S K Q Q V T A G N A R(K)           | 114.58 | 562.315  | 1684.934 | -0.0036   | -2.1  | 8.72 | 46335.4  | 6.29  | HUMAN | EP9851 | Phosphoribosylaminimidazole carboxylase (Fragment)     |
| 13420 | dirMS_041712_NAR_60mM_plus20830.20830.3   | 3 | 8.57 | 1 | 1.40E-05 | (R)KTYVNTI(K)T F V N I)T P A E V G V L V G K D(R)S       | 159.05 | 639.0248 | 1915.065 | -0.0049   | -2.6  | 5.74 | 17630.6  | 11.62 | HUMAN | IL3L05 | Profilin-1 (Fragment)                                  |
| 13421 | dirMS_041712_NAR_60mM_plus21607.21613.3   | 3 | 8.57 | 1 | 7.08E-05 | (R)KEIOLVU(K)E H I)D V L D R I)M(K)                      | 180.73 | 452.2733 | 1354.805 | 0.0001    | 0.1   | 4.56 | 58642    | 4.95  | HUMAN | F5HS03 | Tubulin alpha-1C chain                                 |
| 13422 | dirMS_041712_NAR_60mM_plus3367.3367.2     | 2 | 8.57 | 0 | 1.98E-06 | (R)IGAEVY(R)I G A E) V Y F M L(K)N                       | 107.55 | 572.3143 | 1143.616 | 0.0056    | 4.9   | 6.75 | 21077    | 9.05  | HUMAN | Q7E49D | Alpha-enolase (Fragment)                               |
| 13423 | dirMS_041712_NAR_120mM_minus11035.11166.3 | 3 | 8.57 | 0 | 5.83E-05 | (R)IGLHSH(R)E L H Q G S I E E F R(A)                     | 114.27 | 405.8796 | 1215.612 | 0.0126    | 10.4  | 5.4  | 81007.1  | 6.31  | HUMAN | EP9MV1 | Plectin (Fragment)                                     |
| 13424 | dirMS_041712_NAR_120mM_minus16877.16877.3 | 3 | 8.57 | 1 | 5.46E-05 | S155s (R)JVSVEG(R)S V S E G S F L A V M K(R)L            | 146.88 | 462.5714 | 1305.753 | 79.9471   | -13.9 | 8.75 | 40893.7  | 6.84  | HUMAN | Q6ZC33 | RNA-binding protein 43                                 |
| 13425 | dirMS_041712_NAR_20mM_minus8526.8526.2    | 2 | 8.56 | 0 | 1.29E-04 | (R)YIEETE(R)R V)E E T F T V T(K)S                        | 131.38 | 617.3246 | 1341.642 | -0.0001   | -0.1  | 4.09 | 54214.9  | 5.66  | HUMAN | C9J813 | Caldesmon (Fragment)                                   |
| 13426 | dirMS_041712_NAR_20mM_minus14636.14636.2  | 2 | 8.56 | 0 | 1.89E-05 | (R)KJWFYF(K)W I)W F E S I)M(K)                           | 133.52 | 556.2765 | 1105.422 | -0.0137   | -12.4 | 6    | 22427.6  | 6.68  | HUMAN | BM5DC1 | Uncharacterized protein (Fragment)                     |
| 13427 | dirMS_041712_NAR_30mM_minus16675.16675.2  | 2 | 8.56 | 0 | 2.24E-04 | (R)SGGGPK(R)S E I G G F W M A C(K)                       | 141.03 | 577.7702 | 1154.533 | 0.0002    | 2.8   | 5.72 | 46943.7  | 6.54  | HUMAN | Q9H466 | Isoctate dehydrogenase [NADP] cytoplasmic              |
| 13428 | dirMS_041712_NAR_30mM_minus216723.16723.2 | 2 | 8.56 | 0 | 2.30E-05 | (R)KINAGM(K)M A)A G L D L U L(K)E                        | 144.35 | 493.2881 | 985.568  | 0.0013    | 1.3   | 5.84 | 13786.8  | 9.33  | HUMAN | B7Z451 | Transcription elongation factor A protein 1            |
| 13429 | dirMS_041712_NAR_40mM_minus13089.13089.3  | 3 | 8.56 | 1 | 7.25E-04 | (R)ITVTVEY(R)T V T V T E I V G V D V I V G L(R)          | 160.8  | 534.3113 | 1600.927 | -0.0075   | -4.7  | 6.04 | 139883.7 | 8.06  | HUMAN | PS6211 | Cotamer subunit alpha                                  |
| 13430 | dirMS_041712_NAR_50mM_minus10341.10341.3  | 3 | 8.56 | 0 | 7.23E-04 | (R)ITSPVRS(R)T I P S P V S V T H D I T R(M)              | 127.37 | 480.6    | 1439.785 | -0.0029   | -0.1  | 6.74 | 58760.2  | 5.26  | HUMAN | Q62776 | Ankyrin repeat domain-containing protein 13D           |
| 13431 | dirMS_041712_NAR_50mM_minus1701.1701.3    | 3 | 8.56 | 0 | 2.33E-05 | (R)KJLWVY(R)F V I G G L S P P V E R(K)T                  | 146.73 | 548.9819 | 1461.947 | -0.0011   | -0.2  | 4.68 | 36669    | 4.68  | HUMAN | Q9H466 | V-type proton ATPase subunit B, brain isoform          |
| 13432 | dirMS_041712_NAR_50mM_minus17521.17521.3  | 3 | 8.56 | 0 | 4.20E-05 | (R)KIVHALA(K)M A H A L A E L G V M V A C U G E K(L)      | 168.05 | 603.3247 | 1807.974 | -0.0139   | -7.7  | 5.4  | 31075.7  | 5.65  | HUMAN | PT2793 | Triosephosphate isomerase                              |
| 13433 | dirMS_041712_NAR_60mM_minus15640.15640.3  | 3 | 8.56 | 1 | 5.80E-05 | M81m (R)KEVNVK(K)E V N K F Q M A Y S N L R E(R)A         | 146.75 | 576.9619 | 1712.879 | 15.9923   | -1.5  | 8.69 | 14683.8  | 10.19 | HUMAN | PS3708 | Signal recognition particle 14 kDa protein             |
| 13434 | dirMS_041712_NAR_60mM_minus15627.15627.3  | 3 | 8.56 | 1 | 3.64E-05 | (R)KAMLQZ(K)M A L V Q D I Q)N T D F L N(L)R              | 147.98 | 666.6911 | 1998.061 | -0.0027   | -1.3  | 4.56 | 22783.5  | 5.5   | HUMAN | PS3579 | Myosin-9                                               |
| 13435 | dirMS_041712_NAR_60mM_minus15668.15668.3  | 3 | 8.56 | 1 | 1.97E-05 | (R)KQ723E(K)S E A S E A N V R N R T(K)                   | 140.07 | 521.2855 | 1564.961 | -0.0027   | -2.2  | 4.68 | 36669    | 4.68  | HUMAN | Q9H466 | Heat shock protein HSP 90-beta                         |
| 13436 | dirMS_041712_NAR_120mM_plus11000.11000.3  | 3 | 8.56 | 0 | 1.35E-06 | (R)GSAVHC(R)S A N V A H Q S L E S(K)                     | 110.93 | 442.5657 | 1325.681 | 0.0017    | 1.3   | 5.4  | 558007.1 | 5.44  | HUMAN | PS5077 | Epiplexin                                              |
| 13437 | dirMS_041712_NAR_20mM_plus10427.10427.2   | 2 | 8.56 | 0 | 1.08E-05 | (R)KJVSQSP(K)Q V I)S D P S G L G P E(R)S                 | 144.47 | 677.8458 | 1354.696 | -0.0118   | -8.7  | 4.37 | 73399.3  | 6.86  | HUMAN | Q92945 | Far upstream element-binding protein 2                 |
| 13438 | dirMS_041712_NAR_20mM_plus14669.14669.2   | 2 | 8.56 | 0 | 3.89E-04 | M185m (R)KILAVNM(K)A V N M)P P R(K)                      | 172.75 | 580.3169 | 1143.634 | 15.9922   | -2.3  | 9.75 | 42230.8  | 4.77  | HUMAN | ABN228 | Putative tubulin beta chain-like protein ENSP000290377 |
| 13439 | dirMS_041712_NAR_20mM_plus8873.8873.2     | 2 | 8.56 | 0 | 9.68E-05 | M235m (R)KFLPALP(K)E T A L V A)P V S M(K)I               | 132.4  | 589.309  | 1163.618 | 15.9923   | -2.2  | 6.1  | 32616.5  | 5.18  | HUMAN | ABN176 | Actin, alpha skeletal muscle                           |
| 13440 | dirMS_041712_NAR_30mM_plus2424.2424.2     | 2 | 8.56 | 0 | 5.38E-05 | M355m (R)KIMGNM(R)M A N R L E R(K)                       | 70.05  | 460.7158 | 904.431  | 15.9928   | -1.2  | 5.75 | 77799.2  | 9.09  | HUMAN | PS2772 | Heterogeneous nuclear ribonucleoprotein M              |
| 13441 | dirMS_041712_NAR_30mM_plus2593.5935.2     | 2 | 8.56 | 0 | 3.25E-04 | (R)ILMGSS(R)E I E G S G D G S V Q R(T)                   | 85.37  | 645.797  | 1290.592 | -0.0053   | -4.1  | 4.14 | 44954.5  | 8.44  | HUMAN | AK8K23 | 26S protease regulatory subunit 8                      |
| 13442 | dirMS_041712_NAR_40mM_plus210966.10966.3  | 3 | 8.56 | 1 | 9.41E-04 | T1551t (R)IMARILR(K)M A R L L Q D V D V T A(K)           | 130.8  | 612.652  | 1632.863 | 2033.0789 | -0.2  | 4.56 | 211740   | 6.46  | HUMAN | F8V524 | Plexin-A1                                              |
| 13443 | dirMS_041712_NAR_50mM_plus212269.12269.3  | 3 | 8.56 | 1 | 2.80E-05 | (R)ISDPVU(R)S V D P V L Q T E T E Y E V T(K)T            | 132.68 | 584.2981 | 1750.874 | 0.0052    | 3     | 4.25 | 18909    | 6.21  | HUMAN | Q9E9F8 | UPP0556 protein C13orf10                               |
| 13444 | dirMS_041712_NAR_50mM_plus1331.1331.3     | 3 | 8.56 | 0 | 2.15E-05 | (R)ISCTNM(R)S G T V S V P R R(K)                         | 138.4  | 614.9436 | 1749.012 | -0.0013   | -0.7  | 6.02 | 21423    | 6.02  | HUMAN | Q9H466 | Nuclear receptor coactivator 5                         |
| 13445 | dirMS_041712_NAR_50mM_plus215025.15025.3  | 3 | 8.56 | 1 | 3.98E-05 | (R)KILVAK(K)M V A)N V D D L D R I)M(K)                   | 147.17 | 483.2728 | 1447.79  | 0.0135    | 9.3   | 4.3  | 124217.1 | 8.81  | HUMAN | Q14776 | Transcription elongation regulator 1                   |
| 13446 | dirMS_041712_NAR_50mM_plus26750.6750.3    | 3 | 8.56 | 1 | 5.64E-05 | (R)KJIVADK(K)M V I)A D Q Y S V T A N S(K)I               | 101    | 504.2628 | 1510.775 | -0.0009   | -0.6  | 5.96 | 25455.8  | 5.52  | HUMAN | ABM500 | L-lactate dehydrogenase (Fragment)                     |
| 13447 | dirMS_041712_NAR_50mM_plus27705.7705.3    | 3 | 8.56 | 0 | 5.89E-04 | M144m (R)KGLSSD(K)G L I S S D K P M V N N V D(K)         | 106.45 | 511.9224 | 1517.763 | 15.9988   | -3.3  | 5.96 | 24161.9  | 5.27  | HUMAN | F8VZ09 | SAP domain-containing ribonucleoprotein                |
| 13448 | dirMS_041712_NAR_50mM_plus15668.15668.3   | 3 | 8.56 | 1 | 1.59E-05 | (R)KQPSNR(K)D V S F V R R(K)                             | 138.48 | 443.5704 | 1229.696 | 0.0006    | 0.5   | 8.75 | 32124.1  | 7.56  | HUMAN | Q92479 | Putative ribonucleo-protein 1                          |
| 13449 | dirMS_041712_NAR_120mM_minus5184.5184.3   | 3 | 8.55 | 0 | 3.17E-05 | (R)KJIAETTE(R)R A E T E)G G T Q G Q R(Q)                 | 81.13  | 482.2432 | 1444.714 | 0.0012    | 0.8   | 4.79 | 533778   | 5.74  | HUMAN | Q15149 | Plectin                                                |
| 13450 | dirMS_041712_NAR_30mM_minus12050.12050.2  | 2 | 8.55 | 0 | 8.77E-05 | (R)YEQLEH(R)Y Q E L M V N V Q(K)                         | 119    | 577.2825 | 1153.556 | 0.0019    | 1.7   | 4.53 | 56607.4  | 5.37  | HUMAN | F8VX04 | Keratin, type II cytoskeletal R                        |
| 13451 | dirMS_041712_NAR_30mM_minus26332.6332.2   | 2 | 8.55 | 0 | 1.91E-04 | (R)KEVEDE(K)K E V I E E D E V(K)E                        | 89.48  | 520.5277 | 1040.442 | 0.0023    | 2.2   | 3.91 | 92752.5  | 4.76  | HUMAN | PI4625 | Endoplasmic                                            |
| 13452 | dirMS_041712_NAR_40mM_minus11951.11951.3  | 3 | 8.55 | 1 | 4.89E-04 | (R)SISGEP(R)K S I E G E P V S E I E K(K)E                | 135.57 | 514.6302 | 1541.879 | -0.0205   | -1.6  | 4.78 | 102831.4 | 5.72  | HUMAN | PS3618 | Cotamer subunit beta                                   |
| 13453 | dirMS_041712_NAR_50mM_minus12200.1220     |   |      |   |          |                                                          |        |          |          |           |       |      |          |       |       |        |                                                        |



|       |                                            |   |      |                   |                                                       |        |           |          |         |       |      |          |             |         |                                                                                   |
|-------|--------------------------------------------|---|------|-------------------|-------------------------------------------------------|--------|-----------|----------|---------|-------|------|----------|-------------|---------|-----------------------------------------------------------------------------------|
| 13512 | dirMS_041712_NAR_60mM_minus.8083.8083.3    | 3 | 8.53 | 1.138E+05         | (K)FAAGE (K)F/A K E G E Q/LG/P A/E/R(A)               | 10553  | 477.5852  | 1470.739 | 0.0028  | 17    | 6.14 | 96306.4  | 6.41 HUMAN  | P13639  | Elongation factor 2                                                               |
| 13513 | dirMS_041712_NAR_120mM_plus.15286.15286.4  | 4 | 8.53 | 1.474E+06         | (R)IKVAPD (R)I/V K P/A P D E T/P E S/E A L/R K(S)     | 1334   | 472.7599  | 1888107  | 0.0003  | -0.2  | 6.15 | 43389.6  | 5.19 HUMAN  | Q12905  | Interleukin enhancer-binding factor 2                                             |
| 13514 | dirMS_041712_NAR_20mM_plus.3601.3601.2     | 2 | 8.53 | 0.132E+05         | (K)IVGQV (K)I/V G/S G/L G/L R(A)                      | 1590   | 456.1427  | 913.576  | -0.0006 | -10   | 9.32 | 20385.2  | 6.57 HUMAN  | Q12905  | 60 kDa heat shock protein, mitochondrial                                          |
| 13515 | dirMS_041712_NAR_20mM_plus.15537.15537.2   | 2 | 8.53 | 0.168E+04 M73m    | (R)IAIIVD (R)I/A I V/D L/T P E T G M V D S/V R(S)     | 17798  | 816.4811  | 1615.836 | 15.9529 | -1.2  | 4.03 | 27549.9  | 4.39 HUMAN  | EP9814  | Tubulin beta chain                                                                |
| 13516 | dirMS_041712_NAR_20mM_plus.16487.16487.3   | 3 | 8.53 | 0.682E+04 M137m M | (R)IIGAGD (R)I/G I G A T D S G E L/H F L M K(R)       | 1858   | 584.2872  | 1712.86  | 31.9873 | -1.5  | 4.37 | 19439.5  | 4.97 HUMAN  | MSD17   | Chromobox protein homolog 1 (Fragment)                                            |
| 13517 | dirMS_041712_NAR_20mM_plus.18801.18801.2   | 2 | 8.53 | 0.380E+04         | (K)EIOVLV (K)E I/V D/L V/L D R(I)                     | 20117  | 543.313   | 1065.62  | -0.0014 | -1.3  | 4.03 | 58642    | 4.95 HUMAN  | FSH033  | Tubulin alpha-1C chain                                                            |
| 13518 | dirMS_041712_NAR_20mM_plus.3601.3601.2     | 2 | 8.53 | 0.139E+05         | (R)HPPPPR (R)H/P P/P P/P A R(A)                       | 1942   | 456.1427  | 913.576  | -0.0006 | -10   | 9.32 | 20385.2  | 6.57 HUMAN  | BDP078  | Heterogeneous nuclear ribonucleoproteins C1/C2                                    |
| 13519 | dirMS_041712_NAR_30mM_plus2.15113.15298.2  | 2 | 8.53 | 0.422E+05         | (R)EIFYMRA (R)E I/F Y/M A/R R(I)                      | 13232  | 435.2435  | 865.46   | 0.0017  | -2    | 1.1  | 44954.5  | 8.44 HUMAN  | AK8323  | 26S protease regulatory subunit 8                                                 |
| 13520 | dirMS_041712_NAR_30mM_plus2.15340.15340.2  | 2 | 8.53 | 0.276E+05         | (R)ILLCNFN (R)I/L C/N F/M R(R)                        | 13295  | 477.2409  | 953.47   | 0.005   | 5.2   | 9.75 | 18685.5  | 9.45 HUMAN  | B4DEVB  | Proteasome subunit alpha type                                                     |
| 13521 | dirMS_041712_NAR_30mM_plus2.16828.16828.2  | 2 | 8.53 | 0.283E+05         | (R)ISQADQ (R)I/S Q I/Q A D G T/V/L W G S S K(L)       | 140.9  | 674.3475  | 1347.69  | -0.0026 | -1.9  | 5.55 | 24934.4  | 4.5 HUMAN   | 24934.4 | Elongation factor 1-beta                                                          |
| 13522 | dirMS_041712_NAR_50mM_plus2.17378.17378.3  | 3 | 8.53 | 1.188E+06         | (R)IKQDTR (R)I/Q D T R K T O A G T/V/L A/V N V L R(N) | 140    | 543.3085  | 1027.913 | -0.0016 | -1    | 8.75 | 77973    | 5.16 HUMAN  | EP9815  | Heat shock cognate 71 kDa protein (Fragment)                                      |
| 13523 | dirMS_041712_NAR_50mM_plus2.14808.14808.3  | 3 | 8.53 | 1.715E+05         | (R)IAIAPVQ (R)I/A I A P V/Q G/L V L P F R(K)          | 142.6  | 546.11839 | 1027.913 | -0.0004 | -1.6  | 4.56 | 11893.9  | 6.14 HUMAN  | P21414  | Ubiquitin-like modifier-activating enzyme 1                                       |
| 13524 | dirMS_041712_NAR_50mM_plus2.18422.18422.3  | 3 | 8.53 | 1.537E+05         | (K)VIATM (K)I/V I A/T M N R V/D L D P/L A R(S)        | 16452  | 617.3645  | 1850.086 | -0.0069 | -3.7  | 5.93 | 32827.5  | 5.92 HUMAN  | EP9KDS  | 26S protease regulatory subunit 6A (Fragment)                                     |
| 13525 | dirMS_041712_NAR_50mM_plus.10504.10504.3   | 3 | 8.53 | 1.181E+05         | (K)ITAVCDI (K)I/T A V C/D I P P G A V K(R)            | 11195  | 442.9125  | 1326.72  | 0.0031  | 2.3   | 8.1  | 50199.4  | 4.75 HUMAN  | ANNZ22  | Tubulin beta-8 chain-like protein LOC2030334                                      |
| 13526 | dirMS_041712_NAR_50mM_plus.10659.10659.3   | 3 | 8.53 | 1.321E+04         | (R)IRLQALI (R)I/R Q L A I E D/V/L A Q/W R(A)          | 11727  | 523.9486  | 1569.834 | -0.0031 | -2    | 4.68 | 533778   | 5.74 HUMAN  | Q15149  | Plectin                                                                           |
| 13527 | dirMS_041712_NAR_60mM_plus.21767.21767.3   | 3 | 8.53 | 0.346E+05         | (K)IPGLL (K)I/P G/L L V/P F R(K)                      | 18305  | 425.1463  | 1276.794 | -0.001  | -0.8  | 9.75 | 141616.6 | 6.1 HUMAN   | BT2M48  | Protein transport protein Sec24B                                                  |
| 13528 | dirMS_041712_NAR_120mM_minus.7473.7473.3   | 3 | 8.52 | 0.137E+05         | (R)IEVPDPT (R)I/E V P D T Q/V T G/R(K)                | 94.9   | 441.2234  | 1321.65  | 0.0061  | 4.6   | 6.17 | 34187.3  | 9.64 HUMAN  | CN9060  | Uncharacterized methyltransferase WBSCR22                                         |
| 13529 | dirMS_041712_NAR_30mM_minus2.18497.18497.2 | 2 | 8.52 | 0.987E+03         | (K)NLNGTV (K)N L/N G/T V G F R T(R)                   | 15428  | 570.3115  | 1139.621 | -0.005  | -4.4  | 8.75 | 95141.7  | 5.22 HUMAN  | BT7463  | Puromycin-sensitive aminopeptidase                                                |
| 13530 | dirMS_041712_NAR_30mM_minus2.8380.8380.2   | 2 | 8.52 | 0.270E+04 M49m    | (R)IYMDLAE (R)I/Y M D/L A/E N A R(F)                  | 100.4  | 549.7514  | 1082.494 | 16.002  | 6.5   | 4.37 | 88624.6  | 5.09 HUMAN  | CN8U11  | Cytosolin A (Fragment)                                                            |
| 13531 | dirMS_041712_NAR_50mM_minus2.11483.11483.3 | 3 | 8.52 | 1.122E+05         | (K)IMVUSY (K)M I/V Y S G A/G D V/K L T(K)             | 132.95 | 444.9227  | 1332.756 | -0.002  | -1.5  | 8.35 | 55323    | 6.02 HUMAN  | BDP078  | T-complex protein 1 subunit zeta                                                  |
| 13532 | dirMS_041712_NAR_50mM_minus2.14805.14805.3 | 3 | 8.52 | 1.443E+04         | (R)ISLSEES (R)I/S L S/E E S/L K L P A E S N E K(I)    | 15255  | 625.3311  | 1873.971 | 0.0034  | 1.8   | 4.49 | 90274.8  | 6.92 HUMAN  | P22059  | Oxyester-binding protein 1                                                        |
| 13533 | dirMS_041712_NAR_50mM_minus2.8683.8683.3   | 3 | 8.52 | 1.419E+04 M88m    | (K)IDVDEA (K)I/D V D E A E Y M N K V L/E S/R(L)       | 117.5  | 605.2817  | 1797.832 | 15.9982 | 1.8   | 4.48 | 13588.1  | 4.66 HUMAN  | F8VPE7  | Keratin, type II cytoskeletal 8 (Fragment)                                        |
| 13534 | dirMS_041712_NAR_60mM_minus.7537.7537.3    | 3 | 8.52 | 1.570E+04         | (K)ITEADA (K)I/T E A D A E A/K T/F E E K(Q)           | 101.08 | 466.5515  | 1397.643 | -0.0031 | -2.2  | 4.25 | 32503.1  | 5.29 HUMAN  | H7B116  | Nucleolin (Fragment)                                                              |
| 13535 | dirMS_041712_NAR_60mM_minus.8077.8077.3    | 3 | 8.52 | 0.129E+05         | (K)IEAPDQ (K)I/E A P D Q L T Q E F K(N)               | 105.03 | 455.4247  | 1364.612 | 0.0018  | 1.3   | 4.65 | 25898    | 9.48 HUMAN  | DP9016  | Thymocyte nuclear protein 1                                                       |
| 13536 | dirMS_041712_NAR_60mM_plus.9700.9700.3     | 3 | 8.52 | 0.305E+05         | (R)RIHLEP (R)R I/H L E/P L V E I S L T C T(K)         | 114.13 | 415.25    | 1241.726 | 0.0006  | 7.9   | 8.59 | 18939.9  | 6.49 HUMAN  | P22114  | Ubiquitin-like modifier-activating enzyme 1                                       |
| 13537 | dirMS_041712_NAR_120mM_plus.12346.12346.4  | 4 | 8.52 | 1.214E+06         | (K)ILTITV (K)I/L T T V Q I G A D D V D K K(L)         | 117.6  | 449.7412  | 1795.944 | -0.0006 | -0.4  | 5.71 | 13778.5  | 7.96 HUMAN  | K7EM18  | Eukaryotic translation initiation factor 1                                        |
| 13538 | dirMS_041712_NAR_20mM_plus.11471.11471.2   | 2 | 8.52 | 0.215E+05         | (K)IVGQLVQ (K)I/V G Q/L V Q/V V V A(K)                | 151.5  | 456.7977  | 912.588  | 0.0004  | 0.5   | 8.72 | 61224.7  | 5.7 HUMAN   | P18089  | 60 kDa heat shock protein, mitochondrial                                          |
| 13539 | dirMS_041712_NAR_20mM_plus.15117.15117.2   | 2 | 8.52 | 0.588E+04         | (R)IEGLAAR (R)I/E G L A A R I E F/A R(S)              | 176.1  | 574.312   | 1147.611 | 0.0061  | 5.3   | 4.53 | 44227.3  | 7.81 HUMAN  | ET606E  | T-complex protein 1 subunit alpha                                                 |
| 13540 | dirMS_041712_NAR_20mM_plus.17549.17549.3   | 3 | 8.52 | 0.839E+05 M215m   | (K)IADIDM (K)I/A D I D M L D T D Q/A K(L)             | 154.08 | 588.8842  | 1504.75  | -0.0002 | -0.9  | 6.10 | 8436.2   | 6.02 HUMAN  | EP9KDS  | 60 kDa heat shock protein, mitochondrial (Fragment)                               |
| 13541 | dirMS_041712_NAR_30mM_plus2.20991.20991.2  | 2 | 8.52 | 0.386E+05         | (K)AIDATD (K)A I/D A T D T D Q/A K(L)                 | 164.47 | 553.8012  | 1106.609 | 0.0041  | -12.7 | 4.21 | 18141.9  | 4.7 HUMAN   | F6V0H7  | Hs70-interacting protein (Fragment)                                               |
| 13542 | dirMS_041712_NAR_30mM_plus2.21412.21412.2  | 2 | 8.52 | 0.158E+05         | (R)IVFGN (R)I/V F G N L G/L N T L V V K(K)            | 167.38 | 658.8983  | 1316.794 | -0.0043 | -3.3  | 8.72 | 15791.7  | 9.22 HUMAN  | BD45U6  | Heterogeneous nuclear ribonucleoproteins C1/C2                                    |
| 13543 | dirMS_041712_NAR_30mM_plus2.8409.8409.2    | 2 | 8.52 | 1.570E+05         | (K)LSERNU (K)L S/E R N U L K C(L)                     | 98.27  | 430.2487  | 859.5    | -0.0095 | -1.1  | 8.75 | 35968    | 9.26 HUMAN  | QBNSC1  | Protein FAM202                                                                    |
| 13544 | dirMS_041712_NAR_50mM_plus2.15976.15976.3  | 3 | 8.52 | 1.272E+05         | (K)LTFTAE (K)L T/F T A E S L I L K N P E K(S)         | 102.25 | 553.7939  | 1167.612 | -0.0005 | -3.9  | 6.25 | 21509.2  | 6.1 HUMAN   | IJ00M1  | Human 1, isoforn CRA_3                                                            |
| 13545 | dirMS_041712_NAR_50mM_plus2.16348.16348.3  | 3 | 8.52 | 1.873E+04         | (R)IQSDAQ (R)I/Q S D A Q K V I/E/L F A K(I)           | 152.72 | 528.2635  | 1585.774 | 0.0015  | -1    | 4.41 | 14914.1  | 6.84 HUMAN  | P23598  | 40S ribosomal protein S12                                                         |
| 13546 | dirMS_041712_NAR_50mM_plus2.18357.18357.3  | 3 | 8.52 | 1.349E+05         | (R)IGDSVAV (R)I/G S V A V L V L N R P L I A G(K)      | 165.37 | 550.9999  | 1650.959 | -0.0059 | -3    | 8.75 | 13434.3  | 10.23 HUMAN | K7E185  | Small nuclear ribonucleoprotein Sm D2                                             |
| 13547 | dirMS_041712_NAR_50mM_plus2.21888.21888.3  | 3 | 8.52 | 1.123E+04         | (R)INMLLE (R)I/N M L L E L L Q V D R N E R(K)         | 186.87 | 625.6716  | 1874.997 | 0.0032  | 1.7   | 4.68 | 62866    | 5.73 HUMAN  | CN92H7  | Antyproliferical lateral sclerosis 2 chromosomal region candidate gene 11 protein |
| 13548 | dirMS_041712_NAR_50mM_plus2.2394.2394.3    | 3 | 8.52 | 1.196E+05 M32m    | (K)GNMHP (K)G N M H P E K S Q D G K(N)                | 104.6  | 420.8922  | 1244.667 | 15.9593 | 0.3   | 8.59 | 10803.5  | 9.82 HUMAN  | BD2Z18  | 10 kDa heat shock protein, mitochondrial                                          |
| 13549 | dirMS_041712_NAR_60mM_plus.13952.13952.3   | 3 | 8.52 | 0.156E+06         | (K)ILQADQ (K)I/L Q A D Q I G S W G V L V P A R(S)     | 129.07 | 509.2606  | 1526.769 | -0.0002 | -1.3  | 9.75 | 42510.4  | 7.04 HUMAN  | PR1733  | Alpha-endrase                                                                     |
| 13550 | dirMS_041712_NAR_60mM_plus.14790.14790.3   | 3 | 8.52 | 1.963E+04         | (R)IKFDGR (R)I/K F D G R V/V V/S Q D(R)               | 133.93 | 433.5671  | 1298.699 | -0.0123 | -9.5  | 6.07 | 20931.1  | 10.28 HUMAN | DR6N4A  | 60S ribosomal protein L9 (Fragment)                                               |
| 13551 | dirMS_041712_NAR_60mM_plus.6812.6812.3     | 3 | 8.52 | 1.659E+05         | (R)IEKVPGR (R)I/E K V P G G U/LQ/G S/Q/R(G)           | 94.18  | 457.9675  | 1370.702 | 0.0112  | 8.2   | 6.17 | 180453.7 | 6.04 HUMAN  | HY01Q2  | YLP motif-containing protein 1 (Fragment)                                         |
| 13552 | dirMS_041712_NAR_120mM_minus.13896.13896.4 | 4 | 8.51 | 2.543E+05         | (R)IKVIEGR (R)I/K V I E G R V L E G D U R T E R(A)    | 129.85 | 450.7512  | 1799.986 | -0.0028 | -1.8  | 4.58 | 33450.2  | 4.73 HUMAN  | JKM07   | Tomoponyin alpha-3 chain                                                          |
| 13553 | dirMS_041712_NAR_120mM_minus.16880.16880.4 | 4 | 8.51 | 0.839E+05         | (R)IYVDFG (R)I/Y V D F G V L V L P L R(K)             | 146.4  | 410.8269  | 1197.612 | -0.0002 | -1.7  | 4.64 | 21600.2  | 6.02 HUMAN  | EP9KDS  | Heat shock protein HSP 90-alpha                                                   |
| 13554 | dirMS_041712_NAR_30mM_minus2.11782.11782.2 | 2 | 8.51 | 0.559E+05 M64m    | (K)IVYNGF (K)I/V Y N G F V L V F C S/Q(R)             | 117.53 | 553.7611  | 1090.506 | 16.0009 | 12.7  | 8.56 | 76925.9  | 4.46 HUMAN  | AM8V58  | Debrin                                                                            |
| 13555 | dirMS_041712_NAR_40mM_minus2.9626.9626.2   | 2 | 8.51 | 0.124E+06         | (R)IAPVEE (R)I/A P V E E H P V L T Q/L P L N P K(I)   | 139.8  | 477.5343  | 1954.064 | -0.0031 | -1.6  | 4.75 | 18032.2  | 5.25 HUMAN  | ETV656  | Actin, cytoplasmic 1 (Fragment)                                                   |
| 13556 | dirMS_041712_NAR_60mM_minus.10809.10809.3  | 3 | 8.51 | 1.544E+05 M239m   | (R)IMSAME (R)I/M S A M E L T Q/L M L N P K(I)         | 119.9  | 647.3011  | 1923.897 | 15.9915 | -1.8  | 4.68 | 40069.4  | 4.83 HUMAN  | ETV819  | Tubulin beta chain                                                                |
| 13557 | dirMS_041712_NAR_60mM_minus.14768.14768.3  | 3 | 8.51 | 1.172E+05         | (K)IVSGLQ (K)I/V S G L Q V E L L E L K(K)             | 152.9  | 452.9408  | 1356.81  | -0.0028 | -1.4  | 6.11 | 11899.6  | 6.59 HUMAN  | Q7L311  | Programmed cell death protein 5                                                   |
| 13558 | dirMS_041712_NAR_60mM_minus.18217.18217.3  | 3 | 8.51 | 1.962E+04         | (R)INMPTLAK (R)I/N M P T L A K D V L P V R(K)         | 162.68 | 452.9408  | 1356.789 | 0.0193  | 14.2  | 8.59 | 20960.6  | 7.05 HUMAN  | HY01K1  | Tomoponyin-3 (Fragment)                                                           |
| 13559 | dirMS_041712_NAR_60mM_minus.20125.20125.3  | 3 | 8.51 | 0.405E+05         | (K)HGYHTE (K)H G Y T E G A E L V S V/D V V R(K)       | 184.27 | 653.6647  | 1958.982 | -0.0022 | -1.1  | 4.31 | 42831.5  | 4.86 HUMAN  | AK8554  | HCG1983504, isoforn CRA_f                                                         |
| 13560 | dirMS_041712_NAR_60mM_minus.8928.8928.3    | 3 | 8.51 | 0.432E+03         | (R)ILSDSD (R)I/L S D S D G T I/V/D D S R(K)           | 109.43 | 553.919   | 1659.746 | -0.0032 | -1.9  | 4.03 | 23037.1  | 5.11 HUMAN  | EP9MH2  | Peptidyl-prolyl cis-trans isomerase (Fragment)                                    |
| 13561 | dirMS_041712_NAR_120mM_plus.8084.8084.2    | 2 | 8.51 | 0.142E+06         | (R)IHSDVQ (R)I/H S D V Q G V I M V/G S M D(K)         | 96.13  | 586.2888  | 1713.571 | -0.0007 | -0.6  | 8.76 | 32616.5  | 5.18 HUMAN  | AN0176  | Actin, alpha skeletal muscle                                                      |
| 13562 | dirMS_041712_NAR_120mM_plus.9776.9776.4    | 4 | 8.51 | 1.192E+05         | (R)IIVSAG (R)I/I V S A G S N K V E L R(K)             | 105.45 | 455.9849  | 1700.918 | 0.0004  | 0.5   | 8.97 | 11566.7  | 6.99 HUMAN  | EP9H55  | DNA replication licensing factor MCM4 (Fragment)                                  |
| 13563 | dirMS_041712_NAR_120mM_plus.9863.9863.3    | 3 | 8.51 | 0.361E+05 M31m    | (K)HYHPSG (K)H Y H P S G V W I V S M A N A G(K)       | 104.77 | 497.5659  | 1474.69  | 15.9596 | 0.9   | 8.6  | 23999.1  | 9.48 HUMAN  | P23284  | Peptidyl-prolyl cis-trans isomerase B                                             |
| 13564 | dirMS_0                                    |   |      |                   |                                                       |        |           |          |         |       |      |          |             |         |                                                                                   |







|       |                                            |   |      |   |                |                                                          |        |          |          |         |       |      |          |      |       |        |                                                                          |
|-------|--------------------------------------------|---|------|---|----------------|----------------------------------------------------------|--------|----------|----------|---------|-------|------|----------|------|-------|--------|--------------------------------------------------------------------------|
| 13948 | dirMS_041712_NAR_50mM_plus2.15347.15347.3  | 3 | 8.34 | 1 | 8.13E+05       | (RIGPPTFR)(RIG FIP T)Y F/SP/N A N K RL)                  | 14.883 | 490.5973 | 1469.779 | -0.014  | -0.9  | 9.7  | 53661.8  | 6.42 | HUMAN | SEAS2  | Protein disulfide isomerase family A, member 3, isoform CRA_b            |
| 13949 | dirMS_041712_NAR_50mM_plus2.15463.15463.3  | 3 | 8.34 | 1 | 9.88E+05       | (RIKVGQV)(RK V E G V T A I E I L L D E T G/T F/R/R)      | 14.933 | 650.0048 | 1948.002 | -0.004  | -1.2  | 4.32 | 86688.3  | 5.77 | HUMAN | BAD026 | Fragile X mental retardation syndrome-related protein 1                  |
| 13950 | dirMS_041712_NAR_50mM_plus2.15822.15822.3  | 3 | 8.34 | 1 | 1.94E+05       | (RIVSAGE)(RIV S/A/E/A/V A E E P P/R/K)                   | 9.50   | 25.1431  | 115.000  | -0.001  | -0.3  | 9.9  | 25.1431  | 6.00 | HUMAN | P00141 | Porefibrin-6                                                             |
| 13951 | dirMS_041712_NAR_50mM_plus2.17448.17448.3  | 3 | 8.34 | 1 | 4.78E+05       | (RIKVEVL)(R V E L G V A L V P L V/V L/R RL)              | 15.983 | 432.2745 | 1294.809 | -0.004  | -0.3  | 6.24 | 20422.4  | 5.35 | HUMAN | HY052  | Succinyl-CoA ligase [GDP-forming] subunit beta, mitochondrial (Fragment) |
| 13952 | dirMS_041712_NAR_50mM_plus2.20103.20103.3  | 3 | 8.34 | 0 | 2.68E+05       | (RIQLSPFR)(R QV S/L P/A/L/H/L N L K/A)                   | 17.93  | 532.3178 | 1594.931 | -0.003  | -4.6  | 8.76 | 175851.7 | 5.03 | HUMAN | Q14160 | Protein scribble homolog                                                 |
| 13953 | dirMS_041712_NAR_60mM_plus.18205.18205.3   | 3 | 8.34 | 1 | 3.37E+05       | (RIJROSLR)(R R I D V S L V A Q/L/S/Q/L Q/K Q)            | 153.28 | 567.3254 | 1699.97  | -0.005  | -5    | 8.75 | 61336.9  | 5.81 | HUMAN | DBR4Q3 | Prelamin-A/C                                                             |
| 13954 | dirMS_041712_NAR_60mM_plus.5182.5182.3     | 3 | 8.34 | 1 | 4.08E+05       | (RIVSAGE)(RIV S/A/E/A/V A E E P P/R/K)                   | 9.50   | 43.8885  | 195.551  | -0.001  | -0.4  | 4.79 | 4520.4   | 6.15 | HUMAN | Q00516 | Non-histone chromosomal protein HMG-14                                   |
| 13955 | dirMS_041712_NAR_120mM_minus.5605.5605.3   | 3 | 8.33 | 1 | 1.10E+05       | (RIVSGDG)(KIVS G Q V E/D/G/D P T/A R)                    | 84.03  | 463.2365 | 1387.681 | 0.017   | 9.9   | 4.56 | 33726    | 7.84 | HUMAN | B3K1V4 | SUMO-1 activating enzyme subunit 1, isoform CRA_a                        |
| 13956 | dirMS_041712_NAR_30mM_minus.17696.17696.3  | 3 | 8.33 | 0 | 1.27E+05       | (RISLAALS)(R LVA A/L/S I Q/A/V Y/R N)                    | 150.78 | 440.9139 | 1320.727 | 0.001   | 0.1   | 8.46 | 64225    | 6.66 | HUMAN | E7KX44 | Caldesmon                                                                |
| 13957 | dirMS_041712_NAR_40mM_minus.14318.14318.3  | 3 | 8.33 | 1 | 1.61E+05       | (KITGSDG)(R T G V S D V V K A F/D/LA/V/V R)              | 16.848 | 640.3454 | 1919.023 | -0.016  | -0.8  | 4.43 | 76670.1  | 4.6  | HUMAN | P19338 | Nucleolin                                                                |
| 13958 | dirMS_041712_NAR_40mM_plus.21816.21816.3   | 3 | 8.33 | 0 | 1.13E+04 M33m  | (RIVYTEDG)(R V L T/D E E G N P/L I Q D A I A/R L)        | 127.97 | 656.9824 | 1952.938 | -0.015  | -0.2  | 4.17 | 40874    | 5.06 | HUMAN | EP9C9  | Farnesyl pyrophosphate synthase                                          |
| 13959 | dirMS_041712_NAR_50mM_plus.6662.6662.3     | 3 | 8.33 | 1 | 5.62E+04       | (RIKVAQZP)(R V L V S Q/L P Q/K V R)                      | 104.9  | 581.9245 | 1743.852 | -0.012  | -6.9  | 4.32 | 81895.5  | 5.78 | HUMAN | EP0425 | Parthenocytosis kinase 4                                                 |
| 13960 | dirMS_041712_NAR_60mM_minus.14900.14900.3  | 3 | 8.33 | 1 | 1.58E+05       | (RISFDLLR)(R E I)D/A/L/N/R/R(E)                          | 142.73 | 410.2411 | 1228.701 | 0.079   | 6.5   | 5.79 | 75617.5  | 5.46 | HUMAN | A6N8N0 | Anexin                                                                   |
| 13961 | dirMS_041712_NAR_60mM_minus.17890.17890.3  | 3 | 8.33 | 1 | 4.78E+05       | (RIKVESLQ)(R K V E S/L Q E/L A/F L/K R)                  | 160.22 | 511.9529 | 1533.852 | -0.081  | -5.3  | 4.79 | 49709.6  | 5.19 | HUMAN | BDYCA4 | Vimentin                                                                 |
| 13962 | dirMS_041712_NAR_120mM_plus.10560.10560.2  | 2 | 8.33 | 1 | 1.77E+06       | (RIKVKYEL)(R V I)K/V E L/A/M R(K)                        | 107.83 | 620.3237 | 1239.64  | -0.001  | 0     | 6.11 | 43773.3  | 5.26 | HUMAN | F8V2Y9 | Keratin, type I cytoskeletal 18                                          |
| 13963 | dirMS_041712_NAR_120mM_plus.16351.16351.4  | 4 | 8.33 | 1 | 8.96E+05       | (RIALHTFR)(R L A L E M F T P D L V Q/R R/A)              | 138.43 | 405.9642 | 1200.838 | -0.011  | -0.7  | 5.38 | 193379.8 | 5.48 | HUMAN | Q00610 | Clatrin heavy chain 1                                                    |
| 13964 | dirMS_041712_NAR_30mM_plus.10633.10633.2   | 2 | 8.33 | 0 | 4.60E+04       | (RISGLPLR)(R G V Y L P/D T/K R)                          | 145.88 | 497.2665 | 993.525  | -0.006  | 0.6   | 5.55 | 17045.4  | 4.25 | HUMAN | HY0V5  | Endoplasmic reticulum chaperone protein BiP                              |
| 13965 | dirMS_041712_NAR_20mM_plus.14163.14163.2   | 2 | 8.33 | 0 | 1.01E+05       | (RIEVAQVR)(R E L A V I/Q/I Y E I/A/R/K)                  | 169.88 | 600.839  | 1320.679 | -0.007  | -6.6  | 4.25 | 73386.6  | 8.73 | HUMAN | BAD0X7 | ATP-dependent RNA helicase DDX3Y                                         |
| 13966 | dirMS_041712_NAR_20mM_plus.15737.15737.2   | 2 | 8.33 | 0 | 3.22E+05       | (KIVGNVY)(K V G I N V Q P P T V G P G G L K V)           | 179.12 | 912.9952 | 1824.985 | -0.023  | -1.3  | 5.8  | 49012.3  | 4.9  | HUMAN | ABMUB1 | Tubulin alpha-4A chain                                                   |
| 13967 | dirMS_041712_NAR_20mM_plus.16691.16691.2   | 2 | 8.33 | 0 | 2.39E+05       | (KIVGNVY)(K V G I V A V I/A V A E L L Q R/R)             | 186.53 | 776.5419 | 1552.881 | -0.004  | -2.6  | 5.97 | 10728.1  | 9.15 | HUMAN | Q9YF54 | Mitochondrial import inner membrane translocase subunit Tim13            |
| 13968 | dirMS_041712_NAR_30mM_plus.17755.17755.2   | 2 | 8.33 | 0 | 2.19E+05       | (RIVYQADP)(R V C I A/D A/V F Q R/K)                      | 146.67 | 688.8174 | 1376.63  | -0.028  | -2.1  | 5.83 | 36157.9  | 8.65 | HUMAN | Q13011 | Delta(3,5)-Delta(2,4)-dienoyl-CoA isomerase, mitochondrial               |
| 13969 | dirMS_041712_NAR_40mM_plus2.10034.10034.2  | 2 | 8.33 | 0 | 1.20E+05       | (RIVYS6MY)(R V)S/G/S Y/N D Y/R K)                        | 123.83 | 619.2788 | 1237.548 | 0.019   | 1.6   | 5.83 | 69661.6  | 9.75 | HUMAN | Q06P66 | RNA-binding protein 5                                                    |
| 13970 | dirMS_041712_NAR_40mM_plus2.9030.9030.3    | 3 | 8.33 | 0 | 4.93E+04       | (RIVMVCV)(K V V A Q V I R V G S D H T A A/L D T G D G R) | 110.55 | 637.6448 | 1898.92  | -0.004  | -0.2  | 4.1  | 29854.8  | 9.49 | HUMAN | CJ3R80 | Regulator of chromosome condensation (Fragment)                          |
| 13971 | dirMS_041712_NAR_50mM_plus2.10223.10223.3  | 3 | 8.33 | 0 | 3.78E+05       | (RIVMVCV)(K V V A Q V I R V G S D H T A A/L D T G D G R) | 122.16 | 538.5992 | 1616.777 | 0.006   | -3.7  | 5.88 | 87447.6  | 6.44 | HUMAN | Q12547 | Protein transport protein Sec23B                                         |
| 13972 | dirMS_041712_NAR_50mM_plus2.16117.16117.3  | 3 | 8.33 | 1 | 5.13E+04       | (RIKVLQZP)(R V L V S Q/L P Q/K V R)                      | 152.78 | 484.5899 | 1391.742 | -0.001  | -1.1  | 4.32 | 49892    | 5.86 | HUMAN | BAD0J8 | T-complex protein 1 subunit epsilon                                      |
| 13973 | dirMS_041712_NAR_50mM_plus2.19323.19347.3  | 3 | 8.33 | 1 | 8.77E+05       | (RIASLELA)(R S I L E A/N/A/D A Q R E G L A K)            | 170.55 | 652.6835 | 1956.04  | -0.037  | -1.9  | 4.41 | 56607.4  | 5.37 | HUMAN | F8V8A4 | Keratin, type II cytoskeletal 8                                          |
| 13974 | dirMS_041712_NAR_50mM_plus2.19833.19833.3  | 3 | 8.33 | 0 | 5.26E+04       | (KIGLCLLE)(K C L I C L E Q I D S F K P Q/R I S)          | 172.9  | 634.3344 | 1900.995 | -0.063  | -3.3  | 6.07 | 45536.8  | 9.03 | HUMAN | B7Z1K2 | HBS1-like protein                                                        |
| 13975 | dirMS_041712_NAR_50mM_plus2.20994.20994.3  | 3 | 8.33 | 0 | 3.79E+05 M33m  | (RIHMLTA)(R I L H S T A P I E A S L P A R S)             | 179.67 | 693.6536 | 1945.803 | -0.019  | -10.4 | 6.75 | 167978   | 9.15 | HUMAN | Q14514 | Brain-specific angiogenesis inhibitor 1                                  |
| 13976 | dirMS_041712_NAR_50mM_plus.15525.15525.3   | 3 | 8.33 | 1 | 7.28E+05       | (RIKVEVL)(R V E L G V A L V P L V/V L/R RL)              | 15.983 | 432.2745 | 1294.809 | -0.004  | -0.3  | 6.24 | 20422.4  | 5.35 | HUMAN | HY052  | NHP2 non-histone chromosomal protein 2 like 1 (X. cerevisiae)            |
| 13977 | dirMS_041712_NAR_60mM_plus.17368.17368.3   | 3 | 8.33 | 1 | 3.74E+05       | (RIKVGQV)(R K V E L G V A L V P L V/V L/R RL)            | 148.18 | 650.0117 | 1948.002 | -0.017  | -6    | 4.32 | 86688.3  | 5.77 | HUMAN | BAD026 | Fragile X mental retardation syndrome-related protein 1                  |
| 13978 | dirMS_041712_NAR_120mM_minus.13012.13012.3 | 3 | 8.32 | 1 | 1.39E+05       | (RIVGDLVY)(R V)G/D/V S D V A/D G R G)                    | 125.03 | 455.898  | 1365.676 | 0.037   | 2.7   | 4.43 | 13611    | 6.13 | HUMAN | EP922  | Spectrin beta, non-erythrocytic 2 (Fragment)                             |
| 13979 | dirMS_041712_NAR_20mM_minus.9748.9748.2    | 2 | 8.32 | 0 | 2.50E+05 M33m  | (KIVAGnd)(K V A G S D V I D V I E L T E R N)             | 145.53 | 732.355  | 1447.71  | 15.993  | -1.3  | 4    | 10949.3  | 5.28 | HUMAN | BAD0J2 | 14-3-3 protein epsilon                                                   |
| 13980 | dirMS_041712_NAR_20mM_plus.1476.1476.3     | 3 | 8.32 | 0 | 1.46E+05       | (RISGDFPR)(R S G I F A A V I A T P Q A K/E)              | 10.76  | 28.2465  | 105.027  | -0.002  | -2.7  | 8.3  | 17245.5  | 6.14 | HUMAN | Q97812 | Heterogeneous nuclear ribonucleoprotein A1                               |
| 13981 | dirMS_041712_NAR_40mM_plus2.15428.15428.3  | 3 | 8.32 | 1 | 3.04E+05       | (RIGGPNFT)(R G P N I H T L A V D V I V D P V R/T)        | 174.43 | 622.3523 | 1865.409 | -0.007  | -3.6  | 5.96 | 45481.2  | 7.85 | HUMAN | E7LQ36 | Caselin kinase II subunit alpha                                          |
| 13982 | dirMS_041712_NAR_50mM_plus2.10429.10429.3  | 3 | 8.32 | 1 | 1.08E+05 M72m  | (RIEMENE)(R T/E E M E I E F V L/V D/K R)                 | 127.55 | 499.5937 | 1480.772 | 0.995   | 0     | 4.78 | 13588.1  | 4.66 | HUMAN | F8V6P7 | Keratin, type II cytoskeletal 8 (Fragment)                               |
| 13983 | dirMS_041712_NAR_50mM_minus.17680.17680.3  | 3 | 8.32 | 0 | 1.96E+05       | (RIVDTELR)(R V I C T E L A P L V K Q G R V)              | 168.62 | 580.3212 | 1738.952 | -0.003  | -1.7  | 6.07 | 30659.7  | 9.02 | HUMAN | P16152 | Carbonyl reductase [NADPH]                                               |
| 13984 | dirMS_041712_NAR_50mM_plus.8535.8535.3     | 3 | 8.32 | 1 | 1.85E+04 M244m | (KILYALTE)(K I L I A N T G M D/T R K I K)                | 116.43 | 516.9420 | 1532.835 | -0.978  | -11.9 | 5.96 | 57204.9  | 6.01 | HUMAN | FGW6V5 | T-complex protein 1 subunit beta                                         |
| 13985 | dirMS_041712_NAR_60mM_plus.17252.17252.3   | 3 | 8.32 | 0 | 8.52E+04       | (RIGRGE)(R F E H G I A V P V V V K S A C K/R)            | 136.02 | 597.6247 | 1790.889 | 0.001   | 0.1   | 6.74 | 21005.6  | 5.12 | HUMAN | Q04760 | Lactoferrin-like type 1                                                  |
| 13986 | dirMS_041712_NAR_120mM_plus.10218.10218.3  | 3 | 8.32 | 1 | 6.04E+06 S65s  | (RIJGDFEY)(R I G D Y E P I N T G K L Y L R)              | 108.65 | 654.972  | 1759.865 | -0.035  | -21.9 | 6.07 | 27176.8  | 9.3  | HUMAN | Q6T310 | Ras-like protein family member 11A                                       |
| 13987 | dirMS_041712_NAR_120mM_plus.24000.24000.4  | 4 | 8.32 | 2 | 2.52E+05       | (RIRGVMV)(R R G M V L A/D V A/V I A E L K/Q)             | 179.92 | 429.0075 | 1713.009 | -0.001  | -0.6  | 8.59 | 25225.7  | 9.52 | HUMAN | E7ESH4 | 60 kDa heat shock protein, mitochondrial (Fragment)                      |
| 13988 | dirMS_041712_NAR_20mM_plus.9565.9565.3     | 3 | 8.32 | 0 | 1.07E+05       | (KISTAGD)(K I S T A G D T L H G E F D D M R/R)           | 103.08 | 564.579  | 1691.726 | -0.001  | -1.9  | 4.22 | 69032.8  | 5.37 | HUMAN | EP9K6  | Heat shock cognate 71 kDa protein                                        |
| 13989 | dirMS_041712_NAR_20mM_plus.12725.12725.3   | 3 | 8.32 | 1 | 1.18E+05 M137m | (RIVSAGE)(RIV S/A/E/A/V A E E P P/R/K)                   | 9.50   | 25.1431  | 115.000  | -0.001  | -0.3  | 9.9  | 25.1431  | 6.00 | HUMAN | Q00516 | Non-histone chromosomal protein HMG-14                                   |
| 13990 | dirMS_041712_NAR_20mM_plus.12874.12874.2   | 2 | 8.32 | 1 | 1.44E+05       | (RIWVPSAR)(R V I V P A/S Q C G S L V L/S K)              | 161.58 | 714.8911 | 1428.788 | -0.031  | -2.1  | 8.75 | 32632.7  | 8.75 | HUMAN | BAD1CO | Poly(C)-binding protein 1                                                |
| 13991 | dirMS_041712_NAR_20mM_plus.14695.14695.2   | 2 | 8.32 | 1 | 1.98E+05 M179m | (KjM)PVLLE(KjM F V I)D E I A D E N L S R(G)              | 173.6  | 794.3555 | 1555.713 | 31.9906 | 0.5   | 3.91 | 41517.9  | 5.45 | HUMAN | E7GQ62 | Eukaryotic initiation factor 4A-II                                       |
| 13992 | dirMS_041712_NAR_20mM_plus.16339.16339.2   | 2 | 8.32 | 0 | 8.43E+04       | (RIAYLNLV)(R V I)A/L/V L/D K)                            | 183.77 | 467.2905 | 933.577  | -0.031  | -3.3  | 8.63 | 42755    | 7.81 | HUMAN | E7Z2F4 | T-complex protein 1 subunit delta                                        |
| 13993 | dirMS_041712_NAR_20mM_plus.17007.17007.2   | 2 | 8.32 | 0 | 1.41E+05       | (KIFTEAEL)(K I F T E A E L V I A V I R/K)                | 102.72 | 503.2442 | 1265.689 | -0.077  | -6.4  | 8    | 44227.3  | 7.93 | HUMAN | E7C086 | Fujipilin                                                                |
| 13994 | dirMS_041712_NAR_20mM_plus.18312.18312.2   | 2 | 8.32 | 0 | 1.70E+05       | (RIILTGSL)(R L T G S Q L A L F A G S G V I V G)          | 129.02 | 666.8682 | 1332.789 | -0.034  | -2.6  | 8.75 | 45024.5  | 5.29 | HUMAN | B4E1F3 | Selenium-binding protein 1                                               |
| 13995 | dirMS_041712_NAR_20mM_plus.8207.8207.2     | 2 | 8.32 | 0 | 1.06E+05       | (KIVTEDTS)(K V T E D T S F R/T/S V L R S)                | 167.52 | 553.7889 | 1106.569 | 0.017   | 1.6   | 4.37 | 80685.1  | 7.31 | HUMAN | EP0565 | Propionyl-CoA carboxylase alpha chain, mitochondrial                     |
| 13996 | dirMS_041712_NAR_30mM_plus2.17906.17906.2  | 2 | 8.32 | 0 | 6.24E+04       | (KITFEVDC)(K I T F E V D C L P V R/A)                    | 147.03 | 618.3057 | 1235.609 | -0.048  | -3.9  | 4.37 | 99900.1  | 5.04 | HUMAN | BAD028 | Coatomer protein complex, subunit beta 2 (Beta prime), isoform CRA_b     |
| 13997 | dirMS_041712_NAR_30mM_plus2.18409.18409.2  | 2 | 8.32 | 0 | 2.24E+05       | (KITTFEDU)(K I T F E D U L I G L V R/A)                  | 149.45 | 561.7934 | 1122.579 | 0.006   | 0.5   | 4.37 | 128523.4 | 7.06 | HUMAN | B7Z1U0 | Protein transport protein Sec3A                                          |
| 13998 | dirMS_041712_NAR_30mM_plus2.21580.215      |   |      |   |                |                                                          |        |          |          |         |       |      |          |      |       |        |                                                                          |

|       |                                            |     |      |           |                                                |        |          |          |         |      |      |          |             |        |                                                                             |
|-------|--------------------------------------------|-----|------|-----------|------------------------------------------------|--------|----------|----------|---------|------|------|----------|-------------|--------|-----------------------------------------------------------------------------|
| 14057 | dirMS_041712_NAR_120mM_plus.18259.5962.2   | 2   | 8.28 | 1.229E+06 | (KIREEYPP(K)R/E/E/V/P/D)                       | 84.93  | 539.2694 | 1077.532 | -0.0008 | -0.8 | 4.68 | 4220.88  | 4.77 HUMAN  | ANK28  | Pativatic tubulin beta chain-like protein ENSP00000290377                   |
| 14058 | dirMS_041712_NAR_120mM_plus.9899.8694      | 4   | 8.28 | 2.932E+06 | (RIVLTVNG(R)Y/L/V/T/V/N/Q/T/A/E/N/L/R/K/F)     | 104.23 | 446.7675 | 1794.039 | -0.0015 | -0.3 | 9.99 | 10815.17 | 6.08 HUMAN  | FZ288  | 60S ribosomal protein L35                                                   |
| 14059 | dirMS_041712_NAR_120mM_plus.9771.13.1      | 2   | 8.28 | 2.306E+05 | (IOTGSLG(R)G/L/I/V/S/Q/D/C/D/L/G/R/K)          | 101.5  | 541.2447 | 1931.377 | -0.0011 | -1.1 | 8.17 | 3093.93  | 6.08 HUMAN  | PK4    | Pyruvate kinase                                                             |
| 14060 | dirMS_041712_NAR_20mM_plus.13631.13611.2   | 2   | 8.28 | 0.821E+04 | (RATUATVY(R)A/T/VYVIT/G/E/D/E/R/L)             | 166.28 | 626.3269 | 1251.658 | -0.0114 | -9.1 | 4.37 | 24376.8  | 10.08 HUMAN | EP9K6  | Protein arginase N-methyltransferase 1 (Fragment)                           |
| 14061 | dirMS_041712_NAR_20mM_plus.18138.18138.2   | 2   | 8.28 | 0.983E+04 | (R)APGGI(R)A/P/G/S/G/L/A/LP/L(V)K/I)           | 196.67 | 586.8548 | 1136.704 | -0.0014 | -1.3 | 8.8  | 26616.1  | 5.68 HUMAN  | EP9PU  | Euplakin                                                                    |
| 14062 | dirMS_041712_NAR_20mM_plus.18529.18529.3   | 3   | 8.28 | 0.220E+05 | (R)SLVVEA(R)S/V/E/E/A/V/A/G(V)G/E/G/E/Q/E/L/E) | 198.53 | 629.0001 | 1884.991 | -0.0056 | -2.9 | 4.09 | 28616.1  | 5.68 HUMAN  | EP9PU  | Euplakin                                                                    |
| 14063 | dirMS_041712_NAR_20mM_plus.18806.18806.2   | 2   | 8.28 | 0.237E+05 | (K)LAIFAL(K)R/F/P/L/S/L/D/G/D/L/G/R/E)         | 200.48 | 793.9214 | 1586.338 | -0.0029 | -1.1 | 4.03 | 24286.7  | 4.89 HUMAN  | ES6A2  | Creatine kinase B-type (Fragment)                                           |
| 14064 | dirMS_041712_NAR_30mM_plus.13467.13469.2   | 2   | 8.28 | 0.115E+06 | (R)ITLMMG(R)T/I/L)M/M/G/R/G)                   | 124.67 | 411.226  | 821.437  | 0.0075  | 3.2  | 9.41 | 96306.4  | 6.41 HUMAN  | P13639 | Elongation factor 2                                                         |
| 14065 | dirMS_041712_NAR_30mM_plus.18700.18700.2   | 2   | 8.28 | 0.637E+05 | (R)SYNDEI(R)S/Y/N/D/EL/Q/F/L/E/K/I)            | 152.13 | 693.335  | 1385.658 | 0.0044  | 3.2  | 4.14 | 19338.9  | 5.33 HUMAN  | E7C059 | tRNA-splicing ligase RtcB homolog                                           |
| 14066 | dirMS_041712_NAR_40mM_plus.10459.10459.2   | 2   | 8.28 | 0.940E+04 | (K)IGGIVG(K)G/G/G/V/G/P/P/G/R/V)               | 125.75 | 513.3081 | 1025.611 | -0.0013 | -1.2 | 9.75 | 50482.3  | 9.31 HUMAN  | P68104 | Winged factor 1-alpha 1                                                     |
| 14067 | dirMS_041712_NAR_40mM_plus.16166.16166.3   | 3   | 8.28 | 0.411E+04 | (K)GYSLGG(K)N/V/L/S/L/C/D/C/H/G/V/E/S/K/S)     | 160.37 | 600.3172 | 1798.937 | 0.0003  | 0.2  | 5.32 | 52440.1  | 6 HUMAN     | RW9N3  | Cleavage and polyadenylation-specificity factor subunit 6                   |
| 14068 | dirMS_041712_NAR_50mM_plus.10011.10011.3   | 3   | 8.28 | 2.404E+04 | (R)KIDM(G)G/L/G/L/P/G/D/A/G/R/E)               | 119.47 | 428.6199 | 1311.777 | -0.0019 | -1.1 | 5.13 | 77799.7  | 4.73 HUMAN  | HS0072 | Heterogeneous nuclear ribonucleoprotein M                                   |
| 14069 | dirMS_041712_NAR_50mM_plus.11024.11024.3   | 3   | 8.28 | 1.372E+05 | (K)IQLAQE(K)A/E/Q/A/E/R/Y/D/M/A/C/M/K/S)       | 125.2  | 634.6126 | 1901.819 | 0.0042  | 2.2  | 4.32 | 5919.6   | 4.73 HUMAN  | ESR61E | 14-3-3 protein zeta/delta (Fragment)                                        |
| 14070 | dirMS_041712_NAR_50mM_plus.120811.20811.3  | 3   | 8.28 | 0.227E+05 | (K)ISQHQI(K)H/S/Q/F/G/V/P/L/T/V/E/V/K/E)       | 178.9  | 593.6536 | 1778.948 | -0.0013 | -0.8 | 6.75 | 20151.2  | 4.58 HUMAN  | G3V28  | Heat shock protein HSP 90-alpha (Fragment)                                  |
| 14071 | dirMS_041712_NAR_50mM_plus.22051.22051.3   | 3   | 8.28 | 1.577E+05 | (K)AGFLD(K)A/G/V/F/L/D/L/K/F/L/P/K)            | 188.87 | 455.2587 | 1363.762 | -0.0005 | -0.3 | 6    | 260187.7 | 6.1 HUMAN   | Q3TUC6 | Talin 1                                                                     |
| 14072 | dirMS_041712_NAR_50mM_plus.8124.8124.3     | 3   | 8.28 | 0.126E+05 | (K)QLAVL(K)I/L/A/V/A/E/G/K/P/E/A/P/K)          | 109.72 | 478.9314 | 1374.795 | -0.0086 | -6   | 6.14 | 24364.9  | 9.64 HUMAN  | HW090  | Methionine-tRNA ligase, cytoplasmic (Fragment)                              |
| 14073 | dirMS_041712_NAR_60mM_plus.14643.14643.3   | 3   | 8.28 | 1.527E+05 | (K)NKDQGI(K)K/Q/G/T/G/T/V/D/V/E/G/L/G)         | 133.25 | 596.2816 | 1786.244 | 0.006   | 3.4  | 6.12 | 26991.7  | 5.01 HUMAN  | B7284  | Mysin light polypeptide 6                                                   |
| 14074 | dirMS_041712_NAR_120mM_minus.14652.14652.4 | 4   | 8.27 | 1.242E+05 | (K)PJSHEE(K)P/S/H/E/I)A)M/T/V/L/R/R/T)         | 133.6  | 462.7415 | 1831.948 | 15.9958 | 0.5  | 6.76 | 39795.8  | 9.08 HUMAN  | H8Q0A  | Fructose-bisphosphate aldolase                                              |
| 14075 | dirMS_041712_NAR_120mM_minus.5601.5601.3   | 3   | 8.27 | 1.123E+05 | (K)ICDSSP(K)C/DV/S/P/D/S/A/E/D/V/R/V/K)        | 83.98  | 489.2132 | 1465.622 | 0.0027  | 1.8  | 4.23 | 40122.7  | 5.43 HUMAN  | PO2765 | Alpha-2-HS-glycoprotein                                                     |
| 14076 | dirMS_041712_NAR_30mM_minus.18187.18187.2  | 2   | 8.27 | 0.701E+04 | (R)SYNDEI(R)S/Y/N/D/EL/Q/F/L/E/K/I)            | 153.58 | 693.3327 | 1385.658 | -0.0002 | -0.2 | 4.4  | 19338.9  | 5.33 HUMAN  | E7C059 | tRNA-splicing ligase RtcB homolog                                           |
| 14077 | dirMS_041712_NAR_30mM_minus.18828.18828.2  | 2   | 8.27 | 0.454E+05 | (R)SEDFTR(R)R/T/V)G/A/P/R/R)                   | 157.42 | 615.3038 | 1229.598 | 0.002   | 1.6  | 6    | 42831.5  | 4.86 HUMAN  | AK854  | HCC138550L isoform CRA_1                                                    |
| 14078 | dirMS_041712_NAR_30mM_minus.9491.9491.2    | 2   | 8.27 | 0.494E+05 | (K)EJSEAL(K)E/L/S/E/L/T/R/H)                   | 106.03 | 459.7452 | 918.489  | -0.006  | -6.5 | 4.53 | 83905.8  | 6.62 HUMAN  | P41250 | Glycine-tRNA ligase                                                         |
| 14079 | dirMS_041712_NAR_50mM_minus.10869.10869.3  | 3   | 8.27 | 1.627E+03 | (K)EIALQP(K)E/L/A/L/Q/D/P/D/V/D/R/A)           | 129.33 | 504.6068 | 1511.806 | -0.006  | -0.4 | 4.23 | 83905.8  | 6.62 HUMAN  | P41250 | Glycine-tRNA ligase                                                         |
| 14080 | dirMS_041712_NAR_50mM_minus.12854.12854.3  | 3   | 8.27 | 0.413E+06 | (K)IPPEHG(K)P/P/P/E)G/I/T/N/W/D)M/E/K/I)       | 141.63 | 659.6398 | 1960.911 | 15.9939 | -0.5 | 4.31 | 32616.5  | 5.18 HUMAN  | AKN176 | Actin, alpha skeletal muscle                                                |
| 14081 | dirMS_041712_NAR_50mM_minus.17601.17601.3  | 3   | 8.27 | 2.466E+05 | (R)LLDQGR(K)I/L/D/L/D/A/P/L/H/K)               | 168.5  | 458.6218 | 1373.852 | -0.0007 | -1.1 | 5.74 | 16469.8  | 8 HUMAN     | E7K47  | Haloacid dehalogenase-like hydrolase domain-containing protein 2 (Fragment) |
| 14082 | dirMS_041712_NAR_50mM_minus.17802.17802.3  | 3   | 8.27 | 0.307E+05 | (K)HGNQLP(K)H/N/L/Q/P/LV)I/F/E)G/T/A/P/K/I)    | 170.02 | 655.6843 | 1965.044 | -0.0057 | -2.9 | 5.4  | 51524.1  | 4.82 HUMAN  | FSH812 | Protein disulfide-isomerase                                                 |
| 14083 | dirMS_041712_NAR_50mM_minus.21658.21658.2  | 2   | 8.27 | 0.356E+04 | (K)AGFAGC(G)A/G/F/A/G/D)P/A/R/K)               | 97.78  | 488.7293 | 976.448  | 0.0031  | 3.1  | 4.21 | 123097.1 | 5.83 HUMAN  | ASA3E0 | POTE ankyrin domain family member F                                         |
| 14084 | dirMS_041712_NAR_50mM_minus.9005.9005.3    | 3   | 8.27 | 1.113E+04 | (K)TGVLEI(K)T/LQ/D/V)T/E/M/D/S/V/K/E)          | 119.4  | 512.9962 | 1535.773 | 0.0017  | 0.4  | 4.68 | 589007.1 | 5.44 HUMAN  | FS8107 | Euplakin                                                                    |
| 14085 | dirMS_041712_NAR_50mM_minus.974.974.3      | 3   | 8.27 | 0.251E+05 | (K)TGVLEI(K)T/LQ/D/V)T/E/M/D/S/V/K/E)          | 119.4  | 512.9962 | 1535.773 | 0.0017  | 0.4  | 4.68 | 589007.1 | 5.44 HUMAN  | FS8107 | Euplakin                                                                    |
| 14086 | dirMS_041712_NAR_60mM_minus.12789.12789.3  | 3   | 8.27 | 1.228E+05 | (K)ITVW(K)K)T/V)K/L/S/E/L)G/S/V/R/T)           | 130.95 | 468.9723 | 1044.769 | -0.0019 | -1.4 | 5.74 | 53377.8  | 5.14 HUMAN  | Q15149 | Plectin                                                                     |
| 14087 | dirMS_041712_NAR_60mM_minus.13693.13693.3  | 3   | 8.27 | 0.450E+05 | (R)ANJAP(R)N)P/Q/G/V/F/P/H/K/H)                | 135.95 | 459.0265 | 1377.644 | 0.0012  | 0.9  | 8.8  | 83273.6  | 5.55 HUMAN  | P13010 | X-ray repair cross-complementing protein 5                                  |
| 14088 | dirMS_041712_NAR_60mM_minus.6989.6989.3    | 3   | 8.27 | 1.361E+05 | (K)LDREAR(K)D)E/R/E/A/G/E/T/V/K/E)             | 98.2   | 420.8852 | 1260.643 | -0.002  | -1.6 | 4.41 | 31075.7  | 5.65 HUMAN  | P60174 | Triosephosphate isomerase                                                   |
| 14089 | dirMS_041712_NAR_60mM_minus.8520.8520.3    | 3   | 8.27 | 0.337E+05 | (R)K)E)S)A)R)N)E)E)S)A)R)N)E)E)S)A)R)          | 103.8  | 463.5419 | 1402.819 | -0.0007 | -1.1 | 5.4  | 33421.2  | 6.02 HUMAN  | P15024 | Desmoplakin                                                                 |
| 14090 | dirMS_041712_NAR_120mM_plus.8926.8926.2    | 2   | 8.27 | 0.637E+05 | (K)H)VALS(K)H)F/A/V)G/T/T)T)T)K/V)             | 99.88  | 609.8311 | 1218.648 | 0.0072  | 0.6  | 8.76 | 63374.2  | 8.64 HUMAN  | PK6744 | Glucose-6-phosphate isomerase                                               |
| 14091 | dirMS_041712_NAR_20mM_plus.17567.17567.2   | 2   | 8.27 | 1.128E+05 | (K)JLATQS(K)A/L/T/Q)S)N/L)P)V)T/F)S)R/A)       | 193.23 | 513.4986 | 1905.992 | -0.0017 | -0.9 | 4.53 | 3888.3   | 5 HUMAN     | C9338  | Heat shock protein beta-1                                                   |
| 14092 | dirMS_041712_NAR_20mM_plus.6538.6538.2     | 2   | 8.27 | 0.142E+05 | (R)IGASGA(R)G/A/G/S)A)G)A)S)P)K/E)             | 106.88 | 537.277  | 1073.559 | -0.0118 | -1.1 | 8.75 | 34423.1  | 6.44 HUMAN  | P15924 | Desmoplakin                                                                 |
| 14093 | dirMS_041712_NAR_30mM_plus.21182.21182.2   | 2   | 8.27 | 0.285E+05 | (R)FDAMP(R)F/D)A)M/P/T)L)R/A)                  | 166.32 | 549.276  | 1079.575 | -0.0001 | -0.1 | 5.84 | 42088    | 5.39 HUMAN  | FBV78  | Proliferator-associated protein 2G4                                         |
| 14094 | dirMS_041712_NAR_40mM_plus.15105.15105.3   | 3   | 8.27 | 0.287E+05 | (K)QVTKG(K)E)Y/T)G)G)A/T)G)G)P)K)C)K/I)        | 156.07 | 464.868  | 1872.041 | 0.0007  | 1.8  | 10   | 91839.6  | 9.02 HUMAN  | BA4390 | ATP-citrate lyase                                                           |
| 14095 | dirMS_041712_NAR_50mM_plus.10967.10967.3   | 3   | 8.27 | 0.639E+04 | (K)M)M)M)G)M)M)Q/Q/D)G/P)G)T)A)D)K)P)R/I)      | 125.3  | 657.663  | 1970.979 | -0.0042 | -2.1 | 5.71 | 70034.8  | 6.89 HUMAN  | BD4731 | Far upstream element-binding protein 1                                      |
| 14096 | dirMS_041712_NAR_50mM_plus.7031.7031.3     | 3   | 8.27 | 1.600E+05 | (K)IVADQ(K)M)J)A)D)X)D)S)Y)T)A)N)S)K/I)        | 101.95 | 504.2628 | 1510.775 | -0.0009 | -0.6 | 5.96 | 25445.8  | 5.52 HUMAN  | ABM5W0 | L-lactate dehydrogenase (Fragment)                                          |
| 14097 | dirMS_041712_NAR_60mM_plus.11578.11578.3   | 3   | 8.27 | 1.125E+06 | (K)F)G)W)G)G)Q)Q)N)K)E)D)I)P)T)S)R/I)          | 117.23 | 530.2507 | 1588.739 | -0.0015 | -0.9 | 6.07 | 87447.6  | 6.44 HUMAN  | Q15347 | Protein transport protein Sec28B                                            |
| 14098 | dirMS_041712_NAR_60mM_plus.14578.14578.3   | 3   | 8.27 | 7.026E+07 | (R)E)S)A)R)N)E)E)S)A)R)N)E)E)S)A)R)            | 103.8  | 463.5419 | 1402.819 | -0.0007 | -1.1 | 5.4  | 33421.2  | 6.02 HUMAN  | G3V28  | Heat shock protein HSP 90-alpha (Fragment)                                  |
| 14099 | dirMS_041712_NAR_60mM_plus.18060.18060.3   | 3   | 8.27 | 1.497E+04 | (R)J)SEAR(R)A/R)F)E)A)D)P)A)R)F)R/I)           | 91.58  | 494.2554 | 1048.754 | 0.0027  | -1.8 | 4.68 | 45508.6  | 5.5 HUMAN   | AKR7Q2 | Heat shock cognate 71 kDa protein                                           |
| 14100 | dirMS_041712_NAR_60mM_plus.19916.19916.3   | 3   | 8.27 | 1.146E+05 | (R)SE)LTU(R)S)E)I)E/L)Q)K)E/L)Q)R/S)           | 163.83 | 538.9738 | 1614.906 | 0.0007  | 0.5  | 4.78 | 53377.8  | 5.14 HUMAN  | Q15149 | Plectin                                                                     |
| 14101 | dirMS_041712_NAR_60mM_plus.20152.20152.3   | 3   | 8.27 | 1.674E+04 | (K)KS)VEEV(K)S)S)E)E)A)S)E)I)Q)P)R/L/E)        | 165.4  | 577.9775 | 1731.928 | -0.0096 | -5.6 | 4.79 | 33423.1  | 6.44 HUMAN  | P15924 | Desmoplakin                                                                 |
| 14102 | dirMS_041712_NAR_120mM_minus.14359.14359.4 | 4   | 8.26 | 1.115E+05 | (R)E)T)N)D)S)R)T)K)L)S)D)P)A)R)F)S)K)R/I)      | 132.23 | 456.892  | 1242.945 | -0.0012 | -0.6 | 5.38 | 53307.8  | 5.96 HUMAN  | PK6070 | 26S protease regulatory subunit 4                                           |
| 14103 | dirMS_041712_NAR_120mM_minus.5647.5647.3   | 3   | 8.26 | 1.123E+05 | (K)ICDSSP(K)C/DV/S/P/D/S/A/E/D/V/R/V/K)        | 83.98  | 489.2132 | 1465.622 | 0.0027  | 1.8  | 4.23 | 40122.7  | 5.43 HUMAN  | PO2765 | Alpha-2-HS-glycoprotein                                                     |
| 14104 | dirMS_041712_NAR_20mM_minus.12016.12016.2  | 2   | 8.26 | 0.508E+05 | (R)J)T)VS)R)T)R)V)Q)S)L)E)A)D)M)S)R)N)         | 169.92 | 761.8733 | 1506.747 | 15.9925 | -1.6 | 4.03 | 43773.3  | 5.26 HUMAN  | FBV29  | Keratin, type I cytoskeletal 18                                             |
| 14105 | dirMS_041712_NAR_30mM_minus.14359.14359.2  | 2   | 8.26 | 0.226E+05 | (K)G)F)T)S)E)R)G)I)F)T)S)E)G)T)K/I)            | 131.88 | 526.7803 | 1052.562 | -0.0089 | -8.5 | 6    | 470342.8 | 6.83 HUMAN  | E7L7U0 | RNA-dependent protein kinase catalytic subunit                              |
| 14106 | dirMS_041712_NAR_30mM_minus.18245.18245.2  | 2   | 8.26 | 0.812E+04 | (K)IS)J)H)S)K)C)I)D)G)I)F)A)G)S)R/I)           | 153.88 | 559.7501 | 1118.494 | -0.0006 | -0.5 | 5.55 | 42983.3  | 5.19 HUMAN  | P33227 | Serpin B6                                                                   |
| 14107 | dirMS_041712_NAR_40mM_minus.11214.11214.3  | 3   | 8.26 | 1.121E+05 | (R)K)IDM)P)A)T(K)G)I)G)P)A)R)D)I)K/I)          | 149.38 | 571.9828 | 1713.939 | -0.0043 | -2.5 | 4.47 | 42755    | 6.81 HUMAN  | HS8254 | T-complex protein 1 subunit delta                                           |
| 14108 | dirMS_041712_NAR_50mM_minus.11417.11417.3  | 3   | 8.26 | 1.531E+04 | (K)I)D)S)G)I(K)I)D)S)G)I)E)A)D)D)R)I)N)K/V)    | 133.63 | 591.6389 | 1772.902 | -0.0003 | -0.2 | 4.04 | 11664.7  | 4.42 HUMAN  | PO5387 | 60S acidic ribosomal protein P2                                             |
| 14109 | dirMS_041712_NAR_50mM_minus.17095.17095.3  | 3</ |      |           |                                                |        |          |          |         |      |      |          |             |        |                                                                             |



|       |                                            |   |      |   |                |                                                       |                            |        |          |          |         |       |      |          |       |       |         |                                                                                  |
|-------|--------------------------------------------|---|------|---|----------------|-------------------------------------------------------|----------------------------|--------|----------|----------|---------|-------|------|----------|-------|-------|---------|----------------------------------------------------------------------------------|
| 14275 | dirMS_041712_NAR_60mM_minus.8742.8742.3    | 3 | 8.19 | 1 | 8.60E-04       | (R)FVQKQD(R)F V K Q D Q I(V)C(I)A(R)L                 | C:Carbamidomethylation     | 10842  | 455.2427 | 1363.715 | -0.0015 | -1.1  | 8.75 | 534581.1 | 5.47  | HUMAN | EBR35   | Eukaryotic peptide chain release factor GTP-binding subunit ERFB3 (Fragment)     |
| 14276 | dirMS_041712_NAR_120mM_plus.9703.9703.3    | 3 | 8.19 | 1 | 9.78E-05       | (R)STGKGR(K)R T G K V I V E F A S K/P(A)A/R(K)        |                            | 10422  | 540.2979 | 1644.891 | -0.0135 | -8.3  | 9.99 | 76562.2  | 9.53  | HUMAN | P23246  | Splicing factor, proline- and glutamine-rich                                     |
| 14277 | dirMS_041712_NAR_20mM_plus.10278.10278.2   | 2 | 8.19 | 0 | 9.56E-04       | (K)EAEAT(K)E I A L E I G V L P A P R(K)               |                            | 14428  | 517.8517 | 1497.057 | -0.0054 | -4.4  | 4.79 | 102255.8 | 4.91  | HUMAN | Q9Y554  | Keratin, type II cytoskeletal 10                                                 |
| 14278 | dirMS_041712_NAR_20mM_plus.10785.10785.2   | 2 | 8.19 | 0 | 2.19E-05 M33m  | (K)MDEAT(K)K V A I V D/E/V F A E R(E)N                | m:Disulfide methionine     | 10428  | 732.3555 | 1447.71  | 15.994  | -0.6  | 4    | 10949.3  | 5.28  | HUMAN | BA04162 | 14-3-3 protein epsilon                                                           |
| 14279 | dirMS_041712_NAR_20mM_plus.17813.17813.2   | 2 | 8.19 | 0 | 8.16E-04       | (K)VNIIPIA(K)V(N)I/P(I)A(K)                           |                            | 19462  | 490.8283 | 980.65   | -0.0021 | -1    | 8.72 | 51212    | 5.84  | HUMAN | ANF093  | Septin-8                                                                         |
| 14280 | dirMS_041712_NAR_40mM_plus.17699.17699.3   | 3 | 8.19 | 1 | 2.12E-05       | (K)ITGSDV(K)G I V S D V F A K/N D L A V V D V D(R)    |                            | 16972  | 640.3451 | 1919.023 | -0.0025 | -1.3  | 4.43 | 76670.1  | 6.4   | HUMAN | P19338  | Nucleolin                                                                        |
| 14281 | dirMS_041712_NAR_50mM_plus.10233.10233.3   | 3 | 8.19 | 1 | 5.63E-05 S34s  | (R)AGSDV(K)R(Q)I K V Y V F A F E E T(K)               |                            | 120.2  | 513.9672 | 1538.833 | -0.0094 | -5.4  | 4.79 | 102255.8 | 4.91  | HUMAN | Q9Y554  | Protocadherin gamma-A9                                                           |
| 14282 | dirMS_041712_NAR_50mM_plus.14043.14043.3   | 3 | 8.19 | 1 | 5.38E-05       | (K)GGVELV(K)G E L I V W T D S L A R D V F(E)K(A)      | n:Karyopherin(S)           | 14168  | 638.9735 | 1914.909 | -0.002  | -1.1  | 4.18 | 533778   | 5.74  | HUMAN | Q15149  | Plectin                                                                          |
| 14283 | dirMS_041712_NAR_50mM_plus.18088.18088.3   | 3 | 8.19 | 2 | 3.44E-05 S717s | (R)YVQDPR(R)P/Q/R/G/D T V E A R A(K)K(I)              | m:Disulfide methionine (S) | 16312  | 626.6508 | 1674.881 | -0.0023 | -1.2  | 8.5  | 82720.6  | 6.41  | HUMAN | P54802  | Alpha-N-acetylglucosaminidase                                                    |
| 14284 | dirMS_041712_NAR_50mM_plus.8235.8351.3     | 3 | 8.19 | 1 | 3.49E-05       | (R)IVAEVAE(R)I/V/A/E/K N P A D P(L)K(I)               |                            | 110.53 | 451.2563 | 1351.758 | -0.0036 | -12.7 | 6.04 | 96306.4  | 6.41  | HUMAN | P13639  | Elongation factor 2                                                              |
| 14285 | dirMS_041712_NAR_60mM_plus.15346.15346.3   | 3 | 8.19 | 0 | 4.82E-04       | (K)HVLVYS(K)I G V L V Y S G W(G)P D(Y)R(V)            |                            | 135.85 | 522.2648 | 1564.758 | 0.0222  | -14.2 | 6.74 | 26012.2  | 6.92  | HUMAN | P25787  | Proteasome subunit alpha type-2                                                  |
| 14286 | dirMS_041712_NAR_60mM_plus.19472.19472.3   | 3 | 8.19 | 0 | 1.33E-05       | (R)KIVKWT(K)R(N)S V F L L P(K)                        |                            | 161.3  | 483.248  | 1402.70  | -0.0016 | -1.1  | 6.75 | 207569.3 | 6.92  | HUMAN | Q12760  | Acetyl-CoA carboxylase 1                                                         |
| 14287 | dirMS_041712_NAR_60mM_plus.5674.5674.3     | 3 | 8.19 | 1 | 1.91E-05       | (R)SSISGGG(R)S S E/G V Y S G D R S G G Y G D V(S)R(S) |                            | 8087   | 583.5777 | 1748.722 | -0.0033 | -1.9  | 5.68 | 21563.9  | 10.01 | HUMAN | K7E82   | TATA-binding protein-associated factor 2(N) (Fragment)                           |
| 14288 | dirMS_041712_NAR_120mM_minus.19983.19983.3 | 3 | 8.18 | 1 | 2.47E-05       | (R)KAFEEEL(R)A K E F E L Y M/D(L)R(F)R(S)             |                            | 164.85 | 504.9216 | 1512.752 | -0.0013 | -0.8  | 4.68 | 72445.7  | 5.07  | HUMAN | P10221  | 78 kDa glucose-regulated protein                                                 |
| 14289 | dirMS_041712_NAR_120mM_minus.6563.6563.3   | 3 | 8.18 | 1 | 3.19E-05       | (R)ILNLTG(L)R(N)I D T G R E D D(N)R(R)                |                            | 90.27  | 344.8888 | 1302.64  | 0.0032  | -2.4  | 4.56 | 46648.4  | 9.67  | HUMAN | BA04242 | Splicing factor 1                                                                |
| 14290 | dirMS_041712_NAR_20mM_plus.13281.13281.2   | 2 | 8.18 | 0 | 7.86E-04       | (K)SLVPTV(K)S L F I V P T S A P R(K)                  |                            | 183.45 | 594.3419 | 1617.678 | -0.0034 | -2.8  | 9.47 | 92752.5  | 4.76  | HUMAN | P74625  | Endoplasmic reticulum protein                                                    |
| 14291 | dirMS_041712_NAR_20mM_minus.7987.7987.2    | 2 | 8.18 | 0 | 4.16E-04       | (K)VVVTDQ(K)V V I V T D T E T L A R I(Q)              |                            | 129.38 | 674.8314 | 1348.659 | -0.0035 | -2.6  | 3.91 | 36396.8  | 5.02  | HUMAN | P05198  | Eukaryotic translation initiation factor 2 subunit 1                             |
| 14292 | dirMS_041712_NAR_50mM_minus.16534.16534.3  | 3 | 8.18 | 0 | 1.77E-05       | (R)GGVW(L)R(G) G V V V L M G I T Y I G D L T(K)       |                            | 161.78 | 535.9583 | 1605.863 | -0.0032 | -2    | 6.74 | 30427.2  | 7.21  | HUMAN | H8BPX7  | Alanine--tRNA ligase, cytoplasmic (Fragment)                                     |
| 14293 | dirMS_041712_NAR_50mM_plus.16580.16580.3   | 3 | 8.18 | 1 | 9.23E-04       | (R)IDSEQVA(R)I S D V A Q V A E L K Q E L A T I(K)S    |                            | 163.05 | 601.3217 | 1801.954 | -0.0036 | -2    | 4.41 | 109459.8 | 4.94  | HUMAN | FSG078  | General vesicular transport factor p115                                          |
| 14294 | dirMS_041712_NAR_50mM_minus.18885.18885.3  | 3 | 8.18 | 1 | 2.06E-06       | (R)ILJLLE(L)R(V)A L V L E V S G Q(R)R(M)              |                            | 183.82 | 461.6289 | 1382.873 | -0.0008 | -0.6  | 8.75 | 280326.9 | 5.48  | HUMAN | Q75369  | Filamin-B                                                                        |
| 14295 | dirMS_041712_NAR_60mM_plus.14722.14722.3   | 3 | 8.18 | 1 | 2.09E-05       | (R)KIKJSDG(R)K I G D P L I A L E D Y T(R)R            |                            | 142.92 | 457.2595 | 1369.769 | -0.0046 | -3.4  | 4.56 | 47309.6  | 5.42  | HUMAN | BA0XV7  | 4-trimethylaminobutylaldehyde dehydrogenase                                      |
| 14296 | dirMS_041712_NAR_60mM_plus.16373.16373.3   | 3 | 8.18 | 1 | 1.44E-05       | (K)KLSLTA(L)K(K) L S T I A L A I L G V E I(R)T        |                            | 151.45 | 457.6153 | 1370.837 | -0.0052 | -3.8  | 8.75 | 52669.1  | 6.73  | HUMAN | AMBYE7  | Serine/threonine-protein phosphatase 2A 65 kDa regulatory subunit A beta isoform |
| 14297 | dirMS_041712_NAR_60mM_minus.17166.17166.3  | 3 | 8.18 | 1 | 3.63E-05       | (K)KAFSPD(K)R A P S D I V Q I V L A(K)                |                            | 156.17 | 463.6095 | 1388.815 | -0.0008 | -0.6  | 8.5  | 2193     | 5.96  | HUMAN | EP9137  | Calpain-1 catalytic subunit (Fragment)                                           |
| 14298 | dirMS_041712_NAR_60mM_minus.7331.7331.3    | 3 | 8.18 | 1 | 6.21E-05 M135m | (K)KIVKGM(K)K K E G N V I V V E A E M(R)P             | m:Disulfide methionine     | 100.3  | 513.25   | 1505.745 | 15.9940 | -4.0  | 4.79 | 18240.4  | 7.94  | HUMAN | PE6237  | Peptidyl-prolyl cis-trans isomerase A                                            |
| 14299 | dirMS_041712_NAR_20mM_plus.13601.13601.2   | 2 | 8.18 | 0 | 3.22E-05 M148m | (R)DLTVV(R)D L I D T L V Q I V C(K)                   | m:Disulfide methionine     | 165.17 | 507.749  | 998.468  | -0.0016 | -0.7  | 4.21 | 37482.1  | 5.36  | HUMAN | EP9030  | Actin, gamma-enteric smooth muscle                                               |
| 14300 | dirMS_041712_NAR_20mM_plus.18409.18409.2   | 2 | 8.18 | 0 | 1.22E-05       | (R)GVQVQ(L)R V V Q V I E L Q/Q A I A S(K)L            |                            | 198.05 | 605.3566 | 1299.727 | -0.0028 | -2.1  | 6    | 22489.6  | 5.38  | HUMAN | EP9139  | Elongation factor 1-delta (Fragment)                                             |
| 14301 | dirMS_041712_NAR_30mM_plus.4476.4476.2     | 2 | 8.18 | 0 | 2.94E-05       | (K)EDAAAN(K)E D I A A N N Y A R(K)                    |                            | 72.85  | 512.2811 | 1023.449 | -0.0001 | -0.1  | 4.37 | 50706.6  | 5.68  | HUMAN | ANHL42  | Tubulin alpha chain-like 3                                                       |
| 14302 | dirMS_041712_NAR_30mM_plus.9357.9357.2     | 2 | 8.18 | 0 | 2.53E-05       | (R)ILJLLE(L)R(V)A L V L E V S G Q(R)R(M)              |                            | 101.5  | 494.2566 | 987.511  | -0.0046 | -4.7  | 4.25 | 67933    | 6.08  | HUMAN | P26038  | Moesin                                                                           |
| 14303 | dirMS_041712_NAR_40mM_plus.17487.17487.3   | 3 | 8.18 | 0 | 3.47E-04       | (R)KIVKWT(K)R(N)S V F L L P(K)                        |                            | 169.43 | 456.288  | 1349.99  | -0.0019 | -1.1  | 6.75 | 207569.3 | 6.92  | HUMAN | Q12760  | Acetyl-CoA carboxylase 1                                                         |
| 14304 | dirMS_041712_NAR_50mM_plus.10992.10992.3   | 3 | 8.18 | 1 | 2.95E-06       | (R)VICVEAE(R)I V C E L V A I V L A I L G V E I(R)T    | C:Carbamidomethylation     | 125.03 | 462.9247 | 1386.766 | -0.0066 | -4.7  | 6.11 | 21927.8  | 9.55  | HUMAN | HK046   | 60S ribosomal protein S17 (Fragment)                                             |
| 14305 | dirMS_041712_NAR_50mM_plus.11118.11118.3   | 3 | 8.18 | 0 | 1.68E-05       | (K)QADGGR(K)A Q D V G R F P P K V(Q)K(S)              |                            | 125.2  | 448.2419 | 1342.711 | -0.0002 | -0.2  | 6    | 15633.5  | 9.15  | HUMAN | H8BMQ8  | Fructose-bisphosphate aldolase A (Fragment)                                      |
| 14306 | dirMS_041712_NAR_50mM_plus.14430.14430.3   | 3 | 8.18 | 0 | 1.56E-06       | (K)SLTNDW(K)S L T N D I W E D H V A V(K)H             |                            | 143.63 | 509.9193 | 1527.744 | -0.0005 | -0.3  | 4.53 | 85057.6  | 4.94  | HUMAN | PO7900  | Heat shock protein HSP 90-alpha                                                  |
| 14307 | dirMS_041712_NAR_50mM_plus.15313.15313.3   | 3 | 8.18 | 1 | 5.61E-04       | (R)I V L V E A S A I A 408.727.0004                   |                            | 151.8  | 468.5948 | 1408.727 | -0.0019 | -1.6  | 7.31 | 180459.5 | 7.31  | HUMAN | Q9Y554  | Propionyl-CoA carboxylase alpha chain, mitochondrial                             |
| 14308 | dirMS_041712_NAR_50mM_plus.16390.16390.3   | 3 | 8.18 | 0 | 3.28E-04       | (R)IEVLDL(R)E V I D I L L A L K P D Q V E G I G R(K)  |                            | 154.37 | 608.6724 | 1824.011 | -0.0087 | -4.7  | 4.32 | 135657.7 | 5.52  | HUMAN | Q8M4P2  | Kinecin                                                                          |
| 14309 | dirMS_041712_NAR_50mM_plus.1750.1750.3     | 3 | 8.18 | 1 | 3.91E-04       | (R)IVEQDT(R)I V I E Q T M P P R I G R(K)              |                            | 108.57 | 490.5973 | 1469.778 | -0.0007 | -0.5  | 6.07 | 73386.6  | 8.73  | HUMAN | BA0XX7  | ATP-dependent RNA helicase DDX3Y                                                 |
| 14310 | dirMS_041712_NAR_60mM_plus.13294.13294.3   | 3 | 8.18 | 1 | 5.17E-05       | (R)JRDTEU(R)I D D R V V Y A A Q C Q I(K)S             | C:Carbamidomethylation     | 125.82 | 504.5817 | 1511.735 | -0.0039 | -2.6  | 5.96 | 141616.6 | 6.1   | HUMAN | ET2X1M  | Protein transport protein Sec24B                                                 |
| 14311 | dirMS_041712_NAR_60mM_plus.18257.18257.3   | 3 | 8.18 | 1 | 2.20E-05       | (R)ARTEFL(R)I A R V S A I L C V S L D L R(S)          | C:Carbamidomethylation     | 152.5  | 514.9194 | 1542.737 | 0.0067  | -4.3  | 4.68 | 25598.3  | 6.45  | HUMAN | FT73H   | Heat shock 70 kDa protein 1A/1B                                                  |
| 14312 | dirMS_041712_NAR_60mM_plus.20098.20098.3   | 3 | 8.18 | 1 | 4.21E-04       | (K)KIVKWT(K)R(N)S V F L L P(K)                        |                            | 166.93 | 452.6004 | 1355.789 | -0.0026 | -2    | 6.07 | 13786.8  | 9.93  | HUMAN | BTZ651  | Transcription elongation factor A protein 1                                      |
| 14313 | dirMS_041712_NAR_60mM_plus.6780.6780.2     | 2 | 8.18 | 1 | 1.07E-06       | (K)HTQGR(K)K T G Q I A P G Y S Y T A A N(K)           |                            | 94.03  | 778.881  | 1556.77  | -0.0014 | -0.9  | 9.53 | 11447.2  | 9.81  | HUMAN | C9JF87  | Cytrochrome c (Fragment)                                                         |
| 14314 | dirMS_041712_NAR_120mM_minus.12255.12294.3 | 3 | 8.17 | 0 | 2.03E-04       | (K)SLVTDQ(K)V L S V N D I P L V G I R(S)              |                            | 103.75 | 402.8907 | 1206.659 | -0.0014 | -1.2  | 6.74 | 26123.4  | 7.07  | HUMAN | EP9H29  | Thioredoxin-dependent peroxide reductase, mitochondrial                          |
| 14315 | dirMS_041712_NAR_120mM_minus.8517.8517.3   | 3 | 8.17 | 1 | 4.92E-05       | (R)KIVTEG(R)I K V T E V G E P P Y R(K)                |                            | 100.45 | 416.885  | 1248.658 | -0.0178 | -17.4 | 6.14 | 96827.3  | 5.58  | HUMAN | EP9KU7  | Neurite alpha-3 tubulin class IB                                                 |
| 14316 | dirMS_041712_NAR_20mM_plus.11797.11797.2   | 2 | 8.17 | 0 | 1.57E-05 M88m  | (R)IEVLDL(R)E V I D I L L A L K P D Q V E G I G R(K)  | m:Disulfide methionine     | 149.83 | 608.6724 | 1824.011 | -0.0087 | -4.9  | 4.32 | 135657.7 | 5.52  | HUMAN | Q8M4P2  | Kinecin                                                                          |
| 14317 | dirMS_041712_NAR_20mM_plus.7139.7139.2     | 2 | 8.17 | 0 | 3.67E-05 M88m  | (R)AEAEAS(R)I A E I A S M Y Q V(K)Y                   | m:Disulfide methionine     | 118.07 | 593.2759 | 1169.551 | 15.9938 | -0.9  | 4.53 | 37296.3  | 5.3   | HUMAN | FBV048  | Keratin, type II cytoskeletal B                                                  |
| 14318 | dirMS_041712_NAR_30mM_minus.14350.14649.2  | 2 | 8.17 | 0 | 3.72E-05       | (R)IVDFVNR(R)I V D I F M P M(K)N                      |                            | 132.25 | 475.2457 | 949.481  | 0.003   | 3.1   | 5.81 | 30303.6  | 9.08  | HUMAN | ET8R5   | Phosphoglycerate kinase                                                          |
| 14319 | dirMS_041712_NAR_30mM_plus.15593.15593.2   | 2 | 8.17 | 0 | 1.72E-05       | (K)EILFDR(K)K I I L F W D R(R)                        |                            | 137.77 | 478.2479 | 955.488  | 0.0002  | 0.2   | 4.37 | 59953.2  | 6.14  | HUMAN | G3V184  | NOLL/NOD2/Sun domain family, member 2, isoform CRA_b                             |
| 14320 | dirMS_041712_NAR_30mM_plus.175.175.2       | 2 | 8.17 | 0 | 1.72E-05       | (K)IGFSDV(K)R I D P I G V I V G V P R(R)K             |                            | 150.27 | 509.2252 | 1037.542 | 0.0007  | 1.6   | 5.83 | 15567.6  | 8.53  | HUMAN | HK046   | Adenylate kinase, isoenzyme 1 (Fragment)                                         |
| 14321 | dirMS_041712_NAR_40mM_plus.14054.14054.3   | 3 | 8.17 | 0 | 5.38E-04       | (R)IHFPLA(R)H F L P L A T V A A P I G V A E(K)A       |                            | 167.83 | 586.3246 | 1756.963 | -0.004  | -2.3  | 6.75 | 49012.3  | 4.9   | HUMAN | ANBU1   | Tubulin alpha-4A chain                                                           |
| 14322 | dirMS_041712_NAR_40mM_minus.14126.14126.3  | 3 | 8.17 | 0 | 1.64E-04       | (R)ILJLLE(L)R(V)A L V L E V S G Q(R)R(M)              |                            | 167.47 | 546.333  | 1636.988 | -0.0039 | -2.4  | 6.14 | 13611    | 6.13  | HUMAN | EP9222  | Spectrin beta chain, non-erythrocytic 2 (Fragment)                               |
| 14323 | dirMS_041712_NAR_50mM_minus.10211.10211.3  | 3 | 8.17 | 0 | 1.37E-05       | (K)VGSIDL(K)                                          |                            |        |          |          |         |       |      |          |       |       |         |                                                                                  |





|       |                                          |   |      |                |                                                 |         |          |          |         |       |      |          |             |         |                                                              |
|-------|------------------------------------------|---|------|----------------|-------------------------------------------------|---------|----------|----------|---------|-------|------|----------|-------------|---------|--------------------------------------------------------------|
| 14949 | dirMS_041712_NAR_30mM_minus2.8334.8334   | 2 | 8.1  | 0.459E+05      | (KISFQSSQ)(K)F/Q/Q/S/V/R(D)                     | 100.27  | 520.2591 | 1039.517 | -0.0058 | -5.6  | 9.47 | 100478.9 | 5.71 HUMAN  | ABMX/9  | Genetic vesicular transport factor p115                      |
| 14948 | dirMS_041712_NAR_30mM_minus2.9931.9931   | 2 | 8.1  | 0.111E+05      | (KIQDANS)(K)Q/L/N/S/Q/S/V/E/I/K(L)              | 108.32  | 667.348  | 1333.696 | -0.0071 | -5.3  | 5.72 | 109559.8 | 4.94 HUMAN  | FGFR8   | General vesicular transport factor p115                      |
| 14949 | dirMS_041712_NAR_30mM_minus2.1564.1564   | 2 | 8.1  | 0.190E+05      | (KIGALEE)(K)K/A/E/I/E/I                         | 182.14  | 574.6324 | 1551.213 | -0.0041 | -6.1  | 5.4  | 5218.6   | 6.25 HUMAN  | 215     | proteasome 215S proteasome non-ATPase regulatory subunit 6   |
| 14946 | dirMS_041712_NAR_40mM_minus2.1611.1611   | 3 | 8.1  | 1.657E+05      | (RIENALL)(R)I/L/L/L/G/L/D/A/E/K/D/K(E)G         | 189.625 | 620.0034 | 1884.999 | -0.001  | -1.6  | 4.18 | 2458.8   | 6 HUMAN     | P30041  | Peroleucidin-6                                               |
| 14947 | dirMS_041712_NAR_60mM_minus2.11925.11925 | 3 | 8.1  | 0.192E+05      | (RIJHLUGR)(R)H/L/L/L/G/G/E/P/A(T)               | 126.37  | 402.2384 | 1204.705 | -0.0042 | -3.5  | 6.75 | 99028.8  | 5.32 HUMAN  | OY9768  | Cotoper subunit gamma-1                                      |
| 14948 | dirMS_041712_NAR_60mM_minus2.11956.11956 | 3 | 8.1  | 1.569E+04      | (RIKIKQD)(R)K/Q/L/D/N/V/L/S/A/G/G/A/K(E)        | 126.58  | 557.3237 | 1669.959 | -0.003  | -1.8  | 10   | 53533.6  | 6.01 HUMAN  | Q14204  | Cytoplasmic dynein 1 heavy chain 1                           |
| 14949 | dirMS_041712_NAR_60mM_minus2.1306.1306   | 3 | 8.1  | 5.73E+04 55475 | (RIKADQL)(R)R/A/L/I/L/L/G/E/A/S/L(E)R           | 133.1   | 574.6324 | 1551.213 | -0.0041 | -8.9  | 6.17 | 100478.9 | 6.25 HUMAN  | CRN1C5  | WD repeat-containing protein m5                              |
| 14500 | dirMS_041712_NAR_60mM_minus2.13780.13780 | 3 | 8.1  | 1.178E+06      | (KIEIUDL)(K)E/I/U/D/V/L/D/R/V                   | 179.85  | 452.2739 | 1354.805 | -0.0019 | -1.4  | 4.56 | 58642    | 4.65 HUMAN  | FHS103  | Tubulin alpha-1C chain                                       |
| 14501 | dirMS_041712_NAR_60mM_minus2.5322.5322   | 3 | 8.1  | 1.573E+04      | (KJECDDK)(K)E/D/D/K/G/D/S/C/D/R(Y)              | 82.25   | 542.5547 | 1625.653 | -0.0035 | -2.1  | 4.04 | 28472.4  | 5.71 HUMAN  | P21333  | Filamin-A                                                    |
| 14502 | dirMS_041712_NAR_60mM_minus2.6459.6459   | 3 | 8.1  | 0.361E+05      | (KJAVTQD)(K)A/V/T/E/C/G/H/S/E/E/R(N)            | 94.27   | 533.585  | 1598.741 | -0.0001 | -0    | 4.48 | 28196    | 4.76 HUMAN  | P31946  | 14-3-3 protein beta/alpha                                    |
| 14503 | dirMS_041712_NAR_60mM_minus2.9819.9819   | 3 | 8.1  | 0.793E+05      | (KJGGTQ)(K)I/V/G/E/G/S/H/S/E/R(E)               | 110.85  | 467.8879 | 1403.643 | -0.0064 | 4.6   | 5.4  | 21682.3  | 9.62 HUMAN  | EPH9K7  | Protein HD1                                                  |
| 14504 | dirMS_041712_NAR_60mM_minus2.9838.9838   | 3 | 8.1  | 0.434E+05      | (KJAVLQD)(K)A/V/L/Q/V/E/V/Q/L(E)R               | 114.45  | 446.577  | 1337.711 | -0.0034 | -0.6  | 5.4  | 45721.2  | 5.16 HUMAN  | FGS21.2 | Diablo homolog, mitochondrial (Fragment)                     |
| 14505 | dirMS_041712_NAR_20mM_plus2.15819.15819  | 2 | 8.1  | 0.112E+05      | (R)GTPLSR (R)T/P/L/S/P/L                        | 180.8   | 519.8306 | 1038.656 | -0.0018 | -1.8  | 8.75 | 276046.1 | 6.01 HUMAN  | PA9327  | Fatty acid synthase                                          |
| 14506 | dirMS_041712_NAR_20mM_plus2.17560.17560  | 3 | 8.1  | 0.361E+04 M74m | (R)MAGQ)(R)M/A/G/Q/V/L/D/N/V/L/A/E/P(K)V        | 193.18  | 566.9751 | 1682.915 | -0.0062 | -0.7  | 4.37 | 15791.7  | 9.22 HUMAN  | B4D5U6  | Heterogeneous nuclear ribonucleoproteins C1/C2               |
| 14507 | dirMS_041712_NAR_20mM_plus2.18719.18719  | 2 | 8.1  | 0.832E+04 M80m | (R)APDUL)(R)A/P/L/P/L/V/P/F/G/T/M(R)G           | 200.37  | 747.3751 | 1477.751 | -0.0021 | -1.9  | 5.88 | 81122.9  | 9.03 HUMAN  | H3B28   | Probable ATP-dependent RNA helicase DDX17                    |
| 14508 | dirMS_041712_NAR_20mM_plus2.6343.6343    | 2 | 8.1  | 0.852E+04      | (K)EYVEVA (K)E/V/P/E/A/R(K)                     | 87.3    | 432.2167 | 963.426  | -0.0106 | -12.2 | 4.53 | 17921.1  | 9.14 HUMAN  | HT2626  | Nucleic deacetylase complex subunit SP418 (Fragment)         |
| 14509 | dirMS_041712_NAR_50mM_plus2.15359.15359  | 3 | 8.1  | 0.243E+04      | (K)JALLMLL)(K)V/L/L/L/D/Q/G/S/A/S/P/H/A/A(K)N   | 103.75  | 558.9877 | 1674.954 | -0.0059 | -3.1  | 6.71 | 482683.6 | 6.07 HUMAN  | Q12955  | Aikyri-3                                                     |
| 14510 | dirMS_041712_NAR_50mM_plus2.20386.20386  | 3 | 8.1  | 1.87E+04       | (K)SSVLENF (K)S/V/L/V/L/N/F/V/G/R/D/P/R(Q)G     | 176.78  | 579.3128 | 1735.913 | -0.0113 | 6.5   | 5.79 | 73288.1  | 8.96 HUMAN  | ESRHK8  | Dynamin-3                                                    |
| 14511 | dirMS_041712_NAR_50mM_plus2.8213.8213    | 3 | 8.1  | 0.126E+05      | (K)IQLAVE (K)Q/L/I/A/V/A/E/G/V/K/P(E)K          | 109.32  | 478.9337 | 1434.795 | -0.0086 | -6    | 6.14 | 24364.9  | 9.64 HUMAN  | HOY10   | Methionine-tRNA ligase, cytoplasmic (Fragment)               |
| 14512 | dirMS_041712_NAR_60mM_plus2.12165.12165  | 3 | 8.1  | 1.01E+06 M230m | (R)MISMR)(R)S/M/K/E/V/D/Q/L(Q)M/L/N/V(Q)N(K)N   | 120.57  | 647.3021 | 1923.897 | -0.005  | -0.2  | 4.68 | 40059.4  | 4.83 HUMAN  | ETXW1   | Tubulin beta chain                                           |
| 14513 | dirMS_041712_NAR_120mM_minus2.7708.7708  | 3 | 8.09 | 1.287E+04      | (K)YAVAG)(K)A/Y/A/G/D/A/E/E/R(Q)R               | 95.85   | 427.2156 | 1279.628 | -0.0045 | -3.5  | 4.68 | 27269.3  | 5.79 HUMAN  | O15200  | Spectrin beta chain, non-erythrocytic 2                      |
| 14514 | dirMS_041712_NAR_120mM_minus2.9866.9866  | 3 | 8.09 | 1.300E+05      | (K)YIPLAD (K)A/Y/P/L/A/D/A/H/L/T(K)             | 108.42  | 443.2499 | 1327.737 | -0.0017 | -0    | 5.85 | 14855.1  | 9.26 HUMAN  | IAI4D1  | NHP2 non-histone chromosome protein 2-like 1 (S. cerevisiae) |
| 14515 | dirMS_041712_NAR_20mM_minus2.14438.14438 | 2 | 8.09 | 0.219E+05      | (K)IDAVAG)(K)D/A/V/G/L/V/N/L/V(R)Q              | 198.2   | 599.3503 | 1197.695 | -0.0017 | -1.4  | 5.84 | 58502.6  | 6.09 HUMAN  | B4DQY3  | Heat shock 70 kDa protein 1-like                             |
| 14516 | dirMS_041712_NAR_20mM_minus2.1467.1467   | 2 | 8.09 | 0.962E+04      | (K)YVDDG)(K)Y/V/D/G/V/L/S/L/V(K)Q               | 201.65  | 713.9104 | 1462.815 | -0.0016 | -1.1  | 4.21 | 30947.9  | 6.47 HUMAN  | H3B334  | Pyruvate kinase                                              |
| 14517 | dirMS_041712_NAR_20mM_minus2.6168.6168   | 2 | 8.09 | 0.275E+05      | (K)TSVEM)(K)T/S/E/V/C/V(R)                      | 107.85  | 514.726  | 1028.447 | -0.0049 | -1.8  | 5.66 | 18946.7  | 9.13 HUMAN  | B4D1P7  | Nuclear acetyl-coA-binding protein                           |
| 14518 | dirMS_041712_NAR_50mM_minus2.10131.10131 | 3 | 8.09 | 1.102E+05      | (R)JALRETR)(R)A/L/R/L/E/T/P/A/Q/L/D/L/T(K)N     | 125.55  | 562.6354 | 1685.907 | -0.0152 | -9    | 4.68 | 26790    | 6.25 HUMAN  | FGS111  | Proteasome subunit alpha type-1                              |
| 14519 | dirMS_041712_NAR_50mM_minus2.8610.8610   | 3 | 8.09 | 0.113E+05      | (R)GIIAVY)(R)G/V/A/V/Y/E/T/P/T/A/H/N/G(A)K      | 117.02  | 564.6215 | 1691.839 | -0.0112 | 6.6   | 6.75 | 25016.4  | 5.65 HUMAN  | B3K8Z8  | Toil-interacting protein                                     |
| 14520 | dirMS_041712_NAR_50mM_minus2.10405.10405 | 3 | 8.09 | 1.109E+05      | (K)TCYFET)(K)T/C/V/F/E/K/E/D/P/S/V/M(R)S        | 117.63  | 571.2615 | 1711.778 | -0.0079 | -4.6  | 4.68 | 26780.7  | 5.95 HUMAN  | Q13085  | Acetyl-CoA carboxylase 1                                     |
| 14521 | dirMS_041712_NAR_50mM_minus2.1311.1311   | 3 | 8.09 | 1.302E+05      | (K)GKQD)(K)G/K/A/E/I/E/A/S/L/E/R(K)Q            | 128.32  | 564.8076 | 1618.511 | -0.004  | -0.4  | 6.14 | 28395.6  | 6.92 HUMAN  | C2E26   | Actin, alpha skeletal muscle                                 |
| 14522 | dirMS_041712_NAR_60mM_minus2.1275.1275   | 3 | 8.09 | 0.476E+05      | (K)HKKPT)(K)H/P/T/V/S/E/F/S(Q)Q                 | 131.07  | 486.264  | 1456.778 | -0.0014 | -1    | 6.75 | 52365.1  | 6.17 HUMAN  | B7R20   | T-complex protein 1 subunit delta                            |
| 14523 | dirMS_041712_NAR_60mM_minus2.12889.12889 | 3 | 8.09 | 0.255E+05      | (K)QAJDHS)(K)A/Q/H/D/V/L/L/G/G/S/T(R)I          | 131.63  | 489.2475 | 1465.812 | -0.0032 | -2.2  | 6.79 | 60126    | 5.44 HUMAN  | ETP94   | Heat shock 70 kDa protein 1A/1B                              |
| 14524 | dirMS_041712_NAR_60mM_minus2.14931.14931 | 3 | 8.09 | 1.372E+05      | (R)KIKGDR (R)K/I/G/D/P/L/L/E/D/T(R)M            | 146.22  | 547.2595 | 1389.769 | -0.0046 | -3.4  | 4.56 | 47309.6  | 5.42 HUMAN  | B4DQY7  | 4-irrmethionylinoobutyraldehyde dehydrogenase                |
| 14525 | dirMS_041712_NAR_60mM_minus2.1822.1822   | 3 | 8.09 | 0.589E+04      | (R)ILGAS)(R)I/L/G/A/S/E/T/A/S/L(E)R             | 162.8   | 564.2994 | 1498.951 | -0.0034 | 0.8   | 4.74 | 14229.5  | 6.25 HUMAN  | CR18B4  | Actin, alpha 1                                               |
| 14526 | dirMS_041712_NAR_60mM_minus2.6970.6970   | 3 | 8.09 | 1.130E+05      | (R)ILGAS)(R)I/L/G/A/G/S/A/D/E/R(E)K             | 97.1    | 450.2225 | 1348.652 | -0.0004 | -0.3  | 4.68 | 150022.8 | 9.1 HUMAN   | ETV520  | Uncoupler-associated myosin-VI                               |
| 14527 | dirMS_041712_NAR_60mM_minus2.9789.9789   | 3 | 8.09 | 0.917E+04      | (K)YAVTTE (K)Y/A/V/T/T/S/G/D/H/G(I)R            | 114.47  | 434.9021 | 1302.68  | -0.0117 | 9     | 6.74 | 139883.7 | 8.06 HUMAN  | P5E321  | Cotoper subunit alpha                                        |
| 14528 | dirMS_041712_NAR_120mM_plus2.5818.5818   | 4 | 8.09 | 0.267E+05      | (R)KJTKQ)(R)K/T/G/Q/A/P/G/S/Y/T/A/N/K(N)G       | 83.7    | 450.4826 | 1798.908 | -0.0003 | -0.2  | 9.83 | 11447.2  | 9.18 HUMAN  | CJF1R7  | Cytocytome C (Fragment)                                      |
| 14529 | dirMS_041712_NAR_30mM_plus2.17877.17877  | 2 | 8.09 | 0.228E+05      | (R)KLNWQ)(R)I/L/N/W/Q/Q/L/V/E(Q)K               | 106.68  | 673.8645 | 1345.736 | -0.0145 | -10.8 | 4.55 | 26720.7  | 5.95 HUMAN  | Q13085  | Acetyl-CoA carboxylase 1                                     |
| 14530 | dirMS_041712_NAR_40mM_plus2.7988.7988    | 2 | 8.09 | 0.157E+04      | (K)GKCP)(K)G/K/P/S/Q/R                          | 107.58  | 538.7602 | 1078.51  | -0.0023 | -3    | 9.75 | 27364.5  | 5.09 HUMAN  | Q000P9  | Chloride intracellular channel protein 1                     |
| 14531 | dirMS_041712_NAR_50mM_plus2.10074.10074  | 3 | 8.09 | 1.594E+04      | (K)JITNED)(K)T/I/T/K/D/P/S/L/P/E/P(K)C          | 120.53  | 484.6079 | 1451.81  | -0.0013 | -0.9  | 6.07 | 20033.8  | 9.79 HUMAN  | B4D616  | Asparagine-tRNA ligase, cytoplasmic                          |
| 14532 | dirMS_041712_NAR_50mM_plus2.12155.12155  | 3 | 8.09 | 1.120E+06      | (K)JASENS)(K)A/S/E/S/L/R/E/V(L)K                | 132.27  | 491.9313 | 1473.766 | -0.0138 | 9.3   | 4.79 | 43773.3  | 5.26 HUMAN  | F8V219  | Keratin, type I cytoskeletal 18                              |
| 14533 | dirMS_041712_NAR_50mM_plus2.21664.21664  | 3 | 8.09 | 0.101E+05      | (K)HPLPAL)(K)T/H/L/P/L/A/L/Q/L/L/D/L/Q(K)K      | 183.97  | 601.0191 | 1801.058 | -0.0154 | -8.6  | 6.41 | 22423.5  | 7.91 HUMAN  | EP9R8   | Sulfotransferase 1A2 (Fragment)                              |
| 14534 | dirMS_041712_NAR_50mM_plus2.2276.2276    | 3 | 8.09 | 0.805E+05      | (K)JYVDDG)(K)Y/V/D/G/V/L/S/L/V(K)Q              | 117.33  | 407.3406 | 1121.474 | -0.004  | -3.9  | 4.47 | 35566.4  | 9.3 HUMAN   | Q2283   | Transaldolase                                                |
| 14535 | dirMS_041712_NAR_50mM_plus2.9517.9517    | 3 | 8.05 | 0.245E+05      | (R)NIVQ)(R)N/I/V/Q/N/G/P/G/N/Q/T/V/D/A/W(N)K(V) | 117.08  | 643.0046 | 1927.003 | -0.004  | -2.1  | 8.59 | 31765.1  | 6.13 HUMAN  | F8V737  | Proliferation-associated protein 2G4                         |
| 14536 | dirMS_041712_NAR_120mM_minus2.6081.6081  | 3 | 8.06 | 1.564E+05      | (K)TCESSE)(K)T/C/E/S/S/F/C/R(Q)                 | 86.8    | 435.1849 | 1303.541 | -0.0004 | -0.3  | 5.81 | 10576.1  | 11.44 HUMAN | EP9R8   | Neutral alpha-glucosidase AB                                 |
| 14537 | dirMS_041712_NAR_120mM_minus2.9801.9801  | 4 | 8.08 | 2.839E+04      | (K)LTDCV)(K)T/D/C/V/M/R/D/P/A/S/K(R)S           | 107.88  | 412.714  | 1647.831 | -0.0036 | 2.2   | 8.75 | 37486.1  | 9.03 HUMAN  | P22626  | Heterogeneous nuclear ribonucleoproteins A2/B1               |
| 14538 | dirMS_041712_NAR_50mM_minus2.12669.12669 | 2 | 8.08 | 0.598E+04      | (K)ILGELLE)(K)I/L/G/L/E/L/D/D/A/L(K)K           | 173.23  | 407.3406 | 1121.474 | -0.004  | -3.9  | 4.47 | 35566.4  | 9.3 HUMAN   | Q2283   | Transaldolase                                                |
| 14539 | dirMS_041712_NAR_20mM_minus2.1252.1252   | 2 | 8.08 | 0.822E+04      | (K)SLVPT)(K)S/L/V/P/V/T/S/A/P(R)Q               | 183.38  | 594.3411 | 1187.678 | -0.0034 | -2.8  | 9.47 | 92752.5  | 4.76 HUMAN  | P14625  | Endoplasmic                                                  |
| 14540 | dirMS_041712_NAR_20mM_minus2.14669.14669 | 2 | 8.08 | 0.962E+04      | (K)YVDDG)(K)Y/V/D/G/V/L/S/L/V(K)Q               | 201.65  | 713.9104 | 1462.815 | -0.0016 | -1.1  | 4.21 | 30947.9  | 6.47 HUMAN  | H3B334  | Pyruvate kinase                                              |
| 14541 | dirMS_041712_NAR_20mM_minus2.14717.14717 | 2 | 8.08 | 0.838E+04      | (R)JITJTG)(R)I/T/J/T/G/P/T/A/I(K)A              | 120.33  | 694.9107 | 1388.815 | -0.0007 | -0.5  | 8.75 | 38010.7  | 6.67 HUMAN  | Q13165  | Poly(C)-binding protein                                      |
| 14542 | dirMS_041712_NAR_20mM_minus2.10061.10061 | 2 | 8.08 | 0.947E+04      | (R)NIVSSS)(R)N/V/S/S/S/S/F(K)K                  | 108.82  | 484.7528 | 986.505  | -0.0067 | -6.6  | 8.75 | 53941.6  | 6.13 HUMAN  | CJF1E4  | COP9 signalosome complex subunit 1                           |
| 14543 | dirMS_041712_NAR_20mM_minus2.18090.1811  | 2 | 8.08 | 0.895E+04      | (K)YVDDG)(K)Y/V/D/G/V/L/S/L/V(K)Q               | 201.65  | 713.9104 | 1462.815 | -0.0016 | -1.1  | 4.21 | 30947.9  | 6.47 HUMAN  | H3B334  | Pyruvate kinase                                              |
| 14544 | dirMS_041712_NAR_50mM_minus2.16344.16344 | 3 | 8.08 | 0.175E+05 M1m  | (-)(M)KPLV)(-)(K)P/L/V/V/V/G/V/G/G/V(A)K        | 161.27  | 529.3077 | 1569.919 | -0.0019 | -3.1  | 10   | 24450.2  | 5.44 HUMAN  | P30085  | UMP-CMP kinase                                               |
| 14545 | dirMS_041712_NAR_60mM_minus2.5330.5330   | 3 | 8.08 | 1.573E+04      | (K)JECDDK)(K)E/D/D/K/G/D/S/C/D/R(Y)             | 82.25   | 542.5547 | 1625.653 | -0.0035 | -2.1  | 4.04 | 28472.4  | 5.71 HUMAN  | P21333  | Filamin-A                                                    |
| 14546 | dirMS_041712_NAR_60mM_minus2.6091.6091   | 3 |      |                |                                                 |         |          |          |         |       |      |          |             |         |                                                              |



|       |                                            |   |      |                 |                                                      |        |          |          |          |      |         |            |             |                          |                                                                                  |
|-------|--------------------------------------------|---|------|-----------------|------------------------------------------------------|--------|----------|----------|----------|------|---------|------------|-------------|--------------------------|----------------------------------------------------------------------------------|
| 14711 | dirMS_041712_NAR_40mM_plus2.16239.16239.2  | 2 | 8.01 | 0.150E+05       | (R)YLTVAA(R)Y LIT V/A/V F R(G)                       | 16203  | 520.2997 | 1039.593 | -0.0014  | -1.3 | 8.75    | 40069.4    | 4.83 HUMAN  | FEW1R1                   | Tubulin beta chain                                                               |
| 14712 | dirMS_041712_NAR_40mM_plus2.18701.18703.3  | 2 | 8.01 | 0.698E+04       | (R)IGTTH(R)IG G T P /A/A/F/S L/P H E Q R(K)          | 17537  | 593.6623 | 1778.598 | -0.0077  | -4.3 | 6.75    | 6068.8     | 5.09 HUMAN  | IL34E8                   | Pre-IRNA-processing protein TSR1 homolog (Fragment)                              |
| 14713 | dirMS_041712_NAR_40mM_plus2.6298.6298.2    | 2 | 8.01 | 7.65E+04        | (R)YTDAA(R)YTD/A/A/V A R(R)                          | 9017   | 755.21   | 960.511  | -0.0077  | -1.7 | 5.21    | 41827.9    | 6.03 HUMAN  | PH8007                   | 60 kDa heat shock protein, mitochondrial                                         |
| 14714 | dirMS_041712_NAR_40mM_plus2.6961.6961.2    | 2 | 8.01 | 0.726E+04       | (R)ITGCTG(R)IL/T/E/G C/S F R(R)                      | 101    | 485.217  | 969.446  | -0.0076  | -1.0 | 6       | 5988.9     | 5.05 HUMAN  | CN1C5                    | 40S ribosomal protein S27                                                        |
| 14715 | dirMS_041712_NAR_40mM_plus2.7161.7162.2    | 2 | 8.01 | 1.67E+05        | (R)IKNPYTR(K)K P N V(D) L(L)                         | 102.13 | 432.2161 | 863.426  | -0.0008  | -1   | 8.85    | 86346.5    | 5.05 HUMAN  | FEW3A4                   | 26S proteasome non-ATPase regulatory subunit 2                                   |
| 14716 | dirMS_041712_NAR_50mM_plus2.12430.12430.3  | 2 | 8.01 | 1.269E+05       | (R)KKVQVQ(K)K V P V S T P/T L/V/E V S R(N)           | 133.32 | 547.3169 | 1639.938 | -0.0016  | -1   | 8.75    | 57751.3    | 6.9 HUMAN   | FEWNR0                   | Serum albumin                                                                    |
| 14717 | dirMS_041712_NAR_50mM_plus2.13404.13404.3  | 2 | 8.01 | 0.136E+05       | (R)KGGVY(K)K V G Q V V P V D A F G T A N R(K)        | 138.82 | 545.6039 | 1634.792 | 0.002    | 1.2  | 5.21    | 41827.9    | 7 HUMAN     | FEW7A9                   | Phosphoglycerate kinase                                                          |
| 14718 | dirMS_041712_NAR_50mM_plus2.13678.13678.3  | 2 | 8.01 | 0.872E+05       | (R)KAASDA(R)K A S D/A/M/T E/L/P P T H I R(K)         | 140    | 607.3177 | 1819.937 | 0.0015   | 0.8  | 5.32    | 12626.1    | 4.4 HUMAN   | FEW2M0                   | 14-3-3 protein epsilon (Fragment)                                                |
| 14719 | dirMS_041712_NAR_50mM_plus2.20225.20225.3  | 2 | 8.01 | 1.11E+05        | (R)KALESPEF(K)A L I E/S P/E R P F A L I L G G A V(K) | 174.73 | 590.3344 | 1768.996 | -0.0069  | -3.9 | 6.19    | 41827.5    | 7 HUMAN     | BZ77A9                   | Phosphoglycerate kinase                                                          |
| 14720 | dirMS_041712_NAR_60mM_plus.16174.16174.3   | 2 | 8.01 | 0.579E+05       | (R)HTSAL(R)R T H S A L G/P A/L/G A/F R(L)            | 141.82 | 514.2744 | 1540.812 | -0.0032  | -2.1 | 6.85    | 141616.6   | 6.1 HUMAN   | BZ7KM0                   | Protein transport protein Sec2B                                                  |
| 14721 | dirMS_041712_NAR_120mM_minus.11606.11606.3 | 2 | 8    | 1.138E+05       | (R)KTLGVEY(K)K L V G E/V/T/M D V S Y K R(K)          | 117.33 | 512.9957 | 1535.773 | -0.0008  | -0.5 | 4.68    | 586007.1   | 5.44 HUMAN  | PH8007                   | Epiplakin                                                                        |
| 14722 | dirMS_041712_NAR_30mM_minus2.10712.1075.2  | 0 | 8    | 1.27E+05        | (R)KLDSPF(K)K D I S P F V A G L V A R(K)             | 112.53 | 424.2191 | 951.427  | -0.0032  | 6.1  | 4.21    | 30466.2    | 4.7 HUMAN   | FEW1B6                   | Dnal homolog subfamily c member 7 (Fragment)                                     |
| 14723 | dirMS_041712_NAR_50mM_minus2.13685.13685.3 | 2 | 8    | 0.219E+04       | (R)IDLSHG(R)R L S H I G D A V I/V/S C A K(D)         | 145.88 | 528.9397 | 1584.805 | -0.0005  | -0.3 | 5.21    | 29110.6    | 4.57 HUMAN  | PI2004                   | Proliferating cell nuclear antigen                                               |
| 14724 | dirMS_041712_NAR_120mM_plus.18034.18034.3  | 2 | 8    | 1.386E+05       | (R)KYRGGTFP(K)Y R G F T V/P E/A F R(G)               | 148.18 | 452.9069 | 1356.706 | 0.0003   | 0.2  | 8.75    | 27264.5    | 5.09 HUMAN  | DD0029                   | Chloride intracellular channel protein 1                                         |
| 14725 | dirMS_041712_NAR_20mM_plus.11258.11258.2   | 2 | 8    | 0.133E+05       | (R)YALDVA(R)Y A L I V/D/A T V/E T R(K)               | 150.25 | 669.3157 | 1337.626 | -0.0019  | -1.4 | 4.37    | 22956      | 8.8 HUMAN   | EPK2C5                   | Cofilin-1                                                                        |
| 14726 | dirMS_041712_NAR_20mM_plus.11274.11274.2   | 2 | 8    | 0.733E+04       | (R)RSALVE(R)A S L/E V/V/N/S L R(G)                   | 150.9  | 679.8642 | 1592.727 | -0.0023  | -1.7 | 4.53    | 22489.6    | 5.38 HUMAN  | EP9139                   | Elongation factor 1-beta (Fragment)                                              |
| 14727 | dirMS_041712_NAR_20mM_plus.12949.12949.2   | 2 | 8    | 0.325E+05 M316m | (R)ISEQFTR(R)S I/Q/E/F A m R(K)                      | 161.5  | 623.3012 | 1229.598 | 1.5      | 6    | 42831.5 | 4.86 HUMAN | AKK854      | HCG19350A, isoform CRA_f |                                                                                  |
| 14728 | dirMS_041712_NAR_20mM_plus.8067.8067.2     | 2 | 8    | 0.421E+05 M239m | (R)KEVDEQ(K)E V/D/E/Q m L/V/N Q/N(K)                 | 125.1  | 731.8435 | 1446.689 | 15.9904  | -3.1 | 4.14    | 40069.4    | 4.83 HUMAN  | FEW1R1                   | Tubulin beta chain                                                               |
| 14729 | dirMS_041712_NAR_20mM_plus2.6154.6154.2    | 2 | 8    | 0.122E+04       | (R)FSSSSO(R)F S I S S G/Y G G S S Y R(K)             | 86.68  | 618.2674 | 1235.529 | -0.0012  | -1   | 8.75    | 62291.5    | 5.13 HUMAN  | P35527                   | Keratin, type I cytoskeletal 9                                                   |
| 14730 | dirMS_041712_NAR_30mM_plus2.6798.6798.2    | 2 | 8    | 0.136E+06       | (R)KDLSSV(R)R L S I G S V G I S F R(H)               | 104.9  | 538.2855 | 1075.574 | -0.0105  | -9.8 | 6       | 20576.9    | 9.94 HUMAN  | FEW6E4                   | Heat shock protein beta-1                                                        |
| 14731 | dirMS_041712_NAR_60mM_plus.15059.15059.3   | 2 | 8    | 1.299E+04       | (R)ELAQFS(R)R A L V/A/G I/S K/E/K F E(R)             | 135.27 | 504.9258 | 1512.769 | -0.0064  | -4.3 | 4.79    | 30944.2    | 6.52 HUMAN  | BI02M1                   | ATP-dependent RNA helicase DDX39A                                                |
| 14732 | dirMS_041712_NAR_60mM_plus.9793.9792.3     | 2 | 8    | 0.215E+05       | (R)RGGGLV(R)R P I G L V K Q/E D/P(R)                 | 109.68 | 415.8936 | 1245.659 | 0.0076   | 6.1  | 6.07    | 180453.7   | 6.04 HUMAN  | HDY0Q2                   | YLP motif-containing protein 1 (Fragment)                                        |
| 14733 | dirMS_041712_NAR_30mM_minus2.16454.16454.2 | 2 | 7.99 | 0.133E+05       | (R)KSTFNU(K)T F I F/V A L I K(K)                     | 142.97 | 517.1272 | 921.54   | -0.0053  | -5.7 | 8.47    | 23322.7    | 5.07 HUMAN  | DR6CP9                   | Deoxycytidine kinase                                                             |
| 14734 | dirMS_041712_NAR_30mM_minus2.17574.17574.2 | 2 | 7.99 | 0.166E+05       | (R)KGLUDQ(K)K F I G L D V G Y P R(K)                 | 150.23 | 519.2752 | 1037.542 | 0.0017   | -1.6 | 5.83    | 15567.5    | 6.13 HUMAN  | HDY416                   | Adenylate kinase isoenzyme 1 (Fragment)                                          |
| 14735 | dirMS_041712_NAR_30mM_plus2.19493.19493.2  | 2 | 7.99 | 0.354E+05       | (R)RWSN(R)R A S S U/S/L/M G A M/E(K)                 | 105.25 | 632.3234 | 1263.64  | -0.0003  | 0.5  | 6.05    | 26161      | 5.68 HUMAN  | EP9P04                   | Epiplakin                                                                        |
| 14736 | dirMS_041712_NAR_40mM_minus2.6974.6974.2   | 2 | 7.99 | 0.585E+05       | (R)KSTFTT(R)R I G S V/F/T/T A E R(E)                 | 111.55 | 566.7661 | 1132.527 | -0.002   | -1.8 | 6       | 23901.9    | 5.28 HUMAN  | IL3L19                   | Actin, cytoplasmic 2, N-terminally processed (Fragment)                          |
| 14737 | dirMS_041712_NAR_50mM_minus2.15485.15485.3 | 2 | 7.99 | 0.475E+05       | (R)IDGLAF(R)R D G A/L A F N A/L H R(H)               | 155.62 | 409.5594 | 1226.664 | -0.0004  | -0.3 | 6.74    | 146974     | 5.55 HUMAN  | CJ9R8P                   | Spectrin beta chain, non-erythrocytic 4                                          |
| 14738 | dirMS_041712_NAR_50mM_plus2.9715.9715.3    | 2 | 7.99 | 0.708E+04       | (R)ELTEKE(R)R L T L/E K/V/E L K(L)                   | 123.67 | 409.5719 | 1199.688 | -0.0007  | 0.6  | 4.79    | 27269.9    | 5.79 HUMAN  | DI0520                   | Spectrin beta chain, non-erythrocytic 2                                          |
| 14739 | dirMS_041712_NAR_50mM_plus2.13340.13340.3  | 2 | 7.99 | 0.101E+05       | (R)KTFNEM(K)T F N E M P V L Q L K R(R)               | 101.35 | 334.959  | 1461.161 | -0.0047  | 6.2  | 5.83    | 1347.6     | 5.71 HUMAN  | PH8007                   | Heterogeneous nuclear ribonucleoprotein H                                        |
| 14740 | dirMS_041712_NAR_60mM_minus2.8062.8062.3   | 2 | 7.99 | 2.069E+05       | (R)KLNTEY(K)N L V T E G E/K/D K(L)                   | 105.47 | 439.517  | 1316.706 | -0.0102  | -7.7 | 4.68    | 21077      | 9.05 HUMAN  | FEW9E0                   | Alpha-enolase (Fragment)                                                         |
| 14741 | dirMS_041712_NAR_120mM_plus.9892.9892.3    | 2 | 7.99 | 1.173E+06       | (R)KSFQND(K)K F V D L M V/G C R(K)                   | 104.62 | 420.5351 | 1259.584 | 0.007    | 5.6  | 8.31    | 45228.3    | 6.03 HUMAN  | F5H237                   | Adenosylthyminease                                                               |
| 14742 | dirMS_041712_NAR_20mM_plus.10879.10935.2   | 2 | 7.99 | 0.231E+04       | (R)KEVPAW(K)E V P A/P V P E T L K(K)                 | 147.52 | 541.8074 | 1080.609 | -0.0017  | -1.6 | 4.53    | 29282.3    | 10.71 HUMAN | PH1824                   | 60S ribosomal protein L7                                                         |
| 14743 | dirMS_041712_NAR_20mM_plus2.11608.11608.2  | 2 | 7.99 | 0.515E+05       | (R)SGSDEY(K)K S G S D E Y G L V L R(K)               | 107.07 | 561.2662 | 1124.526 | -0.0004  | -0.4 | 4.53    | 30320.3    | 6.31 HUMAN  | PH1824                   | Transcription intermediate factor 1-beta                                         |
| 14744 | dirMS_041712_NAR_30mM_plus2.13216.13236.2  | 2 | 7.99 | 0.570E+05       | (R)KDFTFG(K)D F T F G V S I Y R(K)                   | 122.88 | 575.7876 | 1150.567 | 0.0006   | 0.5  | 9.75    | 18601.6    | 10.52 HUMAN | PH2280                   | 40S ribosomal protein S11                                                        |
| 14745 | dirMS_041712_NAR_30mM_plus2.16056.16056.2  | 2 | 7.99 | 0.289E+05       | (R)WJSGDF(R)G V/G S F D N I P I(K)                   | 136.95 | 598.8053 | 1178.605 | -0.0019  | -1.6 | 4.21    | 20631.5    | 6.98 HUMAN  | DR6AX2                   | C-terminal-binding protein 1 (Fragment)                                          |
| 14746 | dirMS_041712_NAR_30mM_plus2.16268.16268.2  | 2 | 7.99 | 0.177E+05       | (R)IVDEYTR(E)R V E T F E/D I(K)                      | 137.82 | 604.8021 | 1208.604 | -0.0076  | -6.3 | 4       | 30992.3    | 6.14 HUMAN  | BZRE18                   | Protein SET                                                                      |
| 14747 | dirMS_041712_NAR_30mM_plus2.17195.17195.3  | 2 | 7.99 | 1.107E+06       | (R)KDMGV(K)K D N I G V I G V L/E P M K K(K)          | 158.58 | 506.9448 | 1527.82  | -0.0001  | -0.1 | 6.07    | 29854.8    | 9.49 HUMAN  | CJ3R00                   | Regulator of chromosome condensation (Fragment)                                  |
| 14748 | dirMS_041712_NAR_50mM_plus2.21501.21501.3  | 2 | 7.99 | 1.847E+04       | (R)KTFNEM(K)T F N E M P V L Q L K R(R)               | 101.35 | 334.959  | 1461.161 | -0.0047  | 6.2  | 5.83    | 1347.6     | 5.71 HUMAN  | PH8007                   | Mtiso-3                                                                          |
| 14749 | dirMS_041712_NAR_60mM_plus.5644.5644.3     | 2 | 7.99 | 1.386E+04       | (R)ITLKEE(R)R L E/E/E/E/E A R(L)                     | 87.77  | 454.555  | 1361.654 | -0.0039  | -2.8 | 4.32    | 95923.1    | 9.67 HUMAN  | QB9U08                   | Probable ATP-dependent RNA helicase DDX23                                        |
| 14750 | dirMS_041712_NAR_20mM_minus.10989.10989.2  | 2 | 7.98 | 0.996E+04       | (R)KIQTVQ(K)K G T A/Q/V I T Q G T S L K(R)           | 157.17 | 673.7389 | 1345.769 | -0.018   | -1.8 | 8.75    | 57391.2    | 6.29 HUMAN  | DA3175                   | D-3-phosphoglycerate dehydrogenase                                               |
| 14751 | dirMS_041712_NAR_20mM_minus2.4659.14659.2  | 2 | 7.98 | 0.883E+04       | (R)ITLGTQ(R)R I T L/T L/G T I N A I F K(A)           | 201.33 | 694.9107 | 1388.415 | -0.0007  | -0.5 | 8.75    | 38010.7    | 6.67 HUMAN  | DI0565                   | Poly(I:C)-binding protein 1                                                      |
| 14752 | dirMS_041712_NAR_20mM_minus2.1181.1181.2   | 2 | 7.98 | 0.98E+05        | (R)KIDRLE(K)K I D R S L E Q V T T A S I G(K)         | 144.62 | 604.3145 | 1810.918 | 0.0108   | 6    | 4.68    | 54214.9    | 5.66 HUMAN  | CJ9B13                   | Acetyl-CoA synthetase (Fragment)                                                 |
| 14753 | dirMS_041712_NAR_30mM_plus2.15468.15468.2  | 2 | 7.98 | 0.182E+05       | (R)KLEIYF(R)K L E I Y F D R I(R)                     | 137.48 | 478.2479 | 955.488  | 0.0002   | 0.2  | 4.37    | 59952.2    | 6.14 HUMAN  | PH1439                   | NOL1/NOP259 domain family, member 2, isoform CRA_b                               |
| 14754 | dirMS_041712_NAR_50mM_minus2.12603.12603.3 | 2 | 7.98 | 0.109E+06 M14m  | (R)JAGKAP(R)G K A P V I C A T Q/M L E/S I M(K)       | 139.87 | 636.9197 | 1876.969 | 31.9912  | 0.7  | 6.84    | 18466.1    | 5.78 HUMAN  | H3BSU3                   | Pyruvate kinase (Fragment)                                                       |
| 14755 | dirMS_041712_NAR_50mM_plus2.13458.13458.3  | 2 | 7.98 | 1.137E+05       | (R)KIDSRLE(K)K I D R S L E Q V T T A S I G(K)        | 144.62 | 604.3145 | 1810.918 | 0.0108   | 6    | 4.68    | 54214.9    | 5.66 HUMAN  | CJ9B13                   | Acetyl-CoA synthetase (Fragment)                                                 |
| 14756 | dirMS_041712_NAR_50mM_plus2.15750.15750.3  | 2 | 7.98 | 0.916E+04       | (R)KIDSRLE(K)K I D R S L E Q V T T A S I G(K)        | 158.72 | 618.328  | 1852.965 | -0.0016  | -0.9 | 4.4     | 94368.2    | 6.02 HUMAN  | QJ9HD2                   | Serine/threonine-protein kinase TBK1                                             |
| 14757 | dirMS_041712_NAR_50mM_plus2.7094.7094.3    | 2 | 7.98 | 1.697E+04 M189m | (R)JALAEF(R)R A L E/E A m E Q K A E L R(K)           | 107.35 | 554.9379 | 1646.805 | 15.9937  | 0.7  | 4.33    | 237783.5   | 5.5 HUMAN   | PH5979                   | Myosin-9                                                                         |
| 14758 | dirMS_041712_NAR_50mM_plus2.8835.8835.3    | 2 | 7.98 | 1.722E+04       | (R)RJSATVY(R)R S A T V K D V A T V D V A A E R(L)    | 118.25 | 506.6094 | 1517.817 | -0.0033  | -2.2 | 5.79    | 57391.2    | 6.29 HUMAN  | DA3175                   | D-3-phosphoglycerate dehydrogenase                                               |
| 14759 | dirMS_041712_NAR_60mM_minus.13179.13179.3  | 2 | 7.98 | 2.40E+04 M190m  | (R)KIKVWY(K)K V N W/P F E I N K(K)                   | 135.68 | 615.6165 | 1341.753 | 203.0824 | 2    | 8.59    | 228081     | 6.98 HUMAN  | 6A6N9H                   | Structural maintenance of chromosomes flexible hinge domain-containing protein 1 |
| 14760 | dirMS_041712_NAR_60mM_plus2.6587.6587.3    | 2 | 7.98 | 1.106E+05 N100m | (R)NIGDAR(K)K N I G D A R P N K V S A P I R(K)       | 95.15  | 449.2329 | 1329.694 | 15.9898  | -3.8 | 8.5     | 5722.8     | 6.78 HUMAN  | QY9100                   | HNA-splicing ligase Rtt10 homolog                                                |
| 14761 | dirMS_041712_NAR_60mM_plus2.9915.9915.3    | 2 | 7.98 | 1.12E+05        | (R)KAGTQY(K)K A G T Q Y V D V V D A T R I(K)         | 125.65 | 539.6117 | 1619.623 | -0.0007  | -0.7 | 4.56    | 52191.2    | 6.31 HUMAN  | DA3175                   | D-3-phosphoglycerate dehydrogenase                                               |
| 14762 | dirMS_041712_NAR_120mM_plus.13105.13105.3  | 2 | 7.98 | 1.297E+06       | (R)KIVKLEA(K)K V K L E A E I/V/T Y R(R)              | 121.7  | 431.5774 | 1292.721 | -0.0032  | -2.5 | 6.11    | 43737.3    | 4.26 HUMAN  | FBV2Y9                   | Keratin, type I cytoskeletal 18                                                  |
| 14763 | dirMS_041712_NAR_120mM_plus.24546.24546.3  | 2 | 7.98 | 0.162E+05       | (R)KIDATY(K)K H Y T E G A E I/V/D S/V L V V R(K)     | 184.27 | 653.6605 | 1958.982 | -0.0148  | -7.6 | 4.31    | 42831.     |             |                          |                                                                                  |

|       |                                           |   |      |                   |                                                          |        |          |          |          |       |      |         |       |       |          |                                                              |
|-------|-------------------------------------------|---|------|-------------------|----------------------------------------------------------|--------|----------|----------|----------|-------|------|---------|-------|-------|----------|--------------------------------------------------------------|
| 14820 | dirMS_041712_NAR_50mM_plus.6823.6823.3    | 3 | 7.96 | 1.130E+05         | (K)EETOPP(K)E V/Q/P/P F/A/L A/G E                        | 100.88 | 413.9019 | 1239.694 | -0.0032  | -2.6  | 6.24 | 45021.6 | 8.74  | HUMAN | QBNC51   | Plasminogen activator inhibitor 1 RNA-binding protein        |
| 14821 | dirMS_041712_NAR_50mM_plus.9312.9312.3    | 3 | 7.96 | 1.190E+05         | (R)EVLKDR(R)E V L E Q V V V L D Q T E A R D              | 116.27 | 576.3137 | 1726.933 | -0.0008  | -4    | 4.79 | 29500.8 | 5.72  | HUMAN | ZR870    | Proteasome subunit beta type-4                               |
| 14822 | dirMS_041712_NAR_50mM_plus.12299.12299.3  | 3 | 7.96 | 1.936E+05         | (L)IISLFDK(R)S L T F/T/T/H/L/V/P/R                       | 121.15 | 678.2113 | 2228.527 | -0.0013  | 3.3   | 5.3  | 33586.9 | 7.96  | HUMAN | Q203     | Translucalase                                                |
| 14823 | dirMS_041712_NAR_60mM_plus.15976.15976.3  | 3 | 7.96 | 1.252E+05         | (R)ITSLDK(R)I T S F/D/O D A F Q T E                      | 130.29 | 450.5399 | 1199.605 | -0.0004  | -0.3  | 5.62 | 21195.7 | 6.97  | HUMAN | HY021    | Cytosolic dynein 1 heavy chain $\gamma$ (Fragment)           |
| 14824 | dirMS_041712_NAR_60mM_plus.17135.17135.3  | 3 | 7.96 | 0.900E+05         | (R)IQIFPK(R)I F H P E Q/L/I/T G K E I                    | 146.82 | 470.9225 | 1410.774 | -0.0021  | -14.9 | 6.75 | 27836   | 8.0   | HUMAN | QH853    | Putative tubulin-like protein alpha-4B                       |
| 14825 | dirMS_041712_NAR_60mM_plus.19044.19044.3  | 3 | 7.96 | 0.138E+05         | (R)INSVST(R)N S I/V/N P/H/L S L E R(G)                   | 161.23 | 468.2401 | 1402.707 | -0.0016  | -11.1 | 6.75 | 26780.7 | 5.95  | HUMAN | Q13085   | Acetyl-CoA carboxylase 1                                     |
| 14826 | dirMS_041712_NAR_60mM_plus.5554.5554.3    | 3 | 7.96 | 0.312E+05 566     | (L)MDFPK(R)M F/D/V/F N/P/V/G P/N/A I                     | 171.63 | 478.2113 | 2228.527 | -0.0013  | 3.3   | 5.3  | 33586.9 | 7.96  | HUMAN | Q203     | Translucalase                                                |
| 14827 | dirMS_041712_NAR_60mM_plus.7441.7441.3    | 3 | 7.96 | 0.501E+05         | (R)ISSSHS(R)S S C H S S S E L L S D A V E A K I          | 96.05  | 539.584  | 1616.74  | -0.0024  | -1.5  | 4.65 | 22779.5 | 12.08 | HUMAN | IL3L6    | Serine/arginine repetitive matrix protein 2                  |
| 14828 | dirMS_041712_NAR_120mM_minus.6232.6232.3  | 3 | 7.95 | 1.088E+05         | (K)ISQDRD(K)I S/Q/R/E N G/E L R D                        | 88.63  | 439.5579 | 1316.655 | 0.0038   | 2.9   | 4.68 | 59955.3 | 4.28  | HUMAN | IS1355   | Protein phosphatase 1G                                       |
| 14829 | dirMS_041712_NAR_40mM_minus.12028.12028.3 | 3 | 7.95 | 0.148E+05         | (K)IAAFPA(K)A A P E A S S P P A S P L Q H L P G K A      | 154.52 | 656.6876 | 1968.055 | -0.0067  | -3.4  | 6.79 | 84649.8 | 5.82  | HUMAN | Q9E1A1   | Niban-like protein                                           |
| 14830 | dirMS_041712_NAR_50mM_plus.12890.12890.3  | 3 | 7.95 | 1.238E+05         | (R)IQATDR(K)R A T K O A T V A G L N V I R K I            | 150.87 | 543.3895 | 1627.913 | -0.0016  | -1.1  | 8.75 | 17973   | 5.16  | HUMAN | EPH05    | Hot shock cognate 71 kDa protein (Fragment)                  |
| 14831 | dirMS_041712_NAR_50mM_plus.8399.8399.3    | 3 | 7.95 | 1.194E+05         | (R)IGLAAE(K)S L A V A D I E F G I A R K I                | 115    | 607.9312 | 1848.802 | -0.0046  | -3.1  | 6.07 | 30174.4 | 7.15  | HUMAN | Q92763   | Fructose-bisphosphate aldolase A (Fragment)                  |
| 14832 | dirMS_041712_NAR_60mM_minus.14038.14038.3 | 3 | 7.95 | 0.245E+05         | (R)IVLVYH(R)I V/L/V/H/V G F E G L I A K I                | 138.57 | 641.9241 | 1383.763 | -0.0053  | -3.9  | 5.32 | 18719.9 | 6.91  | HUMAN | F8V00    | 6-phosphofruktokinase, muscle type (Fragment)                |
| 14833 | dirMS_041712_NAR_60mM_minus.15401.15401.3 | 3 | 7.95 | 1.311E+04         | (R)IVEKPP(R)Y E K V P G H I I/D/S C V/L R I              | 144.78 | 595.6552 | 1784.958 | -0.0064  | -3.6  | 4.68 | 56186.7 | 5.47  | HUMAN | BD4UR    | T-complex protein 1 subunit gamma                            |
| 14834 | dirMS_041712_NAR_60mM_minus.18132.18132.3 | 3 | 7.95 | 1.548E+05         | (K)IKTLPF(K)K T L F/P/L/D A L K K I                      | 162.7  | 424.9345 | 1272.793 | -0.0036  | -2.9  | 8.59 | 83732.6 | 5.55  | HUMAN | P13010   | X-ray repair cross-complementing protein 5                   |
| 14835 | dirMS_041712_NAR_50mM_plus.4650.4650.3    | 3 | 7.95 | 1.672E+05         | (R)IAAEED(R)R A A L T S/D V A Q D/P R K I                | 72.55  | 453.4272 | 1359.602 | -0.0008  | -0.6  | 4.08 | 11529.7 | 4.14  | HUMAN | PT0862   | Parathyroidin                                                |
| 14836 | dirMS_041712_NAR_120mM_plus.10450.10450.3 | 3 | 7.95 | 1.243E+05         | (R)ILRLAE(R)R R L A E D V D A/Q/Q R I A                  | 107.07 | 523.949  | 1569.834 | -0.0019  | -1.2  | 4.68 | 53778   | 5.74  | HUMAN | Q15149   | Plectin                                                      |
| 14837 | dirMS_041712_NAR_120mM_plus.10755.10755.3 | 3 | 7.95 | 1.212E+06         | (R)RELEK(R)E K L E M E M E A T G E K I                   | 109.52 | 446.2171 | 1336.623 | 0.0132   | 9.9   | 4.49 | 29678.2 | 9.57  | HUMAN | C9V58    | Non-POU domain-containing octamer-binding protein (Fragment) |
| 14838 | dirMS_041712_NAR_120mM_plus.20288.20288.4 | 4 | 7.95 | 1.355E+07         | (K)AAADW(K)A A D/W/P/D G K E F H G N I I K V I           | 159.08 | 491.0207 | 1960.992 | -0.0022  | -4.3  | 5.38 | 49181   | 4.93  | HUMAN | K7E7E    | TATA-binding protein-associated factor 2N                    |
| 14839 | dirMS_041712_NAR_120mM_plus.8027.8027.2   | 2 | 7.95 | 0.466E+05         | (K)STTDFK(R)S T F/T/T/H/L/V/P/R                          | 95.25  | 566.8014 | 1120.6   | -0.0042  | -3.7  | 8.34 | 12137.8 | 9.3   | HUMAN | ADPWR0   | Elongation factor 1-alpha 1 (Fragment)                       |
| 14840 | dirMS_041712_NAR_20mM_plus.10876.10876.2  | 2 | 7.95 | 0.691E+04         | (K)ISLEEL(K)S L E V L P E S T G D I R I                  | 147.3  | 643.8371 | 1286.659 | 0.0083   | 6.4   | 4.14 | 266161  | 5.68  | HUMAN | EP9PU    | Epipkain                                                     |
| 14841 | dirMS_041712_NAR_20mM_plus.12688.12688.2  | 2 | 7.95 | 0.275E+04         | (K)YDGLIH(K)I D L V I L P G A K I                        | 160.08 | 488.2764 | 975.551  | -0.0054  | -5.6  | 5.83 | 20480.2 | 9.91  | HUMAN | PE2913   | 60S ribosomal protein L11                                    |
| 14842 | dirMS_041712_NAR_20mM_plus.12997.12997.2  | 2 | 7.95 | 0.494E+05 M1m N6m | (-I)MFPFH(-)M P L I F P H P R I                          | 162.05 | 652.3439 | 1084.597 | 219.0833 | 6.9   | 9.5  | 39133.5 | 4.5   | HUMAN | Q8T091.2 | Isform 2 of Melanoma-associated antigen C3                   |
| 14843 | dirMS_041712_NAR_20mM_plus.14362.14362.3  | 3 | 7.95 | 0.300E+04 M61m    | (H)IIPGK(R)I K I P/G F M C Q/G D P F TRH I               | 170.67 | 538.9176 | 1598.745 | 15.9929  | -1.1  | 5.84 | 13378.8 | 6.27  | HUMAN | CN357    | Peptidyl-prolyl cis-trans isomerase                          |
| 14844 | dirMS_041712_NAR_20mM_plus.16607.16607.2  | 2 | 7.95 | 0.146E+05         | (K)IVYAK(K)Y K I V D M F V A L A T G E K I               | 185.95 | 482.8565 | 1364.706 | 0.0001   | -0.1  | 4.17 | 23799.1 | 9.48  | HUMAN | EP9PU    | Peptidyl-prolyl cis-trans isomerase B                        |
| 14845 | dirMS_041712_NAR_30mM_plus.12948.12948.2  | 2 | 7.95 | 0.146E+05         | (K)YIASVQ(K)Y I A L S V G V Y R I                        | 121    | 464.7467 | 928.489  | -0.0026  | -2.8  | 8.59 | 36914.7 | 6.33  | HUMAN | P14550   | Alcohol dehydrogenase (NADP+)                                |
| 14846 | dirMS_041712_NAR_30mM_plus.13194.13194.2  | 2 | 7.95 | 0.131E+06         | (K)INDLAV(K)M D I A I V V D V R I                        | 121.8  | 500.7769 | 1000.542 | 0.0043   | 4.3   | 4.21 | 76670.1 | 4.6   | HUMAN | P9338    | Nucleolin                                                    |
| 14847 | dirMS_041712_NAR_30mM_plus.15836.15836.2  | 2 | 7.95 | 0.325E+05         | (R)IIVSVP(R)F D I V S/G V P T I K I I                    | 136.32 | 563.7923 | 1126.578 | -0.0006  | -0.5  | 5.83 | 79373.4 | 4.96  | HUMAN | P13667   | Protein disulfide-isomerase A4                               |
| 14848 | dirMS_041712_NAR_30mM_plus.16677.16677.2  | 2 | 7.95 | 0.133E+06         | (R)IIVSVP(R)F D I V S/G V P T I K I I                    | 136.32 | 563.7923 | 1126.578 | -0.0006  | -0.5  | 5.83 | 79373.4 | 4.96  | HUMAN | P13667   | Protein disulfide-isomerase A4                               |
| 14849 | dirMS_041712_NAR_30mM_plus.20122.20122.2  | 2 | 7.95 | 0.122E+04         | (R)IALDTR(R)A L D I T M N F D V K I G I                  | 159.3  | 633.8315 | 1266.64  | 0.0159   | 12.5  | 4.21 | 68197.9 | 9.58  | HUMAN | BI1ANR0  | Poly(A) binding protein, cytoplasmic 4 (Inducible form)      |
| 14850 | dirMS_041712_NAR_30mM_plus.6015.6015.2    | 2 | 7.95 | 0.106E+05         | (K)MGGDGR(K)M G/G/D/R/A I R I                            | 85.85  | 417.2016 | 833.393  | 0.0025   | 3.3   | 5.59 | 31751.6 | 6.33  | HUMAN | F8V77    | Proliferation-associated protein 2G4                         |
| 14851 | dirMS_041712_NAR_50mM_plus.12290.12290.3  | 3 | 7.95 | 1.280E+05         | (R)IESDPR(R)S D P V P L K I T E F E V T K T I            | 132.68 | 584.2981 | 1750.874 | 0.0057   | 3     | 4.25 | 18909   | 6.21  | HUMAN | Q96H98   | UF05F56 protein C19orf10                                     |
| 14852 | dirMS_041712_NAR_50mM_plus.18053.18053.3  | 3 | 7.95 | 1.385E+05         | (K)IAQCDP(R)K A P L P V L A D I V P V R I                | 130.89 | 568.9584 | 1738.485 | 0.0012   | 3.1   | 6.65 | 161     | 7.96  | HUMAN | Q92763   | Fructose-bisphosphate aldolase A (Fragment)                  |
| 14853 | dirMS_041712_NAR_60mM_plus.18251.18251.3  | 3 | 7.95 | 1.730E+05         | (K)IQIOLD(K)I Q I V D L K V E L V S L Q L R V I          | 133.58 | 519.6254 | 1556.864 | -0.0026  | -1.7  | 4.56 | 10815.7 | 10.72 | HUMAN | Z2288    | 60S ribosomal protein L35                                    |
| 14854 | dirMS_041712_NAR_30mM_minus.13852.13852.2 | 2 | 7.94 | 0.488E+04         | (K)KJETLV(K)E Y T I L V D V R I                          | 128.87 | 529.7691 | 1058.515 | 0.0156   | 14.8  | 4.37 | 59484.7 | 6.61  | HUMAN | P54577   | Tyrosine-tRNA ligase, cytoplasmic                            |
| 14855 | dirMS_041712_NAR_40mM_minus.15827.15827.3 | 3 | 7.94 | 0.675E+05         | (K)IGLADP(K)K L I A P D P E D I V H L I K I              | 184.57 | 565.3111 | 1693.916 | -0.0028  | -1.7  | 4.54 | 16789.5 | 10.63 | HUMAN | ZKMKX5   | 40S ribosomal protein S13                                    |
| 14856 | dirMS_041712_NAR_50mM_plus.8828.8828.2    | 2 | 7.94 | 1.104E+05 M477m   | (K)ITDIPAR(R)I L K V I P A V T I A N K I                 | 118.22 | 401.5779 | 1186.723 | 15.9964  | 1.2   | 10   | 61224.7 | 5.7   | HUMAN | P10809   | 60 kDa heat shock protein, mitochondrial                     |
| 14857 | dirMS_041712_NAR_120mM_plus.10777.10777.3 | 3 | 7.94 | 1.483E+05 3306    | (R)IDHMS(R)R H M S V L V P R E A H K I                   | 109.9  | 654.92   | 1759.833 | 203.6861 | -6.7  | 8.51 | 51648.4 | 5.55  | HUMAN | EP9PU    | Protein phosphatase 1A                                       |
| 14858 | dirMS_041712_NAR_20mM_plus.12606.12606.3  | 3 | 7.94 | 0.348E+05         | (K)IISMASC(K)I S I N J A S C T T T N C L A I P L A V K I | 159.53 | 613.9768 | 1833.92  | -0.0039  | -2.1  | 8.75 | 31718.5 | 7.17  | HUMAN | FE7U4    | Glyceraldehyde-3-phosphate dehydrogenase                     |
| 14859 | dirMS_041712_NAR_20mM_plus.12829.12829.2  | 2 | 7.94 | 0.364E+05         | (K)ISELEAK(K)S L E I V A A L R I A                       | 161.65 | 565.3132 | 1129.621 | -0.002   | -1.8  | 4.53 | 56607.4 | 5.37  | HUMAN | F8V84    | Keratin, type II cytoskeletal 8                              |
| 14860 | dirMS_041712_NAR_20mM_plus.18538.18538.3  | 3 | 7.94 | 0.215E+05         | (R)ILSVEAK(R)I S V E E A A V A G V I G G E I K I         | 198.57 | 629.0001 | 1884.991 | -0.0056  | -2.9  | 4.09 | 266161  | 5.68  | HUMAN | EP9PU    | Epipkain                                                     |
| 14861 | dirMS_041712_NAR_20mM_plus.8996.8996.2    | 2 | 7.94 | 0.345E+05         | (K)ILGVEA(K)K S L E I V A A L R I A                      | 131.9  | 572.3303 | 1593.807 | -0.0007  | -0.6  | 4.21 | 72338.8 | 6.05  | HUMAN | Z2288    | 60S ribosomal protein L35                                    |
| 14862 | dirMS_041712_NAR_30mM_plus.20503.20503.2  | 2 | 7.94 | 0.179E+05         | (R)ILGVEA(K)K S L E I V A A L R I A                      | 161.18 | 599.8397 | 1198.679 | -0.0069  | -5.7  | 4.53 | 61411.3 | 8.74  | HUMAN | P10155   | 60 kDa SsA ribonucleoprotein                                 |
| 14863 | dirMS_041712_NAR_30mM_plus.5993.5993.2    | 2 | 7.94 | 0.286E+04         | (R)ITDSDR(R)T D D S I L Q V N T S S E G S R I            | 85.65  | 770.3467 | 1539.688 | -0.0012  | -1.3  | 4.37 | 66105.7 | 7.3   | HUMAN | ABMQB8   | Fragile X mental retardation protein 1                       |
| 14864 | dirMS_041712_NAR_30mM_plus.7883.7900.2    | 2 | 7.94 | 0.824E+05         | (R)IDYDOR(R)D Y I D I D M S P R R I                      | 95.49  | 499.6972 | 998.388  | -0.0013  | -1.3  | 3.93 | 51260.6 | 5.39  | HUMAN | PE1978   | Heterogeneous nuclear ribonucleoprotein K                    |
| 14865 | dirMS_041712_NAR_30mM_plus.18093.18093.3  | 3 | 7.94 | 1.318E+05         | (R)IGGPNTR(R)E L A P L P V K V N P P S R I               | 178.95 | 422.3522 | 1096.549 | -0.0007  | -3.8  | 5.86 | 46481.2 | 7.95  | HUMAN | ZTUL96   | Casoin kinase II subunit alpha                               |
| 14866 | dirMS_041712_NAR_50mM_plus.15395.15492.3  | 3 | 7.94 | 0.451E+06         | (R)IMSPGL(R)M S P I G L M H M A S S I E R I              | 150.25 | 538.6607 | 1613.777 | 0.0101   | 6.3   | 5.3  | 77995.7 | 9.09  | HUMAN | PS2272   | Heterogeneous nuclear ribonucleoprotein M                    |
| 14867 | dirMS_041712_NAR_50mM_plus.9225.9225.3    | 3 | 7.94 | 1.876E+05         | (K)ITAVCD(K)I T A V C D P P P L G K I                    | 116.07 | 442.9121 | 1326.72  | 0.0019   | 1.4   | 8.41 | 50199.4 | 4.75  | HUMAN | AMNNZ2   | Tubulin beta-8 chain-like protein LOC260334                  |
| 14868 | dirMS_041712_NAR_30mM_minus.15639.15639.2 | 2 | 7.93 | 0.154E+05         | (K)AMTGV(K)M A M T G V E I Q W P V R I A                 | 138.4  | 669.3172 | 1337.631 | -0.0036  | -2.7  | 6.04 | 56186.7 | 5.47  | HUMAN | BD4UR    | T-complex protein 1 subunit gamma                            |
| 14869 | dirMS_041712_NAR_30mM_minus.17244.17244.2 | 2 | 7.93 | 0.265E+05         | (K)FEDTFR(K)F I D E I F N I L I U K I                    | 147.73 | 577.7894 | 1514.573 | -0.0013  | -1.1  | 4.14 | 13378.8 | 6.27  | HUMAN | CN357    | Peptidyl-prolyl cis-trans isomerase                          |
| 14870 | dirMS_041712_NAR_30mM_minus.6959.6959.2   | 2 | 7.93 | 0.106E+04         | (R)ISLEEL(K)S L E V L P E S T G D I R I                  | 92.15  | 475.2682 | 1145.527 | -0.0021  | -1.9  | 5.99 | 35388.9 | 5.97  | HUMAN | PT2441   | Serpin RNA effector molecule homolog (Fragment)              |
| 14871 | dirMS_041712_NAR_30mM_minus.7279.7279.2   | 2 | 7.93 | 0.381E+05         |                                                          |        |          |          |          |       |      |         |       |       |          |                                                              |



|       |                                            |   |      |   |          |                                                     |         |          |          |          |       |       |          |       |       |        |                                                                             |
|-------|--------------------------------------------|---|------|---|----------|-----------------------------------------------------|---------|----------|----------|----------|-------|-------|----------|-------|-------|--------|-----------------------------------------------------------------------------|
| 15038 | dirMS_041712_NAR_40mM_plus2.13332.13332.3  | 3 | 7.87 | 0 | 3.20E+05 | (K)IQLEMEAK(K)QJLM E A P H V/V/G/T P G R V          | 144.1   | 540.2954 | 1618.873 | -0.0017  | -1.1  | 6.75  | 20859.5  | 4.85  | HUMAN | J3K25  | Eukaryotic initiation factor 4A1 (Fragment)                                 |
| 15039 | dirMS_041712_NAR_50mM_plus2.10205.10205.3  | 3 | 7.87 | 0 | 6.39E+04 | (R)ITVTSHT(R)I V I T S/H P G Q I V H                | 120.92  | 464.364  | 1392.821 | 0.0025   | 1.8   | 8.44  | 27999.4  | 5.61  | HUMAN | B7250  | DNA homolog subfamily A member 1                                            |
| 15040 | dirMS_041712_NAR_50mM_plus2.11178.11178.3  | 3 | 7.87 | 1 | 8.51E+04 | (R)ISGATP(R)S A I A E T V G I L V K E K S           | 126.64  | 464.364  | 1392.821 | 0.0025   | 1.8   | 8.44  | 27999.4  | 5.61  | HUMAN | B7250  | DNA homolog subfamily A member 1                                            |
| 15041 | dirMS_041712_NAR_60mM_plus.11510.11510.3   | 3 | 7.87 | 0 | 3.70E+05 | (R)ISLGGT(R)S L G T A D W/H F E N I K               | 116.842 | 411.2075 | 1231.607 | 0.0014   | -1.1  | 5.3   | 27557.2  | 11.05 | HUMAN | EP9861 | DnaI homolog subunit 4                                                      |
| 15042 | dirMS_041712_NAR_60mM_plus.14282.14282.3   | 3 | 7.87 | 1 | 1.22E+06 | (K)JAVLFC(L)K A V A F C L S/E D K N I K             | 131.62  | 437.2332 | 1309.682 | -0.0003  | -2.3  | 6.11  | 22956    | 8.8   | HUMAN | EPK25  | Cofilin-1                                                                   |
| 15043 | dirMS_041712_NAR_60mM_plus.18349.18349.3   | 3 | 7.87 | 1 | 5.69E+05 | (R)IRJDS(L)R I R D I S L/S A (Q) L S J Q L Q K      | 153.68  | 567.3254 | 1699.97  | -0.005   | -5    | 8.75  | 63136.9  | 5.83  | HUMAN | DR6Q3  | Prelamin-A/C                                                                |
| 15044 | dirMS_041712_NAR_20mM_minus.12094.12094.2  | 2 | 7.86 | 0 | 9.21E+05 | (R)IVGSS(L)R V A E T V G D I D L V H R (R)          | 170.48  | 761.8733 | 1506.197 | 15.9225  | -4.7  | 4.03  | 43733.3  | 5.26  | HUMAN | FRV29  | Keratin, type I cytoskeletal 18                                             |
| 15045 | dirMS_041712_NAR_30mM_minus2.15704.15704.2 | 2 | 7.86 | 0 | 9.77E+04 | (R)IGSTDN(R)E S Y T D N L/M D I O E H R A           | 138.77  | 683.3009 | 1365.595 | -0.0006  | -0.4  | 3.84  | 58214.7  | 5.25  | HUMAN | B40E17 | T-complex protein 1 subunit theta                                           |
| 15046 | dirMS_041712_NAR_50mM_minus2.10203.10203.3 | 3 | 7.86 | 0 | 1.60E+05 | (K)EMNPA(K)E m N/P A L G/D I C L H G I              | 125.95  | 505.2416 | 1497.719 | 15.9914  | -2.3  | 5.32  | 49982    | 5.86  | HUMAN | B40D78 | T-complex protein 1 subunit epsilon                                         |
| 15047 | dirMS_041712_NAR_50mM_minus2.11553.11553.3 | 3 | 7.86 | 0 | 2.08E+05 | (K)TEEPEE(K)T G/E I E F/G T I G m R P N A K(N)      | 134.13  | 579.6239 | 1720.869 | 15.9885  | -3.7  | 5.81  | 38222.2  | 5.77  | HUMAN | EP9K1  | Protein arginine N-methyltransferase 1                                      |
| 15048 | dirMS_041712_NAR_50mM_minus2.13157.13157.3 | 3 | 7.86 | 1 | 1.18E+05 | (K)TEEMTE(R)T E M E N F P V I L K I K D             | 142.92  | 494.2621 | 1488.772 | 0.0002   | 0.1   | 4.78  | 13588.1  | 4.66  | HUMAN | FRV07  | Keratin, type I cytoskeletal 8 (Fragment)                                   |
| 15049 | dirMS_041712_NAR_50mM_minus.15188.15188.3  | 3 | 7.86 | 1 | 1.33E+05 | (K)IVSGGL(R)K V W S T G E I F I E I R               | 136.6   | 493.9372 | 1488.802 | -0.0046  | -3.1  | 6.07  | 30711.4  | 7.15  | HUMAN | CT13   | Programmed cell death protein 5                                             |
| 15050 | dirMS_041712_NAR_50mM_minus2.18128.18128.3 | 3 | 7.86 | 1 | 1.73E+05 | (K)IGLAA(K)K I V L A A D E S T G S I A K R L        | 114.03  | 496.9372 | 1488.802 | -0.0046  | -3.1  | 6.07  | 30711.4  | 7.15  | HUMAN | H3BP58 | Fructose-bisphosphate aldolase A (Fragment)                                 |
| 15051 | dirMS_041712_NAR_50mM_minus2.8390.8390.3   | 3 | 7.86 | 1 | 1.99E+05 | (K)IGLAA(K)K I V L A A D E S T G S I A K R L        | 115.2   | 496.9372 | 1488.802 | -0.0046  | -3.1  | 6.07  | 30711.4  | 7.15  | HUMAN | H3BP58 | Fructose-bisphosphate aldolase A (Fragment)                                 |
| 15052 | dirMS_041712_NAR_60mM_minus.14761.14761.3  | 3 | 7.86 | 0 | 4.34E+05 | (K)JAVPWP(K)A V G H P F V I D Q L G R I             | 141.95  | 431.9182 | 1291.743 | -0.0026  | -2    | 9.8   | 124254.8 | 5.71  | HUMAN | Q14980 | Exportin-1                                                                  |
| 15053 | dirMS_041712_NAR_120mM_plus.8022.8022.2    | 2 | 7.86 | 0 | 5.19E+05 | (R)IQNVMP(R)K V M G V M P S F S H S R G             | 99.72   | 567.3254 | 1699.97  | 0.0043   | 3.8   | 9.75  | 16060.2  | 4.05  | HUMAN | FR919  | 40S ribosomal protein S19                                                   |
| 15054 | dirMS_041712_NAR_20mM_plus.11220.11220.2   | 2 | 7.86 | 0 | 2.10E+05 | (K)JGAPV(K)I V T P V V S E R L R                    | 150.02  | 542.8186 | 1084.636 | -0.0026  | -5.7  | 6     | 13798.9  | 10.17 | HUMAN | PK2651 | 40S ribosomal protein S25                                                   |
| 15055 | dirMS_041712_NAR_20mM_plus.13566.13566.2   | 2 | 7.86 | 0 | 1.45E+05 | (K)IMSDAF(K)M I S D A/V P E L K A                   | 165.55  | 566.7967 | 1116.597 | 15.9892  | -5    | 4.37  | 31330.8  | 9.26  | HUMAN | EP9D82 | Malate dehydrogenase, mitochondrial                                         |
| 15056 | dirMS_041712_NAR_20mM_plus.19187.19187.2   | 2 | 7.86 | 0 | 9.61E+04 | (K)SMLN(L)K S L M V L A T F G K Q(K)                | 203.9   | 567.8286 | 1134.652 | -0.0018  | -1.6  | 8.47  | 18172.6  | 7.97  | HUMAN | FRV02  | Endoplasmic reticulum resident protein 29                                   |
| 15057 | dirMS_041712_NAR_20mM_plus.19295.19295.3   | 3 | 7.86 | 0 | 2.73E+05 | (R)ILAGTP(R)I A G E T P G I E V I H V A V Q R S     | 204.33  | 541.9731 | 1623.966 | -0.0017  | -1    | 4.53  | 118930.9 | 5.49  | HUMAN | Q22314 | Ubiquitin-like modifier-activating enzyme 1                                 |
| 15058 | dirMS_041712_NAR_30mM_plus2.11824.11824.2  | 2 | 7.86 | 0 | 1.26E+06 | (R)IGGGGM(R)G G G G N T F G P G S G R I G           | 114.42  | 680.3175 | 1377.629 | -0.0017  | -1.2  | 9.75  | 37486.1  | 9.03  | HUMAN | P22626 | Heterogeneous nuclear ribonucleoproteins A2/B1                              |
| 15059 | dirMS_041712_NAR_30mM_plus2.7042.7042.2    | 2 | 7.86 | 0 | 1.83E+04 | (R)ISGGGG(R)G G G G/G/G/G L S L V M D L K K I C     | 92.03   | 616.8023 | 1232.598 | -0.0005  | -0.4  | 9.47  | 62391.5  | 5.13  | HUMAN | P35527 | Keratin, type I cytoskeletal 9                                              |
| 15060 | dirMS_041712_NAR_40mM_plus.13902.13902.3   | 3 | 7.86 | 1 | 3.97E+05 | (R)IVGFEA(R)Q V I F E A T K I Q P I F T F I A A I Q | 147.58  | 616.8023 | 1232.598 | -0.0005  | -0.4  | 9.47  | 62391.5  | 5.13  | HUMAN | CJH19  | Cathepsin D light chain (Fragment)                                          |
| 15061 | dirMS_041712_NAR_40mM_plus2.8419.8419.2    | 2 | 7.86 | 0 | 6.97E+04 | (R)IDSSVQ(R)I S V S V S V S V R H R                 | 110.07  | 538.2862 | 1075.574 | -0.0001  | -8.5  | 6     | 20676.9  | 9.84  | HUMAN | FRW0E4 | Heat shock protein beta-1                                                   |
| 15062 | dirMS_041712_NAR_50mM_plus2.20931.20931.3  | 3 | 7.86 | 1 | 2.08E+05 | (R)IGGGG(R)S G G G I V S L L V M D L K K I C        | 179.03  | 591.3291 | 1771.974 | -0.0002  | -0.4  | 8.59  | 21858.3  | 4.58  | HUMAN | FSQW5  | Chromodomain-helicase-DNA-binding protein 4                                 |
| 15063 | dirMS_041712_NAR_50mM_plus2.6444.6444.3    | 3 | 7.86 | 1 | 1.31E+05 | (R)IVQED(R)I V I E Q D I A T M P P K V G R H        | 98.88   | 495.8283 | 1469.778 | 15.9923  | -1.8  | 6.07  | 73386.6  | 8.73  | HUMAN | B4DX77 | ATP-dependent RNA helicase DDX3Y                                            |
| 15064 | dirMS_041712_NAR_60mM_plus.10141.10141.3   | 3 | 7.86 | 1 | 1.48E+06 | (K)IFRDEG(K)F R D G E E I A G V I G P R H           | 111.47  | 551.593  | 1652.766 | -0.0191  | -1.1  | 4.32  | 55361.8  | 6.42  | HUMAN | G5EA52 | Protein disulfide isomerase family A, member 3, isoform CRA_b               |
| 15065 | dirMS_041712_NAR_60mM_plus.11537.11537.3   | 3 | 7.86 | 0 | 1.67E+06 | (K)ADVAP(R)K Q I V L A R G G G D T F I K R          | 116.72  | 472.9241 | 1416.759 | -0.0012  | -1.2  | 8.79  | 7323.9   | 9.4   | HUMAN | DR6DC  | Histidine triad nucleotide-binding protein 4                                |
| 15066 | dirMS_041712_NAR_60mM_plus.12665.12665.3   | 3 | 7.86 | 1 | 2.01E+05 | (K)IVGK(R)K V I L F I R G I V G P P V E K I K       | 122.87  | 494.5784 | 1481.767 | -0.0026  | -2.8  | 6.11  | 22956    | 8.8   | HUMAN | EPK25  | Cofilin-1                                                                   |
| 15067 | dirMS_041712_NAR_120mM_minus.17218.17218.3 | 3 | 7.85 | 1 | 7.58E+04 | (R)ILGAL(R)E V C A L R E T V I V A V R A R I        | 143.88  | 452.2751 | 1354.816 | -0.0058  | -4.3  | 9.6   | 75110.9  | 6.11  | HUMAN | CJH11  | Wilfibrand factor A domain-containing protein 7                             |
| 15068 | dirMS_041712_NAR_120mM_minus.20782.20782.4 | 4 | 7.85 | 1 | 5.83E+05 | (R)ISLHD(R)R L H D A L C V L A Q T V K D S R T      | 173.1   | 479.0049 | 1912.991 | 0.0068   | 3.6   | 6.47  | 57204.9  | 6.01  | HUMAN | FSQW65 | T-complex protein 1 subunit beta                                            |
| 15069 | dirMS_041712_NAR_120mM_minus.7969.8034.2   | 2 | 7.85 | 0 | 4.26E+05 | (K)IFHQLM(K)F H S D G K P V Q D R I G               | 97.85   | 459.7343 | 918.461  | -0.0001  | -0.1  | 9.75  | 10225.7  | 7.97  | HUMAN | PA9458 | Signal recognition particle 9 beta protein                                  |
| 15070 | dirMS_041712_NAR_20mM_minus.11141.11141.2  | 2 | 7.85 | 0 | 1.99E+04 | (R)IRJDS(L)R I R D I S L/S A (Q) L S J Q L Q K      | 153.68  | 567.3254 | 1699.97  | -0.005   | -5    | 8.75  | 63136.9  | 5.83  | HUMAN | DR6Q3  | Prelamin-A/C                                                                |
| 15071 | dirMS_041712_NAR_20mM_minus.13155.13155.2  | 2 | 7.85 | 0 | 2.98E+05 | (K)NDJAAE(K)K D A I I N L E L M V R I               | 181.98  | 588.7948 | 1160.558 | 15.9843  | -9    | 4.7   | 28354    | 7.11  | HUMAN | B4DXH  | 26S proteasome non-ATPase regulatory subunit 7                              |
| 15072 | dirMS_041712_NAR_20mM_minus.14445.14445.2  | 2 | 7.85 | 0 | 2.15E+05 | (K)IDAGVAM(K)D A G V I A M N P T N V T F D A K R L  | 198.23  | 539.3503 | 1197.695 | -0.0017  | -1.4  | 5.84  | 58502.6  | 6.09  | HUMAN | B4DXY3 | Heat shock 70 kDa protein 1-like                                            |
| 15073 | dirMS_041712_NAR_30mM_minus2.16141.16141.2 | 2 | 7.85 | 0 | 1.41E+05 | (K)IGSFLP(L)K Q C S F L P P D P Q V I Q(K)          | 141.02  | 656.3051 | 1311.604 | -0.0009  | -0.7  | 5.83  | 63888.6  | 5.11  | HUMAN | EA1VU8 | Prospasin                                                                   |
| 15074 | dirMS_041712_NAR_30mM_minus2.6752.6752.2   | 2 | 7.85 | 0 | 3.89E+05 | (K)IVLEERE(K)V L V L V E E Q R H R                  | 90.38   | 516.2557 | 1031.5   | 0.0027   | 2.7   | 4.09  | 54214.9  | 5.66  | HUMAN | CJH813 | Caldesmon (Fragment)                                                        |
| 15075 | dirMS_041712_NAR_40mM_minus2.12665.12665.3 | 3 | 7.85 | 1 | 2.01E+05 | (K)IVGK(R)K V I L F I R G I V G P P V E K I K       | 122.87  | 494.5784 | 1481.767 | -0.0026  | -2.8  | 6.11  | 22956    | 8.8   | HUMAN | EPK25  | Cofilin-1                                                                   |
| 15076 | dirMS_041712_NAR_40mM_minus2.14218.14218.3 | 3 | 7.85 | 0 | 1.23E+05 | (R)ITEDITS(R)T E D T A T S G G I P D L A D L V R I  | 168.55  | 606.3366 | 1948.997 | -0.0022  | -1.1  | 4.22  | 35067    | 5.55  | HUMAN | ETFR70 | RuvB-like 1                                                                 |
| 15077 | dirMS_041712_NAR_50mM_minus2.10776.10776.3 | 3 | 7.85 | 1 | 2.88E+05 | (K)IQNVAM(K)Q I V L A M N P T N V T F D A K R L     | 192.20  | 602.6379 | 1805.896 | -0.0029  | -1.6  | 8.75  | 20669.4  | 6.74  | HUMAN | EPK54  | Heat shock cognate 71 kDa protein (Fragment)                                |
| 15078 | dirMS_041712_NAR_50mM_minus2.10776.10776.3 | 3 | 7.85 | 1 | 2.38E+05 | (K)ITVYAG(K)I V T V A V G A V S G K P V C S I R K   | 121.13  | 555.2923 | 1657.869 | -0.0027  | -4    | 8.72  | 18080.7  | 7.92  | HUMAN | ETFLW0 | Protein Di-1                                                                |
| 15079 | dirMS_041712_NAR_60mM_minus.13566.13566.2  | 2 | 7.85 | 1 | 712E+04  | (R)IGGGG(R)S G G G I V S L L V M D L K K I C        | 94.05   | 616.8023 | 1232.598 | -0.0005  | -0.7  | 11.61 | 15607.8  | 3.7   | HUMAN | EP9D82 | Proteasome (Prosome, macropain) subunit, beta type 2, isoform CRA_b         |
| 15080 | dirMS_041712_NAR_60mM_minus.6867.6867.3    | 3 | 7.85 | 1 | 5.61E+05 | (R)IVDDML(R)V D D E D I D V D T T K I K             | 96.77   | 454.8843 | 1330.649 | -0.0089  | -0.6  | 5.51  | 31718.7  | 17.17 | HUMAN | ETFL74 | Glutathylate 3-phosphate dehydrogenase                                      |
| 15081 | dirMS_041712_NAR_120mM_plus.17813.17813.3  | 3 | 7.85 | 1 | 1.73E+06 | (R)IKAHQ(K)R A Q M S I L E Q F T R Y                | 146.13  | 474.2134 | 1404.705 | 15.9744  | -14.4 | 8.76  | 9196.3   | 5.85  | HUMAN | FSQ2K3 | 1-phosphatidylinositol 4,5-bisphosphate phosphodiesterase zeta-1 (Fragment) |
| 15082 | dirMS_041712_NAR_120mM_plus.7084.7084.3    | 3 | 7.85 | 0 | 3.43E+05 | (K)ISQSDS(K)K Q V S D P V Q D R I G                 | 90.42   | 436.2209 | 1306.639 | 0.0095   | 7.3   | 5.68  | 13194    | 9.99  | HUMAN | EP970  | Chitinase domain-containing protein 1 (Fragment)                            |
| 15083 | dirMS_041712_NAR_20mM_plus.11943.11943.2   | 2 | 7.85 | 0 | 1.12E+05 | (R)IVYDQ(R)I V Y I D V G S I P R K I                | 156.08  | 612.3237 | 1243.607 | -0.0073  | -5.9  | 4.37  | 39066    | 6.61  | HUMAN | ADP4P4 | Selenium binding protein 1 (Fragment)                                       |
| 15084 | dirMS_041712_NAR_20mM_plus.14319.14319.2   | 2 | 7.85 | 0 | 3.41E+04 | (R)IUALTN(R)I A I L I T D N A L V A R S I           | 170.65  | 585.8432 | 1170.684 | -0.005   | -4.2  | 5.84  | 24489.6  | 10.74 | HUMAN | ABMUD9 | 60S ribosomal protein L7                                                    |
| 15085 | dirMS_041712_NAR_20mM_plus.16471.16471.3   | 3 | 7.85 | 0 | 6.82E+04 | (R)IJGATS(R)I G I A T A S V G G L m F m L m K V R I | 185.8   | 588.2872 | 1712.86  | 31.9873  | -1.5  | 4.37  | 19439.5  | 4.97  | HUMAN | BSM1D7 | Chromobox protein homolog 1 (Fragment)                                      |
| 15086 | dirMS_041712_NAR_30mM_plus2.7573.7573.2    | 2 | 7.85 | 0 | 2.11E+05 | (R)IAVJGE(R)I A V I V V G G R I G                   | 93.87   | 400.7369 | 800.462  | 0.004    | 5.1   | 6     | 27082.1  | 9.06  | HUMAN | DR6D6  | WD repeat-containing protein 1 (Fragment)                                   |
| 15087 | dirMS_041712_NAR_30mM_plus2.1372.1372.3    | 3 | 7.85 | 1 | 1.07E+05 | (R)INLPSR(K)P S F S P I P P T A M I S G K S I       | 117.47  | 649.0215 | 1741.952 | 201.0983 | 9.7   | 10    | 20592.9  | 8.96  | HUMAN | O29245 | Transmembrane protein 131                                                   |
| 15088 | dirMS_041712_NAR_50mM_plus2.1074.1074.3    | 3 | 7.85 | 1 | 2.82E+05 | (R)IMVQV(K)R V A E E D I E D A D V D T T K I K      | 124.63  | 494.5784 | 1481.767 | -0.0026  | -2.8  | 4.66  | 13297.4  | 5.2   | HUMAN | EP9D82 | Transcription intermediary factor 1-beta                                    |
| 15089 | dirMS_041712_NAR_50mM_plus2.14895.14895.3  | 3 | 7.85 | 1 | 3.55E+05 | (M)KIRML(K)K V R m L V A E m I G K(N)               | 146.43  | 493.2734 | 1258.73  | 219.0756 | 0.009 | 9.99  | 22643.3  | 4.51  | HUMAN | B4DH5  | Cylin-D1-binding protein 1                                                  |
| 15090 | dirMS_041712_NAR_50mM_plus2.17004.17004.3  | 3 | 7.85 | 1 | 1.94E+06 | (R)IVTVE(R)I V T V T E I G D V I G D V I K R I      | 156.75  | 534.308  | 1600.927 | -0.0174  | -10.9 | 6.04  | 139883.7 | 8.06  | HUMAN | PS3621 | Oocytein subunit alpha                                                      |
| 15091 | dirMS_041712_NAR_60mM_plus.9794.9794.3     | 3 | 7.85 | 1 | 2.15E+05 | (R)IGVGL(R)G I V G L V Q E G D I F R R I            | 109.68  | 415.8936 | 1245.659 | -0.0076  | -6.1  | 6.07  | 180453.7 | 6.04  | HUMAN | HOYQ2  | YLP motif-containing protein 1 (Fragment)                                   |
| 15092 | dirMS_041712_NAR_120mM_minus.4904.4904.3   | 3 | 7.84 |   |          |                                                     |         |          |          |          |       |       |          |       |       |        |                                                                             |

|       |                                            |   |      |   |           |       |                                                      |                         |        |          |          |          |       |       |          |       |       |        |                                                                              |
|-------|--------------------------------------------|---|------|---|-----------|-------|------------------------------------------------------|-------------------------|--------|----------|----------|----------|-------|-------|----------|-------|-------|--------|------------------------------------------------------------------------------|
| 15147 | dirMS_041712_NAR_50mM_minus1.14091.14091.3 | 3 | 7.82 | 1 | 2.896E+05 | M93m  | (KXELVAm)(K)SEI LVA A E E E L K(A)                   | mDeacid methionine      | 148.75 | 564.6215 | 1675.857 | 15.9928  | -1.2  | 4.32  | 18679.2  | 5.61  | HUMAN | BADWW1 | ADP-ribosylation factor-like protein 1                                       |
| 15148 | dirMS_041712_NAR_50mM_plus.7735.7735.4     | 3 | 7.82 | 1 | 1.666E+04 | M55m  | (KILADQE)(K)IA/E Q/A E Y D V A C A C K S             | mDeacid methionine-mCid | 111.05 | 639.9511 | 1901.819 | 16.0197  | 12.9  | 4.32  | 5919.6   | 4.73  | HUMAN | ESR6E1 | 14-3-3 protein zeta/delta                                                    |
| 15149 | dirMS_041712_NAR_50mM_plus.8335.8335.4     | 3 | 7.82 | 0 | 7.555E+04 | M25m  | (KHTPMS)(K)T E F N P D V V D D G V K L               | mDeacid methionine      | 142.65 | 597.3237 | 1393.835 | 0.005    | 3.6   | 6.025 | 37681.5  | 5.93  | HUMAN | DBP6F2 | Phosphoribosylaminimidazole carboxylase                                      |
| 15150 | dirMS_041712_NAR_20mM_plus.17087.17087.4   | 4 | 7.82 | 2 | 6.276E+05 | M25m  | (KHTPEPDR)(R)T D P E K G W L G R T A R G             | mN-acetylglucosamine    | 142.4  | 479.9541 | 1713.903 | 203.5607 | -11.8 | 8.75  | 91877.7  | 6.48  | HUMAN | BADLN2 | FN3-binding protein                                                          |
| 15151 | dirMS_041712_NAR_20mM_plus.11413.11413.2   | 2 | 7.82 | 0 | 2.166E+05 | M25m  | (R)YALVDA (R)Y A L V D A T Y E T K E                 | mDeacid methionine      | 151.1  | 669.3157 | 1337.626 | -0.0019  | -1.4  | 4.37  | 22956    | 8.8   | HUMAN | EPN25  | Cofilin-1                                                                    |
| 15152 | dirMS_041712_NAR_20mM_plus.19107.19107.2   | 2 | 7.82 | 0 | 2.706E+04 | M25m  | (R)ISTGEAR (R)S T E V A F V D F A S Q E V A E K A    | mDeacid methionine      | 203.23 | 921.4477 | 1841.892 | -0.0035  | -1.9  | 4.25  | 24249.1  | 6.99  | HUMAN | DBR6M0 | Heterogeneous nuclear ribonucleoprotein H (Fragment)                         |
| 15153 | dirMS_041712_NAR_20mM_plus.17044.17044.2   | 2 | 7.82 | 0 | 2.272E+05 | M25m  | (K)ACGNR (K)G L G N G P A P C E L V R                | mDeacid methionine      | 140.65 | 607.3242 | 1390.825 | 0.0005   | 3.6   | 6.025 | 37681.5  | 5.93  | HUMAN | DBP6F2 | Phosphoribosylaminimidazole carboxylase                                      |
| 15154 | dirMS_041712_NAR_30mM_plus2.23521.23521.2  | 2 | 7.82 | 0 | 1.806E+05 | M25m  | (R)IAUUEY (R)I A I Y E L L E K E                     | mDeacid methionine      | 190.02 | 555.3331 | 1109.661 | -0.0016  | -1.4  | 6     | 19024.8  | 9.99  | HUMAN | FRU121 | 40S ribosomal protein S10                                                    |
| 15155 | dirMS_041712_NAR_30mM_plus2.7022.7023.2    | 2 | 7.82 | 0 | 1.556E+05 | M25m  | (R)ISLGGTY (R)S L G Y T G R A R                      | mDeacid methionine      | 150.92 | 412.7157 | 824.426  | -0.002   | -2.4  | 8.46  | 12587.1  | 5.85  | HUMAN | QBNFU3 | Thiosulfate sulfurtransferase/hydroselenase-like domain-containing protein 1 |
| 15156 | dirMS_041712_NAR_40mM_plus2.10352.10352.2  | 2 | 7.82 | 0 | 2.876E+04 | M25m  | (K)YNNKVM (K)Y N N J C W L A R T                     | mDeacid methionine      | 125.6  | 548.7522 | 1096.499 | -0.0022  | -2    | 8.75  | 55416    | 8.63  | HUMAN | HOYM31 | Phosphoenolpyruvate carboxykinase (GTP), mitochondrial                       |
| 15157 | dirMS_041712_NAR_40mM_plus2.10806.10806.3  | 3 | 7.82 | 1 | 4.32E+05  | M25m  | (R)IDGKLV (R)G K L V S S S D V L P K L               | mDeacid methionine      | 128.65 | 491.9315 | 1473.738 | 0.0004   | 0.3   | 5.46  | 56607.4  | 5.37  | HUMAN | FBX04  | Keratin, type II cytoskeletal 8                                              |
| 15158 | dirMS_041712_NAR_40mM_plus2.1296.1296.2    | 2 | 7.82 | 0 | 2.674E+05 | M25m  | (K)AASDAI (K)A S D A I V W P T P H R                 | mDeacid methionine      | 139.53 | 472.9541 | 1031.563 | -0.0015  | -1.4  | 5.32  | 12927.1  | 6.4   | HUMAN | KTZ420 | 14-3-3 protein epsilon (Fragment)                                            |
| 15159 | dirMS_041712_NAR_40mM_plus2.13320.13320.3  | 3 | 7.82 | 1 | 1.17E+05  | M25m  | (R)IETTEK (R)T E T P V P V N P V K G                 | mDeacid methionine      | 144.53 | 588.6444 | 1763.921 | -0.0028  | -1.6  | 4.79  | 53377.8  | 5.74  | HUMAN | Q15149 | Plectin                                                                      |
| 15160 | dirMS_041712_NAR_50mM_plus2.11616.11016.3  | 3 | 7.82 | 0 | 1.94E+05  | M25m  | (K)ADGDR (K)A D G D R P P K Y K S                    | mDeacid methionine      | 125.1  | 448.2419 | 1342.711 | -0.0002  | -0.2  | 6     | 15633.5  | 9.15  | HUMAN | HBM30X | Fructose-bisphosphate aldolase A (Fragment)                                  |
| 15161 | dirMS_041712_NAR_50mM_plus2.6989.6989.3    | 3 | 7.82 | 1 | 6.65E+05  | M25m  | (K)IVAKDR (K)I V A D P S V T A N K K                 | mDeacid methionine      | 101.85 | 504.2628 | 1510.775 | -0.0009  | -0.6  | 5.96  | 25445.8  | 5.52  | HUMAN | ABM9V0 | Lactate dehydrogenase (Fragment)                                             |
| 15162 | dirMS_041712_NAR_60mM_plus.19425.19425.3   | 3 | 7.82 | 1 | 1.695E+05 | M25m  | (K)RSDFV (K)R S Q V V D W P P T G F R                | mDeacid methionine      | 159.92 | 580.2383 | 1740.853 | 0.0002   | 0.1   | 8.75  | 49012.3  | 4.9   | HUMAN | ABM0E5 | Tubulin alpha-4b chain                                                       |
| 15163 | dirMS_041712_NAR_60mM_plus.20659.20659.3   | 3 | 7.82 | 1 | 4.94E+05  | M25m  | (R)SDSVA (R)S D V S A D L R E M S R S                | mDeacid methionine      | 118.05 | 507.5883 | 1520.373 | -0.0013  | 8.6   | 4.32  | 34709.6  | 4.98  | HUMAN | Q14579 | Carotenusubunit epsilon                                                      |
| 15164 | dirMS_041712_NAR_60mM_plus.6746.6747.3     | 3 | 7.82 | 1 | 4.05E+05  | M25m  | (R)GPPPPP (R)G P P P P T A S E P R R S               | mDeacid methionine      | 93.85  | 487.2585 | 1459.765 | -0.0043  | -2.9  | 9.6   | 124217.1 | 8.81  | HUMAN | Q14776 | Transcription elongation regulator 1                                         |
| 15165 | dirMS_041712_NAR_120mM_plus.17103.17103.4  | 4 | 7.81 | 1 | 4.65E+05  | M25m  | (K)AAQASE (K)A Q A S D L E K H D E K S               | mDeacid methionine      | 117.83 | 417.7202 | 1667.86  | -0.0009  | -0.6  | 4.75  | 37710.6  | 6.36  | HUMAN | PR7837 | Transaldolase                                                                |
| 15166 | dirMS_041712_NAR_120mM_plus.14802.14802.4  | 4 | 7.81 | 1 | 3.27E+05  | M25m  | (K)LDLQAI (K)I D V A I V D V L V D G V K L           | mDeacid methionine      | 135.53 | 456.2581 | 1822.018 | -0.0076  | -4.1  | 6.75  | 60126    | 5.44  | HUMAN | ETP94  | Heat shock 70 kDa protein 1A/1B                                              |
| 15167 | dirMS_041712_NAR_120mM_plus.20030.20030.3  | 3 | 7.81 | 1 | 2.47E+05  | M25m  | (R)KJAEU (R)K A E E E U S D W D F R S                | mDeacid methionine      | 164.85 | 504.9216 | 1512.752 | -0.0013  | -0.8  | 4.68  | 72445.7  | 5.07  | HUMAN | PI1021 | 78 kDa glucose-regulated protein                                             |
| 15168 | dirMS_041712_NAR_120mM_plus.6023.6023.3    | 3 | 7.81 | 1 | 5.64E+05  | M25m  | (K)TCESS (K)T C E E U S F C R K                      | mDeacid methionine      | 86.8   | 453.1849 | 1303.541 | -0.0004  | -0.3  | 5.81  | 10576.1  | 11.44 | HUMAN | EP9RF8 | Neutral alpha-glucosidase AB                                                 |
| 15169 | dirMS_041712_NAR_120mM_plus.7980.7980.3    | 3 | 7.81 | 1 | 1.05E+05  | M25m  | (R)GIPAPE (R)I P P A P E E R A R Q                   | mDeacid methionine      | 97.63  | 418.8859 | 1254.644 | -0.0001  | -0.4  | 4.79  | 23092.1  | 6.93  | HUMAN | GV34X8 | Activator of 90 kDa heat shock protein ATPase homolog 1 (Fragment)           |
| 15170 | dirMS_041712_NAR_120mM_plus.16551.16551.2  | 2 | 7.81 | 1 | 4.00E+05  | M427m | (K)HTMKA (K)H T M K A N Q D K                        | mDeacid methionine      | 143.83 | 584.7961 | 1152.589 | 0.0109   | 6     | 10    | 70579.2  | 10.03 | HUMAN | Q6M3C4 | Protein LOC100525155                                                         |
| 15171 | dirMS_041712_NAR_30mM_plus.5754.5754.2     | 2 | 7.81 | 0 | 5.20E+04  | M25m  | (K)AAQAE (K)A Q A E E K H D E K S                    | mDeacid methionine      | 85.57  | 469.2383 | 937.462  | 0.0008   | 7.2   | 4.53  | 39795.8  | 6.08  | HUMAN | Q15149 | Fructose-bisphosphate aldolase                                               |
| 15172 | dirMS_041712_NAR_50mM_plus.17558.17558.3   | 3 | 7.81 | 0 | 2.60E+05  | M25m  | (R)ILLDGA (R)I L L D A P L A I H K A                 | mDeacid methionine      | 168.5  | 458.6218 | 1373.852 | -0.0007  | -0.5  | 6.74  | 14649.8  | 8     | HUMAN | K7EMV7 | Halocidal dehalogenase-like hydrolase domain-containing protein 2 (Fragment) |
| 15173 | dirMS_041712_NAR_50mM_plus.8989.8989.3     | 3 | 7.81 | 1 | 1.31E+05  | M227m | (R)NIXKEF (R)N I X K E F A L V S T P K E I           | mDeacid methionine      | 119.48 | 522.2727 | 1548.812 | 15.9911  | -2.4  | 8.35  | 32616.5  | 5.18  | HUMAN | AN6L76 | Actin, alpha skeletal muscle                                                 |
| 15174 | dirMS_041712_NAR_50mM_plus.9465.9465.3     | 3 | 7.81 | 0 | 1.62E+05  | M329m | (R)SIFSNM (K)S I F N S N G H P L P A S G L A A L N V | mDeacid methionine      | 122.68 | 556.279  | 1605.827 | 15.9956  | -0.4  | 6.47  | 27646.1  | 6.01  | HUMAN | PA9327 | Fatty acid synthase                                                          |
| 15175 | dirMS_041712_NAR_60mM_plus.1466.1466.3     | 3 | 7.81 | 1 | 1.64E+05  | M25m  | (R)IYDQV (R)I Y D Q V I D I K E L E G S K            | mDeacid methionine      | 144.31 | 588.275  | 1370.751 | -0.0001  | -1.3  | 6.47  | 27646.1  | 6.01  | HUMAN | EP80P1 | Enolase                                                                      |
| 15176 | dirMS_041712_NAR_60mM_plus.15740.15740.3   | 3 | 7.81 | 1 | 3.52E+05  | M25m  | (R)NIFGSE (R)N I F G S E L A L E Y K                 | mDeacid methionine      | 148.53 | 514.213  | 1540.801 | -0.0012  | -0.8  | 4.68  | 35548.6  | 4.91  | HUMAN | BADN60 | Parity-associated tRNA ligase, cytoplasmic                                   |
| 15177 | dirMS_041712_NAR_60mM_plus.18009.18009.3   | 3 | 7.81 | 1 | 8.27E+04  | M25m  | (R)IGGGFD (R)I G V D F G F E L S V K L               | mDeacid methionine      | 161.53 | 485.2617 | 1453.769 | 0.002    | 1.4   | 6.07  | 7167.8   | 6.07  | HUMAN | QY95K6 | CD2-associated protein                                                       |
| 15178 | dirMS_041712_NAR_120mM_plus.4674.4674.3    | 3 | 7.81 | 1 | 2.69E+05  | M25m  | (R)IKLSAQ (R)I K L S A Q E L G Q A Q A R A           | mDeacid methionine      | 74.47  | 453.5701 | 1358.702 | -0.0007  | -1.8  | 6.14  | 53377.8  | 5.74  | HUMAN | Q15149 | Plectin                                                                      |
| 15179 | dirMS_041712_NAR_120mM_plus.8058.8058.3    | 3 | 7.81 | 2 | 1.69E+05  | M33m  | (K)ISLTCN (K)I S L T C N D I P A S R S               | mDeacid methionine-mCid | 91.23  | 485.2807 | 1740.83  | 15.9977  | -1.3  | 95.98 | 555.2807 | 16.02 | HUMAN | Q22626 | Heterogeneous nuclear ribonucleoproteins A2/B1                               |
| 15180 | dirMS_041712_NAR_20mM_plus.13316.13316.2   | 2 | 7.81 | 0 | 4.16E+05  | M148m | (R)IDLTVD (R)I D L T V D L Y K K                     | mDeacid methionine      | 164.53 | 507.7439 | 998.486  | 15.9942  | -0.07 | 4.21  | 37482.1  | 5.36  | HUMAN | EP9C30 | Actin, gamma-enteric smooth muscle                                           |
| 15181 | dirMS_041712_NAR_30mM_plus2.10885.10885.2  | 2 | 7.81 | 0 | 5.81E+05  | M25m  | (K)JEAENS (K)J E A E N S L V A Y K                   | mDeacid methionine      | 110.2  | 597.8036 | 1194.6   | -0.0002  | -0.1  | 4.53  | 12926.1  | 4.4   | HUMAN | K7EM20 | 14-3-3 protein epsilon (Fragment)                                            |
| 15182 | dirMS_041712_NAR_30mM_plus2.11301.11301.2  | 2 | 7.81 | 0 | 4.39E+05  | M25m  | (K)ITTDQI (K)I T D Q I D L Y L R L                   | mDeacid methionine      | 112.55 | 469.75   | 938.944  | -0.0014  | -1.5  | 5.5   | 16500    | 9.47  | HUMAN | DBR886 | 40S ribosomal protein S3a                                                    |
| 15183 | dirMS_041712_NAR_30mM_plus2.12835.12835.2  | 2 | 7.81 | 0 | 3.14E+05  | M25m  | (K)IQDQDI (K)I Q D Q I S V Q S I E S E R L           | mDeacid methionine      | 120.75 | 729.3889 | 1457.731 | 0.0006   | 0.4   | 6     | 14855.1  | 9.26  | HUMAN | BLAHD1 | NHP2 non-histone chromosome protein 2-like 1 (S. cerevisiae)                 |
| 15184 | dirMS_041712_NAR_30mM_plus2.16809.16809.2  | 2 | 7.81 | 0 | 4.48E+05  | M25m  | (K)IQIDEM (K)I Q I D E M K L E L A E Q K             | mDeacid methionine      | 140.83 | 573.8112 | 1146.619 | -0.0036  | -1.1  | 6     | 63800.6  | 6.35  | HUMAN | EPH486 | Protein transport protein Sec24                                              |
| 15185 | dirMS_041712_NAR_30mM_plus2.16882.16882.2  | 2 | 7.81 | 0 | 3.72E+05  | M25m  | (K)SNKNU (K)S N K N U Q L V D I E K V                | mDeacid methionine      | 141.28 | 643.8504 | 1286.695 | -0.0055  | -1.2  | 4.37  | 22568.6  | 6.35  | HUMAN | BK3QZ5 | Proteasome activator complex subunit 3                                       |
| 15186 | dirMS_041712_NAR_30mM_plus2.18236.18444.2  | 2 | 7.81 | 0 | 1.64E+04  | M25m  | (R)YNSNIA (K)Y N S N I A L P R                       | mDeacid methionine      | 149.52 | 509.8031 | 1018.604 | -0.0015  | -5.4  | 9.72  | 56564.1  | 6.56  | HUMAN | BADN90 | Aminocyclase-1                                                               |
| 15187 | dirMS_041712_NAR_30mM_plus2.20825.20825.2  | 2 | 7.81 | 0 | 1.89E+05  | M25m  | (K)IGGVGV (K)G I V I E W T A P R A D                 | mDeacid methionine      | 162.95 | 592.6433 | 1184.682 | 0.0013   | 1.1   | 9.75  | 27150.8  | 7.95  | HUMAN | Q9P714 | 3-hydroxyacyl-CoA dehydrogenase Type-2                                       |
| 15188 | dirMS_041712_NAR_40mM_plus2.12870.12870.3  | 3 | 7.81 | 0 | 7.57E+04  | M25m  | (K)KQVVE (K)K Q V V E E P P K V E G A K K            | mDeacid methionine      | 142.2  | 516.8181 | 1681.874 | -0.0002  | -2.1  | 8.75  | 33042.3  | 5.78  | HUMAN | Q796C5 | Hyaluron protein sorting-associated protein 13C                              |
| 15189 | dirMS_041712_NAR_40mM_plus2.7709.7709.2    | 2 | 7.81 | 0 | 1.42E+05  | M25m  | (K)IQAFDE (R)I Q A F D E I P P K V E G A K K         | mDeacid methionine      | 104.62 | 437.1506 | 873.374  | 0.0012   | 0.2   | 4.37  | 22761.5  | 9.91  | HUMAN | EP9V17 | Creatine kinase U-type, mitochondrial (Fragment)                             |
| 15190 | dirMS_041712_NAR_50mM_plus2.11363.11363.3  | 3 | 7.81 | 1 | 1.25E+05  | M25m  | (K)NQVAM (K)N Q V A M R S N T V D K A K L            | mDeacid methionine      | 127.8  | 602.6354 | 1805.896 | -0.0046  | -2.6  | 8.75  | 20069.4  | 5.74  | HUMAN | EP9K54 | Heat shock cognate 71 kDa protein (Fragment)                                 |
| 15191 | dirMS_041712_NAR_50mM_plus2.15009.15009.3  | 3 | 7.81 |   |           |       |                                                      |                         |        |          |          |          |       |       |          |       |       |        |                                                                              |





|       |                                            |   |      |   |                |                                                   |        |          |          |          |       |      |          |             |        |                                                   |
|-------|--------------------------------------------|---|------|---|----------------|---------------------------------------------------|--------|----------|----------|----------|-------|------|----------|-------------|--------|---------------------------------------------------|
| 15365 | dirMS_041712_NAR_60mM_plus.12128.12128.3   | 3 | 7.74 | 0 | 2.92E+05       | (RIQADEFK(R)A D/F E/A/H/N/L I R E)                | 120.55 | 438.558  | 1313.66  | -0.0002  | -0.02 | 5.32 | 66612.6  | 7228 HUMAN  | F8W720 | GMP synthase (glutamyl-hydrolyzing)               |
| 15366 | dirMS_041712_NAR_60mM_plus.18898.18898.3   | 3 | 7.74 | 1 | 1.07E+04       | (KILVYEA(K)LI V/V/E A/E/E/A R V A)                | 156.05 | 489.941  | 1467.821 | -0.0118  | -8.1  | 6.14 | 32355.6  | 9.19 HUMAN  | B4DW26 | Regulator of microtubule dynamics protein 1       |
| 15367 | dirMS_041712_NAR_20mM_plus.14495.14495.3   | 3 | 7.73 | 0 | 1.37E+05       | (KINLSFEA(R)R V/E A/V/S/A V/R/N)                  | 199.57 | 578.992  | 1884.992 | -0.0044  | -2.3  | 4.09 | 26360.7  | 6.22 HUMAN  | E9J104 | Epiplakin                                         |
| 15368 | dirMS_041712_NAR_20mM_minus.14715.14715.2  | 2 | 7.73 | 0 | 1.69E+05       | (KILVYETA(K)N/V A/E/L/L/L/L R R)                  | 201.0  | 593.363  | 1185.72  | -0.0048  | -4.1  | 5.66 | 56167    | 5.47 HUMAN  | B4DU08 | T-complex protein 1 subunit gamma                 |
| 15369 | dirMS_041712_NAR_20mM_minus.7509.7509.2    | 2 | 7.73 | 0 | 1.47E+05 M21m  | (KJATAYEA(K)A/V M/P D/M Q/D Q/D)                  | 122.73 | 390.7864 | 1164.572 | 15.9938  | -1    | 5.88 | 22338.2  | 8.65 HUMAN  | O6B830 | Peroxodoxin-1                                     |
| 15370 | dirMS_041712_NAR_20mM_plus.9581.9581.3     | 3 | 7.73 | 0 | 9.16E+03 M15m  | (RILEGGQR)I E G G G A) D D/L M/P A Q K E)         | 146.8  | 558.2794 | 1656.826 | 15.9955  | 1.5   | 4.03 | 20039.9  | 6.24 HUMAN  | HOY030 | Creatine kinase B-type (Fragment)                 |
| 15371 | dirMS_041712_NAR_20mM_plus.15763.15763.2   | 2 | 7.73 | 0 | 4.68E+04       | (RINDESN(R)R V/L/S/V A/V/R/N)                     | 105.05 | 308.7841 | 1176.558 | 0.0031   | -2.6  | 9.75 | 35061.2  | 5.71 HUMAN  | G5E9P0 | RAD23 homolog 8 (S. cerevisiae), isoform CRA_a    |
| 15372 | dirMS_041712_NAR_30mM_plus.5525.5525.2     | 2 | 7.73 | 0 | 1.77E+05       | (RILVQAGE(R)LI V/Q/V A/G E/R R)                   | 156.05 | 460.366  | 14979.09 | -0.0077  | -6.1  | 6.41 | 20760.7  | 6.33 HUMAN  | GL1385 | Acetyl-CoA carboxylase                            |
| 15373 | dirMS_041712_NAR_30mM_minus.7148.7148.2    | 2 | 7.73 | 1 | 6.94E+04       | (RJIYANARE(R)Y A/N A/D/R/N)                       | 93.02  | 413.2178 | 865.428  | 0.0008   | -1    | 8.75 | 26150.7  | 7.9 HUMAN   | DBR1E5 | RING finger protein 150 (Fragment)                |
| 15374 | dirMS_041712_NAR_30mM_minus.8353.8353.2    | 2 | 7.73 | 0 | 4.65E+05       | (KISFGQSD(R)K S/P/Q/S/L S/R/D)                    | 130.05 | 520.2591 | 1039.517 | -0.0058  | -5.6  | 9.47 | 100478.9 | 5.71 HUMAN  | AM8XP9 | Matrin-3                                          |
| 15375 | dirMS_041712_NAR_30mM_plus.9211.9211.2     | 2 | 7.73 | 0 | 4.87E+05       | (RINQDQF(R)R Q/M/Q/V/Q R/Q R/Q R)                 | 105.05 | 588.7841 | 1176.558 | 0.0031   | -2.6  | 9.75 | 35061.2  | 5.66 HUMAN  | G5E9P0 | RAD23 homolog 8 (S. cerevisiae), isoform CRA_a    |
| 15376 | dirMS_041712_NAR_40mM_plus.11404.11404.3   | 3 | 7.73 | 0 | 7.18E+05       | (RITQVQVQ(R)T Q/V/L E/S/L Q/L N K V)              | 156.05 | 460.366  | 14979.09 | -0.0077  | -6.1  | 6.41 | 20760.7  | 6.33 HUMAN  | GL1385 | Acetyl-CoA carboxylase                            |
| 15377 | dirMS_041712_NAR_40mM_minus.13476.13476.3  | 3 | 7.73 | 0 | 1.27E+04       | (RIDLPSM(R) L P K P S N/L/L/T C/D L K)            | 163.35 | 615.6649 | 1844.979 | 0.0015   | 0.8   | 5.96 | 30925    | 5.63 HUMAN  | BK34R9 | Mitogen-activated protein kinase 3                |
| 15378 | dirMS_041712_NAR_50mM_minus.15423.15423.3  | 3 | 7.73 | 0 | 2.31E+04       | (RJIALLYLQ(R)A L/Y V/LQ/ H/P Q/L R)               | 155.47 | 548.6303 | 1643.89  | -0.0141  | -8.6  | 6.79 | 122967   | 5.33 HUMAN  | FSQV55 | DNA damage-binding protein 1                      |
| 15379 | dirMS_041712_NAR_60mM_minus.10485.10485.3  | 3 | 7.73 | 1 | 1.97E+05 M47m  | (RITLPIAP(R)T L/K V/P A m/T I/A K N)              | 118.38 | 401.5767 | 1186.723 | 15.9928  | -1.8  | 10   | 61224.7  | 5.7 HUMAN   | F1D089 | 60 kDa heat shock protein, mitochondrial          |
| 15380 | dirMS_041712_NAR_60mM_minus.15035.15035.3  | 3 | 7.73 | 0 | 2.96E+05       | (KRWGLDK(R)K W/G L D/S/V G/K V/P R D)             | 143.43 | 452.2463 | 1345.743 | -0.0029  | -2.1  | 8.75 | 44237.3  | 7.81 HUMAN  | ETC0R6 | T-complex protein 1 subunit alpha                 |
| 15381 | dirMS_041712_NAR_60mM_minus.18850.18850.3  | 3 | 7.73 | 1 | 2.67E+05       | (KINAGAM(K)N A/G A/L D L K L E L K N)             | 146.67 | 452.6004 | 1355.789 | -0.0026  | -2    | 6.07 | 13786.8  | 9.33 HUMAN  | B72451 | Transcription elongation factor A protein 1       |
| 15382 | dirMS_041712_NAR_30mM_plus.17292.17292.2   | 2 | 7.73 | 0 | 6.98E+04       | (KJPLVLM(K)W/P L/V/M/S/T K N)                     | 144.88 | 513.2647 | 1025.513 | 0.0097   | 9.4   | 8.59 | 45578.2  | 7.83 HUMAN  | B4DFL2 | Isocitrate dehydrogenase [NADP]                   |
| 15383 | dirMS_041712_NAR_30mM_plus.19634.19725.2   | 2 | 7.73 | 0 | 4.04E+05       | (RJIATGAS(R)R I/T/G/A/S/L/A D I M A R)            | 156.62 | 631.3424 | 1261.682 | -0.0045  | -3.6  | 5.88 | 17656.4  | 11.01 HUMAN | C9JW05 | 60S ribosomal protein L24                         |
| 15384 | dirMS_041712_NAR_30mM_plus.20364.20364.2   | 2 | 7.73 | 0 | 3.12E+05       | (RIFRELAN(R)F E/L I N A/D V/P R I)                | 161.05 | 627.3166 | 1253.616 | -0.0022  | -1.7  | 4.14 | 45508.6  | 5.5 HUMAN   | AK87Q2 | Heat shock cognate 71 kDa protein                 |
| 15385 | dirMS_041712_NAR_30mM_plus.20999.20999.2   | 2 | 7.73 | 0 | 1.61E+05       | (RIGVQVE(R)R V/V/Q/V L/Q/Q A/S R)                 | 164.08 | 505.3632 | 1299.727 | -0.0076  | -5.8  | 6    | 22489.6  | 5.38 HUMAN  | E9P39  | Elongation factor 1-delta (Fragment)              |
| 15386 | dirMS_041712_NAR_50mM_plus.15881.15881.3   | 3 | 7.73 | 1 | 3.70E+06       | (KJSDSEGE(K)D/S/S/A/G F K A N L S L L R R)        | 151.2  | 550.6331 | 1649.886 | -0.001   | -0.5  | 6.07 | 30944.2  | 6.52 HUMAN  | P23246 | Splicing factor, proline- and glutamine-rich      |
| 15387 | dirMS_041712_NAR_50mM_plus.17121.17121.3   | 3 | 7.73 | 0 | 1.12E+05       | (RIGLVAQR(R)R V/L/Q/V Q/A V L H P I I K V)        | 184.93 | 583.336  | 1748.011 | -0.0171  | -9.8  | 6.74 | 58266.4  | 9.46 HUMAN  | B4DND0 | Pyruvate carboxylase, mitochondrial               |
| 15388 | dirMS_041712_NAR_50mM_plus.17609.17609.3   | 3 | 7.73 | 1 | 3.49E+05       | (RIFSGSQA(R)R F L S/G P M/K M/M' D V L A/V L/K H) | 149.75 | 559.2674 | 1675.782 | 0.0008   | 3.5   | 5.96 | 20989.9  | 5.92 HUMAN  | R8W18C | Arcy1-Cdk catalyze kinase                         |
| 15389 | dirMS_041712_NAR_50mM_plus.20102.20102.3   | 3 | 7.73 | 0 | 1.50E+04       | (RIDIKLFK(R)R F/S L K P P L L R R)                | 165.03 | 415.2463 | 1243.741 | -0.0105  | -0.5  | 6.07 | 30944.2  | 6.52 HUMAN  | ELD2N1 | ATP-dependent RNA helicase DDX39A                 |
| 15390 | dirMS_041712_NAR_120mM_minus.10052.10052.3 | 3 | 7.72 | 0 | 5.96E+05       | (RHGESAR(R)R G E/S A/W I N/L E/W R/F)             | 109.4  | 438.208  | 1312.603 | 0.012    | 9.1   | 5.4  | 28917.5  | 6.68 HUMAN  | P18669 | Phosphoglycerate mutase 1                         |
| 15391 | dirMS_041712_NAR_120mM_minus.14137.14137.3 | 3 | 7.72 | 0 | 4.33E+05       | (KRNPTSPS(K)R P T/S V)S I/W/D/G L D/S G L K)      | 130.63 | 544.9369 | 1632.798 | -0.0015  | -0.9  | 5.96 | 2170.5   | 7.02 HUMAN  | PQ0086 | Phosphatidylethanolamine-binding protein 1        |
| 15392 | dirMS_041712_NAR_120mM_minus.6204.6204.3   | 3 | 7.72 | 1 | 1.20E+05       | (KJADQEE(K)Q A Q I/Q/V E Q T R R K)               | 87.68  | 463.2365 | 1387.692 | 0.0025   | 1.8   | 4.79 | 67933    | 6.08 HUMAN  | P26038 | Moesin                                            |
| 15393 | dirMS_041712_NAR_120mM_minus.13798.13798.2 | 2 | 7.72 | 0 | 4.04E+05       | (RIGSLSAN(K)S L G S E L S V L Q/V L R R)          | 188.7  | 670.893  | 1340.731 | 0.0017   | 6.8   | 6.79 | 122967   | 5.33 HUMAN  | FSQV55 | DNA damage-binding protein 1                      |
| 15394 | dirMS_041712_NAR_20mM_plus.14475.14475.3   | 3 | 7.72 | 0 | 2.19E+05       | (KJLAELSK(K) L A A E L S A/T V/Q/L/A/W T/A R V)   | 169.8  | 562.973  | 1686.902 | -0.0027  | -1.6  | 4.53 | 55007.1  | 5.44 HUMAN  | PS0717 | Epiplakin                                         |
| 15395 | dirMS_041712_NAR_20mM_minus.7092.7092.2    | 2 | 7.72 | 0 | 4.77E+05 M28m  | (RJEAESRN(R)R E/A/E A/E S m Y Q I K V)            | 117.9  | 593.2759 | 1169.551 | 15.9938  | -0.9  | 4.75 | 37262.3  | 5.3 HUMAN   | F8VU64 | Keratin, type II cytoskeletal 8                   |
| 15396 | dirMS_041712_NAR_30mM_plus.16765.16765.2   | 2 | 7.72 | 0 | 2.44E+05       | (RIFFMGR(R)F M/G M N V L K V R)                   | 105.05 | 452.2866 | 1081.566 | 0.0004   | 0.3   | 8.53 | 83733.6  | 5.55 HUMAN  | P13010 | X-ray repair cross-complementing protein 5        |
| 15397 | dirMS_041712_NAR_30mM_plus.13827.13827.3   | 3 | 7.72 | 1 | 3.90E+05       | (RIVTSELQ(R)T/T/S/T/S/V L R V L P E C L L R K)    | 163.73 | 437.42   | 1403.121 | 0.0017   | 6.5   | 6.79 | 122967   | 5.33 HUMAN  | EP9D05 | Epiplakin                                         |
| 15398 | dirMS_041712_NAR_50mM_plus.13468.13468.3   | 3 | 7.72 | 1 | 1.31E+05       | (KJSDRLRQ(K)R V R L E Q V I/T/S V/E G T K S)      | 144.68 | 604.3145 | 1810.918 | 0.0108   | 6     | 4.68 | 54214.9  | 5.66 HUMAN  | C9J813 | Valdesin (Fragment)                               |
| 15399 | dirMS_041712_NAR_20mM_plus.11275.11275.2   | 2 | 7.72 | 0 | 1.61E+04       | (RJIQTHIG(R)C V I/T I I/G G D T A T C C A K W)    | 150    | 877.8947 | 1754.787 | -0.0049  | -2.8  | 5.84 | 41827.5  | 7 HUMAN     | B772A9 | Phosphoglycerate kinase                           |
| 15400 | dirMS_041712_NAR_20mM_plus.11519.11519.2   | 2 | 7.72 | 0 | 9.84E+04       | (RJIASLEA(R)R A/S L/V/E/V/Q S L R R)              | 151.82 | 679.8662 | 1358.727 | -0.0023  | -1.7  | 4.53 | 22489.6  | 5.38 HUMAN  | E9P39  | Elongation factor 1-delta (Fragment)              |
| 15401 | dirMS_041712_NAR_20mM_plus.12792.12792.2   | 2 | 7.72 | 0 | 3.16E+05       | (KJLSLEAK(R)S V/L/E/A/L L R R)                    | 161.53 | 565.312  | 1129.621 | -0.002   | -1.8  | 4.53 | 56607.4  | 5.37 HUMAN  | R8V046 | Keratin, type II cytoskeletal 8                   |
| 15402 | dirMS_041712_NAR_20mM_plus.13842.13842.2   | 2 | 7.72 | 0 | 4.62E+04       | (RIVYQAL(R)R V I/V D/L/S G L R R)                 | 167.37 | 500.8034 | 1000.604 | -0.0042  | -0.2  | 5.81 | 26949.2  | 6.99 HUMAN  | C9J5C3 | Creatine kinase Li-type, mitochondrial (Fragment) |
| 15403 | dirMS_041712_NAR_20mM_plus.18128.18128.3   | 3 | 7.72 | 0 | 2.29E+03       | (RDISLTEM(R)S L T E I N L S A/V/L G R V)          | 126.5  | 530.2925 | 1588.854 | 0.0089   | 5.6   | 4.37 | 151198.9 | 9.46 HUMAN  | Q8NWS5 | Isoform 2 of lysine-specific demethylase 2B       |
| 15404 | dirMS_041712_NAR_20mM_plus.8390.8390.2     | 2 | 7.72 | 0 | 1.06E+05       | (KJITAVCD(R)K A I/V C/D/P R P R K)                | 195.63 | 514.7664 | 1028.519 | 0.0062   | 6     | 5.5  | 50199.4  | 4.75 HUMAN  | ABNNZ2 | Tubulin beta-8 chain-like protein LOC260334       |
| 15405 | dirMS_041712_NAR_30mM_plus.10446.10446.2   | 2 | 7.72 | 0 | 5.36E+05       | (KJITAVCD(R)K A I/V C/D/P R P R K)                | 108.98 | 514.7643 | 1028.519 | 0.002    | 1.9   | 5.5  | 50199.4  | 4.75 HUMAN  | ABNNZ2 | Tubulin beta-8 chain-like protein LOC260334       |
| 15406 | dirMS_041712_NAR_30mM_plus.12971.12971.3   | 3 | 7.72 | 0 | 3.89E+05       | (KJSDPSPS(K)S T/S/T/P/S P G R P T R)              | 84.53  | 544.2682 | 1037.538 | -0.0087  | -8    | 9.47 | 41818.8  | 8.76 HUMAN  | H3BR80 | Ataxin-2-like protein (Fragment)                  |
| 15407 | dirMS_041712_NAR_30mM_plus.22297.22297.2   | 2 | 7.72 | 0 | 3.01E+05       | (KJCMPTFK(K)M P/T/P/G F R F K K)                  | 172.77 | 603.2777 | 1205.548 | -0.0001  | -1    | 7.15 | 9680     | 5.77 HUMAN  | E1A1W1 | Thioredoxin                                       |
| 15408 | dirMS_041712_NAR_30mM_plus.5801.5801.2     | 2 | 7.72 | 0 | 2.82E+04       | (KJSTSTPTS(K)S T/S/T/P/S P G R P T R)             | 84.53  | 544.2682 | 1037.538 | -0.0087  | -8    | 9.47 | 41818.8  | 8.76 HUMAN  | H3BR80 | Ataxin-2-like protein (Fragment)                  |
| 15409 | dirMS_041712_NAR_40mM_plus.6039.6039.2     | 2 | 7.72 | 0 | 2.48E+05       | (RJIOMGAN(R)M I/A N L V/E R R K)                  | 94.25  | 425.7221 | 904.431  | 0.0064   | 7.1   | 5.75 | 77799.7  | 9.09 HUMAN  | PS2272 | Heterogenous nuclear ribonucleoprotein M          |
| 15410 | dirMS_041712_NAR_40mM_plus.6196.6196.2     | 2 | 7.72 | 1 | 3.84E+05       | (RJIYSQGN(R)S I/G E A/V/Y D R V D N L R)          | 95.58  | 719.2857 | 1437.567 | -0.002   | -1.7  | 4.1  | 12170.1  | 8.86 HUMAN  | P98179 | Purative RNA-binding protein 3                    |
| 15411 | dirMS_041712_NAR_50mM_plus.13565.13755.3   | 3 | 7.72 | 1 | 2.00E+06 M320m | (RJIYMACZ(K)S V/H/A C L L Y R S I/V/P R/I E)      | 140.55 | 620.9622 | 1844.886 | 15.9865  | -4.5  | 8.49 | 50706.6  | 5.68 HUMAN  | AKNHL4 | Tubulin alpha chain-3                             |
| 15412 | dirMS_041712_NAR_50mM_plus.6209.6209.3     | 3 | 7.72 | 0 | 4.48E+04 M437m | (RJIJESGCR(K)E I/S G M Q/N S I N H/T M K)         | 97.02  | 497.9026 | 1475.698 | 15.9951  | 0.1   | 7.15 | 56607.4  | 5.37 HUMAN  | F8V046 | Keratin, type II cytoskeletal 8                   |
| 15413 | dirMS_041712_NAR_50mM_plus.7229.7229.3     | 3 | 7.72 | 1 | 7.50E+04       | (KJIDSTYR(K)D I/S T M/H Y S A Q K T K)            | 103.52 | 473.2382 | 1417.696 | 0.0043   | 3     | 8.43 | 17045.4  | 4.25 HUMAN  | HOYD0  | Endoplasmic reticulum 1M                          |
| 15414 | dirMS_041712_NAR_50mM_plus.10645.11448.3   | 3 | 7.72 | 1 | 3.77E+07 S306s | (RJIHDHMS(R)R H/H M S/G W/L Y/R R V E K S)        | 114.98 | 654.9726 | 1759.833 | 20.01699 | -4.8  | 8.51 | 51648.4  | 5.55 HUMAN  | B7K008 | Protein phosphatase 1M                            |
| 15415 | dirMS_041712_NAR_60mM_plus.14767.14767.3   | 3 | 7.72 | 1 | 3.86E+05       | (RJIKEFEM(R)R V/L S/V L Q/V L R R)                | 150.33 | 675.758  | 1460.728 | -0.05    | -0.5  | 6.07 | 30944.2  | 6.52 HUMAN  | E9P369 | 25S protease regulatory subunit 6A                |
| 15416 | dirMS_041712_NAR_60mM_plus.17722.17722.3   | 3 | 7.72 | 0 | 4.55E+05       | (RJIWFAFF(R)R D/A S F/F/G V H P R K)              | 149.22 | 417.8778 | 1251.616 | 0.0032   | 2.5   | 6.74 | 276046.1 | 6.03 HUMAN  | PA9327 | Fatty acid synthase                               |
| 15417 | dirMS_041712_NAR_60mM_plus.20289.20289.3   | 3 | 7.72 | 1 | 4.21E+05       | (KJNAAAG(K)A I/A/G A/L D L K L E L K N)           | 166.93 | 452.6004 | 1355.789 | -0.0026  | -2    | 6.07 | 13786.8  | 9.33 HUMAN  | B72451 | Transcription elongation factor A protein 1       |
| 15418 | dirMS_041712_NAR_20mM_minus.13047.13047.2  | 2 | 7.71 | 0 | 9.05E+05 M35m  | (RJIALVDE(R)R A/V I/V D/L/E/P Q/T D S/P R K)      | 182.55 | 516.4184 | 1615.836 | 15.9935  | -0.8  | 4.03 | 27549.9  | 4.39 HUMAN  | EP8B14 | Tubulin beta chain                                |
| 15419 | dirMS_041712_NAR_20mM_minus.5641.5641.2    | 2 | 7.71 | 0 | 3.33E+05       | (RJIQDSTY(R)R V/L S/V L Q/V L R R)                | 147.47 | 512.861  | 1425.611 | -0.0042  | -2.4  | 9.75 | 50499.4  | 9.03 HUMAN  | K7EM20 | Elongation factor 1-alpha 1                       |
| 15420 | dirMS_041712_NAR_20mM_plus.10518.10518.3   | 3 | 7.71 | 0 | 2.90E+05 M37m  | (RJIYAGAM(K)A A/S D/V/A M T/A/L P/T D S/P R I R)  | 127.9  | 612.6486 | 1819.937 | 15.9942  | 0.4   | 5.32 | 12926.1  | 4.4 HUMAN   | K7EM20 | 14-3-3 protein epsilon (Fragment)                 |
| 15421 | dirMS_041712_NAR_20mM_minus.10924.10924.3  |   |      |   |                |                                                   |        |          |          |          |       |      |          |             |        |                                                   |



|       |                                            |   |      |                 |                                                      |         |          |          |         |       |      |          |       |       |        |                                                                                   |
|-------|--------------------------------------------|---|------|-----------------|------------------------------------------------------|---------|----------|----------|---------|-------|------|----------|-------|-------|--------|-----------------------------------------------------------------------------------|
| 15583 | dirMS_041712_NAR_30mM_minus.5392.5392.2    | 2 | 7.63 | 0.470E+05       | (R)ITDTEP(R)T D I T G / E P M G R(G)                 | 82.77   | 482.2145 | 963.42   | 0.0017  | 1.8   | 4.37 | 85057.6  | 4.94  | HUMAN | P07900 | Heat shock protein HSP 90-alpha                                                   |
| 15584 | dirMS_041712_NAR_40mM_minus.15854.15854.3  | 3 | 7.63 | 0.544E+05       | (K)GLADP(K)G L I A P / D L F V Q L Y H L K I(K)      | 184.77  | 565.3111 | 16931.96 | -0.0028 | -1.7  | 4.54 | 16789.5  | 10.63 | HUMAN | JM3K05 | 40S ribosomal protein S13                                                         |
| 15585 | dirMS_041712_NAR_50mM_minus.1629.1629.2    | 2 | 7.63 | 1.112E+05       | (K)DNDK(K)R A D S / L A V V A V N(R)                 | 165.62  | 458.2889 | 912.551  | -0.0041 | -0.7  | 6.07 | 29788.1  | 5.38  | HUMAN | AB0456 | Regulator of chromosomere condensation (Fragment)                                 |
| 15586 | dirMS_041712_NAR_60mM_minus.15241.15241.3  | 3 | 7.63 | 1.094E+06       | (K)HMDP(K)R L I A G / L A L C V I L A Q T V K(D)     | 177.22  | 518.9484 | 1554.831 | -0.0002 | -0.1  | 6.46 | 52024.9  | 6.01  | HUMAN | FG5W05 | T-complex protein 1 subunit beta                                                  |
| 15587 | dirMS_041712_NAR_120mM_plus.7968.7968.4    | 4 | 7.63 | 2.714E+05 M33m  | (K)LDCCV(K)I T D C V V / M R D / P A S R(R)          | 95.93   | 416.712  | 1647.831 | -0.0011 | 0.4   | 8.75 | 37486.1  | 9.03  | HUMAN | P22626 | Heterogeneous nuclear ribonucleoproteins A2/B1                                    |
| 15588 | dirMS_041712_NAR_20mM_plus.10766.10766.2   | 2 | 7.63 | 0.118E+05       | (R)IAGTVE(R)A G / T G V N D V D / E A A T R(K)       | 146.88  | 744.8731 | 1488.729 | -0.001  | 6.7   | 4.03 | 57391.2  | 6.29  | HUMAN | DA3175 | D-3-phosphoglycerate dehydrogenase                                                |
| 15589 | dirMS_041712_NAR_20mM_plus.13500.13500.2   | 2 | 7.63 | 0.632E+04       | (K)ADSLA(K)I D S / L A V V A V N(R)                  | 165.62  | 458.2889 | 912.551  | -0.0041 | -0.7  | 5.88 | 10339.5  | 5.38  | HUMAN | AB0456 | SARS protein                                                                      |
| 15590 | dirMS_041712_NAR_20mM_plus.15136.15136.2   | 2 | 7.63 | 0.188E+05 M68m  | (K)SANT(K)K A S H G T N F J A S A H M G A K M(K)     | 176.33  | 792.3469 | 1567.71  | -0.0011 | -11.9 | 8.51 | 114235.3 | 6.69  | HUMAN | P23378 | Glycine dehydrogenase [decarboxylating], mitochondrial                            |
| 15591 | dirMS_041712_NAR_20mM_plus.15515.15515.2   | 2 | 7.63 | 1.87E+05 M33m   | (R)HFAEFC(R)R F A / E I P S D R S R(R)               | 177.33  | 792.3469 | 1567.71  | -0.0011 | -7.6  | 4.68 | 14931.6  | 9.75  | HUMAN | C3X0Y5 | Sentan                                                                            |
| 15592 | dirMS_041712_NAR_20mM_plus.6740.6740.2     | 2 | 7.63 | 0.424E+04       | (R)IVJSEG(R)R V / I S / V / E / K(T)                 | 111.22  | 452.2607 | 903.515  | -0.0004 | -0.5  | 5.97 | 18789.1  | 6.77  | HUMAN | A2I0B2 | 14-3-3 protein eta (Fragment)                                                     |
| 15593 | dirMS_041712_NAR_20mM_plus.7389.7389.2     | 2 | 7.63 | 0.270E+05 M281m | (R)IAEAS(R)R E A / I A S M S P H Q I K(Y)            | 118.85  | 593.2759 | 1169.551 | -0.0038 | -0.9  | 4.53 | 32796.3  | 5.3   | HUMAN | FBV064 | Keratin, type II cytoskeletal B1                                                  |
| 15594 | dirMS_041712_NAR_30mM_plus.8948.8948.2     | 2 | 7.63 | 7.09E+05        | (R)IGDQ(K)R M G / G V T P A G Q G R(G)               | 166.07  | 466.1002 | 1120.5   | -0.0037 | -1.3  | 8.75 | 70367.2  | 9.14  | HUMAN | P31246 | Splicing factor, proline- and glutamine-rich                                      |
| 15595 | dirMS_041712_NAR_50mM_plus.10941.10941.3   | 3 | 7.63 | 0.368E+04       | (K)MVMY(K)M / M Y M Q / Q G / P K E D A G K P L(R)   | 125.3   | 657.663  | 1970.979 | -0.0042 | -2.1  | 5.71 | 70034.8  | 6.89  | HUMAN | BD4731 | Far upstream element-binding protein 1                                            |
| 15596 | dirMS_041712_NAR_50mM_plus.16388.16388.3   | 3 | 7.63 | 1.122E+05       | (R)IEGVTAR(I)R G I / V T A T E E / V K E D A I K(L)  | 154.68  | 620.658  | 1859.96  | -0.0002 | -0.1  | 4.25 | 74494.3  | 1.78  | HUMAN | F5H897 | Heat shock protein 75 kDa, mitochondrial                                          |
| 15597 | dirMS_041712_NAR_50mM_plus.19005.19005.3   | 3 | 7.63 | 0.547E+05       | (R)IGGFTT(R)F G F I / V T T M P E / H A S V A M R(K) | 168.65  | 661.3258 | 1981.959 | -0.004  | -2    | 6.75 | 13701.1  | 8.86  | HUMAN | PR8179 | Putative RNA-binding protein 3                                                    |
| 15598 | dirMS_041712_NAR_50mM_plus.20796.20796.3   | 3 | 7.63 | 1.435E+05       | (R)ITSEAD(R)I T S / E A E D I V A W F F P K K(L)     | 178     | 603.655  | 1986.943 | -0.0049 | -2.7  | 4.68 | 14931.6  | 5.53  | HUMAN | BT2003 | Proteasome activator complex subunit 3                                            |
| 15599 | dirMS_041712_NAR_60mM_plus.17629.17629.3   | 3 | 7.63 | 1.117E+05       | (K)SIVSGR(K)S / Y S R P D E I R F T L K(Y)           | 148.95  | 591.9669 | 1773.881 | -0.0055 | -3.1  | 5.79 | 17888.9  | 8.87  | HUMAN | HOY548 | Peptidyl-prolyl cis-trans isomerase (Fragment)                                    |
| 15600 | dirMS_041712_NAR_60mM_plus.18932.18932.3   | 3 | 7.63 | 1.262E+05       | (K)YGLKEV(K)Y G K L E / V A I N L L Q K(S)           | 156.68  | 496.9628 | 1488.778 | -0.0046 | -3.1  | 8.5  | 482683.6 | 6.07  | HUMAN | Q12955 | Ankyrin-3                                                                         |
| 15601 | dirMS_041712_NAR_60mM_plus.6579.6579.3     | 3 | 7.63 | 0.703E+05       | (K)YLDQSQ(K)I V / Q G S / P P M R E P K(F)           | 93.72   | 425.2257 | 1303.664 | -0.0015 | -1.2  | 5.32 | 142137.6 | 19.17 | HUMAN | F7ENU4 | Double-stranded RNA-specific adenosine deaminase                                  |
| 15602 | dirMS_041712_NAR_120mM_minus.11801.1200.2  | 2 | 7.62 | 0.149E+05       | (K)HMAFT(K)M V / L I P T V L R(M)                    | 115.38  | 483.7804 | 966.555  | -0.0018 | -1.9  | 9.75 | 57818.1  | 5.5   | HUMAN | E9P9B8 | Serine/threonine-protein phosphatase 2A 65 kDa regulatory subunit A alpha isoform |
| 15603 | dirMS_041712_NAR_30mM_minus.5505.5505.2    | 2 | 7.62 | 0.898E+05 M138m | (R)IJDMD(R)I L M / D L N V L K(C)                    | 84.75   | 439.2266 | 861.45   | -0.0061 | -1.3  | 5.84 | 26611.3  | 4.47  | HUMAN | AKN128 | Putative tropomyosin alpha-3 chain-like protein                                   |
| 15604 | dirMS_041712_NAR_40mM_minus.6274.6274.3    | 3 | 7.62 | 0.291E+04       | (K)ASGGQ(K)A S G G D G A / A S S A G / A K(R)        | 102.57  | 435.8693 | 1305.603 | -0.0096 | -7.4  | 5.88 | 25666.6  | 6.03  | HUMAN | Q60287 | Nucleolar pre-ribosomal-associated protein                                        |
| 15605 | dirMS_041712_NAR_50mM_minus.10745.10745.3  | 3 | 7.62 | 0.268E+05       | (K)YVFEG(K)Y V / I E G N R P T S / I V F T K(L)      | 129.25  | 570.3203 | 1708.902 | -0.0066 | -3.9  | 8.72 | 63374.2  | 8.64  | HUMAN | P06774 | Glycose-6-phosphate isomerase                                                     |
| 15606 | dirMS_041712_NAR_50mM_minus.16908.16908.3  | 3 | 7.62 | 1.231E+05       | (K)SLDKR(K)K S / G T R K D / V D L F L I(K)          | 164.22  | 411.5911 | 1232.761 | -0.0025 | -2.1  | 8.31 | 41827.5  | 7     | HUMAN | Z797A9 | Phosphoglycerate kinase                                                           |
| 15607 | dirMS_041712_NAR_50mM_minus.884.884.3      | 3 | 7.62 | 1.004E+05 M477m | (R)IIMDAR(R)T L R / P A T I A K(K)                   | 118.22  | 401.5779 | 1186.723 | -0.0064 | -1.2  | 10   | 63242.7  | 10    | HUMAN | P6024  | 60 kDa heat shock protein, mitochondrial                                          |
| 15608 | dirMS_041712_NAR_60mM_minus.12076.12076.3  | 3 | 7.62 | 1.215E+05       | (K)YVDFEE(K)Y A / I D E L P / R S P F K I(V)         | 127.3   | 484.5732 | 1451.717 | -0.0115 | -7.8  | 4.68 | 258215.9 | 5.48  | HUMAN | F7EN95 | Flamin-B                                                                          |
| 15609 | dirMS_041712_NAR_60mM_minus.17586.17586.3  | 3 | 7.62 | 0.770E+04       | (R)YVAFV(R)S / V F A / V M D G / H G I R(A)          | 157.88  | 508.9291 | 1524.759 | -0.0134 | -8.9  | 6.71 | 23205.7  | 5.89  | HUMAN | EPG0C5 | Integrin-linked kinase-associated serine/threonine phosphatase 2C (Fragment)      |
| 15610 | dirMS_041712_NAR_120mM_plus.5727.5572.3    | 3 | 7.62 | 1.762E+04       | (R)YGEDNE(R)Y / G I E / D N H G V G G S D G R G R(G) | 82.97   | 543.9055 | 1629.7   | -0.0019 | -1.2  | 6.07 | 26157.9  | 4.57  | HUMAN | Z7E185 | TATA-binding protein-associated factor 2N (Fragment)                              |
| 15611 | dirMS_041712_NAR_20mM_plus.12572.12572.2   | 2 | 7.62 | 0.934E+05 M91m  | (K)YVAFV(R)S / V F A / V M D G / H G I R(A)          | 157.88  | 508.9291 | 1524.759 | -0.0134 | -8.9  | 6.71 | 23205.7  | 5.89  | HUMAN | EPG0C5 | 60S ribosomal protein L23                                                         |
| 15612 | dirMS_041712_NAR_20mM_plus.14671.14671.2   | 2 | 7.62 | 0.806E+04       | (K)NLYSV(K)M L / Y S V S K(Y)                        | 171.93  | 475.2896 | 945.972  | -0.0002 | -0.2  | 8.59 | 12270.4  | 11.49 | HUMAN | B9Z97P | 60S ribosomal protein L23                                                         |
| 15613 | dirMS_041712_NAR_30mM_plus.10844.10844.2   | 2 | 7.62 | 0.119E+06       | (R)IGLTSV(R)R L T / S / V / N / Q K(L)               | 110.87  | 480.2885 | 959.552  | -0.0023 | -2.4  | 8.75 | 36923.1  | 5.71  | HUMAN | PH0195 | L-lactate dehydrogenase B chain                                                   |
| 15614 | dirMS_041712_NAR_30mM_plus.21400.21400.2   | 2 | 7.62 | 0.272E+05       | (R)EADNV(R)R A D D / V / N / M / L K(L)              | 107.427 | 601.81   | 1202.605 | -0.0075 | -6.3  | 4.03 | 26363.4  | 4.91  | HUMAN | BL3132 | Protein disulfide-isomerase (Fragment)                                            |
| 15615 | dirMS_041712_NAR_30mM_plus.22187.22187.2   | 2 | 7.62 | 0.257E+05 M77m  | (K)ADPFT(K)R S / G T S / G D F / F R(K)              | 172.67  | 427.2777 | 1295.541 | -0.0051 | -0.1  | 8.75 | 36068    | 10.41 | HUMAN | AB0456 | SARS protein                                                                      |
| 15616 | dirMS_041712_NAR_30mM_plus.4888.4888.2     | 2 | 7.62 | 0.537E+05 M571m | (R)HMGANS(R)K / A M S / L A E R(K)                   | 76.88   | 447.2119 | 877.42   | -0.0069 | -2.2  | 5.75 | 77999.7  | 9.09  | HUMAN | PS2272 | Heterogeneous nuclear ribonucleoprotein M                                         |
| 15617 | dirMS_041712_NAR_30mM_plus.8118.8118.2     | 2 | 7.62 | 0.203E+05       | (R)ITGGAT(R)T Q / A / E E / V E R(A)                 | 96.55   | 530.2783 | 1059.543 | -0.0064 | -6    | 4.53 | 53377.8  | 5.74  | HUMAN | Q15149 | Plectin                                                                           |
| 15618 | dirMS_041712_NAR_50mM_plus.14778.14778.3   | 3 | 7.62 | 0.117E+06       | (R)IEHALLA(R)H A / L L A / I T / G V / K(I)          | 105.45  | 438.9176 | 1314.742 | -0.0034 | -2.6  | 6.85 | 50022.8  | 9.31  | HUMAN | PE8104 | Uncoupling factor 1-alpha 1                                                       |
| 15619 | dirMS_041712_NAR_120mM_minus.13082.13082.4 | 4 | 7.61 | 0.488E+05       | (K)RHEKTR(K)S / G T R P P H F A / I A Q R(K)         | 125.17  | 402.9764 | 1688.886 | -0.0019 | -1.2  | 8.49 | 15002.8  | 9.1   | HUMAN | F7EW20 | Evolutionary conserved myosin-V                                                   |
| 15620 | dirMS_041712_NAR_120mM_minus.14886.14886.4 | 4 | 7.61 | 1.58E+05        | (R)IDGK(R)K E L A D G C H L A / V A I V S R(K)       | 135.32  | 422.282  | 1645.981 | -0.0011 | -6.1  | 8.75 | 55361.8  | 6.42  | HUMAN | FG6452 | Protein disulfide-isomerase family A, member 3, isoform CRA_b                     |
| 15621 | dirMS_041712_NAR_120mM_minus.8684.8684.3   | 3 | 7.61 | 1.290E+05       | (R)IGNSYF(R)R S / V F R E / E / K(Y)                 | 101.85  | 405.54   | 1214.605 | -0.0003 | -0.2  | 6.14 | 60044.6  | 6.4   | HUMAN | F5H071 | Stress-induced-phosphoprotein 1                                                   |
| 15622 | dirMS_041712_NAR_120mM_minus.8803.8803.3   | 3 | 7.61 | 0.272E+05       | (R)PRLDEE(R)R P / V L E U D / S T R(K)               | 102.42  | 405.8796 | 1215.633 | -0.0085 | -7    | 4.68 | 81007.1  | 6.31  | HUMAN | EPN0V1 | Plectin (Fragment)                                                                |
| 15623 | dirMS_041712_NAR_30mM_minus.9572.9572.2    | 2 | 7.61 | 0.509E+05       | (K)SVLEDE(K)S V / E L D / D V(K)                     | 106.12  | 459.7452 | 918.478  | -0.0053 | -5.7  | 4.14 | 40310.4  | 6.69  | HUMAN | BD40G7 | AP-1 complex subunit mu-1                                                         |
| 15624 | dirMS_041712_NAR_50mM_minus.12862.12862.3  | 3 | 7.61 | 2.33E+05        | (R)IADG(R)K A / A G A / L / I G L M V L R(L)         | 140.57  | 541.2467 | 1621.911 | -0.0051 | -1.1  | 8.75 | 11971.7  | 6.15  | HUMAN | AB0456 | Heat shock protein 71 kDa protein (Fragment)                                      |
| 15625 | dirMS_041712_NAR_60mM_minus.11506.11506.3  | 3 | 7.61 | 1.131E+05       | (R)IADG(R)R S / D F R A M A M V A R(A)               | 124.22  | 418.2174 | 1252.635 | -0.0022 | -1.8  | 5.96 | 35556.4  | 9.3   | HUMAN | FZ2953 | Transaldolase                                                                     |
| 15626 | dirMS_041712_NAR_60mM_minus.17220.17220.3  | 3 | 7.61 | 1.112E+05       | (K)FLSPQD(K)K L / S / P / D T F E L A K R(N)         | 156.22  | 517.9425 | 1551.817 | -0.0036 | -2.3  | 6.07 | 97622    | 9.34  | HUMAN | Q9NT26 | RNA-binding protein 12                                                            |
| 15627 | dirMS_041712_NAR_60mM_minus.18813.18813.3  | 3 | 7.61 | 1.267E+05       | (K)NAGAA(K)N A / I A G / L D L K L E K(N)            | 166.87  | 452.6004 | 1355.789 | -0.0026 | -2    | 6.07 | 13786.8  | 8.93  | HUMAN | B72451 | Transcription elongation factor A protein 1                                       |
| 15628 | dirMS_041712_NAR_120mM_plus.6261.6261.2    | 2 | 7.61 | 3.49E+05        | (K)DSDYD(K)R S / V S G D F A S R(K)                  | 96.28   | 577.815  | 1527.843 | -0.0026 | -0.5  | 5.46 | 32615.6  | 5.18  | HUMAN | AB0456 | Actin, alpha skeletal muscle                                                      |
| 15629 | dirMS_041712_NAR_120mM_plus.7245.7245.3    | 3 | 7.61 | 1.231E+06       | (R)EMQLQ(K)E M / Q / L R / E E Y R(R)                | 91.67   | 449.8829 | 1347.632 | -0.002  | -1.5  | 4.49 | 26419.2  | 5.1   | HUMAN | HOY9K7 | Splicing factor, proline- and glutamine-rich (Fragment)                           |
| 15630 | dirMS_041712_NAR_120mM_plus.9421.9488.3    | 3 | 7.61 | 1.652E+05       | (R)ISGNV(K)R G S K L / V I I I E / A E R(S)          | 102.85  | 448.9084 | 1344.712 | -0.0011 | -0.8  | 4.79 | 42755    | 7.81  | HUMAN | B727F4 | T-complex protein 1 subunit delta                                                 |
| 15631 | dirMS_041712_NAR_20mM_plus.12094.12094.2   | 2 | 7.61 | 0.120E+05       | (R)IYVDFE(R)Y / V V A D D / V S P R(K)               | 161.87  | 617.3237 | 1233.647 | -0.0098 | -5.9  | 4.37 | 39066    | 6.61  | HUMAN | AP6VW9 | Selenium binding protein 1 (Fragment)                                             |
| 15632 | dirMS_041712_NAR_20mM_plus.13092.13092.2   | 2 | 7.61 | 0.225E+05 M316m | (R)ISQFTAR(R)S / I Q / V / T / A M F R(R)            | 163.87  | 623.3012 | 1292.598 | -0.0078 | -1.5  | 6    | 42831.5  | 4.86  | HUMAN | ABK454 | HCG198304, isoform CRA_f                                                          |
| 15633 | dirMS_041712_NAR_20mM_plus.16675.16675.3   | 3 | 7.61 | 0.239E+05       | (K)YVDAV(K)Q L I A / V A N A / G I V R Q(M)          | 166.48  | 518.2975 | 1552.88  | -0.0026 | -1.7  | 5.97 | 20788.1  | 6.46  | HUMAN | AB0456 | Mitochondrial import inner membrane translocase subunit Tim13                     |
| 15634 | dirMS_041712_NAR_20mM_plus.17              |   |      |                 |                                                      |         |          |          |         |       |      |          |       |       |        |                                                                                   |

|       |                                            |   |      |   |                |                                                  |        |          |          |          |       |          |            |             |                           |                                                                             |
|-------|--------------------------------------------|---|------|---|----------------|--------------------------------------------------|--------|----------|----------|----------|-------|----------|------------|-------------|---------------------------|-----------------------------------------------------------------------------|
| 15692 | dirMS_041712_NAR_60mM_minus.6004.6043.3    | 3 | 7.58 | 1 | 2.64E+06       | (KIDSVGG)(K)S/V/V/G/E/A/Q/S/K(R)                 | 90.58  | 452.2129 | 1354.623 | 0.0008   | 0.6   | 4.56     | 32616.5    | 5.18 HUMAN  | ANL76                     | Actin, alpha skeletal muscle                                                |
| 15693 | dirMS_041712_NAR_60mM_minus.6665.6665.3    | 3 | 7.58 | 1 | 2.14E+05       | (KIDIDFR)(K)D/D/I/K/K/P/G/E/E(F)                 | 96.35  | 463.2294 | 1387.67  | 0.0037   | 2.7   | 4.37     | 49982      | 5.86 HUMAN  | BAD7DB                    | T-complex protein 1 subunit epsilon                                         |
| 15694 | dirMS_041712_NAR_120mM_plus.8617.8617.2    | 3 | 7.58 | 0 | 7.31E+05       | (KIDHVALS)(K)I/V/L/V/A/S/E                       | 90.95  | 469.8173 | 1374.57  | 0.0074   | 5.9   | 6.73     | 43774.2    | 5.86 HUMAN  | K21454                    | Glucose-6-phosphatase isomerase                                             |
| 15695 | dirMS_041712_NAR_20mM_plus.12998.12998.2   | 2 | 7.58 | 0 | 2.94E+05 M316m | (KIDIDOPK)(R)I/S/Q/F/T/M/S/R                     | 116.62 | 623.3012 | 1229.598 | 0.15     | 5.6   | 4.2831.5 | 4.86 HUMAN | AK854       | HCG1983504, isoform CRA_f |                                                                             |
| 15696 | dirMS_041712_NAR_20mM_plus.18842.18842.3   | 3 | 7.58 | 0 | 1.25E+05       | (KIVYDMD)(K)Y/V/D/G/L/U/S/L/Q/K/Q(K)             | 200.67 | 488.2764 | 1462.815 | -0.0005  | -0.4  | 4.21     | 30947.9    | 6.47 HUMAN  | H83Q34                    | Pyruvate                                                                    |
| 15697 | dirMS_041712_NAR_20mM_plus.9645.9645.2     | 2 | 7.58 | 0 | 6.10E+04       | (KITLYSA)(K)I/T/L/V/S/A/A/P/R(K)                 | 137.97 | 478.793  | 956.577  | 0.0012   | 1.3   | 8.75     | 12480.3    | 9.05 HUMAN  | F5H24                     | Acyl-coenzyme A thioesterase 13                                             |
| 15698 | dirMS_041712_NAR_30mM_plus.17987.17987.2   | 2 | 7.58 | 0 | 2.68E+05       | (KIDFEDN)(K)I/E/D/E/N/F/L/K(H)                   | 102.62 | 508.791  | 1154.573 | 0.0007   | 0.2   | 4.64     | 13378.8    | 6.27 HUMAN  | CUS29                     | Phosphoryl-co-transferase                                                   |
| 15699 | dirMS_041712_NAR_30mM_plus.8423.8423.2     | 2 | 7.58 | 0 | 7.55E+04       | (KIDGGGG)(K)I/G/G/G/G/G/G/G/V/P(G E I R M)       | 96.87  | 642.8178 | 1284.629 | -0.0008  | -0.6  | 6        | 77995.7    | 9.09 HUMAN  | PS2272                    | Heterogeneous nuclear ribonucleoprotein M                                   |
| 15700 | dirMS_041712_NAR_50mM_plus.10292.10920.3   | 3 | 7.58 | 1 | 7.66E+05       | (RJDSTNK)(R)I(S)T/N/K V/E/V/P(Y G E R I)         | 124.17 | 583.6304 | 1748.881 | -0.0047  | -2.7  | 4.68     | 160853.1   | 6.11 HUMAN  | F8VU51                    | YLP motif-containing protein 1                                              |
| 15701 | dirMS_041712_NAR_50mM_plus.10983.10983.3   | 3 | 7.58 | 1 | 2.48E+05       | (KIVYGAG)(R)I/G/G/Q/G/Q/G/E/V/V/V/K(H)           | 125.47 | 497.9426 | 1491.817 | -0.0033  | -2.2  | 6.07     | 28815.3    | 9.52 HUMAN  | BA42X                     | Cold-inducible RNA-binding protein                                          |
| 15702 | dirMS_041712_NAR_50mM_plus.19701.19701.3   | 3 | 7.58 | 1 | 1.38E+05       | (RIVAKLE)(R)I/V/A/K/K/E/V/A/V(D)I/A/K(E)         | 171.43 | 384.3588 | 1751.068 | -0.0119  | -6.8  | 6.04     | 24273.5    | 8.98 HUMAN  | HGV49                     | Electron transfer flavin protein subunit alpha, mitochondrial               |
| 15703 | dirMS_041712_NAR_50mM_plus.21111.21111.3   | 3 | 7.58 | 0 | 3.42E+06       | (KIVAGPV)(K)I/G/P/V/V/V/V/V/V/V/V/V(V K)         | 180.21 | 426.3232 | 1859.961 | -0.0026  | -0.3  | 8.64     | 18466.1    | 5.84 HUMAN  | K1413                     | Pyruvate kinase (Fragment)                                                  |
| 15704 | dirMS_041712_NAR_50mM_plus.8245.8945.3     | 3 | 7.58 | 0 | 1.22E+06       | (RILFSGM)(R)I/E/S/G M/Q/M/S/H/T(K)               | 113.45 | 492.5704 | 1475.698 | -0.0015  | -1.1  | 6.75     | 56607.4    | 5.37 HUMAN  | F8V84                     | Keratin, type II cytoskeletal 8                                             |
| 15705 | dirMS_041712_NAR_60mM_plus.10257.10257.3   | 3 | 7.58 | 1 | 5.26E+05       | (RILQEKD)(R)I(L)Q/E/L/E/L/Q/L/N/D(R)             | 111.75 | 543.9389 | 1629.808 | -0.0057  | -3.5  | 4.18     | 74423.5    | 6.57 HUMAN  | P02545                    | Prelamin-A/C                                                                |
| 15706 | dirMS_041712_NAR_60mM_plus.15131.15131.3   | 3 | 7.58 | 1 | 2.70E+05       | (KIKAMAA)(K)I/A/E/A/A/S/A/J(A)D/A/D/A/D/L/E/R(F) | 135.37 | 639.6435 | 1916.92  | -0.0036  | -1.9  | 4.02     | 25103.6    | 5.88 HUMAN  | D43633                    | Charged multivesicular body protein 2                                       |
| 15707 | dirMS_041712_NAR_60mM_plus.5975.5975.3     | 2 | 7.57 | 0 | 1.13E+05       | (KISSPSS)(K)S/S/S/P/L/S/T(R)                     | 86.53  | 463.2292 | 921.464  | 0.0075   | 8.2   | 9.47     | 55737.3    | 5.55 HUMAN  | O94019                    | Endonuclease domain-containing 3                                            |
| 15708 | dirMS_041712_NAR_40mM_minus.11639.11639.3  | 3 | 7.57 | 1 | 4.75E+04       | (KIVGFGA)(R)I/Q/V/E A/T/K/Q/P/G(T/F/A A A(F))    | 125.53 | 659.6167 | 1906.043 | -0.0077  | -4.1  | 8.59     | 32905.8    | 5.88 HUMAN  | CH919                     | Chaperon D light chain (Fragment)                                           |
| 15709 | dirMS_041712_NAR_40mM_minus.8249.8249.3    | 3 | 7.57 | 0 | 5.10E+02       | (KISVVAE)(K)S/L/V/A/E Y/H S/P E/V D E P(K)       | 130.12 | 664.6437 | 1991.923 | -0.0067  | -3.4  | 4.25     | 54815.2    | 9.17 HUMAN  | P26196                    | Probable ATP-dependent RNA helicase DDX6                                    |
| 15710 | dirMS_041712_NAR_50mM_plus.10081.10081.3   | 3 | 7.57 | 0 | 1.78E+05 M392m | (KIKEMPA)(K)I/M/N/P/A L I(G) I(D L C H G)        | 125.77 | 505.2416 | 1497.719 | 15.9914  | -2.3  | 5.32     | 49982      | 5.86 HUMAN  | BAD7DB                    | T-complex protein 1 subunit epsilon                                         |
| 15711 | dirMS_041712_NAR_50mM_plus.10520.10520.3   | 3 | 7.57 | 0 | 1.72E+05       | (KIVGAGN)(K)I/V/F/G/N/R/T A I S V F(T K L)       | 128.63 | 576.3032 | 1708.902 | -0.0066  | -3.9  | 8.72     | 63374.2    | 8.64 HUMAN  | R05744                    | Glucose-6-phosphatase isomerase                                             |
| 15712 | dirMS_041712_NAR_50mM_plus.15975.15975.3   | 3 | 7.57 | 0 | 3.39E+05       | (KIVSPTM)(K)I/L/P/T/N/I/S/P(I)H/V A R I(F)       | 115.28 | 600.3221 | 1798.96  | -0.0081  | -4.5  | 8.75     | 60985.3    | 5.6 HUMAN   | 075131                    | Copine-3                                                                    |
| 15713 | dirMS_041712_NAR_50mM_plus.7116.7116.3     | 3 | 7.57 | 1 | 2.74E+04       | (RILAEKA)(R)I/L/A/E E/A Q/A S A/P V G S R(G)     | 107.42 | 548.29   | 1642.876 | -0.0204  | -12.4 | 6.14     | 23811.2    | 6.78 HUMAN  | ABMV05                    | Tubulin-folding cofactor 8                                                  |
| 15714 | dirMS_041712_NAR_50mM_plus.8658.8658.3     | 3 | 7.57 | 1 | 2.43E+05       | (RIVAGTV)(R)I/G/T/G/V/D/N V/D L E A A T R(K)     | 115.55 | 539.6119 | 1616.824 | -0.0027  | -1.7  | 4.56     | 57391.2    | 6.29 HUMAN  | D43175                    | D-3-phosphoglycerate dehydrogenase                                          |
| 15715 | dirMS_041712_NAR_60mM_plus.14564.14564.3   | 3 | 7.57 | 0 | 3.50E+05       | (KIKMPTM)(K)I/M/P/L/T/H/ N/L/S N R(G)            | 140.87 | 474.2636 | 1420.791 | -0.0144  | -10.2 | 8.76     | 18070.1    | 6.52 HUMAN  | Q5T0W8                    | Acidic (Leucine-rich) nuclear phosphoprotein 32 family, member B (Fragment) |
| 15716 | dirMS_041712_NAR_60mM_plus.15229.15229.3   | 3 | 7.57 | 1 | 3.39E+05       | (KIKALQI)(K)I/L/K/K/L/E Q/L/Q/D/Q/A/R(K)         | 144.37 | 506.9421 | 1518.816 | -0.0045  | -3    | 4.68     | 23903      | 4.94 HUMAN  | 047091                    | Plectin (Fragment)                                                          |
| 15717 | dirMS_041712_NAR_60mM_minus.5880.5880.3    | 3 | 7.57 | 0 | 3.55E+05 M81m  | (KIVDPV)(K)I/F/D/V/P V Q A D M L(K)              | 88.95  | 494.9008 | 1263.604 | 219.084  | 6.6   | 4.21     | 58502.6    | 6.09 HUMAN  | BADYX3                    | Heat shock 70 kDa protein 1-like                                            |
| 15718 | dirMS_041712_NAR_60mM_minus.8430.8430.3    | 3 | 7.57 | 1 | 5.51E+04       | (RIFEEKA)(R)I/E/E/E V/L K A/E/E R(K)             | 107.07 | 501.9085 | 1536.718 | -0.0067  | -4.4  | 4.2      | 26810.9    | 6.15 HUMAN  | Q8C919                    | EF-hand domain-containing protein D2                                        |
| 15719 | dirMS_041712_NAR_120mM_plus.6154.6154.3    | 3 | 7.57 | 0 | 7.08E+05       | (KIKRPTQ)(K)I/R/P/Q/A/T/A/Q I(L)                 | 85.93  | 437.9687 | 1297.697 | -0.0116  | -1.2  | 9.6      | 113668.7   | 6.2 HUMAN   | FRW726                    | Ubiquitin-associated protein 2-like                                         |
| 15720 | dirMS_041712_NAR_120mM_plus.18313.18313.3  | 3 | 7.57 | 0 | 2.72E+06       | (KIVGAGN)(K)I/V/V/V/V/V/V/V/V/V/V/V(V K)         | 96.23  | 427.264  | 1215.813 | -0.0024  | -1.6  | 3.23     | 21977      | 6.27 HUMAN  | FR797                     | Calreticulin                                                                |
| 15721 | dirMS_041712_NAR_120mM_plus.8652.8652.3    | 3 | 7.57 | 0 | 2.25E+06       | (KIKRQPS)(K)I/H/T/Q/S P/D/T/A/Q(D G V R/L)       | 99.03  | 562.26   | 1684.767 | -0.0019  | -1.2  | 5.21     | 18511.8    | 5.62 HUMAN  | D6R70                     | Heterogeneous nuclear ribonucleoprotein H (Fragment)                        |
| 15722 | dirMS_041712_NAR_20mM_plus.11998.11998.2   | 2 | 7.57 | 0 | 4.00E+04       | (RITPGLV)(R)I/T/P I/G L V P K(E)                 | 155.55 | 477.2872 | 953.567  | 0.0005   | 0.5   | 6.1      | 56522.6    | 6.66 HUMAN  | BADW73                    | Phosphoenolpyruvate carboxykinase (GTP), mitochondrial                      |
| 15723 | dirMS_041712_NAR_20mM_plus.12013.12013.2   | 2 | 7.57 | 0 | 4.22E+04 M65m  | (RIVLVFM)(R)I/V/L/V/F V M G(N/E)                 | 155.75 | 454.7679 | 893.533  | 15.9961  | 1.3   | 8.72     | 9912.2     | 9.69 HUMAN  | C8I712                    | Profilin-2                                                                  |
| 15724 | dirMS_041712_NAR_20mM_plus.14690.14690.2   | 2 | 7.57 | 0 | 1.02E+05       | (RIFDTLQ)(R)I/L/D/L/L/V/L/V/S F(S F)             | 172.52 | 521.2419 | 1233.674 | -0.0034  | -2.7  | 5.23     | 4393.9     | 6.47 HUMAN  | ABN148                    | Microchondrial import inner membrane translocase subunit Timb B             |
| 15725 | dirMS_041712_NAR_20mM_plus.18601.18601.2   | 2 | 7.57 | 0 | 5.88E+04 3314z | (RIVVAGS)(R)I/T/V/V/S/G/L R(E)                   | 189.5  | 567.8286 | 913.557  | 203.0928 | 11.8  | 9.41     | 523482.6   | 5.17 HUMAN  | Q07954                    | Prolow-density lipoprotein receptor-related protein 2                       |
| 15726 | dirMS_041712_NAR_20mM_plus.6832.6832.2     | 2 | 7.57 | 0 | 4.52E+05 M132m | (RIMVGGI)(R)I/M/V/G/A I/Q G S G K(T)             | 112.75 | 590.2864 | 1163.573 | 15.993   | -1.6  | 5.84     | 73202      | 9.19 HUMAN  | CJMU5                     | Probable ATP-dependent RNA helicase DDX17                                   |
| 15727 | dirMS_041712_NAR_30mM_plus.17183.17305.2   | 2 | 7.57 | 0 | 5.42E+05       | (RIVGVGIF)(R)I/L/V/G/E/E K(E)                    | 143.98 | 431.7495 | 862.503  | -0.0116  | -13.4 | 6        | 334221.3   | 6.44 HUMAN  | P15924                    | Desmoplakin                                                                 |
| 15728 | dirMS_041712_NAR_30mM_plus.6791.6791.2     | 2 | 7.57 | 0 | 9.23E+04       | (RIVGAGL)(R)I/G/A/E/Q/A I/E/G G R(M)             | 90.18  | 494.2448 | 987.485  | -0.0131  | -3.1  | 4.53     | 59953.2    | 6.14 HUMAN  | GV370A                    | NOL1/NOP2/Sun domain family, member 2, isoform CRA_b                        |
| 15729 | dirMS_041712_NAR_30mM_plus.7274.7274.2     | 2 | 7.57 | 0 | 3.05E+05       | (KIKSAGTE)(K)I/S/A/I/T/G V P A K(E)              | 92.77  | 450.7665 | 900.515  | -0.0012  | -1.3  | 8.75     | 8956.4     | 10.28 HUMAN | UKR13                     | 60S ribosomal protein L23                                                   |
| 15730 | dirMS_041712_NAR_40mM_plus.12961.12961.3   | 3 | 7.57 | 0 | 3.01E+05       | (KIMPPSG)(K)I/P/L/P S G A/P/V/T G/P P/V V A(K)   | 142.87 | 627.031  | 1879.08  | -0.0015  | -0.8  | 8.76     | 31450.7    | 5.73 HUMAN  | F5H46D                    | Ras GTPase-activating protein-binding protein 1                             |
| 15731 | dirMS_041712_NAR_60mM_plus.4789.4789.3     | 3 | 7.57 | 1 | 3.22E+05       | (KIVAGAE)(K)I/G/A/V/A/E/E/R A/E A/T R(A)         | 79.42  | 425.868  | 1275.592 | -0.0029  | -2.3  | 4.41     | 57204.9    | 6.01 HUMAN  | F5GWF6                    | T-complex protein 1 subunit beta                                            |
| 15732 | dirMS_041712_NAR_120mM_minus.12526.12526.3 | 3 | 7.56 | 1 | 3.39E+05 M316m | (KIVSPTM)(K)I/L/P/T/N/I/S/P(I)H/V A R I(F)       | 122.32 | 467.9028 | 1385.699 | 15.9944  | -0.4  | 9.6      | 42831.5    | 4.86 HUMAN  | AK854                     | HCG1983504, isoform CRA_f                                                   |
| 15733 | dirMS_041712_NAR_120mM_plus.18423.18423.3  | 3 | 7.56 | 0 | 1.60E+05       | (KIVSPTM)(K)I/L/P/T/N/I/S/P(I)H/V A R I(F)       | 155.33 | 544.2467 | 1480.815 | -0.0011  | -4.1  | 24.80    | 48874.7    | 6.47 HUMAN  | ABN148                    | Microchondrial import inner membrane translocase subunit Timb B             |
| 15734 | dirMS_041712_NAR_20mM_plus.9180.9180.2     | 2 | 7.56 | 0 | 5.67E+05       | (RIVSDFI)(R)I/L/S/P/T/V D S S K(E)               | 141.55 | 605.9186 | 1210.631 | 0.0005   | 0.4   | 5.81     | 25825.5    | 5.48 HUMAN  | F7E9N5                    | Filamin-B                                                                   |
| 15735 | dirMS_041712_NAR_30mM_minus.10111.10165.2  | 2 | 7.56 | 0 | 1.66E+05       | (RIVYALV)(R)I/Y/A/L/V G G R(G)                   | 109.23 | 461.2392 | 921.479  | -0.0057  | -8.4  | 6        | 276041.1   | 6.01 HUMAN  | A93927                    | Fatty acid synthase                                                         |
| 15736 | dirMS_041712_NAR_30mM_plus.10287.10287.2   | 2 | 7.56 | 0 | 1.33E+06       | (RILSPEAR)(R)I/S I/Y/E A R(K)                    | 110.6  | 426.2334 | 851.462  | -0.0026  | -3.1  | 6        | 266161     | 5.68 HUMAN  | E9PPJ0                    | Epipkalin                                                                   |
| 15737 | dirMS_041712_NAR_40mM_minus.6152.6152.3    | 3 | 7.56 | 0 | 1.55E+05       | (KIVGAGN)(K)I/V/V/V/V/V/V/V/V/V/V/V(V K)         | 101.52 | 540.2599 | 1079.512 | -0.0009  | 0.8   | 4.37     | 37296.3    | 5.3 HUMAN   | F8V84                     | Keratin, type II cytoskeletal 8                                             |
| 15738 | dirMS_041712_NAR_60mM_minus.11311.11311.3  | 3 | 7.56 | 0 | 2.48E+05       | (RIVAFSE)(R)I/P/L/E/S L Q/Q H A R I(S)           | 121.55 | 431.2376 | 1291.712 | -0.035   | -10.4 | 6.79     | 31463.6    | 5.53 HUMAN  | 094760                    | NG1(N)G dimethylarginine dimethylaminohydrochloride 1                       |
| 15739 | dirMS_041712_NAR_60mM_plus.11504.11504.3   | 3 | 7.56 | 1 | 1.64E+05       | (KIVNDIK)(K)I/V/D/L/K/D/P E T Y K(Q)             | 124.33 | 457.5867 | 1370.753 | -0.0017  | -4.1  | 4.56     | 124524.8   | 5.71 HUMAN  | 014980                    | Exportin-1                                                                  |
| 15740 | dirMS_041712_NAR_60mM_minus.1898.1898.3    | 3 | 7.56 | 1 | 2.51E+05       | (KIVYALY)(K)I/Y/V/A/V/L/V Q P L D R(K)           | 154.53 | 504.9409 | 1512.821 | -0.0128  | -11.8 | 8.49     | 42989.1    | 4.49 HUMAN  | B3KNT8                    | Nucleosome assembly protein 1-like 1                                        |
| 15741 | dirMS_041712_NAR_60mM_minus.9804.9804.3    | 3 | 7.56 | 1 | 2.10E+05       | (KIVLTRA)(K)I/Q/V/A/V/A/V/L/S E(K)               | 117.42 | 410.9037 | 1230.68  | 0.0165   | 11.4  | 8.75     | 52940.3    | 4.35 HUMAN  | QJULW6                    | Nucleosome assembly protein 1-like 2                                        |
| 15742 | dirMS_041712_NAR_120mM_plus.12386.12386.3  | 3 | 7.56 | 0 | 1.25E+06       | (KIVSAGP)(R)I/S/A/I/T/G V P A K(E)               | 125.23 | 569.9613 | 1207.871 | 0.0021   | -1.2  | 9.74     | 56491.1    | 6.47 HUMAN  | BA0762                    | Elongation factor 1 gamma                                                   |
| 15743 | dirMS_041712_NAR_120mM_plus.14973.14973.4  | 4 | 7.56 | 1 | 2.36E+06       | (KILDSQI)(K)I/D K S G I H D I(V/LV/G/G S T R I)  | 131.17 |          |          |          |       |          |            |             |                           |                                                                             |

|       |                                           |   |      |           |                                                      |        |          |          |         |        |      |          |       |       |        |                                                                     |
|-------|-------------------------------------------|---|------|-----------|------------------------------------------------------|--------|----------|----------|---------|--------|------|----------|-------|-------|--------|---------------------------------------------------------------------|
| 15801 | drMs_D41712_NAR_30mM_minus.8229.8229.2    | 2 | 7.53 | 0.389E+05 | (K)SFQSSQ(K)G/P/Q/G/S/L/S R(D)                       | 99.82  | 502.2591 | 1039.517 | -0.0058 | -5.6   | 9.47 | 100478.9 | 5.71  | HUMAN | BMX9P  | Matrix-                                                             |
| 15802 | drMs_D41712_NAR_60mM_minus.15500.15500.3  | 7 | 7.53 | 1.223E+05 | (R)GFRM(R)G P I K A/V M/G D/A/G/W/G/V/N N R(I)       | 146.48 | 563.9575 | 1689.86  | -0.0015 | -0.9   | 6.07 | 26394.9  | 6.5   | HUMAN | BSMDF5 | GTP-binding nuclear protein Ran                                     |
| 15803 | drMs_D41712_NAR_50mM_minus.15950.15950.3  | 7 | 7.53 | 1.304E+05 | (K)FPRK(K)G P I P L Q/P/Q/P(R)                       | 149.17 | 535.151  | 1711.0   | -0.0017 | -2.1   | 5.96 | 25380.5  | 6.1   | HUMAN | FRS066 | Proteinase-6                                                        |
| 15804 | drMs_D41712_NAR_20mM_plus.16949.16949.3   | 3 | 7.53 | 0.300E+05 | (R)WAKM(K)Q V/A A/M/A Q/G/L/L Q/L(R)M                | 187.88 | 518.2975 | 1552.881 | -0.0026 | -1.7   | 5.97 | 10728.1  | 9.15  | HUMAN | OY514  | Mitochondrial import inner membrane translocase subunit Tim13       |
| 15805 | drMs_D41712_NAR_20mM_plus.18274.18274.2   | 2 | 7.53 | 0.409E+05 | (K)MLVPSL(K)Q L V/L P/L S S R(I)                     | 196.7  | 542.8388 | 1084.672 | -0.0021 | -2     | 9.75 | 39066    | 6.61  | HUMAN | APVWVS | Selenium binding protein 1 (Fragment)                               |
| 15806 | drMs_D41712_NAR_30mM_plus.21393.21393.3   | 7 | 7.53 | 0.409E+05 | (R)MGQM(R)M G Q/V A/M G Q/A/W/G/V/N N R(I)           | 113.05 | 518.8921 | 1538.67  | 15.9923 | -1.7   | 9.5  | 43979.5  | 8.92  | HUMAN | FSG23  | Non-POU domain-containing octamer-binding protein                   |
| 15807 | drMs_D41712_NAR_30mM_plus.22041.22041.2   | 2 | 7.53 | 0.232E+05 | (K)EWPQR(K)E N/P L Q/P(Q)P(R)                        | 116.12 | 438.2384 | 975.467  | -0.0006 | -0.7   | 6.1  | 71216.8  | 6.3   | HUMAN | AY188  | Radioligand                                                         |
| 15808 | drMs_D41712_NAR_30mM_plus.25674.15674.2   | 2 | 7.53 | 0.360E+05 | (R)DIPPP(R)R T/P/T/P/F/G R(D)                        | 134.4  | 523.7704 | 1045.542 | 0.0007  | 9.3    | 9.75 | 69661.6  | 9.75  | HUMAN | DSK96K | RNA-binding protein 14                                              |
| 15809 | drMs_D41712_NAR_30mM_plus.28428.18428.2   | 2 | 7.53 | 0.150E+05 | (K)DVLVSA(K)Q L V/S/V A/F S S D/R(N)Q                | 149.78 | 655.3231 | 1309.638 | 0.0079  | 0.5    | 4.21 | 33029.4  | 9.62  | HUMAN | D6R9L0 | Guanine nucleotide-binding protein subunit beta-2-like 1 (Fragment) |
| 15810 | drMs_D41712_NAR_30mM_plus.22007.22007.2   | 2 | 7.53 | 0.176E+05 | (R)WQFLT(R)W/Q/I/F/L T R(L)                          | 170.85 | 482.2695 | 963.541  | -0.0093 | -9.7   | 9.75 | 132493.1 | 6.53  | HUMAN | B4DE1  | Leucine-tRNA ligase, cytoplasmic                                    |
| 15811 | drMs_D41712_NAR_30mM_plus.2444.944.2      | 2 | 7.53 | 0.885E+04 | (R)NYYN(R)N/V/V/N E S/A T/G G K(Y)                   | 118.58 | 664.8248 | 1328.648 | -0.0058 | -4.4   | 6    | 50286.6  | 4.79  | HUMAN | P68371 | Tubulin beta-4b chain                                               |
| 15812 | drMs_D41712_NAR_50mM_plus.21460.13460.3   | 3 | 7.53 | 0.905E+05 | (R)TYVTE(R)T V/W/L Q/G L M A G(R)                    | 138.75 | 421.292  | 1261.166 | -0.004  | -0.4   | 6.41 | 42880.1  | 7.1   | HUMAN | PH9111 | Glycosylation factor T4, mitochondrial                              |
| 15813 | drMs_D41712_NAR_50mM_plus.21202.21202.3   | 3 | 7.53 | 0.235E+06 | (R)AGKVP(R)R A G K P V I C A/V/Q/M/E A S M K(K)      | 180.87 | 626.3278 | 1876.969 | -0.0005 | -0.3   | 8.64 | 18466.1  | 5.78  | HUMAN | H3BSJ3 | Pyruvate kinase (Fragment)                                          |
| 15814 | drMs_D41712_NAR_50mM_plus.21705.21705.3   | 3 | 7.53 | 1.208E+05 | (R)JKVPEL(R)K V P/E L M I E M T A P K(N)             | 185.52 | 545.2925 | 1633.869 | -0.0063 | -3.8   | 6.14 | 95051    | 6.83  | HUMAN | B3K0V5 | AP-1 complex subunit gamma-1                                        |
| 15815 | drMs_D41712_NAR_50mM_plus.8313.8313.3     | 3 | 7.53 | 0.233E+05 | (K)VDQAL(K)G V/Q/L Q/E L H/T G S L P R(I)            | 110.33 | 479.2607 | 1435.765 | 0.0023  | 1.6    | 6.72 | 26760.7  | 5.95  | HUMAN | Q13085 | Acetyl-CoA carboxylase 1                                            |
| 15816 | drMs_D41712_NAR_60mM_plus.11543.11543.3   | 3 | 7.53 | 2.238E+05 | (K)KFTAG(K)K E I A G Q/P/E I P S T A K S(K)          | 117.53 | 629.2982 | 1888.981 | -0.0056 | -3     | 4.49 | 14458.2  | 9.22  | HUMAN | OS713  | Cytochrome c oxidase assembly factor 6 homolog                      |
| 15817 | drMs_D41712_NAR_60mM_plus.17891.17891.3   | 3 | 7.53 | 1.104E+06 | (R)ARFEEL(R)R A R F/E/L N/A/D L F R(I)               | 105.85 | 494.2554 | 1480.754 | -0.0027 | -1.8   | 4.68 | 4508.6   | 5.5   | HUMAN | AKR7Q2 | Head shock cognate 73 kDa protein                                   |
| 15818 | drMs_D41712_NAR_120mM_minus.11162.11162.2 | 2 | 7.52 | 1.402E+05 | (R)JLASYD(R)R A I S Y L D R/V R(S)                   | 114.85 | 546.811  | 1092.616 | -0.0013 | -1.2   | 8.75 | 43773.3  | 5.26  | HUMAN | F8V29  | Keratin, type I cytoskeletal 18                                     |
| 15819 | drMs_D41712_NAR_120mM_minus.17248.17248.4 | 4 | 7.52 | 2.624E+05 | (R)KVVSD(R)K V E S S/Q/E E I A F A K K(L)            | 148.93 | 616.2415 | 1661.947 | -0.0031 | -1.9   | 6.23 | 49709.6  | 5.19  | HUMAN | 80YIC4 | Vimentin                                                            |
| 15820 | drMs_D41712_NAR_120mM_minus.4217.4217.3   | 3 | 7.52 | 1.633E+05 | (R)EFPAP(R)E P/E G A G Q/D/G/S G R(S)                | 70.47  | 443.2041 | 1327.599 | -0.0008 | -0.6   | 4.56 | 558007.1 | 5.44  | HUMAN | PS5007 | Epiplectin                                                          |
| 15821 | drMs_D41712_NAR_20mM_minus.10778.10778.3  | 3 | 7.52 | 1.400E+05 | (K)YVNGS(K)V N Q/U G S I/T S/Q/A C K(L)              | 155.85 | 545.2807 | 1633.821 | 0.0062  | 3.8    | 5.97 | 47328.4  | 7.76  | HUMAN | P13929 | Beta-enolase                                                        |
| 15822 | drMs_D41712_NAR_30mM_minus.14753.14753.2  | 2 | 7.52 | 0.372E+05 | (K)LDAGSS(K)Q D L I A/G S I I G K(G)                 | 133.25 | 437.2551 | 873.504  | -0.0011 | -1.2   | 5.84 | 51260.6  | 5.39  | HUMAN | P61978 | Heterogeneous nuclear ribonucleoprotein K                           |
| 15823 | drMs_D41712_NAR_30mM_minus.15591.15591.2  | 2 | 7.52 | 0.148E+05 | (K)AMTQ(R)K M/V/G/Q/V E Q W/P Y/R(I)                 | 133.38 | 669.3137 | 1337.631 | -0.0036 | -2.7   | 6.04 | 56186.7  | 5.47  | HUMAN | B4DU08 | T-complex protein 1 subunit gamma                                   |
| 15824 | drMs_D41712_NAR_30mM_minus.10766.10766.3  | 3 | 7.52 | 0.127E+05 | (K)AVWKR(K)A I/V V/P G V/P M I E V L N K(E)          | 104.87 | 575.0112 | 1707.024 | 15.9953 | 0.2    | 8.56 | 73146.9  | 5.45  | HUMAN | EP9121 | Hypoxia-up-regulated protein 1 (Fragment)                           |
| 15825 | drMs_D41712_NAR_40mM_minus.5870.5870.2    | 2 | 7.52 | 0.880E+05 | (R)KFRP(K)K G F/R A/D G Q/V L R(I)                   | 97.85  | 488.7279 | 976.448  | 0.0007  | 4.2    | 42   | 123097.1 | 5.83  | HUMAN | AS480  | POTE ankyrin domain family member F                                 |
| 15826 | drMs_D41712_NAR_50mM_minus.18213.18213.3  | 3 | 7.52 | 1.239E+05 | (K)KLEAE(L)K K E A E L L E I P/L M/P A R(I)          | 172.8  | 574.9957 | 1722.982 | -0.0097 | -5.6   | 4.79 | 56164.6  | 6.01  | HUMAN | EP9973 | Coatomer subunit beta (Fragment)                                    |
| 15827 | drMs_D41712_NAR_20mM_plus.12246.12246.2   | 2 | 7.52 | 0.461E+04 | (K)VALSSE(K)A I/L/S/E T E V A L A R(I)               | 157.62 | 673.3693 | 1345.732 | -0.0008 | -0.6   | 4.53 | 24695.2  | 5.91  | HUMAN | TEVAD0 | Microtubule-associated protein                                      |
| 15828 | drMs_D41712_NAR_20mM_plus.9037.9037.2     | 2 | 7.52 | 0.520E+03 | (R)ILAADES(R)I A I A I/A/S G V E R I(Q)              | 132.4  | 575.3015 | 1115.605 | -0.0058 | -5.1   | 4.53 | 25585.5  | 4.8   | HUMAN | F28072 | Lactate dehydrogenase type-6                                        |
| 15829 | drMs_D41712_NAR_30mM_plus.19329.19329.2   | 2 | 7.52 | 2.186E+05 | (K)MFGSAL(K)M/V L Q/V G L M A G(V)R(A)               | 116.26 | 434.9004 | 1291.566 | -0.0008 | -0.6   | 4.53 | 24695.2  | 5.91  | HUMAN | TEVAD0 | Yeast-acting ATPase                                                 |
| 15830 | drMs_D41712_NAR_30mM_plus.22165.22165.2   | 2 | 7.52 | 0.955E+04 | (L)MPLSL(L)M/L/P/L S/L K(T)                          | 171.23 | 457.7881 | 914.574  | -0.0004 | -5.9   | 8.55 | 15520.6  | 10.36 | HUMAN | OY9420 | US mRNA-associated Sm-like protein L5m4                             |
| 15831 | drMs_D41712_NAR_30mM_plus.22398.22398.2   | 2 | 7.52 | 0.390E+04 | (R)WLLDFR(R)R L/D L F/A/S K(R)                       | 173.55 | 490.2728 | 979.525  | 0.0136  | 13.9   | 5.84 | 59384    | 7.79  | HUMAN | B72329 | Long-chain-fatty-acyl-CoA ligase 1                                  |
| 15832 | drMs_D41712_NAR_40mM_plus.12664.12664.2   | 2 | 7.52 | 0.254E+04 | (K)KCSWV(K)C I/S V N I/V/D L R I(A)                  | 120.23 | 610.297  | 1219.589 | -0.0021 | -1.7   | 5.84 | 19395.5  | 5.38  | HUMAN | G3V399 | DNA-(apurinic or apyrimidinic site) lyase (Fragment)                |
| 15833 | drMs_D41712_NAR_40mM_plus.19238.19238.2   | 2 | 7.52 | 0.483E+05 | (R)EAEV(R)K V S I/V G L A/V N G L R(I)               | 102.43 | 573.5251 | 938.455  | -0.0043 | -4.6   | 6.07 | 105853.1 | 5.62  | HUMAN | Y1P    | YLP metal-binding containing protein 1                              |
| 15834 | drMs_D41712_NAR_50mM_plus.12310.12310.3   | 3 | 7.52 | 1.491E+05 | (K)JLDSVGL(K)I/L/D/S V/G I E A D D/R L N K(V)        | 132.85 | 591.6385 | 1772.902 | -0.0015 | -0.9   | 4.04 | 11664.7  | 4.42  | HUMAN | PK5387 | 60S acidic ribosomal protein P2                                     |
| 15835 | drMs_D41712_NAR_50mM_plus.14028.14028.3   | 3 | 7.52 | 1.166E+06 | M457M (R)M G P L(R)M/G I P G L D H M A/S A/S I E(R)M | 142.9  | 508.9004 | 1613.777 | 15.9992 | 2.6    | 5.3  | 77799.7  | 9.02  | HUMAN | PS5272 | Heterogeneous nuclear ribonucleoprotein M                           |
| 15836 | drMs_D41712_NAR_50mM_plus.18178.18178.3   | 3 | 7.52 | 1.521E+05 | (K)VIAMT(K)K V A/V A/N R V D/V/D/P A L L R(S)        | 164.43 | 617.365  | 1850.086 | -0.0069 | -3.7   | 5.93 | 32827.5  | 5.92  | HUMAN | EP9K05 | 26S protease regulatory subunit G6 (Fragment)                       |
| 15837 | drMs_D41712_NAR_50mM_plus.6949.6949.3     | 3 | 7.52 | 1.824E+05 | (K)VIADK(R)K V I/A D P Q S V V I T A N S K(I)        | 101.55 | 504.2628 | 1510.775 | -0.0009 | -0.6   | 5.96 | 25445.8  | 5.52  | HUMAN | AMW950 | L-lactate dehydrogenase (Fragment)                                  |
| 15838 | drMs_D41712_NAR_50mM_plus.10010.10010.3   | 3 | 7.52 | 1.022E+06 | (K)YVATTE(K)K V A/V T G D/H M G I(R)T                | 112.6  | 434.9004 | 1302.648 | 0.0066  | 5      | 6.74 | 139893.7 | 8.06  | HUMAN | PS5621 | Coatomer subunit alpha                                              |
| 15839 | drMs_D41712_NAR_60mM_plus.7347.7347.3     | 3 | 7.52 | 0.936E+05 | (R)IAAHSE(R)R A H S E G T T A/V/L A/D R I(Q)         | 96.68  | 510.9035 | 1530.697 | -0.0006 | -0.4   | 5.32 | 52829.5  | 6.01  | HUMAN | F78371 | T-complex protein 1 subunit beta                                    |
| 15840 | drMs_D41712_NAR_120mM_minus.20217.20217.3 | 3 | 7.51 | 0.172E+05 | M195M (R)H F M F(R)H F F M P I/P A/P L T S R(I)      | 165.67 | 546.2809 | 1603.635 | 15.9926 | -1.4   | 9.75 | 42820.5  | 4.77  | HUMAN | AN6X28 | Putative tubulin beta chain-like protein ENSP0000290377             |
| 15841 | drMs_D41712_NAR_30mM_minus.12360.12360.2  | 2 | 7.51 | 0.296E+05 | (K)STTDS(K)T I/L/T/D S L V C/A(K)                    | 120.75 | 562.2838 | 1213.566 | -0.0006 | -0.4   | 5.55 | 96306.4  | 6.41  | HUMAN | P13639 | Elongation factor 2                                                 |
| 15842 | drMs_D41712_NAR_50mM_minus.13961.13961.3  | 3 | 7.51 | 4.458E+05 | (R)KVVSD(R)K V E S S/Q/E E I A F A K K(L)            | 148.93 | 616.2415 | 1661.947 | -0.0031 | -1.7   | 6.23 | 49709.6  | 5.19  | HUMAN | 80YIC4 | Vimentin                                                            |
| 15843 | drMs_D41712_NAR_50mM_plus.16160.16160.3   | 3 | 7.51 | 1.493E+06 | (R)YFELSR(V)K V A/V Q/V G L M A G(V)R(A)             | 159.72 | 460.5908 | 1379.575 | -0.0009 | -0.7   | 6.04 | 13378.8  | 6.42  | HUMAN | P13557 | Peptidyl-glyoxylate cis-trans isomerase                             |
| 15844 | drMs_D41712_NAR_50mM_minus.9274.9274.3    | 3 | 7.51 | 0.154E+05 | (R)ITPVDR(R)T P V/I/D D A D/K P V S S Q L R(V)       | 121.28 | 542.6354 | 1625.886 | 0.0059  | 3.7    | 5.62 | 53513.6  | 6.01  | HUMAN | Q12404 | Cytosolic dynein 1 heavy chain 1                                    |
| 15845 | drMs_D41712_NAR_60mM_minus.10081.10081.3  | 3 | 7.51 | 1.676E+04 | (K)KALDLS(K)K L/D L/D S S C E A/D A/Q Y 92(I)        | 115.93 | 633.6235 | 1898.855 | 0.0011  | 0.6    | 4.23 | 60044.6  | 6.4   | HUMAN | FSH071 | Stress-induced-phosphoprotein 1                                     |
| 15846 | drMs_D41712_NAR_60mM_minus.10897.10897.3  | 3 | 7.51 | 1.239E+05 | (K)KALDLS(K)K L/D L/D S S C E A/D A/Q Y 92(I)        | 120.8  | 653.2461 | 1923.718 | -0.0043 | -4.6   | 6.07 | 19213.2  | 4.66  | HUMAN | K7F4D9 | Keratin, type I cytoskeletal 13 (Fragment)                          |
| 15847 | drMs_D41712_NAR_20mM_plus.10451.10451.3   | 3 | 7.51 | 2.406E+05 | (R)ADGAF(R)R A Q I/V A/N/T/V/D N A R(I)              | 145.25 | 440.5608 | 1319.67  | -0.0024 | -1.8   | 5.88 | 43773.3  | 5.26  | HUMAN | F8V29  | Keratin, type I cytoskeletal 18                                     |
| 15848 | drMs_D41712_NAR_20mM_plus.11057.11057.2   | 2 | 7.51 | 0.101E+05 | M196M (K)D ADGAT(K)D A G T I/V I G L N V R N R(I)    | 148.68 | 617.3237 | 1217.631 | 16.0094 | 11.8   | 5.84 | 72445.7  | 5.07  | HUMAN | P11021 | 78 kDa glucose-regulated protein                                    |
| 15849 | drMs_D41712_NAR_20mM_plus.14578.14578.2   | 2 | 7.51 | 4.500E+04 | M256M (R)SLDMS(K)R S L I/D I/D I S I A E/E K(I)      | 171.72 | 668.8371 | 1320.671 | 15.9954 | 0.3    | 4.03 | 37296.3  | 5.3   | HUMAN | F8VU64 | Keratin, type II cytoskeletal 8                                     |
| 15850 | drMs_D41712_NAR_20mM_plus.9610.9610.2     | 2 | 7.51 | 0.118E+05 | (K)VAGGDS(K)K V G C/D G S V V/D F K(I)               | 137.93 | 617.8225 | 1234.643 | -0.0049 | -4     | 5.81 | 17127.4  | 10.05 | HUMAN | AM8027 | Small ubiquitin-related modifier 3                                  |
| 15851 | drMs_D41712_NAR_30mM_plus.21947.21947.2   | 2 | 7.51 | 2.256E+06 | (R)WTKAE(R)R V I/F I T A G Q/V L P R(I)              | 169.17 | 482.4949 | 1377.744 | 0.006   | 6.8    | 9.12 | 108874   | 6.18  | HUMAN | PH9874 | Poly (ADP-ribose) polymerase 1                                      |
| 15852 | drMs_D41712_NAR_30mM_plus.22177.22177.2   | 2 | 7.51 | 0.179E+05 | (K)IGLSLLC(K)G L I/S/L A/Q V L N F T K(S)            | 171.87 | 620.3199 | 1239.64  | -0.0077 | -6.2</ |      |          |       |       |        |                                                                     |







|       |                                            |   |      |   |                |                                                         |        |          |          |         |       |      |          |      |       |        |                                                               |
|-------|--------------------------------------------|---|------|---|----------------|---------------------------------------------------------|--------|----------|----------|---------|-------|------|----------|------|-------|--------|---------------------------------------------------------------|
| 16128 | dirMS_041712_NAR_120mM_plus.12173.12173.3  | 3 | 7.4  | 2 | 6.50E+05       | (R)TALAEIA(R)T/LA/E I/V A/K E/L D/N M P L R G K(K)      | 163.62 | 666.7047 | 1998.105 | -0.0057 | -2.8  | 5.85 | 23729.5  | 9.88 | HUMAN | C9Z17  | Non-POU domain-containing octamer-binding protein (Fragment)  |
| 16129 | dirMS_041712_NAR_20mM_plus.10428.10428.2   | 2 | 7.4  | 0 | 1.08E+05       | (K)VDSPS(K)Y(Q)I(SV)D S G G L/P A/F(R)S                 | 144.47 | 677.8458 | 1534.696 | -0.0118 | -8.7  | 4.37 | 73399.3  | 6.86 | HUMAN | C9Z45  | Far upstream element-binding protein 2                        |
| 16130 | dirMS_041712_NAR_20mM_plus.18531.18531.2   | 2 | 7.4  | 0 | 6.91E+05       | (R)AAGDWT(K)A(A)I(D)G L/D L Q/T E Q R(R)                | 150.21 | 751.751  | 1021.973 | -0.0074 | -5.1  | 6.75 | 1021.973 | 6.86 | HUMAN | C9Z46  | RNA-binding protein FUS                                       |
| 16131 | dirMS_041712_NAR_30mM_plus.20247.20247.2   | 2 | 7.4  | 0 | 3.58E+04       | (R)TMMNLE(R)T/LM/V/G L G L/A N A/R(K)                   | 159.45 | 608.3434 | 1215.688 | -0.0038 | -6.8  | 9.41 | 22562.2  | 8.8  | HUMAN | P3780  | Transgelin-2                                                  |
| 16132 | dirMS_041712_NAR_30mM_plus.2602.2602.2     | 2 | 7.4  | 0 | 2.68E+05 M283m | (R)YDDM(R)D(Y)D(D) M SVP(R)                             | 84.22  | 507.6956 | 998.388  | -0.0055 | -6.6  | 3.93 | 51260.6  | 5.39 | HUMAN | PE1978 | Heterogeneous nuclear ribonucleoprotein K                     |
| 16133 | dirMS_041712_NAR_30mM_plus.8540.8540.2     | 2 | 7.4  | 0 | 4.51E+05       | (R)FAGVQ(R)F(N)/Q(V)G(V)G(K)                            | 97.98  | 417.2466 | 833.488  | -0.002  | -2.4  | 8.75 | 11439.8  | 9.3  | HUMAN | G3XAN8 | Mitochondrial import inner membrane translocase subunit Timb8 |
| 16134 | dirMS_041712_NAR_40mM_plus.2529.2529.2     | 2 | 7.4  | 0 | 5.58E+04       | (R)HAGDGS(R)R G D E L/P A/F(R)S(E)S                     | 91.22  | 436.9936 | 1272.541 | -0.005  | -3.5  | 3.83 | 7656.6   | 6.56 | HUMAN | U30490 | Hepatitis B-derived growth factor-related protein 2           |
| 16135 | dirMS_041712_NAR_50mM_plus.11425.11425.3   | 3 | 7.4  | 0 | 1.74E+05       | (K)LAQDAQ(K)U/LAE/QA/E R Y/D D M A A A/K(K)             | 127.98 | 604.9469 | 1812.825 | -0.0007 | -0.4  | 4.32 | 2819.6   | 4.76 | HUMAN | P31466 | 16-3-3 protein beta/alpha                                     |
| 16136 | dirMS_041712_NAR_50mM_plus.11524.11524.3   | 3 | 7.4  | 0 | 6.51E+05       | (R)DVCV(R)R(V)I/V/V/D P D S L E A R R(K)                | 127.98 | 553.9467 | 1659.826 | -0.0003 | -0.2  | 4.23 | 18080.7  | 7.92 | HUMAN | K7ELW0 | Protein Di-1                                                  |
| 16137 | dirMS_041712_NAR_50mM_plus.18863.18863.3   | 3 | 7.4  | 0 | 5.27E+05 M1m   | (-I)MDLPT(I)M(D)E(I)Q/LF/R/G/D T V L L(K)               | 166.78 | 598.6527 | 1777.952 | -0.0019 | -1.7  | 4.56 | 18601.1  | 5.1  | HUMAN | C9Z25  | Transitional endoplasmic reticulum ATPase (Fragment)          |
| 16138 | dirMS_041712_NAR_50mM_plus.20099.20099.3   | 3 | 7.4  | 0 | 5.38E+05       | (R)QADPTP(R)K(A)R P T Y A/T M I M L S/L K(L)            | 174.55 | 597.9962 | 1793.979 | -0.0045 | -2.5  | 9.99 | 150022.8 | 9.1  | HUMAN | E7E2V0 | Endoplasmic reticulum chaperone 70                            |
| 16139 | dirMS_041712_NAR_50mM_plus.20629.20629.3   | 3 | 7.4  | 0 | 4.37E+04       | (R)KSGAPN(K)K(L)P V V G L/V L(V)A(I)A/R(T)              | 107.41 | 635.7063 | 1965.43  | -0.0005 | -3.3  | 4.12 | 30379.2  | 4.9  | HUMAN | PT2905 | Inosine 5'-monophosphate dehydrogenase 2 (Fragment)           |
| 16140 | dirMS_041712_NAR_50mM_plus.6648.6648.3     | 3 | 7.4  | 0 | 3.80E+05       | (R)VDQGV(K)R(V)A/G/K/V/V/S E T D N(T)K                  | 103.3  | 502.2651 | 1504.785 | -0.0046 | -3    | 4.56 | 48057    | 5.34 | HUMAN | P05783 | Keratin, type I cytoskeletal 18                               |
| 16141 | dirMS_041712_NAR_50mM_plus.8950.8950.3     | 3 | 7.4  | 0 | 1.80E+05       | (K)TPVPEP(K)P T P E V(A)N/H(R)                          | 111.98 | 416.5627 | 1247.674 | -0.0007 | -0.6  | 5.37 | 5429.1   | 9.6  | HUMAN | ES8P1  | 40S ribosomal protein S20                                     |
| 16142 | dirMS_041712_NAR_50mM_plus.8955.8955.3     | 3 | 7.4  | 0 | 2.37E+04       | (R)GGSDGS(R)G(S)D S S S K P(V)D L N/Y E(L)              | 114.08 | 609.2765 | 1825.809 | -0.0063 | -3.5  | 4.03 | 113880.5 | 9.18 | HUMAN | P09874 | Poly [ADP-ribose] polymerase 1                                |
| 16143 | dirMS_041712_NAR_60mM_plus.12208.12208.3   | 3 | 7.4  | 0 | 1.32E+05       | (R)LNQGS(K)N(L)D/S/L(Q)T E Q R(R)                       | 120.47 | 515.286  | 1541.819 | -0.0019 | -1.3  | 6.07 | 33421.3  | 6.44 | HUMAN | P15204 | Desmoplakin                                                   |
| 16144 | dirMS_041712_NAR_60mM_plus.18916.18916.3   | 3 | 7.4  | 0 | 1.64E+05       | (R)NHNPLG(R)N H/P G L(L)A/D/Y(T)T R(K)                  | 106.68 | 505.6001 | 1514.778 | -0.0073 | -4.8  | 6.74 | 130372.9 | 6.37 | HUMAN | P11498 | Pyruvate carboxylase, mitochondrial                           |
| 16145 | dirMS_041712_NAR_120mM_minus.12755.12755.3 | 3 | 7.39 | 1 | 2.32E+05       | (R)NJKQEV(R)N K Q E V M(I)S D L L E E(R)L               | 123.53 | 530.9318 | 1590.779 | -0.0016 | -1    | 4.41 | 23493.8  | 5.45 | HUMAN | F8V1L3 | Myosin-10                                                     |
| 16146 | dirMS_041712_NAR_120mM_minus.14920.14920.2 | 2 | 7.39 | 0 | 7.65E+05       | (R)DWSHYH(R)D W(S)/N(Y)K(K)                             | 135    | 491.725  | 982.442  | -0.001  | -1    | 6.74 | 43773.3  | 5.26 | HUMAN | F8V729 | Keratin, type I cytoskeletal 18                               |
| 16147 | dirMS_041712_NAR_20mM_minus.11211.11212.2  | 2 | 7.39 | 0 | 1.10E+05 M316m | (R)ISEGFT(R)R(S)E Q/T/T A/R P(R)                        | 158.05 | 623.3005 | 1228.598 | -0.0054 | -0.4  | 6    | 42831.5  | 4.86 | HUMAN | A8K554 | HCC1953/53, isoform CRA_1                                     |
| 16148 | dirMS_041712_NAR_20mM_minus.14183.14183.3  | 3 | 7.39 | 1 | 6.62E+05       | (R)YKVEGR(R)E/V K P G V I(V)E/D S V L(V)R(K)            | 149.1  | 595.6534 | 1784.958 | -0.0118 | -6.6  | 4.68 | 56186.7  | 5.47 | HUMAN | B4D0UR | T-complex protein 1 subunit gamma                             |
| 16149 | dirMS_041712_NAR_50mM_minus.18170.18170.3  | 3 | 7.39 | 1 | 2.53E+05       | (K)KLKAEAL(K)K E A E L(L)E/L P M A R I(A)               | 172.67 | 574.9957 | 1722.982 | -0.0097 | -5.6  | 4.79 | 56164.6  | 6.01 | HUMAN | EP9P73 | Coatomer subunit beta (Fragment)                              |
| 16150 | dirMS_041712_NAR_60mM_minus.18316.18316.3  | 3 | 7.39 | 0 | 5.10E+05       | (R)EYFWS(R)E Y I S/W G E A Q I(H) V G K(K)              | 102.38 | 562.2608 | 1684.775 | -0.0076 | -4.5  | 5.4  | 56491.1  | 7.78 | HUMAN | B4D0G2 | Elongation factor 1-gamma                                     |
| 16151 | dirMS_041712_NAR_60mM_minus.2746.2746.3    | 3 | 7.39 | 1 | 5.37E+05       | (R)YLAVALA(R)Y/LA/E A/A G D D K(K)                      | 163.12 | 427.222  | 1279.653 | -0.0014 | -1.1  | 4.56 | 19186.1  | 4.48 | HUMAN | B04C26 | 14-3-3 protein zeta/delta                                     |
| 16152 | dirMS_041712_NAR_120mM_plus.7839.7839.3    | 3 | 7.39 | 1 | 2.90E+05       | (R)IADDEE(R)K(S)I E A D L P A/F(R)S                     | 94.67  | 481.986  | 1231.581 | -0.0002 | -0.1  | 4.56 | 163032.4 | 6.56 | HUMAN | U30490 | Eukaryotic translation initiation factor 3 subunit A          |
| 16153 | dirMS_041712_NAR_20mM_plus.10208.10208.3   | 3 | 7.39 | 0 | 1.21E+05 M282m | (R)MHNQPA(R)N H/P D A D A N M L/V(L)A/R(N)              | 143.32 | 483.2393 | 1415.311 | -0.009  | -1.0  | 5.84 | 65763.5  | 9.81 | HUMAN | Q9HC05 | Nuclear receptor coactivator 5                                |
| 16154 | dirMS_041712_NAR_20mM_plus.18359.18359.3   | 3 | 7.39 | 0 | 7.14E+04       | (K)TSEALL(K)T S E A L L V I T Q L V L(K)                | 198.2  | 514.9762 | 1542.91  | -0.0039 | -2.5  | 6    | 50425    | 5.53 | HUMAN | HYH27  | Cullin-associated NEDD8-dissociated protein 1 (Fragment)      |
| 16155 | dirMS_041712_NAR_20mM_plus.18973.18973.3   | 3 | 7.39 | 0 | 1.81E+05       | (K)TLTQD(K)T L E I T G A S/L G I V Q A A F A(K)         | 202.42 | 582.6516 | 1745.943 | -0.003  | -1.7  | 5.66 | 120546   | 7.82 | HUMAN | Q95486 | Protein transport protein Sec24A                              |
| 16156 | dirMS_041712_NAR_20mM_plus.19120.19120.3   | 3 | 7.39 | 0 | 1.45E+05       | (R)YKVEGR(R)E/V K P G V I(V)E/D S V L(V)R(K)            | 201.45 | 595.6534 | 1784.958 | -0.0118 | -6.6  | 4.68 | 56186.7  | 4.86 | HUMAN | B4D0UR | T-complex protein 1 subunit gamma                             |
| 16157 | dirMS_041712_NAR_20mM_plus.10365.10365.2   | 2 | 7.39 | 0 | 4.28E+05       | (R)QEWANS(K)Q I V A N S A F V I R(K)                    | 107.42 | 625.311  | 1249.617 | -0.0024 | -1.9  | 4.53 | 17664    | 8.77 | HUMAN | HOY6E4 | Heat shock protein HSP 90-beta (Fragment)                     |
| 16158 | dirMS_041712_NAR_30mM_plus.4266.4266.2     | 2 | 7.39 | 0 | 4.73E+05 M558m | (R)JNQR(N)M Q/V A N L E R(M)                            | 70.22  | 460.7158 | 904.311  | -0.0098 | -1.3  | 5.55 | 77799.7  | 9.09 | HUMAN | PS2272 | Heterogeneous nuclear ribonucleoprotein M                     |
| 16159 | dirMS_041712_NAR_30mM_plus.14603.14603.3   | 3 | 7.39 | 1 | 8.74E+04 S48s  | (K)YTKAKL(K)Y T A/N X L S I E I G H E Y(K)T             | 153.33 | 643.0301 | 1723.995 | -0.0308 | -0.6  | 6.73 | 11133.3  | 6.73 | HUMAN | C9I778 | BET1 homolog                                                  |
| 16160 | dirMS_041712_NAR_30mM_plus.10959.10959.3   | 3 | 7.39 | 0 | 1.94E+05 M282m | (R)IADDEE(R)K(S)I E A D L P A/F(R)S                     | 125.1  | 498.242  | 1231.581 | -0.0002 | -1.1  | 6.74 | 43773.3  | 9.15 | HUMAN | PT2905 | Eukaryotic translation initiation factor 3 subunit A          |
| 16161 | dirMS_041712_NAR_50mM_plus.12383.12383.3   | 3 | 7.39 | 1 | 2.49E+05       | (R)GYSPYF(R)E V I/S I P Y I N T K S G Q/K(K)            | 137.18 | 568.292  | 1702.88  | -0.0185 | -10.8 | 9.53 | 61224.7  | 5.7  | HUMAN | P10809 | 60 kDa heat shock protein, mitochondrial                      |
| 16162 | dirMS_041712_NAR_60mM_plus.18969.18969.3   | 3 | 7.39 | 1 | 2.62E+05       | (R)YKVEGR(R)E/V K P G V I(V)E/D S V L(V)R(K)            | 156.68 | 496.9628 | 1488.878 | -0.0046 | -3.1  | 8.5  | 482683.6 | 6.07 | HUMAN | Q12955 | Ankyrin-3                                                     |
| 16163 | dirMS_041712_NAR_60mM_plus.2156.2156.3     | 3 | 7.39 | 0 | 1.67E+05       | (R)KINGGLG(K)N G V G L V G I M M A N L V L S D L T L(Q) | 103.18 | 585.3126 | 1715.927 | -0.0033 | -1.9  | 6.74 | 26123.4  | 7.07 | HUMAN | EP9H29 | Thioredoxin-dependent peroxidoreductase, mitochondrial        |
| 16164 | dirMS_041712_NAR_60mM_plus.7161.7161.3     | 3 | 7.39 | 1 | 1.52E+07       | (R)IAAGAE(R)A/P P G A E A/F A/P N R(L)                  | 176.47 | 410.2195 | 1228.643 | -0.0007 | -0.5  | 8.79 | 43979.5  | 8.92 | HUMAN | FGY623 | Non-POU domain-containing octamer-binding protein             |
| 16165 | dirMS_041712_NAR_60mM_plus.10861.10861.2   | 2 | 7.38 | 0 | 1.62E+05       | (R)KIDQNP(R)R I/V N G P A/P K(K)                        | 145.23 | 597.8271 | 1194.648 | -0.0008 | -0.7  | 4.37 | 83605    | 4.97 | HUMAN | P08238 | Heat shock protein HSP 90-beta                                |
| 16166 | dirMS_041712_NAR_20mM_minus.14650.14650.2  | 2 | 7.38 | 0 | 5.20E+03       | (K)TLPPLP(K)T L P L F L A K(K)                          | 201.18 | 516.3086 | 1031.614 | -0.0036 | -3.5  | 5.66 | 83273.6  | 5.55 | HUMAN | P13101 | X-ray repair cross-complementing protein 5                    |
| 16167 | dirMS_041712_NAR_30mM_minus.11543.11543.2  | 2 | 7.38 | 0 | 2.45E+04       | (R)YFSASGE(K)S I A S G L E G L N G N I(X)L              | 116.38 | 647.3253 | 1293.643 | 0       | 0     | 6    | 29110.6  | 4.57 | HUMAN | P12004 | Proliferating cell nuclear antigen                            |
| 16168 | dirMS_041712_NAR_30mM_minus.8078.8078.2    | 2 | 7.38 | 0 | 4.16E+05       | (R)YFSEAE(K)S I S V S E A I(K)                          | 97.97  | 455.7458 | 910.488  | -0.0037 | -4.1  | 6    | 150022.8 | 9.1  | HUMAN | E7E2V0 | Endoplasmic reticulum chaperone 70                            |
| 16169 | dirMS_041712_NAR_30mM_minus.811.811.2      | 2 | 7.38 | 0 | 3.83E+05       | (R)YFSEAE(K)S I S V S E A I(K)                          | 98.32  | 455.7458 | 910.488  | -0.0037 | -4.1  | 6.74 | 43773.3  | 5.26 | HUMAN | F8V729 | Keratin, type I cytoskeletal 18                               |
| 16170 | dirMS_041712_NAR_40mM_minus.6916.6916.2    | 2 | 7.38 | 0 | 6.99E+04 M239m | (K)ETFAAL(K)E I T A V L A N Y S T M(K)                  | 111.13 | 589.304  | 1161.618 | -0.0093 | -1.5  | 6.1  | 32616.5  | 5.18 | HUMAN | AN6176 | Actin, alpha skeletal muscle                                  |
| 16171 | dirMS_041712_NAR_50mM_minus.13027.13027.3  | 3 | 7.38 | 1 | 1.05E+06 M320m | (K)YMAJCC(K)M A C C L L Y R G D V V P(K)                | 141.47 | 620.9644 | 1844.886 | -0.0093 | -1.1  | 8.49 | 50706.6  | 5.68 | HUMAN | AN6H12 | Tubulin alpha chain-like 3                                    |
| 16172 | dirMS_041712_NAR_50mM_minus.10583.10583.3  | 3 | 7.38 | 0 | 2.57E+05       | (R)YSVHSLA(R)S V I H S L A S L A V E A I(K)             | 119.02 | 456.9195 | 1368.748 | -0.0042 | -3.1  | 6.47 | 183049.2 | 5.32 | HUMAN | Q9G2U2 | Paternally-expressed gene 3 protein                           |
| 16173 | dirMS_041712_NAR_120mM_minus.14952.14952.2 | 2 | 7.38 | 0 | 3.41E+05       | (R)DWSHYH(R)D W(S)/N(Y)K(K)                             | 132.02 | 491.725  | 982.442  | -0.001  | -1    | 6.74 | 43773.3  | 5.26 | HUMAN | F8V729 | Keratin, type I cytoskeletal 18                               |
| 16174 | dirMS_041712_NAR_20mM_plus.12860.12860.2   | 2 | 7.38 | 0 | 3.37E+05       | (K)KLEKAEAL(K)S L E A L L Q/T E Q R(R)                  | 161.72 | 565.3132 | 1129.621 | -0.002  | -1.8  | 4.53 | 56607.4  | 5.37 | HUMAN | F8V804 | Keratin, type I cytoskeletal 8                                |
| 16175 | dirMS_041712_NAR_40mM_plus.12061.12061.3   | 3 | 7.38 | 0 | 6.05E+04 T300t | (R)LLAGHS(R)R L A G I Q D S F E I V I R(E)              | 137.88 | 605.0257 | 1789.969 | -0.0031 | -6.9  | 4.14 | 224045.8 | 7.24 | HUMAN | Q6ZM73 | Echinoderm microtubule-associated protein-like 6              |
| 16176 | dirMS_041712_NAR_50mM_plus.16805.16805.3   | 3 | 7.38 | 1 | 1.87E+05 M132m | (R)TALAEIA(R)T/LA/E I/V A/K E/L D/N M P L R G K(K)      | 155.92 | 610.3302 | 1812.989 | -0.0093 | -4.2  | 4.68 | 23729.5  | 9.88 | HUMAN | C9Z17  | Non-POU domain-containing octamer-binding protein (Fragment)  |
| 16177 | dirMS_041712_NAR_50mM_plus.17417.17417.3   | 3 | 7.38 | 0 | 4.75E+05       | (R)DLSHSD(R)R L I S H D E I M F S Y I Y(R)              | 160.08 | 571.5992 | 1712.784 | -0.0006 | -0.3  | 4.22 | 19709.1  | 4.83 | HUMAN | P13093 | Translational-controlling tumor protein                       |

|       |                                            |   |      |                 |                                                             |        |          |          |         |       |      |          |             |        |                                                             |
|-------|--------------------------------------------|---|------|-----------------|-------------------------------------------------------------|--------|----------|----------|---------|-------|------|----------|-------------|--------|-------------------------------------------------------------|
| 16237 | dirMS_041712_NAR_50mM_minus.7062.7062.3    | 3 | 7.35 | 0.209E+05       | (KIVSYGGG(K)S)V(S)G I G D E H Q Q G R V I                   | 106.65 | 564.249  | 1690.73  | 0.0021  | 1.3   | 4.17 | 19395.5  | 858 HUMAN   | GV3359 | DNA-(apurinic or apyrimidinic site) lyase (Fragment)        |
| 16238 | dirMS_041712_NAR_60mM_minus.7576.7576.3    | 3 | 7.35 | 1.182E+05       | (KIDSLDE(K)S)I K L V D D/S D E K                            | 101.43 | 431.588  | 1292.597 | 0.0004  | 4.2   | 4.04 | 6116.1   | 5.2 HUMAN   | FSH06  | Cullin-associated NEDD8-dissociated protein 1 (Fragment)    |
| 16239 | dirMS_041712_NAR_120mM_plus.15184.15184.4  | 3 | 7.35 | 1.145E+05       | (KIDSLDE(K)S)I P A R D E V D D/S D E K                      | 101.43 | 431.588  | 1292.597 | 0.0004  | 4.2   | 4.04 | 6116.1   | 5.2 HUMAN   | FSH06  | Cullin-associated NEDD8-dissociated protein 1 (Fragment)    |
| 16240 | dirMS_041712_NAR_20mM_plus.10413.10413.2   | 2 | 7.35 | 0.109E+05 M267m | (KIDSLDE(K)S)I V L I/E E E M T K Y I                        | 145.1  | 611.875  | 1206.629 | 15.9994 | 3.4   | 4.25 | 51524.1  | 4.82 HUMAN  | FSH06  | Interleukin enhancer-binding factor 2                       |
| 16241 | dirMS_041712_NAR_20mM_plus.10987.10987.2   | 2 | 7.35 | 0.128E+05       | (KILAEAE(K)S)I K L A E Y/V V T K I S I                      | 148.33 | 468.7674 | 936.54   | -0.0125 | -13.4 | 6    | 23650.8  | 9.06 HUMAN  | E7U0A9 | Noron navigator 3                                           |
| 16242 | dirMS_041712_NAR_20mM_plus.11144.11144.2   | 2 | 7.35 | 0.122E+05       | (KITVTVET(K)S)I V V F/V F V K P I R I                       | 148.37 | 468.7674 | 936.54   | -0.0125 | -13.4 | 5.66 | 61018.6  | 9.44 HUMAN  | BADUW8 | Probable ATP-dependent RNA helicase DDX5                    |
| 16243 | dirMS_041712_NAR_20mM_plus.15358.15358.3   | 3 | 7.35 | 0.539E+05       | (KIVGNYE(K)S)I E V I Q D P P V V V P G D G L A K I          | 178.02 | 598.994  | 1824.985 | -0.0027 | -4.1  | 5.8  | 49596.3  | 4.9 HUMAN   | ADN051 | Tubulin beta-gamma-4A chain                                 |
| 16244 | dirMS_041712_NAR_20mM_plus.15741.15741.2   | 2 | 7.35 | 0.111E+05       | (KISLVPVY(K)S)I L V F V P T S A P R I G I                   | 180.28 | 594.3403 | 1187.678 | -0.005  | -4.2  | 4.47 | 92752.5  | 4.76 HUMAN  | PI4625 | Endoplasmic                                                 |
| 16245 | dirMS_041712_NAR_20mM_plus.8206.8206.2     | 2 | 7.35 | 0.106E+05       | (KIVTEDTS(K)S)I E T D T S S V I R I G I                     | 126.02 | 553.7889 | 1106.569 | 0.0017  | 1.6   | 4.37 | 80685.1  | 7.31 HUMAN  | POS165 | Propionyl-CoA carboxylase alpha chain, mitochondrial        |
| 16246 | dirMS_041712_NAR_30mM_plus.17125.17125.2   | 2 | 7.35 | 0.272E+05       | (KIVCGNK(K)S)I C G N F R I G P C E L V R I                  | 146.25 | 697.3237 | 1393.635 | 0.005   | 3.6   | 6.05 | 37681.5  | 5.93 HUMAN  | DFR6E2 | Phosphoribosylaminimidazole carboxylase                     |
| 16247 | dirMS_041712_NAR_30mM_plus.2184.2184.2     | 2 | 7.35 | 0.809E+04       | (KIVGKQ(K)S)I K V Q L V L I D S N F I R S I Q I             | 169.52 | 738.3989 | 1475.796 | -0.006  | -4.1  | 9.75 | 36914.7  | 6.33 HUMAN  | PI4550 | Alcohol dehydrogenase [NADP+]                               |
| 16248 | dirMS_041712_NAR_30mM_plus.6208.6208.2     | 2 | 7.35 | 3.888E+05       | (KIDGQNP(K)S)I Q V L Q V I Q I Q I Q I Q I                  | 142.8  | 496.733  | 992.46   | -0.0004 | -1.4  | 4.2  | 28545.1  | 6.718 HUMAN | KT489  | Alcohol dehydrogenase (Fragment)                            |
| 16249 | dirMS_041712_NAR_50mM_plus.14088.14088.3   | 3 | 7.35 | 1.439E+05       | (RINIVFP(K)S)I R N V F V P P V A E L K I Q I                | 142.28 | 462.604  | 1385.815 | -0.0015 | -1.1  | 8.59 | 23167    | 8.94 HUMAN  | BIAP8B | 6-phosphofructokinase type C                                |
| 16250 | dirMS_041712_NAR_50mM_plus.15730.15730.3   | 3 | 7.35 | 1.742E+05       | (RIJTAGSA(K)S)I A V T G S A L A D I A M A K R N I           | 150.28 | 473.2658 | 1417.783 | -0.0003 | -0.2  | 8.79 | 17656.4  | 11.01 HUMAN | CJN1W5 | 60S ribosomal protein L24                                   |
| 16251 | dirMS_041712_NAR_50mM_plus.20467.20467.3   | 3 | 7.35 | 1.187E+05       | (KIVYNNK(K)S)I Y L N M D A I M E A N I K T R I              | 176.7  | 542.9473 | 1626.823 | 0.0004  | 2.7   | 5.79 | 80685.1  | 7.31 HUMAN  | POS165 | Propionyl-CoA carboxylase alpha chain, mitochondrial        |
| 16252 | dirMS_041712_NAR_60mM_plus.11841.11841.3   | 3 | 7.35 | 0.922E+05       | (RIFAGHTV(K)S)I A Q H Q T E V V E V S Q R V N I             | 118.63 | 581.565  | 1176.782 | -0.0015 | -0.9  | 5.4  | 26419.2  | 5.1 HUMAN   | HOY9K7 | Serpin, type I; cyclotactin-8 (Fragment)                    |
| 16253 | dirMS_041712_NAR_60mM_plus.11999.11999.3   | 3 | 7.35 | 1.564E+05       | (RIFSAAL(K)S)I R F S A L I Q Q V A L P T E S T D M R N I    | 115.47 | 640.654  | 1919.957 | -0.0045 | -5.9  | 6.07 | 176357.7 | 5.25 HUMAN  | DD3NT2 | Eukaryotic translation initiation factor 4 gamma 1          |
| 16254 | dirMS_041712_NAR_20mM_minus.10700.10700.3  | 3 | 7.34 | 1.40E+05        | (KIVNIGQ(K)S)I V N Q I G S V I T E S I Q A C A N I I        | 155.38 | 545.2807 | 1633.821 | 0.0062  | 3.8   | 5.97 | 47328.4  | 7.76 HUMAN  | PI3929 | Beta-enolase                                                |
| 16255 | dirMS_041712_NAR_20mM_minus.13193.13193.2  | 2 | 7.34 | 0.238E+04 M329m | (KJALLNM(K)S)I L I E I L N M L S I K I G I                  | 183.02 | 574.3232 | 1131.644 | 15.9549 | 9     | 6.05 | 40821.3  | 7.79 HUMAN  | OY9167 | Phosphoserine aminotransferase                              |
| 16256 | dirMS_041712_NAR_30mM_minus.14367.14367.2  | 2 | 7.34 | 0.240E+05       | (KICSSAF(K)S)I G S G A I I V F I P T R I G I                | 131.97 | 511.3188 | 1221.633 | -0.0027 | -2.2  | 8.75 | 58506.4  | 6.38 HUMAN  | PI4618 | Pyruvate kinase isozymes M1/M2                              |
| 16257 | dirMS_041712_NAR_30mM_minus.19005.19005.2  | 2 | 7.34 | 0.233E+05       | (KIMALML(K)S)I M L I Q /W N K I E I                         | 158.23 | 474.2745 | 947.542  | 0.0001  | 0.1   | 8.5  | 90316.8  | 5.52 HUMAN  | Q13263 | Transcription intermediary factor 1-beta                    |
| 16258 | dirMS_041712_NAR_50mM_minus.10289.10289.3  | 3 | 7.34 | 0.166E+05       | (KJLQAEF(K)S)I Q L A E A P H I V V I G T P G R I G I        | 127.08 | 515.6179 | 1544.854 | -0.0152 | -9.8  | 6.75 | 41517.9  | 5.45 HUMAN  | E7EQG2 | Eukaryotic initiation factor 4A-II                          |
| 16259 | dirMS_041712_NAR_50mM_minus.8949.8949.3    | 3 | 7.34 | 0.236E+05       | (RIVMLED(K)S)I R V M L E G T /E P N D A D S K P G T R I G I | 118.3  | 595.9744 | 1785.916 | -0.0097 | -4.3  | 6.04 | 15431.7  | 9 HUMAN     | E7E9D  | Nucleoside diphosphate kinase A                             |
| 16260 | dirMS_041712_NAR_50mM_minus.13463.13463.3  | 3 | 7.34 | 1.304E+05       | (KIVSFDL(K)S)I V S F D L N A Q P K I G I                    | 135.1  | 426.9025 | 1275.694 | -0.0014 | -1.1  | 6.07 | 13579.2  | 9.99 HUMAN  | HTP046 | Thymidine nuclear protein 1 (Fragment)                      |
| 16261 | dirMS_041712_NAR_20mM_plus.14383.14383.3   | 3 | 7.34 | 1.08E+05 M174m  | (KIVAGAM(K)S)I M G A Q V A L V I L S A T R I A I            | 171.1  | 535.9457 | 1589.832 | 0.0001  | 0.5   | 5.88 | 38656.1  | 8.58 HUMAN  | HOY44  | Sorbitol dehydrogenase                                      |
| 16262 | dirMS_041712_NAR_20mM_plus.14548.14548.2   | 2 | 7.34 | 0.389E+04 M185m | (KIVLWAM(K)S)I W A M V P P F R I L R I                      | 172.75 | 580.3169 | 1143.634 | 15.9922 | 2.3   | 9.75 | 42230.8  | 4.77 HUMAN  | AN6N28 | Putative tubulin beta chain-like protein ENSP0000290377     |
| 16263 | dirMS_041712_NAR_20mM_plus.9717.9717.3     | 3 | 7.34 | 0.823E+04       | (RITQDAPR(K)S)I P P Q A P A S V A L N V G P R I S I         | 138.37 | 460.2573 | 1378.744 | 0.1136  | 9.9   | 9.41 | 300551.7 | 12.1 HUMAN  | OUQ035 | Serine/arginine repetitive matrix protein 2                 |
| 16264 | dirMS_041712_NAR_30mM_plus.21886.21886.2   | 2 | 7.34 | 0.221E+05       | (RINSLGAK(K)S)I S L I L I Q V L V D Q S A R I A I           | 170.18 | 707.8889 | 1414.765 | 0.0057  | 4     | 5.84 | 15111    | 6.44 HUMAN  | BAD6E4 | Programmed cell death protein 5                             |
| 16265 | dirMS_041712_NAR_30mM_plus.28136.28136.3   | 3 | 7.34 | 3.245E+05       | (KIVLWAM(K)S)I W A M V P P F R I L R I                      | 172.75 | 580.3169 | 1143.634 | 15.9922 | 2.3   | 9.75 | 42230.8  | 4.77 HUMAN  | AN6N28 | Putative tubulin beta chain-like protein ENSP0000290377     |
| 16266 | dirMS_041712_NAR_30mM_plus.8535.8535.2     | 2 | 7.34 | 0.893E+05       | (RILSGE(K)S)I R L G A V G E A E K I S I                     | 96.92  | 501.7639 | 1002.51  | 0.0103  | 10.3  | 4.25 | 40996.8  | 9.24 HUMAN  | CJN1W9 | Regulator of chromosome condensation (Fragment)             |
| 16267 | dirMS_041712_NAR_40mM_plus.15822.15822.3   | 3 | 7.34 | 1.85E+05        | (KIVAVK(K)S)I A V V K P P G V M E I V L N K I E I           | 150.65 | 569.6778 | 1707.024 | -0.0049 | -2.9  | 8.56 | 73146.9  | 9.45 HUMAN  | EP9121 | Hypoxia up-regulated protein 1 (Fragment)                   |
| 16268 | dirMS_041712_NAR_40mM_plus.5460.5460.2     | 2 | 7.34 | 0.324E+04       | (RIVYQVC(K)S)I Y V Q V I Q V R I G I                        | 88.93  | 450.2218 | 899.437  | -0.0007 | -0.7  | 8.59 | 37238.2  | 5.57 HUMAN  | E7ELX4 | Ferrochelatase, mitochondrial (Fragment)                    |
| 16269 | dirMS_041712_NAR_50mM_plus.16339.16339.3   | 3 | 7.34 | 0.219E+05 M277m | (RIGLSDL(K)S)I L S D L V L S A L V I A M E K I A I          | 155.63 | 558.6162 | 1459.517 | 15.9925 | -2.1  | 5.32 | 26619.2  | 6.52 HUMAN  | OY9190 | ATP-dependent RNA helicase DDX39A                           |
| 16270 | dirMS_041712_NAR_50mM_plus.11145.11145.3   | 3 | 7.34 | 1.314E+05       | (RIGLDIAR(K)S)I R L D R I A G V Q V I A A N K I I           | 126.77 | 481.2661 | 1441.776 | 0.008   | 5.5   | 5.96 | 16560.2  | 10.31 HUMAN | PI3919 | 40S ribosomal protein S19                                   |
| 16271 | dirMS_041712_NAR_50mM_plus.13862.13862.3   | 3 | 7.34 | 0.145E+06       | (KJLDIAG(K)S)I L D I A G C /H G A C I N V K I I             | 140.48 | 641.9061 | 1383.705 | -0.0012 | -0.8  | 6.74 | 45578.2  | 7.83 HUMAN  | BADFL1 | Isocitrate dehydrogenase [NADP]                             |
| 16272 | dirMS_041712_NAR_60mM_plus.18226.18226.3   | 3 | 7.34 | 6.334E+05       | (KJLSDAR(K)S)I L I D L V K V E L V S V L Q V I              | 153.47 | 619.4025 | 1556.864 | -0.0026 | -1.7  | 4.56 | 10815.7  | 10.76 HUMAN | FZ2388 | 60S ribosomal protein L35                                   |
| 16273 | dirMS_041712_NAR_60mM_plus.5868.5868.3     | 3 | 7.34 | 1.835E+04       | (KJLSSAT(K)S)I L I S S V T A P D T K R I G I                | 88.43  | 455.226  | 1363.663 | 0.0     | 0     | 8.75 | 128523.4 | 7.02 HUMAN  | HT2200 | Protein transport protein Sec31A                            |
| 16274 | dirMS_041712_NAR_20mM_plus.7324.7324.2     | 2 | 7.33 | 1.376E+05 M328m | (KIVLWAM(K)S)I W A M V P P F R I L R I                      | 120.6  | 460.7411 | 904.481  | 15.9941 | -0.9  | 4.37 | 41827.5  | 9.48 HUMAN  | HTP046 | Thymidine nuclear protein 1 (Fragment)                      |
| 16275 | dirMS_041712_NAR_20mM_minus.9470.9470.3    | 3 | 7.33 | 0.118E+04 M175m | (RILGGQ(K)S)I E G G Q A /D I L M P A Q K I I                | 145.4  | 558.2764 | 1656.826 | 15.9975 | 1.5   | 4.03 | 20033.9  | 6.24 HUMAN  | HOY60G | Creatine kinase B-type (Fragment)                           |
| 16276 | dirMS_041712_NAR_30mM_minus.14334.14334.2  | 2 | 7.33 | 0.220E+05       | (RIELAFQ(K)S)I R L A F Q /S I K E I                         | 131.8  | 468.2614 | 935.52   | -0.0041 | -4.4  | 6.1  | 30944.2  | 6.52 HUMAN  | BIQ2N1 | ATP-dependent RNA helicase DDX39A                           |
| 16277 | dirMS_041712_NAR_40mM_minus.9364.9364.2    | 2 | 7.33 | 0.131E+05       | (KIVASLA(K)S)I Q L A S A L N M T P /T T G H A E T K Q I     | 137.35 | 504.0087 | 1960.013 | -0.0019 | -1    | 6.72 | 11802.2  | 5.6 HUMAN   | DRR0G3 | Transcription factor BT73 (Fragment)                        |
| 16278 | dirMS_041712_NAR_50mM_minus.18277.18277.3  | 3 | 7.33 | 1.005E+05       | (RIVLSDL(K)S)I L S D L V L S A L V I A M E K I A I          | 171.78 | 528.3232 | 1459.517 | 15.9925 | -2.1  | 5.32 | 26619.2  | 6.52 HUMAN  | OY9190 | ATP-dependent RNA helicase DDX39A                           |
| 16279 | dirMS_041712_NAR_50mM_minus.4914.4914.3    | 3 | 7.33 | 4.133E+05       | (RUAJDAE(K)S)I A E D D E D D V D T V K I G I                | 82.37  | 532.5522 | 1565.645 | -0.0029 | -1.8  | 3.76 | 14366.2  | 7.31 HUMAN  | AR2101 | Thymosin alpha 1                                            |
| 16280 | dirMS_041712_NAR_60mM_minus.13396.13396.3  | 3 | 7.33 | 1.517E+05       | (RILQREY(K)S)I R L E R E V Q /E L M N V N I K I             | 150.08 | 475.6103 | 1353.005 | -0.0042 | -2.7  | 6.14 | 56674.8  | 5.37 HUMAN  | F8VX4B | Keratin, type II cytoskeletal 8                             |
| 16281 | dirMS_041712_NAR_120mM_plus.20195.20195.4  | 4 | 7.33 | 1.315E+05       | (RIRIDLSA(K)S)I R I D L S A L N L P R G I D R I K I         | 195.27 | 456.5157 | 1823.05  | -0.0088 | -4.8  | 6.04 | 44954.5  | 8.44 HUMAN  | AKB323 | 26S protease regulatory subunit 8                           |
| 16282 | dirMS_041712_NAR_20mM_plus.10217.10217.2   | 2 | 7.33 | 0.956E+04       | (KIVSFDL(K)S)I V S F D L N A Q P K I G I                    | 143.43 | 533.2299 | 1065.557 | -0.0054 | -5    | 4.5  | 43773.3  | 5.26 HUMAN  | F8V219 | Keratin, type I cytoskeletal 18                             |
| 16283 | dirMS_041712_NAR_20mM_plus.17364.17364.3   | 3 | 7.33 | 0.171E+05 M90m  | (RIVLSDL(K)S)I L S D L V L S A L V I A M E K I A I          | 194.48 | 625.9762 | 1850.921 | 15.9933 | -0.9  | 4    | 23729.5  | 9.89 HUMAN  | CJN172 | Non-KO domain-containing octamer-binding protein (Fragment) |
| 16284 | dirMS_041712_NAR_20mM_plus.17798.17798.2   | 2 | 7.33 | 1.59E+05        | (KIGVADFI(K)S)I G A D F V L V P D I E E E M G I S K I G I   | 194.95 | 890.4414 | 1779.876 | -0.0004 | -0.2  | 4.14 | 30947.9  | 6.47 HUMAN  | AKB3Q4 | Pyruvate kinase                                             |
| 16285 | dirMS_041712_NAR_30mM_plus.16934.16934.2   | 2 | 7.33 | 2.63E+05        | (RIVFLSQ(K)S)I R V L I S Q A D I L I I I                    | 141.48 | 575.3104 | 1149.615 | -0.0015 | -1.3  | 4.37 | 41053.3  | 5.58 HUMAN  | O8GUV0 | TNDC3 protein                                               |
| 16286 | dirMS_041712_NAR_30mM_plus.4869.4869.2     | 2 | 7.33 | 0.309E+05 M71m  | (RIVFLSQ(K)S)I R V L I S Q A D I L I I I                    | 77.37  | 555.2489 | 1093.494 | 15.9932 | -2.4  | 4.37 | 48845.9  | 4.72 HUMAN  | CAAM86 | Keratin, type I cuticular Ha5                               |
| 16287 | dirMS_041712_NAR_40mM_plus.12673.12673.3   | 3 | 7.33 | 0.566E+05       | (RIVFLSQ(K)S)I R V L I S Q A D I L I I I                    | 157.05 | 565.6098 | 1684.813 | 0.0016  | 0.9   | 6.74 | 30944.2  | 6.52 HUMAN  | BIQ2N1 | ATP-dependent RNA helicase DDX39A                           |
| 16288 | dirMS_041712_NAR_120mM_minus.18769.18769.4 | 4 | 7.32 | 1.442E+05       | (KIVQFPM(K)S)I Q P I P P N A E L K Y E V L H I K I S I      | 167.85 | 48       |          |         |       |      |          |             |        |                                                             |





|       |                                             |   |      |   |                |                                                        |        |          |          |         |       |      |          |       |       |        |                                                                                                            |
|-------|---------------------------------------------|---|------|---|----------------|--------------------------------------------------------|--------|----------|----------|---------|-------|------|----------|-------|-------|--------|------------------------------------------------------------------------------------------------------------|
| 16564 | dirMS_D41712_NAR_30mM_minus1.18050.18050.2  | 2 | 7.21 | 0 | 4.01E+05       | (R)IGFRD(R)G L(F)I/D(K)G                               | 15342  | 460.7585 | 920.509  | 0.001   | 1     | 4.21 | 18498.6  | 5.82  | HUMAN | H7C374 | Peroxisidoxin-4 (Fragment)                                                                                 |
| 16565 | dirMS_D41712_NAR_40mM_minus1.14249.14249.3  | 3 | 7.21 | 0 | 1.90E+04       | (R)YSAAV(R)SVA/LV/LP/L/H/P/L/H/E/G/L/R/A               | 16798  | 590.0205 | 1768.048 | -0.001  | -0.6  | 6.7  | 63124.2  | 9.53  | HUMAN | E7EVU5 | Nuclear receptor corepressor 1 (Fragment)                                                                  |
| 16566 | dirMS_D41712_NAR_50mM_minus1.11218.11218.3  | 3 | 7.21 | 0 | 5.57E+03       | (R)USGMP(R)R V G T A V L D P A V L V R R               | 132    | 460.9013 | 1230.212 | -0.005  | -1.7  | 4.2  | 3820.2   | 1.7   | HUMAN | HSJG15 | Splignic factor 3B subunit 2                                                                               |
| 16567 | dirMS_D41712_NAR_20mM_plus1.15487.15487.3   | 3 | 7.21 | 0 | 2.99E+05 M18m  | (R)AGKVP(R)R A G K P V A C T A G V L S E M A(K)K       | 105.8  | 631.6612 | 1876.969 | 15.9997 | 2.5   | 8.64 | 18466.1  | 5.78  | HUMAN | H3BSU3 | Pyruvate kinase (Fragment)                                                                                 |
| 16568 | dirMS_D41712_NAR_50mM_minus1.18362.18362.3  | 3 | 7.21 | 0 | 4.62E+05       | (K)JAEEL(R)K A L V E Q/L Q P L I E A H Q Q A(R)        | 176.2  | 610.0139 | 1801.033 | -0.0059 | -3.3  | 5.4  | 53506.8  | 5.83  | HUMAN | P13281 | Tryptophan-tRNA ligase, cytoplasmic                                                                        |
| 16569 | dirMS_D41712_NAR_60mM_minus1.1994.11994.3   | 3 | 7.21 | 1 | 2.62E+05       | (R)IGMG(R)G L A G L G D V A E V R R(K)                 | 125.95 | 428.9126 | 1284.727 | -0.0038 | -2.9  | 6.07 | 97378.8  | 6.4   | HUMAN | P12116 | Glycogen phosphorylase, brain form                                                                         |
| 16570 | dirMS_D41712_NAR_30mM_minus1.15183.15183.3  | 3 | 7.21 | 1 | 3.39E+05       | (K)KAEGL(R)K A K L E L E L V G V A R(K)                | 144.37 | 506.9421 | 1518.816 | -0.0045 | -3    | 4.3  | 2209.9   | 4.94  | HUMAN | H9YD1  | Plectin (Fragment)                                                                                         |
| 16571 | dirMS_D41712_NAR_60mM_plus1.6793.16793.3    | 3 | 7.21 | 1 | 2.85E+05       | (R)IGSPT(R)S Q L I F S T E L E A V E V K(R)N           | 153.23 | 569.9569 | 1707.855 | 0.0013  | 0.8   | 4.1  | 14409.9  | 6.01  | HUMAN | ER887  | Clastrin heavy chain 2                                                                                     |
| 16572 | dirMS_D41712_NAR_120mM_plus1.5386.5386.3    | 3 | 7.21 | 1 | 7.52E+04       | (R)JSGGG(R)S Q/G/G/N F/G/N K R(K)                      | 81.23  | 449.8829 | 1347.64  | -0.0059 | -4.3  | 8.75 | 58856.7  | 6.26  | HUMAN | QBWX1  | Paraspeckle component 1                                                                                    |
| 16573 | dirMS_D41712_NAR_20mM_plus1.4758.14758.2    | 2 | 7.21 | 0 | 2.03E+05 M73m  | (R)IAVUL(R)R A V L V L E P G T D S V R(K)              | 175.2  | 809.4082 | 1601.82  | 15.9888 | -3.8  | 4.03 | 13112.4  | 5.23  | HUMAN | FR813  | Tubulin beta-8 chain                                                                                       |
| 16574 | dirMS_D41712_NAR_20mM_plus1.1696.1696.2     | 2 | 7.21 | 0 | 1.13E+05       | (R)IAFMTA(R)I A V L T A P T A A(K)                     | 185.77 | 474.2987 | 1497.592 | -0.0023 | -2.4  | 8.75 | 17718.4  | 10.99 | HUMAN | FR229  | 40S ribosomal protein S18                                                                                  |
| 16575 | dirMS_D41712_NAR_20mM_plus1.1831.1831.2     | 2 | 7.21 | 0 | 2.71E+04       | (R)ISSQPS(R)S P L S T A V L V P P G A R(K)             | 109.6  | 487.9553 | 1347.5   | -0.0027 | -0.9  | 9.47 | 91324.5  | 9.87  | HUMAN | Q8939  | Heterogeneous nuclear ribonucleoprotein U                                                                  |
| 16576 | dirMS_D41712_NAR_30mM_plus1.1040.1040.2     | 2 | 7.21 | 0 | 2.95E+05       | (R)ISLSPS(R)S L I S Y P V E R(K)                       | 108.27 | 519.2668 | 1037.526 | 0.0001  | 0.1   | 5.72 | 9057.8   | 12.09 | HUMAN | 13L4U6 | Serine/arginine repetitive matrix protein 2 (Fragment)                                                     |
| 16577 | dirMS_D41712_NAR_30mM_plus1.1612.1612.2     | 2 | 7.21 | 0 | 6.56E+05       | (K)GVLPY(R)G V L I F Y G P P G C G K(K)T               | 137.93 | 626.3175 | 1251.619 | 0.0087  | 6.9   | 8.59 | 90004.9  | 5.14  | HUMAN | PS5072 | Transitional endoplasmic reticulum ATPase                                                                  |
| 16578 | dirMS_D41712_NAR_30mM_plus1.1735.1735.2     | 2 | 7.21 | 0 | 8.32E+04       | (K)YVFLA(R)K V I F Q I L N A A(K)                      | 143.97 | 483.7736 | 966.541  | -0.0008 | -0.8  | 8.72 | 17656.4  | 11.01 | HUMAN | C9JN05 | 60S ribosomal protein L24                                                                                  |
| 16579 | dirMS_D41712_NAR_30mM_plus1.2035.1054.2     | 2 | 7.21 | 0 | 1.91E+05       | (K)IGLGN(K)G L V E A L I R L(K)                        | 161.5  | 591.8929 | 1198.679 | -0.0069 | -5.7  | 4.53 | 6141.3   | 1.74  | HUMAN | P10355 | 60 kDa SS-A/Ribonucleoprotein                                                                              |
| 16580 | dirMS_D41712_NAR_30mM_plus1.9118.9118.2     | 2 | 7.21 | 0 | 2.25E+05       | (R)JALLE(R)I A L R I E L G E R(K)                      | 101.35 | 494.2566 | 987.511  | -0.0046 | -4.7  | 4.25 | 67933    | 6.08  | HUMAN | P26038 | Moesin                                                                                                     |
| 16581 | dirMS_D41712_NAR_40mM_plus1.13456.13456.3   | 3 | 7.21 | 0 | 9.16E+03       | (K)MVMG(R)K M V M Q I D G D P L T G A D K P L R(K)     | 145.45 | 647.0084 | 1939.014 | -0.0033 | -1.7  | 5.71 | 61981.6  | 8.97  | HUMAN | QB624  | Far upstream element-binding protein 3                                                                     |
| 16582 | dirMS_D41712_NAR_20mM_plus1.9010.9010.2     | 2 | 7.21 | 0 | 6.13E+04       | (K)QEFAP(R)K E D A P F S I R M(K)                      | 114.47 | 425.7237 | 850.442  | -0.0016 | -1.9  | 6    | 134221.3 | 6.44  | HUMAN | P19524 | Desmoplakin                                                                                                |
| 16583 | dirMS_D41712_NAR_50mM_plus1.15443.15443.3   | 3 | 7.21 | 1 | 9.72E+05       | (R)IRYGV(R)R V K V P T A V L D E D I T G P T R(K)      | 149.82 | 550.0048 | 1948.002 | -0.0024 | -1.2  | 4.32 | 88568.3  | 5.77  | HUMAN | 84D226 | Fragile X mental retardation syndrome-related protein 1                                                    |
| 16584 | dirMS_D41712_NAR_50mM_plus1.17978.17978.3   | 3 | 7.21 | 0 | 2.80E+05       | (R)JFNGA(R)R F G N Q A D H P L D A S I L A F A K(L)    | 162.53 | 574.9575 | 1722.86  | -0.0019 | -1.1  | 7.14 | 44111.4  | 9.19  | HUMAN | Q9H448 | UDP-glucose protein O-fucosyltransferase 1                                                                 |
| 16585 | dirMS_D41712_NAR_50mM_plus1.19139.19139.3   | 3 | 7.21 | 0 | 5.40E+05       | (K)JHLQAP(K)H L Q A P L D Q A L E I L Q A L R(F)       | 169.5  | 644.3484 | 1931.035 | -0.0039 | -2    | 4.54 | 87447.6  | 6.44  | HUMAN | Q15437 | Protein transport protein Sec23B                                                                           |
| 16586 | dirMS_D41712_NAR_50mM_plus1.20874.20874.3   | 3 | 7.21 | 0 | 6.20E+05       | (R)IHLFM(R)H V F M P P G A P L A L T S R(K)            | 179.62 | 540.9498 | 1620.835 | -0.0007 | -0.4  | 9.75 | 42230.8  | 4.77  | HUMAN | AN6K28 | Putative tubulin beta chain-like protein ENSP0000290377                                                    |
| 16587 | dirMS_D41712_NAR_50mM_plus1.4822.4822.3     | 3 | 7.21 | 1 | 2.29E+05       | (R)IAEED(R)K A N E F D I D D V D Y T K(K)              | 80.78  | 522.5159 | 1565.645 | -0.0038 | -2.4  | 3.76 | 14366.2  | 4.71  | HUMAN | BBZCA1 | Thymosin alpha-1                                                                                           |
| 16588 | dirMS_D41712_NAR_50mM_plus1.7065.7065.3     | 3 | 7.21 | 0 | 3.92E+05       | (K)YELGR(V)K V I G E L A M A T(K)                      | 95.2   | 407.2199 | 1210.643 | 0.0021  | 1.8   | 8.59 | 24490    | 10.56 | HUMAN | H7C214 | 40S ribosomal protein S8                                                                                   |
| 16589 | dirMS_D41712_NAR_120mM_minus1.2006.12006.2  | 2 | 7.2  | 2 | 1.39E+05       | (K)MKEAE(K)M K E I J A E N A F N Q(K)T                 | 115.63 | 626.8305 | 1252.661 | -0.0069 | -5.5  | 5.9  | 17973    | 1.16  | HUMAN | EP965  | Heat shock cognate 71 kDa protein (Fragment)                                                               |
| 16590 | dirMS_D41712_NAR_30mM_minus1.15133.15133.2  | 2 | 7.2  | 2 | 5.54E+05 M316m | (R)ISQPT(R)S E Q I T A T M R(K)                        | 119.13 | 623.3014 | 1229.598 | 15.9772 | 1.8   | 6    | 42831.5  | 4.86  | HUMAN | AK854  | HCG19350A, isoform CRA_f                                                                                   |
| 16591 | dirMS_D41712_NAR_30mM_minus1.19492.19492.2  | 2 | 7.2  | 2 | 3.54E+05       | (R)IASLSS(R)R A S V S L Q W A M K(K)                   | 162.45 | 633.3234 | 1263.64  | -0.0007 | -0.5  | 6.05 | 266161   | 5.68  | HUMAN | EP9PU0 | Epipkain                                                                                                   |
| 16592 | dirMS_D41712_NAR_50mM_minus1.17938.17938.3  | 3 | 7.21 | 1 | 4.06E+05       | (R)IEATPR(R)E A T N P P T A G E E M P(K)               | 105.52 | 527.8426 | 1579.833 | 0.0066  | 4.2   | 4.79 | 55618.8  | 6.42  | HUMAN | G6E542 | Protein disulfide isomerase family A, member 3, isoform CRA_b                                              |
| 16593 | dirMS_D41712_NAR_50mM_plus1.6800.6800.2     | 2 | 7.2  | 2 | 5.92E+05       | (R)ITESTP(R)I T E S T I T A V I K P C(K)N              | 105.98 | 510.2775 | 1528.822 | -0.0038 | -2.5  | 5.81 | 99028.8  | 5.32  | HUMAN | Q9Y678 | Cotasterone subunit gamma-1                                                                                |
| 16594 | dirMS_D41712_NAR_60mM_minus1.15172.15172.3  | 3 | 7.2  | 2 | 1.80E+05       | (K)KIDLSY(K)K D L S T V Y L A Q L N K(K)               | 132.13 | 524.6378 | 1571.9   | -0.0015 | -0.9  | 6.07 | 13242.4  | 4.17  | HUMAN | EP9PH5 | Acidic leucine-rich nuclear phosphoprotein 32 family member E (Fragment)                                   |
| 16595 | dirMS_D41712_NAR_60mM_minus1.1858.1858.1.3  | 3 | 7.21 | 0 | 2.51E+05       | (R)IGDPA(R)K L A S L D L S L P P P R(K)                | 118.23 | 488.2833 | 1448.233 | -0.0026 | -1.8  | 5.53 | 6454.4   | 6.83  | HUMAN | AK8235 | 26S proteasome regulatory subunit 8                                                                        |
| 16597 | dirMS_D41712_NAR_60mM_minus1.9721.9721.3    | 3 | 7.2  | 2 | 5.63E+05       | (K)YVFHD(K)K V F E H D S V L E N L C(K)M               | 112.88 | 492.8981 | 1476.679 | 0.001   | 0.7   | 4.65 | 31975.7  | 6.55  | HUMAN | P10768 | 5-formyltetrahydrofolate dehydrogenase                                                                     |
| 16598 | dirMS_D41712_NAR_120mM_plus1.10800.10800.2  | 2 | 7.2  | 1 | 3.17E+05       | (R)IEKLE(R)E K L E I M E M E A A R(K)                  | 109.58 | 668.1848 | 1336.623 | -0.0012 | -0.9  | 4.49 | 29678.2  | 9.57  | HUMAN | C9Y58  | Non-POU domain-containing octamer-binding protein (Fragment)                                               |
| 16599 | dirMS_D41712_NAR_20mM_plus1.12323.12323.2   | 2 | 7.2  | 2 | 6.68E+04       | (R)IDAGA(R)I D A P L A P V R(K)                        | 158.02 | 427.5787 | 854.509  | -0.0007 | 0.8   | 5.84 | 27150.8  | 7.95  | HUMAN | Q99714 | 3-hydroxyacyl-CoA dehydrogenase type-2                                                                     |
| 16600 | dirMS_D41712_NAR_20mM_plus1.7618.7618.2     | 2 | 7.2  | 2 | 1.57E+05       | (R)IAVIA(R)I A V I A I C T K Y(K)                      | 122.43 | 569.2902 | 1137.572 | 0.001   | 0.9   | 8.59 | 31075.7  | 5.65  | HUMAN | PD0074 | Thiopyrophosphate isomerase                                                                                |
| 16601 | dirMS_D41712_NAR_20mM_plus1.8185.8185.2     | 2 | 7.2  | 2 | 4.72E+03 M233m | (K)EVOR(K)E V D E G L V S L Q V L N(K)                 | 126.32 | 731.8455 | 1446.689 | 15.9994 | -1.1  | 4.14 | 40969.4  | 4.83  | HUMAN | ETW819 | Tubulin beta chain                                                                                         |
| 16602 | dirMS_D41712_NAR_20mM_plus1.9636.9636.2     | 2 | 7.2  | 2 | 6.10E+04       | (R)ITJMSA(K)I T L V L V S A A P P C(K)                 | 137.97 | 478.793  | 956.577  | 0.0012  | 1.3   | 8.75 | 12480.3  | 9.05  | HUMAN | FSH124 | Acyl-coenzyme A thioesterase 13                                                                            |
| 16603 | dirMS_D41712_NAR_30mM_plus1.11413.11413.3   | 3 | 7.2  | 2 | 4.08E+05 M300m | (R)IUMGA(R)M G Q M A G A G A M G I V N N(K)            | 113.1  | 518.8921 | 1538.67  | 15.9923 | -1.7  | 9.5  | 43979.5  | 8.74  | HUMAN | FSV023 | Non-POU domain-containing octamer-binding protein                                                          |
| 16604 | dirMS_D41712_NAR_30mM_plus1.20571.20571.2   | 2 | 7.2  | 2 | 1.54E+05       | (K)IGLGN(K)G L V E A L I R L(K)                        | 161.3  | 599.8397 | 1198.679 | -0.0069 | -5.7  | 4.53 | 61411.3  | 1.74  | HUMAN | P10355 | 60 kDa SS-A/Ribonucleoprotein                                                                              |
| 16605 | dirMS_D41712_NAR_30mM_plus1.2186.2186.1.3   | 3 | 7.21 | 0 | 2.07E+05       | (R)IYDQ(R)K V I G E L A M A T(K)                       | 95.2   | 407.2199 | 1210.643 | 0.0021  | 1.8   | 8.59 | 24490    | 10.56 | HUMAN | H7C214 | 40S ribosomal protein S8                                                                                   |
| 16606 | dirMS_D41712_NAR_30mM_plus1.4355.4355.2     | 2 | 7.2  | 2 | 2.74E+05       | (R)ISTYGR(R)S Y T S A P P G S R(K)                     | 105.17 | 495.2155 | 911.422  | 0.002   | 2.2   | 8.46 | 19588.4  | 10.19 | HUMAN | FRY033 | Keratin, type II cytoskeletal 8 (Fragment)                                                                 |
| 16607 | dirMS_D41712_NAR_40mM_plus1.14591.14591.3   | 3 | 7.2  | 2 | 2.16E+04       | (K)YJGADD(K)Y G A D D I E L V P E A L H(K)A            | 153.4  | 604.6467 | 1811.912 | -0.0081 | 4.5   | 4.31 | 11409.8  | 9.02  | HUMAN | FSH2F4 | C-1-tetrahydrofolate synthase, cytoplasmic                                                                 |
| 16608 | dirMS_D41712_NAR_40mM_plus1.17945.17945.3   | 3 | 7.2  | 2 | 7.68E+04       | (K)DMTVP(R)K M D T V P V L V S K P P F T K(K)          | 173.33 | 610.3443 | 1829.024 | 0.0058  | 3.2   | 8.59 | 53885.5  | 9     | HUMAN | P11182 | Lipoamide acyltransferase component of branched-chain alpha-keto acid dehydrogenase complex, mitochondrial |
| 16609 | dirMS_D41712_NAR_40mM_plus1.2303.2303.3     | 3 | 7.2  | 2 | 4.84E+05       | (R)IGYSP(R)G N A I F S G V S Y G(K)                    | 116.53 | 507.2256 | 1011.344 | -0.0004 | 0.4   | 5.84 | 37486.1  | 9.03  | HUMAN | P22226 | Heterogeneous nuclear ribonucleoproteins A2/B1                                                             |
| 16610 | dirMS_D41712_NAR_50mM_plus1.16811.16811.3   | 3 | 7.2  | 2 | 7.42E+05       | (R)IQYDLY(R)P V Y T L L N Q A P Q M L R(K)             | 156.96 | 623.6447 | 1862.922 | -0.0022 | -1.2  | 6.74 | 4335.1   | 9.82  | HUMAN | ESN900 | 16S rRNA-associated small ribosomal protein Lm3                                                            |
| 16611 | dirMS_D41712_NAR_50mM_plus1.20331.20331.3   | 3 | 7.2  | 1 | 1.54E+05       | (R)IYPTDL(R)Y L P D T L L E C C G L L R(K)             | 175.18 | 615.0183 | 1933.046 | -0.006  | -3.1  | 4.68 | 25180.2  | 5.34  | HUMAN | ETX656 | Catechol O-methyltransferase (Fragment)                                                                    |
| 16612 | dirMS_D41712_NAR_50mM_plus1.8603.8603.3     | 3 | 7.2  | 1 | 1.71E+04       | (R)ILATNS(R)I A T N S A P D L N V R(K)                 | 112.28 | 500.6117 | 1499.818 | 0.0029  | 1.9   | 8.75 | 26332.5  | 10.95 | HUMAN | B4DSQ1 | Microtubule-associated protein                                                                             |
| 16613 | dirMS_D41712_NAR_50mM_plus1.9296.9296.3     | 3 | 7.2  | 2 | 1.07E+06 Y392y | (K)IQVPR(K)P V R G V Y M R G I A V G T F D R(K)        | 106.6  | 660.3045 | 1898.962 | 79.3589 | -14.9 | 9.98 | 23942.2  | 9.26  | HUMAN | ETW791 | Bifunctional coenzyme A synthase (Fragment)                                                                |
| 16614 | dirMS_D41712_NAR_120mM_minus1.10659.10659.3 | 3 | 7.21 | 0 | 2.17E+05       | (R)IYDQ(R)K V I G E L A M A T(K)                       | 112.63 | 492.8981 | 1476.679 | -0.0027 | -2.3  | 7.79 | 29873.3  | 6.19  | HUMAN | Q9P119 | Protein DapA                                                                                               |
| 16615 | dirMS_D41712_NAR_120mM_minus1.11205.11205.3 | 3 | 7.19 | 0 | 2.93E+05       | (K)SAPTEP(K)S A K P T K P A S D I L P V P A E G V R(K) | 115.03 | 664.3662 | 1991.092 | -0.008  | -4    | 8.31 | 54214.9  | 5.66  | HUMAN | C9J813 | Caldesmon (Fragment)                                                                                       |
| 16616 | dirMS_D41712_NAR_120mM_minus1.4385.4385.3   | 3 | 7.19 | 1 | 1.50E+07 M310m | (R)ITXTEE(R)I T X T E I S T M N R(N)                   | 72.87  | 408.8693 | 1208.594 | 15.9994 | 3.7   | 5.81 | 37296.3  | 5.33  | HUMAN | FRVU64 | Keratin, type II cytoskeletal 8                                                                            |
| 16617 | dirMS_D41712_NAR_120mM_minus1.7851.7851.3   | 3 | 7.19 | 0 | 3.37E+05       | (R)IAFNEA(R)F A N E A Q V N P E R(K)                   | 96.77  | 471.229  | 1411.671 | 0.0011  | 0.9   | 5.4  | 44227.3  | 7.81  | HUMAN | ET60E6 | Cytochrome kinase 1 subunit alpha                                                                          |
| 16618 | dirMS_D41712_NAR_20mM_plus1.14671.14671.3   | 3 | 7.19 | 0 | 7.26E+05       | (R)IYVGR(K)Y V D G G L V S L Q V L N(K)                | 126.32 | 731.8455 | 1446.689 | 15.9994 | -1.1  | 4.14 | 40969.4  | 4.83  | HUMAN | ETW819 | Tubulin beta chain                                                                                         |
| 16619 | dirMS_D41712_NAR_20mM_plus1.8242.8242.2     | 2 | 7.19 | 0 | 1.66E+05 M161m | (R)IEKLE(R)E K L E I M E M E A A R(K)                  | 132.15 | 524.2783 | 1        |         |       |      |          |       |       |        |                                                                                                            |

|       |                                            |   |      |   |                 |                                            |        |          |          |          |      |      |          |       |       |        |                                                                     |
|-------|--------------------------------------------|---|------|---|-----------------|--------------------------------------------|--------|----------|----------|----------|------|------|----------|-------|-------|--------|---------------------------------------------------------------------|
| 16673 | dirMS_041712_NAR_60mM_minus.6119.6119.3    | 3 | 7.17 | 1 | 2.996E+05       | (K)IETEGV(K)E T E G D V S V K D A Q K      | 92.5   | 460.2267 | 1378.67  | -0.0041  | -3   | 4.32 | 58214.7  | 5.25  | HUMAN | B4DEM7 | T-complex protein 1 subunit theta                                   |
| 16674 | dirMS_041712_NAR_120mM_plus.10470.10470.3  | 3 | 7.17 | 1 | 5.50E+05        | (R)NSIKSEI(R)N S K E I S E L N W R         | 108.33 | 434.9023 | 1302.701 | -0.0059  | -6.8 | 6.14 | 66208.7  | 8.32  | HUMAN | P04264 | Keratin, type II cytoskeletal 1                                     |
| 16675 | dirMS_041712_NAR_120mM_plus.12645.12645.3  | 3 | 7.17 | 0 | 8.50E+05        | (K)HYPGKQ(K)Y G E T C V A F V E I S R      | 121.4  | 461.2307 | 1415.628 | -0.0007  | -7.3 | 4.6  | 23199.7  | 9.48  | HUMAN | P02454 | Positively charged cis-trans isomerase B                            |
| 16676 | dirMS_041712_NAR_120mM_plus.18685.18685.4  | 4 | 7.17 | 0 | 3.80E+05        | (K)MPPRRP(K)M P R D P N V E V A T N L K R  | 151.27 | 466.239  | 1862.04  | -0.0089  | -3.1 | 9.65 | 18988.7  | 11.2  | HUMAN | H3B7P7 | 60S ribosomal protein L4 (Fragment)                                 |
| 16677 | dirMS_041712_NAR_20mM_plus.10589.10589.2   | 2 | 7.17 | 0 | 2.04E+05        | (K)NAGVEV(K)N A G V E G S L V E V E K      | 146.07 | 608.3304 | 1255.658 | -0.0044  | -3.6 | 4.53 | 61224.7  | 5.7   | HUMAN | P10809 | 60 kDa heat shock protein, mitochondrial                            |
| 16678 | dirMS_041712_NAR_20mM_plus.11592.11592.3   | 3 | 7.17 | 0 | 3.27E+04 M596m  | (R)MGPMG(K)M G P A M G P A L G A G E I R M | 152.82 | 481.9117 | 1427.713 | 16.0072  | 8.5  | 5.75 | 77799.7  | 9.09  | HUMAN | PS2272 | Heterogeneous nuclear ribonucleoprotein M                           |
| 16679 | dirMS_041712_NAR_20mM_plus.12645.12645.3   | 3 | 7.17 | 0 | 6.37E+04        | (K)MAGDT(K)Y N Q T C V A F V E I S R       | 159.7  | 511.9382 | 1533.802 | -0.0059  | -4.6 | 6.05 | 73397.3  | 6.86  | HUMAN | Q22445 | Furculetin domain-binding protein 2                                 |
| 16680 | dirMS_041712_NAR_20mM_plus.13948.13948.2   | 2 | 7.17 | 0 | 1.01E+05 M2232m | (R)SLVYNR(R)S L L V N P G E T L M R        | 167.43 | 721.8852 | 1426.772 | 15.9509  | 2.8  | 5.2  | 276046.1 | 6.01  | HUMAN | PH3327 | Fatty acid synthase                                                 |
| 16681 | dirMS_041712_NAR_20mM_plus.18016.18016.2   | 2 | 7.17 | 0 | 1.49E+05        | (R)TVDSLE(R)T V Q S L E V D D S M R        | 195.15 | 735.8776 | 1506.747 | 0.0011   | 0.7  | 4.03 | 43773.3  | 5.26  | HUMAN | F8V2Y9 | Keratin, type I cytoskeletal 18                                     |
| 16682 | dirMS_041712_NAR_30mM_plus.13536.13536.2   | 2 | 7.17 | 0 | 7.56E+05        | (R)SMMT(R)P S S W F T I R                  | 124.75 | 471.7412 | 942.471  | 0.0038   | 4    | 9.47 | 55722.8  | 7.62  | HUMAN | Q9Y10  | tRNA-splicing ligase RtcB homolog                                   |
| 16683 | dirMS_041712_NAR_30mM_plus.16807.16807.2   | 2 | 7.17 | 0 | 3.33E+05        | (R)WDLRT(R)W D I T V G T T R               | 140.72 | 632.8304 | 1264.653 | 0.0031   | 0.3  | 5.84 | 33029.4  | 9.62  | HUMAN | D0R610 | Guanine nucleotide-binding protein subunit beta-2-like 1 (Fragment) |
| 16684 | dirMS_041712_NAR_30mM_plus.19097.19097.3   | 3 | 7.17 | 0 | 4.60E+05 M166m  | (R)KPEFV(R)K E T F H I L L Q T V A R       | 135.17 | 464.605  | 1388.021 | 0.0054   | 5.1  | 6.12 | 20991.7  | 8.74  | HUMAN | I72426 | Nyxin light polypeptide 6                                           |
| 16685 | dirMS_041712_NAR_60mM_plus.14879.14879.3   | 3 | 7.17 | 0 | 1.05E+05        | (K)MNGHG(K)M G G G P T V I A G V P L K R   | 134.4  | 511.6089 | 1532.825 | -0.0132  | -8.6 | 8.52 | 11409.8  | 9.02  | HUMAN | FSH2F4 | C1-tetrahydrofolate synthase, cytoplasmic                           |
| 16686 | dirMS_041712_NAR_60mM_plus.20523.20523.3   | 3 | 7.17 | 0 | 1.48E+05        | (K)NAAAG(K)N A V A G L D L K E R           | 166.95 | 452.6004 | 1355.789 | -0.0026  | -2.8 | 4.07 | 17388.8  | 9.33  | HUMAN | I72451 | Transcription elongation factor A protein 1                         |
| 16687 | dirMS_041712_NAR_120mM_minus.13168.13168.4 | 4 | 7.16 | 2 | 2.41E+06        | (R)ADJDE(R)A Q D K E L M E V E I Q L K E   | 126.52 | 490.7539 | 1960.006 | -0.0118  | -6   | 4.58 | 31923.6  | 4.85  | HUMAN | I72756 | Tropomyosin alpha-1 chain                                           |
| 16688 | dirMS_041712_NAR_20mM_minus.18920.18920.2  | 2 | 7.16 | 0 | 1.32E+05        | (R)NTLYL(K)N T W L Y Q A L R               | 157.48 | 582.2975 | 1525.616 | -0.0015  | -1.3 | 8.75 | 49457.5  | 6.47  | HUMAN | PS5445 | C-terminal-binding protein 2                                        |
| 16689 | dirMS_041712_NAR_20mM_minus.19261.19261.2  | 2 | 7.16 | 0 | 2.53E+05        | (R)LTALRL(R)T L A L R H                    | 195.55 | 400.2731 | 799.54   | -0.0011  | -1.3 | 9.75 | 87498    | 6.43  | HUMAN | C9266  | E3 ubiquitin-protein ligase RNF123                                  |
| 16690 | dirMS_041712_NAR_50mM_minus.15909.15909.3  | 3 | 7.16 | 1 | 8.21E+04        | (K)DNAEK(K)D A N L V E L V E A L Q R A     | 158.97 | 543.6248 | 1628.86  | -0.0004  | -0.2 | 4.68 | 56077.4  | 5.37  | HUMAN | F8V8X4 | Keratin, type II cytoskeletal 8                                     |
| 16691 | dirMS_041712_NAR_50mM_minus.18813.18813.3  | 3 | 7.16 | 0 | 2.37E+05        | (K)GALREY(K)A E L V L V S L V P A V R      | 183.2  | 535.3101 | 1603.917 | -0.0009  | -0.5 | 5.4  | 53278.2  | 6.32  | HUMAN | C9Z24  | 26S proteasome non-ATPase regulatory subunit 6                      |
| 16692 | dirMS_041712_NAR_60mM_minus.5462.5462.3    | 3 | 7.16 | 1 | 2.46E+05        | (R)GQYRE(R)E Y E E E E T Y T V K S         | 112.57 | 585.6185 | 1754.844 | -0.0034  | -1.9 | 4.32 | 54214.9  | 5.66  | HUMAN | C9J813 | Caldesmon (Fragment)                                                |
| 16693 | dirMS_041712_NAR_120mM_plus.8645.8645.3    | 3 | 7.16 | 0 | 4.30E+04        | (R)IQJDE(R)R Q D E L L E L A Q N R         | 89.1   | 548.2767 | 1642.814 | 0.0012   | 0.7  | 4.49 | 43903    | 4.94  | HUMAN | HY0N1  | Plectin (Fragment)                                                  |
| 16694 | dirMS_041712_NAR_20mM_plus.10989.10989.3   | 3 | 7.16 | 0 | 1.01E+05        | (K)IAAAGA(K)A L A N Q V S G A Q V R        | 147.88 | 449.9174 | 1347.738 | -0.0003  | -0.2 | 8.79 | 56491.1  | 7.78  | HUMAN | B4D7G2 | Elongation factor 1-gamma                                           |
| 16695 | dirMS_041712_NAR_20mM_plus.14067.14067.3   | 3 | 7.16 | 0 | 3.05E+04 S68b   | (K)FLFEGT(K)F L E G T M Q V A S R          | 168.3  | 552.9426 | 1453.71  | 203.1209 | 14.2 | 5.72 | 16739.9  | 9.44  | HUMAN | C9JM66 | FCH and double SH3 domains protein 2 (Fragment)                     |
| 16696 | dirMS_041712_NAR_20mM_plus.14301.14301.3   | 3 | 7.16 | 0 | 7.24E+05        | (R)VFVTAN(R)P T A N V S V D L T C R        | 169.75 | 510.9348 | 1530.795 | -0.0046  | -3   | 5.81 | 3718.5   | 7.17  | HUMAN | E7J614 | Glyceroldehyde-3-phosphate dehydrogenase                            |
| 16697 | dirMS_041712_NAR_20mM_plus.13701.13701.3   | 3 | 7.15 | 0 | 1.97E+05        | (K)KVDAA(K)K Q V A N A Q S L R             | 188.3  | 518.2975 | 1552.861 | -0.0002  | -1.7 | 5.97 | 10728.1  | 9.25  | HUMAN | C9JL01 | Mitochondrial import inner membrane translocase subunit Timl3       |
| 16698 | dirMS_041712_NAR_20mM_plus.17965.17965.3   | 3 | 7.16 | 0 | 1.93E+05        | (R)TVDSLE(R)T V Q S L E I D L D S M R      | 195.03 | 502.9236 | 1506.747 | 0.0004   | 6.2  | 4.03 | 43773.3  | 5.26  | HUMAN | F8V2Y9 | Keratin, type I cytoskeletal 18                                     |
| 16699 | dirMS_041712_NAR_20mM_plus.8279.8279.2     | 2 | 7.16 | 0 | 9.35E+04        | (R)ILATNTS(R)I A T N T S A P D L K R       | 127.33 | 565.806  | 1130.605 | -0.0095  | -4.0 | 5.84 | 26233.5  | 10.95 | HUMAN | B4DSQ1 | Microtubule-associated protein                                      |
| 16700 | dirMS_041712_NAR_30mM_plus.11564.11564.2   | 2 | 7.16 | 0 | 4.18E+05        | (R)GNGNS(R)I N L N S A V R                 | 114.3  | 415.2469 | 829.489  | -0.0027  | -3   | 9.75 | 69753.6  | 5.49  | HUMAN | E7X171 | Eukaryotic translation initiation factor 4B                         |
| 16701 | dirMS_041712_NAR_30mM_plus.13800.13800.2   | 2 | 7.16 | 0 | 3.16E+05        | (R)KPEFV(R)K E T F H I L L Q T V A R       | 135.17 | 464.605  | 1388.021 | 0.0054   | 5.1  | 6.12 | 20991.7  | 8.74  | HUMAN | I72426 | Nyxin light polypeptide 6                                           |
| 16702 | dirMS_041712_NAR_30mM_plus.17078.17078.2   | 2 | 7.16 | 0 | 3.76E+05        | (K)GNDGR(K)N C V G D T L K T               | 142.3  | 484.7442 | 966.471  | 0.0098   | 10.1 | 5.84 | 138084.9 | 5.52  | HUMAN | Q600Y  | Cullin-associated NEDD8-dissociated protein 1                       |
| 16703 | dirMS_041712_NAR_30mM_plus.9266.9266.2     | 2 | 7.16 | 0 | 7.68E+05        | (K)ITAVDC(K)T A V C D P P R G              | 101.15 | 514.7643 | 1028.519 | 0.002    | 1.9  | 5.5  | 50199.4  | 4.75  | HUMAN | ANNZ22 | Tubulin beta-8 chain-like protein LOC260334                         |
| 16704 | dirMS_041712_NAR_40mM_plus.9475.9475.2     | 2 | 7.16 | 0 | 8.89E+04        | (R)LVDMN(R)P L D M M E R G                 | 107.47 | 447.2146 | 893.422  | 0        | 0    | 4.37 | 73386.6  | 8.73  | HUMAN | B4D4X7 | ATP-dependent RNA helicase DDX3Y                                    |
| 16705 | dirMS_041712_NAR_40mM_plus.13808.13808.3   | 3 | 7.16 | 0 | 3.46E+05        | (K)FSDP(K)R F S D P A V L E R S            | 153.65 | 528.2984 | 1638.828 | 0.0004   | 0.3  | 5.36 | 27480.3  | 6.01  | HUMAN | C9J242 | Cytoplasmic dynein 1 heavy chain 1                                  |
| 16706 | dirMS_041712_NAR_60mM_plus.13357.13357.3   | 3 | 7.16 | 0 | 6.62E+05 M1m    | (J)HVVHHR(K)W N H A E F K R                | 126.13 | 417.8778 | 1235.624 | 15.9947  | -0.2 | 4.65 | 45508.6  | 5.5   | HUMAN | AKR7Q2 | Heat shock cognate 71 kDa protein                                   |
| 16707 | dirMS_041712_NAR_60mM_plus.17426.17597.3   | 3 | 7.16 | 1 | 8.46E+05        | (R)DKLNK(R)K L N L N L V L F D R           | 148.4  | 440.2499 | 1318.737 | -0.0014  | -1   | 5.96 | 13798.9  | 10.17 | HUMAN | P62851 | 40S ribosomal protein S25                                           |
| 16708 | dirMS_041712_NAR_60mM_plus.17936.17936.3   | 3 | 7.16 | 1 | 2.50E+05        | (R)KGTSTO(R)Q I F T D L V A E K R N        | 150.63 | 569.9588 | 1707.855 | 0.0007   | 4.1  | 4.41 | 144109.9 | 6.01  | HUMAN | J3K8R7 | Clathrin heavy chain 2                                              |
| 16709 | dirMS_041712_NAR_60mM_plus.6502.6502.3     | 3 | 7.16 | 1 | 1.72E+06        | (R)KTETSE(R)K T E S E V M R N R            | 92.8   | 404.5374 | 1208.594 | 0.0037   | 3    | 5.81 | 37296.3  | 5.3   | HUMAN | F8VU64 | Keratin, type II cytoskeletal 8                                     |
| 16710 | dirMS_041712_NAR_20mM_minus.7697.7697.2    | 2 | 7.15 | 0 | 2.04E+05        | (K)TVPEK(K)T V E P V A V T S K             | 125.87 | 535.7883 | 1030.578 | -0.0086  | -8.2 | 5.66 | 35720    | 5.44  | HUMAN | B4E358 | Sr substrate cortactin                                              |
| 16711 | dirMS_041712_NAR_20mM_minus.7951.7951.3    | 3 | 7.15 | 0 | 4.94E+04        | (R)GQYRE(R)G Q G E G E Q E A A A A A R     | 128.8  | 606.6126 | 1817.826 | -0.0028  | -1.5 | 4.09 | 558007.1 | 5.44  | HUMAN | PS8107 | Epiplakin                                                           |
| 16712 | dirMS_041712_NAR_20mM_minus.8116.8116.2    | 2 | 7.15 | 0 | 1.00E+05        | (R)ITGTVR(R)I A T G V P D P Y G E K        | 130.42 | 678.3078 | 1355.611 | -0.0031  | -2.3 | 4.37 | 266161   | 5.68  | HUMAN | EP9P0U | Epiplakin                                                           |
| 16713 | dirMS_041712_NAR_20mM_minus.8307.8307.2    | 2 | 7.15 | 0 | 1.41E+05        | (K)GVDSKA(K)V I G S L V S R                | 132.33 | 516.2777 | 1031.548 | -0.0009  | -0.8 | 5.84 | 266161   | 5.68  | HUMAN | EP9P0U | Epiplakin                                                           |
| 16714 | dirMS_041712_NAR_20mM_minus.10629.10629.2  | 2 | 7.15 | 0 | 3.22E+05        | (R)KPEFV(R)K E T F H I L L Q T V A R       | 135.17 | 464.605  | 1388.021 | 0.0054   | 5.1  | 6.12 | 20991.7  | 8.74  | HUMAN | I72426 | Nyxin light polypeptide 6                                           |
| 16715 | dirMS_041712_NAR_20mM_minus.15822.15822.2  | 2 | 7.15 | 0 | 9.22E+04 M57m   | (K)EINGTE(K)E N G T E P D R                | 89.88  | 460.7171 | 904.419  | 16.0076  | 13.8 | 4.37 | 15175.4  | 10.46 | HUMAN | B7Z4C8 | 60S ribosomal protein L31                                           |
| 16716 | dirMS_041712_NAR_40mM_minus.16015.16015.2  | 2 | 7.15 | 0 | 1.00E+06        | (K)GAFGAK(K)G F A E D D P R                | 98.48  | 488.7279 | 976.448  | 0.0002   | 0.2  | 4.21 | 123099.1 | 5.83  | HUMAN | ASA3E0 | POTE ankyrin domain family member F                                 |
| 16717 | dirMS_041712_NAR_50mM_minus.17055.17055.3  | 3 | 7.15 | 0 | 1.55E+05        | (R)LLVLSG(R)F L V S E I L P K T G K        | 116.38 | 546.3329 | 1638.988 | -0.0042  | -2.6 | 6.14 | 13611    | 6.13  | HUMAN | EP9P22 | Spectrin beta chain, non-erythrocytic 2 (Fragment)                  |
| 16718 | dirMS_041712_NAR_50mM_minus.17228.17228.3  | 3 | 7.15 | 0 | 2.38E+04        | (R)ELTLE(R)E L T L V L E L V E R S         | 123.72 | 408.5768 | 1199.688 | -0.0007  | -0.6 | 4.79 | 27480.3  | 5.79  | HUMAN | Q15020 | Spectrin beta chain, non-erythrocytic 2                             |
| 16719 | dirMS_041712_NAR_60mM_minus.12643.13163.3  | 3 | 7.15 | 0 | 9.18E+05        | (K)SGHPTFK(K)G H P T I S E S K Q K         | 132.28 | 466.2462 | 1456.738 | -0.0014  | -1.1 | 6.75 | 52843.5  | 6.17  | HUMAN | I72910 | T-complex protein 1 subunit delta                                   |
| 16720 | dirMS_041712_NAR_60mM_minus.13634.13634.3  | 3 | 7.15 | 0 | 1.41E+05        | (R)MVMPP(R)M V P G V D A P H R F           | 135.72 | 432.2409 | 1294.694 | 0.0145   | 0.6  | 4.49 | 18330.7  | 11.54 | HUMAN | ESFRU4 | Dihydropyrimidinase-related protein 2 (Fragment)                    |
| 16721 | dirMS_041712_NAR_60mM_minus.14739.14739.3  | 3 | 7.15 | 0 | 2.58E+05        | (K)YTTIDH(K)Y Y T I D A P G H R D          | 142.85 | 475.81   |          |          |      |      |          |       |       |        |                                                                     |



|       |                                            |   |      |           |                                                            |        |          |          |          |       |      |          |             |        |                                                                              |
|-------|--------------------------------------------|---|------|-----------|------------------------------------------------------------|--------|----------|----------|----------|-------|------|----------|-------------|--------|------------------------------------------------------------------------------|
| 16891 | dirMS_041712_NAR_20mM_plus.19033.19032.2   | 2 | 7.08 | 0.191E+05 | (R)STGAE(R)S T E V A I F V P (P) I S Q/E (A/E A E)K        | 200.2  | 921.4477 | 1841.892 | -0.0035  | -1.9  | 4.25 | 24249.1  | 6.99 HUMAN  | DR88M0 | Heterogeneous nuclear ribonucleoprotein H (Fragment)                         |
| 16892 | dirMS_041712_NAR_20mM_plus.19359.19359.2   | 2 | 7.08 | 0.141E+05 | (R)TGAVN(R)T G A A (I) D V I P G E L L G R                 | 204.68 | 182.9497 | 1624.891 | -0.0017  | -1    | 4.14 | 15338.4  | 5.51 HUMAN  | K7EPI1 | ATP synthase subunit alpha, mitochondrial (Fragment)                         |
| 16893 | dirMS_041712_NAR_20mM_plus.14451.14451.3   | 2 | 7.08 | 0.258E+05 | (R)TQVLR(Q)R L V I V Q L G                                 | 128.37 | 940.567  | 940.567  | -0.0021  | -1.2  | 9.75 | 28772.3  | 6.99 HUMAN  | ATP6A2 | Proteasome activator complex subunit 1                                       |
| 16894 | dirMS_041712_NAR_30mM_plus.21895.21895.2   | 2 | 7.08 | 0.156E+05 | (R)QSFAL(R)S S F A/L/A/G/L/V G K I A                       | 170.63 | 640.3472 | 1279.689 | -0.0021  | -1.7  | 5.84 | 46579.3  | 4.96 HUMAN  | ESR07  | Transportin-1                                                                |
| 16895 | dirMS_041712_NAR_30mM_plus.4555.4555.2     | 2 | 7.08 | 0.366E+05 | (R)YSTYSGR(R)S Y T I S G P G S R                           | 73.6   | 456.2155 | 911.422  | -0.002   | 2.2   | 8.46 | 19288.4  | 10.19 HUMAN | F8VQY3 | Keratin, type II cytoskeletal 8 (Fragment)                                   |
| 16896 | dirMS_041712_NAR_50mM_plus.11825.11825.3   | 2 | 7.08 | 1.379E+05 | (K)GRIEHW(K)G R I E D V T P (P) I S D S T R I R            | 130.28 | 585.9784 | 1755.924 | -0.0029  | -1.7  | 4.56 | 16443.6  | 10.19 HUMAN | PE62B3 | 40S ribosomal protein S14                                                    |
| 16897 | dirMS_041712_NAR_50mM_plus.11834.11834.3   | 2 | 7.08 | 0.317E+04 | (K)SNMGR(K)S N M G H P R P E A S G L I A A L A K I         | 130.23 | 550.2462 | 1650.827 | -0.0028  | -0.7  | 5.17 | 27636.6  | 6.01 HUMAN  | PH82B7 | ATP-dependent RNA helicase DHX29                                             |
| 16898 | dirMS_041712_NAR_50mM_plus.19735.19735.3   | 2 | 7.08 | 1.182E+05 | (R)TSLTLE(R)T S I L L T L E D V K G Q L V (L)R I           | 172.17 | 577.3359 | 1279.955 | -0.0014  | -0.8  | 4.68 | 156316.8 | 8.61 HUMAN  | QZ7478 | ATP-dependent RNA helicase DHX29                                             |
| 16899 | dirMS_041712_NAR_60mM_plus.17016.17016.3   | 2 | 7.08 | 0.340E+05 | (K)GHEVH(K)G H V E V V S /A/L/Q/Q I R                      | 145.97 | 498.9326 | 1494.791 | -0.0078  | -5.2  | 4.75 | 48586.6  | 9.32 HUMAN  | DR6R2C | Ankyrin-3                                                                    |
| 16900 | dirMS_041712_NAR_60mM_plus.7274.7315.3     | 2 | 7.08 | 0.300E+05 | (R)ITPAFH(K)T I P A H D Q N V G E L V /G Q R (R)           | 96.68  | 581.6074 | 1742.809 | -0.0016  | -0.9  | 6.54 | 14718.6  | 7.8 HUMAN   | RV0V43 | Valine-tRNA ligase                                                           |
| 16901 | dirMS_041712_NAR_120mM_minus.17614.17614.4 | 2 | 7.07 | 2.250E+05 | (R)IKTLAS(K)R L K L A S I L S /N S I R E V E A I R K I     | 102.27 | 458.0031 | 1628.988 | -0.005   | -2.7  | 4.23 | 43773.3  | 5.26 HUMAN  | F9R719 | Keratin, type I cytoskeletal 18                                              |
| 16902 | dirMS_041712_NAR_20mM_plus.1966.1966.2     | 2 | 7.07 | 0.101E+05 | (R)KSTQV(T)F T A A I A I T V I P G Q L V (L)R I            | 157.17 | 671.3325 | 1345.791 | -0.018   | -13.4 | 6.39 | 5739.2   | 6.34 HUMAN  | Q41375 | 3-phosphoglycerate dehydrogenase                                             |
| 16903 | dirMS_041712_NAR_20mM_minus.8715.8715.3    | 2 | 7.07 | 0.696E+04 | (R)SPSSD(S)R S P S D S S T A S T I P V I A /Q E I (V)R A   | 136.63 | 621.2935 | 1861.877 | -0.0114  | -6.1  | 4.14 | 76925.9  | 4.46 HUMAN  | ABMVS8 | Drebrin                                                                      |
| 16904 | dirMS_041712_NAR_30mM_minus.12270.12270.2  | 2 | 7.07 | 0.151E+05 | (R)JMLV(S)R J M A /V L S /K I A                            | 121.08 | 410.242  | 819.465  | -0.0123  | -1.5  | 5.75 | 52843.5  | 6.17 HUMAN  | B7ZS0L | T-complex protein 1 subunit delta                                            |
| 16905 | dirMS_041712_NAR_30mM_minus.18308.18308.2  | 2 | 7.07 | 0.157E+05 | (K)GVAWY(K)F G I A I /V I D C L (R)K I                     | 133.55 | 555.7984 | 1110.594 | -0.0047  | -4.2  | 5.83 | 20989.9  | 5.92 HUMAN  | F8W8T8 | Acetyl-CoA carboxylase 2                                                     |
| 16906 | dirMS_041712_NAR_40mM_minus.5381.5381.2    | 2 | 7.07 | 0.101E+05 | (K)DSVGG(K)D S V I V G D E A Q S K R I                     | 89.65  | 599.7657 | 1198.522 | -0.0019  | -1.6  | 4.0  | 32616.5  | 5.18 HUMAN  | ANL176 | Actin, alpha skeletal muscle                                                 |
| 16907 | dirMS_041712_NAR_50mM_minus.12385.12385.3  | 2 | 7.07 | 1.870E+03 | M124m.M.(K)SYNUN(K)S Y A /N V M D A I M E A I K (X)T       | 137.73 | 553.6001 | 1626.823 | -0.1988  | 0     | 5.79 | 80685.1  | 7.31 HUMAN  | PO5565 | Propionyl-CoA carboxylase alpha chain, mitochondrial                         |
| 16908 | dirMS_041712_NAR_50mM_minus.15835.15835.3  | 2 | 7.07 | 0.969E+04 | (K)INLEAAE(K)N I L E A E L G E I S D H T (K) I K I         | 158.72 | 618.326  | 1852.965 | -0.0016  | -0.9  | 4.4  | 84268.2  | 6.32 HUMAN  | QU9HD2 | Serine/threonine protein kinase TBK1                                         |
| 16909 | dirMS_041712_NAR_50mM_minus.16738.16738.3  | 2 | 7.07 | 0.377E+04 | (K)ITVSGV(K)T V S /G V N G P /L V D I H V Y (K) V          | 164.65 | 549.9835 | 1647.943 | -0.0069  | -4.2  | 6.41 | 6939     | 10.41 HUMAN | ESR6H6 | V-type proton ATPase subunit b, brain isoform                                |
| 16910 | dirMS_041712_NAR_50mM_minus.5961.5961.3    | 2 | 7.07 | 0.355E+04 | (R)IATAP(R)T I A I A P Q T Q V S P M R (K) I               | 96.35  | 475.244  | 1423.711 | -0.0064  | -4.5  | 8.8  | 29484.1  | 4.91 HUMAN  | EP9BQ9 | Elongation factor 1-delta                                                    |
| 16911 | dirMS_041712_NAR_50mM_minus.7640.7640.3    | 2 | 7.07 | 2.665E+04 | 11121.(R)IQLELEH(R)Q L E /L R E M R I (R) I R I            | 110.55 | 598.2978 | 1589.806 | 203.0724 | -3.9  | 4.95 | 35626.3  | 6.14 HUMAN  | HY029  | Centrosomal protein of 128 kDa (Fragment)                                    |
| 16912 | dirMS_041712_NAR_60mM_minus.16317.16317.3  | 2 | 7.07 | 0.158E+05 | (R)JFGSGR(R)F Q G S D F H V I N G V L (R) T                | 150.83 | 530.2846 | 1588.283 | 0.0162   | -10.2 | 7.4  | 104619   | 5.75 HUMAN  | F8W904 | Exportin-2                                                                   |
| 16913 | dirMS_041712_NAR_60mM_minus.17056.17056.3  | 2 | 7.07 | 1.190E+05 | (K)ILIDQFF(K)Q L /A Q D F F F G R D L N (K) I S            | 155.28 | 527.277  | 1579.283 | -0.0063  | -4    | 5.96 | 60126    | 5.44 HUMAN  | E7E94  | Heat shock 70 kDa protein 1A/1B                                              |
| 16914 | dirMS_041712_NAR_50mM_minus.9591.9591.3    | 2 | 7.07 | 1.563E+05 | M230m.M.(K)IMJMS(K)S M K E V D E D Q (M) L V I V Q N (K) N | 114.67 | 652.6318 | 1922.897 | -0.1986  | -3.2  | 4.68 | 40069.4  | 4.83 HUMAN  | E7EVLW | Tubulin beta chain                                                           |
| 16915 | dirMS_041712_NAR_120mM_plus.10190.10190.2  | 2 | 7.07 | 0.461E+05 | (R)HVEH(R)H V H I E I G Q D V (R) E R                      | 109.95 | 546.7931 | 1092.528 | -0.006   | -0.6  | 5.32 | 47711.6  | 5.93 HUMAN  | EP9070 | Heterogeneous nuclear ribonucleoprotein H                                    |
| 16916 | dirMS_041712_NAR_120mM_plus.10420.10420.3  | 2 | 7.07 | 0.964E+05 | (R)GFLCPL(R)F G C /L P P H C S (R) I G                     | 107.67 | 410.8593 | 1230.551 | -0.0127  | -10.3 | 9.75 | 14391.8  | 4.99 HUMAN  | G3V461 | Creatine kinase B-type (Fragment)                                            |
| 16917 | dirMS_041712_NAR_20mM_plus.16769.16769.3   | 2 | 7.07 | 0.301E+05 | (K)GVIAA(K)Q V I A V A A N I Q A L Q (R) M I               | 186.93 | 518.2795 | 1552.881 | -0.0026  | -1.7  | 5.97 | 10728.1  | 9.15 HUMAN  | Q9YSL4 | Mitochondrial import inner membrane translocase subunit Tim13                |
| 16918 | dirMS_041712_NAR_20mM_plus.19336.19336.3   | 2 | 7.07 | 0.930E+04 | (R)IAGLGG(R)A L L A G G G A P E V G L V K D (R) I S        | 205.05 | 517.6345 | 1550.89  | -0.0011  | -0.7  | 4.53 | 42755    | 7.81 HUMAN  | B7ZT74 | T-complex protein 1 subunit delta                                            |
| 16919 | dirMS_041712_NAR_20mM_plus.16727.16727.2   | 2 | 7.07 | 1.696E+04 | (R)IATL(R)T T A A I A I T V I P G Q L V (L)R I             | 157.17 | 671.3325 | 1345.791 | -0.018   | -13.4 | 6.39 | 5739.2   | 6.34 HUMAN  | Q41375 | 3-phosphoglycerate dehydrogenase                                             |
| 16920 | dirMS_041712_NAR_20mM_plus.9978.9978.2     | 2 | 7.07 | 0.691E+04 | (R)IALGOM(R)A L S Q N P T N A I V L V (L) R I              | 140.02 | 677.8072 | 1354.733 | -0.0006  | -0.5  | 6.05 | 26991.7  | 5.01 HUMAN  | B7Z624 | Miosin light polypeptide 6                                                   |
| 16921 | dirMS_041712_NAR_40mM_plus.12216.12216.2   | 2 | 7.07 | 0.328E+03 | (K)LYANM(R)K I L Y A N M F E R I (L) R I                   | 137.76 | 522.2521 | 1043.498 | -0.001   | -0.9  | 6    | 9740.1   | 10.08 HUMAN | HY0FQ2 | Peptidyl-prolyl cis-trans isomerase FKBP4, N-terminally processed (Fragment) |
| 16922 | dirMS_041712_NAR_40mM_plus.19441.19441.3   | 2 | 7.07 | 1.458E+05 | (K)ALFEV(K)K L E /I V P E L L T E A E K (K) I E            | 181.77 | 515.9991 | 1845.984 | -0.0017  | -0.9  | 4.32 | 65036    | 6.27 HUMAN  | EP9BU3 | Phosphoribosylaminimidazolecarboxamide formyltransferase                     |
| 16923 | dirMS_041712_NAR_50mM_plus.5716.5716.2     | 2 | 7.07 | 1.558E+05 | (R)IAGDGE(K)R L S E A S I L S /N S I R E V E A I R K I     | 102.27 | 458.0031 | 1628.988 | -0.005   | -2.7  | 4.23 | 43773.3  | 5.26 HUMAN  | F9R719 | Keratin, type I cytoskeletal 18                                              |
| 16924 | dirMS_041712_NAR_50mM_plus.11357.11357.3   | 2 | 7.07 | 0.584E+04 | (K)SLVVAE(K)S L Y I V A E Y H S F V E D E K (P) I          | 127.85 | 664.6463 | 1991.923 | -0.0011  | -0.5  | 4.25 | 54815.2  | 9.17 HUMAN  | PE2566 | Probable ATP-dependent RNA helicase DDX6                                     |
| 16925 | dirMS_041712_NAR_50mM_plus.17628.17628.3   | 2 | 7.07 | 0.502E+05 | (R)JIMEVD(R)M I E /V A I D A I T T A T V A (R) I R         | 162.68 | 688.6636 | 1913.975 | -0.0013  | -0.7  | 5.32 | 94165.2  | 11.62 HUMAN | IBL305 | Profilin-1 (Fragment)                                                        |
| 16926 | dirMS_041712_NAR_50mM_plus.19593.19593.3   | 2 | 7.07 | 1.925E+04 | (K)ITFVNI(K)T F V N I /V T P A E V G V I V N K D (R) I S   | 103.23 | 493.6249 | 1915.065 | -0.0052  | -2.7  | 5.74 | 17630.6  | 6.29 HUMAN  | Q43575 | D-3-phosphoglycerate dehydrogenase                                           |
| 16927 | dirMS_041712_NAR_50mM_plus.7162.7162.3     | 2 | 7.07 | 1.693E+04 | (K)EASQD(K)K A S K Q V A V V L V N A I V (L) R I           | 171.63 | 496.2658 | 1486.786 | -0.0002  | -2.1  | 6.17 | 57391.2  | 6.29 HUMAN  | Q43575 | D-3-phosphoglycerate dehydrogenase                                           |
| 16928 | dirMS_041712_NAR_50mM_plus.8131.8131.3     | 2 | 7.07 | 1.745E+03 | (K)CLDNR(K)K S D E N L L E G D A S Q C K (L) R I           | 109.32 | 570.9857 | 1709.747 | -0.0095  | -0.3  | 4.32 | 14458.2  | 6.92 HUMAN  | GS113  | Chromatin oxidase assembly factor 6 homolog                                  |
| 16929 | dirMS_041712_NAR_60mM_plus.15656.15656.3   | 2 | 7.07 | 1.364E+04 | (K)KTSFVN(K)K T F S V N T /D I C (K) L                     | 138.42 | 487.2426 | 1459.725 | -0.0117  | -8    | 8.59 | 38730.1  | 5.6 HUMAN   | P2D042 | Eukaryotic translation initiation factor 2 subunit 2                         |
| 16930 | dirMS_041712_NAR_60mM_plus.15727.15727.3   | 2 | 7.07 | 1.404E+05 | (K)XSIDSE(K)K S D I D E V I I V L V G S 7 (R) I R          | 138.4  | 530.2831 | 1588.854 | -0.0193  | -12.2 | 4.56 | 72445.7  | 5.07 HUMAN  | PI1021 | 78 kDa glycose-regulated protein                                             |
| 16931 | dirMS_041712_NAR_60mM_plus.20450.20450.3   | 2 | 7.07 | 0.320E+04 | (R)HJPLF(R)T H F P L T A V P /V I S A E (R) I R            | 167.23 | 586.3246 | 1756.963 | -0.004   | -2.3  | 6.75 | 49012.3  | 4.9 HUMAN   | ABM1U8 | Tubulin alpha-4A chain                                                       |
| 16932 | dirMS_041712_NAR_50mM_plus.8817.8817.3     | 2 | 7.07 | 1.686E+05 | (K)KMSD(K)K S D E N L L E G D A S Q C K (L) R I            | 94.13  | 580.505  | 1075.814 | -0.0045  | -3.5  | 3.83 | 24566.2  | 6.02 HUMAN  | EP9070 | Heterogeneous nuclear ribonucleoprotein H                                    |
| 16933 | dirMS_041712_NAR_120mM_minus.17703.17703.3 | 2 | 7.06 | 1.182E+05 | (R)IAGJL(R)K A G K L D P T H V A /L A Q (R) I R            | 151.47 | 625.6385 | 1574.901 | -0.0004  | -0.2  | 6.79 | 23493.8  | 5.45 HUMAN  | MY0510 | Miosin-10                                                                    |
| 16934 | dirMS_041712_NAR_20mM_minus.11666.11666.2  | 2 | 7.06 | 0.177E+05 | (R)IADG(R)D G A /V G I V P A E K (R) I                     | 164.58 | 517.3078 | 1141.61  | -0.0016  | -1.4  | 4.14 | 18466.1  | 5.78 HUMAN  | H385U3 | Pyruvate kinase (Fragment)                                                   |
| 16935 | dirMS_041712_NAR_20mM_minus.14421.14421.2  | 2 | 7.06 | 0.252E+05 | (R)AGSGG(R)R P /G S G I A I L A P L V (L) I R              | 132.68 | 568.8551 | 1136.704 | -0.0007  | -0.7  | 8.8  | 26616.1  | 5.68 HUMAN  | EP9PU0 | Epipkalin                                                                    |
| 16936 | dirMS_041712_NAR_20mM_minus.15338.15338.2  | 2 | 7.06 | 0.564E+05 | M429m.M.(K)MSD(K)K S D E N L L E G D A S Q C K (L) R I     | 135.95 | 582.2765 | 1157.548 | -0.0057  | -0.7  | 8.34 | 26561.6  | 6.75 HUMAN  | EP9PU0 | Epipkalin                                                                    |
| 16937 | dirMS_041712_NAR_40mM_minus.2585.2585.2    | 2 | 7.06 | 0.685E+05 | M299m.M.(K)IAGGAE(K)K A G A /E R E A T A R (L) I           | 97.7   | 488.7279 | 976.448  | -0.0002  | -0.2  | 4.21 | 123097.1 | 5.83 HUMAN  | ASA3E0 | QTE ankyrin domain family member F                                           |
| 16938 | dirMS_041712_NAR_50mM_minus.10479.10479.3  | 2 | 7.06 | 0.152E+05 | (K)SQIHND(K)S Q I /V H I V L V G S 8 (R) I R               | 128.4  | 494.6068 | 1481.807 | -0.0012  | -0.8  | 4.64 | 45508.6  | 5.5 HUMAN   | AKB7Q2 | Heat shock cognate 71 kDa protein                                            |
| 16939 | dirMS_041712_NAR_50mM_minus.11427.11427.3  | 2 | 7.06 | 1.124E+05 | (K)SLSAEK(K)S L A S A E K V E I A /V T /F T (R) I E        | 133.37 | 477.6106 | 1430.821 | -0.0041  | -2.8  | 6.14 | 26661.1  | 7.81 HUMAN  | HY0D69 | Proteasome subunit alpha type cyclin                                         |
| 16940 | dirMS_041712_NAR_50mM_minus.16310.16310.3  | 2 | 7.06 | 0.108E+05 | M463m.M.(K)SNLHK(K)M L N I V P P S /V S F T (K) G          | 160.95 | 504.9453 | 1496.829 | -0.1992  | -1.9  | 8.52 | 60871.9  | 6.3 HUMAN   | BA0D03 | D-3-phosphoglycerate dehydrogenase                                           |
| 16941 | dirMS_041712_NAR_50mM_minus.16485.16485.3  | 2 | 7.06 | 0.879E+04 | (K)ILVLD(R)K S D E N L L E G D A S Q C K (L) R I           | 102.33 | 463.2805 | 1021.831 | -0.0047  | -2.7  | 6.74 | 18952.6  | 6.17 HUMAN  | ANM777 | RanBP2-like and GTP-domain-containing protein 3                              |
| 16942 | dirMS_041712_NAR_50mM_minus.7055.7055.3    | 2 | 7.06 | 0.209E+05 | (K)YVSYG(K)S Y                                             |        |          |          |          |       |      |          |             |        |                                                                              |





|       |                                           |   |      |                  |                                                         |        |          |          |          |       |      |          |             |        |                                                              |
|-------|-------------------------------------------|---|------|------------------|---------------------------------------------------------|--------|----------|----------|----------|-------|------|----------|-------------|--------|--------------------------------------------------------------|
| 17109 | dirMS_041712_NAR_20mM_plus.17134.17134.2  | 2 | 6.99 | 0.841E+04        | (KIVNPIHA)(KQ)N(V)I(P)I A K(A)                          | 189.33 | 490.8283 | 980.65   | -0.001   | -1    | 8.72 | 51212    | 5.84 HUMAN  | ANFQ9  | Septin-8                                                     |
| 17110 | dirMS_041712_NAR_20mM_plus.17564.17564.3  | 3 | 6.99 | 0.213E+05 M90m   | (RIFVGNL)(RI) FV G V L I P P D I T I E E M R(K)         | 192.73 | 625.9762 | 1859.921 | -15.9933 | -0.9  | 4    | 23729.5  | 9.89 HUMAN  | C9Z17  | Non-POU domain-containing octamer-binding protein (Fragment) |
| 17111 | dirMS_041712_NAR_20mM_plus.18438.18438.4  | 4 | 6.99 | 0.176E+05        | (RISSEKSD)(RI) E I E K I S D V S R Q F(K)               | 181.57 | 370.1162 | 1266.255 | -0.001   | -1    | 8.75 | 37064.4  | 9.53 HUMAN  | P2326  | 6.5S ribosomal protein L4                                    |
| 17112 | dirMS_041712_NAR_50mM_plus.7923.7923.2    | 2 | 6.99 | 0.189E+05        | (RIFGVSQ)(R) F G Q(G)V G V P G S(G) P R(I)              | 125.1  | 671.3361 | 1341.666 | -0.009   | -0.7  | 9.75 | 76262.2  | 9.83 HUMAN  | P2326  | Splicing factor, proline- and glutamine-rich                 |
| 17113 | dirMS_041712_NAR_50mM_plus.8736.8736.3    | 3 | 6.99 | 0.740E+05        | (RJAALHS)(R) A A L H S E E I T J A S D V A A T(K)I      | 140.3  | 595.312  | 1783.919 | 0.003    | 1.7   | 5.4  | 23903    | 4.94 HUMAN  | HYD01  | Plectin (Fragment)                                           |
| 17114 | dirMS_041712_NAR_60mM_plus.1815.1815.3    | 3 | 6.99 | 0.194E+05        | (KIDHLEQ)(K) H D Q(L) E V A(L) G V L V(R)               | 153.45 | 403.2318 | 1207.679 | 0.015    | 1.2   | 5.32 | 17732.8  | 5.85 HUMAN  | FSG011 | UB SminoRNA-decapping enzyme                                 |
| 17115 | dirMS_041712_NAR_60mM_plus.7429.7429.3    | 3 | 6.99 | 1.193E+06        | (RISSEKSD)(RI) E I E K I S D V S R Q F(K)               | 181.57 | 452.5501 | 1355.692 | 0.002    | 2.4   | 4.41 | 76262.2  | 9.53 HUMAN  | P2326  | Splicing factor, proline- and glutamine-rich                 |
| 17116 | dirMS_041712_NAR_60mM_plus.9704.9704.2    | 2 | 6.99 | 0.223E+05        | (RIFJATHA)(R) F A T H A N A V A L S V R(N)              | 108.88 | 572.3143 | 1143.627 | -0.0056  | -4.9  | 9.75 | 76262.2  | 9.53 HUMAN  | P2326  | Splicing factor, proline- and glutamine-rich                 |
| 17117 | dirMS_041712_NAR_30mM_minus.12054.12054.2 | 2 | 6.98 | 0.305E+05        | (KIGVLOA)(K) G L V Q(L) A(L) Q K(V)                     | 118.83 | 479.288  | 957.573  | -0.004   | -4.2  | 8.75 | 276046.1 | 6.01 HUMAN  | PA9327 | Fatty acid synthase                                          |
| 17118 | dirMS_041712_NAR_30mM_minus.17791.17791.2 | 2 | 6.98 | 0.301E+05        | (KIAEVLQ)(K) I A E V L Q(L) F D R(T)                    | 156.63 | 513.2571 | 1025.505 | 0.019    | 1.8   | 4.17 | 26991.7  | 5.04 HUMAN  | B7E264 | Myosin light polypeptide 6                                   |
| 17119 | dirMS_041712_NAR_30mM_plus.9601.9601.1    | 1 | 6.98 | 0.122E+05        | (KIAEVLQ)(K) I A E V L Q(L) F D R(T)                    | 156.63 | 429.7546 | 858.504  | -0.0024  | -2.8  | 6.05 | 36474.5  | 5.04 HUMAN  | B7E264 | Endoplasmic reticulum chaperone                              |
| 17120 | dirMS_041712_NAR_40mM_plus.13524.13524.4  | 4 | 6.98 | 1.372E+04        | (KIVTVLQ)(K) I V L Q(L) V V A Q D I D I P(L) Q L(K)K    | 163.58 | 603.1809 | 1808.016 | -0.011   | -6.1  | 8.56 | 23901.9  | 5.8 HUMAN   | FB009  | Catched 0-methyltransferase (Fragment)                       |
| 17121 | dirMS_041712_NAR_40mM_minus.6982.6982.2   | 2 | 6.98 | 0.585E+05        | (RIGYFTTR)(R) YS F I T T T A E R(E)                     | 111.95 | 566.7661 | 1132.527 | -0.002   | -1.8  | 6    | 23901.9  | 5.28 HUMAN  | IL31L9 | Actin, cytoplasmic 2, N-terminally processed (Fragment)      |
| 17122 | dirMS_041712_NAR_60mM_minus.11023.11023.3 | 3 | 6.98 | 1.923E+04        | (RJDGKLV)(R) D G K V L S E V S D I V W(P) K(E)          | 121.25 | 491.927  | 1473.78  | -0.0131  | -4.8  | 4.56 | 56607.4  | 5.37 HUMAN  | FBX04  | Keratin, type II cytoskeletal 8                              |
| 17123 | dirMS_041712_NAR_60mM_minus.13921.13921.3 | 3 | 6.98 | 0.432E+05        | (KIDCGATY)(K) C G A T V V M L G H S E R(S)              | 137.98 | 529.5838 | 1586.738 | -0.0012  | -0.7  | 5.32 | 31075.7  | 5.65 HUMAN  | PE0174 | Triosephosphate isomerase                                    |
| 17124 | dirMS_041712_NAR_120mM_plus.15620.15620.4 | 4 | 6.98 | 2.186E+04        | (KIVGLVQ)(K) V L Q(L) V V A V A P G F G D M R(K)K       | 134.55 | 461.5785 | 1185.055 | -0.123   | -6.6  | 9.99 | 61224.7  | 5.7 HUMAN   | FB009  | 60 kDa heat shock protein, mitochondrial                     |
| 17125 | dirMS_041712_NAR_120mM_plus.8096.8096.3   | 3 | 6.98 | 2.008E+05 M53m   | (KILTDVCN)(K) I L D V C N M R A D P S A R(R)            | 195.85 | 558.2807 | 1647.831 | 15.997   | 1.3   | 8.75 | 37486.1  | 9.03 HUMAN  | P2326  | Heterogeneous nuclear ribonucleoproteins A2/B1               |
| 17126 | dirMS_041712_NAR_20mM_plus.12873.12873.2  | 2 | 6.98 | 0.144E+05        | (RILVVPAS)(R) I V L V P A S Q C G S G L I G(K)          | 161.58 | 714.8991 | 1428.788 | 0.003    | 2.1   | 8.75 | 32621    | 8.75 HUMAN  | B4DLC0 | Poly(C)-binding protein 2                                    |
| 17127 | dirMS_041712_NAR_20mM_plus.12397.12397.4  | 4 | 6.98 | 0.495E+05 M148m  | (RILDTPV)(R) I L D T P V M L(K)                         | 164.77 | 507.7439 | 998.486  | 15.9942  | -0.7  | 4.21 | 37482.1  | 8.75 HUMAN  | EP93G0 | Actin, gamma-enteric smooth muscle                           |
| 17128 | dirMS_041712_NAR_20mM_plus.16340.16340.2  | 2 | 6.98 | 0.843E+04        | (RIRIUNL)(R) I R I V L N L M(K)                         | 183.77 | 467.295  | 933.577  | -0.0031  | -2.1  | 8.63 | 42755    | 7.81 HUMAN  | BZ724  | T-complex protein 1 subunit delta                            |
| 17129 | dirMS_041712_NAR_20mM_plus.18062.18062.2  | 2 | 6.98 | 0.289E+05        | (RILVATN)(R) I L V A T N V F G R(G)                     | 195.05 | 552.3309 | 1103.657 | -0.0026  | -2.4  | 9.75 | 40918.8  | 9.33 HUMAN  | B4DPS5 | HCC20563S isoform CRA_C                                      |
| 17130 | dirMS_041712_NAR_20mM_plus.18405.18405.3  | 3 | 6.98 | 1.188E+05        | (KJIAVSG)(K) I A V I S G V G T R N Y R(Y)K              | 198.77 | 528.617  | 1568.854 | -0.0179  | -11.4 | 9.99 | 49803.3  | 9.21 HUMAN  | B4DE19 | Elongator complex protein 3                                  |
| 17131 | dirMS_041712_NAR_20mM_plus.18962.18962.3  | 3 | 6.98 | 0.634E+04        | (KIDTFLP)(K) I D T F L P D G V D V V K(S)               | 210.03 | 518.9378 | 1554.805 | -0.0062  | -4    | 4.21 | 61363    | 7.83 HUMAN  | CJ0309 | Propionyl-CoA carboxylase beta chain, mitochondrial          |
| 17132 | dirMS_041712_NAR_20mM_plus.10486.10486.2  | 2 | 6.98 | 0.544E+05        | (KICADPQ)(K) I C A D P Q V I D R(K)                     | 118.75 | 447.2386 | 893.466  | 0.0037   | 4.2   | 9.79 | 77999.7  | 9.09 HUMAN  | PS2272 | Heterogeneous nuclear ribonucleoprotein M                    |
| 17133 | dirMS_041712_NAR_30mM_plus.11286.11286.2  | 2 | 6.98 | 0.516E+04        | (RIMGEGE)(R) M G E G E F S D I O S(K)                   | 112.17 | 561.7958 | 1122.51  | 0.0001   | 0.1   | 4.03 | 9225.3   | 9.16 HUMAN  | FB009  | 60S ribosomal protein S21                                    |
| 17134 | dirMS_041712_NAR_30mM_plus.12484.12484.2  | 2 | 6.98 | 0.368E+05        | (RIFYDMM)(R) I F Y D M M V(K)                           | 119.08 | 408.702  | 816.396  | 0.0007   | 0.8   | 5.83 | 15739.2  | 9.3 HUMAN   | FBF6D5 | Dextrin                                                      |
| 17135 | dirMS_041712_NAR_30mM_plus.21792.21792.2  | 2 | 6.98 | 0.213E+05        | (RINSLAAG)(R) I N S L A A G V L Q V Q(S) A(R)           | 170.13 | 707.8889 | 1414.765 | 0.0057   | 4     | 5.84 | 15111    | 6.44 HUMAN  | B4DE64 | Programmed cell death protein 5                              |
| 17136 | dirMS_041712_NAR_40mM_plus.12258.12258.2  | 2 | 6.98 | 0.254E+04        | (KISWVNN)(K) I S W V N N D G L N(K)                     | 140.23 | 610.297  | 1215.589 | -0.0021  | -1.7  | 5.84 | 19395.5  | 5.38 HUMAN  | CJ3959 | DNA (apurinic or apyrimidinic site) lyase (Fragment)         |
| 17137 | dirMS_041712_NAR_50mM_plus.13377.13377.3  | 3 | 6.98 | 0.199E+05        | (RIGYFTTR)(R) YS F I T T T A E R(E) G(Y)R               | 111.95 | 566.7661 | 1132.527 | -0.002   | -1.8  | 6    | 23901.9  | 5.28 HUMAN  | IL31L9 | Actin, cytoplasmic 2, N-terminally processed (Fragment)      |
| 17138 | dirMS_041712_NAR_50mM_plus.14049.14049.3  | 3 | 6.98 | 1.402E+05        | (KITSADTI)(K) I T S A D T I M Q N R(I)                  | 142.52 | 491.6101 | 1474.843 | -0.0004  | -0.3  | 8.41 | 48851.3  | 9.2 HUMAN   | K7E63  | ATP synthase subunit alpha, mitochondrial                    |
| 17139 | dirMS_041712_NAR_50mM_plus.21130.21130.3  | 3 | 6.98 | 0.287E+05        | (KJHSQGH)(K) H S Q G H I G Y I P I L V K(E)             | 180.25 | 593.6536 | 1778.948 | -0.0013  | -0.8  | 6.75 | 20151.2  | 4.58 HUMAN  | GV218  | Heat shock protein HSP 90-alpha (Fragment)                   |
| 17140 | dirMS_041712_NAR_50mM_plus.4984.4984.3    | 3 | 6.98 | 1.104E+05        | (KIVSSAG)(K) I V S S A G E A G A E F I P(R)             | 81.1   | 434.8991 | 1302.654 | -0.0008  | -0.6  | 4.79 | 4801.6   | 11.17 HUMAN | F222W6 | Non-histone chromosomal protein HMG-14                       |
| 17141 | dirMS_041712_NAR_50mM_plus.5163.5163.3    | 3 | 6.98 | 0.730E+05        | (RISSEKSD)(RI) E I E K I S D V S R Q F(K)               | 181.57 | 452.5505 | 1355.692 | -0.0024  | -2.4  | 4.41 | 76262.2  | 9.53 HUMAN  | PS2272 | Heterogeneous nuclear ribonucleoprotein M                    |
| 17142 | dirMS_041712_NAR_50mM_plus.5746.5746.3    | 3 | 6.98 | 1.151E+05 M25m4K | (RIMJLME)(R) I M J L M E L I S E A E I N(K)             | 93.27  | 504.9014 | 1480.702 | 31.9875  | -1.6  | 4.49 | 61018.6  | 9.44 HUMAN  | B4DLV8 | Probable ATP-dependent RNA helicase DDX5                     |
| 17143 | dirMS_041712_NAR_50mM_plus.7471.7471.3    | 3 | 6.98 | 0.103E+04        | (RIVASAP)(R) I V A S A P S P N A Q V A C H L K(K)       | 116.63 | 609.2765 | 1825.832 | -0.017   | -9.3  | 6.79 | 72626.7  | 9.13 HUMAN  | Q14258 | E3 ubiquitin/ubiquitin-like protein 2                        |
| 17144 | dirMS_041712_NAR_50mM_plus.9261.9261.3    | 3 | 6.98 | 1.757E+05 M239m  | (RIMQKEF)(R) I M Q K E F A L A A P S T M(K)             | 115.63 | 522.2726 | 1548.812 | 15.9908  | -2.6  | 8.35 | 32616.5  | 5.18 HUMAN  | AN61L6 | Actin, alpha skeletal muscle                                 |
| 17145 | dirMS_041712_NAR_50mM_plus.16635.16635.3  | 3 | 6.98 | 1.623E+05        | (RITDQKV)(R) I T D Q K V F Q D P L N A(K)               | 143.53 | 456.5782 | 1367.732 | -0.0117  | -8.6  | 8.26 | 17656.4  | 11.01 HUMAN | CJ3W05 | 60S ribosomal protein L24                                    |
| 17146 | dirMS_041712_NAR_60mM_plus.20540.20540.3  | 3 | 6.98 | 0.634E+05        | (RILGFLR)(R) I L G F L R H L P A L V E A Q(K)           | 169.5  | 514.9568 | 1542.843 | 0.0131   | 8.5   | 6.75 | 93378    | 5.74 HUMAN  | Q15149 | Plectin                                                      |
| 17147 | dirMS_041712_NAR_60mM_plus.5761.5761.3    | 3 | 6.98 | 1.191E+05        | (RISSGGG)(R) I S S G G G S G G S D R S G G Y G G D V(S) | 88.07  | 583.5777 | 1748.722 | -0.0033  | -1.9  | 5.68 | 21563.9  | 10.01 HUMAN | K7E82  | TATA-binding protein-associated factor 2N (Fragment)         |
| 17148 | dirMS_041712_NAR_60mM_plus.6554.6554.3    | 3 | 6.98 | 1.689E+05        | (RINKQTS)(R) I N K Q T S V T E P N N L K(K)             | 92.99  | 512.9257 | 1536.765 | -0.0027  | -1.8  | 8.5  | 7945.1   | 11.03 HUMAN | CJ3850 | 60S ribosomal protein L28                                    |
| 17149 | dirMS_041712_NAR_60mM_plus.8825.8825.3    | 3 | 6.98 | 1.573E+05        | (KIELSPQ)(K) I L S P Q D F G I E P K(S)                 | 100.45 | 445.8862 | 1335.643 | 0.0014   | 1     | 4.41 | 84573.3  | 6.5 HUMAN   | Q04609 | Glutamate carboxylase protein 2                              |
| 17150 | dirMS_041712_NAR_60mM_plus.11388.11388.3  | 3 | 6.97 | 0.216E+05 M159m  | (RISSEKSD)(RI) E I E K I S D V S R Q F(K)               | 181.57 | 452.5505 | 1355.692 | -0.0024  | -2.4  | 4.41 | 76262.2  | 9.53 HUMAN  | FHSB97 | Heat shock protein 75 kDa, mitochondrial                     |
| 17151 | dirMS_041712_NAR_30mM_plus.11839.11839.2  | 2 | 6.97 | 1.001E+05        | (RISGLPL)(R) I S G L P L A D I Q(K)                     | 116.68 | 497.265  | 993.525  | -0.0024  | -2.4  | 5.5  | 17045.4  | 4.25 HUMAN  | HOV10  | Endoplasmic reticulum protein 29                             |
| 17152 | dirMS_041712_NAR_30mM_minus.15180.15180.2 | 2 | 6.97 | 0.488E+05        | (RIVYVNS)(R) I V Y V N S V N L V(K)                     | 136.3  | 573.8282 | 1146.652 | -0.0026  | -2.3  | 8.59 | 14227.3  | 7.81 HUMAN  | ETQ06E | T-complex protein 1 subunit alpha                            |
| 17153 | dirMS_041712_NAR_30mM_plus.6801.6801.2    | 2 | 6.97 | 0.151E+04        | (KJAMEAV)(K) J A M E A V A A Q G A(K)                   | 91.35  | 488.2495 | 975.493  | -0.0011  | -1.1  | 6.05 | 28936.8  | 9.22 HUMAN  | P15259 | Phosphoglycerate mutase 2                                    |
| 17154 | dirMS_041712_NAR_40mM_plus.14640.14640.3  | 3 | 6.97 | 0.163E+05        | (RISVAHR)(R) I S V A H R V L S F P I P R I P(K)         | 171.28 | 614.3477 | 1815.04  | 15.9888  | -3.5  | 4.67 | 31696.3  | 6.72 HUMAN  | B4E320 | Phosphoribosyl pyrophosphate synthase-associated protein 2   |
| 17155 | dirMS_041712_NAR_50mM_plus.7017.7017.3    | 3 | 6.97 | 0.204E+05        | (KISVLEKE)(K) I S V L E K E F L R T E F A K(K)          | 106.92 | 596.2904 | 1786.845 | 0.0113   | 6.3   | 4.08 | 19284.3  | 5.23 HUMAN  | CJ3VCT | DNA (apurinic or apyrimidinic site) lyase (Fragment)         |
| 17156 | dirMS_041712_NAR_50mM_plus.8984.8984.3    | 3 | 6.97 | 0.236E+05        | (RIVMLGE)(R) I V M L G E A T E N P A D X P G T I R(G)   | 118.3  | 595.9744 | 1785.916 | -0.0077  | -4.3  | 6.04 | 15431.7  | 9 HUMAN     | ETL0E0 | Nucleoside diphosphate kinase A                              |
| 17157 | dirMS_041712_NAR_50mM_minus.9554.9554.2   | 2 | 6.97 | 1.715E+05        | (RHDGKLV)(R) D G K L V I S E S D V L P(K)               | 121.97 | 373.927  | 1473.78  | -0.014   | -0.9  | 4.56 | 56607.4  | 5.37 HUMAN  | FBX04  | Keratin, type II cytoskeletal 8                              |
| 17158 | dirMS_041712_NAR_60mM_plus.16263.16263.3  | 3 | 6.97 | 0.278E+05        | (RIGHPSTI)(R) I G H P S T I A D L Q(L) R(K)             | 150.57 | 498.6051 | 1493.796 | 0.0409   | 3.3   | 5.32 | 13564.4  | 5.9 HUMAN   | FB2828 | Serine/threonine protein kinase D1 (Fragment)                |
| 17159 | dirMS_041712_NAR_120mM_plus.7988.7988.2   | 2 | 6.97 | 0.278E+05        | (RIGHPSTI)(R) I G H P S T I A D L Q(L) R(K)             | 150.57 | 498.2696 | 1493.807 | -0.0047  | -2.4  | 6.04 | 39564    | 5.84 HUMAN  | EP9A3  | Gial fibrillary acidic protein                               |
| 17160 | dirMS_041712_NAR_120mM_plus.4128.4128.3   | 3 | 6.97 | 1.152E+07 M310m  | (RITKTEISE)(R) I T K T E I S I Y M N R(K)               | 69.72  | 408.8687 | 1208.594 | 15.9976  | 2.2   | 5.81 | 37296.3  | 5.3 HUMAN   | FBV064 | Keratin, type II cytoskeletal 8                              |
| 17161 | dirMS_041712_NAR_120mM_plus.5345.5345.3   | 3 | 6.97 | 0.385E+04        | (RITGYVST)(R) I G Y V S T S C H K(T)                    | 81.43  | 414.1962 | 1240.563 | 0.0114   | 9.2   | 8.28 | 38077.6  | 8.9 HUMAN   | PO9668 | Pro-cathepsin H                                              |
| 17162 | dirMS_041712_NAR_20mM_plus.8285.8285.2    | 2 | 6.97 | 0.935E+04        | (RILANTNS)(R) I L A N T N S A P D A R(K)                | 127.33 | 565.806  | 1130.605 | -0.0005  | -0.4  | 5.84 | 26233.5  | 10.95 HUMAN | B4DQ51 | Microtubule-associated protein                               |
| 17163 | dirMS_041712_NAR_20mM_plus.10931.10931.2  | 2 | 6.97 | 0.705E+05        | (KIFYFGG)(K) I F Y F G G F I V G V A V A(K)             | 124.57 | 471.745  | 964.483  | -0.0011  | -1.1  | 8.75 | 31075.7  | 5.65 HUMAN  | PE0174 | Triosephosphate isomerase                                    |
| 17164 | dirMS_041712_NAR_20mM_plus.8392.8392.2    | 2 | 6.97 | 0.224E+05        | (RIVLAPGE)(R) I V L A P G E A P A R(K)                  | 97.73  | 455.2602 | 990.515  | -0.0021  | -2.3  | 5.97 | 36856.1  | 8.55 HUMAN  | HOY14A | Scrub typhus agent                                           |
| 17165 | dirMS_041712_NAR_40mM_plus.11467.11467.2  | 2 | 6.97 | 1.888E+04        | (KJQRIDEF)(K) Q R I D E F A I M(C)                      | 138.3  | 569.7569 | 1138.52  | -0.0132  | -11.6 | 4.14 | 52734.7  | 9.88 HUMAN  | FHS147 | Radixin                                                      |





|       |                                            |   |      |           |                                                  |        |          |          |           |       |      |          |       |       |        |                                                                              |
|-------|--------------------------------------------|---|------|-----------|--------------------------------------------------|--------|----------|----------|-----------|-------|------|----------|-------|-------|--------|------------------------------------------------------------------------------|
| 17436 | dirMS_041712_NAR_40mM_minus.9389.9389.3    | 3 | 6.86 | 0.999E-04 | (KJAA5DIA(K)A J S D I A/M T E W/P P T H F I R L) | 138.25 | 607.3174 | 1819.937 | 0.0002    | 0.3   | 5.32 | 12926.1  | 4.4   | HUMAN | K7M20  | 14-3-3 protein epsilon (Fragment)                                            |
| 17437 | dirMS_041712_NAR_60mM_minus.11548.11548.3  | 3 | 6.86 | 0.297E+05 | T1021                                            | 123.92 | 418.2174 | 1049.545 | 2033.0297 | 10.7  | 5.75 | 31075.9  | 5.99  | HUMAN | G5E81  | Cytokine-inducible SH2-containing protein, isoform CRA_c                     |
| 17438 | dirMS_041712_NAR_30mM_plus.6318.6318.3     | 3 | 6.86 | 1.197E+04 | M172m                                            | 93.25  | 561.5742 | 1324.827 | 1558.88   | -4.7  | 8.56 | 13565.6  | 4.7   | HUMAN | PTPFR1 | Protein tyrosine phosphatase 1 (Fragment)                                    |
| 17439 | dirMS_041712_NAR_120mM_plus.7773.7773.3    | 3 | 6.86 | 0.473E+05 |                                                  | 94.1   | 462.218  | 1384.627 | 0.0121    | 8.7   | 6.46 | 48340.6  | 8.84  | HUMAN | G0766  | K11 domain-containing RNA-binding, signal transduction-associated protein 1  |
| 17440 | dirMS_041712_NAR_20mM_plus.8634.8634.2     | 2 | 6.86 | 0.629E-04 |                                                  | 129.63 | 647.3743 | 1491.744 | -0.0025   | -1.7  | 4.14 | 54213.9  | 7.33  | HUMAN | BAE363 | Phenylalanine-tRNA ligase alpha subunit                                      |
| 17441 | dirMS_041712_NAR_30mM_plus.5744.5744.2     | 2 | 6.86 | 0.648E-04 |                                                  | 83.85  | 423.2808 | 1245.559 | -0.005    | -4    | 3.91 | 73939.3  | 6.88  | HUMAN | G02445 | Far upstream element-binding protein 2                                       |
| 17442 | dirMS_041712_NAR_20mM_plus.6493.6493.2     | 2 | 6.86 | 0.182E+05 |                                                  | 91.78  | 462.7407 | 924.979  | -0.002    | -4.5  | 8.26 | 30125.4  | 7.91  | HUMAN | E99462 | Palmityl-coated protein thioesterase 1 (Fragment)                            |
| 17443 | dirMS_041712_NAR_40mM_plus.6074.6074.2     | 2 | 6.86 | 0.178E-04 |                                                  | 94.57  | 565.7355 | 1132.448 | 0.0161    | 14.2  | 5.83 | 25655.9  | 8.84  | HUMAN | Q13242 | Serine/arginine-rich splicing factor 9                                       |
| 17444 | dirMS_041712_NAR_50mM_plus.11364.11364.3   | 3 | 6.86 | 1.413E+05 |                                                  | 127.05 | 508.9188 | 1524.74  | 0.0016    | 1     | 5.71 | 20685.4  | 9.18  | HUMAN | BOQV7  | SUMO-conjugating enzyme UBC9                                                 |
| 17445 | dirMS_041712_NAR_50mM_plus.11696.11696.3   | 3 | 6.86 | 1.131E+05 |                                                  | 137.28 | 585.9784 | 1755.924 | -0.0029   | -1.7  | 4.56 | 16443.6  | 10.45 | HUMAN | PT6263 | 40S ribosomal protein S14                                                    |
| 17446 | dirMS_041712_NAR_50mM_plus.17982.17982.3   | 3 | 6.86 | 0.905E+04 |                                                  | 162.53 | 617.9711 | 1851.901 | -0.0026   | -1.4  | 4.68 | 39089.4  | 7.08  | HUMAN | C3634  | Pyruvate dehydrogenase E1 component subunit beta, mitochondrial              |
| 17447 | dirMS_041712_NAR_50mM_plus.10207.10207.2   | 2 | 6.86 | 0.203E+06 |                                                  | 111.9  | 519.7825 | 1231.127 | -0.0008   | -1.1  | 8.35 | 21791.7  | 6.88  | HUMAN | CN217  | Non-PCU domain-containing c-terminus-binding protein (Fragment)              |
| 17448 | dirMS_041712_NAR_60mM_plus.15855.15855.3   | 3 | 6.86 | 0.400E+04 |                                                  | 138.1  | 429.248  | 1285.738 | -0.0081   | -6.3  | 9.6  | 31392.3  | 6.77  | HUMAN | BD4N5  | S-adenosylmethionine synthase                                                |
| 17449 | dirMS_041712_NAR_120mM_minus.10769.10769.3 | 3 | 6.85 | 0.920E+05 |                                                  | 113.52 | 410.858  | 1230.551 | 0.0088    | 7.1   | 9.75 | 14391.8  | 4.99  | HUMAN | G3V461 | Creatine kinase B-type (Fragment)                                            |
| 17450 | dirMS_041712_NAR_30mM_minus.5827.5827.2    | 2 | 6.85 | 0.123E+05 | M145m                                            | 86.58  | 514.726  | 1028.447 | -0.0018   | -1.8  | 5.66 | 18946.7  | 9.13  | HUMAN | BD4P17 | Cellular nucleic acid-binding protein                                        |
| 17451 | dirMS_041712_NAR_20mM_plus.7366.7366.2     | 2 | 6.85 | 0.347E+05 | M154m                                            | 94.68  | 516.587  | 1030.423 | 31.9881   | -1.6  | 2.45 | 67721.3  | 5.54  | HUMAN | G23656 | Interferon-induced guanylate-binding protein 2                               |
| 17452 | dirMS_041712_NAR_40mM_plus.6618.6618.2     | 2 | 6.85 | 0.402E+05 |                                                  | 107.5  | 404.2037 | 807.359  | 0.0006    | 0.7   | 4.21 | 48845.9  | 4.72  | HUMAN | CNAM86 | Keratin, type I cuticular HA5                                                |
| 17453 | dirMS_041712_NAR_50mM_minus.14445.14445.3  | 3 | 6.85 | 1.833E-04 |                                                  | 149.87 | 574.9724 | 1722.891 | 0.0118    | 6.8   | 4.41 | 267687.4 | 4.97  | HUMAN | P12270 | Nucleoporin TPR                                                              |
| 17454 | dirMS_041712_NAR_50mM_plus.15301.15301.3   | 3 | 6.85 | 1.227E+05 |                                                  | 154.58 | 469.2729 | 1405.805 | -0.0008   | -0.6  | 6.07 | 49564    | 5.84  | HUMAN | E9PAK3 | Gli3 fibrillary acidic protein                                               |
| 17455 | dirMS_041712_NAR_60mM_minus.10866.10866.3  | 3 | 6.85 | 1.216E+05 |                                                  | 121    | 555.2923 | 1657.869 | -0.0007   | -4    | 8.72 | 18880.7  | 7.92  | HUMAN | K7L1M0 | Protein D1-1                                                                 |
| 17456 | dirMS_041712_NAR_60mM_plus.10996.11041.3   | 3 | 6.85 | 1.549E+05 | M121m                                            | 121.17 | 488.5177 | 1447.721 | 15.9988   | 2.6   | 4.32 | 55323    | 6.02  | HUMAN | BD4P18 | T-complex protein 1 subunit zeta                                             |
| 17457 | dirMS_041712_NAR_60mM_plus.13216.13216.3   | 3 | 6.85 | 1.281E+05 | M194m                                            | 133.93 | 606.9793 | 1802.932 | 15.9917   | -1.8  | 4.41 | 35935.5  | 6.2   | HUMAN | OBVM0  | Colicoid-like domain-containing protein 50                                   |
| 17458 | dirMS_041712_NAR_60mM_minus.14831.14831.3  | 3 | 6.85 | 1.272E+05 |                                                  | 147.8  | 601.6438 | 1802.932 | -0.0148   | -8.2  | 4.41 | 35935.5  | 6.2   | HUMAN | OBVM0  | Colicoid-like domain-containing protein 50                                   |
| 17459 | dirMS_041712_NAR_50mM_plus.15040.15040.3   | 3 | 6.85 | 1.329E+05 |                                                  | 146.37 | 582.9375 | 1688.86  | -0.0015   | -4.9  | 6.07 | 26494.9  | 6.5   | HUMAN | BSM0P5 | GTP-binding nuclear protein Ran                                              |
| 17460 | dirMS_041712_NAR_50mM_plus.17935.17935.3   | 3 | 6.85 | 1.125E-04 |                                                  | 161.33 | 580.9568 | 1740.853 | -0.0006   | -1.8  | 5.75 | 49012.3  | 4.9   | HUMAN | ABM10E | Tubulin alpha-4A chain                                                       |
| 17461 | dirMS_041712_NAR_60mM_minus.18195.18195.3  | 3 | 6.85 | 1.546E+05 |                                                  | 103.17 | 462.9345 | 1272.793 | -0.0036   | -2.9  | 5.99 | 83723.6  | 5.55  | HUMAN | P13101 | X-ray repair cross-complementing protein 5                                   |
| 17462 | dirMS_041712_NAR_60mM_minus.18562.18562.3  | 3 | 6.85 | 1.139E+05 |                                                  | 165.08 | 480.2832 | 1438.838 | -0.0026   | -1.8  | 5.86 | 44954.5  | 8.44  | HUMAN | AK823  | 26S protease regulatory subunit 8                                            |
| 17463 | dirMS_041712_NAR_50mM_plus.5500.5500.3     | 3 | 6.85 | 0.122E+05 | M480m                                            | 86.85  | 516.235  | 1530.679 | 15.9939   | -0.6  | 5.32 | 57829.5  | 6.04  | HUMAN | F87871 | T-complex protein 1 subunit beta                                             |
| 17464 | dirMS_041712_NAR_120mM_plus.10210.10210.3  | 3 | 6.85 | 1.143E+05 |                                                  | 107.48 | 515.48   | 1201.562 | -0.0026   | -2.3  | 7.62 | 20460    | 6.07  | HUMAN | G02407 | Eglopin                                                                      |
| 17465 | dirMS_041712_NAR_120mM_plus.11284.11284.3  | 3 | 6.85 | 1.223E+05 |                                                  | 112.6  | 530.2156 | 1588.739 | 0.0121    | 0.8   | 6.07 | 87447.6  | 6.41  | HUMAN | Q15437 | Protein transport protein sec2E3B                                            |
| 17466 | dirMS_041712_NAR_120mM_plus.6140.6140.2    | 2 | 6.85 | 1.338E+05 |                                                  | 86.27  | 677.815  | 1354.623 | -0.0006   | -0.5  | 4.56 | 32616.5  | 5.18  | HUMAN | ANL176 | Actin, alpha skeletal muscle                                                 |
| 17467 | dirMS_041712_NAR_20mM_plus.9686.9686.2     | 2 | 6.85 | 0.634E-04 |                                                  | 138.03 | 478.793  | 956.577  | 0.0012    | 1.3   | 8.75 | 12480.3  | 9.05  | HUMAN | F5H214 | Acyl-coenzyme A thioesterase 13                                              |
| 17468 | dirMS_041712_NAR_40mM_plus.9507.9507.3     | 3 | 6.85 | 0.347E+05 | M145m                                            | 91.3   | 475.8808 | 1377.623 | -0.0037   | -2.7  | 9.35 | 37261.3  | 6.22  | HUMAN | Q13243 | Heterogeneous nuclear ribonucleoproteins A2/B1                               |
| 17469 | dirMS_041712_NAR_50mM_plus.10141.10141.3   | 3 | 6.85 | 1.176E+05 |                                                  | 121.43 | 544.624  | 1631.86  | -0.0024   | -1.5  | 4.68 | 139883.7 | 8.06  | HUMAN | PS3821 | Customer subunit alpha                                                       |
| 17470 | dirMS_041712_NAR_50mM_plus.13777.13777.3   | 3 | 6.85 | 0.305E+05 |                                                  | 140.47 | 453.2622 | 1303.773 | -0.0019   | -1.8  | 4.8  | 141266   | 5.5   | HUMAN | ABMY36 | Dynactin subunit 1                                                           |
| 17471 | dirMS_041712_NAR_50mM_plus.14207.14207.3   | 3 | 6.85 | 1.351E+05 |                                                  | 142.5  | 462.6094 | 1388.815 | -0.0015   | -1.1  | 8.59 | 23167    | 8.94  | HUMAN | EL1A98 | 6-phosphofructokinase type C                                                 |
| 17472 | dirMS_041712_NAR_50mM_plus.15484.15484.3   | 3 | 6.85 | 1.656E+05 |                                                  | 149.08 | 497.9873 | 1469.779 | 0.0014    | -0.9  | 9.7  | 55361.8  | 6.84  | HUMAN | G5E452 | Protein disulfide isomerase family A, member 3, isoform CRA_b                |
| 17473 | dirMS_041712_NAR_50mM_plus.16956.16956.3   | 3 | 6.85 | 1.524E+05 |                                                  | 157.05 | 655.0249 | 1975.064 | -0.0009   | -5    | 6.5  | 51999.4  | 8.84  | HUMAN | F1U3   | Uncharacterized protein                                                      |
| 17474 | dirMS_041712_NAR_50mM_plus.5765.5765.3     | 3 | 6.85 | 1.972E-04 |                                                  | 93.32  | 640.303  | 1930.935 | -0.0219   | -11.3 | 4.56 | 22655.1  | 9.45  | HUMAN | Q898R8 | Partner of Y14 and mago                                                      |
| 17475 | dirMS_041712_NAR_50mM_plus.9105.9105.3     | 3 | 6.85 | 1.191E+05 |                                                  | 115.42 | 504.328  | 1512.754 | 0.0028    | 1.9   | 4.31 | 288852.1 | 5.33  | HUMAN | E9PEM5 | Lipopolysaccharide-responsive and beige-like anchor protein                  |
| 17476 | dirMS_041712_NAR_60mM_plus.12770.12770.3   | 3 | 6.85 | 1.106E+06 |                                                  | 123.83 | 481.263  | 1441.776 | 0.0013    | -0.9  | 5.96 | 16602.2  | 10.31 | HUMAN | F93019 | 40S ribosomal protein S19                                                    |
| 17477 | dirMS_041712_NAR_50mM_plus.16375.16375.3   | 3 | 6.85 | 0.627E+05 |                                                  | 142.97 | 548.584  | 1551.235 | -0.0006   | -2.3  | 6.07 | 2525.7   | 6.17  | HUMAN | Q13244 | ATP synthase subunit alpha, mitochondrial                                    |
| 17478 | dirMS_041712_NAR_120mM_plus.14773.14773.2  | 2 | 6.84 | 1.326E+05 |                                                  | 150.78 | 412.8849 | 1236.317 | -0.003    | 2.4   | 6.07 | 83605    | 4.97  | HUMAN | Q89238 | Heat shock protein HSP 90-beta                                               |
| 17479 | dirMS_041712_NAR_20mM_minus.7293.7293.2    | 2 | 6.84 | 0.399E-04 |                                                  | 130.68 | 576.8612 | 1532.719 | -0.0036   | -2.3  | 4.09 | 17219.2  | 5.69  | HUMAN | E9P815 | 14-3-3 protein theta (Fragment)                                              |
| 17480 | dirMS_041712_NAR_20mM_plus.9325.9325.2     | 2 | 6.84 | 0.279E+05 |                                                  | 122.42 | 660.3388 | 1319.67  | 0.0001    | 0.1   | 5.88 | 43773.3  | 5.26  | HUMAN | F8V279 | Keratin, type I cytoskeletal 18                                              |
| 17481 | dirMS_041712_NAR_30mM_minus.15215.15215.2  | 2 | 6.84 | 0.594E+05 |                                                  | 135.35 | 522.2529 | 1043.499 | 0.0006    | 0.6   | 8    | 1740.1   | 16.08 | HUMAN | HYM022 | Peptidyl-prolyl cis-trans isomerase FKBP4, N-terminally processed (Fragment) |
| 17482 | dirMS_041712_NAR_30mM_minus.15686.15686.2  | 2 | 6.84 | 0.270E-04 | M142m                                            | 138.55 | 640.3185 | 1263.64  | 15.9895   | -4.2  | 6.05 | 266161   | 5.68  | HUMAN | E9PFDU | Eglopin                                                                      |
| 17483 | dirMS_041712_NAR_30mM_minus.5102.5102.2    | 2 | 6.84 | 0.207E+05 |                                                  | 80.68  | 413.2023 | 825.399  | -0.0016   | -1.9  | 4.53 | 31330.8  | 9.26  | HUMAN | E9P082 | Malate dehydrogenase, mitochondrial                                          |
| 17484 | dirMS_041712_NAR_30mM_minus.7636.7636.2    | 2 | 6.84 | 0.848E+05 |                                                  | 95.77  | 419.2279 | 837.447  | -0.002    | 2.4   | 8.75 | 25232.1  | 8.4   | HUMAN | F5HW3  | T-complex protein 1 subunit delta                                            |
| 17485 | dirMS_041712_NAR_40mM_minus.14434.14434.3  | 3 | 6.84 | 1.200E+05 |                                                  | 109.47 | 567.6813 | 1701.031 | -0.0016   | -4.9  | 8.59 | 153084.9 | 5.55  | HUMAN | G0P229 | Eukaryotic initiation factor 4                                               |
| 17486 | dirMS_041712_NAR_50mM_minus.10868.10868.3  | 3 | 6.84 | 1.214E+05 |                                                  | 129.57 | 551.9474 | 1659.823 | -0.0017   | -4.3  | 4.33 | 38080.7  | 6.84  | HUMAN | F1U3   | Uncharacterized protein                                                      |
| 17487 | dirMS_041712_NAR_50mM_minus.15756.15756.3  | 3 | 6.84 | 0.260E+05 |                                                  | 168.5  | 458.6218 | 1373.852 | -0.0007   | -0.5  | 6.74 | 14649.8  | 8     | HUMAN | K7EM77 | Halooxid dehalogenase-like hydrolase domain-containing protein 2 (Fragment)  |
| 17488 | dirMS_041712_NAR_60mM_minus.10327.10327.3  | 3 | 6.84 | 0.276E+05 |                                                  | 116.92 | 550.2838 | 1648.844 | -0.0073   | -4.4  | 8.51 | 258215.9 | 5.48  | HUMAN | E7N854 | Filamin-B                                                                    |
| 17489 | dirMS_041712_NAR_60mM_minus.14238.14238.3  | 3 | 6.84 | 0.171E+05 | M145m                                            | 139.13 | 500.914  | 1500.726 | 0.0011    | 0.7   | 6.74 | 26760.7  | 5.95  | HUMAN | Q13308 | Acetyl-CoA carboxylase 1                                                     |
| 17490 | dirMS_041712_NAR_120mM_plus.2363.2363.2    | 2 | 6.84 | 1.341E+05 |                                                  | 178.88 | 512.772  | 1556.908 | -0.0013   | -2.3  | 6.07 | 2525.7   | 6.04  | HUMAN | Q13245 | 60 kDa heat shock protein, mitochondrial (Fragment)                          |
| 17491 | dirMS_041712_NAR_30mM_plus.12290.12290.2   | 2 | 6.84 | 0.630E-04 |                                                  | 157.88 | 427.7587 | 854.509  | 0.0007    | 0.8   | 5.84 | 27150.8  | 7.95  | HUMAN | Q9P914 | 3-hydroxyacyl-CoA dehydrogenase type 2                                       |
| 17492 | dirMS_041712_NAR_20mM_plus.14512.14512.2   | 2 | 6.84 | 1.687E-04 |                                                  | 170.07 | 58       |          |           |       |      |          |       |       |        |                                                                              |



|       |                                            |      |                 |                                                  |        |          |          |          |       |      |          |       |       |        |                                                                       |
|-------|--------------------------------------------|------|-----------------|--------------------------------------------------|--------|----------|----------|----------|-------|------|----------|-------|-------|--------|-----------------------------------------------------------------------|
| 17654 | dirMS_041712_NAR_60mM_plus.16474.16474.3   | 6.77 | 0.349E+05       | (RVHVGQV(RV)HV)G Q V I/V M/S I RT)               | 14405  | 418.2478 | 1252.719 | 0.0094   | 7.5   | 9.73 | 18819.6  | 10.31 | HUMAN | FBW7C6 | 60S ribosomal protein L10                                             |
| 17655 | dirMS_041712_NAR_60mM_plus.6865.6865.2     | 6.77 | 0.245E+05       | (RIQELRH(R)M)E(L)H/D E M/Q(K)R)                  | 9428   | 708.8155 | 1164.625 | -0.0009  | -0.6  | 4.75 | 26419.2  | 5.1   | HUMAN | HD9R97 | Splicing factor, proline- and glutamine-rich (Fragment)               |
| 17656 | dirMS_041712_NAR_30mM_plus.10375.10375.2   | 6.76 | 0.144E+05       | (RQVQVH(R)Y)YV/VV/V                              | 90.3   | 1231.645 | 1231.645 | -0.0009  | -0.3  | 4.37 | 12316.45 | 4.37  | HUMAN | AP09V5 | Bromodomain-containing protein 5 (Fragment)                           |
| 17657 | dirMS_041712_NAR_30mM_plus.4544.4544.2     | 6.76 | 0.920E+05       | (KIQESEG(K)K)A(S)E G P/L V/K(G)                  | 75.6   | 415.2335 | 829.441  | -0.0017  | -2    | 6    | 31718.5  | 7.17  | HUMAN | EF7474 | Glyceraldehyde 3-phosphate dehydrogenase                              |
| 17658 | dirMS_041712_NAR_30mM_minus.7880.7880.2    | 6.76 | 0.546E+05       | (KIQTQLA(K)Q)Q/LA/V/Q C/Q R(K)                   | 96.65  | 552.2842 | 1103.563 | -0.0015  | -1.3  | 9.41 | 9740.1   | 10.43 | HUMAN | HDYFQ2 | Peptidyl-cis-trans isomerase FKBP4, N-terminally processed (Fragment) |
| 17659 | dirMS_041712_NAR_30mM_plus.9255.9255.2     | 6.76 | 0.335E+05       | (KICADAG(K)K)A(I)A/D G L/N(K)(G)                 | 104.88 | 481.2466 | 961.477  | -0.0008  | -9.1  | 5.84 | 13945.8  | 6.08  | HUMAN | PA9773 | Histidine triad nucleotide-binding protein 1                          |
| 17660 | dirMS_041712_NAR_50mM_minus.10621.10621.3  | 6.76 | 0.537E+05       | (KIQHASE(K)K)E A(S)Y S/E L/E F/T E/T P/R(K)      | 127.43 | 665.3152 | 1993.917 | 0.0069   | 8.5   | 4.75 | 95851.5  | 4.57  | HUMAN | ES6CW1 | Bromodomain-containing protein 5                                      |
| 17661 | dirMS_041712_NAR_50mM_plus.11685.11685.3   | 6.76 | 0.181E+04       | (RIELJNSN(R)E)L/S/V/S/D A L/D K I(R)             | 143.54 | 520.9445 | 1560.823 | -0.0038  | -2.5  | 4.56 | 20151.2  | 4.58  | HUMAN | GV3D18 | Heat shock protein HSP90-alpha (Fragment)                             |
| 17662 | dirMS_041712_NAR_50mM_minus.13631.13631.3  | 6.76 | 0.540E+05       | (KIQLOME(K)Q)M(V)A/H V/P G/R G(V)                | 145.62 | 540.2947 | 1618.873 | -0.0038  | -2.4  | 6.75 | 20859.5  | 4.85  | HUMAN | JK5Z25 | Eukaryotic initiation factor 4A1 (Fragment)                           |
| 17663 | dirMS_041712_NAR_30mM_minus.15063.15063.3  | 6.76 | 0.351E+04       | (KIQFMSN(K)K)F I(S) L/V/L/H Q R(K)               | 143.9  | 500.2735 | 1498.813 | -0.0065  | -4.4  | 9.8  | 40178.9  | 9.55  | HUMAN | BK3R77 | Zinc finger protein with KRAB and SCAN domains 1                      |
| 17664 | dirMS_041712_NAR_120mM_plus.10003.10003.3  | 6.76 | 0.275E+05       | (KIQKBAE(K)M)Q(A)S I E/G/S G P K V/E A(K)F)      | 109.2  | 593.657  | 1172.958 | -0.001   | -0.6  | 8.25 | 32745.6  | 4.64  | HUMAN | PG0748 | Nucleophosmin                                                         |
| 17665 | dirMS_041712_NAR_120mM_plus.1282.11282.3   | 6.76 | 0.591E+05       | (KIQSFQHQ(R)K)P/Q H/L Q/G S G R(K)               | 112.63 | 492.985  | 1292.78  | -0.0007  | -0.4  | 9.49 | 10729.7  | 6.09  | HUMAN | Q9YFW1 | Thyroid hormone receptor-associated protein 2                         |
| 17666 | dirMS_041712_NAR_20mM_plus.6763.6763.2     | 6.76 | 0.268E+05 52245 | (KIQALDE(K)K)A(I)D L K(R)                        | 111.43 | 425.2226 | 645.377  | 203.6609 | -21.7 | 5.88 | 26203.6  | 8.83  | HUMAN | Q9NP81 | 5'(3')-deoxyribonucleotidase, mitochondrial                           |
| 17667 | dirMS_041712_NAR_20mM_plus.8995.9049.2     | 6.76 | 0.443E+05       | (KIQPELNE(K)Q)I/P/E L N G L(K)                   | 133.17 | 435.2573 | 869.509  | -0.0018  | -2    | 5.97 | 31718.5  | 7.17  | HUMAN | LE7U74 | Glyceraldehyde 3-phosphate dehydrogenase                              |
| 17668 | dirMS_041712_NAR_30mM_plus.12275.12275.2   | 6.76 | 0.124E+06       | (RIQIGAVG(R)G)A/V A/S G A S RT)                  | 118.1  | 479.2725 | 957.548  | -0.0099  | -10.3 | 9.75 | 190422.9 | 8.68  | HUMAN | AD4D20 | SUN domain-containing protein 1                                       |
| 17669 | dirMS_041712_NAR_30mM_plus.20128.20128.2   | 6.76 | 0.207E+04       | (RISPTWRF(K)S)P/T W/G P V R(K)                   | 159.2  | 581.2838 | 1444.837 | 0.005    | 5     | 9.47 | 112927.8 | 6.09  | HUMAN | FR3417 | General transcription factor Ii                                       |
| 17670 | dirMS_041712_NAR_30mM_plus.9413.9413.2     | 6.76 | 0.450E+05       | (KIQATDAS(K)A)T/F/D A/I S(KT)                    | 103.12 | 426.7266 | 852.446  | -0.0009  | -0.3  | 5.88 | 25381.9  | 10.49 | HUMAN | EP9007 | 40S ribosomal protein S2                                              |
| 17671 | dirMS_041712_NAR_40mM_plus.9860.9860.2     | 6.76 | 0.229E+05       | (KIQEFAW(K)K)Q I/F A/V W R(K)                    | 122.8  | 418.706  | 836.405  | -0.0002  | -0.3  | 6.1  | 19924.8  | 9.99  | HUMAN | GU2111 | 40S ribosomal protein S10                                             |
| 17672 | dirMS_041712_NAR_50mM_plus.11421.11421.3   | 6.76 | 0.261E+05       | (KIQATPPE(K)K)A(T)I/P/D E R A V E F K(L)         | 127.75 | 589.2842 | 1765.843 | -0.0045  | -2.5  | 4.41 | 45578.2  | 7.83  | HUMAN | B4D1L2 | isochtrate dehydrogenase (NADP)                                       |
| 17673 | dirMS_041712_NAR_50mM_plus.19025.19025.3   | 6.76 | 0.854E+05       | (RIQCPJOL(R)R)E R P/D L T/G U/S/LU/L P L E R(K)  | 167.68 | 643.0148 | 1927.032 | -0.0019  | -1    | 6.07 | 53377.8  | 5.74  | HUMAN | Q15149 | Plectin                                                               |
| 17674 | dirMS_041712_NAR_50mM_plus.20352.20352.3   | 6.76 | 0.104E+04       | (KIQSSVLE(K)S)S/V/L/E/S I V G R/L V D L P/R(K)   | 175.6  | 547.6436 | 1640.933 | -0.0167  | -10.2 | 5.79 | 19884.2  | 4.87  | HUMAN | B4D0C3 | Dynamin-1-like protein                                                |
| 17675 | dirMS_041712_NAR_60mM_plus.11015.11015.3   | 6.76 | 0.644E+05       | (KIQSVYSH(K)G)S/V/V/S I H S G F R(K)             | 115.62 | 432.8835 | 1296.633 | 0.0028   | 2.2   | 8.75 | 30944.2  | 6.52  | HUMAN | BIQ2N1 | ATP-dependent RNA helicase DDX39A                                     |
| 17676 | dirMS_041712_NAR_20mM_minus.13129.13129.2  | 6.75 | 0.235E+05       | (RIQNGTPE(R)G)N P/T/V/E D/L F/T S K(G)           | 183.13 | 703.8605 | 1406.716 | -0.0025  | -1.8  | 4.37 | 21077    | 9.05  | HUMAN | K7EM90 | Alpha-enolase (Fragment)                                              |
| 17677 | dirMS_041712_NAR_40mM_plus.8128.8128.2     | 6.75 | 0.138E+05       | (RIQDCLVS(R)G)V L/V/S/D/S D/V L/P R(K)           | 128.2  | 491.9311 | 1473.78  | -0.0008  | -0.5  | 4.56 | 56607.4  | 5.37  | HUMAN | FR9V04 | Keratin, type II cytoskeletal 8                                       |
| 17678 | dirMS_041712_NAR_40mM_plus.10527.10527.3   | 6.75 | 0.784E+04       | (KIQKEDV(K)K)Y V/V/V D/V K/S C V R(V)            | 128.13 | 481.2838 | 1444.837 | 0.0005   | -0.3  | 6.04 | 68668.3  | 5.77  | HUMAN | B4D2C6 | Fragile X mental retardation syndrome-related protein 1               |
| 17679 | dirMS_041712_NAR_50mM_minus.12318.12318.3  | 6.75 | 0.100E+05       | (KIQVJNSN(K)K)V/D/D S/V/S F S E R(N)             | 138.13 | 472.5813 | 1415.728 | -0.0016  | -1.1  | 5.32 | 144109.9 | 6.01  | HUMAN | BK3R87 | Claflarin heavy chain 2                                               |
| 17680 | dirMS_041712_NAR_50mM_plus.17094.17094.3   | 6.75 | 0.155E+05       | (RIILEVLS(R)K)E/L/V/L/S/G E I/P/L P K/T(G)       | 165.35 | 546.3329 | 1636.988 | -0.0042  | -2.6  | 6.14 | 13611    | 6.13  | HUMAN | EP9122 | Spectrin beta chain, non-erythrocytic 2 (Fragment)                    |
| 17681 | dirMS_041712_NAR_30mM_minus.12810.12810.3  | 6.75 | 0.150E+05       | (RIQFDSDP(R)P)S D/V K L/V/L D N/S R(S)           | 131.37 | 524.9451 | 1572.823 | -0.0002  | -1.3  | 4.55 | 20111    | 4.47  | HUMAN | HDYH26 | Acidic leucine-rich nuclear phosphoprotein 32 family member A         |
| 17682 | dirMS_041712_NAR_30mM_plus.1785.1785.3     | 6.75 | 0.588E+05       | (KIQVYVLS(K)K)A(I)A/V D/V L/V L/K(E)             | 159.98 | 511.3553 | 1531.555 | -0.0009  | -0.4  | 5.88 | 10729.7  | 6.09  | HUMAN | Q9YFW1 | Vimentin                                                              |
| 17683 | dirMS_041712_NAR_20mM_plus.8013.8013.2     | 6.75 | 0.421E+05 M238m | (RIQVSDQ(K)E)V D/E M/L/M V/Q(N)K(K)              | 125.1  | 731.8435 | 1446.689 | -15.9004 | -3.1  | 4.14 | 40069.4  | 4.83  | HUMAN | EF7474 | ATP-dependent RNA helicase DDX39A                                     |
| 17684 | dirMS_041712_NAR_30mM_plus.19386.19386.2   | 6.75 | 0.193E+05       | (KIQCALDFR(K)K)A(I)D/V F R(Q)                    | 155.83 | 464.7242 | 928.434  | 0.0066   | 7.1   | 5.84 | 15387.4  | 6.92  | HUMAN | FR7477 | NADH dehydrogenase [ubiquinone] alpha subcomplex subunit 8            |
| 17685 | dirMS_041712_NAR_30mM_plus.5715.5715.2     | 6.75 | 0.689E+04       | (RIQILDGE(R)I)D L/D G Q/P E S K(K)               | 83.85  | 623.2808 | 1245.559 | -0.0005  | -0.4  | 3.91 | 73399.3  | 6.86  | HUMAN | Q92945 | Far upstream element-binding protein 2                                |
| 17686 | dirMS_041712_NAR_40mM_plus.6408.6408.2     | 6.75 | 0.240E+05       | (RIQVYVLS(K)K)A(I)A/V D/V L/V L/K(E)             | 167.49 | 492.1648 | 903.376  | 0.0007   | -8.5  | 4.5  | 10702.3  | 6.09  | HUMAN | Q9YFW1 | Bromodomain-containing protein 5                                      |
| 17687 | dirMS_041712_NAR_30mM_plus.6978.6978.2     | 6.75 | 0.246E+05       | (RIQVFPVQ(R)F)I/D J/D N T/Q LK(V)                | 91.57  | 539.2643 | 1077.521 | 0.0002   | 0.2   | 4.37 | 26516.1  | 5.68  | HUMAN | EP9100 | Euplakin                                                              |
| 17688 | dirMS_041712_NAR_40mM_plus.10239.10239.2   | 6.75 | 0.125E+05       | (KQJAAVLE(K)K)A A/V L E/T/P R(K)                 | 124.93 | 479.2747 | 957.536  | 0.0058   | 6     | 6.05 | 114409.9 | 5.99  | HUMAN | Q3ZCV1 | Ubiquitin carboxyl-terminal hydrolase                                 |
| 17689 | dirMS_041712_NAR_40mM_plus.17597.17597.3   | 6.75 | 0.536E+04       | (KIQVATV(K)K)A(S)I/V/I Q/V F/V N/P L E E R(K)    | 170.05 | 576.6528 | 1724.933 | 0.0109   | 6.3   | 5.4  | 24511.6  | 6.62  | HUMAN | C9J5E5 | Vitellin (Fragment)                                                   |
| 17690 | dirMS_041712_NAR_40mM_plus.11963.11963.3   | 6.75 | 0.138E+05       | (RIQVMDL(R)K)I/V D/L V/M A/H M A S K(I)          | 130.52 | 444.2215 | 1330.649 | 0.0006   | 0.4   | 5.51 | 31718.5  | 7.17  | HUMAN | EF7474 | Glyceraldehyde 3-phosphate dehydrogenase                              |
| 17691 | dirMS_041712_NAR_50mM_plus.7754.7754.3     | 6.75 | 0.136E+05       | (RIQTPLEL(R)K)A(V)A/V D/V L/V L/K(E)             | 106.72 | 434.5738 | 1301.706 | 0.0009   | 0.7   | 6.14 | 54437.4  | 6.04  | HUMAN | K4D0D0 | Acetyl-CoA carboxylase 1                                              |
| 17692 | dirMS_041712_NAR_50mM_plus.9186.9186.3     | 6.75 | 0.163E+04       | (RIQNTSVS(R)R)T/N S/V/P E T A P A A R P E T K(R) | 103.83 | 632.6588 | 1895.982 | -0.0203  | -10.7 | 6.14 | 142137.5 | 9.17  | HUMAN | EF7EJ4 | Double-stranded RNA-specific adenosine deaminase                      |
| 17693 | dirMS_041712_NAR_60mM_plus.8883.8883.3     | 6.75 | 0.711E+05       | (RIQQLQAL(R)K)Q/L Q/L A/Q/A A Q L R(K)           | 114.67 | 461.9268 | 1383.77  | -0.0044  | -3.2  | 8.75 | 53377.8  | 5.74  | HUMAN | Q15149 | Plectin                                                               |
| 17694 | dirMS_041712_NAR_120mM_minus.15551.15551.3 | 6.74 | 0.300E+05       | (RIQMSMKE(R)M)M E V E D/E Q/V/L M V/Q(N)K(K)     | 138.97 | 641.9706 | 1923.897 | 0        | 0     | 4.68 | 40069.4  | 4.83  | HUMAN | EF7EJ4 | Ubiquitin beta chain                                                  |
| 17695 | dirMS_041712_NAR_30mM_plus.16247.16247.2   | 6.74 | 0.232E+05 M268m | (RIQVYVLS(K)K)A(I)A/V D/V L/V L/K(E)             | 167.49 | 492.1648 | 903.376  | 0.0007   | -8.5  | 4.5  | 10702.3  | 6.09  | HUMAN | Q9YFW1 | Bromodomain-containing protein 5                                      |
| 17696 | dirMS_041712_NAR_30mM_plus.18782.18782.2   | 6.74 | 0.344E+04       | (KIQYPLAQ(K)Q)Y/L/L P G R(K)                     | 157.48 | 528.816  | 1056.62  | 0.0047   | 4.4   | 8.75 | 45218.3  | 6.03  | HUMAN | EP9137 | Adenosine guanylyltransferase                                         |
| 17697 | dirMS_041712_NAR_40mM_minus.9192.9192.3    | 6.74 | 0.157E+05 M268m | (RIQSLAM(R)R)I S/V M L V/P V/T P E/V P K(R)      | 136.37 | 542.315  | 1608.939 | 15.9111  | -2.3  | 5.99 | 31524.1  | 4.5   | HUMAN | PR270  | High mobility group nucleosome-binding domain-containing protein 5    |
| 17698 | dirMS_041712_NAR_50mM_plus.14757.14757.3   | 6.74 | 0.803E+04 M176m | (RIQARPTP(R)K)A R P P T Y/V/T A/M Q S L L K(I)   | 131.87 | 603.3247 | 1791.979 | 1.5891   | -7.7  | 9.99 | 150022.8 | 9.1   | HUMAN | EF7EJ4 | Ubiquitin-like modifier-activating enzyme 1                           |
| 17699 | dirMS_041712_NAR_60mM_minus.4735.4735.2    | 6.74 | 0.135E+06       | (RIQAAEES(K)K)E A(S)I/V D/V L/V L/K(E)           | 78.07  | 453.8272 | 1359.602 | -0.0008  | -0.6  | 4.08 | 15239.7  | 4.14  | HUMAN | Q9D962 | Phenylmethionine                                                      |
| 17700 | dirMS_041712_NAR_120mM_plus.17668.17668.4  | 6.74 | 0.140E+05       | (KIQKTTTNE(K)K)T T I/V N N Q/L P H L A S R(F)    | 145.95 | 466.7655 | 1864.065 | -0.0249  | -11.4 | 8.76 | 95792.4  | 6.36  | HUMAN | BK3PVA | DNA replication licensing factor MCM4                                 |
| 17701 | dirMS_041712_NAR_120mM_plus.8668.8668.3    | 6.74 | 0.157E+05       | (RIQRTTEP(R)R)T E E G/P/T L/S Y G R(F)           | 99.07  | 455.8929 | 1365.676 | -0.0116  | -8.5  | 6.14 | 100478.9 | 5.71  | HUMAN | ABMX9P | Matrin-3                                                              |
| 17702 | dirMS_041712_NAR_20mM_plus.18827.18827.2   | 6.74 | 0.103E+05       | (KIQLVYTL(K)K)T I/V Y/T I/L D V T G(K)           | 200.85 | 681.8948 | 1366.783 | -0.0005  | -0.4  | 5.83 | 42194.9  | 8.75  | HUMAN | EF7EM4 | Acid ceramidase                                                       |
| 17703 | dirMS_041712_NAR_20mM_plus.19364.19364.3   | 6.74 | 0.222E+05       | (RIQALQTP(R)K)A G S T G P T/W I/L V I/A Q R(S)   | 204.52 | 541.9731 | 1623.906 | -0.0017  | -1    | 4.53 | 118930.9 | 5.49  | HUMAN | P22314 | Ubiquitin-like modifier-activating enzyme 1                           |
| 17704 | dirMS_041712_NAR_20mM_plus.8182.8182.2     | 6.74 | 0.329E+05 M176m | (RIQVYVLS(K)K)A(I)A/V D/V L/V L/K(E)             | 126.93 | 492.1648 | 1201.551 | -0.0027  | -1.4  | 4.53 | 23920.1  | 6.09  | HUMAN | Q9YFW1 | Ubiquitin-like modifier-activating enzyme 1                           |
| 17705 | dirMS_041712_NAR_30mM_plus.14230.14230.3   | 6.74 | 0.323E+05       | (RIQNDSDI(R)N)D S I L/Q/A/Q/E G R(R)             | 127.15 | 463.2439 | 1387.718 | -0.0004  | -0.3  | 4.37 | 34221.3  | 6.44  | HUMAN | PI5294 | Desmoplakin                                                           |
| 17706 | dirMS_041712_NAR_30mM_plus.16028.16028.2   | 6.74 | 0.159E+06       | (KIQCSWNV(K)C)I/S/W N/V D/L R(A)                 | 137.75 | 610.3003 | 1219.589 | 0.0045   | 3.7   | 5.84 | 19395.5  | 6.38  | HUMAN | GV3359 | DNA-(apurinic or apyrimidinic site) lyase (Fragment)                  |
| 17707 | dirMS_041712_NAR_30mM_plus.20862.21124.2   | 6.74 | 0.343E+05       | (KIQFIPQV(K)K)I I/P D I/V K V(K)                 | 164.53 | 479.3092 | 957.613  | -0.0002  | -2.1  | 8.75 | 25445.8  | 5.52  | HUMAN | ABM9V0 | Lactate dehydrogenase (Fragment)                                      |
| 17708 | dirMS_041712_NAR_30mM_plus.21039.21039.2   | 6.74 | 0.106E+05       | (RIQVYVLS(K)K)A(I)A/V D/V L/V L/K(E)             | 167.49 | 492.1648 | 903.376  | 0.0009   | 2.9   | 4.54 | 11981.6  | 6.04  | HUMAN | Q9E242 | Far upstream element-binding protein 3                                |
| 17709 | dirMS_041712_NAR_40mM_plus.10829.10829.3   | 6.74 | 0.222E+05       | (RIQEAQAL(R)K)E A(S)I/V D/V L/V L/K(E)           | 128.95 | 665.6807 | 1995.033 | -0.0052  | -2.6  | 6.75 | 33421.3  | 6.44  | HUMAN | PI5294 | Lactate dehydrogenase (Fragment)                                      |
| 17710 | dirMS_041712_NAR_40mM_plus.9826.9826.3     | 6.74 | 0.123E+05       | (RIQVYVLS(K)K)A(I)A/V D/V L/V L/K(E)             | 122.05 | 595.9778 | 1785.916 | 0.0025   | 1.4   | 6.04 | 15431.7  | 9     | HUMAN | EF7EJ0 | Nucleoside diphosphate kinase A                                       |
| 17711 | dirMS_041712_NAR_50mM_plus.12806.12806.3   | 6.74 | 0.476E+05       | (KIQVQTVK(K)Q)I/V Q/D I/V D F G R A P S A(K)     | 134.77 | 558.642  |          |          |       |      |          |       |       |        |                                                                       |







|       |                                            |   |      |                 |                                                    |                           |        |          |          |          |       |      |          |       |       |        |                                                                      |
|-------|--------------------------------------------|---|------|-----------------|----------------------------------------------------|---------------------------|--------|----------|----------|----------|-------|------|----------|-------|-------|--------|----------------------------------------------------------------------|
| 17981 | dirMS_041712_NAR_20mM_minus.14243.14243.2  | 2 | 6.61 | 0.259E+05       | (KVTDDV)(K)V/DL/LV/C(VVY KIT)                      | C.carbonamidoethylation   | 195.25 | 662.8445 | 1324.682 | 0        | 0     | 4.21 | 10225.7  | 7.97  | HUMAN | PA458  | Signal recognition particle 9 kDa subunit                            |
| 17982 | dirMS_041712_NAR_20mM_minus.8212.8212.1    | 2 | 6.61 | 0.574E+03       | (KDDQWAK)(K)Q/VLVA/SF A V/E/LR(L)                  |                           | 131.7  | 618.309  | 1235.602 | 0.0108   | 8.8   | 4.37 | 85057.6  | 4.94  | HUMAN | PO7900 | Heat shock protein HSP 90 alpha                                      |
| 17983 | dirMS_041712_NAR_20mM_minus.14131.14131.2  | 2 | 6.61 | 0.132E+05       | (KIDAGNE)(K)G/A/G/E/LV/LR(L)                       | C.carbonamidoethylation   | 181.2  | 561.261  | 1261.531 | 0.0022   | 1.8   | 4.37 | 29132.6  | 6.12  | HUMAN | CE104  | Glyceraldehyde 3-phosphate dehydrogenase                             |
| 17984 | dirMS_041712_NAR_20mM_minus.7998.7998.2    | 2 | 6.61 | 0.183E+05       | (KQ32E)(K)S/G/N/E/V/E/LR(K)                        |                           | 98.32  | 495.7528 | 990.511  | -0.0119  | -12   | 4.53 | 30947.9  | 4.67  | HUMAN | HK0304 | Pyruvate kinase                                                      |
| 17985 | dirMS_041712_NAR_20mM_minus.13981.13981.3  | 3 | 6.61 | 1.362E+05       | (KVIDPDK)(K)V/D/P A T A T S V/D L R (R)(K)         |                           | 148.08 | 571.9822 | 1713.938 | -0.0061  | -3.6  | 4.43 | 42755    | 7.81  | HUMAN | BZ724  | T-complex protein 1 subunit delta                                    |
| 17986 | dirMS_041712_NAR_50mM_minus.8479.8479.3    | 3 | 6.61 | 0.430E+04       | (RDIHQIQR)(R)N I Q G I G P/K/P A R(N)              |                           | 116.12 | 442.5888 | 1325.754 | -0.0017  | -1.3  | 8.75 | 11367.1  | 11.36 | HUMAN | PE2005 | Histone H4                                                           |
| 17987 | dirMS_041712_NAR_120mM_plus.14724.14724.3  | 3 | 6.61 | 0.192E+06       | (KIVNWHI)(K)N/V/N/F I F E V/E(LR)                  |                           | 135.35 | 442.5460 | 1232.624 | -0.0249  | -7.4  | 6.1  | 45300.6  | 5.35  | HUMAN | AKB732 | Heat shock cognate 71 kDa protein                                    |
| 17988 | dirMS_041712_NAR_20mM_plus.17026.17026.2   | 2 | 6.61 | 0.190E+05       | (KILFVLQ)(K)F L V/LQ/L Q E (K)                     |                           | 189.4  | 555.3342 | 1117.662 | 0.0004   | 0.4   | 6    | 17283.8  | 5.95  | HUMAN | HB3ND3 | Cleavage and polyadenylation-specificity factor subunit 5 (Fragment) |
| 17989 | dirMS_041712_NAR_20mM_plus.17039.17039.2   | 2 | 6.61 | 0.806E+04       | (KIVNPIH)(K)V/N/I/V/I/A (K)(K)                     |                           | 189.2  | 490.8283 | 980.65   | -0.001   | -1    | 8.72 | 51122    | 5.84  | HUMAN | ANFQ9  | Septin-8                                                             |
| 17990 | dirMS_041712_NAR_20mM_plus.17974.17974.2   | 2 | 6.61 | 0.132E+05       | (KVIDPDK)(K)V/D/P F/P D Q/L S T A L T/G R(N)       |                           | 195.42 | 780.9029 | 1560.802 | -0.0018  | -2    | 4.21 | 31330.8  | 9.26  | HUMAN | EP2082 | Malate dehydrogenase, mitochondrial                                  |
| 17991 | dirMS_041712_NAR_20mM_plus.9115.9115.2     | 2 | 6.61 | 0.430E+05       | (KIVPELNC)(K)V/P/L/E/LR(L)(K)                      |                           | 133.42 | 435.2573 | 869.509  | -0.0018  | -2    | 5.97 | 37178.5  | 7.17  | HUMAN | ETL714 | Glyceraldehyde-3-phosphate dehydrogenase                             |
| 17992 | dirMS_041712_NAR_20mM_plus.13771.13771.2   | 2 | 6.61 | 0.485E+05       | (RIVAMEGA)(K)N/G/E/V/LV/LA/RA(R)                   |                           | 114.2  | 558.7944 | 1114.522 | -0.0015  | -1.3  | 6.05 | 80685.1  | 7.12  | HUMAN | KT065  | Propionyl-CoA carboxylase alpha chain, mitochondrial                 |
| 17993 | dirMS_041712_NAR_30mM_plus.15462.15462.2   | 2 | 6.61 | 0.711E+05       | (RIVYPNS)(R)V/P/V/N(S)I/N L(K)(A)                  |                           | 133.82 | 573.8278 | 1146.652 | -0.0034  | -3    | 8.59 | 44227.3  | 7.81  | HUMAN | ETC026 | T-complex protein 1 subunit alpha                                    |
| 17994 | dirMS_041712_NAR_40mM_plus.17841.17841.3   | 3 | 6.61 | 0.231E+06       | (RILFVGNLR)(R)F/V/GN/L/P A D I T E D F F R(L)      |                           | 170.37 | 655.3421 | 1964.012 | -0.0006  | -0.3  | 4.32 | 76262.2  | 9.53  | HUMAN | P23246 | Splicing factor, proline- and glutamine-rich                         |
| 17995 | dirMS_041712_NAR_50mM_plus.13792.13792.3   | 3 | 6.61 | 0.477E+05       | (RISLMDK)(R)S I/L K I/DVW/N T/R(R)                 |                           | 144.58 | 456.2605 | 1372.78  | -0.0125  | -9.1  | 5.68 | 42795    | 7.81  | HUMAN | BZ7274 | T-complex protein 1 subunit delta                                    |
| 17996 | dirMS_041712_NAR_50mM_plus.16862.16862.3   | 3 | 6.61 | 0.155E+06       | (KISSDHA)(K)S D H S F S L/E I/P E/L/E/LR/V R(S)    | C.carbonamidoethylation   | 159.3  | 622.9862 | 1869.919 | 0.0001   | 10.7  | 4.4  | 12263.3  | 5.59  | HUMAN | OST80  | N-acetylneuraminic acid synthase (Fragment)                          |
| 17997 | dirMS_041712_NAR_30mM_plus.11905.11905.2   | 2 | 6.6  | 0.548E+04       | (KIMLVGE)(K)M/V/LV/E/Q(K)                          |                           | 140.78 | 510.7635 | 1020.522 | -0.019   | -1.9  | 5.75 | 42952    | 5.86  | HUMAN | BD478  | T-complex protein 1 subunit epsilon                                  |
| 17998 | dirMS_041712_NAR_30mM_minus.11385.11385.2  | 2 | 6.6  | 0.979E+04       | (RINTDEM)(R)N T D/E V V E/R(I)                     |                           | 110.77 | 553.7611 | 1106.515 | 0.0003   | 0.2   | 4.14 | 51260.6  | 5.39  | HUMAN | PE1978 | Heterogeneous nuclear ribonucleoprotein K                            |
| 17999 | dirMS_041712_NAR_30mM_minus.16919.16919.2  | 2 | 6.6  | 0.127E+05       | (KINLVISYH)(K)G E/G Q/L/G S V R(G)                 |                           | 145.65 | 475.2872 | 949.572  | -0.0042  | -4.8  | 8.59 | 12270.4  | 11.49 | HUMAN | B9ZV97 | 60S ribosomal protein L23                                            |
| 18000 | dirMS_041712_NAR_50mM_minus.10524.10524.2  | 2 | 6.6  | 1.032E+05 M72m  | (RITFHEH)(R)T E/H E/E F V/LV R(KID)                |                           | 128.6  | 748.8859 | 1480.772 | 15.9929  | -1.3  | 4.78 | 13558.1  | 4.66  | HUMAN | FRV957 | Keratin, type I cytoskeletal 8 (Fragment)                            |
| 18001 | dirMS_041712_NAR_50mM_minus.10605.10605.3  | 3 | 6.6  | 0.190E+05       | (KISQHDH)(K)S E Q/H Q/V/LVQ/L Q E T(R)             |                           | 128.67 | 484.6068 | 1481.807 | -0.0012  | 0.8   | 6.46 | 45008.6  | 5.5   | HUMAN | AKB702 | Heat shock cognate-71 kDa protein                                    |
| 18002 | dirMS_041712_NAR_50mM_minus.9308.9308.3    | 3 | 6.6  | 1.136E+05       | (R)QEELQ)(R)Q E E Q/L/A/Q A/K/D E/L/LV(LV)         |                           | 121.4  | 567.9554 | 1701.854 | -0.0025  | -1.5  | 4.14 | 23493.8  | 5.45  | HUMAN | F8V13  | Myosin-10                                                            |
| 18003 | dirMS_041712_NAR_120mM_plus.22951.22951.4  | 4 | 6.6  | 1.396E+05       | (KIGLAPAL)(K)G LVA/P Q/L/V/L H I L(K)(A)           |                           | 174.1  | 459.259  | 1822.011 | 0.0033   | 1.8   | 5.38 | 16789.5  | 10.63 | HUMAN | JKM45  | 40S ribosomal protein S13                                            |
| 18004 | dirMS_041712_NAR_20mM_plus.7830.7830.3     | 3 | 6.6  | 0.226E+05 M316m | (R)RAMEG)(R)R A M G E/V/LP/A/LA R(K)               | m.Deadend methionine      | 94.5   | 430.2310 | 1272.684 | 15.9961  | 0.9   | 9.6  | 80685.1  | 7.31  | HUMAN | PO5365 | Propionyl-CoA carboxylase alpha chain, mitochondrial                 |
| 18005 | dirMS_041712_NAR_20mM_plus.15165.15165.3   | 3 | 6.6  | 0.935E+04       | (KIDVSA)(K)K V/D L V A/S S R/Q(R)                  |                           | 176.23 | 437.2168 | 1309.638 | -0.0024  | -1.9  | 4.21 | 33029.4  | 6.92  | HUMAN | DB6810 | Guanine nucleotide-binding protein subunit beta-2-like 1 (Fragment)  |
| 18006 | dirMS_041712_NAR_20mM_plus.16722.16722.2   | 2 | 6.6  | 0.190E+05       | (R)RARDL)(R)R A Q/L/E/L R(LR)                      |                           | 186.3  | 556.347  | 1111.695 | -0.0145  | -13   | 9.6  | 91291.1  | 9.13  | HUMAN | OT5173 | A disintegrin and metalloproteinase with thrombospondin motifs 4     |
| 18007 | dirMS_041712_NAR_30mM_plus.19468.19468.2   | 2 | 6.6  | 0.219E+05       | (KIVSFG)(K)M F/G/A/E/L E G L V/R(K)                |                           | 155.58 | 646.331  | 1291.664 | 0.0008   | 0.6   | 4.53 | 71924.9  | 6.25  | HUMAN | BADF2A | Vesicle-fusing ATPase                                                |
| 18008 | dirMS_041712_NAR_30mM_plus.8473.8473.2     | 2 | 6.6  | 0.792E+05       | (K)ITACD)(K)T A I C/D/P/P R(K)                     | C.carbonamidoethylation   | 99.28  | 514.7643 | 1028.519 | 0.002    | 1.9   | 5.5  | 50199.4  | 9.47  | HUMAN | ABN222 | Tubulin beta-8 chain-like protein LOC206334                          |
| 18009 | dirMS_041712_NAR_30mM_plus.8831.8831.2     | 2 | 6.6  | 0.239E+05       | (KIVSFG)(K)M F/G/A/E/L E G L V/R(K)                |                           | 99.58  | 491.744  | 981.88   | 0.0014   | 5.2   | 5.72 | 91272.5  | 6.25  | HUMAN | PI2720 | Endoplasmic reticulum protein 226 kDa                                |
| 18010 | dirMS_041712_NAR_40mM_plus.17627.17627.3   | 3 | 6.6  | 0.196E+05       | (K)IVSDF)(R)K L P S I/P V/LP V S A G Q(R)          |                           | 107.57 | 530.671  | 1589.999 | -0.0004  | -3    | 10   | 34958.1  | 9.42  | HUMAN | OT5185 | Mitochondrial iron receptor subunit TOM34                            |
| 18011 | dirMS_041712_NAR_40mM_plus.25309.25309.2   | 2 | 6.6  | 0.131E+05       | (R)HYSOY)(R)D Y/S G Y Q(K)                         |                           | 87.43  | 444.6967 | 888.385  | 0.0015   | 1.7   | 5.83 | 70523.3  | 6.94  | HUMAN | GV153  | Caprin-1                                                             |
| 18012 | dirMS_041712_NAR_40mM_plus.5905.5905.2     | 2 | 6.6  | 0.243E+04       | (K)IGEGQL)(K)G E/G Q/L/G P A R(A)                  |                           | 97.27  | 507.2532 | 1013.501 | -0.0019  | -1.9  | 4.53 | 96306.4  | 4.44  | HUMAN | PI3639 | Elongation factor 2                                                  |
| 18013 | dirMS_041712_NAR_40mM_plus.29306.29306.3   | 3 | 6.6  | 1.140E+05       | (K)VEVLE)(K)G E/G Q/L/G S V R(G)                   |                           | 122.43 | 440.661  | 1319.650 | -0.0015  | -0.3  | 4.32 | 28309.6  | 6.91  | HUMAN | EP9186 | Protein acetyltransferase sperin protein (Fragment)                  |
| 18014 | dirMS_041712_NAR_50mM_plus.10468.10468.2   | 2 | 6.6  | 0.153E+06       | (R)IDKVLK)(R)D G/K/LV/S E E S D V/LP Q(K)          |                           | 122.85 | 377.3925 | 1473.78  | -0.0018  | -12   | 4.56 | 56607.4  | 5.37  | HUMAN | FRV834 | Keratin, type II cytoskeletal 8                                      |
| 18015 | dirMS_041712_NAR_50mM_plus.13963.13963.3   | 3 | 6.6  | 0.641E+05       | (K)IGELVL)(K)G G/E/LV/V T/D S E A R/V F E(K)       |                           | 141.47 | 638.9735 | 1914.908 | -0.002   | -1.1  | 4.18 | 53778    | 5.74  | HUMAN | Q15149 | Plectin                                                              |
| 18016 | dirMS_041712_NAR_50mM_plus.14273.14273.3   | 3 | 6.6  | 0.231E+06       | (K)IVFPA)(K)V E/P V A L A P S/P V I P R(L)         |                           | 143.27 | 482.2828 | 1444.852 | -0.0184  | -12.7 | 5.97 | 104321.6 | 9.31  | HUMAN | OSVW5  | Transcription initiation factor TFIID subunit 3                      |
| 18017 | dirMS_041712_NAR_50mM_plus.15445.15445.3   | 3 | 6.6  | 0.972E+05       | (R)IVPQV)(R)R V V V G V T A I L U/D E/D/T/G F R(I) |                           | 149.82 | 650.0588 | 1948.002 | -0.0024  | -1.2  | 4.32 | 88668.3  | 9.77  | HUMAN | BD4Q26 | Fragile X mental retardation syndrome-related protein 1              |
| 18018 | dirMS_041712_NAR_50mM_plus.18484.18484.3   | 3 | 6.6  | 0.354E+05       | (K)IVSDF)(R)K L P S I/P V/LP V S A G Q(R)          | C.carbonamidoethylation   | 166.02 | 598.6527 | 1793.947 | -0.0019  | -1.7  | 6.04 | 113880.5 | 9.18  | HUMAN | RO874  | Poly (ADP-ribose) polymerase 1                                       |
| 18019 | dirMS_041712_NAR_60mM_plus.16387.16387.3   | 3 | 6.6  | 0.184E+05       | (K)IKAFDP)(K)K A P D F/V/N/P A P R(L)              |                           | 141.8  | 437.665  | 1310.689 | 0.0018   | 1.3   | 8.59 | 71218.8  | 6.3   | HUMAN | A7U18  | Radixin                                                              |
| 18020 | dirMS_041712_NAR_60mM_plus.19044.19044.3   | 3 | 6.6  | 0.144E+04       | (R)IHGSHI)(R)F G H S T S A L/S A/L A/R(S)          |                           | 157.23 | 520.622  | 1559.854 | -0.0026  | -1.6  | 9.75 | 376926.5 | 4.99  | HUMAN | HY55W  | E3 ubiquitin-protein ligase HUWE1 (Fragment)                         |
| 18021 | dirMS_041712_NAR_60mM_plus.7608.7608.3     | 3 | 6.6  | 0.432E+05 S5    | (-I)TSPAP(-)F T S A S P/A/S L A S A R(W)           | v.N-terminus(guanosine S) | 97.93  | 531.6013 | 1389.697 | 203.0292 | 6.2   | 9.72 | 4018.6   | 11.11 | HUMAN | ET6U5  | 116 kDa US small nuclear ribonucleoprotein component (Fragment)      |
| 18022 | dirMS_041712_NAR_120mM_plus.8341.8341.3    | 3 | 6.6  | 0.919E+05       | (K)IVSDF)(R)K L P S I/P V/LP V S A G Q(R)          |                           | 107.25 | 493.6013 | 1389.697 | 203.0292 | 6.2   | 9.72 | 4018.6   | 11.11 | HUMAN | ET6U5  | 116 kDa US small nuclear ribonucleoprotein component (Fragment)      |
| 18023 | dirMS_041712_NAR_120mM_plus.13862.13862.3  | 3 | 6.59 | 0.919E+04       | (K)ISDSSG)(K)P S D G/L/V/LV/LV R(K)                |                           | 125.58 | 477.5658 | 1430.701 | -0.0181  | -12.6 | 3.91 | 114417.4 | 5.61  | HUMAN | GV53V  | Nuclear export mediator factor NEMF (Fragment)                       |
| 18024 | dirMS_041712_NAR_120mM_minus.17487.17487.3 | 3 | 6.59 | 0.289E+05       | (R)RAPDF)(R)R V P F/V/L/E N(K)(K)                  |                           | 79.95  | 408.8893 | 1206.594 | 15.9993  | 3.7   | 5.81 | 37296.3  | 5.3   | HUMAN | FRVJ64 | Keratin, type I cytoskeletal 8                                       |
| 18025 | dirMS_041712_NAR_120mM_minus.4584.4584.3   | 3 | 6.59 | 1.446E+05 M310m | (R)ITKTEI)(R)T K T E V S I m R(N)                  | m.Deadend methionine      | 73.68  | 480.8969 | 1208.594 | 15.9994  | 3.7   | 5.81 | 37296.3  | 5.3   | HUMAN | FRVJ64 | Keratin, type I cytoskeletal 8                                       |
| 18026 | dirMS_041712_NAR_20mM_minus.10391.10391.2  | 2 | 6.59 | 0.144E+05       | (R)IVPQV)(R)R V V V G V T A I L U/D E/D/T/G F R(I) |                           | 149.82 | 650.0588 | 1948.002 | -0.0024  | -1.2  | 4.32 | 88668.3  | 9.77  | HUMAN | BD4Q26 | Fragile X mental retardation syndrome-related protein 1              |
| 18027 | dirMS_041712_NAR_30mM_plus.18833.18833.2   | 2 | 6.59 | 0.541E+04       | (K)IGVTEG)(R)G E G Q/LVQ/LV/LV R(S)(Q)             | C.carbonamidoethylation   | 157.12 | 804.8951 | 1608.78  | 0.0011   | 1.9   | 6    | 150022.8 | 8.1   | HUMAN | ETW20  | Unconventional myosin-V                                              |
| 18028 | dirMS_041712_NAR_30mM_plus.6064.6064.2     | 2 | 6.59 | 0.264E+05       | (K)JTEVNC)(K)S I/E/LV/N(K)                         | C.carbonamidoethylation   | 87.3   | 514.726  | 1028.447 | -0.0018  | -1.8  | 5.66 | 18946.7  | 9.13  | HUMAN | BD4P17 | Cellular nucleic acid-binding protein                                |
| 18029 | dirMS_041712_NAR_30mM_minus.7603.7603.2    | 2 | 6.59 | 0.658E+05       | (R)EQALV)(R)R Q/L/A/V/S R(N)                       |                           | 96.32  | 437.2408 | 871.479  | -0.0045  | -5.2  | 6.1  | 6939     | 10.41 | HUMAN | ESR616 | V-type proton ATPase subunit B, brain isoform                        |
| 18030 | dirMS_041712_NAR_40mM_plus.15678.15678.3   | 3 | 6.59 | 0.190E+05       | (K)IGALEV)(K)G A/E L V/E V/H S/L P A V/R(N)        |                           | 182.33 | 535.3104 | 1603.917 | 0        | 0     | 5.4  | 52787.2  | 6.32  | HUMAN | CN224  | 26S proteasome non-ATPase regulatory subunit 6                       |
| 18031 | dirMS_041712_NAR_50mM_plus.14321.14321.3   | 3 | 6.59 | 0.832E+04       | (R)IVSDF)(R)K L P S I/P V/LP V S A G Q(R)          |                           |        |          |          |          |       |      |          |       |       |        |                                                                      |



|       |                                            |   |      |                 |                                                |        |          |          |          |      |      |          |             |        |                                                                                   |
|-------|--------------------------------------------|---|------|-----------------|------------------------------------------------|--------|----------|----------|----------|------|------|----------|-------------|--------|-----------------------------------------------------------------------------------|
| 18199 | dirMS_041712_NAR_30mM_plus2.17270.17270.2  | 2 | 6.52 | 0.698E+04       | (KIWFLYMK)(K)W/V/LY/M5/T(K)                    | 144.88 | 513.2647 | 1025.513 | 0.0097   | 9.4  | 8.59 | 45578.2  | 7.83 HUMAN  | B4DLF2 | Isocitrate dehydrogenase [NADP]                                                   |
| 18200 | dirMS_041712_NAR_30mM_plus2.17799.17799.2  | 2 | 6.52 | 0.265E+05       | (KINMGDQ)(K)Y/N/L/G/D/L/R(T)                   | 146.2  | 482.2695 | 961.526  | -0.0059  | 6.1  | 5.83 | 43177.5  | 6.74 HUMAN  | B3KV05 | Glutamate dehydrogenase                                                           |
| 18201 | dirMS_041712_NAR_40mM_plus2.17857.17857.3  | 2 | 6.52 | 1.737E+04 M165m | (KIFELIASK)(K)I/L/V/L/P/F/L/S/F/L(A)K(A)       | 171    | 634.8899 | 1248.999 | -0.0005  | -3.4 | 10   | 102376.3 | 4.77 HUMAN  | Q9Q474 | Protein domain 5                                                                  |
| 18202 | dirMS_041712_NAR_40mM_plus2.5283.5283.2    | 2 | 6.52 | 0.493E+04       | (KRISSGS)(R)G/S/S(A)S/S/F/S/S/S(R)K            | 87.7   | 681.2899 | 1361.593 | -0.0059  | -0.3 | 9.75 | 73641.5  | 7.2 HUMAN   | Q00071 | ATP-dependent RNA helicase DDX3X                                                  |
| 18203 | dirMS_041712_NAR_50mM_plus2.13681.13681.3  | 3 | 6.52 | 0.446E+05       | (KJFLSDPP)(K)F/L/S/D/Q/V/H/T/V/L/V/R(S)        | 140.13 | 547.2984 | 1639.88  | 0.0004   | 0.3  | 5.32 | 53513.6  | 6.01 HUMAN  | Q14204 | Cytoplasmic dynein 1 heavy chain 1                                                |
| 18204 | dirMS_041712_NAR_50mM_plus2.16363.16363.3  | 3 | 6.52 | 0.537E+05       | (KRIQVGGI)(R)V/V/Q/G(V)L/S/E/T/V/L/V/A/H(R)    | 154.53 | 614.9984 | 1842.971 | -0.0008  | 5.3  | 5.4  | 81934.1  | 6.10 HUMAN  | P33993 | DNA replication licensing factor CMCM7                                            |
| 18205 | dirMS_041712_NAR_50mM_plus2.16366.16366.3  | 3 | 6.52 | 1.135E+05       | (KIKELNWK)(K)E/L/V/V/P/F/L/S/S/L(A)K(A)        | 141.6  | 547.2668 | 1640.57  | -0.0005  | -3.4 | 10   | 102376.3 | 4.77 HUMAN  | Q9Q474 | Protein domain 5                                                                  |
| 18206 | dirMS_041712_NAR_50mM_plus2.5854.5854.3    | 3 | 6.52 | 1.684E+04       | (KITAEGAE)(K)I/E/A/E/G/G/L/V/T/G/D/G/G(I)K     | 94.48  | 544.9471 | 1632.819 | 0.008    | 4.9  | 5.73 | 113880.5 | 9.18 HUMAN  | PO8874 | Poly [ADP-ribose] polymerase 1                                                    |
| 18207 | dirMS_041712_NAR_60mM_plus2.17598.17598.3  | 3 | 6.52 | 1.176E+05       | (KRIYTVGS)(R)R/T/Q/S(L)I/D/S/M(R)K             | 148.8  | 554.954  | 1662.848 | -0.0005  | -0.3 | 4.56 | 43773.3  | 5.26 HUMAN  | B8VZ19 | Keratin, type I cytoskeletal 18                                                   |
| 18208 | dirMS_041712_NAR_120mM_minus.14866.14866.4 | 4 | 6.51 | 2.174E+05       | (KJLJAGDO)(K)I/L/A/G/D/K/V/Y/T/M/D/L/R(E)      | 135    | 477.7556 | 1908.001 | -0.0002  | -0.1 | 6.12 | 28932    | 4.94 HUMAN  | HOYV03 | Alpha-actinin-1 (Fragment)                                                        |
| 18209 | dirMS_041712_NAR_120mM_minus.4445.4445.2   | 2 | 6.51 | 0.648E+05       | (KIHSGDGN)(R)H/S/D/G/L/V/L/V/K(V)              | 73.82  | 515.2423 | 1029.478 | -0.0009  | -0.9 | 6.74 | 7781.8   | 6.82 HUMAN  | EP9C20 | Signal recognition particle 9 kDa protein                                         |
| 18210 | dirMS_041712_NAR_120mM_minus.9116.9116.2   | 2 | 6.51 | 0.531E+05       | (KJHFWLVR)(K)I/L/V/V/L/V/L/V/L/V(L)            | 105.45 | 609.8274 | 1214.645 | -0.0016  | -1.1 | 8.76 | 10174.2  | 8.4 HUMAN   | Q9D744 | Glucose-6-phosphate isomerase                                                     |
| 18211 | dirMS_041712_NAR_50mM_minus2.10475.10475.3 | 3 | 6.51 | 1.184E+04       | (KRIEMDE)(R)T/E/M/D/L/M/S/D/K/D/V/G(K)         | 127.38 | 562.2507 | 1684.74  | -0.0029  | -1.7 | 4.1  | 227783.5 | 5.5 HUMAN   | P35579 | Myosin-9                                                                          |
| 18212 | dirMS_041712_NAR_50mM_minus2.16198.16198.3 | 3 | 6.51 | 1.443E+06       | (RIVSFEIAR)(R)S/F/E/L/D/K/V/P(K)               | 159.72 | 460.5908 | 1379.575 | 0.0009   | 0.7  | 6.04 | 13378.5  | 6.27 HUMAN  | C15U57 | Peptidyl-prolyl cis-trans isomerase                                               |
| 18213 | dirMS_041712_NAR_50mM_minus2.8631863.3     | 3 | 6.51 | 0.138E+05       | (RILGVYAR)(R)I/V/G/V/A/V/Y/T/P/T/H/H/G/A/K(N)  | 117.07 | 564.6215 | 1691.839 | 0.0112   | 6.6  | 6.75 | 25016.4  | 5.65 HUMAN  | B3KX28 | Toll-interacting protein                                                          |
| 18214 | dirMS_041712_NAR_60mM_minus.10884.10884.3  | 3 | 6.51 | 1.902E+04       | (KRISSGS)(R)G/S/S(G)A/S/E/V/S/V/V/A/C/L/T/R(E) | 126.65 | 617.9662 | 1851.887 | -0.0055  | -3   | 6.14 | 88264.6  | 5.09 HUMAN  | C18U11 | Cytosolin-4 (Fragment)                                                            |
| 18215 | dirMS_041712_NAR_60mM_plus2.19259.19259.3  | 3 | 6.51 | 1.134E+05       | (KRISSGS)(R)S/F/E/L/D/K/V/P(K)                 | 156    | 460.5911 | 1379.575 | 0.0018   | 1.3  | 6.04 | 13378.5  | 6.27 HUMAN  | C15U57 | Peptidyl-prolyl cis-trans isomerase                                               |
| 18216 | dirMS_041712_NAR_120mM_plus.18006.18006.3  | 3 | 6.51 | 1.363E+05       | (KJRYGFTFR)(K)R/G/F/T P E/A/F(R)               | 148.07 | 452.9069 | 1356.706 | 0.0003   | 0.2  | 8.75 | 27264.5  | 5.09 HUMAN  | Q00299 | Chloride intracellular channel protein 1                                          |
| 18217 | dirMS_041712_NAR_120mM_plus.20228.20228.3  | 3 | 6.51 | 0.278E+05       | (KRIUNWH)(R)I/N/L/W/H/L/E/T/D(S)               | 159.48 | 470.5889 | 1409.754 | -0.0014  | -1   | 5.32 | 52024.6  | 5.82 HUMAN  | PE3151 | Serine/threonine protein phosphatase 2A 55 kDa regulatory subunit B alpha isoform |
| 18218 | dirMS_041712_NAR_20mM_plus.17573.17573.2   | 2 | 6.51 | 0.546E+04 M215m | (KJTLMDLH)(R)I/L/D/E/L/E/H/I/G/M(R)            | 193.07 | 760.8799 | 1504.755 | 15.9962  | 0.8  | 4    | 25225.7  | 9.52 HUMAN  | ET5944 | 60 kDa heat shock protein, mitochondrial (Fragment)                               |
| 18219 | dirMS_041712_NAR_20mM_plus.17625.17625.3   | 3 | 6.51 | 0.652E+04       | (KJITNLTK)(K)I/T/L/Q/L/D/I/Q/L/S/V(Y)K         | 192.92 | 562.6523 | 1685.943 | -0.0009  | 0.5  | 6    | 334221.3 | 6.44 HUMAN  | PI5204 | Desmoplakin                                                                       |
| 18220 | dirMS_041712_NAR_20mM_plus.18449.18449.2   | 2 | 6.51 | 0.177E+05       | (KRIINPGIT)(R)I/N/V/P/G/I/T/L/LN/V5(R)         | 198.83 | 634.8801 | 1268.757 | -0.0043  | -3.4 | 8.75 | 37884.5  | 11.27 HUMAN | H3B8M9 | 60S ribosomal protein L4                                                          |
| 18221 | dirMS_041712_NAR_30mM_plus2.18178.18178.2  | 2 | 6.51 | 0.299E+05       | (RISQVDE)(R)Q/V/E/E/E/L/F5/V(R)                | 149.15 | 661.8032 | 1322.659 | -0.0055  | -4.2 | 4.25 | 53377.8  | 5.74 HUMAN  | Q15149 | Plectin                                                                           |
| 18222 | dirMS_041712_NAR_30mM_plus2.19163.19163.2  | 2 | 6.51 | 0.224E+05       | (KJIVNYP)(K)I/T/D/N/P/V/L/A/L/T/G(K)           | 154.83 | 688.8539 | 1864.706 | -0.0051  | -3.7 | 4.37 | 23799.1  | 9.48 HUMAN  | P32284 | Peptidyl-prolyl cis-trans isomerase B                                             |
| 18223 | dirMS_041712_NAR_40mM_plus2.11217.11217.3  | 3 | 6.51 | 1.782E+04       | (KRIKLEED)(K)K/V/E/D/M/R/D/S(L)K               | 131.98 | 630.9764 | 1830.915 | -0.0007  | -4.0 | 4.25 | 34747.6  | 6.06 HUMAN  | Q00887 | 26S proteasome non-ATPase regulatory subunit 14                                   |
| 18224 | dirMS_041712_NAR_40mM_plus2.15430.15430.3  | 3 | 6.51 | 0.203E+05       | (KJHYTIGR)(K)K/V/T I/V/G/A/P/V/G/I/K/P/G/C(K)  | 156.62 | 624.683  | 1872.041 | -0.0067  | -3.6 | 10   | 91839.6  | 9.22 HUMAN  | BAE3P0 | ATP-citrate synthase                                                              |
| 18225 | dirMS_041712_NAR_40mM_plus2.17047.17047.3  | 3 | 6.51 | 0.441E+05       | (KJHIFPLAR)(R)H/P/L/A/T V P/A/V/S/A/E(K)       | 167.57 | 586.2346 | 1756.963 | -0.004   | -2.3 | 6.75 | 49012.3  | 4.9 HUMAN   | ABMU18 | Tubulin alpha-4A chain                                                            |
| 18226 | dirMS_041712_NAR_40mM_plus2.19523.19523.3  | 3 | 6.51 | 1.420E+05       | (KJIAEVE)(K)I/L/E/E/V/P/E/L/T/E/A/E(K)         | 181.82 | 615.9991 | 1845.984 | -0.0017  | -0.9 | 4.32 | 65036    | 6.82 HUMAN  | EP9U03 | Phosphoribosylaminoimidazoizoxanthine formyltransferase                           |
| 18227 | dirMS_041712_NAR_40mM_plus2.15811.15811.3  | 3 | 6.51 | 1.420E+05       | (KJIAEVE)(K)I/L/E/E/V/P/E/L/T/E/A/E(K)         | 181.82 | 615.9991 | 1845.984 | -0.0017  | -0.9 | 4.32 | 65036    | 6.82 HUMAN  | EP9U03 | Phosphoribosylaminoimidazoizoxanthine formyltransferase                           |
| 18228 | dirMS_041712_NAR_50mM_plus2.20246.20246.3  | 3 | 6.51 | 0.239E+05       | (KJIAEVE)(K)I/L/E/E/V/P/E/L/T/E/A/E(K)         | 181.82 | 615.9991 | 1845.984 | -0.0017  | -0.9 | 4.32 | 65036    | 6.82 HUMAN  | EP9U03 | Phosphoribosylaminoimidazoizoxanthine formyltransferase                           |
| 18229 | dirMS_041712_NAR_60mM_plus2.20625.20625.3  | 3 | 6.51 | 0.444E+05       | (KRIKPPQL)(R)C/R/P/D/L/V/L/V/L/S/L/E/K(A)      | 168.28 | 643.0146 | 1927.032 | -0.0025  | -1.3 | 6.07 | 63756.2  | 5.74 HUMAN  | Q15149 | Plectin                                                                           |
| 18230 | dirMS_041712_NAR_60mM_plus.9603.9603.3     | 3 | 6.51 | 1.561E+05       | (KIQDAAA)(R)D/S/A/V/A/V/G/V/Y/E(K)             | 108.02 | 486.5842 | 1457.691 | -0.0007  | -0.4 | 4.56 | 61378.2  | 5.24 HUMAN  | Q14247 | Src substrate cactin                                                              |
| 18231 | dirMS_041712_NAR_60mM_plus.5819.5819.3     | 3 | 6.51 | 1.745E+05       | (KRISSGS)(R)G/S/S(G)A/S/E/V/S/V/V/A/C/L/T/R(E) | 85.35  | 625.2525 | 1268.755 | -0.0018  | -1.4 | 4.68 | 53377.8  | 5.74 HUMAN  | Q15149 | Plectin                                                                           |
| 18232 | dirMS_041712_NAR_20mM_plus.13481.13481.3   | 3 | 6.5  | 0.787E+05 M221m | (KJIALTVS)(R)I/L/V/L/P/E/L/T/Q/G/M/F/D/A/K(N)  | 186.22 | 569.9577 | 1691.867 | 15.9913  | 0.1  | 4.37 | 42831.5  | 4.86 HUMAN  | AK8554 | HCC19350A4 isoform CRA_f                                                          |
| 18233 | dirMS_041712_NAR_30mM_minus.13533.13533.2  | 2 | 6.5  | 0.230E+05       | (KJFAFAQ)(K)F/A Q/A/E/V/N(R)                   | 172.28 | 541.2823 | 1081.543 | 0.0148   | 13.7 | 6    | 92752.5  | 4.76 HUMAN  | PI4625 | Endoplasmic                                                                       |
| 18234 | dirMS_041712_NAR_30mM_minus.18321.18321.2  | 2 | 6.5  | 0.401E+05       | (KJADIJVA)(R)I/A/D/L/A/V/L(K)                  | 154.62 | 453.7668 | 906.529  | -0.0032  | -3.5 | 5.88 | 11447.2  | 9.81 HUMAN  | C19J87 | Cytochrome c (Fragment)                                                           |
| 18235 | dirMS_041712_NAR_30mM_minus.12295.12295.3  | 3 | 6.5  | 1.232E+05       | (KJIVAKR)(K)I/D/V/A/K/E/P/L/V/D/V/D/P(K)       | 156.1  | 546.3068 | 1636.916 | -0.0098  | -6   | 4.23 | 24576.8  | 6.08 HUMAN  | EP9P06 | Protein arginine N-methyltransferase 1 (Fragment)                                 |
| 18236 | dirMS_041712_NAR_40mM_plus2.8818.8818.3    | 3 | 6.5  | 0.387E+04       | (KJILQVTR)(R)I/D/T/V/H/V/L/V/L/V(L)            | 138.7  | 498.2749 | 1493.812 | -0.0017  | -1.1 | 5.21 | 54815.2  | 9.17 HUMAN  | P35166 | Probable ATP-dependent RNA helicase DDX1                                          |
| 18237 | dirMS_041712_NAR_50mM_minus.12522.12522.3  | 3 | 6.5  | 1.307E+05       | (KJLYEQIL)(K)I/V/E/Q/L/V/E/E/K(L)K             | 193.22 | 530.9592 | 1590.874 | -0.0107  | -6.7 | 4.79 | 22046.7  | 5.8 HUMAN   | HOYI2M | Protein phosphatase 1 regulatory subunit 12A (Fragment)                           |
| 18238 | dirMS_041712_NAR_50mM_minus.5830.5830.3    | 3 | 6.5  | 1.354E+04       | (KJIALGGI)(R)Q/L/V/G/G/E/A/K/S/D/E/T/A/A(K)    | 138.62 | 643.0146 | 1927.032 | -0.0025  | -1.3 | 6.07 | 63756.2  | 5.74 HUMAN  | Q15149 | Plectin                                                                           |
| 18239 | dirMS_041712_NAR_60mM_minus.13014.13014.3  | 3 | 6.5  | 0.639E+05       | (KJHPTPIE)(K)I/H/P/T/V/E/E/G/F(K)              | 132.77 | 486.2642 | 1456.778 | -0.0014  | -1   | 6.75 | 52943.5  | 6.17 HUMAN  | ET92L0 | T-complex protein 1 subunit delta                                                 |
| 18240 | dirMS_041712_NAR_60mM_minus.18174.18174.3  | 3 | 6.5  | 1.465E+05       | (KJITKTR)(K)I/T/K/T/L/T/F/S/L/S(K)             | 127.47 | 620.8123 | 1271.79  | 5.049626 | -0.2 | 8.59 | 45578.2  | 7.83 HUMAN  | B4DLF2 | Isocitrate dehydrogenase [NADP]                                                   |
| 18241 | dirMS_041712_NAR_120mM_plus.11205.11205.4  | 4 | 6.5  | 1.346E+04       | (KJHIFHTR)(R)H/T/V/T/T D/D/P/V/K(K)            | 111.6  | 436.4888 | 1742.944 | -0.0102  | -5.8 | 6.75 | 31956.7  | 9.73 HUMAN  | BOU045 | Eukaryotic translation initiation factor 3 subunit D (Fragment)                   |
| 18242 | dirMS_041712_NAR_20mM_plus.19249.19249.2   | 2 | 6.5  | 0.181E+05       | (KJITLTOQ)(K)I/T/F/D/Q/L/L/D S/P(K)            | 203.47 | 730.9063 | 1460.8   | 0.0058   | 4    | 4.21 | 14643    | 11.93 HUMAN | F8VU46 | 60S ribosomal protein L18 (Fragment)                                              |
| 18243 | dirMS_041712_NAR_20mM_plus.8368.8368.2     | 2 | 6.5  | 0.106E+05 M406m | (KJIEYELN)(R)E/Y/G/E/L/V/N/V(K)                | 127.52 | 585.2801 | 1153.556 | 15.9971  | 1.9  | 4.53 | 56607.4  | 5.37 HUMAN  | F8V0B4 | Keratin, type I cytoskeletal 8                                                    |
| 18244 | dirMS_041712_NAR_20mM_plus2.11592.11592.2  | 2 | 6.5  | 1.731E+06       | (KJIDKAKR)(K)I/E/E/E/L/V/V/V(K)                | 114.23 | 643.8332 | 1292.651 | -0.0056  | -4.4 | 5.8  | 62850.8  | 6.56 HUMAN  | EP9U03 | Phosphoribosylaminoimidazoizoxanthine formyltransferase                           |
| 18245 | dirMS_041712_NAR_40mM_plus2.10017.10017.2  | 2 | 6.5  | 0.942E+04       | (KJYELQD)(K)I/E/E/L/D/S/L/V/S(K)               | 123.57 | 569.2912 | 1137.579 | -0.0035  | -3.1 | 4.53 | 32963.3  | 5.3 HUMAN   | F8VU64 | Keratin, type II cytoskeletal 8                                                   |
| 18246 | dirMS_041712_NAR_50mM_plus2.12580.12580.3  | 3 | 6.5  | 0.102E+05       | (KJYTSYTF)(K)Y/T/S/T F/T/P/V/H/A/V(T)K         | 130.45 | 578.611  | 1733.82  | -0.0019  | -1.1 | 8.2  | 56826.6  | 9.16 HUMAN  | PO0390 | Glutathione reductase, mitochondrial                                              |
| 18247 | dirMS_041712_NAR_50mM_plus2.14337.14337.3  | 3 | 6.5  | 1.883E+05       | (KJATLPSK)(K)A/T P/S/P/D/K/P/L(G)K             | 143.57 | 457.5906 | 1370.768 | -0.0106  | -7.7 | 8.64 | 118930.9 | 5.49 HUMAN  | P23214 | Ubiquitin-like modifier-activating enzyme 1                                       |
| 18248 | dirMS_041712_NAR_50mM_plus2.14595.14595.3  | 3 | 6.5  | 0.106E+06       | (KJHPSALR)(R)T/H/S/L/G P L A I Q/A/F(L)K       | 144.3  | 514.2745 | 1540.812 | -0.0029  | -1.9 | 6.85 | 141616.6 | 6.1 HUMAN   | B7ZM38 | Protein transport protein Sec24B                                                  |
| 18249 | dirMS_041712_NAR_60mM_plus2.15207.15207.3  | 3 | 6.5  | 2.488E+05       | (KJHMKVLE)(K)I/L/V/L/V/L/V/L/V(L)              | 148.49 | 643.5668 | 1848.699 | -0.001   | -0.1 | 6.06 | 63000.4  | 5.74 HUMAN  | Q15149 | Plectin                                                                           |
| 18250 | dirMS_041712_NAR_60mM_plus.17083.17083.3   | 3 | 6.5  | 2.344E+05 S440s | (KJADTSE)(K)K/A/Q/V/L/S/E/V/S(K)K              | 146.7  | 490.5979 | 1265.705 | 20.03739 | -3.7 | 9.7  | 73923.6  | 9.2 HUMAN   | C19K9V | Sorbin and SH3 domain-containing protein 2                                        |
| 18251 | dirMS_041712_NAR_60mM_plus.18580.18580.3   | 3 | 6.5  | 1.152E+05       | (KJICRVDI)(R)I/C/R/D/L/P A L/V/L               |        |          |          |          |      |      |          |             |        |                                                                                   |

|       |                                            |   |      |                 |                                                      |        |          |          |          |      |      |          |             |          |                                                                                   |
|-------|--------------------------------------------|---|------|-----------------|------------------------------------------------------|--------|----------|----------|----------|------|------|----------|-------------|----------|-----------------------------------------------------------------------------------|
| 18308 | dirMS_041712_NAR_30mM_plus2.10657.10657.2  | 2 | 6.47 | 0.148E+06       | (R)IGLSSG(R)G LVS S/G/G S A/D(R)N                    | 108.7  | 424.7147 | 848.422  | 0.0001   | 0.1  | 9.75 | 84561.9  | 5.87 HUMAN  | QBYS94-3 | Isomorph 3 of Collagen type IV alpha-3-binding protein                            |
| 18309 | dirMS_041712_NAR_30mM_plus2.2518.2318.2    | 2 | 6.47 | 0.180E+05       | (R)IAHELF(R)I(A)I(V)E/L L F F K(I)                   | 190.25 | 55.3331  | 1109.661 | -0.0016  | -1.4 | 6    | 19924.8  | 9.99 HUMAN  | FRU211   | 40S ribosomal protein S10                                                         |
| 18310 | dirMS_041712_NAR_30mM_plus2.4145.4145.2    | 2 | 6.47 | 0.132E+06 M93m  | (K)IKNMKA(K)I(V)E/L V P P K(I)                       | 69.125 | 580.3021 | 1738.891 | 0.0013   | 0.7  | 6.74 | 20940.9  | 10.04 HUMAN | QBRS07   | Cancer-related nucleoside-triphosphatase                                          |
| 18311 | dirMS_041712_NAR_30mM_plus2.6598.6598.2    | 2 | 6.47 | 0.566E+04       | (R)QAFNPT(R)Q(A)F/P N T R(R)H                        | 94.888 | 474.2833 | 947.469  | 0.0      | 0    | 9.75 | 56491.1  | 7.79 HUMAN  | B4D7G2   | Elongation factor 1-gamma                                                         |
| 18312 | dirMS_041712_NAR_40mM_plus2.6710.6710.2    | 2 | 6.47 | 0.168E+04       | (K)SLAAE(K)S(L)A(I)E/L E A R(Q)                      | 99.53  | 523.7589 | 1046.511 | -0.0008  | -0.7 | 4.25 | 53377.8  | 5.74 HUMAN  | Q15149   | Plectin                                                                           |
| 18313 | dirMS_041712_NAR_50mM_plus2.13448.13448.3  | 3 | 6.47 | 0.174E+05       | (K)ILGDVY(K)I(G)V(I)Y(V)N(D)A F G T A R(H)           | 138.82 | 545.6029 | 1634.792 | 0.002    | 1.2  | 5.21 | 41827.5  | 7 HUMAN     | BZ7F9A   | Phosphoglycerate kinase                                                           |
| 18314 | dirMS_041712_NAR_50mM_plus2.15270.15270.3  | 3 | 6.47 | 0.532E+05       | (K)IAHVE(K)I(V)E/L V P P P K(I) G N G V P P K(I)     | 145.45 | 640.0211 | 1892.054 | -0.0039  | -2.9 | 6.75 | 153379.3 | 5.48 HUMAN  | Q00610   | Cleavage heavy chain 2                                                            |
| 18315 | dirMS_041712_NAR_60mM_plus2.13860.13860.3  | 3 | 6.47 | 0.471E+05       | (R)IKVEMA(R)K(Y)E M F A(D)T(L)Q(S)R(Q)               | 128.72 | 543.9389 | 1629.805 | -0.0032  | -2   | 8.59 | 90004.9  | 6.14 HUMAN  | P55072   | Transitional endoplasmic reticulum ATPase                                         |
| 18316 | dirMS_041712_NAR_60mM_plus2.16173.16173.3  | 3 | 6.47 | 0.579E+05       | (R)IETHSAL(R)E T H S A(L)G V(L)S A G F A R(L)        | 141.82 | 514.2744 | 1540.812 | -0.0032  | -2.1 | 6.85 | 141616.6 | 5.14 HUMAN  | BZ7KM8   | Protein transport protein Sec24B                                                  |
| 18317 | dirMS_041712_NAR_120mM_minus.18200.18200.4 | 4 | 6.46 | 0.148E+05       | (R)IKVEVY(K)E M V E/L P L R H P A L F K(A)           | 154.6  | 420.737  | 1679.931 | 0.002    | 2.4  | 6.86 | 90004.9  | 5.14 HUMAN  | P55072   | Transitional endoplasmic reticulum ATPase                                         |
| 18318 | dirMS_041712_NAR_120mM_minus.6588.6588.2   | 2 | 6.46 | 0.830E+04       | (R)IKGEGS(R)K(G)E S/G/S V P P K(I)                   | 90.35  | 366.2836 | 1131.554 | 0.0058   | 5.1  | 8.75 | 14486.6  | 4.13 HUMAN  | B4D0C6   | Prostaglandin Endoperoxide Synthase 3                                             |
| 18319 | dirMS_041712_NAR_30mM_plus2.14047.14047.2  | 2 | 6.46 | 0.308E+05       | (K)KQFVDE(K)K(G)G V(L)G V(L)G D K(I)                 | 130.42 | 535.7027 | 1670.514 | 0.0018   | 1.3  | 4.21 | 27142.4  | 5.4 HUMAN   | E5K668   | Copin-1 (Fragment)                                                                |
| 18320 | dirMS_041712_NAR_30mM_minus2.7929.7929.2   | 2 | 6.46 | 0.268E+05       | (K)SLAAE(K)S(L)A(I)E/L E A R(Q)                      | 96.57  | 523.7597 | 1046.511 | 0.0008   | 0.8  | 4.25 | 53377.8  | 5.74 HUMAN  | Q15149   | Plectin                                                                           |
| 18321 | dirMS_041712_NAR_50mM_minus2.10297.10297.3 | 3 | 6.46 | 0.245E+05 M35m  | (K)JAASDA(K)A(S)D(A) m T L P/P T H P I R(L)          | 127.42 | 612.6486 | 1819.937 | 15.9942  | -0.4 | 5.32 | 12926.1  | 4.4 HUMAN   | K7EM20   | 14-3-3 protein epsilon (Fragment)                                                 |
| 18322 | dirMS_041712_NAR_50mM_minus2.14132.14132.3 | 3 | 6.46 | 0.268E+05       | (K)KGVN(P)K(G) V N L P G A(I)A(V)P A V S I K(D)      | 144.48 | 588.9987 | 1764.985 | -0.0039  | -2.2 | 6.07 | 30947.9  | 6.47 HUMAN  | H3B324   | Pyruvate kinase                                                                   |
| 18323 | dirMS_041712_NAR_50mM_minus2.15519.15519.3 | 3 | 6.46 | 0.415E+05       | (K)QGGG(K)G(G)G V(L)G P M H I P L V S D P K(RT)      | 157.37 | 593.1625 | 1743.958 | -0.0029  | -1.6 | 8.75 | 22382.2  | 8.65 HUMAN  | Q06830   | Perforin-1                                                                        |
| 18324 | dirMS_041712_NAR_50mM_minus2.18043.18043.3 | 3 | 6.46 | 0.436E+05       | (K)VLVSSM(K)I(V)L G S N H S/L P P K(I)               | 117.27 | 513.3077 | 1537.91  | -0.0015  | -1   | 8.76 | 25486.5  | 5.51 HUMAN  | JKNL6E   | Protein transport protein Sec16A                                                  |
| 18325 | dirMS_041712_NAR_50mM_minus2.7082.7082.3   | 3 | 6.46 | 0.246E+04       | (R)ILGSHPE(R)I(L)Q S H P S E A D L O L E K(I)        | 107.17 | 575.2885 | 1723.85  | 0.0012   | 0.7  | 4.4  | 482798.6 | 5.23 HUMAN  | ANG651   | Spectrin alpha chain, non-erythrocytic 1                                          |
| 18326 | dirMS_041712_NAR_60mM_minus.14961.14961.3  | 3 | 6.46 | 0.1720E+04      | (K)ILTDEAK(K)I(T)F D K A D V O(S)U(V)P L Q R(I)      | 143.08 | 595.9938 | 1785.97  | -0.0037  | -2   | 2.56 | 90316.8  | 5.52 HUMAN  | Q13263   | Transcription intermediary factor 1-beta                                          |
| 18327 | dirMS_041712_NAR_60mM_minus.16358.16358.3  | 3 | 6.46 | 0.381E+04       | (R)INVLPL(R)H H L L D V(I)T V C V D S G R(I)         | 69.15  | 580.3021 | 1738.891 | 0.0013   | 0.7  | 6.74 | 20940.9  | 10.04 HUMAN | QBRS07   | Cancer-related nucleoside-triphosphatase                                          |
| 18328 | dirMS_041712_NAR_60mM_minus.6022.6022.3    | 3 | 6.46 | 0.138E+05       | (K)LEEAEL(K)I(L)E A K A D A E S E R(Q)               | 92.41  | 492.8981 | 1476.681 | -0.0015  | -1   | 4.14 | 31923.6  | 4.85 HUMAN  | BZ7526   | Tropomyosin alpha-1 chain                                                         |
| 18329 | dirMS_041712_NAR_60mM_minus.6563.6563.3    | 3 | 6.46 | 0.572E+04       | (K)ELVSDA(K)K(L) V S/D A N Q H V(K)S                 | 99.22  | 413.8839 | 1239.633 | 0.0044   | 3.5  | 5.32 | 57818.1  | 5.52 HUMAN  | E9PH38   | Serine/threonine-protein phosphatase 2A 65 kDa regulatory subunit A alpha isoform |
| 18330 | dirMS_041712_NAR_120mM_plus.10797.10797.3  | 3 | 6.46 | 0.1748E+04      | (K)KIFYGE(K)K(Y)E F E S D A R(S)                     | 109.63 | 415.205  | 1424.595 | 0.0051   | 4.1  | 4.68 | 53316.6  | 6.01 HUMAN  | Q14204   | Cytoplasmic dynein 1 heavy chain 1                                                |
| 18331 | dirMS_041712_NAR_120mM_plus.10246.10246.2  | 2 | 6.46 | 0.936E+04       | (K)LEEAET(K)K(E) L E A I A T Y R(K)                  | 143.43 | 580.3169 | 1405.571 | -0.0052  | -5   | 4.53 | 43773.3  | 5.26 HUMAN  | RV8V29   | Keratin, type I cytoskeletal 18                                                   |
| 18332 | dirMS_041712_NAR_20mM_plus.14546.14546.2   | 2 | 6.46 | 0.389E+04 M185m | (K)KNMKA(K)I(V)E/L V P P P K(I)                      | 69.125 | 580.3169 | 1405.571 | -0.0052  | -2.4 | 9.75 | 56491.1  | 7.79 HUMAN  | ABN2C8   | Positive tubulin beta chain-like protein ENSP0000290317                           |
| 18333 | dirMS_041712_NAR_20mM_plus.18672.18672.2   | 2 | 6.46 | 0.427E+04       | (K)ILDVAV(K)I(L)D V A D T I T P P A R(Q)             | 199.85 | 717.9239 | 1542.853 | -0.0121  | -7.8 | 4.21 | 49883.7  | 7.3 HUMAN   | PA9411   | Elongation factor Tu, mitochondrial                                               |
| 18334 | dirMS_041712_NAR_40mM_plus2.10223.10223.3  | 3 | 6.46 | 0.267E+05 N611n | (R)IASSVY(R)A S V S V S S T S A G S N R(WT)          | 125.1  | 655.3008 | 1760.783 | 203.1404 | 12.8 | 8.79 | 77819.8  | 8.81 HUMAN  | EPG6A7   | FERM domain-containing protein 4B                                                 |
| 18335 | dirMS_041712_NAR_40mM_plus2.11555.11555.3  | 3 | 6.46 | 0.457E+04       | (K)IYYGFR(K)Y(Y)I G V R(Y)                           | 134.2  | 490.7122 | 818.42   | -0.0024  | -3   | 8.59 | 37328.2  | 9.57 HUMAN  | Z7E1X4   | Ferredoxin, mitochondrial (Fragment)                                              |
| 18336 | dirMS_041712_NAR_40mM_plus2.13058.13058.2  | 2 | 6.46 | 0.309E+05       | (R)IAQVQ(R)I(Q)I V A D P P S R(Q)                    | 142.78 | 523.6407 | 1617.463 | 0.002    | 1.9  | 9.79 | 35663.7  | 5.91 HUMAN  | MA91P3   | Epilakin                                                                          |
| 18337 | dirMS_041712_NAR_40mM_plus2.14743.14743.2  | 2 | 6.46 | 0.216E+04       | (K)IYGADH(K)Y G A D I E L V L P E A Q H K(A)         | 100.41 | 604.6467 | 1811.917 | -0.0081  | -4.5 | 4.31 | 111409.8 | 9.02 HUMAN  | FSH2F4   | C-1-tetrahydrofolate synthase, cytoplasmic                                        |
| 18338 | dirMS_041712_NAR_40mM_plus2.9643.9643.2    | 2 | 6.46 | 0.127E+05       | (K)IYFEAFS(K)F(I)E/L A F S K(I)                      | 120.15 | 446.2159 | 891.425  | -0.0002  | -0.2 | 6    | 20127.1  | 9.4 HUMAN   | HDY598   | Heat shock protein HSP 90-beta (Fragment)                                         |
| 18339 | dirMS_041712_NAR_50mM_plus2.14578.14578.3  | 3 | 6.46 | 0.540E+05       | (R)IQAKEL(R)A V A K E L P Q F A T T G I E N P L R(P) | 138.53 | 638.0091 | 1912.029 | -0.0159  | -8.8 | 6.14 | 58250.7  | 8.99 HUMAN  | B4E283   | Apoptosis inhibitor 5                                                             |
| 18340 | dirMS_041712_NAR_50mM_plus2.1735.1735.3    | 3 | 6.46 | 0.117E+05       | (R)IQAQV(K)I(V)E/L V P P P K(I)                      | 115.15 | 463.9247 | 1386.775 | -0.0039  | -0.6 | 6.62 | 14023.2  | 6.47 HUMAN  | Q04936   | Eukaryotic translation initiation factor 2A                                       |
| 18341 | dirMS_041712_NAR_60mM_plus.10462.10462.3   | 3 | 6.46 | 0.157E+06       | (K)IYFEDH(K)K(V)F E H D S V L V K N Q M(K)           | 111.77 | 492.8967 | 1476.679 | -0.0032  | -2.2 | 4.65 | 31975.7  | 6.55 HUMAN  | PI1078   | 5-formyltetrahydrofolate                                                          |
| 18342 | dirMS_041712_NAR_60mM_plus.10748.10748.3   | 3 | 6.46 | 0.128E+07 S303s | (R)IDHMM(R)H H M S G W I S V I P R E K(S)            | 114.77 | 654.9726 | 1759.833 | 203.0969 | 12.8 | 8.51 | 51648.4  | 5.55 HUMAN  | B7XG9B   | Protein phosphatase 1M                                                            |
| 18343 | dirMS_041712_NAR_60mM_plus.19109.19109.3   | 3 | 6.46 | 0.174E+05 M45t  | (R)IHTQV(R)R H T G Q V V L L T M L R(M)              | 189.18 | 524.9582 | 1369.762 | 203.2088 | 11.9 | 9.75 | 216055.5 | 4.9 HUMAN   | BZ7M41   | MPDZ protein                                                                      |
| 18344 | dirMS_041712_NAR_60mM_plus.6002.6002.3     | 3 | 6.46 | 0.394E+05 T43t  | (R)IEMELH(R)M E I E L H M Q I M Q I R(K)             | 85.95  | 476.2118 | 1416.625 | 15.9962  | 1.9  | 4.75 | 26419.2  | 5.1 HUMAN   | HDY987   | Splicing factor, proline- and glutamine-rich (Fragment)                           |
| 18345 | dirMS_041712_NAR_20mM_plus.7984.7984.2     | 2 | 6.45 | 0.909E+03       | (R)IAQVQ(R)I(Q)I V A D P P S R(Q)                    | 129.45 | 584.2733 | 1167.543 | -0.0036  | -1.1 | 5.88 | 26161.1  | 5.68 HUMAN  | EP9103   | Epilakin                                                                          |
| 18346 | dirMS_041712_NAR_30mM_minus2.10773.11244.2 | 2 | 6.45 | 0.291E+06 M209m | (R)IYTDQLS(R)T J D Q L G M P T H K(E)                | 114.17 | 646.8327 | 1276.635 | 16.0227  | 21.5 | 6.71 | 41848    | 8.94 HUMAN  | QB9W53-3 | Isomorph 3 of Chitinase domain-containing protein 1                               |
| 18347 | dirMS_041712_NAR_30mM_minus2.17346.17346.2 | 2 | 6.45 | 0.210E+05       | (R)IHGPEP(R)H G P E I P D S P I P R(S)               | 148.68 | 676.3255 | 1351.65  | -0.0064  | -4.8 | 6.75 | 5236.9   | 12.22 HUMAN | HDY653   | TMF-regulated nuclear protein 1 (Fragment)                                        |
| 18348 | dirMS_041712_NAR_30mM_minus2.15241.15241.3 | 3 | 6.45 | 0.425E+05       | (K)IGADVF(K)A D D P I V I T E V E N G S L G S K K(G) | 155.5  | 636.602  | 1907.971 | 0.0005   | 0.3  | 4.68 | 30947.9  | 6.47 HUMAN  | H3B324   | Pyruvate kinase                                                                   |
| 18349 | dirMS_041712_NAR_30mM_minus2.12417.12417.2 | 2 | 6.45 | 0.117E+05 S195s | (R)IYVSDS(R)I(V)E/L V P P P K(I)                     | 138.52 | 593.1625 | 1743.958 | -0.0027  | -1.7 | 8.79 | 44421.3  | 6.47 HUMAN  | Q04936   | Eukaryotic translation initiation factor 2A                                       |
| 18350 | dirMS_041712_NAR_60mM_minus2.15497.15497.3 | 3 | 6.45 | 0.592E+05 M147t | (K)IDGKVF(K)E V M K P F M A N Y S L N R(W)           | 146.73 | 576.9109 | 1712.879 | 15.9923  | 1.5  | 8.69 | 14683.8  | 5.19 HUMAN  | P31708   | Signal recognition particle 14 kDa protein                                        |
| 18351 | dirMS_041712_NAR_30mM_plus.11865.11865.2   | 2 | 6.45 | 0.136E+05       | (R)IILUEE(R)I(L)U/E S R(I)                           | 155.02 | 422.2674 | 843.53   | -0.0023  | -2.7 | 6    | 17222    | 10.53 HUMAN | PE2277   | 40S ribosomal protein S13                                                         |
| 18352 | dirMS_041712_NAR_30mM_plus.11908.11908.2   | 2 | 6.45 | 0.622E+03       | (K)IYGEPE(K)G I G P E V F V F N I G(K)               | 153.3  | 628.8232 | 1252.621 | 0.0165   | 13.2 | 4.53 | 76822.2  | 9.53 HUMAN  | PZ3246   | Splicing factor, proline- and glutamine-rich                                      |
| 18353 | dirMS_041712_NAR_30mM_plus.16764.16764.2   | 2 | 6.45 | 0.117E+05       | (R)IILQAE(R)I(L)E A I G I A T S P I D P K(I)         | 185.97 | 769.9362 | 1538.879 | -0.0017  | -8.9 | 4.37 | 33221.3  | 6.44 HUMAN  | PI5024   | Desmoplakin                                                                       |
| 18354 | dirMS_041712_NAR_30mM_plus.18750.18750.3   | 3 | 6.45 | 0.115E+05       | (K)IYVGNQ(K)V I G N Q S V L V E L A I A T P A R(Q)   | 160.20 | 577.9842 | 1731.939 | -0.0048  | -4.0 | 5.97 | 36157.9  | 8.65 HUMAN  | Q13011   | Debalin-5/Debalin-2/4)-dieneol-CoA isomerase, mitochondrial                       |
| 18355 | dirMS_041712_NAR_30mM_plus2.21365.21365.2  | 2 | 6.45 | 0.658E+03       | (R)IYVFNQ(R)R(V)F I G V L N L T V L V K(K)           | 127.37 | 658.8983 | 1316.794 | -0.0043  | -3.3 | 8.72 | 15791.7  | 9.22 HUMAN  | B4D5U6   | Heterogeneous nuclear ribonucleoproteins C1/C2                                    |
| 18356 | dirMS_041712_NAR_30mM_plus2.7142.7142.2    | 2 | 6.45 | 0.231E+05       | (R)IAQVYI(R)A Q I V I Y T R T(K)                     | 91.63  | 425.7397 | 850.478  | -0.0026  | -7.1 | 8.79 | 13798.9  | 4.17 HUMAN  | PE6281   | 5.1H human protein S25                                                            |
| 18357 | dirMS_041712_NAR_30mM_plus2.8640.8640.2    | 2 | 6.45 | 0.239E+05       | (K)IGYFSR(K)I(S)G F T S F A L N N R(K)               | 99.58  | 491.7488 | 982.484  | 0.0023   | 2.4  | 5.72 | 92752.5  | 10.76 HUMAN | 14A625   | Endoplasmic                                                                       |
| 18358 | dirMS_041712_NAR_30mM_plus2.11525.11525.3  | 3 | 6.45 | 0.567E+04       | (R)IADHDE(R)I(D)I T V A T P G R(I)                   | 134.08 | 498.2129 | 1492.817 | 0.0047   | 3.1  | 5.48 | 58195.2  | 7.33 HUMAN  | PZ3066   | Probable ATP-dependent RNA helicase DDX6                                          |
| 18359 | dirMS_041712_NAR_40mM_plus2.7789.7789.2    | 2 | 6.45 | 0.423E+04       | (R)IYLVNTE(R)R L N T N D V G S R(I)                  | 105.73 | 501.2719 | 1001.537 | -0.0009  | -0.9 | 5.81 | 17718.4  | 10.99 HUMAN | PE2629   | 40S ribosomal protein S18                                                         |



|       |                                            |      |                     |                                                          |        |            |          |          |       |      |          |       |       |        |                                                                        |
|-------|--------------------------------------------|------|---------------------|----------------------------------------------------------|--------|------------|----------|----------|-------|------|----------|-------|-------|--------|------------------------------------------------------------------------|
| 18526 | dirMS_041712_NAR_40mM_minus2.7803.7803.3   | 6.37 | 0.823E+04           | (K)TGVAAV(K)G V/A/V/N K P A E F T V D/A (K)H             | 124.67 | 549.6354   | 1646.875 | 0.0168   | -10.2 | 5.73 | 28472.4  | 5.71  | HUMAN | P21333 | Filamin-2                                                              |
| 18527 | dirMS_041712_NAR_50mM_minus.16536.16536.3  | 6.37 | 1.187E+04           | (R)EVLEL(R)R V/L/E/E L A A R D L V/S (K)E                | 161.82 | 610.3273   | 1828.965 | -0.0023  | 1.2   | 4.25 | 45984.6  | 6.24  | HUMAN | B4E16G | Galactokinase                                                          |
| 18528 | dirMS_041712_NAR_50mM_minus.12657.12657.1  | 6.37 | 1.252E+05           | (R)MREK(R)E M D A I E T/V/A/V/A (R)K                     | 120.87 | 481.2611   | 1441.721 | -0.0007  | 0.5   | 5.15 | 14471.2  | 6.25  | HUMAN | P00007 | Protein phosphatase 1 subunit zeta                                     |
| 18529 | dirMS_041712_NAR_120mM_plus.16538.16538.4  | 6.37 | 1.102E+06           | (R)YVLT(R)R V/A/E I V/H/L/T L D G T K R (S)              | 139.17 | 428.9885   | 1712.933 | -0.0008  | 0.05  | 6.75 | 21130    | 6.36  | HUMAN | HYD04  | V-type proton ATPase subunit b, brain isoform (Fragment)               |
| 18530 | dirMS_041712_NAR_120mM_plus.5715.5715.4    | 6.37 | 2.478E+05           | (R)KTGQR(R)K G Q A/P/G/S/Y T A A N K N (K)               | 93.5   | 450.4826   | 1798.908 | 0.0003   | 0.2   | 9.83 | 11447.2  | 6.81  | HUMAN | C3JF87 | Cytochrome c (Fragment)                                                |
| 18531 | dirMS_041712_NAR_20mM_plus.11664.11664.2   | 6.37 | 0.116E+05 M402m     | (R)MAGF(R)R M A/V G (A/T) L D V K (K)                    | 152.93 | 534.7743   | 1052.545 | 15.9968  | 1.8   | 5.59 | 87447.6  | 6.44  | HUMAN | Q15347 | Protein transport protein Sec23B                                       |
| 18532 | dirMS_041712_NAR_20mM_plus.13815.13815.2   | 6.37 | 0.246E+05 M98m      | (R)ITVIV(R)R I T V/I/V T G I G M T (K)A                  | 167.3  | 483.3671   | 1349.738 | 15.9928  | -1.5  | 5.35 | 20151.2  | 4.58  | HUMAN | G3V268 | Heat shock protein HSP 90-alpha (Fragment)                             |
| 18533 | dirMS_041712_NAR_20mM_plus.8169.8169.2     | 6.37 | 0.799E+04 M237m     | (R)YVHTT(R)R V/Vm/T/T L T T E (R)K                       | 126.28 | 615.8042   | 1214.620 | 15.9926  | 1.0   | 6    | 31604.9  | 6.88  | HUMAN | G3V475 | Eukaryotic translation initiation factor 2 subunit 1 (Fragment)        |
| 18534 | dirMS_041712_NAR_20mM_plus.8822.8822.2     | 6.37 | 0.130E+05           | (R)KLEEAEM(K)V L/E/E/A I N Q/A/V/N/P (K)K                | 135.6  | 616.353    | 1325.706 | -0.0077  | -5.5  | 4.53 | 73202    | 9.19  | HUMAN | C9M05  | Probable ATP-dependent RNA helicase DDX17                              |
| 18535 | dirMS_041712_NAR_30mM_plus.10464.10464.2   | 6.37 | 0.104E+06           | (K)MWNQ(K)Q V I N/Q/D E V W Y (R)                        | 107.5  | 567.7813   | 1134.554 | 0.0015   | 1.3   | 4.37 | 16660.2  | 10.31 | HUMAN | P39019 | 40S ribosomal protein S19                                              |
| 18536 | dirMS_041712_NAR_30mM_plus.15951.15951.2   | 6.37 | 0.189E+05           | (K)MFTGV(K)M T/V/Q/V/E V W Y (R)A                        | 136.52 | 609.317    | 1137.631 | -0.0004  | -3    | 6.04 | 56186.7  | 5.47  | HUMAN | B4D078 | T-complex protein 1 subunit gamma                                      |
| 18537 | dirMS_041712_NAR_30mM_plus.21598.21598.2   | 6.37 | 0.332E+05           | (R)KQVY(K)R M S/V/L/V Q/V G A (K)F                       | 168.03 | 488.808    | 1078.613 | -0.0023  | -2.9  | 9    | 5309.9   | 5.38  | HUMAN | Q15348 | Protein disulfide-isomerase A5                                         |
| 18538 | dirMS_041712_NAR_30mM_plus.5442.5442.2     | 6.37 | 0.184E+05           | (R)TDTGP (R)F D T/G/E P M G (R)                          | 82.82  | 482.2128   | 963.42   | -0.0017  | -1.8  | 4.37 | 85057.6  | 4.94  | HUMAN | P07900 | Heat shock protein HSP 90-alpha                                        |
| 18539 | dirMS_041712_NAR_40mM_plus.11933.11933.2   | 6.37 | 0.387E+04           | (R)QIVND (R)Q I T V D N/L P V G (R)S                     | 136.42 | 606.3387   | 1211.674 | -0.0041  | -3.4  | 5.84 | 22062.7  | 5.66  | HUMAN | P32119 | Peroxiredoxin-2                                                        |
| 18540 | dirMS_041712_NAR_40mM_plus.5461.5461.2     | 6.37 | 0.274E+04           | (K)TYGQST (K)Y G/Q/I S T V S (R)                         | 88.83  | 531.7462   | 1062.485 | 0.0001   | 0.1   | 8.25 | 14693.3  | 4.69  | HUMAN | C9J359 | 26S protease regulatory subunit 7 (Fragment)                           |
| 18541 | dirMS_041712_NAR_50mM_plus.10526.10526.3   | 6.37 | 0.258E+04           | (R)KAGSAS (K)A V/G S A S/V/G A Q S S L V Q Y V H K (S)   | 122.58 | 651.9457   | 1161.956 | 0.0001   | 0.1   | 5.4  | 20148.5  | 4.65  | HUMAN | B4E2V4 | Proteasome (Prosome, macropain) subunit, alpha type 5, isoform CRA_c   |
| 18542 | dirMS_041712_NAR_50mM_plus.11897.11897.3   | 6.37 | 4.438E+05 M327m     | (R)VAGGR(R)R V/A/G G P M/V/Q/L S L/V G V K (R)           | 131    | 562.6377   | 1669.905 | 15.9931  | -1    | 8.72 | 45924.5  | 5.29  | HUMAN | B4E1F3 | Selenium-binding protein 1 (Fragment)                                  |
| 18543 | dirMS_041712_NAR_50mM_plus.14121.14121.3   | 6.37 | 0.262E+05 T101      | (R)VAGGV (K)A D F G V S/A/Q I T A I A (K)R               | 143.72 | 529.6227   | 1605.885 | 79.9689  | 1.5   | 5.84 | 93117    | 8.93  | HUMAN | F5H5A3 | Mitogen-activated protein kinase kinase kinase                         |
| 18544 | dirMS_041712_NAR_50mM_plus.15444.15444.3   | 6.37 | 0.192E+05           | (R)KIVKVP (R)R V/V P G V T A V I E L/D E D T/G T F R (R) | 149.82 | 650.0048   | 1948.002 | -0.0024  | -1.2  | 4.32 | 68668.3  | 5.77  | HUMAN | B4D2X6 | Fragile X mental retardation syndrome-related protein 1                |
| 18545 | dirMS_041712_NAR_60mM_plus.11405.11405.3   | 6.37 | 0.460E+06           | (R)GSAVH (R)S S I A/V/W D L S E L V (R)                  | 116.45 | 442.5666   | 1325.681 | 0.0044   | 3.4   | 5.4  | 558007.1 | 5.44  | HUMAN | F5S107 | Epiplakin                                                              |
| 18546 | dirMS_041712_NAR_60mM_plus.18539.18539.3   | 6.37 | 0.184E+05           | (R)KHDELV (K)H D K L/E/V/L/V G L V (R)                   | 153.82 | 403.2318   | 1207.679 | 0.0015   | 1.2   | 5.32 | 17732.8  | 5.85  | HUMAN | F5GVI1 | U5 snRNP-decapping enzyme                                              |
| 18547 | dirMS_041712_NAR_120mM_minus.10406.10406.3 | 6.36 | 1.543E+05 M142m     | (K)VKEGEM (K)K E G V M I/V/E/A M E M (R)F                | 110.18 | 507.9186   | 1505.745 | 15.9962  | 0.8   | 4.79 | 18240.4  | 7.96  | HUMAN | P62937 | Peptidyl-prolyl cis-trans isomerase A                                  |
| 18548 | dirMS_041712_NAR_120mM_minus.9798.9798.3   | 6.36 | 1.201E+05           | (R)RFSGEG (R)R S R S G/V G E/V I/S/G L M (R)K            | 108.07 | 455.5929   | 1364.659 | 0.0038   | 2.8   | 5.87 | 90316.8  | 5.52  | HUMAN | Q13263 | Transcription intermediary factor 1-beta                               |
| 18549 | dirMS_041712_NAR_20mM_minus.7122.7122.2    | 6.36 | 0.311E+05 M33m      | (R)IDRHP (R)D R M P/E A A V K (S)                        | 118.67 | 559.7733   | 1101.545 | 15.9948  | -0.4  | 4.14 | 26091.9  | 4.7   | HUMAN | P51828 | Hepatoma-derived growth factor                                         |
| 18550 | dirMS_041712_NAR_30mM_minus.11911.11911.2  | 6.36 | 0.921E+05           | (R)KQKQK (K)W V D E G Q L/W/V/Q/V/N (K)R                 | 117.53 | 421.8676   | 1446.689 | -0.0011  | -1    | 4.14 | 40909.4  | 4.83  | HUMAN | F7E9V1 | Tubulin beta chain                                                     |
| 18551 | dirMS_041712_NAR_40mM_minus.6988.6988.2    | 6.36 | 0.585E+05           | (R)GYSFTT(R)R Y I S F T/T A E (R)E                       | 111.55 | 566.7661   | 1132.527 | -0.002   | -1.8  | 6    | 23901.9  | 5.28  | HUMAN | L3L1U9 | Actin, cytoplasmic 2, N-terminally processed (Fragment)                |
| 18552 | dirMS_041712_NAR_50mM_minus.15094.15094.3  | 6.36 | 1.133E+05           | (K)YSGDQ (K)V/S/G Q L E I L K (R)                        | 154.37 | 452.9385   | 1356.81  | -0.0087  | -6.4  | 6.11 | 12899.6  | 6.59  | HUMAN | W7E131 | Programmed cell death protein 5                                        |
| 18553 | dirMS_041712_NAR_50mM_minus.5706.5706.3    | 6.36 | 0.241E+05           | (K)ATCAP (K)T A/C/A/P Q/H/G A/P G P G A/D A S (K)F       | 93.83  | 597.279    | 1789.829 | -0.0062  | -3.4  | 6.79 | 83264.1  | 6.04  | HUMAN | E9PHF0 | Filamin-A                                                              |
| 18554 | dirMS_041712_NAR_50mM_minus.10202.10202.1  | 6.36 | 0.832E+05           | (R)KQVY(K)R M S/V/L/V Q/V G A (K)F                       | 116.45 | 488.808    | 1078.613 | -0.0023  | -2.9  | 9    | 5309.9   | 5.38  | HUMAN | Q15348 | Tubulin beta chain                                                     |
| 18555 | dirMS_041712_NAR_60mM_minus.14140.14140.3  | 6.36 | 0.202E+05           | (K)MVFLLDQ (R)M V/F A/L Q/V G A (K)F                     | 138.22 | 648.852    | 1296.705 | -0.0079  | -6    | 4.14 | 68623.1  | 6.88  | HUMAN | E9P3C5 | Methylcrotonyl-CoA carboxylase subunit alpha, mitochondrial (Fragment) |
| 18556 | dirMS_041712_NAR_60mM_minus.14761.14761.3  | 6.36 | 1.399E+05           | (R)KIKGDP (R)R K V G D P L L E/D T (R)M                  | 114.47 | 457.2595   | 1369.769 | -0.0046  | -3.4  | 5.46 | 47309.6  | 5.42  | HUMAN | B4DXY7 | 4-trimethylaminobutyraldehyde dehydrogenase                            |
| 18557 | dirMS_041712_NAR_60mM_minus.9794.9794.2    | 6.36 | 1.176E+05           | (K)KIKAPPE (K)K I I/A P P P (K)E                         | 114.68 | 518.8289   | 1036.651 | -0.0008  | -0.8  | 8.75 | 32616.5  | 5.18  | HUMAN | A6N176 | Actin, alpha skeletal muscle                                           |
| 18558 | dirMS_041712_NAR_60mM_minus.12482.12482.2  | 6.36 | 0.187E+05           | (K)KIDT (R)F 787 I/T V 954 S/S 626                       | 108.47 | 475.7871   | 954.556  | 0.006    | 0.6   | 5.66 | 32026    | 6.25  | HUMAN | Q15347 | Protein phosphatase 1 subunit zeta                                     |
| 18559 | dirMS_041712_NAR_20mM_plus.16006.16006.2   | 6.36 | 0.113E+05           | (R)GITPLP (R)G T P V/L/S P (R)K                          | 181.32 | 519.8306   | 1038.656 | -0.0018  | -1.8  | 8.75 | 276046.1 | 6.01  | HUMAN | P43327 | Fatty acid synthase                                                    |
| 18560 | dirMS_041712_NAR_20mM_plus.16683.16683.3   | 6.36 | 0.896E+04 S639s M14 | (R)WLLSAA (R)R L I S A/A M D C S/ R (T)                  | 185.8  | 549.9201   | 1422.687 | 219.0589 | 1.8   | 5.84 | 106347.2 | 7.44  | HUMAN | Q8N336 | WD repeat-containing protein                                           |
| 18561 | dirMS_041712_NAR_20mM_plus.16821.16821.2   | 6.36 | 0.139E+05           | (R)YVDNVP (K)T D I N F/V/A/L A T E G (K)                 | 186.67 | 682.8565   | 1364.706 | 0.0001   | 0.1   | 4.37 | 23799.1  | 9.48  | HUMAN | P23284 | Peptidyl-prolyl cis-trans isomerase                                    |
| 18562 | dirMS_041712_NAR_20mM_plus.17461.17461.2   | 6.36 | 0.309E+05           | (K)EVDSD (K)E G S I/E I D P I V P (R)K                   | 192.22 | 648.852    | 1296.705 | -0.0079  | -6    | 4.14 | 68623.1  | 6.88  | HUMAN | E9P3C5 | Methylcrotonyl-CoA carboxylase subunit alpha, mitochondrial (Fragment) |
| 18563 | dirMS_041712_NAR_30mM_plus.4805.4805.2     | 6.36 | 0.929E+05 M295m     | (K)MNMMA (K)R M I/V/A C D I P (R)H                       | 68.4   | 549.2125   | 1065.427 | 31.9993  | 0.4   | 5.84 | 50199.4  | 4.75  | HUMAN | A6N9Z2 | Tubulin beta-8 chain-like protein LOC203934                            |
| 18564 | dirMS_041712_NAR_30mM_plus.9122.9122.5     | 6.36 | 0.565E+05           | (R)IVAQEL (R)A/V/L/Q/L E (R)W                            | 102.67 | 414.7506   | 828.494  | 0.0001   | 0.2   | 5.97 | 53377.8  | 5.74  | HUMAN | Q15149 | Plectin                                                                |
| 18565 | dirMS_041712_NAR_30mM_plus.9201.9201.2     | 6.36 | 0.396E+05           | (R)KIVDAS (K)A T I/D A I S (K)T                          | 101.98 | 426.7266   | 852.446  | -0.0002  | -0.3  | 5.88 | 25381.9  | 10.49 | HUMAN | E9PQD7 | 40S ribosomal protein S2                                               |
| 18566 | dirMS_041712_NAR_40mM_plus.17386.17386.3   | 6.36 | 0.142E+05           | (R)IDWQDP (R)R I V K P G N U/L/V/D/P D T A V L K (L)     | 170.93 | 631.6874   | 1893.069 | -0.0215  | -11.4 | 4.43 | 47257    | 9.38  | HUMAN | P49841 | Glycogen synthase kinase-3 beta                                        |
| 18567 | dirMS_041712_NAR_40mM_plus.7965.7965.2     | 6.36 | 0.321E+05           | (R)KSLLENS (K)S S I/L/E/L G (R)K                         | 120.87 | 483.2611   | 1441.721 | -0.0007  | 0.5   | 6.75 | 21130    | 6.25  | HUMAN | F7E9V1 | Tubulin beta chain                                                     |
| 18568 | dirMS_041712_NAR_50mM_plus.16337.16337.3   | 6.36 | 0.452E+05           | (K)KQLEEN (K)Q L/G/E/H E/L/T/A L I Q (K)G                | 159.4  | 488.2224   | 1463.858 | -0.0054  | -3.7  | 6.75 | 103381.4 | 8.47  | HUMAN | K4D93  | Cullin 4B, isoform CRA_c                                               |
| 18569 | dirMS_041712_NAR_60mM_plus.12117.12117.3   | 6.36 | 1.377E+06 M200m S2  | (K)GPMsAA (K)G P l m s A V Y I E K I F V (R)             | 120.78 | 572.64     | 1496.793 | 219.1215 | 22.2  | 8.59 | 111896.2 | 6.12  | HUMAN | G6PXC3 | Thioredoxin domain-containing protein 11                               |
| 18570 | dirMS_041712_NAR_60mM_plus.7507.7510.3     | 6.36 | 1.964E+05           | (R)YVLEA (R)R L/A E V/A/V/G A D D I G (K)                | 97.83  | 427.2226   | 1279.653 | 0.0004   | 0.3   | 4.56 | 19186.1  | 4.48  | HUMAN | BD4256 | 14-3-3 protein zeta/delta                                              |
| 18571 | dirMS_041712_NAR_120mM_plus.5424.5424.2    | 6.35 | 1.134E+05           | (K)KMGDP (K)K S G I/E I D P I V P (R)K                   | 82.75  | 466.7187   | 932.429  | -0.0007  | 0.7   | 8.75 | 18789.1  | 6.77  | HUMAN | A2D082 | 14-3-3 protein eta (Fragment)                                          |
| 18572 | dirMS_041712_NAR_120mM_plus.5608.5608.3    | 6.35 | 7.06E+04            | (R)HSSSTSE (R)R S S T S/S/G I/T P T V (K)T               | 86.42  | 459.5703   | 1376.702 | -0.0053  | -1.8  | 8.75 | 102522.3 | 5.57  | HUMAN | F5H146 | Cytosolin-A                                                            |
| 18573 | dirMS_041712_NAR_20mM_minus.8591.8625.2    | 6.35 | 1.031E+05 M23m      | (K)YLYADP (K)K Y/L/V/A/D P M (K)A                        | 135.8  | 483.7514   | 950.502  | 15.994   | -1    | 5.83 | 7781.8   | 6.87  | HUMAN | E9P220 | Signal recognition particle 9 kDa protein                              |
| 18574 | dirMS_041712_NAR_30mM_minus.12093.12093.2  | 6.35 | 0.411E+04           | (K)KIALSG (K)S A L I/S/G F/G Y (R)K                      | 119.07 | 499.7499   | 998.505  | -0.0129  | -12.9 | 8.75 | 21925.1  | 5.16  | HUMAN | Q73340 | Programmed cell death protein 6                                        |
| 18575 | dirMS_041712_NAR_30mM_minus.13059.13059.2  | 6.35 | 0.281E+05           | (K)KSLLEPE (K)S Q L I/L/V/P G T D A (R)F                 | 124.52 | 644.8325   | 1286.659 | -0.0099  | -4.7  | 4.14 | 26091.9  | 5.68  | HUMAN | Q9PH00 | Epiplakin                                                              |
| 18576 | dirMS_041712_NAR_30mM_minus.13770.13770.2  | 6.35 | 0.432E+05           | (R)YVWGL (K)R M S/V/L/V Q/V G A (K)F                     | 116.45 | 488.808    | 1078.613 | -0.0023  | -2.9  | 9    | 5309.9   | 5.38  | HUMAN | F7E9V1 | Tubulin beta chain                                                     |
| 18577 | dirMS_041712_NAR_30mM_minus.7635.7635.2    | 6.35 | 0.848E+05           | (R)FJMSAR (R)F S/N/I/A/S/A (K)A                          | 95.77  | 419.2279   | 837.447  | 0.002    | 2.4   | 8.75 | 55322.1  | 8.4   | HUMAN | F5H5W3 | T-complex protein 1 subunit delta                                      |
| 18578 | dirMS_041712_NAR_40mM_minus.16115.16115.3  | 6.35 | 1.649E+05           | (R)EJELALL (R)E L/A I/L/G M M/D/P A E K D E (K)G         | 189.63 | 629.0034</ |          |          |       |      |          |       |       |        |                                                                        |

|       |                                             |   |      |           |                                                   |        |          |          |           |        |      |          |             |            |                                                                     |                                              |
|-------|---------------------------------------------|---|------|-----------|---------------------------------------------------|--------|----------|----------|-----------|--------|------|----------|-------------|------------|---------------------------------------------------------------------|----------------------------------------------|
| 18635 | dirMS_D41712_NAR_30nmM_plus.8515.8515.2     | 2 | 6.33 | 0.453E+05 | (KILAAGEI(K)I/A/V/G E A T R L)                    | 97.67  | 451.2545 | 901.51   | -0.0084   | -9.4   | 6    | 533778   | 6.74 HUMAN  | Q21549     | Plectin                                                             |                                              |
| 18636 | dirMS_D41712_NAR_30nmM_plus.8729.8729.2     | 2 | 6.33 | 0.632E+05 | (RISMPTSE(R)S M/P T5/G A L D R)                   | 99.5   | 517.761  | 1034.494 | 0.0012    | 1.2    | 5.55 | 61733.3  | 6.3 HUMAN   | P36871     | Phosphoglucomutase 1                                                |                                              |
| 18637 | dirMS_D41712_NAR_40nmM_plus.7682.7682.2     | 2 | 6.33 | 0.477E+05 | (KSNMYSV(L)S V/W/S/D/V/A/V/S/S T R I)             | 104.45 | 632.2436 | 1059.037 | -0.0223   | -11.8  | 8.59 | 1234.601 | 6.55 HUMAN  | P01774     | Triphosphatase isomerase                                            |                                              |
| 18638 | dirMS_D41712_NAR_50nmM_plus.10615.10615.2   | 2 | 6.33 | 1.153E+06 | (IDIGRSLS(R)D G/K(V)S/S D/V/V/L P R I)            | 122.85 | 737.3295 | 1473.78  | -0.0018   | -1.2   | 4.56 | 56607.4  | 5.37 HUMAN  | F8V84A     | Keratin, type II cytoskeletal 8                                     |                                              |
| 18639 | dirMS_D41712_NAR_50nmM_plus.18002.18002.3   | 3 | 6.33 | 0.249E+05 | (RIVTMFLP(R)R T/JM/V/L/C/L/H/N V R I)             | 162.78 | 467.267  | 1399.788 | -0.0014   | -1     | 9.73 | 21721.5  | 5.17 HUMAN  | H78235     | Aspartate--lRNA ligase, cytoplasmic (Fragment)                      |                                              |
| 18640 | dirMS_D41712_NAR_50nmM_plus.20729.20729.3   | 3 | 6.33 | 0.204E+05 | (RJAGKPV(R)R A/G K/P V I C/A/T Q/M/L/E/S M (X)K)  | 167.68 | 626.3278 | 1876.969 | -0.0005   | -0.3   | 8.64 | 18466.1  | 5.78 HUMAN  | H383U3     | Pyruvate kinase (Fragment)                                          |                                              |
| 18641 | dirMS_D41712_NAR_50nmM_plus.21685.21685.3   | 3 | 6.33 | 1.136E+06 | (KLTLLV(L)K T/T/P/L/A/N Q/V I G S K R I)          | 184.45 | 632.2436 | 1059.037 | -0.0223   | -11.8  | 8.59 | 1235.6   | 6.55 HUMAN  | E99149     | Regulation of nuclear pre-mRNA domain-containing protein 18         |                                              |
| 18642 | dirMS_D41712_NAR_60nmM_plus.12676.12676.3   | 3 | 6.33 | 0.566E+05 | (KGGKSP(K)S SVS/L S/V V/T P N D/V R I)            | 123.63 | 565.6098 | 1694.813 | 0.0016    | 0.9    | 6.74 | 63566.6  | 6.3 HUMAN   | P07686     | Beta-hexosaminidase subunit beta                                    |                                              |
| 18643 | dirMS_D41712_NAR_120nmM_minus.14632.14632.4 | 4 | 6.33 | 1.180E+05 | (KJGLDPA(K)G L/D P A R N V P P/V/G G H/A G/K T)   | 133.78 | 440      | 1756.982 | -0.0035   | -2.8   | 8.41 | 50199.9  | 4.75 HUMAN  | AN6N22     | Malate dehydrogenase                                                |                                              |
| 18644 | dirMS_D41712_NAR_20nmM_minus.7647.7647.2    | 2 | 6.32 | 0.224E+05 | (KJIVPWE(K)K T/V I P/E A/T S V K I T)             | 125.37 | 515.7883 | 1030.678 | -0.0086   | -8.3   | 5.66 | 35720    | 5.34 HUMAN  | BA4E38     | Src substrate cortactin                                             |                                              |
| 18645 | dirMS_D41712_NAR_20nmM_minus.9196.9196.3    | 3 | 6.32 | 0.343E+05 | (RJQTFAP(R)R Q/A I F A N T/D/V N/A R I)           | 104.32 | 440.5612 | 1133.67  | -0.0012   | -0.9   | 5.88 | 43779.3  | 5.26 HUMAN  | F8V84B     | Keratin, type II cytoskeletal 18                                    |                                              |
| 18646 | dirMS_D41712_NAR_30nmM_minus.12029.12029.2  | 2 | 6.33 | 0.240E+05 | (RIVFYDMM(R)R V/T P/E L P R I)                    | 119.7  | 483.279  | 1316.86  | -0.0007   | -0.4   | 5.83 | 21793.2  | 5.18 HUMAN  | F8V84C     | Dextrin                                                             |                                              |
| 18647 | dirMS_D41712_NAR_50nmM_minus.11228.11228.3  | 3 | 6.32 | 1.121E+05 | (RIVTYSV(R)T/V S/D V/D F/L A/E N A K G)           | 132.27 | 512.9239 | 1536.79  | -0.0063   | -4.1   | 4.55 | 52385    | 7.18 HUMAN  | BA4DQ8     | 6-phosphogluconate dehydrogenase, decarboxylating                   |                                              |
| 18648 | dirMS_D41712_NAR_50nmM_minus.12581.12581.3  | 3 | 6.32 | 0.106E+06 | (RJAGKPV(R)R A/G K/P V I C/A/T Q/M/L/E/S M I K I) | 139.83 | 636.9917 | 1876.969 | 0.0012    | 0.7    | 8.64 | 18466.1  | 5.78 HUMAN  | H383U3     | Pyruvate kinase (Fragment)                                          |                                              |
| 18649 | dirMS_D41712_NAR_50nmM_minus.15467.15467.3  | 3 | 6.32 | 1.225E+04 | (KICFQDA(K)C E/F Q D A/V L/E L S/L K R I)         | 105.65 | 577.2917 | 1729.847 | 0.014     | 8.1    | 4.68 | 61224.7  | 5.7 HUMAN   | P18089     | 60 kDa heat shock protein, mitochondrial                            |                                              |
| 18650 | dirMS_D41712_NAR_60nmM_minus.10579.10579.3  | 3 | 6.32 | 1.653E+05 | (KTAFCCKI(K)T A/V C/D V P P G L K I)              | 118.72 | 442.66   | 1262.72  | -0.005    | -3.8   | 8.41 | 50199.9  | 4.75 HUMAN  | AN6N22     | Tubulin beta-8 chain-like protein LOC260334                         |                                              |
| 18651 | dirMS_D41712_NAR_60nmM_minus.13796.13796.3  | 3 | 6.32 | 1.315E+04 | (RIVFDGK(R)F V D K O G N G V L/S/K E R I)         | 136.6  | 585.6277 | 1754.871 | -0.0022   | -1.3   | 4.56 | 21860.1  | 4.45 HUMAN  | F7EM83     | Calmodulin                                                          |                                              |
| 18652 | dirMS_D41712_NAR_60nmM_minus.6333.6333.3    | 3 | 6.32 | 1.712E+04 | (RISORJ(K)R TVE/G M/V H/A D/S K C/K I)            | 94.05  | 503.9042 | 1509.704 | -0.0055   | -3.7   | 6.11 | 15607.8  | 9.99 HUMAN  | BA4E01     | Proteasome (Prosome, macropain) subunit, beta type 2, isoform CRA_B |                                              |
| 18653 | dirMS_D41712_NAR_60nmM_minus.9878.9878.3    | 3 | 6.32 | 0.907E+04 | (RSLAMP(R)R I S A m P/H V/D N D K I)              | 114.9  | 520.2566 | 1339.668 | 219.07878 | 8.7    | 5.21 | 9979.5   | 10.2 HUMAN  | HOYK3      | GMP reductase 2                                                     |                                              |
| 18654 | dirMS_D41712_NAR_120nmM_plus.13465.13465.4  | 4 | 6.32 | 1.127E+06 | (KIDVNEP(K)D K F N C/E/H V L V A D I/K M I)       | 123.87 | 452.9713 | 1088.864 | -0.0002   | -0.1   | 5.38 | 77799.7  | 9.09 HUMAN  | PS2272     | Heterogeneous nuclear ribonucleoprotein C                           |                                              |
| 18655 | dirMS_D41712_NAR_50nmM_plus.10726.10726.3   | 3 | 6.32 | 1.849E+05 | (RISDSTN(R)D I/S T N K/V/E Q/V G E R I)           | 124.08 | 583.6304 | 1748.881 | -0.0047   | -3.7   | 4.68 | 160653.1 | 6.11 HUMAN  | F8VU51     | YLP motif-containing protein 1                                      |                                              |
| 18656 | dirMS_D41712_NAR_50nmM_plus.12787.12787.3   | 3 | 6.32 | 0.495E+05 | (RJIIMDPN(R)I/M/D/P N I V G/S E H/Y D/V A R I)    | 134.63 | 605.9694 | 1815.869 | 0.0242    | 13.3   | 4.54 | 55307.5  | 5.55 HUMAN  | F8V8V9     | ATP synthase subunit beta                                           |                                              |
| 18657 | dirMS_D41712_NAR_50nmM_plus.15587.15587.3   | 3 | 6.32 | 1.101E+06 | (KRVKPGV(R)K V P G V T A I E L/D D/E/D/T P R I)   | 149.87 | 650.0048 | 1948.002 | -0.0024   | -1.2   | 4.32 | 88668.3  | 5.77 HUMAN  | BA4D26     | Xfrigo X mental retardation syndrome-related protein 1              |                                              |
| 18658 | dirMS_D41712_NAR_50nmM_plus.7206.7206.3     | 3 | 6.32 | 1.750E+04 | (KIDSTNY(K)S D/T N T/V Y A S/D K I)               | 103.52 | 473.8283 | 1417.896 | 0.0043    | 3      | 8.43 | 17045.4  | 4.25 HUMAN  | HOYK0      | Endoglinin (Fragment)                                               |                                              |
| 18659 | dirMS_D41712_NAR_60nmM_plus.12570.12570.3   | 3 | 6.32 | 0.813E+04 | (KIDGKLV(K)K C/L V/S/G M/G D/P/V R I)             | 136.28 | 522.2648 | 1564.758 | 0.0022    | 1.62   | 6.74 | 26012.2  | 6.74 HUMAN  | PS2787     | Proteasome subunit alpha type-2                                     |                                              |
| 18660 | dirMS_D41712_NAR_60nmM_plus.18720.18720.3   | 3 | 6.32 | 1.396E+06 | (RIVSFLFA(R)S/F E L F A D K V P K I)              | 155.83 | 460.5914 | 1379.577 | 0.0027    | 2      | 6.04 | 13378.8  | 6.27 HUMAN  | CJ1557     | Peptidyl-prolyl cis-trans isomerase                                 |                                              |
| 18661 | dirMS_D41712_NAR_60nmM_plus.7361.7361.3     | 3 | 6.32 | 0.134E+05 | (KQALIQH(K)A L/Q/H T/P E A Q R I)                 | 92.23  | 421.8971 | 1263.68  | -0.0037   | -2.9   | 6.79 | 15660.9  | 10.38 HUMAN | IL31V9     | FLVCH family member 2                                               |                                              |
| 18662 | dirMS_D41712_NAR_120nmM_minus.16027.16027.4 | 4 | 6.31 | 2.473E+05 | (KKGDDGLG(K)G Q/G/L G P M/V H I/P L V S D P R T)  | 141.73 | 477.1939 | 1907.053 | -0.0034   | -1.8   | 9.99 | 22338.2  | 8.65 HUMAN  | QD8930     | Peroxiredoxin-1                                                     |                                              |
| 18663 | dirMS_D41712_NAR_120nmM_minus.21362.21362.3 | 3 | 6.31 | 0.216E+05 | (KIDVNEP(K)D K F N C/E/H V L V A D I/K M I)       | 123.87 | 452.9713 | 1088.864 | -0.0002   | -0.1   | 5.38 | 77799.7  | 9.09 HUMAN  | PS2272     | Putative tubulin beta-8 chain-like protein ENSP0000230377           |                                              |
| 18664 | dirMS_D41712_NAR_30nmM_plus.16602.16602.2   | 2 | 6.31 | 0.203E+05 | (KIMIFG(K)M I/F V/G/V K I)                        | 144.4  | 404.2383 | 807.48   | -0.014    | -12.9  | 8.5  | 11447.2  | 9.81 HUMAN  | CJ19CF     | Cytocokerin 2 (Fragment)                                            |                                              |
| 18665 | dirMS_D41712_NAR_30nmM_minus.18350.18350.2  | 2 | 6.31 | 0.100E+05 | (KJISDFL(K)S C/D F/S/S/F R I)                     | 133.58 | 559.7501 | 1118.944 | -0.0006   | -0.5   | 5.55 | 42963.5  | 5.19 HUMAN  | P35227     | Serin B6                                                            |                                              |
| 18666 | dirMS_D41712_NAR_30nmM_plus.8652.8652.2     | 2 | 6.31 | 0.250E+05 | (KLTVYSS(K)I L/T/V/S/D R I)                       | 101.38 | 462.7452 | 924.479  | 0.0006    | 5      | 5.83 | 15838.9  | 7.03 HUMAN  | HOYJ50     | Propionyl-CoA carboxylase alpha chain, mitochondrial (Fragment)     |                                              |
| 18667 | dirMS_D41712_NAR_30nmM_plus.11447.11447.3   | 3 | 6.31 | 0.603E+05 | (RIVPQD(R)R P/H P E/H V L V A D I/K M I)          | 123.87 | 452.9713 | 1088.864 | -0.0002   | -0.1   | 5.38 | 77799.7  | 9.09 HUMAN  | PS2272     | Beta-actin-like protein 2                                           |                                              |
| 18668 | dirMS_D41712_NAR_50nmM_minus.10418.10418.3  | 3 | 6.31 | 0.723E+04 | (RILTSPV(K)R L/T/S/P V S/T L Q/T R I)             | 6.31   | 127.37   | 480.6    | 1439.785  | 0.0002 | 0.1  | 6.74     | 58760.2     | 5.26 HUMAN | QZ72N6                                                              | Ankyrin repeat domain-containing protein 130 |
| 18669 | dirMS_D41712_NAR_50nmM_minus.12455.12455.3  | 3 | 6.31 | 0.957E+05 | (RJAGKPV(R)R A/G K/P V I C/A/T Q/M/L/E/S M I K I) | 139.72 | 636.9917 | 1876.969 | 0.0012    | 0.7    | 8.64 | 18466.1  | 5.78 HUMAN  | H383U3     | Pyruvate kinase (Fragment)                                          |                                              |
| 18670 | dirMS_D41712_NAR_50nmM_minus.14655.14655.3  | 3 | 6.31 | 0.434E+04 | (RJIQALEE(R)Q/A/L E A L E L O/V A/S S K I T)      | 151.28 | 541.9562 | 1623.87  | -0.016    | -9.9   | 5.4  | 167855.2 | 5.34 HUMAN  | QO8378     | Golgin subfamily A member 3                                         |                                              |
| 18671 | dirMS_D41712_NAR_50nmM_minus.7042.7042.3    | 3 | 6.31 | 0.174E+05 | (RISALEEA(R)S A I E E A A D U P T P K T I)        | 106.92 | 529.6012 | 1586.791 | -0.0019   | -1.1   | 4.41 | 18924.5  | 6.86 HUMAN  | QBW12      | PEST proteolytic signal-containing nuclear protein                  |                                              |
| 18672 | dirMS_D41712_NAR_50nmM_minus.7854.7854.3    | 3 | 6.31 | 1.588E+04 | (RILGMAP(R)G A/A I P E/S S A/V A G K R Q)         | 111.32 | 592.9614 | 1778.876 | -0.0066   | -3.7   | 4.5  | 30276.7  | 5.55 HUMAN  | E22290     | NSCL cofactor p47                                                   |                                              |
| 18673 | dirMS_D41712_NAR_60nmM_minus.10850.10850.3  | 3 | 6.31 | 1.544E+05 | (RJMIMKE(R)R M S K V E D E Q/M/L/N Q/N K I)       | 119.9  | 647.3011 | 1923.897 | 15.9195   | -1.8   | 4.68 | 40069.4  | 4.83 HUMAN  | F7EVR1     | Tubulin beta chain                                                  |                                              |
| 18674 | dirMS_D41712_NAR_60nmM_minus.19961.19961.3  | 3 | 6.31 | 0.817E+05 | (RISAMLEE(R)I/A/L/V E L Q/L/V L R I)              | 102.62 | 461.6287 | 1382.873 | -0.0014   | -1     | 8.75 | 280326.9 | 5.48 HUMAN  | F75369     | Filamin-B                                                           |                                              |
| 18675 | dirMS_D41712_NAR_20nmM_plus.12439.12439.2   | 2 | 6.31 | 0.176E+05 | (KIVPVEP(K)K I/H V E T A R I)                     | 158.85 | 475.7818 | 159.556  | 0.0006    | 0.6    | 5.66 | 73202    | 9.19 HUMAN  | CJ1MUS     | Probable ATP-dependent RNA helicase XD17                            |                                              |
| 18676 | dirMS_D41712_NAR_20nmM_plus.17997.17997.2   | 2 | 6.31 | 0.200E+05 | (RIVPQD(R)R P/H P E/H V L V A D I/K M I)          | 123.87 | 452.9713 | 1088.864 | -0.0002   | -0.1   | 5.38 | 77799.7  | 9.09 HUMAN  | PS2272     | Keratin, type I cytoskeletal 18                                     |                                              |
| 18677 | dirMS_D41712_NAR_20nmM_plus.9684.9684.2     | 2 | 6.31 | 0.120E+05 | (KIVGQD(K)K V A G D/G S/V D F Q I K I)            | 138.13 | 617.8225 | 1234.643 | -0.0049   | -4     | 5.81 | 17127.4  | 10.05 HUMAN | AMU827     | Small ubiquitin-related modifier 3                                  |                                              |
| 18678 | dirMS_D41712_NAR_40nmM_plus.6469.6469.2     | 2 | 6.31 | 0.144E+05 | (KIFENLCK(K)F/E/N/L/C/V K I)                      | 97.68  | 405.6971 | 810.381  | -0.0055   | -6.8   | 6    | 85057.6  | 4.94 HUMAN  | P07900     | Heat shock protein HSP 90-alpha                                     |                                              |
| 18679 | dirMS_D41712_NAR_50nmM_plus.13966.13966.3   | 3 | 6.31 | 0.121E+06 | (KIDLAGO(K)K I/L8 G/C I/H G S L N V K I)          | 140.62 | 461.9061 | 1381.705 | -0.0012   | -0.8   | 6.74 | 45578.2  | 7.83 HUMAN  | BA4D12     | Isochrater dehydrogenase (NADP)                                     |                                              |
| 18680 | dirMS_D41712_NAR_50nmM_plus.19726.19726.3   | 3 | 6.31 | 2.800E+05 | (RJDFAH(R)R F/N H N V/L I/S/L G L K I)            | 171.83 | 538.6223 | 1598.854 | -0.0017   | -0.8   | 5.32 | 20931.1  | 10.28 HUMAN | Q6R4N4     | 60S ribosomal protein L10 (Fragment)                                |                                              |
| 18681 | dirMS_D41712_NAR_50nmM_plus.2193.2193.3     | 3 | 6.31 | 0.895E+04 | (KISGALKEE(K)S A/E/L E L E L V A R I Q)           | 181.4  | 535.3092 | 1603.917 | -0.0036   | -2.2   | 4.4  | 52378.2  | 6.32 HUMAN  | CJ0264     | 60S proteasome non-ATPase regulatory subunit 6                      |                                              |
| 18682 | dirMS_D41712_NAR_50nmM_plus.7710.7710.3     | 3 | 6.31 | 1.386E+05 | (RILGTGTP(R)G/T/P E L S T A R E K I)              | 106.27 | 434.5738 | 1301.706 | 0.0009    | 0.7    | 6.14 | 54427.4  | 5.96 HUMAN  | K4D109     | Acetyl-CoA carboxylase 1                                            |                                              |
| 18683 | dirMS_D41712_NAR_50nmM_plus.10041.10041.3   | 3 | 6.31 | 1.962E+05 | (KIVTACKE(K)K A/V/C D/P R P K M I)                | 110.35 | 442.9125 | 1326.72  | 0.0013    | 2.3    | 8.41 | 50199.4  | 4.75 HUMAN  | AN6N22     | Tubulin beta-8 chain-like protein LOC260334                         |                                              |
| 18684 | dirMS_D41712_NAR_60nmM_plus.12102.12102.3   | 3 | 6.31 | 1.109E+06 | (KIVAPREI(K)K V I P R E L F V T/S L K I)          | 120.68 | 459.257  | 1375.758 | -0.0015   | -2.1   | 6.19 | 36914.7  | 6.33 HUMAN  | P14550     | Alcohol dehydrogenase (NADP+)                                       |                                              |
| 18685 | dirMS_D41712_NAR_120nmM_minus.17663.17663.3 | 3 | 6.31 | 1.422E+04 | (KIVGPTG(K)K V I P P E L R D I/R I)               | 159.25 | 517.2624 | 1549.725 | -0.0016   | -1.6   | 5.96 | 26790.7  | 6.05 HUMAN  | Q13085     | Acetyl-CoA carboxylase 1                                            |                                              |
| 18686 | dirMS_D41712_NAR_120nmM_minus.19064.19064.4 | 4 | 6.3  | 1.174E+05 | (RISLDPLT(R)R L D/L/T/P E/H/L P L R I)            | 158.88 | 415.734  | 1659.954 | -0.0023   | -1.4   | 6.47 | 38779.2  | 5.93 HUMAN  | Q9C8C6     | mGppx phosphatase                                                   |                                              |
| 18687 | dirMS_D41712_NAR_120nmM_minus.7049.7049.2   | 2 | 6.3  | 0.148E+05 | (KJHNAAF(K)H N I/A/V P/C/V K I)                   | 92.42  | 505.7282 | 1010.451 | -0.0021   | -2.1   | 8.6  | 36856.1  | 8.55 HUMAN  | HY4L4A     | Sorbitol dehydrogenase                                              |                                              |
|       |                                             |   |      |           |                                                   |        |          |          |           |        |      |          |             |            |                                                                     |                                              |























|       |                                            |   |      |   |          |                                                      |       |          |          |           |       |         |          |       |        |                                |                                                                                                |
|-------|--------------------------------------------|---|------|---|----------|------------------------------------------------------|-------|----------|----------|-----------|-------|---------|----------|-------|--------|--------------------------------|------------------------------------------------------------------------------------------------|
| 19725 | dirMS_041712_NAR_60mM_minus.10730.10730.3  | 3 | 5.85 | 0 | 1.89E+05 | (K)TGNLGN(K)G/N L/G N/V/V/H I E R(Q)                 | 12003 | 436.9057 | 1308.702 | 0.0007    | 0.5   | 6.41    | 14478.1  | 9.37  | HUMAN  | CS1909                         | 60S ribosomal protein L22-like 1                                                               |
| 19726 | dirMS_041712_NAR_60mM_minus.11841.11841.3  | 3 | 5.85 | 1 | 4.61E+05 | (R)HSMK(R)M S/M K E V D E(V)G(M)H L V R(Q)N(K)N      | 12558 | 647.3011 | 1921.897 | 15.9195   | -1.8  | 4.68    | 40069.4  | 4.83  | HUMAN  | E7WR18                         | Tubulin beta chain                                                                             |
| 19727 | dirMS_041712_NAR_60mM_minus.11894.11894.3  | 3 | 5.85 | 0 | 3.76E+05 | (K)QWVQ(K)Q V I D V L G G G G V Y I(K)               | 12558 | 647.3011 | 1921.897 | 15.9195   | -1.8  | 4.68    | 40069.4  | 4.83  | HUMAN  | E7WR18                         | Tubulin beta chain                                                                             |
| 19728 | dirMS_041712_NAR_60mM_minus.16396.16396.3  | 3 | 5.85 | 1 | 1.35E+04 | (R)FQSGD(R)G/D S F D H(V)G(L)G R I(T)                | 10025 | 51.2628  | 1588.233 | 0.0162    | 10.2  | 6.74    | 104619   | 5.75  | HUMAN  | F8W904                         | Exportin-2                                                                                     |
| 19729 | dirMS_041712_NAR_60mM_minus.6312.6312.3    | 3 | 5.85 | 1 | 6.98E+04 | (R)JATEGM(R)A/EV I G M V V A D K C S(K)              | 9403  | 503.9042 | 1509.704 | -0.0055   | -3.7  | 6.11    | 156078   | 9.99  | HUMAN  | B4E0P1                         | Protaxone (Protose, macrocain) subunit, beta type, 2', isoform CRA_B                           |
| 19730 | dirMS_041712_NAR_120mM_plus.8153.8153.3    | 3 | 5.85 | 0 | 2.72E+05 | (K)HEZND(K)H E/V I G M V D I C G G G V Y I(K)        | 9622  | 492.8886 | 1476.654 | -0.0024   | -1.6  | 5.32    | 48311.8  | 4.29  | HUMAN  | Z27797                         | Calreticulin                                                                                   |
| 19731 | dirMS_041712_NAR_20mM_plus.13386.13386.2   | 3 | 5.85 | 0 | 1.67E+05 | (R)ETETRA(R)E I T P P A V V I T K(T)                 | 10676 | 683.3671 | 1265.737 | -0.0010   | -7.6  | 8.26    | 74292.2  | 6.79  | HUMAN  | P23296                         | Carnitine O-palmitoyltransferase 2, mitochondrial                                              |
| 19732 | dirMS_041712_NAR_20mM_plus.15755.15755.3   | 3 | 5.85 | 0 | 8.77E+03 | (R)ISSPYN(R)S V F V Y N G L T Q V G Q(K)C            | 19737 | 490.9251 | 1470.759 | 0.002     | 1.4   | 8.31    | 17630.6  | 11.62 | HUMAN  | IL3L05                         | Profilin-1 (Fragment)                                                                          |
| 19733 | dirMS_041712_NAR_30mM_plus.22590.22590.3   | 3 | 5.85 | 1 | 5.00E+05 | (R)JALTVPE(R)A L T V P / R E L T Q V Q F D(A)K       | 17577 | 553.9697 | 1659.895 | -0.0007   | -0.4  | 4.37    | 40069.4  | 4.83  | HUMAN  | E7WR18                         | Tubulin beta chain                                                                             |
| 19734 | dirMS_041712_NAR_30mM_plus.2522.2522.2     | 2 | 5.85 | 0 | 1.98E+05 | (R)LLGQW(R)A/L I G W G G G G R(A)                    | 8072  | 408.2308 | 815.452  | -0.0021   | -2.5  | 9.75    | 7079.2   | 10.03 | HUMAN  | O9M6M4                         | Protein LOC100563515                                                                           |
| 19735 | dirMS_041712_NAR_40mM_plus.4570.4570.2     | 2 | 5.85 | 0 | 2.03E+05 | (R)YGGG(R)Y/V L G G G G G R(A)                       | 7608  | 501.7171 | 1002.428 | -0.0006   | -6.6  | 6       | 64795.2  | 8.88  | HUMAN  | PL4886                         | Heterogeneous nuclear ribonucleoprotein L                                                      |
| 19736 | dirMS_041712_NAR_50mM_plus.12578.12578.3   | 3 | 5.85 | 1 | 1.91E+05 | (R)LEQDGR(R)A/L V I D V L G G G V Y I(K)             | 13407 | 508.1754 | 997.407  | -0.0017   | -4    | 4.41    | 22452.9  | 6.99  | HUMAN  | IL3L05                         | Profilin-1 (Fragment)                                                                          |
| 19737 | dirMS_041712_NAR_50mM_plus.12766.12766.3   | 3 | 5.85 | 0 | 5.03E+05 | (R)IMDPN(R)M A/P N I V/G S E V H D Y(R)A             | 13462 | 605.9694 | 1815.869 | 0.0242    | 13.3  | 4.54    | 55307.5  | 5.25  | HUMAN  | F8VY99                         | ATP synthase subunit beta                                                                      |
| 19738 | dirMS_041712_NAR_60mM_plus.10577.10577.3   | 3 | 5.85 | 0 | 1.17E+04 | (R)JCGAAL(R)G/A I A/L A/V G Q(L)H(Q)R                | 11338 | 422.8929 | 1266.674 | -0.0094   | -7.4  | 9.75    | 47032.8  | 6.83  | HUMAN  | E7L0V0                         | DNA-dependent protein kinase catalytic subunit                                                 |
| 19739 | dirMS_041712_NAR_60mM_plus.20866.20866.3   | 3 | 5.85 | 1 | 1.40E+05 | (K)TPTNTR(K)T F/V N I/T P/A I G V E V I G V K D R(S) | 16075 | 639.0248 | 1915.065 | -0.0049   | -2.6  | 5.74    | 17630.6  | 11.62 | HUMAN  | IL3L05                         | Profilin-1 (Fragment)                                                                          |
| 19740 | dirMS_041712_NAR_120mM_plus.14651.14651.4  | 4 | 5.84 | 1 | 1.24E+05 | (R)SMEEA(K)S I/E V/A M/V A/T A/L R(K)E               | 12316 | 462.1548 | 1595.958 | 0.05      | 6.76  | 39795.8 | 9.08     | HUMAN | H3B2N4 | Fructose-bisphosphate aldolase |                                                                                                |
| 19741 | dirMS_041712_NAR_20mM_minus.11637.11637.3  | 3 | 5.84 | 0 | 2.64E+05 | (R)GILQ(N)R(S) A/L G I(N) P/V A/T S/A A(K)A          | 17455 | 471.2674 | 1411.79  | -0.0049   | -2.9  | 8.75    | 31718.5  | 7.17  | HUMAN  | E7L0T4                         | Glyceraldehyde-3-phosphate dehydrogenase                                                       |
| 19742 | dirMS_041712_NAR_20mM_minus.12308.12308.2  | 2 | 5.84 | 0 | 1.67E+05 | (R)JAAVGR(R)A A/V I I/G P D V F A(K)I                | 17153 | 544.3103 | 1087.615 | -0.0013   | -1.2  | 5.88    | 266161   | 5.68  | HUMAN  | E9PPU0                         | Epiplakin                                                                                      |
| 19743 | dirMS_041712_NAR_20mM_minus.7414.7414.2    | 2 | 5.84 | 0 | 6.48E+04 | (R)ASGGT(R)A/V I I/G T S F F I I G V(K)              | 947   | 657.7477 | 1154.569 | 1559.9193 | -10.1 | 6.05    | 87229.4  | 11.63 | HUMAN  | Q00534                         | von Willebrand factor A domain-containing protein 5A                                           |
| 19744 | dirMS_041712_NAR_40mM_minus.16105.16105.3  | 3 | 5.84 | 1 | 6.69E+05 | (R)ELALK(R)E L A/L V G I M D/P A E F E E(K)G         | 18958 | 520.0034 | 1684.999 | -0.003    | -4.6  | 4.18    | 25148.6  | 6     | HUMAN  | P30841                         | Perlecanin-6                                                                                   |
| 19745 | dirMS_041712_NAR_40mM_minus.17703.17703.3  | 3 | 5.84 | 0 | 4.17E+05 | (R)DTDFLR(R)D T I G I F D O L H M L(K)K              | 17032 | 473.5826 | 1402.74  | 15.9933   | -1.1  | 5.21    | 64302.5  | 6.4   | HUMAN  | 6IAHCF                         | X-ray repair complementing defective repair in Chinese hamster cells 6 (Ku autoantigen, TRD6A) |
| 19746 | dirMS_041712_NAR_50mM_minus.8286.8286.3    | 3 | 5.84 | 1 | 1.14E+05 | (R)KTSDDV(K)K L T D D V K E/V I(Y)N(L)               | 11572 | 480.252  | 1438.742 | -0.001    | -0.7  | 4.56    | 12573.5  | 10.39 | HUMAN  | E9P550                         | 40S ribosomal protein S13 (Fragment)                                                           |
| 19747 | dirMS_041712_NAR_60mM_minus.15726.15726.3  | 3 | 5.84 | 0 | 3.64E+05 | (R)IYSHSL(R)R)S V/H S I L L P V L R(S)               | 14807 | 433.2572 | 1297.763 | -0.0056   | -4.4  | 8.75    | 60871.9  | 6.3   | HUMAN  | 84D193                         | Phosphoribosylformylglycinamide cyclase                                                        |
| 19748 | dirMS_041712_NAR_60mM_minus.18244.18244.3  | 3 | 5.84 | 0 | 9.48E+04 | (R)IYNSVY(R)R)N S/V S P M A I H S L E(R)C            | 1625  | 486.2409 | 1402.707 | -0.0008   | 0.6   | 6.75    | 267260.7 | 5.95  | HUMAN  | Q33083                         | Acetyl-CoA carboxylase 1                                                                       |
| 19749 | dirMS_041712_NAR_60mM_minus.7033.7033.3    | 3 | 5.84 | 1 | 2.68E+05 | (R)KVVPE(R)R)K V V E A/P D T S(R)R                   | 9745  | 400.8938 | 1200.658 | 0.0067    | 7.1   | 6.04    | 29315.9  | 5.48  | HUMAN  | E7E085                         | Filamin-B                                                                                      |
| 19750 | dirMS_041712_NAR_20mM_plus.12406.12406.3   | 3 | 5.84 | 0 | 5.11E+04 | (K)YVNGS(K)Q V N Q I G S V/T E I/Q A C(K)I           | 15902 | 545.2781 | 1633.821 | -0.0016   | -1    | 5.97    | 47328.4  | 7.76  | HUMAN  | PI3929                         | Beta-enolase                                                                                   |
| 19751 | dirMS_041712_NAR_20mM_plus.13058.13058.2   | 2 | 5.84 | 0 | 3.89E+04 | (R)ISPEE(K)N S I I P E E C V P R(R)                  | 16218 | 584.808  | 1168.621 | -0.0121   | -10.4 | 4.25    | 16905.1  | 4.27  | HUMAN  | F8V336                         | Natural resistance-associated macrophage protein 2 (Fragment)                                  |
| 19752 | dirMS_041712_NAR_20mM_plus.14244.14244.2   | 2 | 5.84 | 0 | 1.45E+05 | (R)ILAAQL(R)A/L Q/L E/V L S(K)I                      | 14047 | 486.789  | 972.572  | -0.0017   | -1.7  | 6.05    | 19798.9  | 10.17 | HUMAN  | PE6251                         | 40S ribosomal protein S25                                                                      |
| 19753 | dirMS_041712_NAR_20mM_plus.18321.18321.2   | 2 | 5.84 | 0 | 1.23E+05 | (R)KVVPE(R)R)K V V E A/P D T S(R)R                   | 9745  | 400.8938 | 1200.658 | 0.0067    | 7.1   | 6.04    | 29315.9  | 5.48  | HUMAN  | E7E085                         | Filamin-B                                                                                      |
| 19754 | dirMS_041712_NAR_20mM_plus.18703.18703.3   | 3 | 5.84 | 0 | 5.55E+04 | (R)KJADQ(K)K L D V A/V I T Y P P A R(D)              | 19883 | 514.9547 | 1542.853 | -0.0031   | -2    | 4.21    | 49883    | 7.3   | HUMAN  | PA9411                         | Elongation factor Tu, mitochondrial                                                            |
| 19755 | dirMS_041712_NAR_20mM_plus.6621.6636.2     | 2 | 5.84 | 0 | 2.29E+05 | (K)JALDE(K)A/L D I E/M E(K)K                         | 893   | 418.1994 | 835.387  | 0.0049    | 5.9   | 5.14    | 58856.7  | 6.26  | HUMAN  | Q8WFX1                         | Paraspeckle component 1                                                                        |
| 19756 | dirMS_041712_NAR_40mM_plus.12099.12099.3   | 3 | 5.84 | 1 | 6.59E+04 | (K)TSLVAT(K)T S A/V A T/P G I D K L E(K)S            | 13773 | 524.9653 | 1572.884 | -0.0003   | -1.9  | 5.73    | 89730.5  | 5.69  | HUMAN  | Q8V336                         | Protein HD1                                                                                    |
| 19757 | dirMS_041712_NAR_40mM_plus.14335.14335.3   | 3 | 5.84 | 1 | 6.62E+05 | (K)IASSVY(R)R)N S/V S P M A I H S L E(R)C            | 1625  | 486.2409 | 1402.707 | -0.0008   | 0.4   | 5.85    | 36796.8  | 5.95  | HUMAN  | EJ48A8                         | Enhancer of zinnia-escaping protein 4                                                          |
| 19758 | dirMS_041712_NAR_40mM_plus.8905.8905.2     | 2 | 5.84 | 0 | 1.05E+05 | (R)YFVGGK(R)F V V G D G V(K)K                        | 11503 | 474.7301 | 948.446  | 0.0068    | 7.1   | 5.83    | 97297    | 5.75  | HUMAN  | Q9H6C4                         | V-type proton ATPase 116 kDa subunit isoform 4                                                 |
| 19759 | dirMS_041712_NAR_40mM_plus.9791.9791.3     | 3 | 5.84 | 0 | 2.43E+05 | (R)JAAEDP(R)A A E/D I P V A A P P R L A G R(K)       | 12112 | 572.6438 | 1715.919 | -0.0019   | -1.1  | 6.12    | 73966.7  | 10.21 | HUMAN  | B3KW66                         | Alpha-L-sucuronidase                                                                           |
| 19760 | dirMS_041712_NAR_50mM_plus.10695.10695.3   | 3 | 5.84 | 1 | 1.94E+05 | (R)JAAVGR(R)A A/V I I/G P D V F A(K)I                | 12317 | 426.5574 | 1261.657 | 16.0007   | -4.6  | 8.69    | 61708.7  | 9.56  | HUMAN  | Q00027                         | 5.2 kDa protein ligase CBX4                                                                    |
| 19761 | dirMS_041712_NAR_50mM_plus.10750.10750.3   | 3 | 5.84 | 1 | 5.26E+05 | (R)JAAVGR(R)A A/V I I/G P D V F A(K)I                | 12317 | 426.5574 | 1261.657 | 16.0007   | 0.1   | 4.25    | 61336.9  | 9.56  | HUMAN  | Q00027                         | 5.2 kDa protein ligase CBX4                                                                    |
| 19762 | dirMS_041712_NAR_50mM_plus.12781.12781.3   | 3 | 5.84 | 0 | 1.24E+05 | (R)IYNSVY(R)R)N S/V S P M A I H S L E(R)C            | 1625  | 486.2409 | 1402.707 | -0.0008   | 0.1   | 4.25    | 61336.9  | 9.56  | HUMAN  | Q00027                         | 5.2 kDa protein ligase CBX4                                                                    |
| 19763 | dirMS_041712_NAR_50mM_plus.7532.7532.3     | 3 | 5.84 | 1 | 3.25E+05 | (R)IYEQDT(R)R)V E/Q I D T M P P K G V R(H)C          | 10545 | 490.5973 | 1469.778 | -0.0007   | -0.5  | 6.07    | 73386.6  | 8.73  | HUMAN  | B4DQX7                         | ATP-dependent RNA helicase DDX3Y                                                               |
| 19764 | dirMS_041712_NAR_120mM_minus.17879.17879.3 | 3 | 5.83 | 1 | 1.54E+05 | (R)JAGKLP(R)A G K L/D I P H L V L D L(Q)R            | 1517  | 525.6385 | 1574.901 | -0.0004   | -0.2  | 6.79    | 23493.8  | 5.45  | HUMAN  | F8V1L3                         | Mysin-10                                                                                       |
| 19765 | dirMS_041712_NAR_120mM_minus.19360.19360.3 | 3 | 5.83 | 1 | 3.72E+05 | (K)NLRD(K)N V A D V D V G S L L I(T)K                | 16142 | 510.614  | 1529.828 | -0.0007   | -0.5  | 4.56    | 58214.7  | 5.25  | HUMAN  | B4D6E7                         | T-complex protein 1 subunit theta                                                              |
| 19766 | dirMS_041712_NAR_120mM_minus.9311.9311.4   | 4 | 5.83 | 0 | 1.92E+05 | (R)ELALK(R)E L A/L V G I M D/P A E F E E(K)G         | 18958 | 520.0034 | 1684.999 | -0.003    | -4.6  | 4.18    | 25148.6  | 6     | HUMAN  | P30841                         | Perlecanin-6                                                                                   |
| 19767 | dirMS_041712_NAR_120mM_minus.9748.9748.2   | 2 | 5.83 | 1 | 9.73E+05 | (R)SISFAE(R)S R A E A E S V M Y L A(K)I              | 10727 | 706.8447 | 1412.684 | -0.0017   | -1.2  | 5.86    | 37296.3  | 5.3   | HUMAN  | F8V336                         | Keratin, type II cytoskeletal 8                                                                |
| 19768 | dirMS_041712_NAR_20mM_minus.12666.12666.2  | 2 | 5.83 | 0 | 1.62E+05 | (K)JALDE(K)A/L D I E/M E(K)K                         | 893   | 418.1994 | 835.387  | 0.0049    | 5.9   | 5.14    | 58856.7  | 6.26  | HUMAN  | Q8WFX1                         | Paraspeckle component 1                                                                        |
| 19769 | dirMS_041712_NAR_20mM_minus.13562.13582.2  | 2 | 5.83 | 0 | 1.43E+05 | (R)IQAEY(K)A/Q V Q E Y I E A L L N I(K)V             | 18685 | 710.3754 | 1419.748 | -0.0043   | -3    | 4.53    | 43773.3  | 5.26  | HUMAN  | F8V279                         | Keratin, type I cytoskeletal 18                                                                |
| 19770 | dirMS_041712_NAR_20mM_minus.9794.9794.2    | 2 | 5.83 | 1 | 1.62E+05 | (R)IYNSVY(R)R)N S/V S P M A I H S L E(R)C            | 1625  | 486.2409 | 1402.707 | -0.0008   | -9.5  | 6.4     | 45569.9  | 8.8   | HUMAN  | EJ48A8                         | Enhancer of zinnia-escaping protein 4                                                          |
| 19771 | dirMS_041712_NAR_30mM_minus.12681.12681.2  | 2 | 5.83 | 0 | 2.32E+05 | (R)ICQYDF(R)E C G I Y I F D E I E(N)K(R)I            | 12293 | 660.7538 | 1320.459 | 0.002     | 1.5   | 4.14    | 266161   | 5.68  | HUMAN  | E9PPU0                         | Epiplakin                                                                                      |
| 19772 | dirMS_041712_NAR_30mM_minus.10540.10540.3  | 3 | 5.83 | 1 | 2.76E+05 | (R)KQVAM(R)K Q I V A I M N P T V T D A R(K)I         | 128.5 | 602.6379 | 1805.896 | 0.0029    | 1.6   | 8.75    | 20069.4  | 6.74  | HUMAN  | E9PK54                         | Heat shock cognate 71 kDa protein (Fragment)                                                   |
| 19773 | dirMS_041712_NAR_50mM_minus.16388.16388.3  | 3 | 5.83 | 0 | 5.32E+04 | (K)ITTHG(K)T I I E/V N I Q L P H T L S R(F)          | 16112 | 579.326  | 1735.97  | -0.0027   | -3.8  | 6.41    | 95792.4  | 6.36  | HUMAN  | J3KPV4                         | DNA replication licensing factor MCM4                                                          |
| 19774 | dirMS_041712_NAR_50mM_minus.5844.5844.2    | 2 | 5.83 | 1 | 4.33E+04 | (R)JAAEAP(R)A I E A/P E I V D E I K R(K)R            | 9543  | 489.5922 | 1466.76  | 0.0023    | 1.5   | 4.79    | 15660.9  | 10.38 | HUMAN  | IL1149                         | FLW/HC family member 4                                                                         |
| 19775 | dirMS_041712_NAR_60mM_minus.1411.1411.1    | 1 |      |   |          |                                                      |       |          |          |           |       |         |          |       |        |                                |                                                                                                |

|       |                                            |   |      |                |                                                |          |          |          |         |      |         |          |       |       |               |                                                                                          |
|-------|--------------------------------------------|---|------|----------------|------------------------------------------------|----------|----------|----------|---------|------|---------|----------|-------|-------|---------------|------------------------------------------------------------------------------------------|
| 19834 | dirMS_041712_NAR_30mM_plus2.18566.18566.3  | 3 | 5.81 | 0.497E+05      | (R)SSFPV(R)S SVV Y N Q/L/T/L/G/G Q(K)          | 150.95   | 490.9251 | 1470.759 | 0.002   | 1.4  | 8.31    | 17630.6  | 11.62 | HUMAN | IL3L05        | Profilin-1 (Fragment)                                                                    |
| 19835 | dirMS_041712_NAR_30mM_plus2.2106.21106.2   | 2 | 5.81 | 0.377E+04      | (R)EMVLEI(R)E M/V/L/I/E I(R)                   | 164.45   | 501.7877 | 1002.565 | 0.0029  | 2.9  | 4.53    | 61981.6  | 8.97  | HUMAN | QBN24         | Upstream element-binding protein 3                                                       |
| 19836 | dirMS_041712_NAR_30mM_plus2.8079.8079.2    | 2 | 5.81 | 0.258E+05      | (R)ACTEGL(R)A C/T/E G/L/T                      | 117.07   | 468.0176 | 910.497  | 0.004   | 4.1  | 6.6     | 58266.6  | 6.46  | HUMAN | QBN24         | Pyruvate carboxylase, mitochondrial                                                      |
| 19837 | dirMS_041712_NAR_30mM_plus2.9986.9986.2    | 2 | 5.81 | 0.255E+05      | (R)EIMVLEI(R)E V/D Q V/Q P A(R)                | 105.78   | 635.3292 | 1269.643 | 0.0078  | 6.1  | 4.03    | 91388.8  | 5.78  | HUMAN | QBN24         | Neurulin-2                                                                               |
| 19838 | dirMS_041712_NAR_40mM_plus2.8215.8215.2    | 2 | 5.81 | 0.268E+03      | (K)NLNCSPP(K)N L/S/P/D S F(R)                  | 109.17   | 548.2538 | 1095.489 | 0.0116  | 10.5 | 5.84    | 141616.6 | 6.1   | HUMAN | B72M8         | Protein transport protein Sec24B                                                         |
| 19839 | dirMS_041712_NAR_40mM_plus2.19882.19882.3  | 3 | 5.81 | 0.526E+04      | (K)IGLCLLE(K)G L/U C/L E Q I D S F/K P P Q(R)  | 172.9    | 634.3344 | 1900.995 | -0.0063 | -3.3 | 6.07    | 45366.8  | 9.03  | HUMAN | B72K1         | HBS1-like protein                                                                        |
| 19840 | dirMS_041712_NAR_50mM_plus2.8561.8561.3    | 3 | 5.81 | 0.236E+05      | (R)IVSPPK(R)I V/V P E G N T Q/V T F A W N K(R) | 117.58   | 643.2064 | 1222.600 | -0.004  | -1.1 | 8.59    | 31551.1  | 6.33  | HUMAN | FBV27         | Protein-transport-associated protein 264                                                 |
| 19841 | dirMS_041712_NAR_60mM_plus.19186.19186.3   | 3 | 5.81 | 0.130E+05      | (R)SLVKKP(K)S L L/K P F C A A/L/L K(H)         | 158.03   | 454.2724 | 1360.802 | 0.0005  | 0.4  | 10      | 227202.2 | 8.26  | HUMAN | Q14008        | Cytoskeleton-associated protein 5                                                        |
| 19842 | dirMS_041712_NAR_60mM_plus.19299.19299.3   | 3 | 5.81 | 1.522E+05      | (R)RTREGL(R)R T E I/G F L L A A/P/R(K)         | 159.48   | 439.262  | 1315.773 | -0.0018 | -1.4 | 8.41    | 62195.8  | 5.63  | HUMAN | BDYH6         | Arclin 1, isoform CRA_a                                                                  |
| 19843 | dirMS_041712_NAR_60mM_plus.21135.21135.3   | 3 | 5.81 | 1.316E+04      | (K)IKLFAEL(K)K E E A L E I/P/L P M A I(R)      | 173.85   | 574.9975 | 1722.982 | -0.0043 | -2.5 | 4.79    | 56164.6  | 6.01  | HUMAN | EP973         | Cotamer subunit beta (Fragment)                                                          |
| 19844 | dirMS_041712_NAR_120mM_minus.10372.10372.3 | 3 | 5.8  | 1.400E+04 M18m | 109.95                                         | 423.5471 | 1252.635 | -15.913  | -12.8   | 5.96 | 35566.4 | 9.3      | HUMAN | Z2238 | Transaldolase |                                                                                          |
| 19845 | dirMS_041712_NAR_20mM_minus.14511.14511.2  | 2 | 5.8  | 0.297E+04      | (R)SLVLEK(R)S V E I/V A G V/V G E I E Q E(K)   | 199.53   | 942.96   | 1884.99  | -0.006  | -4.5 | 4.09    | 2696.9   | 6.46  | HUMAN | EP910         | Euplokin                                                                                 |
| 19846 | dirMS_041712_NAR_20mM_minus.7542.7542.3    | 3 | 5.8  | 0.844E+05 M23m | (K)VEVDE(K)E V D E G/M/L/V G A N(K)            | 123.83   | 488.2327 | 1446.689 | 15.9942 | 10.5 | 4.14    | 40069.4  | 4.83  | HUMAN | FEVW1         | Tubulin beta chain                                                                       |
| 19847 | dirMS_041712_NAR_20mM_minus.9674.9674.2    | 2 | 5.8  | 0.126E+05      | (R)JAGTGV(R)A G/T G V/D N/V/D L A A T(R)       | 146.77   | 744.8662 | 1488.729 | -0.0038 | -2.5 | 4.03    | 57391.2  | 6.29  | HUMAN | DA3175        | D-3-phosphoglycerate dehydrogenase                                                       |
| 19848 | dirMS_041712_NAR_30mM_minus.11339.11339.2  | 2 | 5.8  | 0.140E+05      | (R)IAATPSA(R)A A/T S/P/LA L F(R)               | 115.4    | 524.2789 | 1047.558 | -0.0076 | -7.3 | 9.79    | 531336.6 | 6.01  | HUMAN | Q12404        | Cytoplasmic dynein 1 heavy chain 1                                                       |
| 19849 | dirMS_041712_NAR_30mM_minus.17991.17992.2  | 2 | 5.8  | 1.545E+05      | (K)KPTL(K)K P/R T A Q T A F E(K)               | 152.37   | 627.363  | 1251.721 | -0.0027 | -2.1 | 8.75    | 93078.6  | 9.36  | HUMAN | ANJ29         | Nuclear complex protein 3 homolog                                                        |
| 19850 | dirMS_041712_NAR_30mM_plus.6472.6472.2     | 2 | 5.8  | 0.191E+04      | (K)EVDI(K)E V/E/D E/Y K(A)                     | 84.88    | 520.7257 | 1040.442 | 0.0032  | 2.3  | 9.31    | 92752.5  | 4.76  | HUMAN | PL4265        | Endoplasmic                                                                              |
| 19851 | dirMS_041712_NAR_30mM_minus.9716.9759.2    | 2 | 5.8  | 0.435E+05      | (K)ITTFDQ(K)T T I/T F/D A(K)                   | 107.35   | 448.7371 | 896.472  | -0.0055 | -6.1 | 5.5     | 18139.1  | 5.71  | HUMAN | B7W03         | Transcription elongation factor B (GII), polypeptide 2 (18kDa, elongin B), isoform CRA_a |
| 19852 | dirMS_041712_NAR_40mM_minus.12631.12631.3  | 3 | 5.8  | 1.155E+04      | (K)KALIQD(K)K L L Q D K V/V/A I Q D P L G(K)   | 157.85   | 651.0317 | 1195.086 | -0.0033 | -2.7 | 4.43    | 49507.6  | 5.35  | HUMAN | PO6280        | Alpha-galactosidase A                                                                    |
| 19853 | dirMS_041712_NAR_50mM_minus.13362.13362.3  | 3 | 5.8  | 1.180E+05 M26m | (K)GAEEM(K)E A I E I/M/V T V/P V/D M R R(R)    | 143.85   | 616.6435 | 1831.204 | 16.0119 | 9.2  | 4.41    | 16880.7  | 7.92  | HUMAN | K7L1W0        | Protein Dis-1                                                                            |
| 19854 | dirMS_041712_NAR_60mM_plus.8595.8595.3     | 3 | 5.8  | 0.913E+04      | (R)ISVYRN(R)S V Y V Y N G A S S H(Y)           | 107.72   | 466.5604 | 1397.67  | -0.0029 | -2.1 | 6.75    | 18402.2  | 5.06  | HUMAN | GV326         | HCG198350A, isoform CRA_d                                                                |
| 19855 | dirMS_041712_NAR_120mM_plus.18000.18000.3  | 3 | 5.8  | 0.473E+05      | (R)RHLLQAP(R) L L Q/A P V D/D A E/E/L H S(F)   | 148.32   | 648.0088 | 1942.014 | -0.0023 | -1.2 | 5.21    | 63613.4  | 7.9   | HUMAN | B3K01         | Protein transport protein Sec23A                                                         |
| 19856 | dirMS_041712_NAR_20mM_plus.15441.15441.2   | 2 | 5.8  | 0.272E+04      | (R)IAVNL(R)I A V/V N/L P C Q V D R(A)          | 178.62   | 734.3735 | 1447.736 | 0.0035  | 2.4  | 5.88    | 83880.6  | 7.33  | HUMAN | F5H365        | Protein transport protein Sec23A                                                         |
| 19857 | dirMS_041712_NAR_20mM_plus.16809.16809.2   | 2 | 5.8  | 0.306E+05      | (K)KNDQ(K)K S N Q Q/L/V/D I E I(V)             | 141.15   | 643.8004 | 1286.695 | -0.0015 | -1.2 | 4.37    | 22588.6  | 6.05  | HUMAN | BK3025        | Proteasome activator complex subunit 3                                                   |
| 19858 | dirMS_041712_NAR_30mM_plus.18077.18077.2   | 2 | 5.8  | 0.271E+05      | (R)IQITQI(R)Q/I/T Q/L M Q(K)                   | 114.52   | 568.8061 | 1136.613 | -0.0033 | -7.3 | 8.75    | 87373.5  | 5.24  | HUMAN | APJ14         | Splicing factor 3B subunit 1                                                             |
| 19859 | dirMS_041712_NAR_30mM_plus.19741.19741.2   | 2 | 5.8  | 0.355E+05      | (K)SIVNEN(K)S N/V/V E M D/W/L K(H)             | 156.9    | 667.8205 | 1334.641 | -0.0027 | -5.4 | 4.37    | 18511.8  | 5.62  | HUMAN | DR670         | Heterogeneous nuclear ribonucleoprotein H (Fragment)                                     |
| 19860 | dirMS_041712_NAR_30mM_plus.20190.20190.2   | 2 | 5.8  | 0.153E+05      | (K)NIGLDN(K)I V L G L D W/L(K)                 | 159.97   | 529.3028 | 1057.604 | -0.0057 | -5.4 | 5.84    | 41803.7  | 9.36  | HUMAN | BK3F0         | SEC14-like 4 (S. cerevisiae), isoform CRA_b                                              |
| 19861 | dirMS_041712_NAR_30mM_plus.20508.20508.2   | 2 | 5.8  | 0.280E+04      | (K)IAVMA(K)K A I/V N/M I/P F P(R)              | 161      | 572.32   | 1143.634 | -0.0016 | -1.4 | 9.75    | 42330.8  | 4.77  | HUMAN | AN828         | Puative tubulin beta chain-like protein ENSP0000290377                                   |
| 19862 | dirMS_041712_NAR_30mM_plus.2497.2497.2     | 2 | 5.8  | 0.710E+05      | (K)KLVV(K)K V L V/V D H S I/E T I(R)           | 104.4    | 491.75   | 988.49   | -0.0046 | -4.6 | 6.25    | 24071.9  | 5.43  | HUMAN | EP925         | 40S ribosomal protein L4                                                                 |
| 19863 | dirMS_041712_NAR_40mM_plus.2646.2646.2     | 2 | 5.8  | 0.118E+05      | (K)QYDVR(K)Y Q/V I/V(R)                        | 98.15    | 415.927  | 838.424  | -0.0009 | -1   | 8.75    | 31471.1  | 10.11 | HUMAN | MS565         | G0S2 ribosomal protein L3 (Fragment)                                                     |
| 19864 | dirMS_041712_NAR_40mM_plus.2754.7754.2     | 2 | 5.8  | 0.423E+04      | (R)IVLNTN(R)I/V N T N D G(R)                   | 105.73   | 517.109  | 1001.537 | -0.0009 | -0.9 | 5.81    | 17718.4  | 10.99 | HUMAN | PE269         | 40S ribosomal protein S18                                                                |
| 19865 | dirMS_041712_NAR_50mM_plus.20182.20182.3   | 3 | 5.8  | 1.144E+05      | (R)FIFVPM(R)F I I/V P/L N G L E K E(K)         | 174.58   | 457.6182 | 1370.841 | -0.0006 | -0.4 | 8.59    | 142001.7 | 5.82  | HUMAN | QD279         | Sympkin                                                                                  |
| 19866 | dirMS_041712_NAR_50mM_plus.20603.20603.3   | 3 | 5.8  | 1.256E+05      | (R)GPNPVR(R)G P N/V P/L A L A/D V P V P(R)     | 177      | 422.3526 | 919.471  | -0.0006 | -3.1 | 5.75    | 31849.6  | 6.73  | HUMAN | Q7U196        | Casoin fibronectin II subunit alpha                                                      |
| 19867 | dirMS_041712_NAR_60mM_plus.10542.10542.2   | 2 | 5.8  | 1.163E+06      | (R)IVKYTEI(R)K V I/Y E T E/L A M R(K)          | 113.12   | 620.326  | 1239.64  | 0.0045  | 3.7  | 6.11    | 43773.3  | 5.26  | HUMAN | FBV29         | Keratin, type I cytoskeletal 18                                                          |
| 19868 | dirMS_041712_NAR_60mM_plus.17163.17163.3   | 3 | 5.8  | 1.291E+05      | (R)ISLUSI(R)S I/S A V S D K R(W)               | 146.83   | 420.5832 | 1259.732 | 0.0033  | 2.6  | 8.79    | 41088.1  | 5.18  | HUMAN | F5H442        | Tumor susceptibility gene 101 protein                                                    |
| 19869 | dirMS_041712_NAR_60mM_plus.20962.20962.3   | 3 | 5.8  | 0.386E+05      | (R)SHDAIL(R)H D A L D C/V/L A Q/T Q(K)         | 171.88   | 518.9515 | 1554.831 | 0.0094  | 6.1  | 6.46    | 57204.9  | 6.01  | HUMAN | FGW6F         | T-complex protein 1 subunit beta                                                         |
| 19870 | dirMS_041712_NAR_120mM_minus.13731.13731.3 | 3 | 5.79 | 0.439E+04      | (R)IFGESSI(R)G P C G S S H C D P I(R)          | 129.23   | 526.5672 | 1577.884 | 0.0035  | 2.2  | 5.32    | 30197.4  | 7.91  | HUMAN | EP9M62        | Palmitoyl-protein thioesterase 1 (Fragment)                                              |
| 19871 | dirMS_041712_NAR_120mM_minus.16684.16684.2 | 2 | 5.79 | 0.630E+05      | (R)HLEK(R)K L V/E V P H S I/E T I(R)           | 146.28   | 447.4904 | 1786.545 | -0.0049 | -2.7 | 5.27    | 85957.6  | 4.94  | HUMAN | RT909         | Heat shock protein HSP 90-alpha                                                          |
| 19872 | dirMS_041712_NAR_120mM_minus.8221.8221.2   | 2 | 5.79 | 0.437E+05      | (R)HGGVM(R)I Q I/G M V/M G Q/K(D)              | 90.093   | 586.2907 | 1171.571 | 0.0031  | 2.6  | 8.76    | 32616.5  | 5.18  | HUMAN | AN6176        | Actin, alpha skeletal muscle                                                             |
| 19873 | dirMS_041712_NAR_30mM_minus.11084.11084.2  | 2 | 5.79 | 0.409E+05      | (R)YFSSTTR(R)Y I S F/T/T A E R(E)              | 114.07   | 566.7999 | 1132.527 | 0.0056  | 4.9  | 6       | 23901.9  | 5.28  | HUMAN | IL3L19        | Actin, cytoplasmic 2, N-terminally processed (Fragment)                                  |
| 19874 | dirMS_041712_NAR_30mM_minus.18167.18167.2  | 2 | 5.79 | 0.292E+04      | (R)NLVGLR(K)I L M/L U/G E S I R(K)             | 153.3    | 557.3333 | 1113.663 | -0.0033 | -3   | 6       | 119157.2 | 5.4   | HUMAN | BL0083        | HLA-B associated transcript 3                                                            |
| 19875 | dirMS_041712_NAR_30mM_minus.6200.6200.2    | 2 | 5.79 | 0.532E+05      | (R)GKVV(R)G V I D I/P A F E(K)                 | 87.56    | 525.618  | 1100.613 | -0.0031 | -1.7 | 5.72    | 31240.4  | 6.46  | HUMAN | Q12402        | Mortality factor 4-like protein 2                                                        |
| 19876 | dirMS_041712_NAR_30mM_plus.16666.16666.3   | 3 | 5.79 | 0.127E+05      | (K)YSVHLK(K)S V L L G I N V/D T F T(R)         | 162.28   | 524.6237 | 1571.854 | 0.0025  | 1.6  | 6.71    | 227783.5 | 5.5   | HUMAN | B3U395        | Myosin-9                                                                                 |
| 19877 | dirMS_041712_NAR_60mM_minus.18694.18694.3  | 3 | 5.79 | 1.951E+04      | (R)YFELDR(R)Y E F/L D K L I V V R(K)           | 165.37   | 499.6723 | 1495.815 | -0.0012 | -0.8 | 4.56    | 41296.9  | 9.52  | HUMAN | BDY72         | 26S proteasome non-ATPase regulatory subunit 3                                           |
| 19878 | dirMS_041712_NAR_60mM_minus.6297.6297.3    | 3 | 5.79 | 1.103E+04      | (R)IKTKEI(R)R K T Y E I/S I E M R(N)           | 93.73    | 470.5374 | 1208.594 | 0.0037  | 3    | 5.81    | 37296.3  | 5.3   | HUMAN | FBVU64        | Keratin, type II cytoskeletal 8                                                          |
| 19879 | dirMS_041712_NAR_60mM_minus.9687.9687.3    | 3 | 5.79 | 1.233E+05      | (R)ISPTMA(R)P T/M A G C L F D S R(K)           | 114.3    | 465.2487 | 1303.751 | -0.0017 | -1.8 | 10      | 63035.7  | 7.33  | HUMAN | FBVU19        | Protein PC13-GALNT1                                                                      |
| 19880 | dirMS_041712_NAR_120mM_plus.10580.10580.3  | 3 | 5.79 | 1.121E+06      | (R)IKLEME(R)E V/L E M E I M A/S A(R)           | 109.52   | 446.2171 | 1336.623 | 0.0133  | 9.0  | 4.49    | 29678.2  | 9.57  | HUMAN | CV358         | Non-PQI domain-containing octamer-binding protein (Fragment)                             |
| 19881 | dirMS_041712_NAR_120mM_plus.14254.14254.3  | 3 | 5.79 | 1.266E+04 M31m | (R)RTVQSI(R)R V T Q S L E I/D D V S R(N)       | 127.45   | 560.2841 | 1662.848 | 15.9882 | -3   | 4.56    | 43773.3  | 5.26  | HUMAN | FBV29         | Keratin, type I cytoskeletal 18                                                          |
| 19882 | dirMS_041712_NAR_120mM_plus.7985.7985.2    | 2 | 5.79 | 0.142E+06      | (R)HGGVM(R)I Q I/G M V/M G Q/K(D)              | 90.13    | 586.2888 | 1171.571 | -0.0007 | -0.6 | 8.76    | 32616.5  | 5.18  | HUMAN | AN6176        | Actin, alpha skeletal muscle                                                             |
| 19883 | dirMS_041712_NAR_120mM_plus.9205.9205.3    | 3 | 5.79 | 2.366E+05 M49m | (R)IKTKEE(R)R T I/R K E E A E A E G(K)         | 101.48   | 542.34   | 1010.809 | 15.9967 | 0.7  | 4.94    | 11337.8  | 9.3   | HUMAN | AP9W80        | Elongation factor alpha 1 (Fragment)                                                     |
| 19884 | dirMS_041712_NAR_20mM_plus.16908.16908.2   | 2 | 5.79 | 0.176E+05      | (R)IFGESSI(R)G P C G S S H C D P I(R)          | 129.23   | 526.5672 | 1577.884 | 0.0035  | 2.2  | 5.32    | 30197.4  | 7.91  | HUMAN | EP9M62        | Palmitoyl-protein thioesterase 1 (Fragment)                                              |
| 19885 | dirMS_041712_NAR_20mM_plus.8678.8678.2     | 2 | 5.79 | 0.106E+05      | (K)IEQVANS(K)Q I/V N S F A F V E R(K)          | 130.53   | 625.3102 | 1249.617 | -0.004  | -3.2 | 4.53    | 17664    | 8.77  | HUMAN | HOY64         | Heat shock protein HSP 90-beta (Fragment)                                                |
| 19886 |                                            |   |      |                |                                                |          |          |          |         |      |         |          |       |       |               |                                                                                          |





|       |                                            |   |      |   |          |       |                                                 |        |                    |          |          |          |          |          |         |        |                                                  |                                                                  |                                  |
|-------|--------------------------------------------|---|------|---|----------|-------|-------------------------------------------------|--------|--------------------|----------|----------|----------|----------|----------|---------|--------|--------------------------------------------------|------------------------------------------------------------------|----------------------------------|
| 20161 | dirMS_041712_NAR_40nm_plus2.12032.12032.3  | 3 | 5.66 | 1 | 9.18E+04 | S1895 | (K)ITAKV(K)K(T A/V K/V (P/Q S P K)T)            | 4      | sPhosphorylation 5 | 137.3    | 424.5414 | 1191.637 | 5.1      | 9.7      | 68204.5 | 11.88  | HUMAN                                            | FGSVC2                                                           | MAP7 domain-containing protein 2 |
| 20162 | dirMS_041712_NAR_40nm_plus2.15968.15968.2  | 2 | 5.66 | 0 | 8.37E+04 |       | (K)ITLVTA(V)R(I/V LTV/A A V F R)G)              | 161.67 | 520.2977           | 1039.959 | -0.014   | -1.3     | 8.75     | 40069.4  | 4.84    | HUMAN  | ETWVR1                                           | Tubulin beta chain                                               |                                  |
| 20163 | dirMS_041712_NAR_40nm_plus2.17404.2        | 0 | 5.66 | 0 | 1.02E+05 |       | (K)ISDFD(S)G(I Y F F R)G)                       | 102.75 | 2276.175           | 971.67   | 0.002    | 0.2      | 2276.175 | 971.67   | 2019    | CREBBP | Creative kinase U-type, mitochondrial (Fragment) |                                                                  |                                  |
| 20164 | dirMS_041712_NAR_40nm_plus2.9592.9592.2    | 2 | 5.66 | 0 | 8.12E+04 |       | (K)ISDFG(K)K(N T F/E/G T R)D)                   | 120.5  | 421.719            | 842.415  | 0.001    | -1.2     | 9.41     | 24897.7  | 9.84    | HUMAN  | ABMTM1                                           | Cubilin receptor [NADPH] 1                                       |                                  |
| 20165 | dirMS_041712_NAR_50nm_plus2.11633.11633.3  | 3 | 5.66 | 0 | 1.58E+05 |       | (R)IINDLR(R)N(LD/V)R(P T Y T L N L R)I)         | 130.17 | 573.614            | 1718.882 | -0.0024  | -1.4     | 6.07     | 49012.3  | 4.9     | HUMAN  | ABMU15                                           | Tubulin alpha-4A chain                                           |                                  |
| 20166 | dirMS_041712_NAR_50nm_plus2.12323.12323.3  | 3 | 5.66 | 0 | 2.15E+06 |       | (R)ISCTWR(R)S(C/T/N)I(N M F/G P T Q R)N)        | 138.4  | 592.9438           | 1776.816 | 0.012    | -0.7     | 6.47     | 65763.5  | 9.81    | HUMAN  | QNH0CS                                           | Nuclear receptor coactivator 5                                   |                                  |
| 20167 | dirMS_041712_NAR_50nm_plus2.13513.13513.3  | 3 | 5.66 | 0 | 1.11E+06 | M185m | (R)IRPHD(R)I(V)Y(F P D R)K(P S A V R)D)         | 138.13 | 511.3256           | 1612.265 | 2.01107  | 15.9     | 8.5      | 29316.1  | 5.56    | HUMAN  | QNRK1                                            | Matrix metalloproteinase 26                                      |                                  |
| 20168 | dirMS_041712_NAR_50nm_plus2.6070.6070.3    | 3 | 5.66 | 0 | 3.37E+04 |       | (K)IQDQK(K)K(Q)G(K P G S/LD)W(S Q)K)C)          | 96.05  | 530.5884           | 1589.759 | -0.0081  | -5.1     | 6.07     | 9122.2   | 9.22    | HUMAN  | K7E1T2                                           | Mitochondrial import inner membrane translocase subunit Tim13    |                                  |
| 20169 | dirMS_041712_NAR_50nm_plus2.7013.7013.3    | 3 | 5.66 | 0 | 8.91E+04 |       | (K)ISPSV(K)K(S P S V K/P A/V P A A K)I)         | 102.45 | 475.5987           | 1424.774 | 0.0072   | 2.5      | 8.31     | 26321.7  | 6.24    | HUMAN  | HBSPG7                                           | Amorasin                                                         |                                  |
| 20170 | dirMS_041712_NAR_60nm_plus2.9686.9686.3    | 3 | 5.66 | 1 | 5.14E+04 |       | (K)IKQELP(K)K(K)E(V)I/L P E E R)K)              | 102.73 | 418.9051           | 1254.705 | -0.0045  | -3.6     | 4.79     | 91344.6  | 6.07    | HUMAN  | EPNG20                                           | Cold shock domain-containing protein E1                          |                                  |
| 20171 | dirMS_041712_NAR_60nm_plus2.9743.9743.3    | 3 | 5.66 | 0 | 1.33E+06 |       | (K)IKWVAK(K)I(V)N A N G E A Y C R)F)            | 109.38 | 446.56             | 1337.652 | 0.0136   | -10.2    | 6        | 59983.3  | 6.5     | HUMAN  | PR0404                                           | Catalase                                                         |                                  |
| 20172 | dirMS_041712_NAR_120nm_minus.13767.13767.4 | 4 | 5.65 | 1 | 1.40E+05 |       | (K)IKASNA(K)K(M)E A W T E E K A M L K)H)        | 129.97 | 447.48             | 1786.879 | -0.004   | 1.6      | 5.45     | 22854.2  | 4.04    | HUMAN  | AB04                                             | Alpha actinin 4 short isoform                                    |                                  |
| 20173 | dirMS_041712_NAR_20nm_minus.14644.14644.2  | 2 | 5.65 | 0 | 2.02E+05 |       | (K)ITAYET(K)A(V)E/V E A V(L)U L R)I)            | 201.2  | 593.3613           | 1185.72  | -0.0048  | -4.1     | 5.66     | 56186.7  | 5.47    | HUMAN  | BD4UR8                                           | T-complex protein 1 subunit gamma                                |                                  |
| 20174 | dirMS_041712_NAR_30nm_minus.16638.16638.2  | 2 | 5.65 | 0 | 1.61E+05 |       | (R)INPSA(R)N(S)A A F F C V A R)I)               | 144.1  | 620.3013           | 1239.594 | 0.0014   | 1.1      | 9.75     | 18626.5  | 5.64    | HUMAN  | IB8ZC2                                           | Gamma-glutamylcystoatransferase                                  |                                  |
| 20175 | dirMS_041712_NAR_30nm_minus.18146.18146.2  | 2 | 5.65 | 0 | 2.92E+04 |       | (R)IUNVGE(R)I(N)I(L)G(S E V)R)I)                | 95.57  | 537.3333           | 1111.663 | -0.0033  | -3       | 6        | 119457.2 | 5.4     | HUMAN  | IBU0B3                                           | HLA-B associated transcript 3                                    |                                  |
| 20176 | dirMS_041712_NAR_30nm_minus.4632.4632.2    | 2 | 5.65 | 0 | 7.57E+05 |       | (K)IQASG(K)K(Q)A(S E P L)K)G)                   | 76.43  | 415.2122           | 820.441  | -0.0017  | -2       | 6        | 31718.5  | 7.17    | HUMAN  | ETL7L4                                           | Glycerol-3-phosphate-3-oxoacyl-CoA dehydrogenase                 |                                  |
| 20177 | dirMS_041712_NAR_30nm_minus.8119.8119.2    | 2 | 5.65 | 0 | 2.20E+05 |       | (K)ISFOSSO(K)S(F)Q(S)S(L S R)K)                 | 193.8  | 520.2591           | 1039.517 | -0.0058  | -5.6     | 9.47     | 100478.9 | 5.71    | HUMAN  | ABMXP9                                           | Matrin-3                                                         |                                  |
| 20178 | dirMS_041712_NAR_30nm_minus.8371.8371.2    | 2 | 5.65 | 0 | 4.91E+05 |       | (K)ISFOSSO(K)S(F)Q(S)S(L S R)K)                 | 1004.3 | 520.2591           | 1039.517 | -0.0058  | -5.6     | 9.47     | 100478.9 | 5.71    | HUMAN  | ABMXP9                                           | Matrin-3                                                         |                                  |
| 20179 | dirMS_041712_NAR_50nm_minus.20662.20662.3  | 3 | 5.65 | 1 | 3.06E+04 |       | (R)IAEFTT(R)I)A(E)F T T L M T E E E K S)K)      | 128.63 | 623.6418           | 1868.912 | -0.0015  | -4.8     | 4.32     | 22783.5  | 5.5     | HUMAN  | P53579                                           | Myosin-9                                                         |                                  |
| 20180 | dirMS_041712_NAR_50nm_minus.6714.6714.3    | 3 | 5.65 | 1 | 8.76E+04 | M22m  | (K)IKLQAG(K)I(L)A(G)E A R E Y D D)M A C M)K)    | 108.8  | 645.2741           | 1901.819 | 3.15897  | 0.6      | 4.32     | 5019.6   | 4.73    | HUMAN  | ES6E61                                           | 14-3-3 protein zeta/delta (Fragment)                             |                                  |
| 20181 | dirMS_041712_NAR_50nm_minus.6907.6907.3    | 3 | 5.65 | 1 | 6.78E+04 |       | (R)ITESTP(R)I(T)E S T P T T A V Q V P E)K)      | 105.98 | 510.2775           | 1528.822 | -0.0038  | -2.6     | 5.81     | 99028.8  | 5.32    | HUMAN  | OY9F78                                           | Coatomer subunit gamma-1                                         |                                  |
| 20182 | dirMS_041712_NAR_60nm_minus.13939.13939.3  | 3 | 5.65 | 0 | 3.54E+05 |       | (K)IHLGTT(K)H(L)G T T Q N N(L)T/V E A D F)R)    | 137.45 | 601.6438           | 1802.903 | 0.0137   | 7.6      | 5.32     | 49472.3  | 6.3     | HUMAN  | OY7551                                           | Vacuolar protein sorting-associated protein 4B                   |                                  |
| 20183 | dirMS_041712_NAR_60nm_minus.18916.18916.3  | 3 | 5.65 | 0 | 2.34E+05 |       | (K)ICRPDL(R)R(R)V DQ L T G/L S L P/L S)E)K)     | 167.98 | 643.0129           | 1927.032 | -0.0076  | -3.9     | 6.07     | 533778   | 5.74    | HUMAN  | OY1549                                           | Plectin                                                          |                                  |
| 20184 | dirMS_041712_NAR_60nm_minus.8845.8845.3    | 3 | 5.65 | 1 | 2.18E+05 |       | (K)IQIDRR(K)K(D)N P K D P G S E)E)I)            | 96.37  | 463.2294           | 1367.67  | 0.0037   | 2.7      | 4.7      | 39982    | 5.86    | HUMAN  | BD4D8                                            | T-complex protein 1 subunit epsilon                              |                                  |
| 20185 | dirMS_041712_NAR_60nm_minus.8920.8920.3    | 3 | 5.65 | 0 | 3.02E+05 |       | (K)IEFHLN(E)K(F)H L N E S/G(S P S)K)            | 108.08 | 482.8882           | 1446.65  | 0.0025   | -0.3     | 4.65     | 30992.3  | 4.14    | HUMAN  | BZ8E8E                                           | Protein SET                                                      |                                  |
| 20186 | dirMS_041712_NAR_60nm_minus.9300.9300.3    | 3 | 5.65 | 0 | 2.51E+05 |       | (K)IQADNP(K)K(A)D)N P H V A/L Q A R)I)          | 111.68 | 494.9197           | 1482.745 | -0.0003  | -0.2     | 6.74     | 63098.1  | 7.83    | HUMAN  | B73099                                           | Hyoxia up-regulated protein 1                                    |                                  |
| 20187 | dirMS_041712_NAR_20nm_plus.15740.15740.2   | 2 | 5.65 | 0 | 4.98E+03 |       | (R)ISFVYV(R)S(F)Y/N G/L T G L G C Q)R)          | 180.83 | 735.8818           | 1470.759 | -0.0024  | -1.6     | 8.31     | 17630.6  | 11.62   | HUMAN  | IL3D05                                           | Profilin-1 (Fragment)                                            |                                  |
| 20188 | dirMS_041712_NAR_20nm_plus.7723.7723.2     | 2 | 5.65 | 0 | 4.28E+04 |       | (K)IAVTEQ(K)A(V)T E G G S A E L)S)E R)N)        | 122.33 | 766.8616           | 1532.719 | -0.0219  | -1.8     | 4.09     | 17219.2  | 5.69    | HUMAN  | EPNG15                                           | 14-3-3 protein theta (Fragment)                                  |                                  |
| 20189 | dirMS_041712_NAR_30nm_minus.18589.18589.3  | 3 | 5.65 | 0 | 1.62E+05 |       | (K)IQVYV(K)K(I)G L V T G L T T R)K)             | 150.37 | 571.8617           | 1512.721 | -0.0027  | -1.3     | 6.13     | 618.3    | 6.83    | HUMAN  | QNRK1                                            | Prolyl-4-hydroxylase beta chain, mitochondrial                   |                                  |
| 20190 | dirMS_041712_NAR_30nm_plus2.20570.20570.2  | 2 | 5.65 | 0 | 2.16E+04 |       | (K)IKALVAG(K)K(L)A(V)G(G L S)A)K)               | 161.85 | 563.8448           | 1126.694 | -0.0118  | -10.6    | 9.79     | 16940.9  | 6.15    | HUMAN  | QNRK5                                            | Actin-related protein 2/3 complex subunit 5-like protein         |                                  |
| 20191 | dirMS_041712_NAR_30nm_plus2.7078.7078.2    | 2 | 5.65 | 0 | 2.58E+05 |       | (K)IKMAQF(K)K(M)A(Q)D F A)K)                    | 91.35  | 405.6961           | 810.381  | 0.0035   | 4.3      | 5.59     | 56491.1  | 7.78    | HUMAN  | BD4D2G                                           | Elongation factor I-gamma                                        |                                  |
| 20192 | dirMS_041712_NAR_40nm_plus2.13581.13581.3  | 3 | 5.65 | 1 | 1.31E+04 |       | (K)IKDMLP(K)K(M)E I)P P T E E V A L V)K)        | 146.4  | 534.6192           | 1601.845 | -0.0024  | -1.5     | 4.41     | 85679.3  | 7.65    | HUMAN  | BZ9V7R                                           | Microtubule-associated protein                                   |                                  |
| 20193 | dirMS_041712_NAR_40nm_plus2.14357.14357.3  | 3 | 5.65 | 1 | 1.77E+05 |       | (K)IKMASSE(R)K(S)P D M P D)S A L K)M)           | 132.65 | 495.9975           | 1490.947 | -0.0037  | 0.4      | 5.96     | 36284.8  | 6.24    | HUMAN  | BD4D5E                                           | Pyruvate carboxylase                                             |                                  |
| 20194 | dirMS_041712_NAR_40nm_plus2.15010.15010.3  | 3 | 5.65 | 0 | 2.95E+04 |       | (K)IKYMLA(K)K(V)M)A)N)S)P S M E D)I V)K)S)      | 105.55 | 584.6129           | 1751.816 | 0.0076   | 4.4      | 5.32     | 76236.6  | 8.48    | HUMAN  | FSH1H2                                           | Cell cycle division and apoptosis regulator protein 1 (Fragment) |                                  |
| 20195 | dirMS_041712_NAR_40nm_plus2.15189.15189.3  | 3 | 5.65 | 0 | 1.01E+05 |       | (R)ITMGLS(R)E)I)T M L G D V A)P H P)D)K)        | 156.27 | 527.286            | 1579.851 | -0.0078  | -4.9     | 5.32     | 141718.6 | 7.8     | HUMAN  | BOV043                                           | Valine-tRNA ligase                                               |                                  |
| 20196 | dirMS_041712_NAR_50nm_plus2.10707.10707.3  | 3 | 5.65 | 0 | 4.45E+05 |       | (K)IKMIVP(K)M(I)D P V E P H G E M)K)F)          | 123.4  | 494.8753           | 1481.713 | 0.0076   | 5.2      | 4.65     | 90316.8  | 5.52    | HUMAN  | Q13263                                           | Transcription intermediary factor 1-beta                         |                                  |
| 20197 | dirMS_041712_NAR_50nm_plus2.11353.11353.3  | 3 | 5.65 | 2 | 1.17E+06 | S75   | (K)IKRINV(K)K(R)I(N)I(L)S)K)R)                  | 129.95 | 492.6609           | 1272.763 | 20.0447  | -24.8    | 9.99     | 17255.7  | 9.64    | HUMAN  | B7286                                            | T-cell receptor delta chain C region                             |                                  |
| 20198 | dirMS_041712_NAR_50nm_plus2.11952.11952.3  | 3 | 5.65 | 1 | 4.05E+04 |       | (K)IKDSTL(K)K(G)I)S T A Q)G)K)                  | 130.47 | 420.5781           | 1259.72  | -0.0008  | -0.6     | 5.96     | 21566.2  | 9.41    | HUMAN  | QNRK5                                            | Heterogeneous nuclear ribonucleoprotein H                        |                                  |
| 20199 | dirMS_041712_NAR_50nm_plus2.17362.17362.3  | 3 | 5.65 | 1 | 1.01E+06 |       | (K)IKDNGV(K)K(N)G/V)G(L)E P M K)I)              | 100.59 | 509.9448           | 1527.82  | -0.0001  | -0.1     | 6.07     | 29854.8  | 9.49    | HUMAN  | CJ3R0                                            | Regulator of chromosome condensation (Fragment)                  |                                  |
| 20200 | dirMS_041712_NAR_50nm_plus2.18126.18126.3  | 3 | 5.65 | 0 | 2.77E+05 |       | (R)IKDIPND(R)I)K P D N F)I)M)G)A)K)             | 163.17 | 492.5943           | 1475.767 | 0.0008   | 0.6      | 5.96     | 27968.7  | 9.69    | HUMAN  | BDRE4M                                           | Casein kinase 1 isoform alpha                                    |                                  |
| 20201 | dirMS_041712_NAR_50nm_plus2.20071.20071.3  | 3 | 5.65 | 0 | 2.09E+05 |       | (R)IKNSVY(R)I)E V)S)I)F V L)P)A)K)M)            | 174.5  | 560.6511           | 1679.948 | -0.0032  | -1.9     | 6.75     | 35663.7  | 5.91    | HUMAN  | BD4W06                                           | Selenide, water dikinase 1                                       |                                  |
| 20202 | dirMS_041712_NAR_50nm_plus2.9429.9429.3    | 3 | 5.65 | 0 | 7.71E+05 |       | (K)IKRQV(K)K(N)I)G L V T G L T T R)K)           | 117.23 | 596.3281           | 1620.825 | -0.0021  | -1.5     | 8.75     | 19612.6  | 6.24    | HUMAN  | QNRK5                                            | Prolyl-4-hydroxylase beta chain, mitochondrial                   |                                  |
| 20203 | dirMS_041712_NAR_60nm_plus2.10486.10486.3  | 3 | 5.65 | 0 | 9.97E+05 |       | (K)IKYVET(K)K(Y)A)V)T G D H)G)I)K)              | 112.45 | 434.9004           | 1302.68  | 0.0066   | 5        | 6.74     | 139883.7 | 8.06    | HUMAN  | PS321                                            | Coatomer subunit alpha                                           |                                  |
| 20204 | dirMS_041712_NAR_120nm_minus.13744.13744.3 | 3 | 5.64 | 1 | 1.31E+05 |       | (R)IKYEMF(R)K Y E M F)A Q)G)S)Q)R)G)            | 129.37 | 543.9428           | 1629.805 | -0.0085  | -5.2     | 8.59     | 90044.9  | 5.14    | HUMAN  | PS5072                                           | Translational endoplasmic reticulum ATPase                       |                                  |
| 20205 | dirMS_041712_NAR_120nm_minus.16301.16301.3 | 3 | 5.64 | 2 | 1.19E+05 |       | (K)IKGGDL(K)K(Q)G G L P M N)I)P V)S D P)R)T)    | 123.53 | 436.3552           | 1207.053 | -0.0021  | -1.1     | 9.99     | 22318.2  | 8.65    | HUMAN  | QD8R0                                            | Peroxiredoxin-1                                                  |                                  |
| 20206 | dirMS_041712_NAR_20nm_minus.12092.12092.2  | 2 | 5.64 | 0 | 3.57E+05 | M185m | (K)IKLAVN(K)K(L)N)S)P D M P D)S A L K)M)        | 170.77 | 580.3173           | 1143.634 | -15.993  | -1.6     | 9.75     | 42230.8  | 4.77    | HUMAN  | ANRZK8                                           | Putative tubulin beta chain-like protein ENSP0000290377          |                                  |
| 20207 | dirMS_041712_NAR_40nm_minus2.16063.16063.3 | 3 | 5.64 | 1 | 7.07E+05 |       | (R)IKELALG(R)E L A L)U L G L M D)P A E K D)E)K) | 189.47 | 629.0034           | 1884.999 | -0.003   | -1.6     | 4.18     | 25148.6  | 6       | HUMAN  | P10041                                           | Peroxiredoxin-6                                                  |                                  |
| 20208 | dirMS_041712_NAR_50nm_minus.16901.16901.3  | 3 | 5.64 | 0 | 2.82E+04 |       | (K)IQTVFL(K)K(Q)I)T V)G L T E)K F P S V)K)      | 164.4  | 512.6325           | 1535.883 | -0.0002  | -0.2     | 4.59     | 60559.7  | 6.97    | HUMAN  | Q60678                                           | Protein arginine N-methyltransferase 3                           |                                  |
| 20209 | dirMS_041712_NAR_60nm_minus.7531.7531.3    | 3 | 5.64 | 0 | 1.07E+05 | M43m  | (R)IKLSDG(R)E)S)G M)D)N S)M S)T)R)I)            | 99.98  | 497.9023           | 1475.698 | -0.15949 | -0.5     | 6.75     | 56607.4  | 5.37    | HUMAN  | F8V04                                            | Keratin, type II cytoskeletal 8                                  |                                  |
| 20210 | dirMS_04                                   |   |      |   |          |       |                                                 |        |                    |          |          |          |          |          |         |        |                                                  |                                                                  |                                  |

|       |                                            |   |      |   |                 |                                                       |        |            |          |         |       |       |          |       |       |        |                                                                     |
|-------|--------------------------------------------|---|------|---|-----------------|-------------------------------------------------------|--------|------------|----------|---------|-------|-------|----------|-------|-------|--------|---------------------------------------------------------------------|
| 20270 | dirMS_041712_NAR_30mM_minus129285.129285.2 | 2 | 5.61 | 1 | 1.57E+05        | (K)SKLEFNS(K)K L E F S /V P A P C)                    | 159.12 | 626.334    | 1251.662 | -0.0012 | -1    | 5.72  | 21962.5  | 5.85  | HUMAN | CJU08  | Tubulin alpha-4A chain (Fragment)                                   |
| 20271 | dirMS_041712_NAR_40mM_minus10067.10067.2   | 2 | 5.61 | 0 | 1.48E+06        | (R)VAEEN(R)R A P F E H J V L U T E A V P L N P K I A) | 161.5  | 977.5343   | 1954.064 | -0.0031 | -1.6  | 4.75  | 18032.2  | 5.25  | HUMAN | E7E56  | Actin, cytoplasmic I (Fragment)                                     |
| 20272 | dirMS_041712_NAR_50mM_minus12087.12087.3   | 3 | 5.61 | 0 | 1.57E+05        | (K)EALVQSK(R)K N L V S Q I L S /V S Q I Q)            | 181.7  | 594.3837   | 1187.651 | -0.0009 | -0.8  | 5.32  | 24209.5  | 5.64  | HUMAN | EP002  | T-complex protein 1 subunit epsilon                                 |
| 20273 | dirMS_041712_NAR_50mM_minus16286.16287.3   | 3 | 5.61 | 0 | 1.54E+05        | (K)VQDEEN(K)V V D L E N L M L T L A K I Q)            | 164.05 | 531.9638   | 1593.885 | -0.0078 | -4.9  | 4.65  | 16381.6  | 5.83  | HUMAN | FBWV2  | DCC-interacting protein 13-beta (Fragment)                          |
| 20274 | dirMS_041712_NAR_50mM_minus19979.9979.3    | 3 | 5.61 | 0 | 5.70E+05 M147m  | (K)EALVQSK(K)Q L M E A P H V D V G T P G R V I)       | 125.38 | 545.6267   | 1618.873 | -0.0023 | -1.7  | 6.75  | 20859.5  | 4.85  | HUMAN | JK325  | Eukaryotic initiation factor 4A1 (Fragment)                         |
| 20275 | dirMS_041712_NAR_60mM_minus7989.7989.3     | 3 | 5.61 | 1 | 3.82E+05        | (M)Rm5mK(R)R m 5 m K E V H D V G Q I M L N V Q N K N) | 103.83 | 657.9647   | 1923.897 | 47.5823 | -1.3  | 4.68  | 40069.4  | 4.83  | HUMAN | E7EWR1 | Tubulin beta chain                                                  |
| 20276 | dirMS_041712_NAR_20mM_plus15588.15588.2    | 2 | 5.61 | 1 | 1.37E+05        | (K)EALVQSK(R)K N L V S Q I L S /V S Q I Q)            | 181.7  | 594.3837   | 1187.651 | -0.0009 | -0.8  | 5.32  | 24209.5  | 5.64  | HUMAN | EP002  | T-complex protein 1 subunit epsilon                                 |
| 20277 | dirMS_041712_NAR_20mM_plus6997.6997.2      | 2 | 5.61 | 0 | 4.27E+05        | (R)IQEAGT(R)I Q L E A G T E V V K I Q)                | 115.35 | 537.2946   | 1073.584 | -0.0101 | -1.7  | 4.53  | 31330.8  | 9.26  | HUMAN | EYPO82 | Malate dehydrogenase, mitochondrial                                 |
| 20278 | dirMS_041712_NAR_30mM_plus13829.13829.2    | 2 | 5.61 | 0 | 1.44E+05        | (R)TFFCTG(R)K T I F C T G R V R)                      | 125.48 | 484.2579   | 967.503  | 0.0056  | 5.7   | 6.75  | 21953.7  | 6.6   | HUMAN | AP6VX3 | 26S proteasome non-ATPase regulatory subunit 4 (Fragment)           |
| 20279 | dirMS_041712_NAR_30mM_plus2697.6977.2      | 2 | 5.61 | 0 | 7.69E+04        | (R)GVDFTH(R)R V S I E D V Y V R I)                    | 91.13  | 434.2164   | 867.421  | 0.0049  | 5.6   | 4.37  | 7312.8   | 8.92  | HUMAN | PA3155 | Carnitine O-acetyltransferase                                       |
| 20280 | dirMS_041712_NAR_50mM_plus15166.15166.3    | 3 | 5.61 | 1 | 6.48E+05        | (R)GFPTFH(R)G F P T Y F Y F S A N K K I)              | 108.47 | 490.5973   | 1469.779 | -0.0014 | -0.9  | 9.7   | 55361.8  | 6.42  | HUMAN | G5E42  | Protein disulfide isomerase family A, member 3, isoform CRA_b       |
| 20281 | dirMS_041712_NAR_50mM_plus17025.17025.3    | 3 | 5.61 | 1 | 1.77E+04        | (R)KVVTFE(R)K V T V T E L V S L V G L R I)            | 156.87 | 634.160927 | 1007.047 | -0.0174 | -1.6  | 6.04  | 13983.7  | 6.52  | HUMAN | PF5121 | Coatomer subunit alpha                                              |
| 20282 | dirMS_041712_NAR_50mM_plus18020.18020.3    | 3 | 5.61 | 0 | 7.94E+04        | (K)ULPHVQ(K) L V P H V D I Q L K T I)                 | 163.23 | 430.2706   | 1288.799 | -0.0015 | -1.2  | 6.74  | 45578.2  | 7.83  | HUMAN | B4D1L2 | Isocitrate dehydrogenase [NADP]                                     |
| 20283 | dirMS_041712_NAR_50mM_plus19831.19831.3    | 3 | 5.61 | 1 | 1.66E+05        | (R)RJSLLTLE(R)R L T L E D V V K Q L I L K I)          | 172.32 | 577.3359   | 1729.995 | -0.0014 | -0.8  | 4.68  | 156318.6 | 8.61  | HUMAN | QZ7478 | ATP-dependent RNA helicase DHX29                                    |
| 20284 | dirMS_041712_NAR_50mM_plus2801.8801.3      | 3 | 5.61 | 1 | 2.37E+04        | (R)GGSDGS(R)G G S D P S S K D I P I D V Y N K I E)    | 114.08 | 609.2765   | 1825.809 | 0.0063  | 3.5   | 4.03  | 113880.5 | 9.18  | HUMAN | PH9874 | Poly [ADP-ribose] polymerase 1                                      |
| 20285 | dirMS_041712_NAR_50mM_plus16461.16461.3    | 3 | 5.61 | 0 | 7.52E+05        | (K)MPLHK(K)M T L V P E L D T L V S S R A)             | 142.2  | 541.6037   | 1628.795 | -0.0025 | -1.5  | 4.65  | 141616.6 | 6.1   | HUMAN | B7Z048 | Protein transport protein Sec24B                                    |
| 20286 | dirMS_041712_NAR_60mM_plus7320.7320.3      | 3 | 5.61 | 1 | 2.03E+05        | (K)KVEYIK(K)Y E L D N V A P E L R I)                  | 90.83  | 498.2381   | 1492.691 | 0.0083  | 5.6   | 4.25  | 49883    | 7.3   | HUMAN | PA9411 | Elongation factor Tu, mitochondrial                                 |
| 20287 | dirMS_041712_NAR_60mM_plus8111.8111.3      | 3 | 5.61 | 1 | 6.93E+05        | (K)LSRQRE(K)K I A S R O E M I Q A V E V Q S S R I)    | 100.48 | 550.2735   | 1648.807 | -0.0012 | -0.7  | 6.19  | 37486.1  | 9.03  | HUMAN | P22626 | Heterogeneous nuclear ribonucleoproteins A2/B1                      |
| 20288 | dirMS_041712_NAR_120mM_minus7277.7277.3    | 3 | 5.6  | 1 | 1.49E+06        | (R)CRMBE(R)R R V E M I D E Q V R I)                   | 93.97  | 412.8591   | 1236.546 | 0.0168  | 13.6  | 4.68  | 34502.0  | 4.74  | HUMAN | JK8M7  | Tropomyosin alpha-3 chain                                           |
| 20289 | dirMS_041712_NAR_20mM_minus10718.10718.2   | 2 | 5.6  | 0 | 9.16E+04        | (R)FUPNKS(R)F L V I P N A S Q I A S E K V R)          | 154.67 | 652.8447   | 1304.685 | -0.0024 | -1.8  | 6     | 19186.1  | 4.48  | HUMAN | B0A256 | 14-3-3 protein zeta/delta                                           |
| 20290 | dirMS_041712_NAR_30mM_minus12418.12418.2   | 2 | 5.6  | 0 | 5.81E+04        | (R)GVGVR(R)R V I V G P E L V G R I)                   | 121.18 | 523.7834   | 1046.563 | -0.0034 | -3.2  | 6     | 26616.1  | 5.68  | HUMAN | EP9P0  | Epiplakin                                                           |
| 20291 | dirMS_041712_NAR_30mM_minus18763.18763.3   | 3 | 5.6  | 0 | 4.14E+04        | (R)LNALGR(R)R N A L A S F L S E Q R I)                | 156.73 | 416.5615   | 1247.674 | -0.0043 | -3.5  | 6     | 88624.6  | 5.09  | HUMAN | C9U81  | Cytosin-A (Fragment)                                                |
| 20292 | dirMS_041712_NAR_30mM_minus20417.20417.2   | 2 | 5.6  | 0 | 3.99E+05        | (R)FLTWLR(R)R L T W L V L N V R I)                    | 175.78 | 531.8089   | 1062.611 | 0.0001  | 1     | 9.75  | 35548.6  | 4.91  | HUMAN | B4D6N0 | Asparagine-tRNA ligase, cytoplasmic                                 |
| 20293 | dirMS_041712_NAR_40mM_minus15146.15146.3   | 3 | 5.6  | 0 | 7.51E+05        | (K)ALVEJG(K)R I E V L P Q I A E H G A R R)            | 175.3  | 601.0146   | 1801.033 | -0.0038 | -2.1  | 5.4   | 53506.8  | 5.83  | HUMAN | PZ381  | Tryptophan-tRNA ligase, cytoplasmic                                 |
| 20294 | dirMS_041712_NAR_50mM_minus17312.17312.2   | 2 | 5.6  | 0 | 2.61E+05        | (R)RHPFLR(R)R H P L A T V A V S I E A E K I)          | 167.5  | 678.9837   | 1756.963 | -0.0011 | -1.8  | 6.75  | 49012.3  | 4.8   | HUMAN | ABU181 | Tubulin alpha-4A chain                                              |
| 20295 | dirMS_041712_NAR_60mM_minus17016.17016.3   | 3 | 5.6  | 1 | 2.75E+05 M182m  | (R)GMRRE(R)R m L R E D A V I L E Y K I)               | 154.95 | 518.277    | 1536.809 | 15.9975 | -1.7  | 4.68  | 67933    | 6.08  | HUMAN | P26308 | Moesin                                                              |
| 20296 | dirMS_041712_NAR_120mM_plus6137.6137.3     | 3 | 5.6  | 1 | 7.70E+05        | (R)QATQVE(R)R T A I Q E V E T Y R I)                  | 84.7   | 418.2137   | 1252.628 | -0.0015 | -1.2  | 5.81  | 61018.6  | 9.44  | HUMAN | B4DLW8 | Probable ATP synthase subunit epsilon                               |
| 20297 | dirMS_041712_NAR_20mM_plus19227.19227.2    | 2 | 5.6  | 0 | 1.54E+05        | (R)TGTAVG(R)R G A H I V D V P V G E L L G R V)        | 106.44 | 812.9497   | 1624.891 | 0.0017  | 1     | 4.14  | 15338.4  | 5.51  | HUMAN | E7EPI1 | ATP synthase subunit alpha, mitochondrial (Fragment)                |
| 20298 | dirMS_041712_NAR_20mM_plus15111.15111.2    | 2 | 5.6  | 0 | 9.98E+04        | (R)KJLQVQ(R)K J L Q V S L I S L I L I K I)            | 79.72  | 481.2131   | 961.911  | 0.0014  | 5     | 9.9   | 33209.4  | 6.05  | HUMAN | EP9P0  | 60S ribosomal protein L34                                           |
| 20299 | dirMS_041712_NAR_40mM_plus7905.7905.2      | 2 | 5.6  | 1 | 1.43E+05        | (K)ASJENS(K)S L E N S L S I K I)                      | 20.82  | 455.2395   | 889.474  | -0.002  | -2.3  | 6.05  | 43773.3  | 5.26  | HUMAN | FBV29  | Keratin, type I cytoskeletal 18                                     |
| 20300 | dirMS_041712_NAR_40mM_plus29658.9658.2     | 2 | 5.6  | 0 | 1.27E+05        | (K)PYFAEE(K)F I E F A S K I)                          | 120.15 | 446.2159   | 891.425  | -0.0002 | -0.2  | 6     | 20127.1  | 9.4   | HUMAN | HDY598 | Heat shock protein HSP 90-beta (Fragment)                           |
| 20301 | dirMS_041712_NAR_50mM_plus13069.13069.3    | 3 | 5.6  | 1 | 4.12E+05        | (K)DMESP(K)R M E S V P T L D V T L A K I D)           | 105.2  | 516.6001   | 1547.799 | -0.0128 | -4.8  | 4.56  | 85679.3  | 7.65  | HUMAN | B0ZV81 | Microtubule-associated protein                                      |
| 20302 | dirMS_041712_NAR_50mM_plus16814.16814.3    | 3 | 5.6  | 1 | 1.76E+05        | (K)DLQDQ(K)R L S V S V S V S V R I)                   | 155.75 | 518.6261   | 1558.934 | -0.0001 | -0.2  | 10.75 | 63008.6  | 10.75 | HUMAN | Z22838 | 60S ribosomal protein L35                                           |
| 20303 | dirMS_041712_NAR_50mM_plus17835.17835.3    | 3 | 5.6  | 1 | 2.25E+04        | (R)EVLKAE(R)R V A L E A L V E A S P P E R I)          | 161.83 | 605.3151   | 1813.948 | -0.0169 | -9.3  | 4.69  | 59918.2  | 5.27  | HUMAN | EP9E67 | ATP-binding cassette sub-family F member 1                          |
| 20304 | dirMS_041712_NAR_50mM_plus28919.8919.3     | 3 | 5.6  | 2 | 1.54E+05 5706s  | (K)KTDKSI(K)K T D K S I V S V T A G P S R I)          | 114.37 | 515.9644   | 1585.891 | 79.9879 | -12.9 | 9.89  | 84825.4  | 9.89  | HUMAN | Q14684 | Ribosomal RNA processing protein 1 homolog B                        |
| 20305 | dirMS_041712_NAR_60mM_plus11654.11654.3    | 3 | 5.6  | 1 | 2.78E+04        | (R)IGMDL(R)R G M D V Q P G A N L K R I)               | 119.22 | 433.8991   | 1299.684 | -0.004  | -3.1  | 8.75  | 64042.3  | 9.02  | HUMAN | Q8N1G4 | Leucine-rich repeat-containing protein 47                           |
| 20306 | dirMS_041712_NAR_60mM_plus13477.13477.3    | 3 | 5.6  | 1 | 6.01E+06        | (R)YVDMJL(R)R V D L M A F M A S K E K I)              | 127.27 | 444.2219   | 1330.649 | 0.0018  | 1.3   | 5.51  | 31718.5  | 7.17  | HUMAN | E7EUT4 | Guanine nucleotide-binding protein subunit beta-2-like 1 (Fragment) |
| 20307 | dirMS_041712_NAR_120mM_minus20389.20389.4  | 4 | 5.59 | 1 | 2.78E+04        | (R)RIGPFR(R)G I K I G P F E L Q P A I K R I)          | 167.05 | 447.2523   | 1385.499 | -0.0024 | -1.4  | 6.18  | 98292.7  | 5.49  | HUMAN | EP9P0  | Splicing factor 3B subunit 2                                        |
| 20308 | dirMS_041712_NAR_120mM_minus5384.5384.2    | 2 | 5.59 | 1 | 1.25E+05        | (R)KJAVGG(R)R K J A V G Q A L A L K I)                | 82.73  | 475.2763   | 945.547  | -0.0012 | -1.3  | 9.7   | 63448.4  | 7.29  | HUMAN | B4E022 | Transketolase                                                       |
| 20309 | dirMS_041712_NAR_120mM_minus9665.9665.3    | 3 | 5.59 | 1 | 3.38E+05        | (R)JALSTG(R)R I L S T J E K G F G Y K I)              | 107    | 419.8868   | 1257.647 | -0.0015 | -1.2  | 8.54  | 13378.8  | 6.27  | HUMAN | C9J557 | Peptidyl-prolyl cis-trans isomerase                                 |
| 20310 | dirMS_041712_NAR_20mM_minus11611.11611.2   | 2 | 5.59 | 0 | 2.23E+05        | (R)IGDGG(R)R D L G V I E V A P E Q V I)               | 163.93 | 571.3078   | 1141.611 | -0.0016 | -1.4  | 4.14  | 28466.1  | 5.78  | HUMAN | H3B5U3 | Pyruvate kinase (Fragment)                                          |
| 20311 | dirMS_041712_NAR_20mM_minus13661.13661.3   | 3 | 5.59 | 0 | 2.07E+05        | (R)FQVQ(R)R F Q V Q A A Q I A T A G V R I)            | 187.04 | 478.9212   | 1412.740 | 0.0016  | -1    | 4.53  | 10473.9  | 6.77  | HUMAN | AD2A87 | Keratin, type I cytoskeletal 18                                     |
| 20312 | dirMS_041712_NAR_20mM_minus8217.8217.2     | 2 | 5.59 | 1 | 1.44E+05        | (K)GVDGSA(K)R V I Q S I A V S A V E K I)              | 132.02 | 516.2772   | 1031.548 | -0.0009 | -0.8  | 5.84  | 26616.1  | 5.68  | HUMAN | EP9P0  | Epiplakin                                                           |
| 20313 | dirMS_041712_NAR_30mM_minus16556.16556.2   | 2 | 5.59 | 0 | 2.80E+05        | (R)ALDIRA(R)S L E A A N V A A D V Q I G I)            | 143.7  | 672.8404   | 1344.675 | -0.0019 | -1.4  | 4.14  | 56607.4  | 5.37  | HUMAN | FBVX4  | Keratin, type II cytoskeletal 8                                     |
| 20314 | dirMS_041712_NAR_30mM_minus216975.16975.2  | 2 | 5.59 | 0 | 1.97E+05 M2243m | (K)M5SQM(K)R m 5 I V I Q A M W M K I)                 | 145.78 | 587.2756   | 157.548  | 15.9957 | -0.7  | 8.34  | 26616.1  | 5.68  | HUMAN | EP9P0  | Epiplakin                                                           |
| 20315 | dirMS_041712_NAR_50mM_minus14635.14635.3   | 3 | 5.59 | 1 | 1.31E+05 M405m  | (K)K3RNFN(R)S K N V L N M W L S L T V G R V)          | 151.43 | 464.3655   | 1975.264 | 15.9999 | -2    | 8.75  | 25399.4  | 10.43 | HUMAN | FBW010 | Uncharacterized protein                                             |
| 20316 | dirMS_041712_NAR_50mM_minus18196.18196.3   | 3 | 5.59 | 1 | 6.74E+05        | (R)YVLCALP(R)R V L A L L P K L G L E R I)             | 172.47 | 527.3171   | 1579.942 | -0.005  | -3.2  | 4.79  | 276046.1 | 6.01  | HUMAN | PA3327 | Fatty acid synthase                                                 |
| 20317 | dirMS_041712_NAR_60mM_minus15252.15252.3   | 3 | 5.59 | 1 | 2.08E+05        | (R)YQEAHL(R)Y Q L E A L H L G S L V T G E I)          | 144.63 | 509.9455   | 1527.828 | -0.0059 | -3.8  | 6.75  | 47748.2  | 6.08  | HUMAN | Q00231 | 26S proteasome non-ATPase regulatory subunit 11                     |
| 20318 | dirMS_041712_NAR_60mM_minus16430.16430.3   | 3 | 5.59 | 1 | 3.17E+05        | (K)KJLSLY(K)K L S L S V I P A P T G A N K I)          | 151.1  | 478.2883   | 1432.852 | -0.0019 | -1.3  | 9.99  | 25148.6  | 6     | HUMAN | P30041 | Peroxisome-6                                                        |
| 20319 | dirMS_041712_NAR_60mM_minus6558.6558.3     | 3 | 5.59 | 1 | 2.18E+05        | (R)KJLQVQ(R)R K L S V S V S V R I)                    | 95.27  | 519.5983   | 1556.77  | 0.004   | 2.6   | 9.53  | 11447.2  | 9.81  | HUMAN | C9HY07 | Cytochrome c (Fragment)                                             |
| 20320 | dirMS_041712_NAR_120mM_plus5430.5430.3     | 3 | 5.59 | 1 | 2.32E           |                                                       |        |            |          |         |       |       |          |       |       |        |                                                                     |

|       |                                            |   |      |   |          |                                                         |        |          |          |          |       |      |          |             |        |                                                                             |
|-------|--------------------------------------------|---|------|---|----------|---------------------------------------------------------|--------|----------|----------|----------|-------|------|----------|-------------|--------|-----------------------------------------------------------------------------|
| 20379 | dirMS_041712_NAR_60mM_plus.7409.7409.3     | 3 | 5.57 | 1 | 1.93E+06 | (R)ISEKSD (R)S E I E K (V)S E G F K (A)                 | 96.8   | 452.5501 | 1355.632 | 0.0032   | 2.4   | 4.41 | 76262.2  | 9.53 HUMAN  | P23246 | Splicing factor, proline- and glutamine-rich                                |
| 20380 | dirMS_041712_NAR_60mM_plus.8824.8824.3     | 3 | 5.57 | 1 | 5.73E+05 | (K)ELTSPG (K) L A S P D / G F E G (K) S                 | 106.5  | 445.8862 | 1335.643 | 0.0014   | 1     | 4.41 | 84557.3  | 6.5 HUMAN   | Q04009 | Glutamate carboxyl-phosphatase 2                                            |
| 20381 | dirMS_041712_NAR_120mM_minus.18884.18884.4 | 2 | 5.56 | 1 | 1.33E+06 | (K)IGLGRD (K) G L R V P L V F G D V M (K) K             | 118.0  | 469.1779 | 1421.797 | -0.01    | -1.9  | 9.59 | 32016.5  | 9.45 HUMAN  | Q95923 | Helicoma-associated antigen D2                                              |
| 20382 | dirMS_041712_NAR_120mM_minus.1258.1258.4   | 4 | 5.56 | 1 | 1.23E+06 | (K)ILVTPG (K) L T T V Q (G) A V D Y X K (K) L           | 120.03 | 449.7423 | 1375.944 | 0.0038   | 2.1   | 5.71 | 13778.5  | 7.96 HUMAN  | K7M18  | Eukaryotic translation initiation factor 4B                                 |
| 20383 | dirMS_041712_NAR_30mM_minus.14371.14600.2  | 2 | 5.56 | 0 | 5.48E+05 | (K)SNFAA(K)S N F A E I A L A A H (Y) K                  | 132.62 | 579.7876 | 1158.59  | -0.0223  | -19.2 | 6.47 | 51524.1  | 4.82 HUMAN  | F5H8I2 | Protein disulfide-isomerase                                                 |
| 20384 | dirMS_041712_NAR_30mM_minus.18829.18829.2  | 2 | 5.56 | 0 | 1.91E+05 | (K)KCFVGL (K) C F V L G / G C (Y) K                     | 137.42 | 559.2673 | 1117.517 | 0.0104   | 9.3   | 8.75 | 83273.6  | 5.55 HUMAN  | P13010 | X-ray repair cross-complementing protein 5                                  |
| 20385 | dirMS_041712_NAR_30mM_minus.6573.6573.2    | 2 | 5.56 | 0 | 9.02E+04 | (K)YEMAEK (K) L E W A E E A (R) T                       | 109.9  | 479.2505 | 958.456  | -0.0015  | -1.6  | 4.53 | 5635.6   | 9.59 HUMAN  | Q60473 | Strin-70 protein, mitochondrial (Fragment)                                  |
| 20386 | dirMS_041712_NAR_40mM_minus.12744.12744.3  | 3 | 5.56 | 0 | 3.80E+05 | (K)FTSDHP (K) F T S D H P Q / I D P L V (K) N           | 159.85 | 574.3124 | 1720.927 | -0.0042  | -2.4  | 5.21 | 138084.9 | 5.52 HUMAN  | Q89V96 | Cullin-associated NEDD8-dissociated protein 1                               |
| 20387 | dirMS_041712_NAR_40mM_minus.14607.14607.3  | 3 | 5.56 | 1 | 1.01E+06 | (K)FTVYNT (K) F T V N Y / T P A E V G L V D G K (R) S   | 171.55 | 639.0252 | 1915.065 | -0.0037  | -1.9  | 5.74 | 17630.6  | 11.62 HUMAN | IL3L05 | Profilin-1 (Fragment)                                                       |
| 20388 | dirMS_041712_NAR_40mM_minus.14946.14946.3  | 3 | 5.56 | 0 | 9.64E+05 | (K)ISSDQY (K) S I Q S / V P A L E I A N A H (R) K       | 172.28 | 640.3618 | 1919.071 | 0.0      | 0     | 6.75 | 61224.7  | 5.7 HUMAN   | P18089 | 60 kDa heat shock protein, mitochondrial                                    |
| 20389 | dirMS_041712_NAR_50mM_minus.7171.7171.3    | 3 | 5.56 | 1 | 2.32E+04 | (K)IAAASA (K) A I A A S / A A G P G G L V A K E E K (K) | 107.67 | 575.9781 | 1725.913 | 0.0068   | 3.9   | 6.18 | 28864.3  | 5.45 HUMAN  | ADN1H7 | Ubiquitin protein-c-119 homolog B                                           |
| 20390 | dirMS_041712_NAR_50mM_minus.7940.7940.2    | 2 | 5.56 | 1 | 1.33E+05 | (K)IMDQET (K) M Q E T / V A D V V A D V M (K) K         | 112.82 | 596.1822 | 1574.075 | -0.001   | -1.4  | 8.35 | 32161.5  | 9.45 HUMAN  | ACT1   | Actin, alpha skeletal muscle                                                |
| 20391 | dirMS_041712_NAR_50mM_minus.8125.8125.3    | 3 | 5.56 | 1 | 1.57E+05 | (K)IGLAAD (K) K I A / D A D E / S T G S I A S (R) K     | 113.93 | 496.9372 | 1488.802 | -0.0046  | -3.1  | 6.07 | 30711.4  | 7.15 HUMAN  | H3P8P8 | Fructose-bisphosphate aldolase A (Fragment)                                 |
| 20392 | dirMS_041712_NAR_50mM_minus.16397.16397.3  | 3 | 5.56 | 0 | 3.81E+04 | (R)JNHLPP (R) N H L P P / V I T V C T A / S (R) K       | 151.35 | 580.3021 | 1738.891 | 0.0013   | 0.7   | 6.74 | 20940.9  | 10.14 HUMAN | Q8MSD7 | Cancer-related nucleoside-triphosphatase                                    |
| 20393 | dirMS_041712_NAR_120mM_plus.24038.24038.3  | 3 | 5.56 | 1 | 2.98E+05 | (R)GVMLA (R) G V M L A / V A D V I A E A K (R) K        | 180.07 | 524.9713 | 1556.908 | 15.9913  | -2.3  | 6.07 | 25252.7  | 9.52 HUMAN  | E7F9H4 | 60 kDa heat shock protein, mitochondrial (Fragment)                         |
| 20394 | dirMS_041712_NAR_120mM_plus.6494.6494.2    | 2 | 5.56 | 0 | 4.57E+04 | (K)KHPPTA (K) K Q P T A (Y) A (R) K                     | 97.75  | 485.4463 | 917.573  | -0.001   | -1    | 8.76 | 63484.4  | 7.29 HUMAN  | Q40232 | Translocase                                                                 |
| 20395 | dirMS_041712_NAR_20mM_plus.10610.10610.2   | 2 | 5.56 | 0 | 4.02E+04 | (R)ITTPFA (R) I T T P F A / P V N L A G A (R) T         | 145.83 | 619.8454 | 1837.685 | -0.0012  | -1    | 9.41 | 30051.7  | 12.1 HUMAN  | QUO325 | Serine/arginine repetitive matrix protein 2                                 |
| 20396 | dirMS_041712_NAR_20mM_plus.12192.12192.2   | 2 | 5.56 | 0 | 1.59E+05 | (K)IDLAGS (K) I D A G S / S V (R) K                     | 157.8  | 437.2558 | 873.504  | 0.0003   | 0.4   | 5.84 | 51260.6  | 5.39 HUMAN  | PE1978 | Heterogeneous nuclear ribonucleoprotein K                                   |
| 20397 | dirMS_041712_NAR_20mM_plus.9350.9350.2     | 2 | 5.56 | 0 | 9.62E+03 | (K)IAPEVY (K) A I P E V / V A P P (R) G                 | 135.58 | 533.798  | 1066.589 | -0.0004  | -0.4  | 4.53 | 113880.5 | 9.18 HUMAN  | P09874 | Poly [ADP-ribose] polymerase 1                                              |
| 20398 | dirMS_041712_NAR_30mM_plus.11500.11500.2   | 2 | 5.56 | 0 | 3.61E+05 | (R)INGDFP (R) N G D F P / I P T P (R) L                 | 113.78 | 460.2391 | 919.463  | 0.0077   | 8.4   | 5.84 | 21953.7  | 6.6 HUMAN   | ADP9V3 | 26S proteasome non-ATPase regulatory subunit 4 (Fragment)                   |
| 20399 | dirMS_041712_NAR_30mM_plus.21450.21450.2   | 2 | 5.56 | 0 | 3.33E+05 | (R)NSVLE (R) N S V L E / V P (R) K                      | 167.73 | 539.8092 | 1078.614 | -0.0032  | -2.8  | 6    | 35659.5  | 5.35 HUMAN  | BSMCC5 | Protein disulfide-isomerase A6                                              |
| 20400 | dirMS_041712_NAR_40mM_plus.6433.6433.2     | 2 | 5.56 | 0 | 2.12E+05 | (R)MGMVYD (R) M G V M D / P P (R) E                     | 96.87  | 443.1854 | 869.364  | 15.9991  | 4.7   | 5.59 | 26419.2  | 5.1 HUMAN   | HY9K7  | Splicing factor, proline- and glutamine-rich (Fragment)                     |
| 20401 | dirMS_041712_NAR_40mM_plus.6535.6535.2     | 2 | 5.56 | 0 | 6.37E+04 | (R)SDVQ (R) S D V Q / F D G G S (R) G                   | 97.52  | 485.2217 | 969.427  | 0.0089   | 9.2   | 4.21 | 15031.5  | 6.72 HUMAN  | BD4L00 | ATP-dependent RNA helicase DDX3X                                            |
| 20402 | dirMS_041712_NAR_50mM_plus.12397.12397.3   | 3 | 5.56 | 1 | 2.80E+05 | (R)ESDPPU (R) S D P P U / L V T F E F E V T (K) T       | 132.68 | 584.2981 | 1750.874 | 0.0057   | 3     | 4.25 | 19909    | 6.21 HUMAN  | Q269H8 | UPP35-56 protein CR13orf10                                                  |
| 20403 | dirMS_041712_NAR_50mM_plus.11316.11316.3   | 3 | 5.56 | 1 | 2.67E+05 | (K)ATPEK (K) A T P E K / T P P A (Y) E (R) K            | 137.27 | 475.2562 | 1423.758 | 0.0029   | 2.8   | 6.19 | 15567.5  | 6.18 HUMAN  | AD6106 | Adenylate kinase isoenzyme 1 (Fragment)                                     |
| 20404 | dirMS_041712_NAR_50mM_plus.14108.14108.3   | 3 | 5.56 | 0 | 6.71E+05 | (K)QMVND (K) K Q M V N D / V L H P G (A) K              | 142.27 | 412.804  | 1236.677 | -0.0055  | -7.6  | 6.74 | 32886.5  | 10.63 HUMAN | E7EPK6 | 40S ribosomal protein S24                                                   |
| 20405 | dirMS_041712_NAR_50mM_plus.6098.6098.3     | 3 | 5.56 | 0 | 1.25E+05 | (R)IGDMM (R) S G D M M / V S G A H P S V (R) Q          | 96.5   | 462.214  | 1384.627 | 0.0001   | 0     | 6.46 | 48340.6  | 8.84 HUMAN  | Q07666 | KH domain-containing, RNA-binding, signal transduction-associated protein 1 |
| 20406 | dirMS_041712_NAR_50mM_plus.8092.8092.3     | 3 | 5.56 | 1 | 2.37E+04 | (R)IGSDGS (R) G S D D S / S K D P / D V N Y E (L) K     | 114.08 | 609.2765 | 1825.809 | 0.0003   | 3.5   | 4.03 | 113880.5 | 9.18 HUMAN  | P09874 | Poly [ADP-ribose] polymerase 1                                              |
| 20407 | dirMS_041712_NAR_120mM_plus.10064.10064.4  | 4 | 5.55 | 0 | 3.14E+05 | (R)GKQV (R) G K Q V / L V S V D P V L (R) K             | 108.8  | 441.231  | 1263.931 | -0.0012  | -1.8  | 4.21 | 24929.3  | 6.18 HUMAN  | Q95923 | Nuclear migration protein nucleic                                           |
| 20408 | dirMS_041712_NAR_120mM_plus.11642.11642.4  | 4 | 5.55 | 1 | 4.65E+05 | (K)AAQASD (K) A A Q A S D S L E K H L D V E (K) S       | 110.88 | 417.7202 | 1567.86  | -0.0009  | -0.6  | 4.75 | 37710.6  | 6.36 HUMAN  | P73817 | Transaldolase                                                               |
| 20409 | dirMS_041712_NAR_30mM_minus.11542.11542.2  | 2 | 5.55 | 0 | 1.57E+05 | (K)SDTDM (K) S D T D M / G V M L (R) K                  | 116.67 | 539.7654 | 1078.52  | 0.0038   | 3.5   | 4.37 | 20033.5  | 5.34 HUMAN  | P49588 | Alanine-tRNA ligase, cytoplasmic                                            |
| 20410 | dirMS_041712_NAR_30mM_minus.15665.15665.2  | 2 | 5.55 | 0 | 1.99E+05 | (R)IGSDFP (R) I G S D F P / D N I D (R) S               | 138.88 | 589.8069 | 1718.605 | 0.0013   | 1.1   | 4.21 | 20631.5  | 6.98 HUMAN  | DRKAX2 | C-terminal-binding protein 1 (Fragment)                                     |
| 20411 | dirMS_041712_NAR_30mM_minus.9987.9987.2    | 2 | 5.55 | 0 | 1.44E+05 | (R)EAGS (R) E A G S / F T V S (R) K                     | 101.25 | 472.317  | 1343.611 | -0.0012  | -1.1  | 4.57 | 29315.9  | 6.98 HUMAN  | E7R0S5 | Filamin A                                                                   |
| 20412 | dirMS_041712_NAR_40mM_minus.14238.14238.3  | 3 | 5.55 | 1 | 1.90E+04 | (R)YSAAVL (R) Y S A A V L / V P L V H P L P E L R (A) R | 167.98 | 590.0205 | 1768.048 | -0.001   | -0.6  | 6.02 | 63124.2  | 9.53 HUMAN  | E7EVI5 | Nuclear receptor corepressor 1 (Fragment)                                   |
| 20413 | dirMS_041712_NAR_40mM_minus.7842.7842.3    | 3 | 5.55 | 1 | 1.59E+05 | 7766 (K) A S L R N M G / S P (K) E                      | 125.2  | 491.9311 | 1270.711 | 203.0674 | -8.1  | 8.79 | 37177.3  | 6.46 HUMAN  | P73828 | OMP-sialic acid receptor 3 (Fragment)                                       |
| 20414 | dirMS_041712_NAR_50mM_minus.15499.15499.3  | 3 | 5.55 | 1 | 1.18E+05 | (R)IGVAV (R) I G V A V / S P G D P Q / V I E (K) G      | 156.07 | 578.2997 | 1732.886 | -0.0019  | -1.1  | 4.68 | 118336.6 | 6.45 HUMAN  | CSJ152 | Presequence protease, mitochondrial                                         |
| 20415 | dirMS_041712_NAR_50mM_minus.16999.16999.3  | 3 | 5.55 | 1 | 8.59E+04 | (R)IMDQVY (R) M D Q V Y / V S W P L L K (D) K (W) K     | 165.23 | 603.3217 | 1801.931 | 0.0      | 11.1  | 5.72 | 34114.9  | 6.51 HUMAN  | E9P9M2 | Ubiquitin carboxyl-terminal hydrolase 35 (Fragment)                         |
| 20416 | dirMS_041712_NAR_50mM_minus.9532.9532.2    | 2 | 5.55 | 1 | 7.15E+05 | (R)IGDGL (R) I G D G L / V S V D P V L (R) K            | 121.97 | 737.9927 | 1473.78  | -0.0014  | -0.9  | 5.46 | 56007.4  | 6.78 HUMAN  | FR0404 | Keratin, type I cytoskeletal 8                                              |
| 20417 | dirMS_041712_NAR_60mM_minus.10128.10128.3  | 3 | 5.55 | 1 | 6.76E+04 | (K)IALDLS (K) L A L D L S S C K E A / D G V Q (R) C     | 115.93 | 633.6235 | 1898.855 | 0.0011   | 0.6   | 4.23 | 69044.6  | 6.4 HUMAN   | F5H0T1 | Stress-induced-phosphoprotein 1                                             |
| 20418 | dirMS_041712_NAR_60mM_minus.18572.18572.3  | 3 | 5.55 | 0 | 2.54E+05 | (K)IHLNDL (K) I H L N D L / S D L V L T N V (K) K       | 165.72 | 575.3117 | 1723.922 | -0.0019  | -1.1  | 4.54 | 88624.6  | 5.09 HUMAN  | CSJ8U1 | Cytosolin-A (Fragment)                                                      |
| 20419 | dirMS_041712_NAR_60mM_minus.7932.7932.3    | 3 | 5.55 | 1 | 1.24E+05 | (K)FEDYTK (K) F E D Y T K / E V T Q V (K) M             | 104.4  | 486.908  | 1458.711 | 0.0017   | -1.1  | 4.48 | 55561.8  | 6.42 HUMAN  | G5E452 | Protein disulfide isomerase family A, member 3, isoform CRA_b               |
| 20420 | dirMS_041712_NAR_60mM_minus.8662.8662.3    | 3 | 5.55 | 0 | 1.54E+05 | (K)IHLN (K) I H L N / S D L V L T N V (K) K             | 98.6   | 461.2817 | 1331.615 | -0.0017  | -1.1  | 4.8  | 53317.17 | 6.42 HUMAN  | CSJ8U1 | Arabin-1, isoform CRA_b                                                     |
| 20421 | dirMS_041712_NAR_20mM_plus.14647.14647.2   | 2 | 5.55 | 0 | 3.89E+04 | 1M185M (K) A L N M K / A N V N V / P P (R) L            | 172.75 | 580.3169 | 1413.634 | 15.9922  | -2.3  | 9.75 | 42330.8  | 4.77 HUMAN  | AN6K28 | Putative tubulin beta chain-like member ENSP0000290377                      |
| 20422 | dirMS_041712_NAR_20mM_plus.16320.16320.2   | 2 | 5.55 | 0 | 2.67E+04 | (K)IALQFL (K) I A L Q F L / Q F E V E (Y) K             | 184.07 | 538.8009 | 1076.599 | -0.0047  | -3.8  | 4.53 | 55323    | 6.02 HUMAN  | BADP18 | T-complex protein 1 subunit zeta                                            |
| 20423 | dirMS_041712_NAR_20mM_plus.6408.6408.2     | 2 | 5.55 | 0 | 2.42E+04 | (R)ISDAAV (R) S D A A V / T P S S T S S T (R) A         | 107.72 | 784.3802 | 1567.756 | -0.0021  | -1.7  | 9.47 | 42437.8  | 4.97 HUMAN  | Q16186 | Proteasomal ubiquitin receptor ADRM1                                        |
| 20424 | dirMS_041712_NAR_20mM_plus.8079.8079.2     | 2 | 5.55 | 0 | 8.95E+04 | (R)IAQDAP (R) I A Q D A P / Q A E A I P N (R) K         | 125.58 | 536.7349 | 1607.242 | 0.0003   | 0.3   | 6.05 | 43979.5  | 6.92 HUMAN  | F5CZ23 | CCN-1 domain-containing octamer-binding protein 5                           |
| 20425 | dirMS_041712_NAR_30mM_plus.18321.18321.2   | 2 | 5.55 | 0 | 1.69E+04 | (R)IVNVNS (R) V N V N V S / M S V (R) K                 | 149.1  | 595.8347 | 1105.656 | 0.006    | 5.9   | 9.72 | 30559.7  | 9.02 HUMAN  | P16152 | Carbonyl reductase [NADPH]                                                  |
| 20426 | dirMS_041712_NAR_30mM_plus.19428.19428.2   | 2 | 5.55 | 0 | 2.30E+04 | (K)IQDALP (K) I Q D A L P / A C V L A (N) K             | 155.17 | 630.8399 | 1260.677 | -0.0044  | -3.5  | 8.75 | 83400.6  | 6.82 HUMAN  | Q92499 | ATP-dependent RNA helicase DDX1                                             |
| 20427 | dirMS_041712_NAR_30mM_plus.22112.22112.2   | 2 | 5.55 | 0 | 1.40E+05 | (K)ETLLAM (K) E T L L A M / A N F (R) K                 | 170.08 | 476.7621 | 951.517  | 0.0003   | -0.3  | 6.1  | 71231.7  | 9.22 HUMAN  | E7E183 | Threonine-tRNA ligase, cytoplasmic                                          |
| 20428 | dirMS_041712_NAR_40mM_plus.10250.10250.2   | 2 | 5.55 | 0 | 1.27E+05 | (R)IQMNS (R) I Q M N S / R L N S (N) R (K)              | 124.97 | 479.2747 | 957.548  | -0.0055  | -5.7  | 9.75 | 102679.8 | 6.75 HUMAN  | Q2K742 | Slaphylloccal nuclease domain-containing protein 1                          |
| 20429 | dirMS_041712_NAR_40mM_plus.18265.18265.3   | 3 | 5.55 | 0 |          |                                                         |        |          |          |          |       |      |          |             |        |                                                                             |



|       |                                           |   |      |   |          |                                                   |                        |        |          |          |          |       |      |          |       |       |          |                                                          |
|-------|-------------------------------------------|---|------|---|----------|---------------------------------------------------|------------------------|--------|----------|----------|----------|-------|------|----------|-------|-------|----------|----------------------------------------------------------|
| 20488 | dirMS_041712_NAR_60mM_plus.6108.6108.3    | 3 | 5.52 | 1 | 3.18E+05 | (RIGSSTSR)(RIG S/C/T/E V/E K E T Q E K(M)         | C.carbamidomethylation | 91.05  | 537.9088 | 1611.717 | -0.0588  | -3    | 4.49 | 13871.4  | 9.22  | HUMAN | OT5348   | V-type proton ATPase subunit G 1                         |
| 20489 | dirMS_041712_NAR_60mM_plus.7091.7091.3    | 3 | 5.52 | 0 | 6.23E+04 | (RITFTEMD)(R)T/F/T/E/M/D/S/E E V(K)               |                        | 95.23  | 451.8597 | 1353.365 | -0.0019  | 1.3   | 4.4  | 62195.8  | 5.63  | HUMAN | 80Y0W6   | Archival 1, isoform CRA_a                                |
| 20490 | dirMS_041712_NAR_60mM_plus.9729.9729.2    | 3 | 5.52 | 0 | 1.96E+05 | (RIFATM)(R)A/T/W/A/L/V/A/V/L/V/A/V/L/V            |                        | 95.23  | 451.8597 | 1353.365 | -0.0019  | 1.3   | 4.4  | 62195.8  | 5.63  | HUMAN | 80Y0W6   | Splining factor, proline- and glutamine-rich             |
| 20491 | dirMS_041712_NAR_120mM_minus.8327.8327.2  | 2 | 5.51 | 1 | 2.26E+05 | (RHWYK)(R)W/K/H/Y/S/L/W/L/K/L                     |                        | 95.5   | 439.5774 | 878.509  | -0.0018  | -2    | 8.75 | 20033.9  | 6.24  | HUMAN | HOY0G6   | Creatine kinase B-type (Fragment)                        |
| 20492 | dirMS_041712_NAR_30mM_minus.6819.6819.2   | 2 | 5.51 | 0 | 1.71E+05 | (RIGJLDE)(R)G C/L/D/E/E/T/S/R(A)                  |                        | 91.75  | 537.9297 | 1066.447 | -0.0052  | -4.8  | 4.14 | 53377.8  | 5.74  | HUMAN | Q15149   | Plectin                                                  |
| 20493 | dirMS_041712_NAR_40mM_minus.10345.10345.2 | 2 | 5.51 | 0 | 9.93E+05 | (RIVAPEER)(R)V A/P/E/H/W/V/L/V/T E A I P(N P K(A) |                        | 143.67 | 977.5343 | 1954.064 | -0.0031  | -1.6  | 4.75 | 18032.2  | 5.25  | HUMAN | E7VE56   | Actin, cytoplasmic 1 (Fragment)                          |
| 20494 | dirMS_041712_NAR_40mM_minus.13429.13429.3 | 3 | 5.51 | 1 | 1.96E+05 | (KILGDQV)(K)G V/Q/V/Q/V/V/T/D/E L Q/D Q(L)R(Q)    |                        | 163.38 | 541.7029 | 1523.291 | -0.0034  | -1.8  | 4.58 | 42257.9  | 1.281 | HUMAN | E7C036   | T-complex protein 1 subunit alpha                        |
| 20495 | dirMS_041712_NAR_40mM_minus.13547.13547.3 | 3 | 5.51 | 0 | 1.65E+05 | 4952K                                             |                        | 163.33 | 663.6932 | 1884.048 | 110.0174 | -12.8 | 4.68 | 68047.7  | 6.79  | HUMAN | FG50K6   | Phosphatidylinositol 3,4,5-trisphosphate 5-phosphatase 1 |
| 20496 | dirMS_041712_NAR_50mM_minus.13747.13747.3 | 3 | 5.51 | 0 | 3.00E+04 | (RGTGEERF)(K)G E/G/V/G T C I M/R/N M A(N K)       |                        | 146.93 | 574.2947 | 1270.869 | 0.0009   | 0.5   | 5.81 | 38222.2  | 5.77  | HUMAN | EP9K16   | Protein arginine N-methyltransferase 1                   |
| 20497 | dirMS_041712_NAR_50mM_minus.13940.13940.3 | 3 | 5.51 | 1 | 1.44E+05 | (RISEGWA)(R)S E/G V A/V L/V/T K(S)                |                        | 146.85 | 415.225  | 1243.762 | -0.0116  | -9.7  | 8.31 | 276046.1 | 6.01  | HUMAN | PA9327   | Fatty acid synthase                                      |
| 20498 | dirMS_041712_NAR_50mM_minus.17523.17523.3 | 3 | 5.51 | 1 | 1.24E+05 | (KINAGAGA)(K)N A/Q/A/L/D L K E L(N)               |                        | 168.05 | 452.601  | 1355.789 | -0.0008  | -0.6  | 6.07 | 13786.8  | 9.33  | HUMAN | BT2451   | Transcription elongation factor A protein 1              |
| 20499 | dirMS_041712_NAR_60mM_minus.13826.13826.3 | 3 | 5.51 | 0 | 2.71E+05 | (RKYGVLE)(K)Y G/L/V/L/V/P F A(R)                  |                        | 138.02 | 492.231  | 1342.623 | -0.0006  | -4.8  | 6.75 | 28215.9  | 5.48  | HUMAN | Q15149   | Plectin                                                  |
| 20500 | dirMS_041712_NAR_120mM_plus.10472.10472.3 | 3 | 5.51 | 1 | 2.28E+05 | (RIRJRLAE)(R)R Q/L A/E/D/A/Q/Q/R(A)               |                        | 107.12 | 523.849  | 1569.834 | -0.0019  | -1.2  | 4.68 | 53377.8  | 5.74  | HUMAN | Q15149   | Plectin                                                  |
| 20501 | dirMS_041712_NAR_20mM_plus.11735.11735.2  | 2 | 5.51 | 0 | 1.38E+05 | (RJAQAALA)(R)Q A/Q/A/L/V/A/V I S A A(G)           |                        | 153.7  | 628.3565 | 1255.712 | -0.009   | -4.8  | 9.79 | 58479.6  | 6.23  | HUMAN | PA0227   | T-complex protein 1 subunit zeta                         |
| 20502 | dirMS_041712_NAR_20mM_plus.18265.18265.2  | 2 | 5.51 | 0 | 5.11E+04 | (KIFRPPD)(K)F/R/P/Q/V K(V)                        |                        | 127.99 | 479.3081 | 957.613  | -0.0042  | -3.4  | 8.75 | 25445.8  | 5.52  | HUMAN | ABM950   | L-lactate dehydrogenase (Fragment)                       |
| 20503 | dirMS_041712_NAR_20mM_plus.18829.18829.2  | 2 | 5.51 | 0 | 1.55E+05 | (RITJLTGPR)(R)I/T/J/T/G/P T A/I I F(K A)          |                        | 200.48 | 694.901  | 1783.815 | -0.0039  | -2.8  | 8.75 | 38013.7  | 6.67  | HUMAN | C15336   | Poly(C)-binding protein 1                                |
| 20504 | dirMS_041712_NAR_20mM_plus.7704.7704.3    | 3 | 5.51 | 0 | 1.18E+04 | (KAVJTEGK)(A)V T E G G A/E L/S V E E(R)           |                        | 129.32 | 511.7671 | 1532.719 | -0.005   | -3.2  | 4.09 | 17219.2  | 5.69  | HUMAN | EP9G15   | 14-3-3 protein theta (Fragment)                          |
| 20505 | dirMS_041712_NAR_30mM_plus.10255.10255.2  | 2 | 5.51 | 0 | 5.74E+05 | (KPIVATST)(K)F/V/I/A/T S T(K)                     |                        | 107.58 | 433.7497 | 866.498  | -0.0061  | -7    | 8.75 | 25891.4  | 10.67 | HUMAN | FBW181   | 60S ribosomal protein L6 (Fragment)                      |
| 20506 | dirMS_041712_NAR_30mM_plus.10555.10555.2  | 2 | 5.51 | 0 | 2.76E+05 | (KINFGDGR)(K)N F I G Q/D D I/R(I)                 |                        | 109.17 | 531.2555 | 1061.507 | -0.0027  | 2.5   | 4.21 | 136658.9 | 5.13  | HUMAN | Q15393   | Splining factor 3B subunit 3                             |
| 20507 | dirMS_041712_NAR_30mM_plus.16684.16684.2  | 2 | 5.51 | 0 | 3.85E+05 | (KJLDGEM)(K)K L/Q/L E M/L/G V(S)                  |                        | 140.38 | 573.8112 | 1146.619 | -0.0036  | -3.1  | 6    | 83880.6  | 7.33  | HUMAN | FSH855   | Protein transport protein Sec23B                         |
| 20508 | dirMS_041712_NAR_30mM_plus.21289.21289.2  | 2 | 5.51 | 0 | 1.45E+05 | (RIRWVM)(R)W V/V/L/V/N F A(R)                     |                        | 106.65 | 539.7718 | 1078.532 | 0.0047   | 4.4   | 4.37 | 73202    | 9.19  | HUMAN | C1MUL5   | Probable ATP-dependent RNA helicase DDX17                |
| 20509 | dirMS_041712_NAR_30mM_plus.22247.22247.2  | 2 | 5.51 | 0 | 2.53E+05 | (RJAIFMNP)(R)A F/I/T M/P F/D V(K)                 |                        | 171.35 | 632.8481 | 1264.694 | -0.0047  | -3.7  | 5.88 | 77799.7  | 9.09  | HUMAN | PS2272   | Heterogeneous nuclear ribonucleoprotein M                |
| 20510 | dirMS_041712_NAR_30mM_plus.9945.9945.2    | 2 | 5.51 | 0 | 6.65E+05 | (KINNTVQ)(K)N N I/T Q/V/L/N C I(R)                |                        | 105.42 | 616.3143 | 1321.621 | -0.001   | 0.1   | 9.75 | 8948     | 9.16  | HUMAN | K7E9A    | Small nuclear ribonucleoprotein Sm D2                    |
| 20511 | dirMS_041712_NAR_40mM_plus.8914.8914.2    | 2 | 5.51 | 0 | 1.05E+05 | (KIFRPPD)(K)F/R/P/Q/V K(V)                        |                        | 115.03 | 474.7301 | 948.446  | -0.0068  | 7.1   | 6    | 80527.6  | 4.94  | HUMAN | PO7900   | Heat shock protein HSP 90-alpha                          |
| 20512 | dirMS_041712_NAR_50mM_plus.10312.10312.3  | 3 | 5.51 | 0 | 8.80E+04 | M778m                                             |                        | 121.92 | 583.9631 | 1733.889 | -0.0057  | -8.3  | 8.37 | 13984.9  | 5.52  | HUMAN | Q89U96   | Cullin-associated NEDD8-dissociated protein 1            |
| 20513 | dirMS_041712_NAR_20mM_minus.7258.7258.2   | 2 | 5.5  | 0 | 2.46E+04 | (KJAVAA)(K)A/A/V/A/Q N C Y(K)                     |                        | 120.58 | 569.2917 | 1137.572 | 0.004    | 3.5   | 8.59 | 31075.7  | 5.65  | HUMAN | PG0174   | Triosephosphate isomerase                                |
| 20514 | dirMS_041712_NAR_30mM_minus.5711.5711.2   | 2 | 5.5  | 0 | 1.64E+05 | (KILQDIA)(R)Y L/A/G E/G R(L)                      |                        | 84.8   | 447.2217 | 893.448  | -0.0114  | -12.8 | 6    | 38089.6  | 6.79  | HUMAN | BD4777   | Anexin                                                   |
| 20515 | dirMS_041712_NAR_50mM_minus.1476.1476.3   | 3 | 5.5  | 0 | 5.78E+04 | (KLVYSGD)(K)I/L/V/T/S V/V V/V N Q(V)              |                        | 148.83 | 631.3336 | 1891.987 | -0.001   | -0.5  | 4.41 | 27786.2  | 5.93  | HUMAN | HOY426   | Phospholipase (Fragment)                                 |
| 20516 | dirMS_041712_NAR_50mM_minus.5765.5765.2   | 2 | 5.5  | 1 | 9.21E+05 | (KJLQDIA)(R)Y L/A/G E/G R(L)                      |                        | 84.8   | 447.2217 | 893.448  | -0.0114  | -12.8 | 6    | 38089.6  | 6.79  | HUMAN | BD4777   | Anexin                                                   |
| 20517 | dirMS_041712_NAR_50mM_minus.9008.9008.3   | 3 | 5.5  | 1 | 2.17E+04 | (KJGDSGD)(K)K V/C/S/D/S G/K F V V N Q(K)          |                        | 115.55 | 595.9474 | 1665.826 | 0.0012   | 0.7   | 5.93 | 55323    | 6.02  | HUMAN | BD4798   | T-complex protein 1 subunit zeta                         |
| 20518 | dirMS_041712_NAR_60mM_minus.10886.10886.3 | 3 | 5.5  | 1 | 1.26E+05 | (KJLKQSLP)(K)K Q S/P/P P G L A V(K)               |                        | 121.03 | 417.5985 | 1250.783 | -0.0021  | -1.7  | 10   | 8274.8   | 10.19 | HUMAN | PE1373   | 60S ribosomal protein L38                                |
| 20519 | dirMS_041712_NAR_120mM_plus.15354.15354.4 | 4 | 5.5  | 1 | 1.41E+06 | (RIVKAPP)(R)V K P A/P D T S/F/S/E A L L K(R)      |                        | 122.63 | 472.7599 | 1888.017 | -0.0003  | -0.2  | 6.15 | 43289.6  | 5.19  | HUMAN | Q12305   | Interleukin enhancer-binding factor 2                    |
| 20520 | dirMS_041712_NAR_120mM_plus.16333.16333.3 | 3 | 5.5  | 1 | 5.35E+05 | (RIRJGPR)(R)R J/G/V/V/T/D E L S(T/R)              |                        | 98.33  | 438.9735 | 1214.968 | -0.002   | -1.1  | 4.75 | 48337.8  | 6.79  | HUMAN | EP9V15   | Plectin                                                  |
| 20521 | dirMS_041712_NAR_20mM_plus.14930.14930.2  | 2 | 5.5  | 0 | 1.90E+05 | M137m                                             |                        | 173.63 | 794.3555 | 1555.713 | 31.9906  | 0.5   | 3.91 | 45157.9  | 5.45  | HUMAN | E7C0C2   | Eukaryotic initiation factor 4A-II                       |
| 20522 | dirMS_041712_NAR_20mM_plus.15660.15660.3  | 3 | 5.5  | 0 | 1.93E+04 | (RJIIDVVM)(R)I D V V V N A/S N E L V(R)           |                        | 179.13 | 573.6388 | 1718.907 | -0.0053  | -3.1  | 4.37 | 24490    | 10.56 | HUMAN | PE2241   | 40S ribosomal protein S8                                 |
| 20523 | dirMS_041712_NAR_20mM_plus.16801.16801.2  | 2 | 5.5  | 0 | 3.52E+05 | (KJLGSVM)(K)G L G S A/V/V/A/E/G(K/P L)            |                        | 186.13 | 670.8917 | 1340.778 | -0.0023  | -1.9  | 6    | 72956    | 8.8   | HUMAN | EP9Z25   | Cofilin-1                                                |
| 20524 | dirMS_041712_NAR_20mM_plus.7446.7446.2    | 2 | 5.5  | 0 | 6.35E+03 | (KJLSDLP)(K)K L/G/L/S/D S/N K(K)                  |                        | 119.68 | 566.7715 | 1132.548 | -0.0123  | -10.7 | 4.14 | 52088.9  | 5.35  | HUMAN | Q02790   | Peptidyl-prolyl cis-trans isomerase FKBP4                |
| 20525 | dirMS_041712_NAR_30mM_plus.14499.14499.3  | 3 | 5.5  | 0 | 1.03E+04 | (KJLVGSD)(K)K W/G I/S/G/V/T A/C K(L)              |                        | 127.72 | 545.28   | 1633.821 | 0.0041   | 2.5   | 9.7  | 42328.4  | 4.76  | HUMAN | BE6-ense | Beta-ense                                                |
| 20526 | dirMS_041712_NAR_30mM_plus.15759.15759.3  | 3 | 5.5  | 0 | 8.25E+05 | (RJAJLEAA)(R)S L E A A/V/D A/E Q(R)               |                        | 144.8  | 448.8963 | 1344.675 | -0.001   | -0.8  | 4.14 | 56607.4  | 5.37  | HUMAN | FBV084   | Keratin, type II cytoskeletal 8                          |
| 20527 | dirMS_041712_NAR_30mM_plus.4089.4126.2    | 2 | 5.5  | 0 | 1.27E+06 | M299m                                             |                        | 68.87  | 549.2125 | 1065.427 | 31.9903  | 0.4   | 5.84 | 50199.4  | 4.75  | HUMAN | AN6N2Z   | Tubulin beta-8 chain-like protein LOC206334              |
| 20528 | dirMS_041712_NAR_30mM_plus.8161.8161.2    | 2 | 5.5  | 0 | 2.73E+05 | (KJAEANA)(K)E I/A E A L G(K)                      |                        | 96.92  | 472.755  | 944.505  | -0.002   | -2.1  | 4.53 | 36992.9  | 6.37  | HUMAN | P15342   | Heterogeneous nuclear ribonucleoprotein H3               |
| 20529 | dirMS_041712_NAR_40mM_plus.2856.2856.2    | 2 | 5.5  | 0 | 5.85E+05 | (KJLSDLP)(K)K L/G/L/S/D S/N K(K)                  |                        | 127.72 | 545.28   | 1633.821 | 0.0041   | 2.5   | 9.7  | 42328.4  | 4.76  | HUMAN | BE6-ense | Beta-ense                                                |
| 20530 | dirMS_041712_NAR_50mM_plus.10147.10147.3  | 3 | 5.5  | 0 | 3.78E+05 | (RIMVQVM)(R)M V/Q/V/W/E/S G I S(K)                |                        | 121.6  | 539.5929 | 1616.777 | 0.006    | 3.7   | 5.38 | 87447.6  | 6.44  | HUMAN | Q15347   | Protein transport protein Sec23B                         |
| 20531 | dirMS_041712_NAR_50mM_plus.12274.12274.3  | 3 | 5.5  | 0 | 6.81E+04 | (RIMSCFSR)(R)M S/C/S F/S/P T P L D(R)             |                        | 132.48 | 620.6339 | 1559.889 | -0.0043  | -2.5  | 9.75 | 300351.7 | 12.1  | HUMAN | QU0Q35   | Serine/arginine repetitive matrix protein 2              |
| 20532 | dirMS_041712_NAR_50mM_plus.13027.13027.3  | 3 | 5.5  | 0 | 7.93E+05 | (RIVMVSVE)(R)R L H V S E M/P/V/P I T L R(V)       |                        | 137.38 | 520.6339 | 1559.889 | -0.0033  | -2.1  | 6.72 | 64042.3  | 9.02  | HUMAN | Q8N164   | Leucine-rich repeat-containing protein 47                |
| 20533 | dirMS_041712_NAR_50mM_plus.13779.13779.3  | 3 | 5.5  | 1 | 5.35E+05 | (KJGGVLE)(K)S E/L/V/E/V/T/D E A R D V F E(K)      |                        | 141.18 | 638.9735 | 1514.968 | -0.002   | -1.1  | 4.14 | 53377.8  | 5.74  | HUMAN | Q15149   | Plectin                                                  |
| 20534 | dirMS_041712_NAR_50mM_plus.14114.14114.3  | 3 | 5.5  | 1 | 4.28E+05 | (KJTSADTQ)(R)S I/L/A I/D/T/J/V Q N R(F)           |                        | 142.58 | 491.6191 | 1472.843 | -0.0004  | -0.3  | 8.41 | 48851.3  | 9.2   | HUMAN | K7E6E3   | ATP synthase subunit alpha, mitochondrial                |
| 20535 | dirMS_041712_NAR_50mM_plus.14562.14562.3  | 3 | 5.5  | 1 | 5.40E+05 | (RJAQAEK)(R)Q A/K E/L Q/F A/T/S E N L P(R)        |                        | 144.47 | 638.0091 | 1912.029 | -0.0159  | -8.3  | 6.14 | 58250.7  | 5.94  | HUMAN | BAE283   | Apoptosis inhibitor 5                                    |
| 20536 | dirMS_041712_NAR_50mM_plus.20588.20588.3  | 3 | 5.5  | 1 | 1.67E+04 | (KJSLVLE)(K)S S/L/V/L/E/R G D F L P(K)            |                        | 127.78 | 579.3128 | 1375.913 | 0.0113   | 6.5   | 5.79 | 73288.1  | 8.96  | HUMAN | ESRHK8   | Dynamin-3                                                |
| 20537 | dirMS_041712_NAR_50mM_plus.9236.9236.3    | 3 | 5.5  | 1 | 8.78E+05 | (KJTAQVGE)(K)T/A/V/C/D/P/P/P G L(K)               |                        | 116.07 | 442.9121 | 1326.72  | -0.0019  | -1.0  | 6.4  | 50199.4  | 4.75  | HUMAN | AN6N2Z   | Tubulin beta-8 chain-like protein LOC206334              |
| 20538 | dirMS_041712_NAR_120m                     |   |      |   |          |                                                   |                        |        |          |          |          |       |      |          |       |       |          |                                                          |

|       |                                            |   |      |   |                 |                                                  |        |          |          |          |      |      |          |             |         |                                                               |
|-------|--------------------------------------------|---|------|---|-----------------|--------------------------------------------------|--------|----------|----------|----------|------|------|----------|-------------|---------|---------------------------------------------------------------|
| 20597 | dirMS_041712_NAR_60mM_plus.7310.7310.3     | 3 | 5.47 | 1 | 9.38E+05        | (RIAVTGV (R)A V T G V/KV/D P /V/S/G K)K          | 96.6   | 429.2193 | 1285.642 | 0.0011   | 0.8  | 8.47 | 533778   | 5.74 HUMAN  | Q51549  | Plectin                                                       |
| 20598 | dirMS_041712_NAR_120mM_minus.12321.12322.3 | 3 | 5.46 | 1 | 5.88E+04        | (KFLNKSL (K) F N A /S D E K D D V/R K)K          | 120.22 | 445.9006 | 1335.69  | -0.0011  | -2.3 | 4.56 | 25082    | 11.29 HUMAN | AZAR95  | 405 ribosomal protein S6                                      |
| 20599 | dirMS_041712_NAR_120mM_plus.13711.13712.4  | 2 | 5.46 | 2 | 8.32E+05 M10m   | (KIKGGGL (K)K V L Q /L G L G L V P T G R K R)T   | 128.55 | 513.2647 | 1025.513 | 0.0097   | 9.4  | 8.59 | 45578.2  | 9.83 HUMAN  | Q09130  | Porecectin-1                                                  |
| 20600 | dirMS_041712_NAR_120mM_minus.16420.16420.3 | 3 | 5.46 | 1 | 3.91E+05        | (REKALLA (R)E H A A L /L V A /V D /V Q /K)K      | 144.38 | 498.9186 | 1314.742 | -0.0004  | -0.3 | 6.85 | 50043    | 9.13 HUMAN  | P6J80A  | Elongation factor 1-55                                        |
| 20601 | dirMS_041712_NAR_120mM_minus.17043.17043.3 | 3 | 5.46 | 1 | 4.97E+05        | (KJRSJEF (K)R I S E Q /T I A M F R)R             | 147.8  | 462.5714 | 1385.699 | 0.0002   | 0.2  | 9.6  | 42831.5  | 4.86 HUMAN  | AKB85A  | HCG19850A, isoform CRA_f                                      |
| 20602 | dirMS_041712_NAR_120mM_minus.7574.7574.4   | 4 | 5.46 | 1 | 4.21E+05        | (RRIRVPA (R)R V I V P A D L P V E V P P R)R      | 96.05  | 406.2323 | 1621.906 | 0.0013   | 0.8  | 6.07 | 18794.8  | 5.78 HUMAN  | BAE3CS  | Transcriptional regulator ERG                                 |
| 20603 | dirMS_041712_NAR_20mM_minus.14111.14112.2  | 2 | 5.46 | 0 | 1.42E+06        | (KSYSLVF (K)K V L P /D V G Q L V P T G R R)R     | 101.15 | 395.3481 | 1792.692 | -0.003   | -1.7 | 4.14 | 12395.1  | 5.83 HUMAN  | ASJ030  | POTE family domain family member F                            |
| 20604 | dirMS_041712_NAR_30mM_minus.215663.15663.2 | 2 | 5.46 | 0 | 2.70E+04 M1342m | (RIASSLV (R)S V L V /L W Q /A G L V)R            | 138.55 | 640.3185 | 1263.64  | 15.9895  | 4.2  | 6.05 | 266161   | 5.68 HUMAN  | EP9P0U  | Epiplakin                                                     |
| 20605 | dirMS_041712_NAR_30mM_minus.5471.5471.2    | 2 | 5.46 | 0 | 9.90E+04        | (KQSYVGG (K)K D S V /V V /G D E A S Q R)K        | 83.88  | 599.7632 | 1198.522 | -0.0031  | -2.6 | 4.03 | 32616.5  | 5.18 HUMAN  | AN6L76  | Actin, alpha skeletal muscle                                  |
| 20606 | dirMS_041712_NAR_30mM_minus.9515.9630.2    | 2 | 5.46 | 0 | 3.09E+05 M27m   | (KVEADPA (K)E I /D P /S K)H                      | 106.52 | 495.7528 | 787.42   | 203.0787 | 0.07 | 4.37 | 111614   | 6.1 HUMAN   | Q9P1Q0  | Vacuolar protein sorting-associated protein 54                |
| 20607 | dirMS_041712_NAR_50mM_minus.10517.10517.3  | 3 | 5.46 | 0 | 2.90E+05 M35m   | (KQVSKA (K)K A /S D A /A T T E L P P T H P R)L   | 127.9  | 612.6486 | 1815.937 | 15.9492  | -0.4 | 5.32 | 12926.1  | 4.4 HUMAN   | K7W6Z0  | 14-3-3 protein epsilon (Fragment)                             |
| 20608 | dirMS_041712_NAR_50mM_minus.14846.14846.3  | 3 | 5.46 | 1 | 6.81E+04 M84m   | (KRETKQ (K)R E E T /S L /S L D /R)K              | 122.45 | 481.3527 | 1591.921 | 15.9093  | 2.2  | 4.56 | 43371.3  | 5.26 HUMAN  | KY9919  | Keratin, type I cytoskeletal 18                               |
| 20609 | dirMS_041712_NAR_50mM_minus.9431.9431.3    | 3 | 5.46 | 0 | 6.17E+04        | (RDLSPKR (R) L S K P /G A /L /N /R)K             | 121.75 | 418.2465 | 1252.726 | -0.001   | -0.8 | 8.59 | 84798.4  | 5.92 HUMAN  | B727B9  | Neurexophilin                                                 |
| 20610 | dirMS_041712_NAR_60mM_minus.16580.16580.3  | 3 | 5.46 | 1 | 9.23E+04        | (KQKSGSL (R)K Q S L E /L /I /H /A /K)K           | 152.13 | 514.9657 | 1542.885 | -0.0024  | -1.6 | 8.59 | 31075.7  | 5.65 HUMAN  | PM0174  | Triosephosphate isomerase                                     |
| 20611 | dirMS_041712_NAR_120mM_plus.25634.25634.3  | 3 | 5.46 | 1 | 4.34E+05        | (RIGVMLA (R)R V M /L A /V D A /V I A E /L /K)K   | 193.17 | 519.6402 | 1556.908 | -0.002   | -1.3 | 6.07 | 25257.7  | 9.52 HUMAN  | E7F9H4  | 60 kDa heat shock protein, mitochondrial (Fragment)           |
| 20612 | dirMS_041712_NAR_120mM_plus.6130.6130.2    | 2 | 5.46 | 1 | 2.32E+05        | (KQREYV (K)R I E E /V P R)R                      | 84.97  | 539.6281 | 1616.532 | -0.0008  | -0.8 | 4.6  | 42303.8  | 4.77 HUMAN  | ANJZ68  | Putative tubulin beta chain-like protein ENSO000030377        |
| 20613 | dirMS_041712_NAR_20mM_plus.9563.9563.2     | 2 | 5.46 | 0 | 4.68E+05        | (RHSYV (R)S /V /V /Y V N E A /T /G R)K           | 138.13 | 651.3211 | 1301.637 | -0.0023  | -1.8 | 6    | 27549.9  | 4.39 HUMAN  | EP9R14  | Tubulin beta chain                                            |
| 20614 | dirMS_041712_NAR_30mM_plus.12565.12565.2   | 2 | 5.46 | 0 | 2.52E+05        | (RNCSSFU (R)N /C /S /V /F /V /K)R                | 118.73 | 484.7469 | 968.487  | -0.0005  | -0.5 | 8.75 | 7945.1   | 11.03 HUMAN | CN1850  | 60S ribosomal protein L28                                     |
| 20615 | dirMS_041712_NAR_30mM_plus.16471.16471.3   | 3 | 5.46 | 0 | 4.35E+05        | (KLLDVLG (K) L D /L /V /Q /S C N /Y K)K          | 139.08 | 494.2566 | 1489.746 | 0.0008   | 5.9  | 5.83 | 14855.1  | 9.26 HUMAN  | ELI40D1 | NHP2 non-histone chromosome protein 2-like 1 (S. cerevisiae)  |
| 20616 | dirMS_041712_NAR_30mM_plus.21510.17150.2   | 2 | 5.46 | 0 | 1.48E+05        | (KWRVYMK (R)W /P /M S T K)R                      | 143.55 | 513.2647 | 1025.513 | 0.0097   | 9.4  | 8.59 | 45578.2  | 9.83 HUMAN  | Q40L12  | Isolectin B4 hemagglutinin (Fragment)                         |
| 20617 | dirMS_041712_NAR_30mM_plus.17464.17464.2   | 2 | 5.46 | 0 | 3.18E+05        | (RILSYTQL (R)I S V /T /Q /L /L /R)R              | 145.38 | 497.2502 | 993.753  | 0.0004   | 0.4  | 8.75 | 53377.8  | 5.74 HUMAN  | Q15149  | Plectin                                                       |
| 20618 | dirMS_041712_NAR_40mM_plus.19040.19040.3   | 3 | 5.46 | 1 | 6.36E+03        | (R)VISGVL (R) V I S G V /L Q /L G N I V F K)E    | 178.52 | 539.0014 | 1614.994 | -0.0045  | -2.8 | 10   | 227783.5 | 5.5 HUMAN   | P35579  | Myosin-9                                                      |
| 20619 | dirMS_041712_NAR_40mM_plus.9546.9546.3     | 3 | 5.46 | 0 | 3.47E+04        | (R)IGGGM (R)G G G G /V /G /P /G S /N F R)G       | 119.3  | 459.8801 | 1377.629 | -0.0037  | -2.7 | 9.75 | 37486.1  | 9.03 HUMAN  | P26226  | Heterogeneous nuclear ribonucleoproteins A2/B1                |
| 20620 | dirMS_041712_NAR_50mM_plus.16299.18299.3   | 3 | 5.46 | 0 | 3.57E+05        | (KMLNWH (K)M /N /H /S /L /P /S F)K               | 164.5  | 499.6132 | 1496.829 | -0.0043  | -2.9 | 8.52 | 60871.9  | 6.3 HUMAN   | BAQ093  | Phosphorylformylglycylamino dipeptide cyclase                 |
| 20621 | dirMS_041712_NAR_50mM_plus.9487.9487.3     | 3 | 5.46 | 1 | 3.39E+05        | (R)IAGTV (R)A G T /G V /D /V /D /E A /A T R K)K  | 117.4  | 538.6108 | 1616.824 | 0.0001   | 0.6  | 5.46 | 57391.2  | 6.29 HUMAN  | Q31475  | D-3-phosphoglycerate dehydrogenase                            |
| 20622 | dirMS_041712_NAR_50mM_plus.9994.9994.3     | 3 | 5.46 | 0 | 2.40E+04 M457M  | (R)IMGPLG (R)M /G /P /U /G /D H m A S Q /R)K     | 115.67 | 549.2613 | 1613.77  | 31.9919  | 1.3  | 5.3  | 77999.7  | 9.09 HUMAN  | PS2272  | Heterogeneous nuclear ribonucleoprotein M0                    |
| 20623 | dirMS_041712_NAR_60mM_plus.15129.15129.3   | 3 | 5.46 | 1 | 1.67E+05        | (R)IYSPYR (R)G V /S /P /Y F I N T S K G /E)K     | 134.73 | 568.2935 | 1702.88  | -0.014   | -8.2 | 9.53 | 61224.7  | 5.7 HUMAN   | P10809  | 60 kDa heat shock protein, mitochondrial                      |
| 20624 | dirMS_041712_NAR_60mM_plus.18256.18256.3   | 3 | 5.46 | 1 | 1.18E+05        | (K)MIGGG (K)M /G /S /G /L S /D /T T K)K          | 154.27 | 495.2592 | 1483.763 | 0.0017   | 1.1  | 8.35 | 33782.7  | 5.78 HUMAN  | BA07C3  | Heterogeneous nuclear ribonucleoprotein D0                    |
| 20625 | dirMS_041712_NAR_60mM_plus.5028.5028.3     | 3 | 5.46 | 1 | 3.95E+05        | (K)IYSPYR (R)G V /S /P /Y F I N T S K G /E)K     | 81.53  | 531.551  | 1561.262 | 0.0004   | 0.3  | 3.76 | 14521.4  | 4.82 HUMAN  | BBZ214  | Thymosin alpha-1                                              |
| 20626 | dirMS_041712_NAR_60mM_plus.9482.9482.3     | 3 | 5.46 | 0 | 8.21E+04        | (K)IQEYD (K)E V D E S /D S /V /N /H /K)K         | 107.52 | 506.2392 | 1516.703 | 0.0004   | 0.3  | 4.65 | 123097.1 | 5.83 HUMAN  | AS45E0  | POTE ankyrin domain family member F                           |
| 20627 | dirMS_041712_NAR_120mM_minus.8454.8454.3   | 3 | 5.47 | 0 | 6.90E+05        | (K)Q P E K P E S E /L E /L T A E R)K             | 107.03 | 484.5714 | 1451.701 | -0.0016  | -1.1 | 4.5  | 51524.1  | 4.82 HUMAN  | F8H512  | Protein disulfide-isomerase                                   |
| 20628 | dirMS_041712_NAR_120mM_minus.11850.11850.2 | 2 | 5.45 | 0 | 1.25E+05 M98m   | (R)TLTVDY (R)T I /T /H /V D /T G /G /M /T K)A    | 99.35  | 483.3669 | 1349.735 | 15.9922  | -2.1 | 5.5  | 20152.4  | 4.58 HUMAN  | GV3V28  | Heat shock protein HSP 90-alpha (Fragment)                    |
| 20629 | dirMS_041712_NAR_120mM_minus.8570.8570.2   | 2 | 5.45 | 0 | 1.04E+05        | (R)IYSPYR (R)G V /S /P /Y F I N T S K G /E)K     | 107.52 | 506.2392 | 1516.703 | 0.0004   | 0.3  | 4.65 | 123097.1 | 5.83 HUMAN  | AS45E0  | POTE ankyrin domain family member F                           |
| 20630 | dirMS_041712_NAR_30mM_minus.213874.13874.2 | 2 | 5.45 | 0 | 2.14E+05        | (R)ISSLYYR (R)S I S /L /V /Y /T G /K)K           | 128.28 | 580.7949 | 1160.583 | -0.0009  | -0.7 | 5.72 | 32003.1  | 5.29 HUMAN  | H78V16  | Nucleolin (Fragment)                                          |
| 20631 | dirMS_041712_NAR_30mM_minus.16733.16733.2  | 2 | 5.45 | 0 | 5.22E+05        | (R)RFFMGM (R)F /M /G /M /N /Q /V /K)K            | 145.55 | 542.2866 | 1083.566 | 0.0004   | 0.3  | 8.75 | 83273.6  | 5.55 HUMAN  | P13010  | X-ray repair cross-complementing protein 5                    |
| 20632 | dirMS_041712_NAR_30mM_minus.18318.18318.3  | 3 | 5.45 | 0 | 5.00E+05        | (R)IQJAEY (R)Q A Q E /V E /A /L /N /K)V          | 154.63 | 473.9196 | 1419.748 | -0.0036  | -2.5 | 4.53 | 43773.3  | 5.26 HUMAN  | F8V729  | Keratin, type I cytoskeletal 18                               |
| 20633 | dirMS_041712_NAR_50mM_minus.11654.11654.3  | 3 | 5.45 | 1 | 1.89E+04        | (R)IQLAND (R)I V /L A /V D /D A /D L A V A E K)K | 134.4  | 603.9924 | 1809.97  | -0.0079  | -4.3 | 4.23 | 32837.5  | 6.16 HUMAN  | BA8008  | Phosphoglucomutase-2                                          |
| 20634 | dirMS_041712_NAR_50mM_minus.1849.1849.3    | 3 | 5.45 | 0 | 2.38E+05        | (R)KLDWH (K)S Q /L /D /W /N /K)K                 | 168.48 | 422.9181 | 1264.742 | -0.0019  | -1.5 | 6.46 | 83273.6  | 5.55 HUMAN  | P13010  | X-ray repair cross-complementing protein 5                    |
| 20635 | dirMS_041712_NAR_20mM_plus.11013.11013.2   | 2 | 5.45 | 0 | 6.40E+03 M94m   | (R)IYSPYR (R)S /M /V /V /D G /V /K)K             | 147.97 | 619.8249 | 1222.65  | 15.9525  | -1.9 | 5.84 | 13010.7  | 9.97 HUMAN  | AN6N19  | Peroxisome-55, mitochondrial                                  |
| 20636 | dirMS_041712_NAR_20mM_plus.14043.14043.2   | 2 | 5.45 | 0 | 1.56E+05 M88m   | (R)IYSPYR (R)T I /T /H /V D /T G /G /M /T K)A    | 167.95 | 683.3671 | 1349.735 | 15.9524  | -1.8 | 5.5  | 20152.4  | 4.58 HUMAN  | GV3V28  | Heat shock protein HSP 90-alpha (Fragment)                    |
| 20637 | dirMS_041712_NAR_20mM_plus.19219.19219.2   | 2 | 5.45 | 0 | 3.08E+04        | (R)ISVLALC (R)S V /V /L /V /G /E F T P K)K       | 204.25 | 337.3763 | 1273.251 | -0.0061  | -4.8 | 8.8  | 80142.6  | 5.95 HUMAN  | Q9N0X8  | ATP-binding cassette sub-family F member 3                    |
| 20638 | dirMS_041712_NAR_30mM_plus.8636.8636.2     | 2 | 5.45 | 0 | 5.90E+05        | (R)IYSPYR (R)G V /S /P /Y F I N T S K G /E)K     | 81.53  | 531.551  | 1561.262 | 0.0004   | 0.3  | 3.76 | 14521.4  | 4.82 HUMAN  | BBZ214  | Thymosin alpha-1                                              |
| 20639 | dirMS_041712_NAR_30mM_plus.11284.11284.3   | 3 | 5.45 | 0 | 3.70E+05 M304m  | (R)IMSGYR (R)M G G /M A M G C /V /N /G N)R       | 112.93 | 518.8921 | 1538.67  | 15.9593  | -1.7 | 9.5  | 49379.5  | 8.92 HUMAN  | F5GM23  | NON-POU domain-containing octamer-binding protein             |
| 20640 | dirMS_041712_NAR_30mM_plus.19450.19450.2   | 2 | 5.45 | 0 | 1.78E+05        | (K)ICALDFH (K)C A /L /D /F F R)K                 | 155.77 | 464.7242 | 928.344  | 0.0066   | 7.1  | 5.84 | 153874.4 | 6.02 HUMAN  | F5H7V7  | NADH dehydrogenase [ubiquinone] 1 alpha subcomplex subunit 8  |
| 20641 | dirMS_041712_NAR_30mM_plus.6961.6961.2     | 2 | 5.45 | 0 | 2.58E+05        | (K)MAGFD (K)M A /Q /D /V A /K)K                  | 91.35  | 405.6961 | 810.381  | 0.0035   | 4.3  | 5.59 | 56491.1  | 7.78 HUMAN  | BA07G2  | Elongation factor 1-gamma                                     |
| 20642 | dirMS_041712_NAR_30mM_plus.7778.7778.2     | 2 | 5.45 | 0 | 2.03E+05        | (R)ELCQD (R)E L Q /D /V /D /V)K                  | 94.75  | 422.7299 | 944.452  | -0.002   | -0.3 | 4.53 | 20228.6  | 5.88 HUMAN  | AN2323  | Fer-1-like protein 4                                          |
| 20643 | dirMS_041712_NAR_40mM_plus.19427.19427.3   | 3 | 5.45 | 0 | 1.01E+04        | (K)SGLAEK (K)S A /T /L E /L /V S /L P A V R)K    | 182.63 | 535.3088 | 1603.917 | -0.0048  | -3.1 | 5.4  | 52378.2  | 6.32 HUMAN  | CN242   | 35S proteasome non-ATPase regulatory subunit 6                |
| 20644 | dirMS_041712_NAR_40mM_plus.5842.5842.2     | 2 | 5.45 | 1 | 1.68E+05        | (R)ISQKAE (R)S K Q /A /E V E /F)K                | 92.1   | 484.2139 | 967.437  | -0.0002  | -0.2 | 4.25 | 71231.7  | 4.92 HUMAN  | E7ER13  | Threonine-tRNA ligase, cytoplasmic                            |
| 20645 | dirMS_041712_NAR_50mM_plus.11509.11509.3   | 3 | 5.45 | 1 | 2.02E+05        | (R)IMYDWR (R)M /D /V /E K E D V N E I R)L        | 128.03 | 582.6309 | 1745.874 | 0.0043   | 2.5  | 4.18 | 81934.1  | 6.08 HUMAN  | P33993  | DNA replication licensing factor CM7                          |
| 20646 | dirMS_041712_NAR_50mM_plus.15506.15506.3   | 3 | 5.45 | 1 | 6.37E+05        | (R)IGYFTY (R)F P P T /Y F /S P A N K)K           | 115.43 | 496.5973 | 1469.779 | -0.0014  | -0.9 | 9.7  | 55361.8  | 6.42 HUMAN  | G5E452  | Protein disulfide isomerase family A, member 3, isoform CRA_b |
| 20647 | dirMS_041712_NAR_50mM_plus.18886.18886.3   | 3 | 5.4  |   |                 |                                                  |        |          |          |          |      |      |          |             |         |                                                               |

|       |                                            |   |      |                 |                                                          |        |          |          |         |       |      |          |       |       |        |                                                                              |
|-------|--------------------------------------------|---|------|-----------------|----------------------------------------------------------|--------|----------|----------|---------|-------|------|----------|-------|-------|--------|------------------------------------------------------------------------------|
| 20706 | dirMS_041712_NAR_30mM_plus2.18175.18175.2  | 2 | 5.42 | 0.192E+04       | (RIGENLGR) (R)G E N L A/G F/R (D)                        | 147.07 | 517.7625 | 1034.526 | -0.0068 | -8.5  | 4.53 | 215817.4 | 6.54  | HUMAN | QBHCW2 | Plexin-A4                                                                    |
| 20707 | dirMS_041712_NAR_30mM_plus2.5334.5334.2    | 2 | 5.42 | 0.567E+04       | (RT)DTGGT (R)T (D)T (D)T (E)P M G/R (D)                  | 81.95  | 482.2128 | 963.42   | -0.0017 | -1.8  | 4.37 | 85057.6  | 4.94  | HUMAN | PO7900 | Heat shock protein HSP 90-alpha                                              |
| 20708 | dirMS_041712_NAR_40mM_plus2.10111.10111.3  | 2 | 5.42 | 2.135E+05       | (K)SSELVAM (K)E L V/A/M/A/P/E E L R/A (R)                | 174.5  | 579.9662 | 1791.979 | -0.0045 | -2.5  | 9.99 | 150020.8 | 9.11  | HUMAN | E7E020 | Actin                                                                        |
| 20709 | dirMS_041712_NAR_30mM_plus2.8370.8370.2    | 2 | 5.42 | 0.286E+05       | (R)IQDQSG (R)Q (V)G/Q (L)G/G (A) L A R L A R (S)         | 109.65 | 405.7703 | 1129.624 | -0.0027 | -1.6  | 8.75 | 27033.1  | 5.51  | HUMAN | B4D9W4 | ADP-ribosyltransferase                                                       |
| 20710 | dirMS_041712_NAR_40mM_plus2.9535.9535.2    | 2 | 5.42 | 0.315E+04       | (R)ITSASL (R)T S/A (S)A (V) L/R (E)                      | 119.23 | 430.7617 | 860.52   | -0.0039 | -4.5  | 9.41 | 44227.3  | 7.81  | HUMAN | E7E06E | T-complex protein 1 subunit alpha                                            |
| 20711 | dirMS_041712_NAR_50mM_plus2.20037.20037.3  | 2 | 5.42 | 0.528E+05       | (R)IQARPT (R)Q/A R P T Y A/T A/M (L)G S L/L (K)          | 174.55 | 597.9962 | 1791.979 | -0.0045 | -2.5  | 9.99 | 150020.8 | 9.11  | HUMAN | E7E020 | Actin                                                                        |
| 20712 | dirMS_041712_NAR_60mM_plus2.1946.1946.3    | 2 | 5.42 | 1.350E+04       | (R)IQSIVAM (K)E L V/A/M/A/P/E E L R/A (R)                | 174.5  | 579.9662 | 1791.979 | -0.0045 | -2.5  | 9.99 | 150020.8 | 9.11  | HUMAN | E7E020 | Actin                                                                        |
| 20713 | dirMS_041712_NAR_60mM_plus2.5657.5657.3    | 3 | 5.42 | 1.153E+05 M131m | (R)IQMGQR (R)Q (V)G/Q (D)A/Y Q Q R (L)                   | 87.98  | 499.8808 | 1481.662 | -0.0026 | -1.6  | 8.75 | 59342.13 | 6.44  | HUMAN | P15242 | Desmoglein                                                                   |
| 20714 | dirMS_041712_NAR_120mM_minus.11045.11045.3 | 3 | 5.41 | 1.183E+05       | (R)RNEILDR (R) R E L V/D (E)S/A/R (D)                    | 114.83 | 415.5534 | 1244.659 | -0.0137 | -11   | 4.68 | 9664.9   | 6.13  | HUMAN | QBUMU4 | Programmed cell death 6-interacting protein                                  |
| 20715 | dirMS_041712_NAR_120mM_minus.14906.14906.3 | 3 | 5.41 | 1.269E+05       | (K)KKKLEEK (K) K E L E E V/A (V)P/A (V)S/L (K)           | 135.13 | 551.9968 | 1653.978 | -0.0027 | -1.6  | 6.23 | 72445.7  | 5.07  | HUMAN | P11021 | 78 kDa cytosolic-regulated protein                                           |
| 20716 | dirMS_041712_NAR_120mM_minus.9940.9940.3   | 3 | 5.41 | 1.451E+04       | (R)ITFHEKA (R)T F K/E I/G A/V S (K)                      | 87.95  | 404.2122 | 1162.625 | -0.0016 | -1.3  | 8.41 | 25538.6  | 9.3   | HUMAN | BJAE1E | General transcription factor III (Fragment)                                  |
| 20717 | dirMS_041712_NAR_20mM_minus.1125.1125.2    | 2 | 5.41 | 0.277E+05       | (K)SLELEA (K)S L E V/A (L)A (R) (K)                      | 115.4  | 565.3131 | 1129.624 | -0.0026 | -1.6  | 8.75 | 27033.1  | 5.51  | HUMAN | Q71252 | Keratin, type I cytoskeletal 8                                               |
| 20718 | dirMS_041712_NAR_20mM_minus.12391.12391.3  | 3 | 5.41 | 0.202E+03       | (R)IVPTAN (R) P V T A N V S/V V/D U/T C/R (L)            | 171.53 | 510.9357 | 1530.795 | -0.0019 | -1.2  | 5.81 | 31718.5  | 7.17  | HUMAN | E7U1T4 | Glyceraldehyde-3-phosphate dehydrogenase                                     |
| 20719 | dirMS_041712_NAR_50mM_minus.6126.6126.2    | 2 | 5.41 | 0.356E+04       | (K)JAGFAGC (K)A G F I A/G (D) P A R (R)                  | 97.78  | 488.7293 | 976.448  | -0.003  | 3.1   | 4.21 | 123097.1 | 5.83  | HUMAN | ASAE30 | POTE ankyrin domain family member F                                          |
| 20720 | dirMS_041712_NAR_60mM_minus.1127.1127.3    | 3 | 5.41 | 1.889E+05       | (R)FPGQHA (R)T F P/G (L)N/A/D (R) (K)                    | 122.05 | 420.2346 | 1258.69  | -0.0011 | -0.8  | 8.75 | 42330.8  | 4.77  | HUMAN | ABN828 | Putative tubulin beta chain-like protein ENSP0000290377                      |
| 20721 | dirMS_041712_NAR_60mM_minus.1427.1427.3    | 3 | 5.41 | 0.885E+05       | (K)KAGTLV (K)A L G/T V S/V H T R (L) (K)                 | 139.2  | 422.9139 | 1262.753 | -0.0131 | -10.3 | 1.9  | 29514.9  | 7.4   | HUMAN | Q52166 | Translational activator GCN1                                                 |
| 20722 | dirMS_041712_NAR_60mM_minus.18220.18220.3  | 3 | 5.41 | 0.873E+03       | (K)EFSHAR (K)E F S H /A L/T I (K) (K)                    | 162.55 | 435.9153 | 1305.72  | -0.0012 | 8.6   | 6.85 | 54978.6  | 6.16  | HUMAN | P10619 | Lysosomal protective protein                                                 |
| 20723 | dirMS_041712_NAR_120mM_plus.7981.7981.4    | 4 | 5.41 | 1.894E+05       | (K)VLATVTV (K)Q L V A/T V T K P V G G D K N G G T/R (V)  | 95.88  | 443.251  | 1769.887 | -0.0047 | -2.6  | 9.99 | 12738    | 10.72 | HUMAN | BWV811 | 60S ribosomal protein L6 (Fragment)                                          |
| 20724 | dirMS_041712_NAR_20mM_plus.10446.10446.2   | 2 | 5.41 | 1.104E+05       | (K)GVSPSP (K)Q V (I)S P D S G G L/P E R (S)              | 144.55 | 677.8458 | 1354.696 | -0.0118 | -8.7  | 4.37 | 73399.3  | 10.82 | HUMAN | Q92945 | Far upstream element-binding protein 2                                       |
| 20725 | dirMS_041712_NAR_20mM_plus.11409.11409.2   | 2 | 5.41 | 0.237E+05       | (K)NGVLDV (K)V G L Q/V V/A A/V (K) (K)                   | 151.22 | 456.7977 | 912.588  | -0.0004 | 0.5   | 8.72 | 61234.7  | 5.7   | HUMAN | P10809 | 60 kDa heat shock protein, mitochondrial                                     |
| 20726 | dirMS_041712_NAR_20mM_plus.14428.14428.2   | 2 | 5.41 | 0.732E+04 M23m  | (R)ISQNMN (R)S Q M/V m A A S I A N V (K) (K)             | 170.52 | 766.9048 | 1516.815 | -0.0091 | -5.1  | 8.47 | 47423    | 5.43  | HUMAN | E7E6F2 | T-complex protein 1 subunit alpha                                            |
| 20727 | dirMS_041712_NAR_20mM_plus.8015.8015.2     | 2 | 5.41 | 0.421E+05 M239m | (K)EJVEQD (K)E/V D (E) N/L/M/V D N (K) (K)               | 125.1  | 731.8435 | 1446.689 | -0.0094 | -3.1  | 4.14 | 40069.4  | 4.83  | HUMAN | E7E7R1 | Tubulin beta chain                                                           |
| 20728 | dirMS_041712_NAR_20mM_plus.9153.9153.2     | 2 | 5.41 | 0.111E+05       | (R)IGVSTTTR (R)G V S/P T/T T A E R (E)                   | 133.87 | 566.7715 | 1132.527 | -0.0088 | 7.8   | 6    | 23901.9  | 5.28  | HUMAN | L3U129 | Actin, cytoplasmic 2, N-terminally processed (Fragment)                      |
| 20729 | dirMS_041712_NAR_30mM_plus.15763.15763.2   | 2 | 5.41 | 0.453E+05       | (K)LLYNNY (K) L V T N/V N/V S/N F G (R) (K)              | 160.07 | 648.8354 | 1296.67  | -0.0066 | -4.6  | 8.75 | 71165.3  | 5.77  | HUMAN | JK513  | Claflarin heavy chain 1                                                      |
| 20730 | dirMS_041712_NAR_30mM_plus2.18565.18565.2  | 2 | 5.41 | 0.755E+05       | (K)EAVM (K)A V M/V D/V R Q/G (K) (K)                     | 159.98 | 531.7539 | 1022.494 | -0.0084 | -6.2  | 4.21 | 5374.2   | 6.54  | HUMAN | Q52166 | RNA-binding protein FUS                                                      |
| 20731 | dirMS_041712_NAR_30mM_plus2.18952.18952.2  | 2 | 5.41 | 0.230E+05       | (K)IQEWMN (K)Q L/W (N)A/G D D T (K) (K)                  | 152.73 | 715.866  | 1430.727 | -0.0027 | -1.9  | 4.21 | 107550.2 | 5.34  | HUMAN | P45588 | Alanine- <i>t</i> -RNA ligase, cytoplasmic                                   |
| 20732 | dirMS_041712_NAR_30mM_plus2.5870.5870.2    | 2 | 5.41 | 0.138E+05       | (R)IAEEVNER (R)E A/E V/V R (R)                           | 85.32  | 448.2113 | 895.416  | -0.0003 | 0.3   | 4.25 | 54793.4  | 10.51 | HUMAN | B724Q3 | Putative RNA-binding protein Luc7-like 2                                     |
| 20733 | dirMS_041712_NAR_30mM_plus2.5896.5896.2    | 2 | 5.41 | 0.428E+05       | (K)MIYASS (K)M I/Y A S/S (K) (K)                         | 85.65  | 400.2035 | 799.402  | -0.0021 | -2.7  | 8.34 | 22956    | 8.8   | HUMAN | EPK2C5 | Cofilin-1                                                                    |
| 20734 | dirMS_041712_NAR_30mM_plus2.8832.8832.2    | 2 | 5.41 | 0.251E+05       | (R)IYVY (R)I Y V/V (V)F (L) (K) (K)                      | 99.85  | 405.211  | 809.411  | -0.0025 | -2.1  | 8.75 | 1192.58  | 6.22  | HUMAN | Q92945 | Diphosphoaminoacyltransferase-like protein 6                                 |
| 20735 | dirMS_041712_NAR_40mM_plus2.17034.17034.3  | 3 | 5.41 | 1.226E+05       | (K)VIYATM (K)I V A A/T N V D L I P D L L A R (S)         | 167.6  | 617.3636 | 1805.086 | -0.0096 | -5.2  | 5.93 | 32827.5  | 5.92  | HUMAN | EPK2C5 | 26S proteasome regulatory subunit 6A (Fragment)                              |
| 20736 | dirMS_041712_NAR_50mM_plus.11291.11291.3   | 3 | 5.41 | 1.298E+05       | (R)IETGVD (R)T E/G V D L T K D X Q M/V (Q)R (V)          | 127.18 | 564.2856 | 1690.843 | -0.0006 | -0.4  | 5.66 | 73964.5  | 5.87  | HUMAN | P38646 | Stress-70 protein, mitochondrial                                             |
| 20737 | dirMS_041712_NAR_120mM_minus.15369.15369.3 | 3 | 5.4  | 2.103E+05 M214m | (K)IGDQGA (K)D G G G A M G S P G L H G G P G A K E G (K) | 133.24 | 641.9706 | 1907.903 | -0.0094 | -6.3  | 6.75 | 49965.6  | 8.8   | HUMAN | ABN4H0 | Otolin-1                                                                     |
| 20738 | dirMS_041712_NAR_120mM_minus.1458.1458.3   | 3 | 5.41 | 0.214E+05       | (K)QDVDFG (K)K V S/V S/P F (K) (K) (K)                   | 107.57 | 528.2362 | 1037.547 | -0.0027 | -1.6  | 8.75 | 1192.58  | 6.22  | HUMAN | EPK10D | Epiplexin                                                                    |
| 20739 | dirMS_041712_NAR_50mM_minus.5201.5201.3    | 3 | 5.4  | 1.588E+04       | (K)EEAGKES (K)E A/G S/S V/T A E A K K (F)                | 87.22  | 508.2436 | 1522.723 | -0.0069 | -4.5  | 4.49 | 83273.6  | 5.55  | HUMAN | P13100 | 3'-5' UTR repair cross-complementing protein                                 |
| 20740 | dirMS_041712_NAR_60mM_minus.11136.11136.3  | 3 | 5.4  | 1.222E+05 M183m | (R)IYVEVDR (R)I V E/R D N/V A (D) M (R) (K)              | 122.3  | 568.949  | 1688.827 | -0.0099 | -1.2  | 4.18 | 4709.6   | 5.19  | HUMAN | BOY1CA | Vimentin                                                                     |
| 20741 | dirMS_041712_NAR_60mM_minus.12112.112.3    | 3 | 5.4  | 1.256E+05       | (R)ILGIFGE (R) L I/G I F/E G N D Q R (K) (K)             | 127.93 | 487.5978 | 1460.786 | -0.0068 | -4.6  | 6.07 | 20662    | 6     | HUMAN | Q9NZ19 | Isomorph 2 of Diphosphoaminoacyl polyphosphate phosphatase 2                 |
| 20742 | dirMS_041712_NAR_60mM_minus.12444.12444.4  | 4 | 5.4  | 0.181E+04       | (R)INLDRE (R)N L D R E P T Y T Y N L/N (L)               | 130.48 | 490.4748 | 1718.882 | -0.0047 | -2.7  | 6.07 | 49012.3  | 4.9   | HUMAN | ABMU01 | Tubulin alpha-4A chain                                                       |
| 20743 | dirMS_041712_NAR_60mM_minus.5095.5095.3    | 3 | 5.4  | 1.369E+05       | (K)KTSQSG (K)K T S/Q S/G S/P A G G V D S T A K (K)       | 83.02  | 529.6245 | 1586.813 | -0.0057 | -4.9  | 10   | 45232    | 5.78  | HUMAN | B4D2P4 | Cytosolic dynein 1 light intermediate chain 2                                |
| 20744 | dirMS_041712_NAR_20mM_plus.11102.11102.2   | 2 | 5.4  | 0.972E+04 M195m | (K)IDASTIA (K)A S T I/A/G/L N/V (R) (K)                  | 148.75 | 617.3237 | 1217.631 | -0.0094 | 11.8  | 5.84 | 72445.7  | 5.07  | HUMAN | P11021 | 78 kDa cytosolic-regulated protein                                           |
| 20745 | dirMS_041712_NAR_20mM_plus.13017.13017.2   | 2 | 5.4  | 0.233E+04       | (K)IAVDSV (K)I A V D S /L V/P P (D) (K)                  | 162.43 | 513.8007 | 1026.594 | -0.0041 | -0.1  | 5.88 | 48851.3  | 9.2   | HUMAN | K7E63  | ATP synthase subunit alpha, mitochondrial                                    |
| 20746 | dirMS_041712_NAR_30mM_plus.18811.18811.2   | 2 | 5.4  | 0.129E+05       | (R)IFLQV (R)I F/L Q V (R) (K)                            | 201.5  | 447.7765 | 894.545  | 0.0011  | 1.1   | 8.75 | 72118.8  | 6.3   | HUMAN | A7Y18  | Radixin                                                                      |
| 20747 | dirMS_041712_NAR_20mM_minus.8878.8878.2    | 2 | 5.4  | 0.045E+05       | (R)IYVY (R)I Y V/V (V)F (L) (K) (K)                      | 131.55 | 402.211  | 809.411  | -0.0025 | -2.1  | 8.75 | 1192.58  | 6.22  | HUMAN | Q92945 | Diphosphoaminoacyltransferase-like protein 6                                 |
| 20748 | dirMS_041712_NAR_30mM_plus2.4819.4819.2    | 2 | 5.4  | 0.818E+05       | (R)IMFGYD (R)I M F/G Y D M (K) (K)                       | 76.82  | 426.6906 | 852.37   | 0.0037  | 4.3   | 5.75 | 77799.7  | 9.09  | HUMAN | PS2272 | Heterogeneous nuclear ribonucleoprotein M                                    |
| 20749 | dirMS_041712_NAR_30mM_plus2.4846.4846.2    | 2 | 5.4  | 0.430E+05       | (R)IMDYO (R)I M/D Y D (R) C (R)                          | 96.88  | 430.1579 | 859.307  | 0.0012  | 1.4   | 4.21 | 13246.4  | 9.21  | HUMAN | Q5Y17  | Nuclear receptor coactivator 5 (Fragment)                                    |
| 20750 | dirMS_041712_NAR_40mM_plus2.6110.6110.2    | 2 | 5.4  | 0.566E+04       | (R)IQAPFT (R)I Q A/P F T N T R (K)                       | 74.58  | 474.2383 | 947.469  | 0       | 0     | 9.75 | 56491.1  | 7.78  | HUMAN | B4D7Q2 | Elongation factor 1-gamma                                                    |
| 20751 | dirMS_041712_NAR_50mM_plus2.14919.14919.3  | 3 | 5.4  | 0.127E+05 S833  | (R)IQVDFG (R)I Q V D/F G P Q L/V P F (K) (K)             | 147.1  | 470.9293 | 1414.774 | -0.0021 | -0.4  | 6.75 | 37936    | 9.31  | HUMAN | Q9H853 | Putative tubulin-like protein alpha-4B                                       |
| 20752 | dirMS_041712_NAR_50mM_plus2.18044.18044.3  | 3 | 5.4  | 1.452E+05       | (R)IASHQA (K)S A/H Q/A Q/V S/L G L/P T G L G R (S)       | 162.68 | 643.6959 | 1923.077 | -0.0039 | -2.9  | 9.64 | 266161   | 5.68  | HUMAN | EP91P0 | Epiplexin                                                                    |
| 20753 | dirMS_041712_NAR_50mM_plus2.18824.18824.3  | 3 | 5.4  | 4.202E+05       | (R)IAGLQSG (R)I A/G L/S/Q/V S/L V/L V/H P L V S (R) (K)  | 167.15 | 617.3412 | 1850.013 | -0.0024 | -0.2  | 6.79 | 73325.2  | 9.19  | HUMAN | F5H2A9 | Very long-chain-specific acyl-CoA dehydrogenase, mitochondrial               |
| 20754 | dirMS_041712_NAR_50mM_plus2.7680.7680.3    | 3 | 5.4  | 1.600E+04       | (K)SLEATA (K)S A/E V/A A E A T/K M N E/A G A G R (A)     | 106.47 | 578.9478 | 1734.807 | -0.0213 | -12.3 | 4.78 | 59288.4  | 7.16  | HUMAN | Q3LXA3 | Bifunctional ATP-dependent dihydroxyacetone kinase/FAD-AMP lyase (cyclizing) |
| 20755 | dirMS_041712_NAR_50mM_plus.15991.15991.3   | 3 | 5.4  | 0.219E+04       | (K)SLTDNA (K)S L T/D N V/D E/D H A V (R) (K)             | 140.35 | 509.919  | 1527.744 | -0.0014 | -0.9  | 4.53 | 85057.6  | 4.94  | HUMAN | PO7900 | Heat shock protein HSP 90-alpha                                              |
| 20756 | dirMS_041712_NAR_50mM_plus2.7327.7327.3    | 3 | 5.4  | 0.938E+05       | (K)SLEATA (K)S A/E V/A A E A T/K M N E/A G A G R (A)     | 106.48 | 580.9185 | 1530.697 | -0.0026 | -1.6  | 8.75 | 37936    | 9.31  | HUMAN | F7E771 |                                                                              |

|       |                                           |      |                   |                                                 |        |          |          |         |      |      |          |       |       |        |                                                                                                              |
|-------|-------------------------------------------|------|-------------------|-------------------------------------------------|--------|----------|----------|---------|------|------|----------|-------|-------|--------|--------------------------------------------------------------------------------------------------------------|
| 20815 | dirMS_041712_NAR_20mM_plus.16661.16661.3  | 5.37 | 0.221E+05         | (K)VQIAA (K) Q/V/A/A/V/A/A/Q/L/LQ/R(M)          | 186.37 | 518.2975 | 1552.881 | -0.0026 | -1.7 | 5.97 | 10728.1  | 9.15  | HUMAN | Q9Y5L4 | Mitochondrial import inner membrane translocase subunit Tim13                                                |
| 20816 | dirMS_041712_NAR_20mM_plus.17339.17339.2  | 5.37 | 0.891E+04         | (R)IAVAIEA (R) I/A/V/A/E/A/M/P/D/V/S/15/R(N)    | 189.08 | 70.9764  | 1740.949 | -0.0035 | -2   | 4.37 | 33022.6  | 4.78  | HUMAN | ABN029 | Protein RPSA58                                                                                               |
| 20817 | dirMS_041712_NAR_20mM_plus.18882.18882.2  | 5.37 | 0.253E+05         | (R)IAFAAL (R) I/A/V/E/A/L/S/V/D/G/D/L/A/G/R(N)  | 200.58 | 791.2459 | 1589.029 | -0.0027 | -4.8 | 2.84 | 15680.7  | 6.72  | HUMAN | Q9Y5L4 | Creative kinase B-type 1 (Fragment)                                                                          |
| 20818 | dirMS_041712_NAR_20mM_plus.7091.7091.12   | 5.37 | 0.182E+05 M35m    | (R)IEFM02 (R) V/E/I/P/V/D/O T/R(S)              | 115.75 | 558.233  | 1099.473 | -0.0059 | -1.8 | 4.03 | 7898     | 11.1  | HUMAN | PE2857 | 40S ribosomal protein S28                                                                                    |
| 20819 | dirMS_041712_NAR_20mM_plus.7990.7990.3    | 5.37 | 0.452E+05 M239m   | (K)VEDE03 (K) V/D/E/Q/Vm/L/V/Q/N(K)N            | 125.12 | 488.2328 | 1446.689 | -0.0045 | -0.3 | 4.14 | 40069.4  | 4.83  | HUMAN | AT7691 | Tubulin beta chain                                                                                           |
| 20820 | dirMS_041712_NAR_30mM_plus.12886.12886.2  | 5.37 | 0.340E+05         | (R)ILVVTD (R) L/V/V/T/D/P/R(A)                  | 120.38 | 456.779  | 912.551  | -0.0006 | -0.6 | 5.84 | 33022.6  | 4.78  | HUMAN | ABN029 | Protein RPSA58                                                                                               |
| 20821 | dirMS_041712_NAR_30mM_plus.16560.16560.2  | 5.37 | 0.430E+05         | (K)ISGDFE (K) S/I/S/L/P/Q/P/K(Q)K               | 140.49 | 637.8936 | 1311.604 | 0.0009  | -0.7 | 5.83 | 33029.7  | 5.11  | HUMAN | Q9U4J6 | Protein RPSA58                                                                                               |
| 20822 | dirMS_041712_NAR_40mM_plus.16091.16091.3  | 5.37 | 1.798E+04 M340m   | (R)IAUETG (R) I/A/L/G/T/E/V/L/Q/P/P/K/G/V(N)K   | 161.12 | 650.0097 | 1932.026 | -0.0086 | -3.2 | 6.18 | 61784.7  | 9.24  | HUMAN | Q5S831 | Apoptosis-inducing factor 1, mitochondrial                                                                   |
| 20823 | dirMS_041712_NAR_40mM_plus.19534.19534.3  | 5.37 | 0.106E+06         | (R)IGLAVP (R) G/L/A/P/V/Q/Y/A/L/H/P/G/M(K)K     | 183.65 | 583.3378 | 1748.011 | -0.0117 | -6.7 | 6.74 | 58266.4  | 9.46  | HUMAN | BADN00 | Pyruvate carboxylase, mitochondrial                                                                          |
| 20824 | dirMS_041712_NAR_40mM_plus.5288.5288.2    | 5.37 | 0.885E+04         | (K)GSSNSY (K) G/S/N/S/A/V(K)K                   | 87.32  | 463.7315 | 926.458  | -0.0021 | -2.2 | 8.59 | 23042.2  | 9.95  | HUMAN | PA6782 | 40S ribosomal protein S5                                                                                     |
| 20825 | dirMS_041712_NAR_40mM_plus.9095.9095.2    | 5.37 | 0.554E+05         | (K)ISSFDS (K) S/I/P/P/S/A/V(K)K                 | 116.22 | 423.1935 | 845.379  | 0.0009  | -1.1 | 5.55 | 15011.5  | 6.72  | HUMAN | BADL40 | ATP-dependent RNA helicase DDX3X                                                                             |
| 20826 | dirMS_041712_NAR_50mM_plus.17125.17125.3  | 5.37 | 1.477E+05 T129t   | (R)IEESTY (R) E/T/V/L/Y/L/S/V/L/R(I)            | 116.22 | 615.4879 | 179.9469 | -0.0029 | -1.6 | 6.24 | 81006.8  | 6.72  | HUMAN | Q9Y5L4 | Transmembrane protein 118                                                                                    |
| 20827 | dirMS_041712_NAR_50mM_plus.19392.19392.3  | 5.37 | 1.222E+05         | (K)SGVGS (K) G/S/V/N/S/P/R/L/E/L/E/T/N(R)       | 117.32 | 630.0135 | 1888.029 | -0.0027 | -1.9 | 5.87 | 53461.2  | 6.87  | HUMAN | Q1Z624 | Coiled-coil domain-containing protein                                                                        |
| 20828 | dirMS_041712_NAR_50mM_plus.9161.9161.3    | 5.37 | 1.191E+05         | (K)ITAVEA (K) T/A/V/E/A/H/T/D/E/L/A(K)K         | 110.42 | 594.9238 | 1512.754 | -0.0028 | -1.5 | 4.31 | 288852.1 | 5.33  | HUMAN | E9PEM5 | Lipopolysaccharide-responsive and beige-like anchor protein                                                  |
| 20829 | dirMS_041712_NAR_60mM_plus.13270.13270.3  | 5.37 | 0.761E+05 M11m    | (j)mvNHFU (j) m V/N/H/A/E/E(K)K                 | 105.87 | 417.8778 | 1238.624 | 15.9947 | -0.2 | 6.5  | 45508.6  | 5.5   | HUMAN | AKR702 | Heat shock cognate 71 kDa protein                                                                            |
| 20830 | dirMS_041712_NAR_60mM_plus.19459.19459.3  | 5.37 | 1.631E+05         | (K)DQNGN (K) D/N/Q/A/P/S/V/S/V/T/P(R)G          | 161.08 | 566.0337 | 1698.877 | -0.0028 | -4.8 | 5.96 | 46335.9  | 6.23  | HUMAN | ETC049 | TRAF family member-associated NF-kappa-B activator                                                           |
| 20831 | dirMS_041712_NAR_120mM_minus.9626.9626.3  | 5.36 | 0.438E+05         | (K)IQEYDS (K) Q/E/Y/D/S/G/P/S/V(H)R(K)          | 107.47 | 506.2424 | 1156.703 | 0.001   | 6.6  | 4.65 | 123097.1 | 5.83  | HUMAN | ASAE02 | POTE ankyrin domain family member F                                                                          |
| 20832 | dirMS_041712_NAR_20mM_minus.11858.11858.2 | 5.36 | 0.125E+05 M98m    | (R)ITNVDT (R) I/T/V/N/D/T/G/G/M/T(N)A(K)        | 167.03 | 683.3669 | 1349.735 | -0.0022 | -2.1 | 5.5  | 20151.2  | 4.58  | HUMAN | GV3218 | Heat shock protein HSP 90-alpha (Fragment)                                                                   |
| 20833 | dirMS_041712_NAR_20mM_minus.3051.31051.3  | 5.36 | 0.267E+04 M73m    | (R)IAUVDL (R) I/A/V/D/L/E/P/G/T/D/S/V(R)S)      | 181.62 | 544.6138 | 1615.836 | -0.0099 | -2.5 | 4.03 | 27549.9  | 4.39  | HUMAN | EP8B14 | Tubulin beta chain                                                                                           |
| 20834 | dirMS_041712_NAR_40mM_minus.11672.11672.3 | 5.36 | 1.475E+04         | (R)QVFAE (R) Q/V/A/E/A/L/S/V/D/G/D/L/A/G/R(N)   | 152.53 | 636.0167 | 1906.043 | -0.0077 | -4.1 | 8.59 | 32005.8  | 5.88  | HUMAN | CSH19  | Cathepsin D light chain (Fragment)                                                                           |
| 20835 | dirMS_041712_NAR_40mM_minus.15140.15140.3 | 5.36 | 0.746E+05         | (R)IAUVEU (K) I/A/V/E/U/Q/P/L/A/E/H/D/A(R)R     | 175.3  | 601.0146 | 1801.033 | -0.0038 | -2.1 | 5.4  | 53506.8  | 5.83  | HUMAN | PZ3381 | Tryptophan-tRNA ligase, cytoplasmic                                                                          |
| 20836 | dirMS_041712_NAR_40mM_minus.5749.5749.2   | 5.36 | 1.906E+04         | (R)IYSGGN (R) I/S/G/G/N/R/D/N(Y)M(K)            | 95.47  | 719.2874 | 1437.567 | 0.001   | 0.7  | 4.21 | 17170.1  | 8.86  | HUMAN | P98179 | Putative RNA-binding protein                                                                                 |
| 20837 | dirMS_041712_NAR_40mM_minus.6367.6367.2   | 5.36 | 0.162E+05         | (R)IAQDVL (R) I/A/Q/D/V/L/A/R(K)                | 102.23 | 483.2366 | 965.469  | -0.0028 | -2.9 | 4.37 | 43773.3  | 5.26  | HUMAN | F8V279 | Keratin, type I cytoskeletal 18                                                                              |
| 20838 | dirMS_041712_NAR_40mM_minus.7825.7825.3   | 5.36 | 0.749E+04 M47m    | (K)IGTQAG (K) G/T/G/A/M/N/S/V/m/P/F/Q(M)K(S)    | 123.67 | 646.9867 | 1906.955 | -0.0098 | -0.5 | 8.46 | 8797.3   | 9.3   | HUMAN | H83800 | V-type protein ATPase 16 kDa proteolipid subunit                                                             |
| 20839 | dirMS_041712_NAR_40mM_minus.8758.8758.3   | 5.36 | 1.630E+05         | (K)QDVEK (K) Q/D/V/E/A/Y/M/K/V/E/L(K)K          | 134.07 | 599.847  | 1797.832 | -0.0037 | -3.3 | 4.18 | 13588.1  | 4.66  | HUMAN | F8W927 | Keratin, type I cytoskeletal 8 (Fragment)                                                                    |
| 20840 | dirMS_041712_NAR_50mM_minus.14845.14845.3 | 5.36 | 1.185E+05         | (R)ILLTGT (R) L/L/T/T/G/V/D/V/E/L(K)K           | 152.48 | 498.2708 | 1492.826 | -0.0009 | -0.6 | 4.56 | 98882.1  | 4.86  | HUMAN | CSJF13 | Eukaryotic translation initiation factor 4 gamma 1 (Fragment)                                                |
| 20841 | dirMS_041712_NAR_60mM_minus.11930.11930.3 | 5.36 | 0.151E+05         | (R)IDAYSG (R) I/D/A/Y/S/G/A/V/N/I/E/R(K)        | 126.38 | 507.9181 | 1521.745 | -0.0047 | -6.1 | 6.74 | 17952.8  | 6.73  | HUMAN | EP9AV2 | Proteasome subunit beta-type-5                                                                               |
| 20842 | dirMS_041712_NAR_60mM_minus.16189.16189.3 | 5.36 | 1.139E+05         | (K)AGTQV (K) K/A/G/T/Q/V/E/D/F/R/D/G(K)K        | 149.6  | 640.2818 | 1920.931 | 0.001   | 0.6  | 4.11 | 98972.5  | 4.85  | HUMAN | FG5052 | Alpha-actinin-4                                                                                              |
| 20843 | dirMS_041712_NAR_20mM_plus.1312.1312.2    | 5.36 | 1.103E+05         | (K)IAGTQ (K) I/A/G/T/Q/V/E/D/F/R/D/G(K)K        | 149.6  | 640.2818 | 1920.931 | 0.001   | 0.6  | 4.11 | 98972.5  | 4.85  | HUMAN | FG5052 | Alpha-actinin-4                                                                                              |
| 20844 | dirMS_041712_NAR_30mM_plus.12654.12654.2  | 5.36 | 0.916E+04         | (K)KACVW (K) K/A/C/V/W/V/L/V/R(R)G              | 118.73 | 526.2726 | 1051.535 | 0.0026  | 2.5  | 8.75 | 9782.1   | 4.7   | HUMAN | PK2260 | Small nuclear ribonucleoprotein D0                                                                           |
| 20845 | dirMS_041712_NAR_30mM_plus.13494.13494.2  | 5.36 | 0.180E+06         | (K)IYFMAA (K) Y/I/F/M/A/S/G/S/R(K)              | 125.02 | 516.2597 | 1031.498 | 0.0142  | 13.8 | 8.75 | 92752.5  | 4.76  | HUMAN | EP2059 | Endoplasmic                                                                                                  |
| 20846 | dirMS_041712_NAR_40mM_plus.10980.10980.3  | 5.36 | 0.957E+04 M35m    | (K)AASDA (K) A/A/S/D/A/M/T/L/E/P/T/H/P(I)R      | 130.82 | 612.652  | 1819.937 | -0.0044 | -5.1 | 5.32 | 12926.1  | 4.4   | HUMAN | Q7E420 | 14-3-3 protein epsilon (Fragment)                                                                            |
| 20847 | dirMS_041712_NAR_40mM_plus.12727.12727.3  | 5.36 | 0.102E+05         | (K)IDVTFK (K) I/D/V/T/F/K/S/G/P/P/V/T/G(K)D     | 102.16 | 481.2551 | 1219.625 | -0.0044 | -3.2 | 8.59 | 58855.9  | 6.73  | HUMAN | Q11322 | Lipid-modified cytoskeleton component of branched-chain alpha-keto acid dehydrogenase complex, mitochondrial |
| 20848 | dirMS_041712_NAR_40mM_plus.6841.6841.2    | 5.36 | 0.102E+04         | (K)YTCFSFC (K) Y/T/C/S/F/C/K(T)K                | 100.23 | 511.7046 | 1022.407 | -0.0051 | -5.5 | 8.59 | 10867.7  | 10.82 | HUMAN | AKNH3  | Putative 60S ribosomal protein L37c-like                                                                     |
| 20849 | dirMS_041712_NAR_40mM_plus.7017.7017.2    | 5.36 | 0.157E+05 M14m S4 | (j)mvS4R (j) m V/S4/R(K)                        | 100.97 | 429.7019 | 639.228  | -0.0088 | -7.1 | 9.5  | 103463.7 | 5.03  | HUMAN | Q9Y513 | Protocadherin alpha-1                                                                                        |
| 20850 | dirMS_041712_NAR_40mM_plus.9134.9134.2    | 5.36 | 0.969E+04         | (R)ILSYEA (R) I/L/S/Y/E/A/R(K)                  | 116.07 | 426.2316 | 851.462  | -0.0022 | -7.3 | 6    | 26616.1  | 5.68  | HUMAN | EP9PU0 | Epiplakin                                                                                                    |
| 20851 | dirMS_041712_NAR_40mM_plus.9752.9752.2    | 5.36 | 0.901E+04         | (R)IYFSEB (R) I/Y/F/S/E/B/R/W/N/R(K)            | 121.47 | 566.7355 | 1132.473 | -0.0091 | -8   | 4.53 | 53378.8  | 5.74  | HUMAN | Q15149 | Plectin                                                                                                      |
| 20852 | dirMS_041712_NAR_50mM_plus.14192.14192.3  | 5.36 | 1.224E+05         | (R)IAUVAE (R) I/A/U/V/A/E/D/Q/L/R/D/E/D/L/R(K)R | 142.62 | 646.3532 | 1937.045 | -0.003  | -1.6 | 4.56 | 118390.9 | 6.49  | HUMAN | Q22314 | Ubiquitin-like modifier-activating enzyme 1                                                                  |
| 20853 | dirMS_041712_NAR_50mM_plus.8557.8557.3    | 5.36 | 1.216E+04         | (R)IAIDSS (R) I/A/I/D/S/S/N/L/K/D/O/V/S/T/A(R)R | 111.88 | 595.2868 | 1783.846 | 0.0002  | 0.1  | 4.43 | 46656.7  | 9.19  | HUMAN | Q5V7F3 | PC domain-containing protein 2                                                                               |
| 20854 | dirMS_041712_NAR_60mM_plus.16188.16188.3  | 5.36 | 1.112E+06         | (K)ITDKLV (K) I/T/D/K/L/V/L/V/L/M/G(K)K         | 114.04 | 406.908  | 1218.713 | -0.0032 | -2.6 | 8.26 | 11504.1  | 9.57  | HUMAN | Q7E444 | Profilin 1, isoform CRA_b                                                                                    |
| 20855 | dirMS_041712_NAR_60mM_plus.19169.19169.3  | 5.36 | 0.502E+04         | (K)IVSLLG (K) I/V/S/L/L/G/V/N/I/V/T/F(R)G       | 159.5  | 524.6233 | 1571.854 | 0.0013  | 0.8  | 6.71 | 22783.5  | 5.5   | HUMAN | PS3579 | Myosin-9                                                                                                     |
| 20856 | dirMS_041712_NAR_120mM_plus.19343.19343.3 | 5.36 | 0.276E+05         | (K)IYFVPL (K) I/Y/F/V/P/L/S/G/P/P/V/T/G(K)D     | 119.21 | 411.5515 | 1231.625 | -0.0015 | -6.4 | 4.21 | 4115.4   | 6.65  | HUMAN | Q9Y513 | Protocadherin gamma (Fragment)                                                                               |
| 20857 | dirMS_041712_NAR_20mM_plus.14486.14486.2  | 5.36 | 0.582E+04         | (K)ILAAEL (K) I/L/A/A/E/L/S/V/T/P/Q/A/A/T/A(R)R | 108.88 | 843.955  | 1686.902 | 0.0006  | 0.4  | 4.5  | 558007.1 | 5.44  | HUMAN | PSF017 | Epiplakin                                                                                                    |
| 20858 | dirMS_041712_NAR_20mM_minus.14694.14694.2 | 5.35 | 0.962E+04         | (K)IYVDDG (K) Y/V/D/D/G/L/S/J/L/Q/V(K)K         | 201.6  | 731.9104 | 1462.815 | -0.0016 | -1.1 | 4.21 | 30947.9  | 6.47  | HUMAN | H8Q334 | Pyruvate kinase                                                                                              |
| 20859 | dirMS_041712_NAR_50mM_plus.13750.13750.3  | 5.35 | 1.128E+05         | (K)IKNLVTA (K) I/K/N/L/V/T/A/V/P/P/L/V(K)K      | 147.07 | 432.9468 | 1296.825 | 0.0009  | 0.7  | 10   | 11462.8  | 5.18  | HUMAN | IL3286 | Thioredoxin domain-containing protein 17                                                                     |
| 20860 | dirMS_041712_NAR_50mM_plus.15076.15076.3  | 5.35 | 0.150E+05         | (R)ISVSHG (R) I/S/V/S/H/G/S/V/V/V/V/V/T/A/A(K)K | 142.28 | 617.8619 | 1879.088 | -0.0015 | -4.7 | 5.4  | 24827.2  | 7.21  | HUMAN | HN9P07 | Alanine-tRNA ligase, cytoplasmic (Fragment)                                                                  |
| 20861 | dirMS_041712_NAR_50mM_plus.16387.16387.3  | 5.35 | 1.541E+04         | (K)SILVAAL (K) S/I/L/V/A/L/L/E/L/E/Q/S(K)K      | 161.32 | 559.2917 | 1675.857 | 0.0034  | -2   | 4.32 | 18679.2  | 5.61  | HUMAN | BADWV1 | ADP-ribosyl-transferase protein 1                                                                            |
| 20862 | dirMS_041712_NAR_50mM_plus.17693.17693.3  | 5.35 | 1.00E+05          | (K)ITJLNV (K) I/T/J/L/N/V/L/T/L/Q/H/S(K)K       | 169.97 | 554.3024 | 1660.891 | 0.0022  | 1.3  | 6.41 | 42238.2  | 4.88  | HUMAN | BADNG9 | COBw domain-containing protein 3                                                                             |
| 20863 | dirMS_041712_NAR_50mM_minus.17847.17847.3 | 5.35 | 1.228E+05 M116m   | (R)IELAQL (R) E/L/A/L/Q/L/L/M/D/P/A/E/K/D(K)K   | 170.92 | 634.3353 | 1884.999 | -0.0097 | -1.2 | 4.18 | 25148.6  | 6     | HUMAN | P30041 | Peroxisome-6                                                                                                 |
| 20864 | dirMS_041712_NAR_50mM_minus.19315.19315.3 | 5.35 | 0.454E+05         | (R)IHNGES (R) I/H/N/G/E/S/V/S/V/I/V/S/V/P/V(L)K | 171.93 | 596.2923 | 1786.876 | -0.0135 | -7.6 | 5.92 | 24482.9  | 7.96  | HUMAN | B1AL49 | Phosphoribosyl pyrophosphate synthetase 1                                                                    |
| 20865 | dirMS_041712_NAR_120mM_plus.14029.14029.3 | 5.35 | 6.303E+05 M76m    | (K)IYVDDG (K) Y/V/D/D/G/L/S/J/L/Q/V(K)K         | 201.6  | 731.9104 | 1462.815 | -0.0016 | -1.1 | 4.21 | 30947.9  | 6.47  | HUMAN | H8Q334 | Pyruvate kinase                                                                                              |
| 20866 | dirMS_041712_NAR_20mM_plus.10440.10440.2  | 5.35 | 0.139E+05 M297m   | (K)IYMLQL (K) I/Y/M/L/Q/L/M/L/Q/K(K)K           | 144.77 | 490.2722 | 947.542  | 0.19555 | 5.8  | 8.5  | 90316.8  | 5.52  | HUMAN | Q13263 | Transcription intermediary factor 1-beta                                                                     |
| 20867 | dirMS_041712_NAR_20mM_plus.13610.13610.2  | 5.35 | 0.703E+04         | (K)ADJSLA (K) A/D/S/L/A/V/N(R)K                 | 165.95 | 458.2789 | 915.     |         |      |      |          |       |       |        |                                                                                                              |

|       |                                            |      |   |          |                                                         |        |          |          |          |       |      |          |       |       |         |                                                                      |
|-------|--------------------------------------------|------|---|----------|---------------------------------------------------------|--------|----------|----------|----------|-------|------|----------|-------|-------|---------|----------------------------------------------------------------------|
| 20924 | dirMS_041712_NAR_20mM_plus.10656.10656.2   | 5.32 | 1 | 5.17E+04 | (KIVSLEK(K)K)VV/S/L/E K S R(D)                          | 145.8  | 509.8006 | 1018.589 | 0.0048   | -4.7  | 8.72 | 120850.8 | 5.44  | HUMAN | C5JKA9  | Kinesin-like protein KIF15                                           |
| 20925 | dirMS_041712_NAR_30mM_plus2.18301.18301.2  | 5.32 | 0 | 1.69E+04 | (RIVNWS(R)R)VVN/SV/S/M/S/F/R(A)                         | 149.1  | 595.8347 | 1190.656 | 0.005    | 5     | 9.72 | 30659.7  | 9.02  | HUMAN | P16152  | Carboxyl reductase [NADPH] 1                                         |
| 20926 | dirMS_041712_NAR_30mM_plus2.20874.20874.2  | 5.32 | 0 | 1.37E+05 | (KIVVGS(K)R)VV/S/A/L/E K S R(D)                         | 84.55  | 447.2217 | 893.448  | -0.0114  | -12.8 | 8.4  | 1461.79  | 6.24  | HUMAN | 646582  | Synaptic vesicle membrane protein VAMP-1 homolog                     |
| 20927 | dirMS_041712_NAR_40mM_plus2.18023.18023.3  | 5.32 | 0 | 1.71E+05 | (KIVSSQ(S)K)S I S I Q/SV/NP/L A/V/N/A/N R(K)            | 17.4   | 60.3668  | 119.071  | 0.015    | -7.8  | 6.75 | 61224.7  | 5.7   | HUMAN | P10809  | 60 kDa heat shock protein, mitochondrial                             |
| 20928 | dirMS_041712_NAR_40mM_plus.13310.13310.3   | 5.32 | 1 | 4.04E+06 | (RIVVDL(R)VV)VM/A/H/M/A/S/K E(I)                        | 126.73 | 444.2219 | 1330.649 | 0.0018   | 1.3   | 5.51 | 31718.5  | 7.17  | HUMAN | E7U7A4  | Glyceroldehyde 3-phosphate dehydrogenase                             |
| 20929 | dirMS_041712_NAR_120mM_minus.17818.17818.4 | 5.31 | 0 | 3.17E+05 | (KKTTEMI(K)T)T I M V LQ/P/LH/L T S R(F)                 | 151.6  | 466.7676 | 1864.065 | -0.0165  | -8.9  | 8.76 | 95792.4  | 6.36  | HUMAN | J8KPV4  | DNA replication licensing factor MCM4                                |
| 20930 | dirMS_041712_NAR_30mM_minus.55315.55315.2  | 5.31 | 0 | 1.73E+05 | (RIVYDAG(R)R)VV/S/A/L/E K S R(D)                        | 160.5  | 550.3656 | 1299.727 | -0.0026  | -2.1  | 6    | 22489.6  | 5.38  | HUMAN | E9P39   | Elongation factor 1-delta (Fragment)                                 |
| 20931 | dirMS_041712_NAR_50mM_minus2.7337.7337.3   | 5.31 | 0 | 7.38E+04 | (KQIWAAL(K)A)A/V/A E K/P/P E/A/P K(G)                   | 108.58 | 478.9368 | 1434.795 | 0.0007   | 0.5   | 6.14 | 24364.9  | 6.44  | HUMAN | HY0P90  | Methionine-tRNA ligase, cytoplasmic (Fragment)                       |
| 20932 | dirMS_041712_NAR_60mM_minus.12082.12082.3  | 5.31 | 0 | 8.76E+04 | (KIVVDEL(K)VV)D/L E/L N L/LM/T L R(E)                   | 127.17 | 489.262  | 1465.79  | -0.0182  | -12.4 | 4.13 | 7015.9   | 5.12  | HUMAN | FBW124  | DCC-interacting protein 13-beta (Fragment)                           |
| 20933 | dirMS_041712_NAR_60mM_minus.14119.14119.3  | 5.31 | 0 | 8.54E+04 | (RIVHSPF(R)R)S/P/S/P/L P/T C/L/Q E R(K)                 | 138.58 | 523.6047 | 1568.81  | -0.0106  | -6.7  | 6.05 | 13059    | 10.02 | HUMAN | HY0J11  | HCG2004619                                                           |
| 20934 | dirMS_041712_NAR_60mM_minus.18422.18422.3  | 5.31 | 0 | 1.13E+04 | (RHLFPAL(R)R)L E/P A/LAFVQ/LU/LM R(M)                   | 163.17 | 550.9705 | 1650.896 | 0.0007   | 0.4   | 5.4  | 97883.4  | 6.02  | HUMAN | HQZ029  | Acetyl-CoA carboxylase 2                                             |
| 20935 | dirMS_041712_NAR_60mM_minus.7090.7090.3    | 5.31 | 0 | 9.81E+04 | (RIVDMM(R)R)VV/S/V/LM/E T/A L R(K)                      | 96.38  | 489.8917 | 1204.676 | -0.014   | -2.3  | 4.74 | 11804.7  | 6.24  | HUMAN | ESR044  | Transcription initiation factor IIE subunit beta (Fragment)          |
| 20936 | dirMS_041712_NAR_60mM_minus.9952.9952.3    | 5.31 | 1 | 5.63E+05 | M230m(K)R)M)S)M K E V D(E)Q)M/L/N/V/Q N(K)N             | 114.97 | 652.6318 | 1923.897 | 31.9836  | -3.2  | 4.68 | 40069.4  | 4.83  | HUMAN | FE7VR1  | Tubulin beta chain                                                   |
| 20937 | dirMS_041712_NAR_120mM_plus.10000.10000.3  | 5.31 | 1 | 1.08E+06 | (RIVYDFE(R)Q)Y/F/E I E Q/R R(F)                         | 106.22 | 423.5524 | 1268.638 | 0.0044   | 3.5   | 6.14 | 13246.4  | 9.21  | HUMAN | Q5Y17   | Nuclear receptor coactivator 5 (Fragment)                            |
| 20938 | dirMS_041712_NAR_120mM_plus.6136.6136.3    | 5.31 | 1 | 7.70E+05 | (RITAGDE(R)T)A/Q/E/V/T E Y R(K)                         | 86.7   | 418.2137 | 1252.628 | -0.005   | -1.2  | 5.81 | 6018.6   | 9.44  | HUMAN | B4DLW8  | Probable ATP-dependent RNA helicase DDX5                             |
| 20939 | dirMS_041712_NAR_120mM_plus.876.876.4      | 5.31 | 2 | 1.47E+05 | (RIVADYD(R)R)VV/S/D T/K E/G A/P A/Q E K R(L)            | 96.9   | 486.5049 | 1542.983 | -0.0015  | -0.8  | 4.87 | 54214.9  | 5.66  | HUMAN | C9B13   | Gad65om (Fragment)                                                   |
| 20940 | dirMS_041712_NAR_20mM_plus.15864.15864.2   | 5.31 | 0 | 1.48E+05 | (KIVGNY(K)G)V I/N Q/P/V/T V/P/P G/Q L A E K R(L)        | 176.68 | 912.9952 | 1824.985 | -0.0023  | -1.3  | 5.8  | 49012.3  | 4.9   | HUMAN | ARMU81  | Tubulin alpha-4A chain                                               |
| 20941 | dirMS_041712_NAR_20mM_plus.16657.16657.3   | 5.31 | 0 | 7.34E+04 | (RJAFTAR(R)A)A F T A F/E/A E/L Q P L R(L)               | 186.33 | 484.2492 | 1450.733 | 0.0005   | 0.4   | 4.53 | 25834.8  | 9.54  | HUMAN | Q96C77  | Coiled-coil domain-containing protein 124                            |
| 20942 | dirMS_041712_NAR_20mM_plus.17961.17961.2   | 5.31 | 0 | 1.12E+05 | (KIVDPQD(K)D)P/D/P/Q D/L T/V/LM/T G R(I)                | 195.37 | 780.9029 | 1560.802 | -0.0031  | -2    | 4.21 | 31330.8  | 9.26  | HUMAN | E9P082  | Malate dehydrogenase, mitochondrial                                  |
| 20943 | dirMS_041712_NAR_20mM_plus.18419.18419.2   | 5.31 | 0 | 1.22E+05 | (RIVYDGE(R)R)VV/S/V/Q/E/L Q/G A/V K(L)                  | 198.05 | 550.3656 | 1299.727 | -0.0026  | -2.1  | 6    | 22489.6  | 5.38  | HUMAN | E9P39   | Elongation factor 1-delta (Fragment)                                 |
| 20944 | dirMS_041712_NAR_20mM_plus.18887.18887.2   | 5.31 | 1 | 5.61E+04 | YS2Y                                                    | 201.58 | 74.8991  | 1348.82  | 19.9111  | 3.3   | 9.7  | 128647.2 | 6.02  | HUMAN | D3DWF9  | Expatin 6, isoform CRA_a                                             |
| 20945 | dirMS_041712_NAR_20mM_plus.7835.7835.3     | 5.31 | 0 | 1.01E+04 | M13m(MI)(K)VGG(S)K)G S G V E E/M/Q D E m T R(I)         | 123.68 | 576.588  | 1695.768 | 31.9818  | -4.4  | 4.14 | 17833.3  | 8.73  | HUMAN | C9JAN6  | Isostrate dehydrogenase [NADP] cytoplasmic (Fragment)                |
| 20946 | dirMS_041712_NAR_20mM_plus.8864.8864.2     | 5.31 | 0 | 3.88E+04 | M124m                                                   | 133.13 | 737.9225 | 1458.657 | 15.9948  | -0.1  | 4.37 | 15020.6  | 6.72  | HUMAN | ENP6T6  | Cathepsin H (Fragment)                                               |
| 20947 | dirMS_041712_NAR_20mM_plus.19542.19542.2   | 5.31 | 0 | 2.45E+05 | (KAPVPP(K)K)A/P/D/F I/V/P R P(L)                        | 156.57 | 591.8008 | 1182.594 | 0.0001   | 0.1   | 5.88 | 17218.8  | 6.3   | HUMAN | A7Y18   | Radixin                                                              |
| 20948 | dirMS_041712_NAR_20mM_plus.20462.20462.2   | 5.31 | 0 | 2.08E+05 | (KIVVYD(R)R)VV/S/V/Q/E/L Q/G A/V K(L)                   | 160.5  | 528.8445 | 1256.665 | -0.0028  | -2.2  | 4.17 | 9098.8   | 4.38  | HUMAN | HY0D08  | 60S acidic ribosomal protein P2 (Fragment)                           |
| 20949 | dirMS_041712_NAR_40mM_plus2.13331.13331.2  | 5.31 | 0 | 8.98E+04 | (KIVFYGG(K)R)F I/V/G G/W/N/M(K)                         | 144.42 | 477.7448 | 954.483  | -0.0059  | -0.9  | 8.75 | 31075.7  | 5.65  | HUMAN | PG0274  | Triosephosphate isomerase                                            |
| 20950 | dirMS_041712_NAR_40mM_plus2.14882.14882.3  | 5.31 | 2 | 8.78E+04 | K453k                                                   | 154.62 | 631.6626 | 1778.918 | 11.04548 | 6.3   | 8.5  | 62267.1  | 9.31  | HUMAN | FBW919  | Dual-specificity tyrosine-phosphatation-regulated kinase 1A          |
| 20951 | dirMS_041712_NAR_40mM_plus2.10371.10371.3  | 5.31 | 1 | 6.78E+04 | (KIVTGV(K)T)K/L Q/E/V/T/E M D S V R(K)                  | 121.03 | 512.5998 | 1553.773 | -0.0005  | -0.3  | 4.68 | 558007.1 | 5.44  | HUMAN | PS8107  | Epiplakin                                                            |
| 20952 | dirMS_041712_NAR_40mM_plus.11305.11305.2   | 5.31 | 1 | 7.25E+05 | (KIVSLEK(K)K)VV/S/L/E K S R(D)                          | 145.8  | 509.8006 | 1018.589 | 0.0048   | -4.7  | 8.72 | 120850.8 | 5.44  | HUMAN | C5JKA9  | Kinesin-like protein KIF15                                           |
| 20953 | dirMS_041712_NAR_60mM_plus.15362.15362.3   | 5.31 | 1 | 6.65E+04 | (KIVSLEK(K)K)S I S I Q/SV/NP/L A/V/N/A/N R(K)           | 137.6  | 554.2751 | 1660.708 | 0.0108   | 6.5   | 8.31 | 15014.9  | 3.9   | HUMAN | B4DH92  | Prostaglandin E synthase 3                                           |
| 20954 | dirMS_041712_NAR_60mM_plus.17054.17054.3   | 5.31 | 1 | 2.34E+05 | (RIVASU(R)R)S/L/S/V/A/N/S/D K L R(K)                    | 146.07 | 420.5832 | 1259.732 | 0.0003   | 2.6   | 8.79 | 41088.1  | 5.18  | HUMAN | FSH442  | Tumor susceptibility gene 101 protein                                |
| 20955 | dirMS_041712_NAR_60mM_plus.6400.6400.2     | 5.31 | 2 | 1.56E+06 | (KIVSVD(K)D)S I V D/E A/S K R(W)                        | 91.98  | 677.8149 | 1354.623 | -0.0008  | 0.6   | 4.56 | 32616.5  | 11.8  | HUMAN | AN6176  | Actin, alpha skeletal muscle                                         |
| 20956 | dirMS_041712_NAR_120mM_plus.12170.12170.3  | 5.31 | 1 | 5.54E+05 | (RIVSLEK(K)K)VV/S/L/E K S R(D)                          | 135.15 | 518.2152 | 1070.670 | -0.0073  | -6.6  | 8.76 | 38493.6  | 6.95  | HUMAN | FZ2803  | Profilin 1, isoform CRA_b                                            |
| 20957 | dirMS_041712_NAR_120mM_minus.6922.6922.2   | 5.3  | 0 | 4.89E+05 | (RHPQAT(R)K)Q)P/T/A I/V/A/V M(T)                        | 91.83  | 485.7898 | 976.573  | -0.0008  | -0.8  | 8.76 | 63448.4  | 7.29  | HUMAN | B4E022  | Transketolase                                                        |
| 20958 | dirMS_041712_NAR_20mM_minus.12877.12877.2  | 5.3  | 0 | 3.48E+05 | (RIVFAQD(S)R)F A/Q/Q/ I/S E V T S A K(E)                | 178.78 | 769.3885 | 1537.74  | -0.0047  | -3.1  | 4.14 | 104488.6 | 5.36  | HUMAN | B2RCS5  | Actinin, alpha 2, isoform CRA_b                                      |
| 20959 | dirMS_041712_NAR_30mM_minus2.8791.8813.2   | 5.3  | 0 | 9.30E+04 | (KIVWJGE(K)W)J/G S/E/K(L)                               | 102.48 | 424.7117 | 848.415  | 0.0013   | 1.5   | 4.53 | 32617.4  | 7.2   | HUMAN | IBL41   | Uncharacterized protein (Fragment)                                   |
| 20960 | dirMS_041712_NAR_40mM_minus.12094.12094.3  | 5.3  | 0 | 2.84E+05 | (KIVNAGE(K)R)M S E V D E V Q/L V Q I T D/P E K P K(R)   | 154.05 | 646.6785 | 1938.018 | 0.0031   | 1.6   | 4.32 | 28472.4  | 5.71  | HUMAN | PT1338  | Filamin-A                                                            |
| 20961 | dirMS_041712_NAR_40mM_minus2.7377.7377.3   | 5.3  | 0 | 1.00E+05 | (KIVKSPQ(K)K)S Q/E/S/P/Q E K Q T E V I/P A A P R(K)     | 119.13 | 644.6737 | 1932.018 | -0.012   | -6.2  | 6.19 | 15600.9  | 10.38 | HUMAN | BL1P9   | FLVCH family member 2                                                |
| 20962 | dirMS_041712_NAR_50mM_minus2.13917.13917.3 | 5.3  | 2 | 1.52E+04 | 3316s                                                   | 147.17 | 575.9781 | 1645.948 | 79.9714  | 3     | 8.69 | 38610.4  | 5.31  | HUMAN | QBNG652 | Isoform 2 of Chondroitin sulfate N-acetylgalactosaminyltransferase 2 |
| 20963 | dirMS_041712_NAR_50mM_minus.13959.13959.3  | 5.3  | 1 | 3.85E+05 | (KIVGDK(K)T)D I I E K E G E/V(G)P E N L R(I)            | 146.67 | 618.665  | 1853.997 | -0.0163  | -8.8  | 4.1  | 287260.7 | 5.95  | HUMAN | Q13085  | Acetyl-CoA carboxylase 1                                             |
| 20964 | dirMS_041712_NAR_50mM_minus.9784.9784.3    | 5.3  | 0 | 1.51E+05 | (RIVSMEV(R)R)S M S E V D P/V N A A P P K(R)             | 123.38 | 491.9322 | 1473.762 | 0.0203   | 13.8  | 4.37 | 62903.7  | 5.8   | HUMAN | Q9D966  | Neuroblast differentiation-associated protein ANNAK                  |
| 20965 | dirMS_041712_NAR_60mM_minus.13733.13733.3  | 5.3  | 1 | 1.67E+05 | (KIVSLEK(K)K)VV/S/L/E K S R(D)                          | 145.8  | 509.8006 | 1018.589 | 0.0048   | -4.7  | 8.72 | 120850.8 | 5.44  | HUMAN | C5JKA9  | Kinesin-like protein KIF15                                           |
| 20966 | dirMS_041712_NAR_60mM_minus.8611.8611.3    | 5.3  | 1 | 3.08E+05 | V455y                                                   | 102.73 | 665.636  | 1834.981 | 159.9124 | 11.0  | 9.99 | 52919.9  | 9.85  | HUMAN | Q9YK19  | Ankyrin repeat domain-containing protein 34A                         |
| 20967 | dirMS_041712_NAR_60mM_minus.8899.8899.3    | 5.3  | 1 | 3.60E+05 | M230m(K)R)M)S)M K E V D(E)Q)M/L/N/V/Q N(K)N             | 110.3  | 652.6318 | 1923.897 | 31.9836  | -3.2  | 4.68 | 40069.4  | 4.83  | HUMAN | FE7VR1  | Tubulin beta chain                                                   |
| 20968 | dirMS_041712_NAR_60mM_minus.9874.9874.3    | 5.3  | 1 | 9.29E+04 | (KIVFADN(K)R)F A/Q/D/Q/V G K S L T R(K)                 | 114.83 | 427.2322 | 1279.7   | -0.0184  | -14.4 | 10   | 56913.3  | 8.55  | HUMAN | F498025 | Isoform 5 of Regulator of G-protein signaling 7                      |
| 20969 | dirMS_041712_NAR_20mM_plus.16572.16572.2   | 5.3  | 0 | 2.68E+04 | M50m                                                    | 185.58 | 821.3739 | 1625.748 | 15.9931  | -1.2  | 3.84 | 11504.1  | 9.57  | HUMAN | Q72444  | Profilin 1, isoform CRA_b                                            |
| 20970 | dirMS_041712_NAR_20mM_plus2.17176.17176.2  | 5.3  | 0 | 1.09E+05 | (KIVFATA(K)K)F A/T/I E/L A/V/T L I R(I)                 | 189.05 | 603.3442 | 1205.689 | -0.0077  | -6.4  | 6    | 44227.3  | 7.81  | HUMAN | ETC066  | T-complex protein 1 subunit alpha                                    |
| 20971 | dirMS_041712_NAR_20mM_plus.9786.9786.2     | 5.3  | 0 | 1.16E+05 | (KIVAGQD(K)K)V/G/D/G S/V G F K(R)                       | 138.38 | 617.8225 | 1234.643 | -0.0049  | -4    | 5.81 | 17127.4  | 10.05 | HUMAN | AMBU27  | Small ubiquitin-related modifier 3                                   |
| 20972 | dirMS_041712_NAR_50mM_plus2.12565.12565.3  | 5.3  | 1 | 3.79E+04 | (KIVDMAL(K)M)A I/A/T K/E V A L A K(I)                   | 135.32 | 487.9611 | 1461.798 | -0.0044  | -3    | 6.07 | 80579.3  | 7.65  | HUMAN | B9ZV1R  | Microtubule-associated protein                                       |
| 20973 | dirMS_041712_NAR_50mM_plus2.14116.14116.3  | 5.3  | 1 | 7.81E+05 | (RIVSMKK(R)R)M S K E V D E V Q/L V Q I T D/P E K P K(R) | 142.88 | 644.9706 | 1923.897 | 0        | 0     | 4.68 | 40069.4  | 4.83  | HUMAN | FE7VR1  | Tubulin beta chain                                                   |
| 20974 | dirMS_041712_NAR_50mM_plus2.15308.15308.3  | 5.3  | 1 | 8.49E+05 | (KIVFTRF(R)R)F I/V/G F/T I Y/V A/V L R(I)               | 148.77 | 490.5973 | 1463.727 | -0.005   | -4.7  | 6.17 | 55161.8  | 6.02  | HUMAN | Q9D966  | Selenium-binding protein 5                                           |
| 20975 | dirMS_041712_NAR_50mM_plus2.21649.21649.3  | 5.3  | 0 | 1.01E+05 | (KIVHPLA(K)T)H L P L A I/L I/P Q/L T D Q V(K)           | 183.97 | 601.0191 | 1801.058 | -0.0154  | -8.6  | 6.41 | 22243.5  | 7.91  | HUMAN | EP9PK8  | Sulfotransferase 1A2 (Fragment)                                      |
| 20976 | dirMS_041712_NAR_60mM_plus.18096.18096.3   | 5.3  |   |          |                                                         |        |          |          |          |       |      |          |       |       |         |                                                                      |

|       |                                            |      |                      |                                                  |        |            |           |          |       |         |          |       |        |                             |                                                                    |
|-------|--------------------------------------------|------|----------------------|--------------------------------------------------|--------|------------|-----------|----------|-------|---------|----------|-------|--------|-----------------------------|--------------------------------------------------------------------|
| 21033 | dirMS_041712_NAR_20mM_plus.11022.11022.2   | 5.27 | 0.517E-04            | (RIGATQQ(R)IG AVT/Q/V/L D/E/A/E/RIS)             | 148.35 | 665.8352   | 1330.66   | 0.0034   | 2.5   | 4.14    | 57204.9  | 6.01  | HUMAN  | FSGW6F6                     | T-complex protein 1 subunit beta                                   |
| 21034 | dirMS_041712_NAR_20mM_plus.14418.14418.3   | 5.27 | 0.117E+05 M174m      | (KlAmGAA(K)Am GVA A Q V V V V V T D U S A T RL)  | 171.2  | 535.9457   | 1589.832  | 15.991   | -2.5  | 5.88    | 36856.1  | 8.55  | HUMAN  | HOYLA4                      | Sorbitol dehydrogenase                                             |
| 21035 | dirMS_041712_NAR_20mM_plus.18024.18024.2   | 5.27 | 0.744E-04            | (RIGATQ(R)IG AVT/Q/V/L D/E/A/E/RIS)              | 166.5  | 543.2658   | 1627.911  | -0.026   | -1    | 8.75    | 17973    | 5.16  | HUMAN  | EPH7E5                      | Eukaryotic peptide chain release factor subunit 1                  |
| 21036 | dirMS_041712_NAR_40mM_plus.8258.8258.2     | 5.27 | 0.192E+05            | (RIUAVD(R)IG V/V/V/D/V/R/G)                      | 120.83 | 443.7528   | 886.499   | -0.0091  | -1.1  | 4.21    | 23792.5  | 9.85  | HUMAN  | C9Z17                       | NON-POU domain-containing octamer-binding protein (Fragment)       |
| 21037 | dirMS_041712_NAR_40mM_plus.9769.9769.2     | 5.27 | 0.173E+05            | (KIElMFA(K)lN VYF/A/K/A)                         | 121.18 | 442.7291   | 884.451   | -0.0236  | -0.4  | 6.1     | 41827.5  | 7     | HUMAN  | B727A9                      | Phosphoglycerate kinase                                            |
| 21038 | dirMS_041712_NAR_50mM_plus.13279.13279.3   | 5.27 | 1.166E+05            | (KIQGLM(K)QI Q/L/V/M/N/P I N I G Y S G K K I T)  | 137.87 | 540.6161   | 1619.8557 | -0.0236  | -0.46 | 9.7     | 15730.4  | 11.67 | HUMAN  | D3Y7B1                      | 60S ribosomal protein L32 (Fragment)                               |
| 21039 | dirMS_041712_NAR_50mM_plus.13364.13364.3   | 5.27 | 1.180E+05            | (RIGATQ(R)IG AVT/Q/V/L D/E/A/E/RIS)              | 166.5  | 543.2658   | 1627.911  | -0.026   | -1    | 8.75    | 17973    | 5.16  | HUMAN  | EPH7E5                      | Heat shock cognate 71 kDa protein (Fragment)                       |
| 21040 | dirMS_041712_NAR_50mM_plus.16873.16873.3   | 5.27 | 1.469E+05 T360J 536J | (RIFPDR(R)IF P F Q R I S Y M V S V V K I T)      | 165.72 | 589.5785   | 1550.816  | 375.9504 | -12.6 | 6.14    | 47175.1  | 9.74  | HUMAN  | Q5G024                      | Tumor necrosis factor receptor superfamily member 19L              |
| 21041 | dirMS_041712_NAR_50mM_plus.18465.18465.3   | 5.27 | 1.592E+05            | (KILPELV(K)lL E/P L/L/L G K E/F/R)               | 164.52 | 460.6256   | 1379.862  | 0.0002   | 0.1   | 6.14    | 16559.1  | 10.36 | HUMAN  | PE2249                      | 40S ribosomal protein S16                                          |
| 21042 | dirMS_041712_NAR_50mM_plus.22097.22097.3   | 5.27 | 1.587E+05            | (KIGDLU(K)IG A/G/L F/L D K F/P L/K/E)            | 189.8  | 455.2587   | 1363.762  | -0.0005  | -0.3  | 6.0     | 260187.7 | 6.1   | HUMAN  | Q2TCU6                      | Talin 1                                                            |
| 21043 | dirMS_041712_NAR_60mM_plus.12133.12133.3   | 5.27 | 1.731E+06            | (KIGADL(R)IG G R/L/V/S/S/D/V/L/P/K/E)            | 120.27 | 493.328    | 1473.78   | -0.0101  | -0.8  | 4.56    | 56007.4  | 5.37  | HUMAN  | FRV8X8                      | Keratin, type II cytoskeletal 8                                    |
| 21044 | dirMS_041712_NAR_60mM_plus.18364.18364.2   | 5.27 | 1.977E+04            | (RISTVDR(R)E T Y R D I L P Q/V/T/L/R/R)          | 151.1  | 461.188927 | 917.0     | -0.0031  | -1.7  | 4.43    | 16337.8  | 6.8   | HUMAN  | FRV8X8                      | High light chain roadblock-type 1                                  |
| 21045 | dirMS_041712_NAR_120mM_minus.10662.10662.3 | 5.26 | 1.870E-04            | (RIRGVRR(K)G V V I G I P E I Y G R L)            | 111.63 | 401.559    | 1202.664  | -0.0016  | -1.3  | 8.75    | 266161   | 5.68  | HUMAN  | EP9PUD                      | Epiplectin                                                         |
| 21046 | dirMS_041712_NAR_120mM_minus.10723.10723.2 | 5.26 | 1.118E+03            | (KJKIAPR(K)K/A/V/A/P E R I K)                    | 113.33 | 518.8303   | 1036.651  | 0.002    | 1.9   | 8.75    | 32616.5  | 5.18  | HUMAN  | ANL176                      | Actin, alpha skeletal muscle                                       |
| 21047 | dirMS_041712_NAR_30mM_minus.14635.14635.2  | 5.26 | 0.181E+05            | (KINWFFR(K)W/V I E/N S K I)                      | 133.38 | 555.2675   | 1109.542  | -0.0137  | -12.4 | 6       | 224627.6 | 6.68  | HUMAN  | BSM5Y1                      | Uncharacterized protein (Fragment)                                 |
| 21048 | dirMS_041712_NAR_60mM_minus.10426.10426.3  | 5.26 | 0.196E+05            | (RILSNAL(R)LS N/L A/V/K P E R I K)               | 118.55 | 404.2826   | 121.736   | -0.0017  | -1.4  | 8.59    | 15511    | 6.44  | HUMAN  | B4D164                      | Programmed cell death protein 5                                    |
| 21049 | dirMS_041712_NAR_60mM_minus.15572.15572.3  | 5.26 | 1.09E+05 M332m       | (RKAJEF(R)A K F/E L E M/V/D/V/L/F R I)           | 147.6  | 510.255    | 1512.752  | 15.9988  | 2.6   | 5.07    | 12021    | 5.07  | HUMAN  | P11021                      | 78 kDa cytoskeleton-regulated protein                              |
| 21050 | dirMS_041712_NAR_120mM_plus.10504.10679.3  | 5.26 | 0.755E+05            | (RHHSSM(R)H S S M/V/GV/N/V/A P K/A)              | 108.35 | 456.5762   | 1367.71   | 0.0041   | 3     | 8.8     | 41827.5  | 7     | HUMAN  | B727A9                      | Phosphoglycerate kinase                                            |
| 21051 | dirMS_041712_NAR_120mM_plus.11710.11710.3  | 5.26 | 0.125E+06            | (RIGSAVR(K)S A/V/A/Q/V/S/E/E/P R K)              | 111.32 | 442.5657   | 1325.681  | 0.0017   | 1.3   | 5.4     | 558007.1 | 5.44  | HUMAN  | PS8107                      | Epiplectin                                                         |
| 21052 | dirMS_041712_NAR_20mM_plus.12801.12801.2   | 5.26 | 0.479E+05 M1m NSm    | (KIHPPH(L)H M/P L/F/P L/P R L)                   | 161.78 | 652.3439   | 1084.597  | 213.0833 | 6.9   | 9.5     | 39133.5  | 4.5   | HUMAN  | Q8T0912                     | Isform 2 of Melanoma-associated antigen C3                         |
| 21053 | dirMS_041712_NAR_20mM_plus.8725.8725.3     | 5.26 | 0.141E+05 M224m      | (KIGGKRF(K)G K P F P P A/V/P Q/V V/P/T/L/R)      | 130.62 | 530.6038   | 1573.800  | 15.9526  | -1.5  | 6       | 25541.5  | 9.92  | HUMAN  | EP9J09                      | 40S ribosomal protein S3                                           |
| 21054 | dirMS_041712_NAR_30mM_plus.21976.21976.2   | 5.26 | 0.223E+05            | (RIFATFN(R)A F/T/J/T/P F/F M/D/K)                | 171.32 | 632.8481   | 1264.694  | -0.0047  | -3.7  | 5.8     | 77799.7  | 9.09  | HUMAN  | PS2272                      | Heterogeneous nuclear ribonucleoprotein M                          |
| 21055 | dirMS_041712_NAR_30mM_plus.2478.5478.2     | 5.26 | 0.624E-04            | (KIQSDOR(K)S Q/D/D/E/L/R L)                      | 83.02  | 426.741    | 972.475   | 0.0002   | 0.2   | 4.37    | 33803.8  | 6.12  | HUMAN  | BLAKP7                      | TAR DNA binding protein                                            |
| 21056 | dirMS_041712_NAR_40mM_plus.17141.17141.3   | 5.26 | 0.684E+04            | (RIGHPFL(R)H V/P L/T A/P V/P/S A/E R I K)        | 166.5  | 536.3246   | 1756.953  | -0.0004  | -2.3  | 6.75    | 49012.3  | 4.9   | HUMAN  | AM80U5                      | Tubulin alpha-4 chain                                              |
| 21057 | dirMS_041712_NAR_40mM_plus.17698.17698.3   | 5.26 | 0.536E+04            | (KASHTO(K)AS H/T/V Q/V/L/V E L E R I K)          | 170.05 | 575.6528   | 1722.973  | 0.0109   | 6.3   | 5.4     | 24511.6  | 6.62  | HUMAN  | CISF5                       | Yglin (Fragment)                                                   |
| 21058 | dirMS_041712_NAR_50mM_plus.11279.11279.3   | 5.26 | 0.544E+05            | (RILLEAA(R)L L/E A/Q/C/T G G/V/H/P T T G Q/V(L)) | 127.23 | 665.6855   | 1995.033  | -0.0092  | -4.6  | 6.75    | 32421.3  | 6.44  | HUMAN  | P15924                      | Desmoglein                                                         |
| 21059 | dirMS_041712_NAR_50mM_plus.18134.18134.3   | 5.26 | 1.09E+05             | (KILDKIP(K)D L E I/V I/P/V/V V R I)              | 163.5  | 427.6021   | 1280.794  | -0.0019  | -1.5  | 6.07    | 44183.5  | 5.64  | HUMAN  | FSGXCB                      | Succinyl-CoA ligase [ADP-forming] subunit beta, mitochondrial      |
| 21060 | dirMS_041712_NAR_60mM_plus.11511.5111.3    | 5.26 | 1.395E+05            | (RJAADDE(R)A A/E D D/E D D/D V T K I Q I)        | 83.53  | 522.5529   | 1565.645  | -0.0008  | -0.5  | 3.76    | 14166.2  | 3.71  | HUMAN  | B8Z2A1                      | Thymosin alpha-1                                                   |
| 21061 | dirMS_041712_NAR_120mM_plus.13791.13791.3  | 5.26 | 1.238E+05            | (RIVVFN(R)R V/V/L/F E E A R I K)                 | 129.22 | 438.231    | 1398.71   | -0.0019  | -1.7  | 4.43    | 2167.9   | 5.68  | HUMAN  | FRV8X8                      | Zinc finger protein 667                                            |
| 21062 | dirMS_041712_NAR_20mM_plus.10303.10303.2   | 5.25 | 0.495E+04 M145m      | (RIVVFN(R)R V/V/L/F E E A R I K)                 | 152.52 | 555.2886   | 1093.571  | 15.9593  | 0.3   | 4.53    | 21424.2  | 5.34  | HUMAN  | ESG6C8                      | Copine-3 (Fragment)                                                |
| 21063 | dirMS_041712_NAR_20mM_minus.11733.11733.2  | 5.25 | 0.325E+05            | (RIGALQN(R)G A/L/Q/V/N/V/P/A S/G A A A I K)      | 165.33 | 706.3976   | 1411.79   | -0.0024  | -1.7  | 8.75    | 31716.2  | 7.17  | HUMAN  | LEU7L4                      | Glyceroldehyde-3-phosphate dehydrogenase                           |
| 21064 | dirMS_041712_NAR_20mM_plus.13061.13061.2   | 5.25 | 0.370E+05 M35m       | (KINDIANE(K)N D I/V E I/L N I E L M I K)         | 161.87 | 588.7948   | 1160.598  | 15.9843  | -9    | 4.37    | 28354    | 7.17  | HUMAN  | B4D164                      | 26S proteasome non-ATPase regulatory subunit 7                     |
| 21065 | dirMS_041712_NAR_20mM_plus.12259.12259.2   | 5.25 | 0.196E+05            | (KIGDSDR(K)G S/V/A/V/V/V/V/V V I K)              | 119.97 | 452.6569   | 1015.126  | -0.0016  | -3.2  | 4.37    | 38466.9  | 4.98  | HUMAN  | KH86U3                      | Pyruvate kinase (Fragment)                                         |
| 21066 | dirMS_041712_NAR_40mM_plus.12122.12122.3   | 5.25 | 0.287E+05            | (RIGDQEL(R)Q/Q/Q/V/D/L T V D D H Q R I Q)        | 154.23 | 646.6596   | 1937.956  | 0.0079   | -6.1  | 4.03    | 23493.8  | 5.45  | HUMAN  | FRV173                      | Mysin-10                                                           |
| 21067 | dirMS_041712_NAR_50mM_plus.16918.16918.3   | 5.25 | 1.318E+05 S119s      | (KILATVVC(K)L A/T V V G E N/G V L R A I K)       | 165.27 | 568.6422   | 1470.839  | 203.0793 | 0.7   | 6       | 19174.7  | 10.16 | HUMAN  | EP9M67                      | Inner centromere protein (Fragment)                                |
| 21068 | dirMS_041712_NAR_50mM_plus.2995.9955.3     | 5.25 | 1.132E+06            | (RIMKQEF(R)M Q/K E I T A I L V A P T S/M/K I Q)  | 121.45 | 516.9426   | 1548.812  | 0.0008   | 0.5   | 8.35    | 32616.5  | 5.18  | HUMAN  | ANL176                      | Actin, alpha skeletal muscle                                       |
| 21069 | dirMS_041712_NAR_60mM_plus.19449.19449.3   | 5.25 | 0.365E+05            | (KIHSDQR(K)H S Q F I Q/V/P I T Y L E K I Q)      | 173.42 | 603.6548   | 1808.958  | -0.0003  | -4.6  | 6.75    | 83605    | 4.97  | HUMAN  | R0Z828                      | Heat shock protein HSP 90-beta                                     |
| 21070 | dirMS_041712_NAR_120mM_plus.12323.12323.2  | 5.25 | 1.309E+05            | (RIGKRA(R)K R A/Q/V/L/F R I K)                   | 117.15 | 474.2826   | 947.567   | 0.0074   | 7.8   | 8.75    | 86001    | 5.1   | HUMAN  | CR27A5                      | Transitional endoplasmic reticulum ATPase (Fragment)               |
| 21071 | dirMS_041712_NAR_30mM_plus.21547.21547.2   | 5.25 | 0.334E+05            | (RINSVLE(R)S S/P L/V L I L K I)                  | 169.57 | 539.8002   | 1078.614  | -0.0032  | -2.9  | 6       | 53695.9  | 5.35  | HUMAN  | BSM5CO5                     | Protein disulfide-isomerase A6                                     |
| 21072 | dirMS_041712_NAR_30mM_plus.2662.6622.2     | 5.25 | 0.879E+03            | (RIGDCLD(R)D S C/P L D C K V I)                  | 88.93  | 497.7072   | 994.397   | 0.0103   | 10.3  | 4.21    | 14431.1  | 10.95 | HUMAN  | BAE241                      | Serine/arginine-rich-splicing factor 3                             |
| 21073 | dirMS_041712_NAR_40mM_plus.10622.10622.2   | 5.25 | 0.163E+05            | (RIGSVEAR(L)G S/V A/E P K I T)                   | 128.13 | 400.7336   | 800.451   | 0.0087   | 10.8  | 6       | 1767.5   | 5.69  | HUMAN  | FSGW6F6                     | Purified ribosomal RNA methyltransferase NP02 (Fragment)           |
| 21074 | dirMS_041712_NAR_40mM_plus.13452.13452.3   | 5.25 | 0.249E+05            | (KINWSPR(K)W V I E/N S K I)                      | 133.23 | 555.2675   | 1109.542  | -0.0137  | -12.4 | 6       | 224627.6 | 6.68  | HUMAN  | BSM5Y1                      | Uncharacterized protein (Fragment)                                 |
| 21075 | dirMS_041712_NAR_40mM_plus.7523.7523.2     | 5.25 | 0.189E+05            | (RISYDFR(R)S G Y F D E R I K)                    | 104.25 | 437.1906   | 873.374   | 0.0002   | 0.2   | 4.37    | 21621.5  | 9.91  | HUMAN  | C9I6W7                      | Creative kinase U-type, mitochondrial (Fragment)                   |
| 21076 | dirMS_041712_NAR_50mM_plus.15585.15585.3   | 5.25 | 1.001E+06            | (RIRKVPQ(R)K V P G V T A I E/L D I Q/T G T R I)  | 149.87 | 600.0408   | 1948.002  | -0.0024  | -1.2  | 4.32    | 86868.3  | 5.77  | HUMAN  | B4D2X6                      | Fragile X mental retardation syndrome-related protein 1            |
| 21077 | dirMS_041712_NAR_50mM_plus.18449.18449.3   | 5.25 | 0.344E+05            | (RIFVTDD(R)R F I I T D/D H M/M P K I Q)          | 154.67 | 532.581    | 1595.723  | 0.0052   | 3.2   | 4.41    | 92752.5  | 4.76  | HUMAN  | P14625                      | Endoplasmic reticulum chaperone protein 78 kDa protein             |
| 21078 | dirMS_041712_NAR_50mM_plus.2947.2947.3     | 5.25 | 0.355E+04            | (KIMKAD(R)A E M E K/V M V I L E R I K)           | 108.27 | 514.9321   | 1542.792  | -0.0012  | -6.6  | 6.51    | 14919.8  | 4.98  | HUMAN  | Q95226                      | Acute leukemia-rich nuclear phosphoprotein 32 family member D      |
| 21079 | dirMS_041712_NAR_60mM_plus.8239.8239.3     | 5.25 | 8.27E+05             | (RIFEPYR(R)E I/P/N A P T X R I K)                | 101.38 | 408.2176   | 1222.622  | 0.0167   | 13.7  | 5.89    | 77799.7  | 9.09  | HUMAN  | PS2272                      | Heterogeneous nuclear ribonucleoprotein M                          |
| 21080 | dirMS_041712_NAR_120mM_minus.11251.11251.3 | 5.24 | 0.174E+05            | (RIGFCLPR(R)G F C/L/P/P/K S C R I G)             | 114.25 | 410.858    | 1230.551  | 0.0088   | 7.1   | 9.75    | 14391.8  | 4.99  | HUMAN  | G3V416                      | Creatine kinase B-type (Fragment)                                  |
| 21081 | dirMS_041712_NAR_120mM_minus.11688.11688.3 | 5.24 | 0.117E+05            | (RHHQSE(R)K Q S F V L I V G E T G S G K I T)     | 117.82 | 482.5826   | 1445.738  | -0.0051  | -3.5  | 6.75    | 91370    | 7.16  | HUMAN  | Q43143                      | Purified pre-mRNA-splicing factor ATP-dependent RNA helicase DHX15 |
| 21082 | dirMS_041712_NAR_120mM_minus.4943.4943.3   | 5.24 | 1.621E+05            | (RHAIEED(R)A E/E D I A/D P P V R I Q I)          | 79.23  | 453.8176   | 1359.602  | -0.002   | -1.5  | 4.08    | 11529.7  | 4.14  | HUMAN  | P20962                      | Parathyroid hormone-related protein                                |
| 21083 | dirMS_041712_NAR_20mM_plus.13652.13652.3   | 5.24 | 0.335E+05 N153n      | (KIMGAA(K)K I/V G A/V/V A F R I G)               | 107.67 | 574.9724   | 1518.833  | 0.725    | 6.8   | 54171.7 | 6.04     | HUMAN | P15917 | Microsomal sulfotransferase |                                                                    |
| 21084 | dirMS_041712_NAR_50mM_minus.8602.8602.3    | 5.24 | 1.470E+04            | (RIELHTS(R)E L/R T S L/S P D A/P R L I)          | 115.78 | 496.9372   | 1488.781  | 0.0165   | 11.1  | 6.17    | 98826.2  | 5.71  | HUMAN  | Q9UMF0                      | Intercellular adhesion molecule 5                                  |
| 21085 | dirMS_041712_NAR_50mM_plus.9886.9886.3     | 5.24 | 1.111E+05            | (RIGVEPFA(R)G V P V A L S E E R L A I K)         | 124.5  | 519.2824   | 1555.833  | 0.0      | 0     | 4.49    | 8516.9   | 5.11  | HUMAN  | EP9I18                      | Splicing factor 3B subunit 2 (Fragment)                            |
| 21086 | dirMS_041712_NAR_60mM_minus.10815.10815.3  | 5.24 | 1.389E+05            | (KITAVCE(K)T A/V C/D I P P R G I K M)            | 148.22 | 442        |           |          |       |         |          |       |        |                             |                                                                    |

|       |                                            |   |      |                  |                                                     |                    |        |          |          |           |       |      |          |      |       |        |                                                              |
|-------|--------------------------------------------|---|------|------------------|-----------------------------------------------------|--------------------|--------|----------|----------|-----------|-------|------|----------|------|-------|--------|--------------------------------------------------------------|
| 21142 | dirMS_041712_NAR_40mM_minus.5402.5402.2    | 2 | 5.21 | 0.103E+05        | (KIDSVGG)(K)D S V I V G D E A Q S (K R)             |                    | 89.65  | 599.7638 | 1198.522 | -0.0019   | -1.6  | 4.0  | 32616.5  | 5.18 | HUMAN | ANL76  | Actin, alpha skeletal muscle                                 |
| 21143 | dirMS_041712_NAR_40mM_minus.9226.9226.3    | 3 | 5.21 | 1.515E+03 M331M  | (R)GSDV(R) (R) G D V I P P F S K V D E Q M K(Y)     | m.Dnaad methionine | 136.67 | 663.3223 | 1971.937 | 16.0155   | 10.4  | 4.32 | 8373.6   | 5.55 | HUMAN | PL3101 | X-ray repair cross-complementing protein 5                   |
| 21144 | dirMS_041712_NAR_50mM_minus.9377.9377.1    | 1 | 5.21 | 0.154E+05        | (R)YVDA(R) (R) V A F A L E G I L G V I V A F A I    | m.Dnaad methionine | 165.95 | 405.3252 | 1807.971 | -0.0094   | -5.4  | 5.6  | 31075.7  | 5.65 | HUMAN | 610074 | Cytosolic dynein 1 heavy chain 1                             |
| 21145 | dirMS_041712_NAR_60mM_minus.13488.13488.3  | 3 | 5.21 | 1.116E+05 M160m  | (K)FRODQ(K)F R Q S D L M N I I A G T T L S L L K    | m.Dnaad methionine | 155.45 | 599.9744 | 1781.921 | -15.9872  | -4.3  | 8.75 | 27004.4  | 6.01 | HUMAN | FGW576 | T-complex protein 1 subunit beta                             |
| 21146 | dirMS_041712_NAR_60mM_minus.14332.14332.3  | 3 | 5.21 | 0.262E+05        | (R)LDVPHY(R) L/D/P H I T Y P I A H I R              | m.Dnaad methionine | 139.9  | 412.8902 | 1326.662 | -0.0063   | -5.1  | 5.08 | 42753    | 8.21 | HUMAN | EP9C85 | Vasectomized intestinal polyprotein receptor 2               |
| 21147 | dirMS_041712_NAR_60mM_minus.14356.14356.3  | 3 | 5.21 | 1.303E+04        | (R)SILKID(R) (R) L A K I O D V M V I P L A I R      | m.Dnaad methionine | 139.63 | 458.2637 | 1372.78  | -0.0029   | -2.1  | 5.08 | 8373.6   | 7.81 | HUMAN | BZ7274 | T-complex protein 1 subunit delta                            |
| 21148 | dirMS_041712_NAR_60mM_minus.18021.18021.3  | 3 | 5.21 | 0.143E+05        | (R)YVDA(R) (R) V A F A L E G I L G V I V A F A I    | m.Dnaad methionine | 165.95 | 405.3252 | 1807.971 | -0.0094   | -5.4  | 5.6  | 31075.7  | 5.65 | HUMAN | 610074 | Cytosolic dynein 1 heavy chain 1                             |
| 21149 | dirMS_041712_NAR_60mM_minus.18853.18853.3  | 3 | 5.21 | 1.267E+05        | (K)NAGAA(K) N A G A L A D L A K E L A N K           | m.Dnaad methionine | 166.87 | 452.6004 | 1355.789 | -0.0026   | -2.2  | 6.07 | 13796.8  | 9.33 | HUMAN | BZ7451 | Transcription elongation factor A protein 1                  |
| 21150 | dirMS_041712_NAR_60mM_minus.7263.7263.3    | 3 | 5.21 | 0.440E+04 K306k  | (R)GSPSL(R) (R) G S P L L D / P H I Q / H I Q       | m.Dnaad methionine | 199.28 | 473.258  | 1303.737 | -114.0226 | -14.2 | 6.74 | 35128.2  | 9.07 | HUMAN | QI4H44 | Dual oxidase maturation factor 2                             |
| 21151 | dirMS_041712_NAR_20mM_plus.17587.17587.2   | 2 | 5.21 | 0.856E+04        | (R)GDGPG(R) (R) G G I P V C L V L I A P T R I E     | m.Dnaad methionine | 193.13 | 684.8681 | 1368.73  | -0.0015   | -1.1  | 5.84 | 61018.6  | 9.44 | HUMAN | B4D106 | ATP-dependent RNA helicase CHX1                              |
| 21152 | dirMS_041712_NAR_20mM_plus.8092.8092.2     | 2 | 5.21 | 0.106E+05        | (K)YTFDQ(K) (K) V T D D / T S V L R S               | m.Dnaad methionine | 126.02 | 553.7889 | 1106.569 | 0.0017    | 1.6   | 4.37 | 80685.1  | 7.31 | HUMAN | PD3165 | Propionyl-CoA carboxylase alpha chain, mitochondrial         |
| 21153 | dirMS_041712_NAR_20mM_plus.9881.9881.3     | 3 | 5.21 | 6.134E+04 M256m  | (R)YVDA(R) (R) V A F A L E G I L G V I V A F A I    | m.Dnaad methionine | 165.95 | 405.3252 | 1807.971 | -0.0094   | -5.4  | 5.6  | 31075.7  | 5.65 | HUMAN | 610074 | Cytosolic dynein 1 heavy chain 1                             |
| 21154 | dirMS_041712_NAR_30mM_plus2.9681.9681.2    | 2 | 5.21 | 0.138E+06        | (R)QLSSV(R) (R) L S V S Y V S E (Y)R(H)             | m.Dnaad methionine | 140.0  | 538.2855 | 1075.574 | -0.105    | -9.8  | 6    | 20576.9  | 9.84 | HUMAN | FBW04  | Heat shock protein beta-1                                    |
| 21155 | dirMS_041712_NAR_40mM_plus2.11581.11581.2  | 2 | 5.21 | 0.217E+05        | (R)JNLSVA(R) (R) L S V A / S Y A (K)                | m.Dnaad methionine | 134.93 | 454.2649 | 907.525  | -0.0022   | -2.4  | 8.59 | 18789.1  | 6.77 | HUMAN | AZ1802 | 14-3-3 protein eta (Fragment)                                |
| 21156 | dirMS_041712_NAR_40mM_plus2.19276.19276.3  | 3 | 5.21 | 0.175E+05        | (R)ILQDGL(R) (R) Q D A Q L V P I A I F I K P K I S  | m.Dnaad methionine | 180.07 | 624.3737 | 1871.115 | -0.0088   | -4.7  | 9.7  | 94175.4  | 6.59 | HUMAN | GSU198 | Discs, large homolog 3 (Neuroendocrine-dig, Drosophila)      |
| 21157 | dirMS_041712_NAR_40mM_plus2.5312.5312.2    | 2 | 5.21 | 0.131E+06        | (R)IDYSG(R) (R) Y S G V Q I Q R I Q                 | m.Dnaad methionine | 87.43  | 444.6098 | 1885.385 | 0.0015    | 1.7   | 5.83 | 70523.3  | 4.94 | HUMAN | GV1553 | Caspr-1                                                      |
| 21158 | dirMS_041712_NAR_40mM_plus2.5381.5381.2    | 2 | 5.21 | 0.137E+05        | (R)IGSNG(R) (R) S N G A F V Y K A                   | m.Dnaad methionine | 89.07  | 427.2033 | 843.399  | -0.0002   | -0.3  | 8.59 | 66105.7  | 7.3  | HUMAN | AM808B | Fraxillin X homolog 3 (Neuroendocrine-dig, Drosophila)       |
| 21159 | dirMS_041712_NAR_50mM_plus2.10426.10426.2  | 2 | 5.21 | 1.753E+05        | (R)IDGKLV(R) (R) D / G L V E S S D V L P / K E      | m.Dnaad methionine | 122.85 | 137.3925 | 1473.78  | -0.0018   | -1.2  | 4.56 | 56607.4  | 5.37 | HUMAN | FBV084 | Keratin, type II cytoskeletal 8                              |
| 21160 | dirMS_041712_NAR_50mM_plus2.13020.13020.3  | 3 | 5.21 | 1.400E+05        | (K)DMESTP(K) (K) M I E S P T L K V L D T A K I D    | m.Dnaad methionine | 136.83 | 516.6001 | 1547.799 | -0.128    | -8.3  | 4.56 | 85679.3  | 7.65 | HUMAN | B9ZV1R | Microtubule-associated protein                               |
| 21161 | dirMS_041712_NAR_50mM_plus2.34865.34865.2  | 2 | 5.21 | 0.427E+05        | (R)IFACSA(R) (R) A C N I S A S L T V Y R I R        | m.Dnaad methionine | 102.73 | 524.8118 | 1246.615 | 0.001     | 0.8   | 9.75 | 23729.5  | 9.89 | HUMAN | CSZ17  | Non-POU domain-containing octamer-binding protein (Fragment) |
| 21162 | dirMS_041712_NAR_120mM_minus.11090.11090.3 | 3 | 5.2  | 0.310E+05        | (J)KCSFV(K) (K) C S F G V D / Q M / G R R           | m.Dnaad methionine | 114.05 | 413.885  | 1239.622 | -0.11     | 14.5  | 8.75 | 30682.5  | 9.45 | HUMAN | HOY355 | High affinity immunoglobulin gamma Fc receptor II (Fragment) |
| 21163 | dirMS_041712_NAR_120mM_minus.6235.6235.3   | 3 | 5.2  | 1.856E+03 K756k  | (K)ILS56G(K) (K) L S H V D / P Y / R K              | m.Dnaad methionine | 86.52  | 418.2064 | 1138.564 | 114.0353  | -6.1  | 8.5  | 244013.5 | 5.54 | HUMAN | QSTH69 | Brefeldin A-inhibited guanine nucleotide-exchange protein 3  |
| 21164 | dirMS_041712_NAR_120mM_minus.7430.7430.3   | 3 | 5.2  | 0.120E+05        | (R)INIDHEA(R) (R) N I D E / H A N E D V E R I M     | m.Dnaad methionine | 94.67  | 480.884  | 1440.635 | 0.0025    | 1.7   | 4.17 | 22768.7  | 7.94 | HUMAN | PH0262 | Ras-related protein Rab-10                                   |
| 21165 | dirMS_041712_NAR_30mM_plus2.11278.11278.2  | 2 | 5.2  | 0.208E+05        | (K)GHGGH(K) (K) E G H G S N G I Y K I Q             | m.Dnaad methionine | 114.72 | 616.3091 | 1231.807 | 0.0043    | 3.5   | 6.75 | 66446.9  | 7.94 | HUMAN | PH0824 | Steryl-sulfatase                                             |
| 21166 | dirMS_041712_NAR_30mM_plus2.19041.19041.2  | 2 | 5.2  | 0.168E+05        | (R)ISGSPV(R) (R) S G P V L Q G I L R K              | m.Dnaad methionine | 158.58 | 592.3428 | 1183.679 | -0.001    | -0.9  | 9.47 | 80859.6  | 6.43 | HUMAN | B4D196 | ATP-dependent RNA helicase DDX37                             |
| 21167 | dirMS_041712_NAR_30mM_plus2.7989.7989.2    | 2 | 5.2  | 0.183E+05        | (K)SSGAT(K) (K) S I G T / A E / V E L K I Q         | m.Dnaad methionine | 98.32  | 495.7528 | 990.51   | -0.1119   | -12   | 4.53 | 30947.9  | 6.47 | HUMAN | H3BQ34 | Pyruvate kinase                                              |
| 21168 | dirMS_041712_NAR_30mM_plus2.12933.12933.3  | 3 | 5.2  | 0.128E+05        | (K)IHTLSL(K) (K) I T L S T L Q V G S L V N Y K I Q  | m.Dnaad methionine | 141.7  | 537.3126 | 1609.927 | -0.0039   | -2.4  | 8.76 | 26760.1  | 8.93 | HUMAN | H3B9K3 | Hydroxyacylglutathione hydrolase, mitochondrial (Fragment)   |
| 21169 | dirMS_041712_NAR_30mM_plus2.12965.12965.3  | 3 | 5.2  | 0.235E+04 T14717 | (K)RDDDC(K) (K) D D D / L G I I E S L E A K I R     | m.Dnaad methionine | 141.45 | 612.9482 | 1633.78  | 203.0497  | -19.1 | 3.71 | 23493.8  | 5.45 | HUMAN | FBV173 | Myosin-10                                                    |
| 21170 | dirMS_041712_NAR_30mM_plus2.14161.14161.3  | 3 | 5.2  | 7.026E+04        | (R)YVDA(R) (R) V A F A L E G I L G V I V A F A I    | m.Dnaad methionine | 165.95 | 405.3252 | 1807.971 | -0.0094   | -5.4  | 5.6  | 31075.7  | 5.65 | HUMAN | 610074 | Cytosolic dynein 1 heavy chain 1                             |
| 21171 | dirMS_041712_NAR_60mM_plus2.1682.1682.3    | 3 | 5.2  | 1.255E+05        | (R)YRYPD(R) (R) Y R P D V I P D V I L A P I R K     | m.Dnaad methionine | 154.5  | 560.9843 | 1680.943 | -0.0048   | -2.9  | 5.96 | 96499.9  | 5.43 | HUMAN | FSH936 | Neutral alpha-galactosidase AB                               |
| 21172 | dirMS_041712_NAR_60mM_minus.19218.19218.3  | 3 | 5.2  | 0.335E+05        | (K)HGATV(K) (K) G A T V I L I T A / G M I K I Q     | m.Dnaad methionine | 170.82 | 450.939  | 1350.81  | -0.0079   | -5.9  | 8.76 | 8125.3   | 9.3  | HUMAN | BOQYF7 | Myoglobin (Fragment)                                         |
| 21173 | dirMS_041712_NAR_60mM_minus.6411.6411.3    | 3 | 5.2  | 1.175E+05        | (K)ITDEGG(K) (K) Y I D / G D D / G M K I R          | m.Dnaad methionine | 93.87  | 452.8686 | 1356.574 | 0.1716    | 13    | 4.03 | 21341.9  | 7.77 | HUMAN | Q5R370 | Calyculin binding protein                                    |
| 21174 | dirMS_041712_NAR_60mM_plus2.21162.21162.3  | 3 | 5.2  | 0.138E+05        | (R)YVDA(R) (R) V A F A L E G I L G V I V A F A I    | m.Dnaad methionine | 165.95 | 405.3252 | 1807.971 | -0.0094   | -5.4  | 5.6  | 31075.7  | 5.65 | HUMAN | 610074 | Cytosolic dynein 1 heavy chain 1                             |
| 21175 | dirMS_041712_NAR_20mM_plus.13966.13966.2   | 2 | 5.2  | 0.954E+04 M2232M | (R)SLLVNR(R) (R) L V M S P I E G P T L M R I R      | m.Dnaad methionine | 167.48 | 721.8852 | 1426.772 | 15.9909   | -2.8  | 5.72 | 276046.1 | 6.01 | HUMAN | PH4327 | Fatty acid synthase                                          |
| 21176 | dirMS_041712_NAR_30mM_plus2.16915.16915.3  | 3 | 5.2  | 0.502E+05 M313m  | (R)TVQSLR(R) (R) T V Q S L E I D / D S / M R I R    | m.Dnaad methionine | 142.1  | 508.2535 | 1506.747 | 15.9991   | 2.8   | 4.03 | 43773.3  | 5.26 | HUMAN | FBV219 | Keratin, type I cytoskeletal 18                              |
| 21177 | dirMS_041712_NAR_30mM_plus2.19577.19577.2  | 2 | 5.2  | 0.194E+05        | (K)NFSGK(K) (K) N F I S G A E L E / L G / R I R     | m.Dnaad methionine | 155.72 | 646.3361 | 1291.664 | -0.0008   | 0.6   | 4.53 | 71924.9  | 6.25 | HUMAN | B4D742 | Vesicle-fusing ATPase                                        |
| 21178 | dirMS_041712_NAR_30mM_plus2.21180.21180.2  | 2 | 5.2  | 0.181E+05        | (R)ITLDMV(R) (R) T L D M / W S A T W P K I Q        | m.Dnaad methionine | 165.72 | 674.8389 | 1348.672 | -0.0013   | -1    | 8.75 | 61018.6  | 9.45 | HUMAN | B4D106 | Probable ATP-dependent RNA helicase DDX5                     |
| 21179 | dirMS_041712_NAR_30mM_plus2.22326.22326.3  | 3 | 5.2  | 0.524E+05        | (R)IVGRC(K) (R) I V G R L A T S P F P A I S R I R   | m.Dnaad methionine | 117.2  | 508.9306 | 1524.781 | -0.0033   | -2.1  | 5.97 | 75454.5  | 6.74 | HUMAN | PH0262 | ATP-dependent RNA helicase DDX37                             |
| 21180 | dirMS_041712_NAR_30mM_plus2.5861.5861.2    | 2 | 5.2  | 0.194E+05        | (R)IVSEYR(K) (R) I V S E Y Q I K I Q                | m.Dnaad methionine | 85.45  | 433.7137 | 866.462  | -0.0057   | -6.6  | 5.97 | 12626.3  | 5.59 | HUMAN | Q5TR80 | N-acetylneuraminic acid synthase (Fragment)                  |
| 21181 | dirMS_041712_NAR_30mM_plus2.8099.8099.2    | 2 | 5.2  | 0.309E+05        | (R)MITYSPAR(R) (R) M I Y S P A R Y K                | m.Dnaad methionine | 95.77  | 444.2085 | 887.408  | 0.0017    | 1.9   | 8.35 | 32085.2  | 8.93 | HUMAN | B4D708 | Heterogeneous nuclear ribonucleoproteins C1/C2               |
| 21182 | dirMS_041712_NAR_40mM_plus2.16246.16246.3  | 3 | 5.2  | 0.272E+05        | (K)MIVKPK(K) (K) M I V K P V P I E V I L N K I Q    | m.Dnaad methionine | 161.6  | 569.6778 | 1707.024 | -0.0049   | -2.9  | 8.56 | 73146.9  | 5.45 | HUMAN | EP9121 | Hypoxia up-regulated protein 1 (Fragment)                    |
| 21183 | dirMS_041712_NAR_40mM_plus2.17438.17438.2  | 2 | 5.2  | 0.152E+05        | (R)YVDA(R) (R) V A F A L E G I L G V I V A F A I    | m.Dnaad methionine | 165.95 | 405.3252 | 1807.971 | -0.0094   | -5.4  | 5.6  | 31075.7  | 5.65 | HUMAN | 610074 | Cytosolic dynein 1 heavy chain 1                             |
| 21184 | dirMS_041712_NAR_50mM_plus2.10580.10580.3  | 3 | 5.2  | 1.225E+04        | (R)IMQKTF(R) (R) M Q K E I T A L A P S / T M K I Q  | m.Dnaad methionine | 123    | 516.9418 | 1548.812 | -0.0016   | -1    | 8.35 | 26616.9  | 5.18 | HUMAN | AM1676 | Actin, alpha skeletal muscle                                 |
| 21185 | dirMS_041712_NAR_50mM_plus2.12306.12306.3  | 3 | 5.2  | 1.320E+05        | (K)ILSAEKV(K) (K) L S A E K V I E A L T R I E K I Q | m.Dnaad methionine | 132.33 | 471.1133 | 1430.821 | -0.002    | -1.4  | 6.14 | 26661.1  | 7.81 | HUMAN | HOY169 | Protosoma subunit alpha type (Fragment)                      |
| 21186 | dirMS_041712_NAR_50mM_plus2.14172.14172.3  | 3 | 5.2  | 1.104E+06        | (K)IALQGG(K) (K) A L Q G V L E / L E / K E K I Q    | m.Dnaad methionine | 142.23 | 509.3022 | 1525.895 | -0.0028   | -1.8  | 6.18 | 26616.1  | 5.68 | HUMAN | EP9P10 | Epilipkin                                                    |
| 21187 | dirMS_041712_NAR_50mM_plus2.14191.14191.3  | 3 | 5.2  | 0.538E+05        | (K)YTVNAR(K) (K) Y T V N A R V A F N D A I Q R I Q  | m.Dnaad methionine | 142.7  | 528.9955 | 1407.901 | -0.0028   | 0.4   | 6.71 | 72445.7  | 5.97 | HUMAN | EP1021 | 78 kDa glucose-regulated protein                             |
| 21188 | dirMS_041712_NAR_50mM_plus2.21331.21333.3  | 3 | 5.2  | 1.525E+05 M145m  | (R)GVMLA(R) (R) V M L A V D A V A A E L K I Q       | m.Dnaad methionine | 182.27 | 524.9717 | 1556.908 | 15.9925   | -1.5  | 6.07 | 25252.7  | 9.52 | HUMAN | FT594  | 60 kDa heat shock protein, mitochondrial (Fragment)          |
| 21189 | dirMS_041712_NAR_50mM_plus2.9812.9812.3    | 3 | 5.2  | 1.196E+05        | (K)GAAPN(K) (K) G A A P N V V Y T V A I R K I Q     | m.Dnaad methionine | 115.35 | 499.5943 | 1496.786 | -0.0173   | -11.5 | 9.7  | 11682.5  | 3.98 | HUMAN | FBW084 | Cleavage and polyadenylation-specificity factor subunit 6    |
| 21190 | dirMS_0                                    |   |      |                  |                                                     |                    |        |          |          |           |       |      |          |      |       |        |                                                              |

|       |                                            |   |      |                 |                                                                             |        |          |          |          |       |      |          |       |       |        |                                                                                 |
|-------|--------------------------------------------|---|------|-----------------|-----------------------------------------------------------------------------|--------|----------|----------|----------|-------|------|----------|-------|-------|--------|---------------------------------------------------------------------------------|
| 21251 | dirMS_041712_NAR_60mM_minus.19272.19272.3  | 3 | 5.17 | 0.335E+05       | (KHGATV) (KH) G A T V L T A / V G / I G / K (K)                             | 170.82 | 450.939  | 1350.81  | -0.0079  | -5.9  | 8.76 | 8125.3   | 9.3   | HUMAN | BQCVF7 | Myoglobin (Fragment)                                                            |
| 21252 | dirMS_041712_NAR_120mM_plus.6489.6489.2    | 0 | 5.17 | 0.524E+05 M46m  | (RHGVDM) (RV) Q I G I M V V G M G Q (K)                                     | 87.48  | 594.288  | 1171.571 | 15.9593  | 0.3   | 8.76 | 32616.5  | 5.18  | HUMAN | ABN176 | Actin, alpha skeletal muscle                                                    |
| 21253 | dirMS_041712_NAR_120mM_plus.9556.9556.2    | 0 | 5.17 | 0.540E+05 G57y  | (KIDLRN) (K) D I L Y F V M A S W E I (K)                                    | 101.28 | 411.517  | 1071.467 | -0.0021  | -2.1  | 9.7  | 24633.7  | 6.29  | HUMAN | F5C0P3 | Serine/threonine protein phosphatase 2A 55 kDa regulatory subunit gamma isoform |
| 21254 | dirMS_041712_NAR_20mM_plus.11068.11068.2   | 0 | 5.17 | 0.202E+04       | (LH8) (KMS) (KV) Q I / T S / N Q / P / L (K)                                | 148.5  | 602.86   | 1240.726 | -0.0132  | -10.7 | 8.72 | 17549.1  | 10.39 | HUMAN | AB0193 | DBIRD coiled-coil domain-containing protein 4                                   |
| 21255 | dirMS_041712_NAR_20mM_plus.14737.14737.2   | 0 | 5.17 | 0.176E+04       | (R)JASLEA) (R) S A L E A A / V A / D A / E I (Q) (K)                        | 17.07  | 6.82477  | 1344.675 | 0.0007   | 0.5   | 4.14 | 56607.4  | 5.37  | HUMAN | F8V0B4 | Keratin, type II cytoskeletal 8                                                 |
| 21256 | dirMS_041712_NAR_20mM_plus.18184.18184.2   | 0 | 5.17 | 0.134E+04       | (K)ADIUFTT) (K) A / V / T / T A I A I (L) (K)                               | 197.1  | 551.8073 | 1106.609 | -0.0019  | -1.7  | 4.21 | 18141.9  | 4.7   | HUMAN | F6V0H7 | Hs70-interacting protein (Fragment)                                             |
| 21257 | dirMS_041712_NAR_20mM_plus.3607.3607.2     | 0 | 5.17 | 2.110E+05       | (K)ESPPAK) (K) V S / P / V A G S E S (K) (E)                                | 128.67 | 484.7737 | 982.542  | -0.0021  | -2.1  | 9.7  | 24633.7  | 6.29  | HUMAN | F5C0P3 | Serine/threonine protein phosphatase 2A 55 kDa regulatory subunit gamma isoform |
| 21258 | dirMS_041712_NAR_20mM_plus.9417.9417.2     | 0 | 5.17 | 0.669E+04       | (K)ITGEGV) (K) T G Q / E / P / V N V R (F) (K)                              | 135.25 | 556.8027 | 1112.606 | -0.0077  | -6.9  | 5.66 | 28051.5  | 4.98  | HUMAN | 3J0K12 | Cytosolic non-specific dipeptidase (Fragment)                                   |
| 21259 | dirMS_041712_NAR_20mM_plus.9634.9634.2     | 0 | 5.17 | 0.120E+05       | (K)IVAGQQ) (K) V / A / G / D / G / S / V / V (F) (K)                        | 138.03 | 617.8225 | 1234.643 | -0.0049  | -4    | 5.81 | 17127.4  | 10.05 | HUMAN | ABMU27 | Small ubiquitin-related modifier 3                                              |
| 21260 | dirMS_041712_NAR_30mM_plus.21628.21628.2   | 0 | 5.17 | 0.134E+05       | (K)VEALAE) (K) E V / A / E / L / E / A / L (K)                              | 168.87 | 636.3523 | 1271.684 | 0.0132   | 10.4  | 4.09 | 56522.6  | 6.66  | HUMAN | B4D7V3 | Phosphoenolpyruvate carboxykinase (GTP), mitochondrial                          |
| 21261 | dirMS_041712_NAR_30mM_plus.21705.21705.2   | 0 | 5.17 | 0.133E+05       | (K)NSIACL) (K) V S / L / V / Q / V / L / Q / S / A / R (A)                  | 170.78 | 707.8889 | 1414.765 | 0.0057   | 4     | 5.84 | 5111     | 6.44  | HUMAN | B4D6E4 | Programmed cell death protein 5                                                 |
| 21262 | dirMS_041712_NAR_30mM_plus.7548.7548.2     | 0 | 5.17 | 0.134E+05       | (K)MSEAL) (K) M / V / A / F / P / T / K (F) (K)                             | 91.75  | 401.24   | 1012.4   | 0.0035   | 1.5   | 4.17 | 90316.8  | 6.13  | HUMAN | CL1383 | Transcription intermediary factor 4-beta                                        |
| 21263 | dirMS_041712_NAR_40mM_plus.12074.12074.2   | 0 | 5.17 | 0.940E+04       | (R)NFDELIR) (R) F / D / L / R / V (K)                                       | 136.52 | 453.7354 | 906.468  | -0.0044  | -4.9  | 4.37 | 25148.6  | 6     | HUMAN | P30041 | Peroxiredoxin-6                                                                 |
| 21264 | dirMS_041712_NAR_50mM_plus.6111.6111.3     | 0 | 5.17 | 0.125E+05       | (R)JSGSDM) (R) S G S M / D / P / S G / A / H / P / S / V / R (Q)            | 96.5   | 462.214  | 1384.627 | 0.0001   | 0     | 6.46 | 48340.6  | 8.84  | HUMAN | Q07666 | KH domain-containing, RNA-binding, signal transduction-associated protein 1     |
| 21265 | dirMS_041712_NAR_60mM_plus.10316.10316.3   | 0 | 5.17 | 0.138E+05       | (K)ITAVCE) (K) T / V A / V / C / D / P / P / K / G (M) (K)                  | 111.95 | 442.9125 | 1326.72  | 0.0011   | 2.3   | 8.41 | 50199.4  | 4.75  | HUMAN | ABNN22 | Tubulin beta-8 chain-like protein LOC206334                                     |
| 21266 | dirMS_041712_NAR_120mM_minus.15999.15999.4 | 4 | 5.16 | 1.372E+05       | (K)AGSAG) (K) G S M A / Q / P / L / D / G / D / F / R (M) (K)               | 141.33 | 472.7464 | 1388.907 | -0.0016  | -0.8  | 4.56 | 15002.8  | 9.1   | HUMAN | FTXV20 | Unconventional myosin-VI                                                        |
| 21267 | dirMS_041712_NAR_20mM_minus.9440.9440.3    | 0 | 5.16 | 0.118E+04 M175m | (R)LEGGOL) (R) E O G G / A / V / D / L / M / P / A / F / E (K)              | 144.5  | 558.2794 | 1056.826 | 15.9975  | 1.5   | 4.03 | 20039.2  | 6.44  | HUMAN | HOY1G0 | Creatine kinase B-type (Fragment)                                               |
| 21268 | dirMS_041712_NAR_30mM_minus.14772.14772.2  | 0 | 5.16 | 0.315E+05       | (K)FVMEQI) (K) F V I M / Q / E / F / S (R) (K)                              | 133.63 | 586.7762 | 1172.541 | 0.0047   | 4     | 4.53 | 53361.8  | 6.42  | HUMAN | G5EA52 | Protein disulfide isomerase family A, member 3, isoform CRA_b                   |
| 21269 | dirMS_041712_NAR_30mM_minus.16660.16660.2  | 0 | 5.16 | 0.241E+05       | (K)NAGAG) (K) N A / A / G / A / L / D / L / K (E) (K)                       | 144.1  | 493.2881 | 985.568  | 0.0013   | 1.3   | 5.84 | 13786.8  | 9.33  | HUMAN | B74541 | Transcription elongation factor A, member 3                                     |
| 21270 | dirMS_041712_NAR_30mM_minus.6316.6316.2    | 0 | 5.16 | 0.162E+05       | (K)MGAASE) (K) M / G / A / S / V / E / R (K) (K)                            | 88.65  | 463.7074 | 906.408  | -0.0001  | -4.5  | 5.75 | 32745.6  | 4.54  | HUMAN | Q9P748 | Nucleohistomin                                                                  |
| 21271 | dirMS_041712_NAR_50mM_minus.12784.12784.3  | 0 | 5.16 | 0.394E+05       | (K)SLTAGK) (K) S L / A / T / G G N / V S / Q / A / L / V / G / K (A)        | 140.23 | 572.315  | 1714.933 | -0.0004  | -4.2  | 5.72 | 163852.7 | 5.43  | HUMAN | C3U9N9 | Vascular protein sorting-associated protein 8 homolog                           |
| 21272 | dirMS_041712_NAR_50mM_minus.16752.16752.3  | 0 | 5.16 | 1.828E+04       | (K)JAAIPTS) (K) A / A / V / L / P / T S / F / I / T / A / L / V / G (K)     | 164.08 | 506.3077 | 1516.91  | -0.0012  | -0.8  | 10   | 61676.9  | 5.5   | HUMAN | B4D7V0 | Protein arginine N-methyltransferase 5                                          |
| 21273 | dirMS_041712_NAR_60mM_minus.7677.7677.3    | 0 | 5.16 | 1.565E+05       | (R)JYVAVH) (R) V / A / L / E / V / A / G / D / G / D / K (K) (K)            | 102.07 | 427.222  | 1279.653 | -0.0104  | -1.1  | 4.56 | 19186.1  | 4.48  | HUMAN | B4D256 | 14-3-3 protein zeta/delta                                                       |
| 21274 | dirMS_041712_NAR_120mM_plus.21971.21971.4  | 0 | 5.16 | 2.453E+05 M145m | (R)YRVEHU) (R) R G V / M / L / V / A / V / A / I / E / L / K (K) (Q)        | 166.22 | 433.0059 | 1713.009 | 15.9926  | 1.3   | 8.59 | 25225.7  | 9.52  | HUMAN | E7E9H4 | 60 kDa heat shock protein, mitochondrial (Fragment)                             |
| 21275 | dirMS_041712_NAR_120mM_plus.7971.7971.2    | 0 | 5.16 | 0.136E+05       | (K)KVPKW) (K) P / W / V / M / W / R (D) (K)                                 | 95.12  | 461.7364 | 922.464  | 0.0013   | 1.4   | 9.75 | 14844.8  | 8.99  | HUMAN | AB0193 | GTP-binding nuclear protein Ran                                                 |
| 21276 | dirMS_041712_NAR_20mM_plus.18179.18179.2   | 0 | 5.16 | 0.983E+04       | (R)APGSGI) (R) A / P / G S / G L / A / L / I / P / L (K) (K)                | 196.67 | 568.5848 | 1136.704 | -0.0014  | -1.3  | 8.8  | 266161   | 5.68  | HUMAN | E9PPU0 | Epiplakin                                                                       |
| 21277 | dirMS_041712_NAR_20mM_plus.11480.11480.2   | 0 | 5.16 | 0.302E+05       | (R)JNGDFR) (R) N G / D / F / L / P / T / R (K) (K)                          | 113.7  | 460.2391 | 919.463  | 0.0077   | 8.4   | 5.84 | 21953.7  | 6.6   | HUMAN | ABPVX3 | 26S proteasome non-ATPase regulatory subunit 4 (Fragment)                       |
| 21278 | dirMS_041712_NAR_30mM_plus.15987.15987.2   | 0 | 5.16 | 0.620E+05       | (R)IQDALL) (R) I / Q / A / L / A / G / L / E / L / R (K) (K)                | 137.1  | 521.7961 | 1042.589 | -0.0042  | -4    | 4.53 | 53377.8  | 5.74  | HUMAN | Q15149 | Plectin                                                                         |
| 21279 | dirMS_041712_NAR_30mM_plus.16659.16659.2   | 0 | 5.16 | 0.332E+05       | (K)SGLTQI) (K) S / L / G / T / Q / I / M / D / L / R (K) (K)                | 140.34 | 571.21   | 1144.611 | -0.0036  | -1.4  | 3.31 | 11451.6  | 6.15  | HUMAN | F5H055 | Protein transport protein Sec23A                                                |
| 21280 | dirMS_041712_NAR_30mM_plus.17903.17903.2   | 0 | 5.16 | 0.124E+05       | (R)IANSAG) (R) N / S A / N / G / L / E / R (K) (K)                          | 147.32 | 529.8026 | 1058.584 | 0.0139   | 13.1  | 6    | 40159.7  | 6.47  | HUMAN | F5H1G5 | Ligase system-associated membrane protein                                       |
| 21281 | dirMS_041712_NAR_30mM_plus.21876.21876.2   | 0 | 5.16 | 0.103E+05       | (K)NFFYLR) (K) N / F / Y / L / F / E / M / N / T / R (L) (K)                | 170.5  | 667.8205 | 1334.62  | 0.0139   | 10.4  | 6    | 80685.1  | 7.31  | HUMAN | PO5165 | Propionyl-CoA carboxylase alpha chain, mitochondrial                            |
| 21282 | dirMS_041712_NAR_30mM_plus.8474.8474.2     | 0 | 5.16 | 0.792E+05       | (K)ITAVCE) (K) T / V A / V / C / D / P / P / R (K) (K)                      | 99.28  | 514.7643 | 1028.519 | 0.0027   | 1.9   | 5.5  | 50199.4  | 4.75  | HUMAN | ABNN22 | Tubulin beta-8 chain-like protein LOC206334                                     |
| 21283 | dirMS_041712_NAR_30mM_plus.7957.7957.2     | 0 | 5.16 | 0.506E+05       | (R)HIGEGE) (R) H / I / G / E / G / E / S / V / E / R (K) (K)                | 102.72 | 484.7983 | 1288.559 | -0.0027  | -2.6  | 4.52 | 24633.7  | 6.29  | HUMAN | Q07666 | KH domain-containing, RNA-binding, signal transduction-associated protein 1     |
| 21284 | dirMS_041712_NAR_50mM_plus.21016.21016.3   | 0 | 5.16 | 0.424E+06       | (R)JAGKPV) (R) J A G K P / V / C A T / I / Q / M / L / E / M / T / K (K)    | 179.77 | 626.3278 | 1876.969 | -0.0005  | -0.3  | 8.64 | 18466.1  | 5.78  | HUMAN | H3BSU3 | Pyruvate kinase (Fragment)                                                      |
| 21285 | dirMS_041712_NAR_50mM_plus.8200.8200.3     | 0 | 5.16 | 1.795E+04       | (R)TGDEK) (R) T / G / E / L / R / E / E / M / E / K (K) (K)                 | 109.95 | 578.9478 | 1734.839 | -0.0104  | -6    | 4.25 | 172185.3 | 7.06  | HUMAN | P07814 | Bifunctional glutamate/proline-199Aa ligase                                     |
| 21286 | dirMS_041712_NAR_60mM_plus.17360.17360.3   | 0 | 5.16 | 1.672E+05       | (R)KILDELE) (R) K / L / D / L / A / I / L / L / K (K) (K)                   | 147.78 | 415.2483 | 1243.726 | 0.0047   | 3.8   | 6.07 | 23738.5  | 5.83  | HUMAN | B4DRA3 | Prelamin-A/C                                                                    |
| 21287 | dirMS_041712_NAR_60mM_plus.19291.19291.3   | 0 | 5.16 | 0.502E+04       | (K)YVSLKH) (K) V S / L / K / H / V / I / N / V / T / F / T / R (G) (K)      | 159.5  | 524.6233 | 1571.854 | 0.0013   | 0.8   | 6.71 | 61769.5  | 5.5   | HUMAN | P53579 | Myosin-9                                                                        |
| 21288 | dirMS_041712_NAR_120mM_minus.13580.13580.3 | 0 | 5.15 | 0.783E+04       | (K)SLGTYK) (K) S / L / G / T / Y / K / S / V / A / G / L / R (K) (K)        | 128.13 | 425.623  | 1274.685 | -0.0126  | -10.1 | 8.63 | 67446.5  | 5.63  | HUMAN | F8V0E1 | LM domain and actin-binding protein 1                                           |
| 21289 | dirMS_041712_NAR_120mM_minus.9432.9432.2   | 0 | 5.15 | 0.788E+05       | (K)STITVA) (K) S / T / I / T / V / A / E / V / S / G (K) (K)                | 106.33 | 603.311  | 1205.626 | -0.0111  | -9.2  | 3.79 | 16755.8  | 5.07  | HUMAN | HOY1M7 | Copine-6 (Fragment)                                                             |
| 21290 | dirMS_041712_NAR_20mM_minus.11583.11583.2  | 0 | 5.15 | 0.803E+04       | (R)JATLVY) (R) J A T / L / V / I / T / A / E / D / R (Q) (K)                | 162.37 | 626.3282 | 1251.658 | -0.0088  | -7    | 4.37 | 24376.8  | 6.08  | HUMAN | E9PIK6 | Protein arginine N-methyltransferase 1 (Fragment)                               |
| 21291 | dirMS_041712_NAR_30mM_plus.15957.15957.2   | 0 | 5.15 | 0.779E+04       | (K)IGLWV) (K) I / G / W / V / E / G / C / L (K) (K)                         | 145.05 | 531.2806 | 1061.545 | 0.0091   | 8.6   | 6    | 14914.1  | 6.84  | HUMAN | P23598 | 40Y ribonucleoprotein 512                                                       |
| 21292 | dirMS_041712_NAR_30mM_plus.8404.8404.2     | 0 | 5.15 | 0.840E+04       | (K)KQVY) (K) K / Q / V / Y / L / S / L / V / L / R (K) (K)                  | 108.65 | 480.799  | 989.328  | -0.004   | -4.4  | 8.72 | 21953.7  | 6.47  | HUMAN | Q07666 | KH domain-containing, RNA-binding, signal transduction-associated protein 1     |
| 21293 | dirMS_041712_NAR_40mM_minus.12718.12718.3  | 0 | 5.15 | 0.238E+04 S21s  | (K)VLVMS) (K) V / L / V / M / S / S / V / S / L / P / W / N / R (F)         | 158.45 | 620.659  | 1656.864 | 203.0979 | 10    | 9.72 | 16871.7  | 5.47  | HUMAN | HOY1A2 | N-acyl-phosphatidylethanolamine-hydrolyzing phospholipase D (Fragment)          |
| 21294 | dirMS_041712_NAR_50mM_minus.9617.9617.3    | 0 | 5.15 | 0.173E+05 M32m  | (K)MKSNM) (K) M / S / N / M / G / H / P / E / L / S / A / L / A / A / V (K) | 122.73 | 556.279  | 1050.827 | 15.9956  | 0.4   | 6.47 | 276046.1 | 6.01  | HUMAN | AB9327 | Fatty acid synthase                                                             |
| 21295 | dirMS_041712_NAR_60mM_plus.15682.15682.3   | 0 | 5.15 | 1.098E+05 M332m | (R)AKTEEA) (R) A / K / V / E / E / L / M / D / F / R (S) (K)                | 147.6  | 510.255  | 1512.752 | 15.9989  | 2.6   | 4.68 | 72445.7  | 5.07  | HUMAN | P11021 | 78 kDa glucose-regulated protein                                                |
| 21296 | dirMS_041712_NAR_120mM_plus.7228.7228.4    | 0 | 5.15 | 0.658E+05       | (R)HIGEGE) (R) H / I / G / E / G / E / S / V / E / R (K) (K)                | 91.42  | 444.9633 | 1778.833 | -0.0023  | -11.1 | 5.32 | 133979.8 | 6.08  | HUMAN | Q06510 | Glycine-rich domain 1                                                           |
| 21297 | dirMS_041712_NAR_30mM_plus.12580.12580.2   | 0 | 5.15 | 0.586E+05       | (R)ISGLPL) (R) S / G / V / L / P / Q / T / R (A) (K)                        | 118.18 | 497.2641 | 993.525  | -0.0042  | -4.2  | 5.55 | 17045.4  | 4.25  | HUMAN | HOY1V0 | Endoplasmic reticulum (Fragment)                                                |
| 21298 | dirMS_041712_NAR_30mM_plus.6570.6570.2     | 0 | 5.15 | 0.472E+05       | (R)SPNDPN) (R) S / P / D / N / P / M / N / R (K) (K)                        | 88.83  | 529.7357 | 1058.468 | -0.0042  | -4    | 5.55 | 25834.8  | 9.45  | HUMAN | Q06C77 | Colicid-coiled-coil-containing protein 124                                      |
| 21299 | dirMS_041712_NAR_40mM_plus.17012.17012.3   | 0 | 5.15 | 0.126E+05       | (R)KILVLS) (R) L / E / L / V / L / S / E / L / P / K / P / T (K) (K)        | 165.95 | 546.3323 | 1636.988 | -0.0008  | -3.7  | 6.14 | 13611    | 6.13  | HUMAN | E9P222 | Spectrin beta chain, non-erythrocytic T2 (Fragment)                             |
| 21300 | dirMS_041712_NAR_60mM_plus.19580.19580.3   |   |      |                 |                                                                             |        |          |          |          |       |      |          |       |       |        |                                                                                 |







|       |                                            |   |      |                  |                                                  |                           |         |          |          |          |      |      |          |             |        |                                                                             |
|-------|--------------------------------------------|---|------|------------------|--------------------------------------------------|---------------------------|---------|----------|----------|----------|------|------|----------|-------------|--------|-----------------------------------------------------------------------------|
| 21578 | dirMS_041712_NAR_60mM_minus.5151.5151.3    | 3 | 5.02 | 1.294E-03        | (K)TSSDPT(K)T S/D/P T/V C K/E(K/V)               | C.carbonimidomethylation  | 82.53   | 460.8816 | 1380.631 | -0.0009  | -0.6 | 4.68 | 15390.6  | 7.96 HUMAN  | C3673  | Exportin-1 (Fragment)                                                       |
| 21579 | dirMS_041712_NAR_60mM_minus.978.984.3      | 3 | 5.02 | 1.794E-05        | (K)TLTEPQ(K)T L/E/D/P/L/V N R V(R)               |                           | 114.83  | 443.2407 | 1327.697 | 0.0111   | 8.4  | 4.55 | 13984.9  | 5.52 HUMAN  | Q86V96 | Cullin-associated NEDD8-dissociated protein 1                               |
| 21580 | dirMS_041712_NAR_120mM_plus.4160.4160.2    | 3 | 5.02 | 1.445E-05 M310m  | (K)TSTSTT(K)T E/L/V/L/V/L/Q/L V(K)               | m.Oxidized methionine     | 6.9     | 1.8157   | 1201.529 | 0.0009   | 5.6  | 6    | 5042.9   | 5.53 HUMAN  | HY0147 | Keratin, type II cytoskeletal class I                                       |
| 21581 | dirMS_041712_NAR_120mM_plus.4526.4526.3    | 3 | 5.02 | 0.596E-05        | (K)SRRG(R)T H/S Q/G/V/G/V(G) G/V(Y/V)            |                           | 74.03   | 457.2002 | 1369.613 | -0.0001  | -0.1 | 8.2  | 54213.9  | 7.73 HUMAN  | B4E363 | Phenylalanine-tRNA ligase alpha subunit                                     |
| 21582 | dirMS_041712_NAR_20mM_plus.10466.10466.2   | 3 | 5.02 | 0.188E-05 M529m  | (R)mGPAM(R)m G/P A m(G)P A/L/G A G E(K)          | m.Oxidized methionine     | 144.75  | 370.3568 | 1427.313 | 31.993   | 2.1  | 5.75 | 77799.7  | 9.09 HUMAN  | PS2272 | Heterogeneous nuclear ribonucleoprotein M                                   |
| 21583 | dirMS_041712_NAR_20mM_plus.15614.15614.3   | 3 | 5.02 | 0.877E-03        | (R)SSPVM(R)S F V V N(G)L/V/L/G G G(K)            |                           | 179.37  | 490.9251 | 1470.759 | 0.0002   | 1.4  | 8.31 | 17630.6  | 11.62 HUMAN | IL3305 | Profilin-1 (Fragment)                                                       |
| 21584 | dirMS_041712_NAR_20mM_plus.18403.18403.3   | 3 | 5.02 | 0.758E-04        | (K)TSSALV(R)S F A L/V/L/V/T/L Q/L V(K)           |                           | 158.28  | 514.3762 | 1525.21  | 0.0039   | 4.5  | 6    | 5042.9   | 5.53 HUMAN  | HY0147 | Cullin-associated NEDD8-dissociated protein 1 (Fragment)                    |
| 21585 | dirMS_041712_NAR_40mM_plus2.20016.20016.3  | 3 | 5.02 | 1.556E-05        | (K)EGGLG(K)E G G L/E/G V/L/V/L V L D V T R(L)    |                           | 189.75  | 613.0288 | 1893.076 | -0.0041  | -2.2 | 6.17 | 15252.2  | 5.82 HUMAN  | AN6W5  | Peroxiredoxin 2, isoform CRA_9                                              |
| 21586 | dirMS_041712_NAR_50mM_plus2.10295.10295.3  | 3 | 5.02 | 2.317E-04 Y831y  | (K)LSGEEH(R)S L G E/L/V/L/V/L V L E T R(L)       | y.Phosphorylation 1       | 121.53  | 658.3369 | 1893.008 | 79.9885  | 11.3 | 4.95 | 27403.1  | 5.39 HUMAN  | Q10182 | Spectrin beta chain, non-erythrocytic 1                                     |
| 21587 | dirMS_041712_NAR_50mM_plus2.12472.12472.3  | 3 | 5.02 | 1.629E-05 M32z   | (K)LLVDFD(R)K V L V F/D T L Q/V/K(A/K)           | y.Phosphorylation 5       | 137.97  | 486.2644 | 1376.815 | -79.9639 | -1.7 | 8.59 | 34254.3  | 4.79 HUMAN  | B4D077 | 5'-AMP-activated protein kinase subunit gamma-1                             |
| 21588 | dirMS_041712_NAR_50mM_plus2.19954.19954.3  | 3 | 5.02 | 0.109E-05        | (K)LLHPHS(R)K L H L/L/P/L/S/L T A L(L)           |                           | 173.43  | 440.2882 | 1315.846 | -0.0016  | -1.2 | 8.76 | 39982.4  | 8.94 HUMAN  | Q10B76 | Leucine-rich repeat-containing protein 1                                    |
| 21589 | dirMS_041712_NAR_60mM_plus.17153.17153.3   | 3 | 5.02 | 1.190E-05 M310m  | (K)KATETL(R)K F E/L/V/L/V/L/V L P(R)S            | m.Oxidized methionine     | 147.92  | 420.2556 | 1512.755 | 16.0008  | 8.9  | 4.68 | 72445.7  | 9.12 HUMAN  | P11275 | 78kD glucose-regulated protein                                              |
| 21590 | dirMS_041712_NAR_60mM_plus.5459.5459.3     | 3 | 5.02 | 0.417E-05 M21m   | (R)SGSDF(R)S G S/m/D/P/S G A H P S V(R)Q         | m.Oxidized methionine     | 86.32   | 467.5464 | 1384.627 | 15.9973  | 1.7  | 6.46 | 48340.6  | 8.84 HUMAN  | Q07666 | KH domain-containing, RNA-binding, signal transduction-associated protein 1 |
| 21591 | dirMS_041712_NAR_60mM_plus.5564.5564.3     | 3 | 5.02 | 1.235E-04        | (R)SGSDF(R)Y Y/G/G/S E/G G R A P(R)K             |                           | 86.05   | 431.5425 | 1298.612 | 0.0006   | 0.4  | 8.5  | 64759.2  | 8.88 HUMAN  | P14866 | Heterogeneous nuclear ribonucleoprotein C                                   |
| 21592 | dirMS_041712_NAR_120mM_minus.5485.5485.2   | 3 | 5.01 | 0.159E-05 M161m  | (R)RQDHLA(R)m Q/L/V/L A I(R)                     | m.Oxidized methionine     | 83.22   | 442.7426 | 1868.482 | 15.9958  | 1    | 9.52 | 18466.1  | 5.78 HUMAN  | H385U3 | Pyruvate kinase (Fragment)                                                  |
| 21593 | dirMS_041712_NAR_120mM_minus.9475.9475.3   | 3 | 5.01 | 0.170E-05        | (K)EFLNLE(K)F L L N L E/S/G/P S S(K)             |                           | 106.18  | 482.657  | 1446.655 | 0.0002   | 0.1  | 4.65 | 30992.3  | 4.14 HUMAN  | B28188 | Protein SET                                                                 |
| 21594 | dirMS_041712_NAR_20mM_minus.11643.11643.2  | 3 | 5.01 | 0.420E-05        | (R)IGALQM(R)S A/G/Q/V/L/V P A S T G A A(K)       |                           | 167.7   | 706.3976 | 1417.79  | -0.0024  | -1.7 | 8.75 | 31718.5  | 7.17 HUMAN  | F7E174 | Glyceraldehyde-3-phosphate dehydrogenase                                    |
| 21595 | dirMS_041712_NAR_20mM_minus.13867.13867.2  | 3 | 5.01 | 0.378E-05        | (K)VLTPELY(K)V L/T/P/L V E/L/A/L(R)A             |                           | 190.8   | 652.3653 | 1303.726 | -0.0023  | -1.8 | 4.53 | 14391.8  | 4.99 HUMAN  | G3V461 | Creatine kinase B-type (Fragment)                                           |
| 21596 | dirMS_041712_NAR_20mM_minus.15156.15156.2  | 3 | 5.01 | 0.347E-05        | (R)YPPNSV(R)P/P/V N S V N(L)K                    |                           | 136.42  | 573.8282 | 1146.652 | -0.0026  | -2.3 | 8.59 | 44227.3  | 7.81 HUMAN  | F7E086 | T-complex protein 1 subunit alpha                                           |
| 21597 | dirMS_041712_NAR_30mM_minus.5417.5417.2    | 3 | 5.01 | 0.937E-04        | (K)SGEVD(K)S D/V/S/D E A S(K)R                   |                           | 83.82   | 599.7632 | 1198.522 | -0.0031  | -2.6 | 4.83 | 32616.5  | 5.18 HUMAN  | AN6V76 | Actin, alpha skeletal muscle                                                |
| 21598 | dirMS_041712_NAR_50mM_minus2.18881.18881.3 | 3 | 5.01 | 1.209E-06        | (R)IULLEV(R)I L/V/L V L/S D Q(K)M                |                           | 183.8   | 461.6289 | 1382.873 | -0.0008  | -0.6 | 8.75 | 280326.9 | 5.48 HUMAN  | Q75369 | Filamin-8                                                                   |
| 21599 | dirMS_041712_NAR_50mM_minus2.6930.6930.3   | 3 | 5.01 | 0.213E-04        | (R)QSSGPK(R)Q S S/G/P/G A/S/G S D G H E L V R(I) |                           | 106     | 662.3147 | 1984.932 | -0.0023  | -1.2 | 5.32 | 20818.7  | 4.89 HUMAN  | E9P171 | Elongation factor 1-delta (Fragment)                                        |
| 21600 | dirMS_041712_NAR_50mM_minus2.8481.8481.3   | 3 | 5.01 | 1.413E-04 M88m   | (K)IADDM(K)K L/D/D m/I S T/L K(V)                | m.Oxidized methionine     | 116.17  | 417.5602 | 1234.671 | 15.9949  | 0    | 6    | 56186.7  | 5.47 HUMAN  | B4DUR8 | T-complex protein 1 subunit gamma                                           |
| 21601 | dirMS_041712_NAR_50mM_minus2.1155.1155.3   | 3 | 5.01 | 1.159E-05        | (K)KADPDL(K)K A/V/D/V/L A A G K D(E)R            |                           | 124.38  | 484.2432 | 1450.717 | -0.0002  | -1.5 | 4.32 | 4736.1   | 5.41 HUMAN  | AKR4K5 | AT1 homolog                                                                 |
| 21602 | dirMS_041712_NAR_50mM_minus2.1438.1438.3   | 3 | 5.01 | 0.854E-04 T13T1  | (R)KQDPR(R)K W/S/Q/V T V L E A M(R)              | m.N-acetylglucosamine (7) | 138.2   | 523.6467 | 1365.719 | 201.008  | 6.4  | 6.05 | 22384.9  | 9.36 HUMAN  | AMT023 | TGF-beta fusion partner                                                     |
| 21603 | dirMS_041712_NAR_20mM_plus.11525.11525.2   | 3 | 5.01 | 0.488E-04        | (K)QIAPDPS(K)Q I/A/P D S S/G L P E(R)S           |                           | 151.68  | 676.8596 | 1352.717 | -0.0049  | -3.6 | 4.37 | 70034.8  | 6.89 HUMAN  | B4D731 | Far upstream element-binding protein 1                                      |
| 21604 | dirMS_041712_NAR_20mM_plus.15590.15590.3   | 3 | 5.01 | 0.125E-05        | (R)IGNVPT(R)K N/P T/V E V D U/L/T T S(R)         |                           | 179.675 | 469.577  | 1406.716 | 0.0003   | 0.2  | 4.37 | 21077    | 9.05 HUMAN  | Y9M950 | Alpha-enolase (Fragment)                                                    |
| 21605 | dirMS_041712_NAR_20mM_plus.17005.17005.3   | 3 | 5.01 | 0.241E-05        | (K)YIDAAV(K)Q I/V A/V A N/Q/E L L C R(M)         |                           | 118.83  | 518.2975 | 1525.881 | -0.0026  | -1.7 | 5.97 | 10728.1  | 9.15 HUMAN  | Q9Y5L4 | Mitochondrial import inner membrane translocase subunit Tim13               |
| 21606 | dirMS_041712_NAR_20mM_plus2.1028.1028.2    | 3 | 5.01 | 0.755E-04        | (K)YIDAAV(K)Q I/V A/V A N/Q/E L L C R(M)         |                           | 118.83  | 518.2975 | 1525.881 | -0.0026  | -1.7 | 5.97 | 10728.1  | 9.15 HUMAN  | Q9Y5L4 | Mitochondrial import inner membrane translocase subunit Tim13               |
| 21607 | dirMS_041712_NAR_30mM_plus2.20225.20225.2  | 3 | 5.01 | 0.303E-05        | (R)ILTALM(R)I T/L A I/L N(R)                     |                           | 159.95  | 400.2728 | 799.544  | -0.0017  | -2.1 | 9.75 | 87478.1  | 6.43 HUMAN  | C91266 | EB1 ubiquitin-protein ligase RNF123                                         |
| 21608 | dirMS_041712_NAR_30mM_plus2.21386.21386.2  | 3 | 5.01 | 0.838E-04        | (K)SFYSGT(K)S F/G/S/T/L F L C(R)                 |                           | 166.78  | 675.8282 | 1350.651 | -0.0002  | -1.5 | 8.46 | 276046.1 | 6.01 HUMAN  | PA9327 | Fatty acid synthase                                                         |
| 21609 | dirMS_041712_NAR_40mM_plus2.10316.10316.2  | 3 | 5.01 | 0.940E-04        | (K)GGIDGT(K)K G/D/V/G T/V P V G V(R)             |                           | 125.75  | 513.3081 | 1025.611 | -0.0013  | -1.2 | 9.75 | 50482.3  | 9.31 HUMAN  | PE8104 | Elongation factor 1-alpha 1                                                 |
| 21610 | dirMS_041712_NAR_40mM_plus2.9717.9717.2    | 3 | 5.01 | 0.236E-05 S10B05 | (K)GGADSL(K)K A/V/S/L/S L S L I S L(R)           | m.N-acetylglucosamine (5) | 107.7   | 571.6318 | 1515.811 | 203.104  | 14.3 | 9.05 | 23011.9  | 6.83 HUMAN  | Q91263 | Hexameric associated transcription factor 3                                 |
| 21611 | dirMS_041712_NAR_50mM_plus2.11998.11998.3  | 3 | 5.01 | 0.185E-04        | (R)IDLEAF(R)D L/E A/E/H/V E/D/V/T/T L R(C)       |                           | 132.13  | 623.966  | 1869.882 | 0.0001   | 0.5  | 4.07 | 10027.3  | 8.44 HUMAN  | H3BTW0 | Uncharacterized protein (Fragment)                                          |
| 21612 | dirMS_041712_NAR_50mM_plus2.13198.13198.3  | 3 | 5.01 | 2.432E-05 T3311  | (K)SIFMDL(K)S F M D L A K E D X D N D(R)T        | y.Phosphorylation 5       | 153.18  | 659.9658 | 1897.896 | 79.9888  | 10.6 | 4.37 | 73117.8  | 5.33 HUMAN  | B4DHC4 | Cytosolic carboxypeptidase 1                                                |
| 21613 | dirMS_041712_NAR_50mM_plus2.20688.20688.3  | 3 | 5.01 | 1.70E-05         | (R)YISKFD(R)N/V N S/K F T/I/V L L K(R)           |                           | 117.62  | 561.3209 | 1681.952 | -0.0042  | -2.5 | 8.47 | 72626.7  | 9.13 HUMAN  | Q14258 | E3 ubiquitin/SGS1 ligase TRIM25                                             |
| 21614 | dirMS_041712_NAR_50mM_plus2.9143.9143.3    | 3 | 5.01 | 0.688E-04        | (R)ISSGSP(R)S G P/V P G G Q V F A K I(P)R        |                           | 175.35  | 545.6023 | 1628.782 | 0.0108   | 0.6  | 9.7  | 33588.7  | 9.13 HUMAN  | RVBQ17 | Heterogeneous nuclear ribonucleoprotein A1                                  |
| 21615 | dirMS_041712_NAR_50mM_plus2.12704.12704.3  | 3 | 5.01 | 0.454E-04        | (R)ISGDF(R)S G P/G F N A/H V A S(R)W             |                           | 121.93  | 482.2556 | 1474.755 | -0.0007  | -1.8 | 9.75 | 63760.3  | 6.01 HUMAN  | Q14773 | Triplicate repeat-peptide 1                                                 |
| 21616 | dirMS_041712_NAR_60mM_plus.18324.18324.3   | 3 | 5.01 | 0.787E-04        | (K)HSLGLL(R)H S L/L G/D/V Y P A(K)V              |                           | 153.02  | 507.607  | 1520.811 | -0.0043  | -2.8 | 6.74 | 71128.7  | 6.21 HUMAN  | BC0QY9 | Eukaryotic translation initiation factor 3 subunit L                        |
| 21617 | dirMS_041712_NAR_20mM_minus.12602.12602.2  | 3 | 5    | 0.231E-05 M185m  | (K)ILAVNm(K)K A/V/Nm/V/P P(R)                    | m.Oxidized methionine     | 173.62  | 580.3173 | 1143.634 | 15.9993  | -1.6 | 9.75 | 42230.8  | 4.77 HUMAN  | AN6X28 | Putative tubulin beta chain-like protein ENSP0000290377                     |
| 21618 | dirMS_041712_NAR_20mM_minus.13045.13162.2  | 3 | 5    | 0.387E-05 M355m  | (K)INDIANE(K)D A I/V I L N L E K(R)              |                           | 181.67  | 588.7948 | 1160.598 | 15.9843  | -9   | 4.37 | 28354    | 7.11 HUMAN  | B4DUX8 | 26S proteasome non-ATPase regulatory subunit 7                              |
| 21619 | dirMS_041712_NAR_20mM_minus.14648.14648.2  | 3 | 5    | 0.130E-05        | (R)WITL(R)K W/L T/L T A/E/R(E)                   |                           | 201.7   | 632.9107 | 1388.157 | 0.0017   | 0.7  | 8.75 | 20011.9  | 6.05 HUMAN  | Q91263 | Hexameric associated transcription factor 3                                 |
| 21620 | dirMS_041712_NAR_50mM_plus2.14625.14644.3  | 3 | 5    | 1.170E-06        | (K)AGTQIE(K)K A/G/T/Q/E I N D E F R D G L K(L)   |                           | 152     | 640.9832 | 1190.953 | 0.0003   | 2.8  | 4.11 | 58925.4  | 4.85 HUMAN  | FG552  | Alpha-actinin-4                                                             |
| 21621 | dirMS_041712_NAR_50mM_minus2.17871.17871.3 | 3 | 5    | 0.219E-05        | (R)ILGHLR(K)K G F H L P L E V(A/V) M Q(R)        |                           | 81.25   | 514.953  | 1542.843 | 0.0017   | 1.1  | 6.75 | 533778   | 5.74 HUMAN  | Q15149 | Plectin                                                                     |
| 21622 | dirMS_041712_NAR_120mM_plus.5332.5332.2    | 3 | 5    | 0.188E-05        | (K)YLPHSA(K)K P/H/P/S A C(R)Y                    |                           | 170.35  | 450.7388 | 900.469  | 0.0017   | 1.9  | 8.75 | 23047.2  | 9.95 HUMAN  | PA6782 | 40S ribosomal protein S5                                                    |
| 21623 | dirMS_041712_NAR_120mM_plus.9588.9588.3    | 3 | 5    | 1.369E-05        | (K)SGLSGL(K)S R S G R I/V P C L M(R)G            |                           | 102.8   | 455.5574 | 1364.659 | -0.0001  | -0.8 | 5.87 | 90316.8  | 5.52 HUMAN  | Q13363 | Transcription intermediate factor 1-beta                                    |
| 21624 | dirMS_041712_NAR_50mM_plus.7421.7421.2     | 3 | 5    | 0.799E-04        | (R)IGTSDA(R)S T F D/A/A/T/S G G S A S E(K)R      |                           | 119.65  | 815.8661 | 1630.719 | 0.0058   | 3.6  | 4.37 | 24273.5  | 8.88 HUMAN  | HY0K49 | Electron transfer flavoprotein subunit alpha, mitochondrial                 |
| 21625 | dirMS_041712_NAR_30mM_plus2.15442.15442.2  | 3 | 5    | 0.429E-05        | (R)YVFFTG(R)Y/V I F T G C P(K)A                  |                           | 133.38  | 567.2595 | 1133.508 | 2.903    | 2.9  | 8.59 | 46550.7  | 7.81 HUMAN  | B72C39 | Chaperonin containing TCP1, subunit 7 (Eta), isoform CRA_A                  |
| 21626 | dirMS_041712_NAR_30mM_plus2.5717.5717.2    | 3 | 5    | 0.134E-05 M57m   | (K)EMGTPE(K)K m/G T/P/D V(R)                     | m.Oxidized methionine     | 84.58   | 460.7158 | 904.419  | 16.0005  | 1.1  | 4.37 | 15175.4  | 10.46 HUMAN | B72AC8 | 60S ribosomal protein L31                                                   |
| 21627 | dirMS_041712_NAR_30mM_plus2.9899.9899.2    | 3 | 5    | 0.588E-05        | (K)EASSTP(K)K A/E/S S/P I V G S(T)K              |                           | 104.93  | 575.7726 | 1150.537 | 0.004    | 0.4  | 4.25 | 92752.5  | 4.76 HUMAN  | P14625 | Endoplasmic reticulum chaperone protein BiP                                 |
| 21628 | dirMS_041712_NAR_50mM_plus2.18133.18133.3  | 3 | 5    | 0.477E-05        | (K)YLSGDF(R)K D L E V/L V/L/V/L V L E F C(K)A    |                           | 168.33  | 658.4899 | 1966.994 | 79.9892  | 10.6 | 4.37 | 72626.7  | 9.13 HUMAN  |        |                                                                             |













|       |                                            |   |      |                      |                                                        |                            |        |          |          |           |       |      |          |       |       |         |                                                                 |
|-------|--------------------------------------------|---|------|----------------------|--------------------------------------------------------|----------------------------|--------|----------|----------|-----------|-------|------|----------|-------|-------|---------|-----------------------------------------------------------------|
| 22232 | dirMS_041712_NAR_60mM_plus.20652.20652.3   | 3 | 4.71 | 0.44E+05             | (R)ICPQGL(R)R P D Q L U G V I S L U L P L S E K        | C.CarbonBamH1              | 168.32 | 643.0146 | 1927.032 | -0.0025   | -1.3  | 6.07 | 533778   | 4.74  | HUMAN | Q51449  | Plectin                                                         |
| 22233 | dirMS_041712_NAR_60mM_plus.5611.5611.3     | 3 | 4.71 | 0.732E+04            | (K)AGPSL(K)IAA/GV/S L S/H/S F S G G T Q S K(V)         |                            | 87.67  | 495.9135 | 1485.729 | -0.0033   | -2.2  | 8.8  | 68764.6  | 6.96  | HUMAN | PZ7694  | Replication protein A 70 kDa DNA-binding subunit                |
| 22234 | dirMS_041712_NAR_120mM_plus.15073.15073.3  | 3 | 4.7  | 1.19E+05             | (R)HGLLSE(R)I L E A V A V A G V V G D E I Q I E(K)     | C.CarbonBamH1              | 199.53 | 501.2696 | 1084.991 | -0.0056   | -3.5  | 4.08 | 269254   | 5.12  | HUMAN | EP9904  | Yeast RNA polymerase III                                        |
| 22235 | dirMS_041712_NAR_120mM_minus.6074.6074.3   | 3 | 4.7  | 1.564E+05            | (K)ITCESE(K)T C E E S/N/S F T A E E L K(V)             | C.CarbonBamH1              | 86.48  | 435.1849 | 1303.541 | -0.0004   | -0.3  | 5.81 | 10765.6  | 11.44 | HUMAN | EPR9F8  | Neutral alpha-glycosidase                                       |
| 22236 | dirMS_041712_NAR_120mM_minus.8608.8608.3   | 3 | 4.7  | 1.256E+05 51335      | (R)JAGDLE(R)A/G/D/L/D L E D S P K/P/P(K)               | p.Phosphatase 5            | 101.53 | 502.5853 | 1425.77  | 79.9177   | 3.6   | 6.17 | 23020.5  | 4.53  | HUMAN | AKR60G  | Hepatoma-derived growth factor                                  |
| 22237 | dirMS_041712_NAR_20mM_minus.10712.10712.3  | 3 | 4.7  | 0.292E+05 M494m      | (R)GIAMH(R)G A/H/H/N S I T C A A M/P/K(L)              | C.CarbonBamH1              | 155.45 | 502.2275 | 1488.676 | 15.9923   | 3.7   | 8.76 | 114220.9 | 9.14  | HUMAN | Q43303  | Centriolar coiled-coil protein of 110 kDa                       |
| 22238 | dirMS_041712_NAR_20mM_minus.14221.14221.3  | 3 | 4.7  | 0.2307E+04           | (R)SLVFEA(R)S V E E I A V A G V V G D E I Q I E(K)     |                            | 199.53 | 501.2696 | 1084.991 | -0.0056   | -3.5  | 4.08 | 269254   | 5.12  | HUMAN | EP9904  | Yeast RNA polymerase III                                        |
| 22239 | dirMS_041712_NAR_40mM_minus.9827.9827.2    | 2 | 4.7  | 0.152E+05            | (R)KLELEK(R)S L/E/G/G T Q D L/R(L)                     |                            | 147.82 | 643.8318 | 1286.659 | -0.0023   | -1.8  | 4.14 | 266161   | 5.68  | HUMAN | EPR9UO  | Epiplakin                                                       |
| 22240 | dirMS_041712_NAR_40mM_minus.11396.11396.3  | 3 | 4.7  | 1.972E+04 5133       | (R)SLGKG(R)S L/G/G A P/P G V P F E G S I R(I)          | C.CarbonBamH1              | 149.57 | 637.0132 | 1705.923 | 2013.1019 | 31.5  | 8.46 | 23993.4  | 6.77  | HUMAN | FS17H0  | Glutathione S-transferase omega-1                               |
| 22241 | dirMS_041712_NAR_40mM_minus.12032.12032.3  | 3 | 4.7  | 1.125E+05            | (R)KLDVSN(K)D/VU/S N/V A T D T E R/L E L K(V)          |                            | 153.87 | 601.6499 | 1802.949 | -0.0143   | -7.9  | 4.32 | 288852.1 | 5.33  | HUMAN | EPRFMS  | Ulipolysaccharide-responsive and beige-like anchor protein      |
| 22242 | dirMS_041712_NAR_40mM_minus.2807.2807.3    | 3 | 4.7  | 1.195E+03 388b       | (K)RSLGQ(R)K L V G L N A/D V A E E L Y(K)              | n.v.kyotex(genebank 5)     | 130.68 | 656.6771 | 1746.964 | 2033.0531 | -13.5 | 4.68 | 24693.4  | 4.72  | HUMAN | KT61E8  | Methy-CpG binding domain protein 3, isoform CRA_b               |
| 22243 | dirMS_041712_NAR_40mM_minus.3944.3944.3    | 3 | 4.7  | 0.639E+03 M44m       | (R)KSGTGA(K)T G I G V A V A G V V G D E I Q I E(K)     |                            | 199.53 | 501.2696 | 1084.991 | -0.0056   | -3.5  | 4.08 | 269254   | 5.12  | HUMAN | EP9904  | Yeast RNA polymerase III                                        |
| 22244 | dirMS_041712_NAR_60mM_minus.14564.14564.3  | 3 | 4.7  | 1.218E+05 K791k      | (R)IKLQPE(R)K I/P G E K/A/L F(K)                       | k.kitseqin-6               | 141.12 | 482.2774 | 1330.784 | 114.0335  | -6.5  | 9.7  | 147219.5 | 9.31  | HUMAN | QBHM5-4 | isoform 4 of Lysine-specific demethylase 2B                     |
| 22245 | dirMS_041712_NAR_60mM_minus.8943.8943.2    | 2 | 4.7  | 0.967E+05            | (K)IQEYDE(K)Q E Y D I V A G V V G D E I Q I E(K)       |                            | 110.83 | 578.8539 | 1516.703 | -0.0021   | -1.4  | 6.65 | 123097.1 | 5.83  | HUMAN | ASAE30  | POTE ankyrin domain family member 5                             |
| 22246 | dirMS_041712_NAR_120mM_plus.10043.10043.3  | 3 | 4.7  | 0.184E+05            | (K)ITFYAL(K)T F Y Y A I A G V V G D E I Q I E(K)       |                            | 105.65 | 411.8849 | 1239.662 | -0.0218   | -17.6 | 6    | 89971.2  | 6.26  | HUMAN | ET59J9  | Protein EFR3 homolog B                                          |
| 22247 | dirMS_041712_NAR_120mM_plus.4683.4683.3    | 3 | 4.7  | 0.609E+05            | (R)HSGDQ(R)T H S Q G G V G S G Y K(V)                  |                            | 74.08  | 457.2097 | 1360.613 | -0.0001   | -0.1  | 8.2  | 54213.9  | 7.33  | HUMAN | DA3653  | Phenylalanine-tRNA ligase alpha subunit                         |
| 22248 | dirMS_041712_NAR_20mM_plus.16428.16428.3   | 3 | 4.7  | 2.648E+04 5205z M13m | (K)GPKAAQ(K)G P A K A R G S/L/H K(V)                   | n.v.kyotex(genebank 5)Dm3m | 185.8  | 582.2872 | 1525.79  | 219.0567  | -0.01 | 9.09 | 101858.5 | 5.1   | HUMAN | HTCPD0  | Centrosome-associated protein CEP250 (Fragment)                 |
| 22249 | dirMS_041712_NAR_20mM_plus.17019.17019.2   | 2 | 4.7  | 0.791E+04            | (R)NIIPIHA(K)V N I I/P/P I A(K)                        |                            | 189.17 | 490.8283 | 980.65   | -0.001    | -1    | 8.72 | 51212    | 5.84  | HUMAN | AN6FQ9  | Septin-8                                                        |
| 22250 | dirMS_041712_NAR_20mM_plus.19028.19028.2   | 2 | 4.7  | 0.879E+04            | (R)IEGDV(L)R G D W/L T L/L E S E R(E)                  |                            | 203    | 680.8536 | 1360.696 | 0.0045    | 3.3   | 4    | 7898     | 11.1  | HUMAN | PE2857  | 40S ribosomal protein S28                                       |
| 22251 | dirMS_041712_NAR_20mM_plus.7538.7538.2     | 2 | 4.7  | 0.235E+05            | (R)EYFPTV(K)T L/T/P/P Q L(V)                           |                            | 121.68 | 443.2734 | 885.54   | -0.0009   | -1    | 8.72 | 2170.5   | 7.02  | HUMAN | P308B6  | Phosphotyrosylmethanolamine-binding protein 1                   |
| 22252 | dirMS_041712_NAR_30mM_plus2.21685.21685.2  | 2 | 4.7  | 0.165E+05            | (R)KIMNAD(K)I N I D V A V S G S G V R(I)               |                            | 164.83 | 566.2872 | 1313.575 | -0.0082   | -7.2  | 5.88 | 108208.7 | 5.5   | HUMAN | BRECE7  | ZNF507 protein                                                  |
| 22253 | dirMS_041712_NAR_30mM_plus2.21749.21749.2  | 2 | 4.7  | 0.176E+04            | (K)NGFLFD(K)G T V F/L U D I G F P R(I)                 |                            | 169.18 | 568.3022 | 1135.59  | 0.0077    | 6.7   | 5.84 | 21283.1  | 6.45  | HUMAN | F8V0U4  | Adenylate kinase 2, mitochondrial                               |
| 22254 | dirMS_041712_NAR_30mM_plus2.22284.22284.3  | 3 | 4.7  | 0.296E+05            | (K)NSVYF(K)K S V S Y V E/V V P N N V K(V)              |                            | 171.18 | 566.2872 | 1696.833 | 0.0101    | 8.3   | 6    | 42831.5  | 4.86  | HUMAN | AKR854  | isoform CRA_f                                                   |
| 22255 | dirMS_041712_NAR_40mM_plus.5511.5511.2     | 2 | 4.7  | 0.150E+05            | (R)GINSGAR(R)S N I N G A F Y K(V)                      |                            | 89.97  | 422.2033 | 84.399   | -0.0022   | -0.3  | 8.59 | 66105.7  | 7.33  | HUMAN | AMNQB8  | Fraxig X mental retardation protein 1                           |
| 22256 | dirMS_041712_NAR_40mM_plus2.2008.2008.3    | 3 | 4.7  | 1.787E+04            | (R)KVTPE(K)T M Q T V E G V G S G Y K(V)                |                            | 115.57 | 552.9296 | 1656.775 | -0.0009   | -0.5  | 5.32 | 33488.6  | 6.26  | HUMAN | C12G1   | Eukaryotic translation initiation factor 3 subunit B (Fragment) |
| 22257 | dirMS_041712_NAR_60mM_plus.17156.17156.3   | 3 | 4.7  | 0.204E+05            | (R)HHPG(R)K I T H L P P A G E E/Q A E A L K(A)         |                            | 147.35 | 513.9442 | 1539.817 | 0.0015    | -1    | 5.37 | 23314.2  | 9.39  | HUMAN | P30044  | Peroxisome- $\alpha$ , mitochondrial                            |
| 22258 | dirMS_041712_NAR_60mM_plus.5636.5636.3     | 3 | 4.7  | 0.768E+04            | (R)HAEJA(R)T A E H E A A Q E D I Q Q S F(K)            |                            | 87.8   | 519.2487 | 1555.735 | -0.0031   | -2    | 4.65 | 156557.7 | 5.52  | HUMAN | GB6UQ2  | Kinectin                                                        |
| 22259 | dirMS_041712_NAR_120mM_minus.17120.17120.4 | 4 | 4.69 | 1.517E+05            | (K)YVYTHD(K)Y Y V T D/V A P G A R D F N(K)             |                            | 147.97 | 477.7556 | 1908.001 | -0.0004   | -0.4  | 6.75 | 12137.8  | 9.33  | HUMAN | APR8W0  | Elongation factor $\alpha$ -1                                   |
| 22260 | dirMS_041712_NAR_120mM_minus.5661.5661.3   | 3 | 4.69 | 0.217E+05            | (R)HAEJA(R)T A E H E A A Q E D I Q Q S F(K)            |                            | 87.8   | 519.2487 | 1555.735 | -0.0031   | -2    | 4.65 | 156557.7 | 5.52  | HUMAN | GB6UQ2  | Kinectin                                                        |
| 22261 | dirMS_041712_NAR_120mM_minus.6598.6598.3   | 3 | 4.69 | 1.621E+05            | (K)QIMNDE(K)Q M N E G A H R D F N(K)                   |                            | 90.38  | 471.8802 | 1413.632 | -0.0058   | -3.8  | 4.56 | 976.1    | 5.52  | HUMAN | EPR538  | Protein NEDD8-MOP1                                              |
| 22262 | dirMS_041712_NAR_120mM_minus.8848.8848.3   | 3 | 4.69 | 0.290E+05 M148m      | (R)IAHSM(R)H S I V S m I V G I V N P Q L(K)            | m.Distal methionine        | 103.02 | 461.9056 | 1367.71  | 15.9923   | -1.9  | 8.8  | 41827.5  | 7     | HUMAN | BTZ7A0  | Phosphoglycerate kinase                                         |
| 22263 | dirMS_041712_NAR_20mM_minus.13559.13559.2  | 2 | 4.69 | 0.133E+05            | (K)QIYAL(K)R D I Y V A L D D Q K(H)                    |                            | 168.48 | 583.3076 | 1165.61  | -0.002    | -1.7  | 4.21 | 266161   | 5.68  | HUMAN | EPR9UO  | Epiplakin                                                       |
| 22264 | dirMS_041712_NAR_20mM_minus.6938.6938.3    | 3 | 4.69 | 1.205E+05 M139m      | (R)HAEJA(R)T A E H E A A Q E D I Q Q S F(K)            |                            | 87.8   | 519.2487 | 1555.735 | -0.0031   | -2    | 4.65 | 156557.7 | 5.52  | HUMAN | GB6UQ2  | Kinectin                                                        |
| 22265 | dirMS_041712_NAR_20mM_plus.12242.12242.2   | 2 | 4.69 | 0.154E+05            | (R)KILGVL(K)K L Q Q V D V R(I)                         | m.Distal methionine        | 157.65 | 483.2863 | 985.566  | -0.0023   | -2.4  | 4.37 | 61018.6  | 9.44  | HUMAN | B4D1W8  | Probable ATP-dependent RNA helicase DDX5                        |
| 22266 | dirMS_041712_NAR_20mM_plus.18051.18051.2   | 2 | 4.69 | 0.131E+05 M139m      | (K)YVYTYG(K)V Y T Y G m A N L T G P K(R)               | m.Distal methionine        | 196.32 | 740.3997 | 1463.793 | 15.9995   | 3.1   | 8.56 | 28454.5  | 6.24  | HUMAN | B0AZP7  | Synaptic vesicle membrane protein VAT-1 (Fragment)              |
| 22267 | dirMS_041712_NAR_20mM_plus.18948.18948.2   | 2 | 4.69 | 0.213E+04            | (K)ILVYEA(K)R I H S I L I A E I L E Y A(K)             |                            | 201.67 | 656.3664 | 1311.719 | 0.006     | 4.6   | 4.53 | 32335.6  | 9.19  | HUMAN | B4D2W6  | Regulator of microtubule dynamics protein 1                     |
| 22268 | dirMS_041712_NAR_30mM_plus2.18020.18020.3  | 3 | 4.69 | 0.141E+05            | (R)HVPALLA(R)V N P L V E L N U I R(S)                  |                            | 147.58 | 450.9019 | 1209.695 | -0.0039   | -3.2  | 5.97 | 20026.6  | 4.67  | HUMAN | EPR9K5  | Ribonuclease inhibitor (Fragment)                               |
| 22269 | dirMS_041712_NAR_30mM_plus2.2924.2924.2    | 2 | 4.69 | 0.684E+05            | (R)KILGVL(K)K L Q Q V D V R(I)                         | C.CarbonBamH1              | 101.18 | 514.7643 | 1028.519 | 0.002     | 1.9   | 5.5  | 50199.4  | 4.75  | HUMAN | AN0N2Z  | Tubulin beta-2 chain-like protein LOC260334                     |
| 22270 | dirMS_041712_NAR_30mM_plus2.3397.3397.2    | 2 | 4.69 | 0.322E+05            | (R)ILAVNDV(R)I A V A N D V A S R(A)                    |                            | 102.88 | 541.2545 | 901.51   | -0.0084   | -9.4  | 5.84 | 266161   | 5.68  | HUMAN | EPR9UO  | Epiplakin                                                       |
| 22271 | dirMS_041712_NAR_40mM_plus2.16254.16254.3  | 3 | 4.69 | 1.374E+05            | (R)EIPGTS(R)R P E G T S N L L V P D S I A R S T Q K(R) |                            | 163.12 | 662.6815 | 1986.014 | 0.0161    | 8.1   | 4.56 | 84112.2  | 6.88  | HUMAN | Q40724  | Transducin-like enhancer protein 1                              |
| 22272 | dirMS_041712_NAR_40mM_plus2.5837.5837.2    | 2 | 4.69 | 0.168E+05            | (R)KSIOAE(R)S K Q A E V I E(F)                         |                            | 92.1   | 484.2219 | 967.437  | -0.0002   | -0.2  | 4.25 | 71231.7  | 9.22  | HUMAN | ET6R3   | Threonine-tRNA ligase, cytoplasmic                              |
| 22273 | dirMS_041712_NAR_40mM_plus2.5591.5591.2    | 2 | 4.69 | 0.240E+05            | (R)HAEJA(R)T A E H E A A Q E D I Q Q S F(K)            |                            | 87.8   | 519.2487 | 1555.735 | -0.0031   | -2    | 4.65 | 156557.7 | 5.52  | HUMAN | GB6UQ2  | Kinectin                                                        |
| 22274 | dirMS_041712_NAR_50mM_plus2.13421.13421.3  | 3 | 4.69 | 1.841E+05            | (R)HVPVH(R)V L V V V H D F G E G L A K(I)              |                            | 139.35 | 461.9229 | 1383.763 | -0.0089   | -6.5  | 5.32 | 19179.1  | 6.91  | HUMAN | F8V900  | T-complex protein 1 subunit beta (Fragment)                     |
| 22275 | dirMS_041712_NAR_50mM_plus2.17999.17999.3  | 3 | 4.69 | 1.283E+05            | (K)KJAGIGL(K)K I G I Q P F C L K(V)                    | C.CarbonBamH1              | 162.33 | 515.9649 | 1545.882 | -0.0002   | -1.3  | 10   | 42755    | 7.81  | HUMAN | BTZ7A0  | T-complex protein 1 subunit delta                               |
| 22276 | dirMS_041712_NAR_50mM_plus2.22450.22450.3  | 3 | 4.69 | 1.126E+06            | (R)IGVWLA(R)V M I A V D V A I E A L K(K)               |                            | 195.7  | 519.6393 | 1556.908 | -0.0047   | -3    | 6.07 | 25225.7  | 9.52  | HUMAN | ET9H4   | 60 kDa heat shock protein, mitochondrial (Fragment)             |
| 22277 | dirMS_041712_NAR_50mM_plus2.5387.5387.3    | 3 | 4.69 | 0.932E+04 M453m      | (K)HVPVH(R)S M I N G A F Y K(V)                        | C.CarbonBamH1              | 88.92  | 483.1881 | 1317.527 | 1200.225  | -10.6 | 4.21 | 73800.1  | 9.14  | HUMAN | EPR919  | Nucleosome-remodelling complex subunit BPTF (Fragment)          |
| 22278 | dirMS_041712_NAR_50mM_plus2.9970.9970.3    | 3 | 4.69 | 1.246E+06            | (R)KJATAV(K)K I A V C D V G A E A V N(L)               | C.CarbonBamH1              | 120.07 | 445.5822 | 1334.731 | 0.0006    | 0.5   | 5.11 | 12522.2  | 5.82  | HUMAN | AN1W5   | Peroxisome- $\alpha$ , isoform CRA_a                            |
| 22279 | dirMS_041712_NAR_120mM_minus.5084.5084.3   | 3 | 4.68 | 1.103E+06 M194m      | (R)CREM(R)R R E V N Y D E Q L R(L)                     | C.CarbonBamH1              | 80.33  | 418.1844 | 1236.546 | 15.9927   | -1.8  | 4.68 | 33450.2  | 4.73  | HUMAN | IKN67   | Tropomyosin alpha-3 chain                                       |
| 22280 | dirMS_041712_NAR_20mM_minus.14583.14583.3  | 3 | 4.68 | 0.176E+04            | (R)KILVYEA(K)R I H S I L I A E I L E Y A(K)            |                            | 199.98 | 529.6163 | 1586.838 | 0.0041    | -2.6  | 4.03 | 24286.7  | 4.89  | HUMAN | G3V4N7  | Creatine kinase B-type (Fragment)                               |
| 22281 | dirMS_041712_NAR_20mM_plus.16684.16684.2   | 2 | 4.68 | 0.162E+05            | (K)NLSVAF(R)N P S V A A F F Y K(V)                     | C.CarbonBamH1              | 144.27 | 620.3013 | 1239.594 | 0.0014    | -1.1  | 9.75 | 18       |       |       |         |                                                                 |

|       |                                            |   |      |           |         |                                                      |                                                                  |        |          |          |          |       |      |          |       |       |        |                                                                          |
|-------|--------------------------------------------|---|------|-----------|---------|------------------------------------------------------|------------------------------------------------------------------|--------|----------|----------|----------|-------|------|----------|-------|-------|--------|--------------------------------------------------------------------------|
| 22341 | dirMS_041712_NAR_120mM_minus.10531.10531.2 | 2 | 4.65 | 0.267E+05 | M103m   | (R)ILmDfR(R)l/m m D/F/D/G/K(N)                       | mDnaed methionine                                                | 112.05 | 494.7161 | 956.422  | 32.0043  | 13.7  | 4.21 | 64554.4  | 7.74  | HUMAN | ADQV96 | RNA-binding protein 47                                                   |
| 22342 | dirMS_041712_NAR_120mM_minus.14788.14788.4 | 4 | 4.65 | 0.144E+04 | T29K    | (R)ITANf(R) T/E A T L G H E/E/K/P1 A R(C)            | l-N-acetylglucosamine (N)                                        | 114.36 | 493.2474 | 1766.901 | 203.0646 | -7.5  | 5.5  | 5441.8   | 4.68  | HUMAN | EPB9U3 | Ribosomal protein S6 kinase alpha-4                                      |
| 22343 | dirMS_041712_NAR_120mM_minus.5815.5815.3   | 3 | 4.65 | 0.417E+03 | S106B5  | (R)HWTSf(R) F/T S G V Q V A/V/K(Q)                   | l-phosphatidylinositol 4,5-bisphosphate phosphodiesterase beta-3 | 95.33  | 477.8051 | 1504.785 | -0.0013  | -6.3  | 479  | 8491.4   | 8.32  | HUMAN | PO4264 | Keratin, type II cytoskeletal 1                                          |
| 22344 | dirMS_041712_NAR_120mM_minus.7552.7552.3   | 3 | 4.65 | 1.218E+05 |         | (K)ISKAfE(K) A E E A/E/S/L/V/G/S R(A)                |                                                                  | 99.15  | 510.9036 | 1350.697 | -0.0003  | -0.2  | 5.32 | 5782.5   | 6.01  | HUMAN | P78371 | T-complex protein 1 subunit beta                                         |
| 22345 | dirMS_041712_NAR_120mM_minus.8289.8289.3   | 3 | 4.65 | 0.325E+05 | M35m    | (K)NDIANf(K) D I(A)I/E L/N E(K)R                     | mDnaed methionine                                                | 198.11 | 588.7948 | 1160.598 | 15.9843  | -9    | 4.37 | 28354    | 7.11  | HUMAN | BD40X8 | 26S proteasome non-ATPase regulatory subunit 7                           |
| 22346 | dirMS_041712_NAR_120mM_minus.15233.15233.2 | 2 | 4.65 | 0.736E+05 | M429m   | (K)NSQPA(K) S/L/V/Q/V A/V/K(Q)                       | mDnaed methionine                                                | 115.75 | 585.2256 | 1157.548 | 15.9597  | -1    | 6.75 | 26616.0  | 6.17  | HUMAN | EP9178 | Eglin-like protein                                                       |
| 22348 | dirMS_041712_NAR_30mM_minus.10689.10689.2  | 2 | 4.65 | 0.312E+05 |         | (K)NLNGDf(K)U/L/N/L/G/D/G/F(K)E                      | mDnaed methionine                                                | 146.4  | 488.7803 | 976.546  | -0.0071  | -7.3  | 5.84 | 6447     | 4.24  | HUMAN | HTCD05 | Protein YP94 (Fragment)                                                  |
| 22349 | dirMS_041712_NAR_30mM_minus.17969.17969.2  | 2 | 4.65 | 0.170E+05 |         | (R)YVANf(R) F Y A/V N/F P Y K(Q)                     |                                                                  | 151.43 | 557.7997 | 1114.593 | -0.001   | -0.9  | 8.5  | 23312.3  | 5.53  | HUMAN | BD4FH3 | Inorganic pyrophosphatase 2, mitochondrial                               |
| 22350 | dirMS_041712_NAR_50mM_minus.13343.13343.3  | 3 | 4.65 | 1.192E+05 | M17m    | (K)IDSEf(K)K G A/E/E/m E T/V/P D V M R(A)            | mDnaed methionine                                                | 144.83 | 616.6435 | 1831.904 | 10.0119  | 9.2   | 4.41 | 18800.7  | 7.92  | HUMAN | FTLW00 | Protein Di-1                                                             |
| 22351 | dirMS_041712_NAR_50mM_minus.13454.13454.3  | 3 | 4.65 | 1.137E+05 |         | (K)IDSEf(K)K D/V/S R/L E G/V/T/S A E I G T(H)        |                                                                  | 143.62 | 604.3145 | 1810.918 | 10.0119  | 6     | 4.68 | 54214.9  | 5.66  | HUMAN | CSB183 | Caldesmon                                                                |
| 22352 | dirMS_041712_NAR_50mM_minus.5998.5998.1    | 1 | 4.65 | 1.240E+04 |         | (K)IDVSSf(K)E V/V L/V Q/V A/V/K(Q)                   |                                                                  | 99.4   | 502.266  | 1504.785 | -0.0013  | -6.3  | 479  | 8491.4   | 6.23  | HUMAN | Y143   | 14-3-3 protein zeta/delta (Fragment)                                     |
| 22353 | dirMS_041712_NAR_50mM_minus.9436.9436.3    | 3 | 4.65 | 1.188E+04 | M17m T1 | (K)LMVf(M) K/L m V/V/V/L Q/V A/E(L)                  | mDnaed methionine-DNA                                            | 122.27 | 530.5989 | 1354.686 | 235.0964 | 17.1  | 6    | 16127.5  | 8.87  | HUMAN | HOYR18 | ATP-binding cassette sub-family A member 10 (Fragment)                   |
| 22354 | dirMS_041712_NAR_60mM_minus.12155.12155.3  | 3 | 4.65 | 1.377E+05 |         | (K)AANGf(K)A I A/G K A E L/E/L/I G A(R)              |                                                                  | 127.53 | 476.5974 | 1427.885 | -0.0076  | -5.3  | 4.79 | 533778   | 5.74  | HUMAN | Q51149 | Plectin                                                                  |
| 22355 | dirMS_041712_NAR_60mM_minus.18661.18663.3  | 3 | 4.65 | 1.117E+05 |         | (K)ILDLSf(K)I/V/D/L/S P I K G R(A)                   |                                                                  | 166    | 518.6442 | 1551.926 | -0.0081  | -5.2  | 6.07 | 51260.6  | 5.39  | HUMAN | PE1978 | Heterogeneous nuclear ribonucleoprotein K                                |
| 22356 | dirMS_041712_NAR_60mM_minus.19535.19535.3  | 3 | 4.65 | 1.958E+05 |         | (R)IVSGLf(R) V/S G V/L Q/V G N I/V F(K)E             |                                                                  | 175.05 | 575.4994 | 1040.018 | -0.0018  | -1.1  | 10   | 22783.5  | 5.5   | HUMAN | MY91-9 | Mysin-9                                                                  |
| 22357 | dirMS_041712_NAR_60mM_minus.8367.8367.3    | 3 | 4.65 | 1.155E+05 |         | (R)ITPVPf(R) P I P P G V T F S/A/K N(K)G             |                                                                  | 107.03 | 454.5795 | 1361.706 | 0.018    | 13.2  | 8.26 | 78036.1  | 4.83  | HUMAN | Q726P3 | His-related protein Rab-44                                               |
| 22358 | dirMS_041712_NAR_20mM_plus.11288.11288.3   | 3 | 4.65 | 0.110E+05 |         | (R)IGCTf(R)G C/T I G G G D/T/A/T C C A(K)W           | C-Cardanin methionylation                                        | 150.23 | 585.5999 | 1754.787 | -0.0019  | -1.1  | 5.84 | 41827.5  | 7     | HUMAN | B727A9 | Phosphoglycerate kinase                                                  |
| 22359 | dirMS_041712_NAR_20mM_plus.14628.14628.3   | 3 | 4.65 | 0.130E+05 |         | (R)IQEAGf(R)I Q E A I G/E A/E/E L/Q R(L)             |                                                                  | 172.17 | 519.6131 | 1556.828 | -0.0031  | -2    | 4.25 | 533778   | 5.74  | HUMAN | Q15149 | Plectin                                                                  |
| 22360 | dirMS_041712_NAR_20mM_plus.6939.6939.2     | 2 | 4.65 | 0.844E+04 | M29m    | (K)IVNf(R)K V/V C/T/E A/E R(V)G                      |                                                                  | 114.35 | 596.3035 | 1175.609 | 15.9908  | -3.4  | 4.53 | 14493.5  | 5.23  | HUMAN | CS9163 | Sarinty/threonine protein phosphatase (Fragment)                         |
| 22361 | dirMS_041712_NAR_30mM_plus.20773.20773.2   | 2 | 4.65 | 0.127E+05 |         | (K)IVNf(R)K V/S V/T/S I F G K(N)                     |                                                                  | 162.85 | 518.799  | 1036.604 | -0.013   | -12.5 | 8.47 | 132002.3 | 5.82  | HUMAN | IKR824 | Isolectin-B4NA ligase, cytoplasmic                                       |
| 22362 | dirMS_041712_NAR_30mM_plus.4862.4862.2     | 2 | 4.65 | 1.234E+05 |         | (R)ITKGGf(R) T/N T/G G D G A/P(A)G/D A(L)            |                                                                  | 77     | 637.286  | 1273.565 | -0.0008  | -0.6  | 4.03 | 13798.9  | 10.17 | HUMAN | PE2851 | 40S ribosomal protein S25                                                |
| 22363 | dirMS_041712_NAR_30mM_plus.9478.9478.2     | 2 | 4.65 | 0.250E+05 |         | (R)ILTYNf(R) L/T/Y/V N/A R(A)                        |                                                                  | 103.73 | 461.2586 | 921.515  | -0.0053  | -5.8  | 8.75 | 36309.7  | 5.86  | HUMAN | BD4D01 | Short/branched chain-specific acyl-CoA dehydrogenase, mitochondrial      |
| 22364 | dirMS_041712_NAR_30mM_plus.15356.15356.3   | 3 | 4.65 | 0.142E+04 |         | (K)ILTEVPf(K)I/V/T P/E V/P L T V H P/E V(S)K         |                                                                  | 146.12 | 625.3454 | 1847.027 | -0.0053  | -2.8  | 4.75 | 81726.4  | 6.71  | HUMAN | Q9H037 | Pim1                                                                     |
| 22365 | dirMS_041712_NAR_40mM_plus.6460.6460.2     | 2 | 4.65 | 0.135E+05 |         | (K)ISLSEf(K)K S/L/S/E I/S V/S R(L)                   |                                                                  | 96.88  | 483.2358 | 905.469  | -0.0048  | -4.8  | 5.72 | 12063.8  | 6.92  | HUMAN | ES1891 | 60S ribosomal protein L30 (Fragment)                                     |
| 22366 | dirMS_041712_NAR_40mM_plus.9711.9711.3     | 3 | 4.65 | 0.232E+05 |         | (R)AAEDPf(R)A A/E D/P/A A/P P R P L A G G R(L)       |                                                                  | 121.05 | 572.6438 | 1715.919 | -0.0019  | -1.1  | 6.12 | 73966.7  | 10.21 | HUMAN | IK3WK5 | Alpha-L-iduronidase                                                      |
| 22367 | dirMS_041712_NAR_50mM_plus.9726.9726.3     | 3 | 4.65 | 0.515E+05 |         | (K)IGVADGf(K)G A/V/D/G G L S/P H Q(K)                |                                                                  | 117.32 | 446.9057 | 1338.701 | 0.0013   | 1     | 6.74 | 34590.2  | 9.84  | HUMAN | PA6777 | 60S ribosomal protein L5                                                 |
| 22368 | dirMS_041712_NAR_50mM_plus.9877.9877.3     | 3 | 4.65 | 0.107E+05 | M180m   | (R)IVVf(R)K V/V I/V/L/m S D L H I G C H(K)           | C-Cardanin methionylation-mDnaed                                 | 119.17 | 583.2837 | 1371.804 | 15.9961  | 9.7   | 5.32 | 37681.5  | 5.93  | HUMAN | DR6R62 | Phosphoribosylaminimidazole carboxylase                                  |
| 22369 | dirMS_041712_NAR_50mM_plus.17390.17390.3   | 3 | 4.65 | 1.344E+05 |         | (R)IVVf(R)K V/V I/V/L/m S D L H I G C H(K)           |                                                                  | 147.37 | 482.4167 | 1466.912 | -0.0012  | -0.7  | 6.12 | 48014.2  | 6.23  | HUMAN | Q9H047 | Insulin gene enhancer protein beta-2 (Fragment)                          |
| 22370 | dirMS_041712_NAR_60mM_plus.19085.19085.3   | 3 | 4.65 | 0.104E+05 |         | (K)ISLKKPf(K)S L/K P/L A C L D L(K)                  | C-Cardanin methionylation                                        | 123.53 | 454.2724 | 1360.802 | 0.0005   | 0.4   | 10   | 22702.2  | 6.28  | HUMAN | Q14008 | Cytoskeleton-associated protein 5                                        |
| 22371 | dirMS_041712_NAR_60mM_plus.8968.8968.3     | 3 | 4.65 | 1.509E+05 | M194m   | (K)KJAVSf(R)K I/V/S V K m m V L C A/K(W)             | mDnaed methionine                                                | 104.88 | 470.9228 | 1378.762 | 31.9911  | 0.9   | 10   | 218583   | 5.58  | HUMAN | FS2WV5 | Chromodomain-helicase-DNA-binding protein 4                              |
| 22372 | dirMS_041712_NAR_120mM_minus.11268.11268.3 | 3 | 4.64 | 0.139E+05 |         | (R)IGFLPp(R) F/C L/P/R H C S(R)G                     | C-Cardanin methionylation                                        | 114.32 | 410.8255 | 1230.551 | 0.0088   | 7.1   | 9.75 | 14391.8  | 4.59  | HUMAN | GS3V61 | Creatine kinase B-type (Fragment)                                        |
| 22373 | dirMS_041712_NAR_120mM_minus.15063.15063.3 | 3 | 4.64 | 0.545E+05 |         | (K)ISFESf(K)K P/T S L/S/S A/G G G K(L)               |                                                                  | 135.58 | 548.9469 | 1370.275 | -0.0015  | -0.9  | 5.96 | 3070.5   | 6.93  | HUMAN | PK3086 | Phosphotyrosine phosphatase (Fragment)                                   |
| 22374 | dirMS_041712_NAR_20mM_minus.9753.9753.2    | 2 | 4.64 | 0.836E+05 | M23m    | (K)VEVDQf(K)E V/E/Q/V/L/V Q/V K(T)                   |                                                                  | 124.27 | 731.843  | 1446.689 | 15.9894  | 3.8   | 4.14 | 40059.4  | 4.83  | HUMAN | ETWV11 | Tubulin beta chain                                                       |
| 22375 | dirMS_041712_NAR_20mM_minus.9646.9646.2    | 2 | 4.64 | 0.591E+05 |         | (K)DVNAAf(K)D V/N A/V A I/V A T(K)                   |                                                                  | 146.73 | 508.2919 | 1015.578 | -0.0017  | -1.7  | 5.84 | 58642    | 4.95  | HUMAN | FHS5D3 | Tubulin alpha-1C chain                                                   |
| 22376 | dirMS_041712_NAR_30mM_minus.19824.19824.2  | 2 | 4.64 | 0.744E+05 |         | (R)IEMDf(R) M E/E L/V N S I/V A(L)                   |                                                                  | 165.08 | 487.804  | 1134.586 | 0.0144   | 12.7  | 4.53 | 60014.5  | 4.62  | HUMAN | Q8N029 | V-set and immunoglobulin domain-containing protein 10                    |
| 22377 | dirMS_041712_NAR_30mM_minus.5680.5680.2    | 2 | 4.64 | 0.144E+05 |         | (R)IQDQDf(K)P D I/D G D S E V G S V F(Y)             |                                                                  | 92.85  | 489.1898 | 1465.575 | -0.0205  | -14   | 3.38 | 29531.3  | 10.25 | HUMAN | Q9H047 | Occludin/ELL domain-containing protein 1                                 |
| 22378 | dirMS_041712_NAR_60mM_minus.1228.1228.3    | 3 | 4.64 | 1.217E+05 |         | (K)ISGLKf(K)S G/V/L/G Q/V A/V/K(Q)                   |                                                                  | 141.73 | 473.258  | 1417.78  | -0.0021  | -14.3 | 8.31 | 67933    | 6.08  | HUMAN | PT2638 | Moesin                                                                   |
| 22379 | dirMS_041712_NAR_60mM_minus.18834.18834.3  | 3 | 4.64 | 0.250E+05 |         | (K)IHLNLI(K)H H D N I/V/D L E N T(V)K(A)             |                                                                  | 162.78 | 575.3117 | 1723.922 | -0.0019  | -1.1  | 4.54 | 88264.6  | 5.09  | HUMAN | CSJ811 | Cytosin-A (Fragment)                                                     |
| 22380 | dirMS_041712_NAR_60mM_minus.19334.19334.3  | 3 | 4.64 | 1.156E+04 |         | (K)AJNNAf(K)K A K I N E A/V/E/C/L L S L(A)           | C-Cardanin methionylation                                        | 172.08 | 529.9633 | 1587.878 | -0.0021  | -1.3  | 6.18 | 172185.3 | 7.06  | HUMAN | PO7814 | Bifunctional glutamate/proline-19NA ligase                               |
| 22381 | dirMS_041712_NAR_60mM_minus.7800.7800.3    | 3 | 4.64 | 1.206E+04 |         | (R)IVDQVf(K)I/V/D G K V/S T E N D T(K)               |                                                                  | 100.12 | 502.2642 | 1504.785 | -0.0077  | -4.8  | 4.56 | 48057    | 5.34  | HUMAN | PO5783 | Keratin, type I cytoskeletal L8                                          |
| 22382 | dirMS_041712_NAR_60mM_minus.7583.7583.3    | 3 | 4.64 | 0.450E+05 |         | (K)ISVQVf(K)K V/V L/V Q/V A/V/K(Q)                   |                                                                  | 101.23 | 495.2442 | 1361.706 | -0.0012  | -1.1  | 6.12 | 3761.7   | 6.12  | HUMAN | CS1813 | CAMP-dependent protein kinase type I-alpha regulatory subunit (Fragment) |
| 22383 | dirMS_041712_NAR_120mM_plus.5242.5242.3    | 3 | 4.64 | 0.551E+05 |         | (K)ISPYQVf(K)S P Q I/Y C/V S T A(K)                  |                                                                  | 102.12 | 429.8855 | 1287.626 | -0.0187  | -14.5 | 8.49 | 39056    | 6.61  | HUMAN | AKP7V5 | Selenium selenite-binding protein 1 (Fragment)                           |
| 22384 | dirMS_041712_NAR_20mM_plus.18060.18060.3   | 3 | 4.64 | 0.171E+05 |         | (R)ISVLGAf(R)I S/V L G A/V/T/S Q/Q R(L)              |                                                                  | 136.43 | 457.9354 | 1371.795 | -0.0038  | -2.8  | 9.75 | 47760.5  | 5.39  | HUMAN | B727P8 | Eukaryotic leucine carboxylate factor subunit 1                          |
| 22385 | dirMS_041712_NAR_20mM_plus.9185.9185.2     | 2 | 4.64 | 0.702E+04 |         | (K)IATAVDf(K)I A/T A/V/D V G A Q(E)                  |                                                                  | 194.42 | 489.2783 | 978.525  | 0.0021   | 2.1   | 5.88 | 15522.2  | 5.82  | HUMAN | ABN1W5 | Peroxisome oxidin 2, isoform CRA_a                                       |
| 22386 | dirMS_041712_NAR_30mM_plus.20203.20203.2   | 2 | 4.64 | 0.137E+05 |         | (R)IMDMSf(R)I M/D R O N S T/P S M Y M A R(K)         |                                                                  | 159.15 | 468.8241 | 1336.639 | -0.0021  | -1.6  | 4.37 | 63018.6  | 9.44  | HUMAN | BD4LW8 | Protein-ATP-dependent RNA helicase PDS                                   |
| 22387 | dirMS_041712_NAR_30mM_plus.4260.4260.2     | 2 | 4.64 | 0.477E+05 | M55m    | (R)HJGANNf(R)G A/V M/N L E R(M)                      |                                                                  | 70.22  | 460.7158 | 904.431  | 15.9938  | -12   | 7.55 | 77995.7  | 9.09  | HUMAN | PS2272 | Heterogeneous nuclear ribonucleoprotein C                                |
| 22388 | dirMS_041712_NAR_40mM_plus.7956.7956.2     | 2 | 4.64 | 0.362E+03 |         | (R)ILFEQNf(R)I/F E/Q V N/R S(L)                      |                                                                  | 106.87 | 517.2733 | 1033.543 | -0.0032  | -3.1  | 6    | 21184.9  | 7.82  | HUMAN | PE1081 | NEDD8-conjugating enzyme Ubc12                                           |
| 22389 | dirMS_041712_NAR_40mM_plus.9206.9206.3     | 3 | 4.64 | 0.725E+03 | M15m    | (R)HJGANNf(R) V m/L G E I/T N/P/A D S K/P G T I R(G) |                                                                  | 117.13 | 601.3077 | 1785.916 | 15.9922  | -1.5  | 6.04 | 15431.7  | 9     | HUMAN | ETL810 | Nucleoside diphosphate kinase A                                          |
| 22390 | dirMS_041712_NAR_50mM_plus.10772.10772.3   | 3 | 4.64 | 1.212E+05 |         | (K)IAGALRf(K)A Q/L A/R D N S T/P S M Y M A R(K)      |                                                                  | 123.72 | 596.6125 | 1787.824 | -0.0008  | -0.4  | 8.63 | 83605    | 4.97  | HUMAN | PK082  |                                                                          |

|       |                                            |   |      |   |                |                                                     |                           |        |          |          |          |      |      |          |       |       |        |                                                                       |
|-------|--------------------------------------------|---|------|---|----------------|-----------------------------------------------------|---------------------------|--------|----------|----------|----------|------|------|----------|-------|-------|--------|-----------------------------------------------------------------------|
| 22450 | dirMS_041712_NAR_50mM_plus2.10737.10737.3  | 3 | 4.61 | 1 | 5.79E-04       | (R)VCEIAR(R)W/C/E E I/A/I/P S K L(K)                | C.Carbon demethylation    | 123.9  | 462.9247 | 1386.766 | -0.0066  | -4.7 | 6.11 | 21927.8  | 9.55  | HUMAN | HDYK46 | 40S ribosomal protein S17 (Fragment)                                  |
| 22451 | dirMS_041712_NAR_50mM_plus2.10814.10814.3  | 3 | 4.61 | 1 | 4.68E-05       | (R)IAETTR(R)IA L R E T I I/P A/E Q D L P T T V K(K) | C.Carbon demethylation    | 125.08 | 562.9377 | 1685.907 | -0.0043  | -4.9 | 4.68 | 26790    | 9.25  | HUMAN | FGS11  | Proteasome subunit alpha type 1                                       |
| 22452 | dirMS_041712_NAR_50mM_plus2.12495.12495.3  | 3 | 4.61 | 1 | 1.56E-05       | (R)EALPSE(K)E A L I/E I/E E V I/Q N(K)E             | C.Carbon demethylation    | 142.3  | 454.8862 | 1302.255 | -0.0054  | -7.2 | 6.79 | 26585.1  | 5.33  | HUMAN | EPH85  | Lipopolysaccharide-responsive and beige-like anchor protein           |
| 22453 | dirMS_041712_NAR_50mM_plus2.6047.6047.3    | 3 | 4.61 | 1 | 4.28E-04       | (R)NSVTR(R)S N N/V/A/Q G D A I/T P A E K(Y)K        | C.Carbon demethylation    | 195.88 | 560.8581 | 1680.855 | -0.0067  | -2.7 | 6.07 | 34828    | 9.95  | HUMAN | FHSK54 | Serine/threonine protein phosphatase 1 regulatory subunit 10          |
| 22454 | dirMS_041712_NAR_60mM_plus.21123.21123.3   | 3 | 4.61 | 1 | 1.05E-04       | (R)KAKA(K)K A I N E I/A/V/E C L L S L(K)A           | C.Carbon demethylation    | 173.45 | 478.9479 | 1241.535 | -0.0097  | 0.6  | 6.18 | 172185.3 | 7.06  | HUMAN | WR014  | Bifunctional glutamyl-proline-1RNA ligase                             |
| 22455 | dirMS_041712_NAR_60mM_plus.6175.6175.3     | 3 | 4.61 | 1 | 4.61E-05 M22m  | (K)EMDEE(K)E m/D E P E D K A T(K)Q                  | C.Carbon demethylation    | 91.48  | 149.8479 | 1241.535 | -0.0097  | -1   | 4.18 | 7066.2   | 10    | HUMAN | Q9Y256 | Translocation machinery-associated protein 7                          |
| 22456 | dirMS_041712_NAR_60mM_plus.6805.6805.3     | 3 | 4.61 | 0 | 3.98E-05       | (K)ASDPRV(K)K S/P/V/E/A/P Q/D P(H)K                 | C.Carbon demethylation    | 94     | 344.8862 | 1302.255 | -0.0054  | -7.2 | 6.79 | 26585.1  | 5.33  | HUMAN | EPH85  | Lipopolysaccharide-responsive and beige-like anchor protein           |
| 22457 | dirMS_041712_NAR_120mM_minus.16319.16319.3 | 3 | 4.61 | 2 | 1.13E-05       | (K)KGGGLG(Q)G V/G L G P M N/P/L/V/S D P K(R)T       | C.Carbon demethylation    | 143.52 | 636.3552 | 1907.053 | -0.0021  | -1.1 | 9.99 | 22338.2  | 8.65  | HUMAN | QK680  | Perforin-1                                                            |
| 22458 | dirMS_041712_NAR_120mM_minus.16932.16932.3 | 3 | 4.61 | 0 | 4.29E-05       | (K)HLEINP(K)H L/E I/P D/H/V/S I D P(K)R             | C.Carbon demethylation    | 146.85 | 596.3176 | 1786.945 | -0.0064  | -3.6 | 5.27 | 85057.6  | 4.94  | HUMAN | PT9000 | Heat shock protein HSP 90-alpha                                       |
| 22459 | dirMS_041712_NAR_20mM_minus.10397.10397.2  | 2 | 4.6  | 0 | 4.90E-04       | (K)ILODGG(K)Q L/V/D K P A G V/Q/V/V E(K)Q           | C.Carbon demethylation    | 152.72 | 649.8694 | 1298.731 | -0.0001  | 0.1  | 4.37 | 57391.2  | 6.89  | HUMAN | Q43175 | D-3-phosphoglycerate dehydrogenase                                    |
| 22460 | dirMS_041712_NAR_20mM_minus.14359.14359.3  | 3 | 4.61 | 0 | 1.76E-04       | (K)LAVEAL(K)A Y E A L S/L/G/D L G A V G(R)K         | C.Carbon demethylation    | 199.98 | 529.6163 | 1586.838 | -0.0041  | -2.6 | 4.03 | 24286.7  | 4.29  | HUMAN | G3V197 | Creatine kinase B-type (Fragment)                                     |
| 22461 | dirMS_041712_NAR_30mM_minus2.16811.16811.2 | 2 | 4.6  | 0 | 2.88E-05 M223M | (K)DMSDQ(K)M S/V/L/V/Q M G I(K)K                    | C.Carbon demethylation    | 145.07 | 587.2725 | 1537.544 | -0.0057  | 0.7  | 8.34 | 24616.1  | 6.01  | HUMAN | EP0140 | Euplokin                                                              |
| 22462 | dirMS_041712_NAR_30mM_minus2.5061.5061.2   | 2 | 4.6  | 0 | 1.31E-05       | (R)AAQQY(Q)R A I/E/Q V Y T P(K)A                    | C.Carbon demethylation    | 80.97  | 544.2271 | 907.452  | -0.005   | -5.6 | 6.04 | 276046.1 | 6.01  | HUMAN | PA9327 | Fatty acid synthase                                                   |
| 22463 | dirMS_041712_NAR_50mM_minus2.17088.17088.3 | 3 | 4.61 | 0 | 1.97E-05       | (K)GYPPD(K)G V P P D I/F/N L V G K V(K)I            | C.Carbon demethylation    | 166.3  | 526.2832 | 1576.837 | -0.0019  | -1.2 | 6.07 | 40763.2  | 6.29  | HUMAN | QNR845 | Sialic acid synthase                                                  |
| 22464 | dirMS_041712_NAR_60mM_minus.17120.17120.3  | 3 | 4.61 | 0 | 8.20E-04       | (K)LDSSY(K)K L/D/S V T W T/H L V(K)I                | C.Carbon demethylation    | 155.38 | 544.2519 | 1360.747 | -0.0059  | -4.4 | 6.74 | 25746.2  | 6.77  | HUMAN | B4D49  | Proteasome (Prosome, macropain) subunit, alpha type, 6, isoform CRA_a |
| 22465 | dirMS_041712_NAR_120mM_plus.14380.14380.4  | 4 | 4.6  | 1 | 6.34E-05       | (R)ITLUS(R)E T M L O S L/P L V D T M/V S K(R)T      | C.Carbon demethylation    | 128.35 | 456.9482 | 1345.945 | -0.0044  | -2.4 | 5.38 | 53707.8  | 6.06  | HUMAN | FB0760 | Vimentin                                                              |
| 22466 | dirMS_041712_NAR_120mM_plus.14817.14817.2  | 2 | 4.6  | 0 | 9.17E-04       | (K)DWSHYR(R)W S/H Y F(K)K                           | C.Carbon demethylation    | 130.68 | 491.725  | 982.442  | -0.0051  | -1   | 6.74 | 43773.3  | 5.26  | HUMAN | FBV29  | Keratin, type I cytoskeletal 18                                       |
| 22467 | dirMS_041712_NAR_120mM_plus.7979.7979.2    | 2 | 4.6  | 0 | 4.64E-05       | (K)STTGM(K)K T I/T T G H L Y I(K)K                  | C.Carbon demethylation    | 95.25  | 560.8014 | 1120.676 | -0.0042  | -3.7 | 8.34 | 12137.8  | 9.3   | HUMAN | AP6W80 | Elongation factor 1-alpha (1 Fragment)                                |
| 22468 | dirMS_041712_NAR_20mM_plus.6665.6665.2     | 2 | 4.6  | 0 | 7.77E-04 M357M | (K)AELDPT(K)A E I/D T P M(K)K                       | C.Carbon demethylation    | 110.62 | 532.24   | 1047.478 | -0.0052  | 0.3  | 4.03 | 76262.2  | 9.53  | HUMAN | P23246 | Splicing factor, proline- and glutamine-rich                          |
| 22469 | dirMS_041712_NAR_20mM_plus.8172.8172.2     | 2 | 4.6  | 0 | 7.77E-03       | (K)YVGA(K)K T V I G A T A L P(L)K                   | C.Carbon demethylation    | 125.67 | 443.2571 | 985.515  | -0.0083  | -9.4 | 9.41 | 58214.7  | 5.25  | HUMAN | B4D2M7 | T-complex protein 1 subunit theta                                     |
| 22470 | dirMS_041712_NAR_20mM_plus.9485.9485.2     | 2 | 4.6  | 0 | 5.24E-04       | (R)ITLQGN(R)T L I/Q I/Q N C G V A S T I(R)K         | C.Carbon demethylation    | 136.63 | 667.3458 | 1333.689 | -0.0049  | -3.7 | 9.41 | 56186.7  | 5.47  | HUMAN | B4DUR8 | T-complex protein 1 subunit gamma                                     |
| 22471 | dirMS_041712_NAR_30mM_plus2.22300.22300.2  | 2 | 4.6  | 0 | 1.54E-05       | (K)GLSSLL(K)G L S L S L C N F I(K)K                 | C.Carbon demethylation    | 171.95 | 620.3199 | 1239.64  | -0.0077  | -6.2 | 8.75 | 470342.8 | 6.83  | HUMAN | E7EUV0 | DNA-dependent protein kinase catalytic subunit                        |
| 22472 | dirMS_041712_NAR_40mM_plus2.10661.10661.3  | 3 | 4.6  | 0 | 3.47E-04       | (K)ATLSTL(K)K A I S T L G K P A P S L G P S E R(K)K | C.Carbon demethylation    | 127.9  | 575.6528 | 1724.954 | -0.0103  | -6   | 8.41 | 284833.7 | 6.24  | HUMAN | AD4212 | DZFP586019 protein                                                    |
| 22473 | dirMS_041712_NAR_40mM_plus2.15606.15606.3  | 3 | 4.6  | 0 | 1.65E-05       | (K)NIPSPG(K)M L/P P G V A P V T V P R P H V(K)K     | C.Carbon demethylation    | 146.07 | 627.031  | 1879.058 | -0.0051  | -8.8 | 8.76 | 31450.7  | 5.74  | HUMAN | F5H046 | Ras GTPase-activating protein-binding protein 1                       |
| 22474 | dirMS_041712_NAR_40mM_plus2.7961.7961.2    | 2 | 4.6  | 0 | 1.13E-05       | (R)ELMNT(R)E L N I I T A Y(K)K                      | C.Carbon demethylation    | 106.92 | 420.2474 | 859.489  | -0.0008  | -1   | 6.1  | 21113.5  | 10.28 | HUMAN | EMCP9  | 40S ribosomal protein S7                                              |
| 22475 | dirMS_041712_NAR_40mM_plus2.9025.9025.3    | 3 | 4.6  | 1 | 9.66E-04 T293T | (R)YSGRSR(I)R S/G R S I/G/D L R I(A)K               | L.Phosphorylation 1       | 115.02 | 458.8999 | 1297.722 | 79.9629  | -2.5 | 9.57 | 300351.7 | 12.1  | HUMAN | Q9UQ35 | Serine/arginine repetitive matrix protein                             |
| 22476 | dirMS_041712_NAR_50mM_plus2.12745.12745.3  | 3 | 4.6  | 0 | 2.87E-05       | (K)EMNPA(K)E M N/P A I G I/D C L H(K)G              | C.Carbon demethylation    | 135.32 | 499.0106 | 1497.719 | -0.0016  | -1.1 | 5.32 | 49982    | 5.86  | HUMAN | B4D078 | T-complex protein 1 subunit epsilon                                   |
| 22477 | dirMS_041712_NAR_50mM_plus2.12900.12900.3  | 3 | 4.6  | 0 | 2.03E-05       | (K)ILDVA(K)K L/D A V/V/A Q I P L I(H)K              | C.Carbon demethylation    | 135.72 | 487.6117 | 1460.822 | -0.0014  | -1   | 5.32 | 15036.9  | 7.16  | HUMAN | E7E774 | 116 kDa US5 small nuclear ribonucleoprotein component (Fragment)      |
| 22478 | dirMS_041712_NAR_50mM_plus2.9805.9805.3    | 3 | 4.6  | 1 | 4.40E-05       | (K)DMSDQ(K)M S/V/L/V/Q M G I(K)K                    | C.Carbon demethylation    | 119.48 | 566.9992 | 1694.901 | -0.0051  | -4.7 | 4.79 | 53161.2  | 4.99  | HUMAN | EP0140 | Euplokin                                                              |
| 22479 | dirMS_041712_NAR_60mM_plus.10463.10463.3   | 3 | 4.6  | 0 | 9.83E-05       | (K)GYVTC(K)Y A/V I/T T G D M G I I(R)T              | C.Carbon demethylation    | 112.42 | 434.9004 | 1302.68  | 0.0066   | 5    | 6.74 | 139883.7 | 8.06  | HUMAN | P34323 | Coatomer subunit alpha                                                |
| 22480 | dirMS_041712_NAR_60mM_plus.14395.14395.3   | 3 | 4.6  | 1 | 1.29E-06       | (R)IJSIATQ(K)R S/E A T Q A P A L E G R V(K)I        | C.Carbon demethylation    | 131.23 | 486.2466 | 1456.775 | 0.0038   | 2.6  | 6.14 | 104166.4 | 6.25  | HUMAN | BSMCP9 | Tripartite motif-containing protein 66                                |
| 22481 | dirMS_041712_NAR_60mM_plus.16306.16306.3   | 3 | 4.6  | 0 | 3.17E-05       | (R)FVFDPR(R)F V/P D R/P L P S I(K)K                 | C.Carbon demethylation    | 142.47 | 444.917  | 1332.742 | -0.0058  | 1.4  | 9.6  | 18885.5  | 9.45  | HUMAN | B4D0V8 | Proteasome subunit alpha type                                         |
| 22482 | dirMS_041712_NAR_60mM_plus.14048.14048.3   | 3 | 4.6  | 0 | 4.57E-05       | (R)ITVYGL(R)T V P I/S L T S T S(K)K                 | C.Carbon demethylation    | 192.73 | 529.2582 | 1571.758 | -0.0017  | 1.3  | 9.41 | 58214.7  | 5.25  | HUMAN | EP0140 | Euplokin                                                              |
| 22483 | dirMS_041712_NAR_30mM_minus2.17487.17487.2 | 2 | 4.59 | 0 | 2.57E-05       | (R)KSGGQ(R)N G V/G Q I/A L D A I(K)K                | C.Carbon demethylation    | 148.82 | 585.3352 | 1169.664 | -0.0006  | -0.5 | 5.84 | 3424.7   | 5.4   | HUMAN | ABM3V7 | Protein SEC13 homolog                                                 |
| 22484 | dirMS_041712_NAR_30mM_minus2.18060.18060.2 | 2 | 4.59 | 1 | 3.94E-04 M170m | (R)DQKEM(R)D Q/K/E m L E V S G(I)K                  | C.Carbon demethylation    | 152.85 | 632.8097 | 1248.614 | -0.0015  | 2.1  | 4.14 | 19926    | 9.56  | HUMAN | C9J163 | Transmembrane protein 176A                                            |
| 22485 | dirMS_041712_NAR_30mM_minus2.4998.4998.2   | 2 | 4.59 | 0 | 4.35E-04       | (R)NYGQTR(R)W G/Q I T E I(R)M                       | C.Carbon demethylation    | 80.82  | 401.7227 | 802.442  | -0.0036  | -4.5 | 5.97 | 77799.7  | 9.09  | HUMAN | PS2272 | Heterogeneous nuclear ribonucleoprotein M                             |
| 22486 | dirMS_041712_NAR_50mM_minus2.14510.14510.3 | 3 | 4.59 | 0 | 2.67E-03       | (R)SADVD(R)S A V/D Q I/A I G I/D H L R(S)K          | C.Carbon demethylation    | 149.5  | 583.9833 | 1749.924 | 0.0111   | 5.4  | 5.39 | 17202.4  | 4.79  | HUMAN | D6KZ20 | Rap1 GTPase-GDP dissociation stimulator 1 (Fragment)                  |
| 22487 | dirMS_041712_NAR_50mM_minus2.15338.15338.3 | 3 | 4.59 | 0 | 3.28E-05       | (R)LSLQHD(R)I S I/Q I D V P T F S V L V L A(K)K     | C.Carbon demethylation    | 156.07 | 580.9782 | 1740.928 | -0.0046  | -2.6 | 5.32 | 98937.2  | 5.88  | HUMAN | EP9017 | Neuronal alpha-glucosidase AB                                         |
| 22488 | dirMS_041712_NAR_50mM_minus2.7299.7299.3   | 3 | 4.59 | 2 | 6.43E-03       | (R)YIKRNN(R)Y L/R/N N/Y G S R Y(K)K                 | C.Carbon demethylation    | 108.53 | 532.9391 | 1596.792 | 0.011    | 6.9  | 9.82 | 120222.5 | 9.83  | HUMAN | Q9NS56 | E3 ubiquitin-protein ligase Topors                                    |
| 22489 | dirMS_041712_NAR_20mM_plus.17998.17998.2   | 2 | 4.59 | 1 | 1.16E-05       | (R)YIGASS(R)P I/G A S F S K L(K)K                   | C.Carbon demethylation    | 195.05 | 517.3039 | 1033.604 | -0.0035  | -3.4 | 10   | 99203.4  | 5.88  | HUMAN | P25950 | Protein PML                                                           |
| 22490 | dirMS_041712_NAR_20mM_plus.8471.8471.2     | 2 | 4.59 | 0 | 1.70E-05       | (R)KQVTC(K)T A/V C/D P I/P R(K)K                    | C.Carbon demethylation    | 127.77 | 514.7664 | 1028.519 | 0.0062   | 6    | 5.5  | 50199.4  | 4.75  | HUMAN | ABN222 | Tubulin beta-B chain-like protein LOC205334                           |
| 22491 | dirMS_041712_NAR_20mM_plus2.20108.20108.2  | 2 | 4.59 | 0 | 2.07E-05       | (R)YKQV(R)P T W/L S D I/A I G I/D H L R(S)K         | C.Carbon demethylation    | 159.3  | 470.978  | 1366.247 | -0.0051  | 5.9  | 9.47 | 12327.7  | 9.67  | HUMAN | G9V477 | Genital transcription factor II-1                                     |
| 22492 | dirMS_041712_NAR_20mM_plus2.20554.20554.2  | 2 | 4.59 | 0 | 1.61E-05       | (R)ASLLS(R)A S/L S/V/W/Q A M E(K)K                  | C.Carbon demethylation    | 162.53 | 632.321  | 1263.614 | -0.0013  | -1   | 6.05 | 26616.1  | 5.68  | HUMAN | EP9PU0 | Euplokin                                                              |
| 22493 | dirMS_041712_NAR_40mM_plus2.7028.7028.2    | 2 | 4.59 | 0 | 3.88E-04       | (R)IQGGYE(R)Q G V/G Y/G G F R(W)K                   | C.Carbon demethylation    | 101.27 | 457.2098 | 913.416  | -0.0039  | -4.3 | 6    | 17613.9  | 9.53  | HUMAN | B4DQ39 | GTP-binding protein SAR1A                                             |
| 22494 | dirMS_041712_NAR_40mM_plus2.9575.9575.2    | 2 | 4.59 | 0 | 5.93E-04       | (R)INYYEQ(R)N Y/N Y E Q W G(K)K                     | C.Carbon demethylation    | 119.3  | 544.2469 | 1087.484 | -0.0022  | -2   | 6    | 37486.1  | 9.08  | HUMAN | P22626 | Heterogeneous nuclear ribonucleoproteins A2/B1                        |
| 22495 | dirMS_041712_NAR_40mM_plus2.11881.11881.3  | 3 | 4.59 | 1 | 2.94E-05       | (K)IVADY(K)K V/I/V/V/A/K/E I E G G(R)K              | C.Carbon demethylation    | 130.53 | 559.9637 | 1677.881 | -0.0047  | -2.4 | 4.79 | 49883.3  | 7.3   | HUMAN | PA9411 | Histone-derived factor Tu, mitochondrial                              |
| 22496 | dirMS_041712_NAR_60mM_plus.18872.18872.3   | 3 | 4.59 | 2 | 2.25E-05 M456m | (R)KSNDF(K)K L V D E F T R M Y F(K)K                | N.alpha-N-glycosylation 2 | 165.15 | 588.9744 | 1561.82  | 203.0891 | 5.5  | 9.7  | 78298.8  | 5.26  | HUMAN | Q7L312 | Synaptic vesicle glycoprotein 2B                                      |
| 22497 | dirMS_041712_NAR_120mM_minus.6628.6628.3   | 3 | 4.58 | 1 | 1.32E-05       | (K)JAMYE(K)K M A K Y E J E E I(K)K                  | C.Carbon demethylation    | 90.45  | 438.5284 | 1313.568 | 0.0028   | 2.2  | 4.32 | 11829.2  | 4.96  | HUMAN | K7E1U0 | Hsp90                                                                 |

|       |                                            |   |      |                  |                                                        |        |          |          |          |      |      |          |       |       |          |                                                                     |
|-------|--------------------------------------------|---|------|------------------|--------------------------------------------------------|--------|----------|----------|----------|------|------|----------|-------|-------|----------|---------------------------------------------------------------------|
| 22559 | dirMS_041712_NAR_20mM_plus.15133.15133.2   | 2 | 4.56 | 0.588E+04        | (RIEGLAAR)(RIEQLVA)A E F A R (S)                       | 176.1  | 574.312  | 1147.611 | 0.0061   | 5.3  | 4.53 | 44227.3  | 7.81  | HUMAN | E7C0R6   | Plectin protein 1 subunit alpha                                     |
| 22560 | dirMS_041712_NAR_20mM_plus.15267.15267.2   | 2 | 4.56 | 0.639E+04        | (KIVLSVA)(KQVLS)VVV/F/S/D R (R)                        | 175.98 | 655.3293 | 1309.638 | -0.0131  | 10   | 4.21 | 33029.4  | 9.62  | HUMAN | D6R0R0   | Guanine nucleotide-binding protein subunit beta-2-like 1 (Fragment) |
| 22561 | dirMS_041712_NAR_20mM_plus.17794.17794.2   | 2 | 4.56 | 0.7545E+04 M224m | (KIVVLSV)(KQVLS)VVV/F/S/D R (R)                        | 175.98 | 655.3293 | 1309.638 | -0.0024  | 3.7  | 5.51 | 13217.2  | 9.62  | HUMAN | D6R0R0   | Guanine nucleotide-binding protein subunit beta-2-like 1 (Fragment) |
| 22562 | dirMS_041712_NAR_30mM_plus2.16099.16099.2  | 2 | 4.56 | 0.235E+05        | (KQVLAAT)(KAPL)I/LA/T/D V A S (R)                      | 173.7  | 613.8551 | 1226.71  | 0.0074   | 6    | 5.88 | 61018.6  | 9.44  | HUMAN | B4D1W8   | Probable ATP-dependent RNA helicase DDX5                            |
| 22563 | dirMS_041712_NAR_30mM_plus2.17458.17458.2  | 2 | 4.56 | 0.127E+05        | (KQVGLM)(KQV)G/LI/M/W/V/S/K(M)                         | 144.93 | 250.2659 | 1039.532 | -0.0027  | -6.7 | 8.59 | 96306.4  | 5.51  | HUMAN | P13639   | Elongation factor 2                                                 |
| 22564 | dirMS_041712_NAR_30mM_plus2.20418.20418.2  | 2 | 4.56 | 0.312E+05        | (RIEFLAEN)(RIE)F/EI/LN/A D L R (E)                     | 161.05 | 627.3106 | 1253.616 | -0.0027  | -1.7 | 4.14 | 45508.6  | 6.55  | HUMAN | ABKQ7Q   | Heat shock cognate 71 kDa protein                                   |
| 22565 | dirMS_041712_NAR_50mM_plus2.15524.15524.3  | 2 | 4.56 | 1.100E+06        | (RIYRVPT)(RIY)R/V/T A I V/I/L/D E Q T E T R (S)        | 161.05 | 627.3106 | 1253.616 | -0.0024  | -1.2 | 4.32 | 58055.3  | 5.77  | HUMAN | B4DQZ5   | Traglin X mental retardation syndrome-related protein 1             |
| 22566 | dirMS_041712_NAR_50mM_plus2.18930.18930.3  | 3 | 4.56 | 1.270E+05        | (KQJLAQGA)(KQVLA)F/A/G/V/L G E V D (R/A)               | 167.87 | 520.3019 | 1558.895 | -0.004   | 2.6  | 6.07 | 266161   | 5.68  | HUMAN | E9PPU0   | Epiplakin                                                           |
| 22567 | dirMS_041712_NAR_60mM_plus.13882.13882.3   | 3 | 4.56 | 1.489E+05        | (RIYRVRTV)(RIY)R/V/T/V/T/L/D E K (E/G)                 | 129.2  | 439.9237 | 1317.737 | 0.0193   | 14.6 | 6.04 | 567942.4 | 5.76  | HUMAN | H0YGL9   | Ryanodine receptor 2                                                |
| 22568 | dirMS_041712_NAR_60mM_plus.18121.18121.3   | 3 | 4.56 | 0.338E+05        | (RIYSHRE)(RIY)S G H E Q V/E/M/L/D L R (E)              | 151.43 | 504.9258 | 1512.747 | -0.0153  | 10.1 | 4.65 | 48586.6  | 5.32  | HUMAN | D6R2C8   | Ankyrin-3                                                           |
| 22569 | dirMS_041712_NAR_120mM_minus.13850.13850.3 | 3 | 4.55 | 1.535E+05        | (KQASHEA)(KQV)S/H/V A V T/D G E F E A M L V (R/H)      | 130.1  | 596.2973 | 1786.879 | -0.0109  | -1.1 | 5.45 | 80254.2  | 9.05  | HUMAN | Q0P4K4   | Alpha actinin-4 short isoform                                       |
| 22570 | dirMS_041712_NAR_120mM_minus.18261.18261.4 | 4 | 4.55 | 2.195E+05 S2335  | (KQVLAQGA)(KQVLA)F/A/G/V/L G E V D (R/A)               | 154.23 | 548.2945 | 1842.022 | -0.017   | 9.1  | 5.7  | 31393.3  | 5.1   | HUMAN | FRAGM8   | Plectin (Fragment)                                                  |
| 22571 | dirMS_041712_NAR_120mM_minus.18264.18264.4 | 4 | 4.55 | 2.227E+05        | (KQIPQVHR)(KQ)P/H V R E R A W/L T V E K (V)            | 154.08 | 484.763  | 1936.019 | 0.0114   | 5.9  | 6.76 | 107013.3 | 6.48  | HUMAN | PG04D0   | Retinoblastoma-associated protein                                   |
| 22572 | dirMS_041712_NAR_120mM_minus.5704.5704.3   | 3 | 4.55 | 1.331E+04        | (KILKSSETY)(R)K L S S E T V Y S Q (A/K)                | 84.58  | 414.5544 | 1241.637 | 0.0114   | 9.2  | 8.5  | 59953.2  | 6.14  | HUMAN | G3V1R8   | NOLL/NOP250 domain family, member 2, isoform CRA_b                  |
| 22573 | dirMS_041712_NAR_120mM_minus.7061.7061.3   | 3 | 4.55 | 0.583E+05        | (KNIKLTGAT)(KQV)I/V T A Y T W A E R (L)                | 93.1   | 411.2157 | 1231.643 | -0.0104  | -8.5 | 6    | 36488    | 9.61  | HUMAN | QBH9V9   | Olfactory receptor 51C1                                             |
| 22574 | dirMS_041712_NAR_120mM_minus.7837.7837.3   | 3 | 4.55 | 1.352E+05        | (KQVAGG)(KQV)G/D K A E E I G (R/H)                     | 97.23  | 427.2116 | 1225.628 | 0.0045   | 3.5  | 4.68 | 272489.3 | 5.79  | HUMAN | O15220   | Spectrin beta chain, non-cytosolic 2                                |
| 22575 | dirMS_041712_NAR_20mM_minus.11015.11015.2  | 2 | 4.55 | 0.564E+05 S3805  | (RIYSGVR)(RIY)G V P S C S/V A S P (R/T)                | 159.3  | 496.895  | 1285.584 | 203.0863 | 4.7  | 8.75 | 75584.8  | 7.92  | HUMAN | O14640   | Segment polarity protein dishevelled homolog DVL-1                  |
| 22576 | dirMS_041712_NAR_20mM_minus.12103.12103.3  | 3 | 4.55 | 1.405E+05        | (-K)STDT(SA)-(-)X S T D T S M/N/S R (K/L)              | 170.55 | 446.227  | 1336.652 | 0.0139   | 10.4 | 8.75 | 4969.6   | 8.59  | HUMAN | K7ELN8   | Matrix metalloproteinase-28 (Fragment)                              |
| 22577 | dirMS_041712_NAR_20mM_minus.9266.9266.2    | 2 | 4.55 | 0.129E+05 M55m   | (RIYVIGM)(RIY)I J G M T L V Q (K)                      | 142.9  | 509.8017 | 1002.602 | 15.0095  | 4.0  | 8.72 | 21005.6  | 5.12  | HUMAN | Q04760   | Lactacylglycine lyase                                               |
| 22578 | dirMS_041712_NAR_40mM_minus.10692.10692.3  | 3 | 4.55 | 0.428E+04        | (RIIDAGEL)(RIY)A G E G L A/L V/D I T D Q E G K P (R)   | 147.53 | 657.0157 | 1969.024 | -0.0099  | 4.5  | 4.32 | 25215.9  | 5.48  | HUMAN | E7E9P5   | Filamin-B                                                           |
| 22579 | dirMS_041712_NAR_50mM_plus2.9037.9037.3    | 3 | 4.55 | 0.599E+04 S8B    | (RIJAAQGF)(RIY)A G G P A G P A G A G V Q L P (R)       | 119.88 | 514.9262 | 1462.776 | 79.9879  | 14   | 9.79 | 14385.2  | 11.75 | HUMAN | Q8NTS2.2 | Isoform 2 of Choriogonadotropin subunit beta variant 2              |
| 22580 | dirMS_041712_NAR_60mM_plus.17098.17098.3   | 3 | 4.55 | 1.347E+04        | (KQIDREGF)(K)D R E G F F T/N L G T L G A (K)           | 155.48 | 424.6145 | 1625.828 | 0.0008   | 0.5  | 6.07 | 9954.3   | 9.57  | HUMAN | C3U07    | Profilin-2                                                          |
| 22581 | dirMS_041712_NAR_120mM_plus.13975.13975.4  | 4 | 4.55 | 0.794E+05 N64m   | (RIYGAUVRI)(R)G A V L L L G H G D S V (R/E)            | 126.32 | 478.0137 | 1705.934 | 203.0986 | 10.1 | 6.71 | 73369.4  | 4.48  | HUMAN | E7E8M8   | Proteohistidin-15                                                   |
| 22582 | dirMS_041712_NAR_120mM_plus.7972.7972.4    | 4 | 4.55 | 2.133E+05 M43m   | (KQAEKGE)(K)A E E K E W/D/L S R V M L N K (K)          | 95.17  | 491.2553 | 1944.001 | 15.9982  | 1.7  | 4.87 | 96757.6  | 5.95  | HUMAN | C3U9R    | Filamin A-interacting protein 1-like (Fragment)                     |
| 22583 | dirMS_041712_NAR_120mM_plus.8758.8758.3    | 3 | 4.55 | 1.008E+05        | (RIYRFLER)(R)P L E D S T A L R (R)                     | 96.58  | 405.8796 | 1215.613 | -0.0096  | 3.7  | 5.8  | 31393.3  | 6.31  | HUMAN | E9P9V1   | Plectin (Fragment)                                                  |
| 22584 | dirMS_041712_NAR_20mM_plus.9202.9202.4     | 4 | 4.55 | 1.590E+05 T4481  | (RIYRHYRH)(R)G L R Y R P/D I E S V S (R)               | 101.47 | 487.2578 | 1742.918 | 203.091  | 6    | 6.75 | 173713.6 | 9.03  | HUMAN | Q9P2E5   | Disco-interacting protein 2 homolog B                               |
| 22585 | dirMS_041712_NAR_20mM_plus.15328.15328.2   | 2 | 4.55 | 0.238E+04 M73m   | (RIJALVDL)(R)I A L V/D L V P G T D M S V S (R)         | 176.97 | 816.4181 | 1615.836 | 15.9929  | -1.2 | 4.03 | 27549.9  | 4.39  | HUMAN | E9P8I4   | Tubulin beta chain                                                  |
| 22586 | dirMS_041712_NAR_20mM_plus.6680.6680.2     | 2 | 4.55 | 0.762E+04 M12m   | (-)mmV(LV)(-)(mm)V(E) A A D A V(D)(K)                  | 110.9  | 548.754  | 1154.312 | 31.9892  | -0.5 | 4.37 | 9475.6   | 4.64  | HUMAN | K3R0D5   | Cytosolic non-specific dipeptidase (Fragment)                       |
| 22587 | dirMS_041712_NAR_20mM_plus2.12822.12822.2  | 2 | 4.55 | 0.273E+05        | (KQVLAQGA)(KQVLA)F/A/G/V/L G E V D (R/A)               | 129.77 | 585.961  | 961.569  | -0.0024  | 3.4  | 5.21 | 30811.1  | 6.14  | HUMAN | Q11611   | Semly-regulated protein                                             |
| 22588 | dirMS_041712_NAR_30mM_plus2.19495.19495.2  | 2 | 4.55 | 0.299E+05        | (KILAQGM)(KQV)K L G A H P D A (R)                      | 156.58 | 505.2602 | 1109.517 | 0.0033   | 3    | 5.32 | 218451.1 | 8.24  | HUMAN | QB77D2   | Protein Shroox3                                                     |
| 22589 | dirMS_041712_NAR_40mM_plus2.10577.10577.2  | 2 | 4.55 | 0.156E+05        | (RIJGLDQ)(R)G L Q/D V L R (T)                          | 128.1  | 404.736  | 800.462  | -0.0026  | -3.2 | 5.84 | 54920    | 7.15  | HUMAN | B4DXD0   | T-complex protein 1 subunit zeta-2                                  |
| 22590 | dirMS_041712_NAR_40mM_plus2.5264.5264.2    | 2 | 4.55 | 0.131E+05        | (RIYDYGVR)(R)Y S G Q V (R)                             | 87.43  | 444.6967 | 888.385  | 0.0015   | 1.7  | 5.83 | 70523.3  | 4.94  | HUMAN | G3V153   | Caprin-1                                                            |
| 22591 | dirMS_041712_NAR_40mM_plus2.1145.1145.2    | 2 | 4.55 | 0.341E+05 M23m   | (KQVYFPA)(R)I V G V I A G A C T G G I H P T T G Q (L)  | 101.85 | 474.7319 | 948.525  | -0.0045  | -4.7 | 8.12 | 41522.6  | 7.08  | HUMAN | Q7ZD40   | Transcription elongation regulator 1                                |
| 22592 | dirMS_041712_NAR_40mM_plus2.8282.8282.2    | 2 | 4.55 | 1.432E+04        | (RIYSGNRE)(R)S O Z N G E H H R N (R)                   | 109.49 | 613.7818 | 1226.562 | -0.0058  | 4.7  | 6.86 | 61239.6  | 6.22  | HUMAN | H7C022   | WD repeat-containing protein 60 (Fragment)                          |
| 22593 | dirMS_041712_NAR_50mM_plus2.12253.12253.3  | 3 | 4.55 | 0.298E+05        | (KQISLSSA)(K)S I L S L S A F H V F D G N G (E)         | 132.42 | 617.6485 | 1850.928 | 0.0026   | 1.4  | 5.32 | 116924.5 | 6.22  | HUMAN | E9P2C6   | Mitotic checkpoint serine/threonine-protein kinase BUB1             |
| 22594 | dirMS_041712_NAR_50mM_plus2.19328.19328.3  | 3 | 4.55 | 0.127E+05        | (RIYSPSHS)(R)S P I S H G N T I A/L F (R)               | 169.75 | 558.3077 | 1671.917 | -0.0084  | -5   | 9.75 | 77292.9  | 5.96  | HUMAN | QB0Q70   | Transcription factor 25                                             |
| 22595 | dirMS_041712_NAR_50mM_plus.11956.11956.3   | 3 | 4.55 | 1.108E+06        | (RIYQADHR)(R)K A Q V E Q E U T T L R (L)               | 120.05 | 515.2885 | 1544.204 | -0.0011  | 0.7  | 6.14 | 53377.8  | 5.74  | HUMAN | Q15149   | Plectin                                                             |
| 22596 | dirMS_041712_NAR_50mM_plus.16923.16923.3   | 3 | 4.55 | 1.861E+05 C302k  | (KQIPAPQ)(KQ)P A P D I V S M T P E R (M)               | 145.52 | 469.2606 | 1291.726 | 114.0416 | 3.9  | 6.07 | 70389.1  | 5.6   | HUMAN | A4U149   | SRF domain-containing protein 21                                    |
| 22597 | dirMS_041712_NAR_120mM_minus.7356.7356.3   | 3 | 4.54 | 0.310E+04        | (RIYIHQGE)(R)T L H G Q E T T Y T P (R/L)               | 94.37  | 334.8558 | 1302.644 | -0.0008  | -0.6 | 6.41 | 35021.8  | 6.18  | HUMAN | B4D4F7   | Protein misto homolog 1                                             |
| 22598 | dirMS_041712_NAR_20mM_minus.8730.8730.2    | 2 | 4.54 | 1.988E+04        | (RIYSDIOL)(R)S Y R/D L V D K P R (R)                   | 137.25 | 575.3098 | 1149.601 | -0.0112  | 9.8  | 8.31 | 37704.1  | 10.13 | HUMAN | QBNAV1   | Pre-mRNA-splicing factor 38A                                        |
| 22599 | dirMS_041712_NAR_30mM_minus.16819.16819.2  | 2 | 4.54 | 1.151E+05        | (RIYTFSGT)(R)I G T Y S K A K (T)                       | 145.58 | 431.7497 | 862.499  | -0.0071  | -8.3 | 10   | 19068    | 5.59  | HUMAN | Q13322   | Protein phosphatase 1 regulatory subunit 1A                         |
| 22600 | dirMS_041712_NAR_30mM_minus.17245.17245.2  | 2 | 4.54 | 2.004E+04        | (RIYVQVAV)(R)I V G V I A G A C T G G I H P T T G Q (L) | 147.95 | 484.224  | 1077.489 | -0.0017  | -8.1 | 8.5  | 24247    | 6.18  | HUMAN | C3U7R2   | Proteohistidin-15 (Fragment)                                        |
| 22601 | dirMS_041712_NAR_30mM_plus2.5163.5163.2    | 2 | 4.54 | 0.156E+05        | (RIJAAQGF)(RIY)A G G P A G P A G A G V Q L P (R)       | 81.5   | 454.2217 | 907.452  | -0.0075  | -5.6 | 6.04 | 27046.1  | 6.01  | HUMAN | F3Y283   | Fatty acid synthase                                                 |
| 22602 | dirMS_041712_NAR_30mM_minus.12765.12765.3  | 3 | 4.54 | 0.274E+05        | (KQASDAAD)(K)A S D I A M T S V L P P/T H P I (R)       | 140.63 | 607.3158 | 1819.937 | -0.0042  | 2.3  | 5.32 | 12926.1  | 4.4   | HUMAN | E7M2M0   | 14-3-3 protein epsilon (Fragment)                                   |
| 22603 | dirMS_041712_NAR_50mM_plus2.13752.13752.3  | 3 | 4.54 | 1.201E+04        | (RIYSDGVR)(R)G S/D I V/P P S K V D E F E M Q (Y)       | 146.8  | 657.9852 | 1971.937 | 0.0024   | 2.1  | 4.32 | 83273.6  | 5.55  | HUMAN | P31010   | X-ray repair cross-complementing protein 5                          |
| 22604 | dirMS_041712_NAR_50mM_plus2.15678.15678.3  | 3 | 4.54 | 1.235E+05        | (KQVDFSL)(K)H S/D V A L S G V G P F A (K/A)            | 155.6  | 583.3014 | 1747.983 | -0.0049  | -2.2 | 4.32 | 41827.5  | 7.08  | HUMAN | Q7ZD40   | Phosphorylase kinase                                                |
| 22605 | dirMS_041712_NAR_50mM_plus2.16148.16148.3  | 3 | 4.54 | 0.199E+05        | (RIYDFPHI)(R)E D I H L N V A (R)                       | 160.65 | 454.5974 | 1361.779 | -0.0011  | 0.8  | 5.32 | 267260.7 | 5.95  | HUMAN | Q13305   | Acetyl-CoA carboxylase 1                                            |
| 22606 | dirMS_041712_NAR_50mM_plus2.17981.17981.3  | 3 | 4.54 | 1.142E+04        | (KQVPTGPT)(K)G V P/T G F I L P I R (D/T)               | 171.02 | 518.6444 | 1553.916 | 0.0024   | 1.6  | 9.6  | 114409.8 | 9.02  | HUMAN | F5H2F4   | C1-tetrahydrofolate synthase, cytoplasmic                           |
| 22607 | dirMS_041712_NAR_60mM_minus.15150.15150.3  | 3 | 4.54 | 1.235E+04        | (KQREIADG)(K)R E I A O G V/L C L V E G (K/M)           | 143.95 | 567.965  | 1701.884 | -0.0035  | -2.1 | 4.41 | 18253.3  | 4.7   | HUMAN | E9P9F7   | Translationally-controlled tumor protein (Fragment)                 |
| 22608 | dirMS_041712_NAR_60mM_minus.18587.18587.3  | 3 | 4.54 | 0.272E+05        | (KQILHNDI)(K)H S/D N L I I V D L E N T V (K)           | 165.78 | 575.3117 | 1723.922 | -0.0019  | -1.1 | 5.54 | 88624.6  | 5.09  | HUMAN | Q13041   | Clysoxin-A (Fragment)                                               |
| 22609 | dirMS_041712_NAR_60mM_minus.7947.7947.3    | 3 | 4.54 | 1.100E+06        | (RIYQVADHR)(R)K A Q V E Q E U T T L R (L)              | 97.58  | 550.6199 | 1649.821 | -0.0018  | 0.9  | 6.83 | 73781.3  | 6.33  | HUMAN | Q9P871   | Phosphoglucomutase 2                                                |

|       |                                           |   |      |           |                                                             |         |          |           |          |       |      |          |       |       |        |                                                                                  |
|-------|-------------------------------------------|---|------|-----------|-------------------------------------------------------------|---------|----------|-----------|----------|-------|------|----------|-------|-------|--------|----------------------------------------------------------------------------------|
| 22668 | dirMS_041712_NAR_40mM_minus14738.14738.3  | 3 | 4.51 | 0.880E-04 | (K)VLVGGN(K)N(L)V/LG/S N H S L P F L R(K)                   | 171.6   | 513.3088 | 1537.91   | 0.0018   | 1.2   | 8.76 | 25486.85 | 5.51  | HUMAN | J3KML6 | Protein transport protein Sec16A                                                 |
| 22669 | dirMS_041712_NAR_50mM_minus12821.12821.3  | 3 | 4.51 | 0.674E-05 | M114m (R)AGGTR(G)R A G K P V C G A T Q M L E S m I K(K)     | 140.27  | 636.9917 | 1876.969  | 31.9192  | -0.7  | 8.64 | 18466.1  | 5.78  | HUMAN | H3B3U3 | Pyruvate kinase (Fragment)                                                       |
| 22670 | dirMS_041712_NAR_50mM_minus16368.16368.3  | 4 | 4.51 | 0.532E-04 | (K)ITTEEN(K)T T A L L A L V G E R(T)                        | 151.93  | 457.2553 | 1370.837  | -0.0052  | -1.8  | 8.75 | 52689.1  | 4.73  | HUMAN | ABM6P7 | Serine/threonine protein phosphatase 2A 65 kDa regulatory subunit A beta isoform |
| 22671 | dirMS_041712_NAR_60mM_minus13808.13808.3  | 3 | 4.51 | 1.200E-05 | (R)GRTS(R)R L T E S R R V L G G/L(R)                        | 131.773 | 452.9408 | 1356.796  | 0.0121   | 8.9   | 9.6  | 8236.7   | 6.46  | HUMAN | JK30H  | Ephrin type 2 receptor 6                                                         |
| 22672 | dirMS_041712_NAR_60mM_minus14430.14430.3  | 3 | 4.51 | 2.629E-05 | K184k (R)VAIVAA(R)K V I A A E G E M N A S R A L K(E)        | 140.22  | 625.0044 | 1758.953  | 114.0456 | 1.4   | 8.63 | 26077.8  | 6.86  | HUMAN | B4ZV5  | Erythrocyte band 7 integral membrane protein                                     |
| 22673 | dirMS_041712_NAR_60mM_minus15541.15541.3  | 3 | 4.51 | 1.197E-05 | (R)IASLVA(R)R S I L I S A V D V S K L R(R)                  | 146.126 | 420.5811 | 1259.732  | -0.0023  | -2.4  | 8.79 | 41088.1  | 5.18  | HUMAN | F5H442 | Tumor susceptibility gene 101 protein                                            |
| 22674 | dirMS_041712_NAR_60mM_minus17893.17893.2  | 3 | 4.51 | 1.132E-05 | (K)RSLTAL(K)Y E S T T I L A L V G E R(T)                    | 151.93  | 457.2553 | 1370.837  | -0.0052  | -1.8  | 8.75 | 52689.1  | 4.73  | HUMAN | ABM6P7 | Serine/threonine protein phosphatase 2A 65 kDa regulatory subunit A beta isoform |
| 22675 | dirMS_041712_NAR_120mM_plus20720.20720.4  | 4 | 4.51 | 2.823E-06 | (R)AAADW(F)K A I D W F D D G E N I G(L)                     | 160.27  | 491.0027 | 1360.992  | -0.0026  | -1.3  | 5.38 | 49181.   | 4.93  | HUMAN | K7EFT6 | TATA-binding protein-associated factor 2N                                        |
| 22676 | dirMS_041712_NAR_120mM_plus5083.5083.3    | 3 | 4.51 | 1.822E-05 | M163m (K)YEDGG(K)Y/E D G D D M D K R(R)                     | 79.62   | 458.195  | 1356.754  | 15.9968  | 1.4   | 4.03 | 21341.9  | 7.77  | HUMAN | OS3R70 | Calcylin-binding protein                                                         |
| 22677 | dirMS_041712_NAR_20mM_plus13907.13907.3   | 3 | 4.51 | 0.132E-04 | (R)IGLCAA(R)R C L V A A Q/A E S V R(Y)                      | 167.38  | 430.2281 | 1288.668  | 0.002    | 1.5   | 6    | 18529.2  | 9.98  | HUMAN | EPRL45 | 40S ribosomal protein S3                                                         |
| 22678 | dirMS_041712_NAR_20mM_plus17933.17933.2   | 2 | 4.51 | 0.197E-05 | 599S (R)YVGLAR (R)R D G L A F V N A D F V A S K(G)          | 105.15  | 890.4414 | 1576.822  | 203.0358 | -14.4 | 4.03 | 27007.4  | 5.06  | HUMAN | YHC2N7 | Leucine-rich repeat and WD repeat-containing protein 1 (Fragment)                |
| 22679 | dirMS_041712_NAR_20mM_plus12205.12205.3   | 2 | 4.51 | 2.432E-05 | (R)AAETAT(R)R E A T G G G/L(R)                              | 116.8   | 462.1667 | 1301.667  | -0.0074  | -0.7  | 9.56 | 46312.6  | 6.1   | HUMAN | B4DQK6 | Advanced glycosylation end product-specific receptor                             |
| 22680 | dirMS_041712_NAR_40mM_plus2.11397.11397.2 | 2 | 4.51 | 0.495E-04 | M320m (K)YIMACC(K)Y m I A C C L L Y R(G)                    | 133.118 | 633.2788 | 1249.553  | 15.9977  | 2.2   | 5.99 | 50706.6  | 5.68  | HUMAN | AN6H42 | Tubulin alpha chain-like 3                                                       |
| 22681 | dirMS_041712_NAR_40mM_plus2.15211.15211.3 | 3 | 4.51 | 0.132E-05 | (R)EIT M L G D V A V A V M P H P(K)                         | 156.07  | 457.2886 | 1379.851  | -0.0078  | -4.9  | 5.32 | 141718.6 | 6.88  | HUMAN | IB0V43 | Valine-tRNA ligase                                                               |
| 22682 | dirMS_041712_NAR_40mM_plus2.5822.5822.2   | 2 | 4.51 | 1.168E-05 | (R)SKDAE(R)R S K Q A E V E I(F)                             | 92.11   | 484.2219 | 1367.437  | -0.0002  | -0.2  | 4.25 | 71231.7  | 9.22  | HUMAN | FE7R3  | Threonine-tRNA ligase, cytoplasmic                                               |
| 22683 | dirMS_041712_NAR_50mM_plus2.11821.11821.3 | 3 | 4.51 | 5.333E-05 | K465k (K)DAVLE(K)D A K Y L V A A L A N S(K)                 | 140.47  | 555.3048 | 1542.858  | 114.0931 | -8.3  | 8.43 | 56594.1  | 5.35  | HUMAN | Q16403 | 26S proteasome non-ATPase regulatory subunit 5                                   |
| 22684 | dirMS_041712_NAR_50mM_plus2.7154.7154.3   | 3 | 4.51 | 1.289E-04 | T3911Y386 (K)MDSY(K)D Y S I K K H V Y G N G V S Y(K)        | 103.15  | 655.273  | 1803.866  | 159.9384 | 2.9   | 9.31 | 57499.4  | 5.77  | HUMAN | Q15223 | Pollivorus receptor-related protein 1                                            |
| 22685 | dirMS_041712_NAR_120mM_minus12457.12457.3 | 3 | 4.51 | 2.914E-05 | (K)JARENE(K)R A L E N E I A A T Y(R)                        | 121.97  | 445.9006 | 1335.701  | -0.0143  | -10.7 | 6.19 | 51151.6  | 4.99  | HUMAN | OT6014 | Keratin, type 1 cuticular Ha7                                                    |
| 22686 | dirMS_041712_NAR_120mM_minus3675.3675.3   | 3 | 4.5  | 1.197E-05 | (K)RSLQCE(K)R S L Q V Q/A D A A E R A(E)                    | 106.9   | 539.2683 | 1615.803  | -0.0131  | -8.1  | 4.41 | 31923.6  | 4.85  | HUMAN | B7Z596 | Tropomyosin alpha-1 chain                                                        |
| 22687 | dirMS_041712_NAR_20mM_minus1016.10161.3   | 3 | 4.5  | 0.306E-04 | (K)FESLSE(K)Y E D L S Q A Q/A A A A E K(F)                  | 151.12  | 538.9478 | 1614.833  | -0.0045  | -2.8  | 4.14 | 206102.3 | 9.72  | HUMAN | EP9AV3 | Nascent polypeptide-associated complex subunit alpha                             |
| 22688 | dirMS_041712_NAR_40mM_minus213571.13571.3 | 3 | 4.5  | 1.139E-05 | (R)ICTDPO(K)R I T D P Q T G L C L L P L K K(K)              | 164.02  | 662.684  | 1986.04   | -0.0024  | -1.2  | 6.07 | 53377.8  | 5.74  | HUMAN | Q15149 | Plectin                                                                          |
| 22689 | dirMS_041712_NAR_40mM_minus15638.15638.3  | 3 | 4.5  | 0.190E-05 | (K)GAELVE(K)G E A V E L V L S L P A V R(Q)                  | 182.13  | 535.3104 | 1603.917  | 0        | 0     | 5.4  | 52378.2  | 6.32  | HUMAN | C9ZEA  | 26S proteasome non-ATPase regulatory subunit 6                                   |
| 22690 | dirMS_041712_NAR_50mM_minus12304.12304.3  | 3 | 4.5  | 2.006E-04 | T2081 M110 (K)LAGIEA(K)G L A E A P R M R S D N K(E)         | 138.1   | 588.9539 | 1545.78   | 219.0669 | -4.2  | 8.75 | 47309.8  | 10.2  | HUMAN | Q15697 | Zinc finger protein 174                                                          |
| 22691 | dirMS_041712_NAR_50mM_minus17807.17807.3  | 3 | 4.5  | 1.228E-05 | M110m (R)EALLAG (R)R L L A L L V L L D M L P A E K D E K(G) | 170.82  | 634.3353 | 1884.999  | 15.9927  | -1.2  | 4.18 | 25448.6  | 6     | HUMAN | Q10041 | Peroxisome-5                                                                     |
| 22692 | dirMS_041712_NAR_50mM_minus17946.17946.3  | 3 | 4.5  | 0.159E-05 | (R)HPLFAT(R)H L P L S A V D V A S K(G)                      | 170.4   | 586.3248 | 1756.963  | 19.017   | -0.5  | 6.75 | 49012.3  | 6.49  | HUMAN | ABM10E | Tubulin alpha class II                                                           |
| 22693 | dirMS_041712_NAR_60mM_minus11842.11842.3  | 3 | 4.5  | 1.461E-05 | M232m (R)IMSXm(R)I M S K E K E V Q D L V M N V Q N(K)       | 125.58  | 647.3011 | 1923.897  | 15.9915  | -1.8  | 4.68 | 40069.4  | 4.83  | HUMAN | ETEVR1 | Tubulin beta chain                                                               |
| 22694 | dirMS_041712_NAR_60mM_minus14762.14762.3  | 3 | 4.5  | 1.406E-05 | (R)IKIIGD(R)K I V G D P L L E D T R(M)                      | 142.42  | 457.2595 | 1369.769  | -0.0046  | -3.4  | 4.56 | 47309.6  | 5.42  | HUMAN | B4DXV7 | 4-trimethylaminobutyraldehyde dehydrogenase                                      |
| 22695 | dirMS_041712_NAR_60mM_minus14961.14961.3  | 3 | 4.5  | 1.252E-05 | (K)YHLYG(K)A I L V Q P L P L D R(N)                         | 154.6   | 504.9409 | 1512.821  | -0.0128  | -8.4  | 8.49 | 42989.1  | 4.64  | HUMAN | IK3KH7 | Nucleosome assembly protein 1-like 1                                             |
| 22696 | dirMS_041712_NAR_60mM_minus1627.1627.3    | 3 | 4.5  | 1.232E-04 | T93L (R)M226(K)R T A C A S E V L V L V R(Q)                 | 110.21  | 582.9367 | 1539.748  | -0.0003  | -0.4  | 9.49 | 2719.6   | 5.35  | HUMAN | Q15149 | Plectin                                                                          |
| 22697 | dirMS_041712_NAR_60mM_minus3855.8355.3    | 3 | 4.5  | 0.755E-04 | (K)HTGPN(K)M T G P S N P D T A M D N G F Y R(K)             | 106.42  | 562.2608 | 1684.767  | 0.0005   | 0.3   | 5.21 | 18511.8  | 5.62  | HUMAN | D6R70  | Heterogeneous nuclear ribonucleoprotein B                                        |
| 22698 | dirMS_041712_NAR_120mM_plus.6460.6460.2   | 2 | 4.5  | 0.142E-05 | (R)ELTEDE(R)R L T E D V E E K(L)                            | 123.7   | 481.7305 | 962.468   | -0.014   | -14.5 | 4    | 22102.8  | 5.03  | HUMAN | PO8590 | Myosin light chain 3                                                             |
| 22699 | dirMS_041712_NAR_120mM_plus11622.11622.2  | 2 | 4.5  | 1.099E-05 | (K)LTTPAV(K)I T T P A V V S E R(K)                          | 151.6   | 522.8186 | 1048.636  | -0.0062  | -5.7  | 6    | 13798.9  | 10.17 | HUMAN | PE2851 | 40S ribosomal protein S25                                                        |
| 22700 | dirMS_041712_NAR_120mM_plus3268.3268.2    | 2 | 4.5  | 0.249E-05 | M388m (R)ITYSYD(K)I T S Y S D L L L A L V G E R(T)          | 131.23  | 576.8207 | 1134.6204 | -0.0091  | -3.4  | 4.3  | 59854.2  | 6.18  | HUMAN | Q15149 | Plectin                                                                          |
| 22701 | dirMS_041712_NAR_50mM_plus2.12587.12587.3 | 3 | 4.5  | 1.823E-05 | (R)IYVADY(R)Y M V A D K F T E L Q(K)                        | 134.55  | 491.5877 | 1472.745  | 0.0032   | -2.2  | 6.07 | 57818.1  | 5.5   | HUMAN | EP9H38 | Serine/threonine protein phosphatase 2A 65 kDa regulatory subunit alpha isoform  |
| 22702 | dirMS_041712_NAR_50mM_plus2.17962.17962.3 | 3 | 4.5  | 0.249E-05 | (R)YTMFL(R)Y T M F L F L G L H N V R(Q)                     | 162.78  | 467.267  | 1397.788  | -0.0014  | -1    | 9.73 | 21721.5  | 5.37  | HUMAN | H7R235 | Aspartate-tRNA ligase, cytoplasmic                                               |
| 22703 | dirMS_041712_NAR_60mM_plus10737.10737.3   | 3 | 4.5  | 1.685E-05 | (R)KJAKGN(R)K A G N F Y V A P A E P L(K)                    | 114.58  | 440.9704 | 1320.695  | 0.013    | 9.8   | 8.5  | 24489.6  | 10.74 | HUMAN | ABM10E | 60S ribosomal protein L7                                                         |
| 22704 | dirMS_041712_NAR_60mM_plus20486.20486.3   | 3 | 4.5  | 1.694E-05 | (K)KYPEN(K)K N P V F N V L T L R(G)                         | 107.97  | 480.6056 | 1439.805  | -0.0023  | -1.6  | 8.59 | 35222.3  | 5.74  | HUMAN | ADN063 | Serine/threonine protein phosphatase                                             |
| 22705 | dirMS_041712_NAR_120mM_minus10961.10961.3 | 3 | 4.49 | 1.236E-05 | (R)ITMKEV(R)I T M K E V Q E L Q L D R(F)                    | 114.1   | 428.9368 | 1581.797  | 0.0004   | -4.1  | 4.41 | 49709.6  | 5.64  | HUMAN | BOYCA  | Vimentin                                                                         |
| 22706 | dirMS_041712_NAR_120mM_minus16592.16592.3 | 3 | 4.49 | 0.643E-05 | (R)IEHALLA(R)H A L L A V T L G V K I(G)                     | 140.45  | 438.9186 | 1314.742  | -0.0004  | -0.3  | 6.85 | 50482.3  | 9.31  | HUMAN | PE8304 | Elongation factor 1-alpha 1                                                      |
| 22707 | dirMS_041712_NAR_120mM_minus18574.18574.3 | 3 | 4.49 | 1.133E-05 | (R)JAREE(R)R A R F E L I N A D V L R(G)                     | 155.98  | 494.2561 | 1480.754  | -0.0006  | -0.4  | 4.68 | 45508.6  | 5.5   | HUMAN | AKB7Q2 | Heat shock cognate 71 kDa protein                                                |
| 22708 | dirMS_041712_NAR_20mM_minus9023.9023.2    | 2 | 4.49 | 0.302E-05 | T271M380 (R)QPEW(R)P E R W L V P m G L V L V                | 139.95  | 570.3397 | 1280.609  | 210.6269 | -7.6  | 5.24 | 3896.4   | 6.92  | HUMAN | Y7E19  | ATP-dependent RNA helicase DHX8 (Fragment)                                       |
| 22709 | dirMS_041712_NAR_20mM_minus6084.6084.3    | 3 | 4.49 | 0.254E-05 | (K)ITSEYK(K)Y T S E Y S D L L L A L V G E R(T)              | 131.23  | 576.8207 | 1134.6204 | -0.0091  | -3.4  | 4.3  | 59854.2  | 6.18  | HUMAN | Q15149 | Plectin                                                                          |
| 22710 | dirMS_041712_NAR_20mM_minus14226.14226.3  | 3 | 4.49 | 0.234E-05 | (K)KIDAGG(K)D L I A G E L G L S V S                         | 138.65  | 461.9064 | 1383.705  | -0.0003  | -0.2  | 6.74 | 45758.7  | 7.83  | HUMAN | B4DL12 | Isochrinate dehydrogenase [NADP]                                                 |
| 22711 | dirMS_041712_NAR_120mM_plus14584.14584.4  | 4 | 4.49 | 2.839E-05 | (R)YLVTY(R)Y L V T L V I T D K E A K(E)                     | 130.45  | 454.2533 | 1813.995  | -0.0022  | -1.8  | 6.18 | 7621.9   | 10.1  | HUMAN | JK3T73 | 60S ribosomal protein L38                                                        |
| 22712 | dirMS_041712_NAR_120mM_plus23653.23653.3  | 3 | 4.49 | 0.717E-05 | (R)HLFMP(R)H F F M P A G P A V L S R(G)                     | 102.53  | 540.9492 | 1620.835  | -0.0025  | -1.5  | 9.75 | 42230.8  | 4.77  | HUMAN | AN6N28 | Putative tubulin beta chain-like protein ENSP0000290377                          |
| 22713 | dirMS_041712_NAR_120mM_plus8224.8224.2    | 2 | 4.49 | 0.852E-04 | (K)FVACV(K)R T A V E Q P V P R(K)                           | 122.53  | 514.7864 | 1028.519  | 0.0023   | 0.6   | 5.5  | 50199.4  | 6.05  | HUMAN | EP9H38 | Serine/threonine protein phosphatase 2A 65 kDa regulatory subunit alpha isoform  |
| 22714 | dirMS_041712_NAR_30mM_plus2.20165.20165.2 | 2 | 4.49 | 0.205E-05 | (R)JALFPL(R)R A L F L V P R(N)                              | 169.05  | 415.2703 | 829.529   | 0.0039   | -4.7  | 9.79 | 40728.4  | 4.05  | HUMAN | C9U338 | TBRF2 and NCK-interacting protein kinase (Fragment)                              |
| 22715 | dirMS_041712_NAR_30mM_plus2.20551.20551.2 | 2 | 4.49 | 0.879E-04 | (K)SIVTSP(K)S V I T S V S F I F G V K(N)                    | 152.57  | 518.799  | 1306.604  | -0.013   | -12.5 | 8.47 | 132902.3 | 5.82  | HUMAN | JKR24  | Isoleucine-tRNA ligase, cytoplasmic                                              |
| 22716 | dirMS_041712_NAR_30mM_plus2.4900.4900.2   | 2 | 4.49 | 0.186E-05 | (K)NCSETA(K)N C S E T Q V Y S K(V)                          | 177     | 623.256  | 1245.505  | -0.0028  | -0.4  | 4.53 | 28473.3  | 4.8   | HUMAN | PE1981 | 14-3-3 protein gamma                                                             |
| 22717 | dirMS_041712_NAR_30mM_plus2.8177.8177.2   | 2 | 4.49 | 0.588E-05 | (R)JLAAVA(R)R L A T A E I A V A A E R A(E)                  | 97.15   | 451.2545 | 901.499   | -0.0025  | 3.1   | 4.53 | 268433.7 | 6.24  | HUMAN | ADJ212 | D4ZFYB006b19 protein                                                             |
| 22718 | dirMS_041712_NAR_40mM_plus16131.16131.3   | 3 | 4.49 | 1.138E-05 | M253m (K)YVTEIK(K)I L I H N R V L V L V G E R(T)            | 161.52  | 660.0113 | 1758.97   | -0.0089  | -17.4 | 9.99 | 9071.6   | 5.17  | HUMAN | Q9R8K1 | Zinc finger protein GLE1                                                         |
| 22719 | dirMS_041712_NAR_40mM_plus                |   |      |           |                                                             |         |          |           |          |       |      |          |       |       |        |                                                                                  |





|       |                                          |   |      |                  |                                                  |        |          |          |          |      |         |          |       |        |                              |                                                                             |
|-------|------------------------------------------|---|------|------------------|--------------------------------------------------|--------|----------|----------|----------|------|---------|----------|-------|--------|------------------------------|-----------------------------------------------------------------------------|
| 22995 | dirMS_041712_NAR_30mM_minus18738.18738.2 | 2 | 4.38 | 0.104E+05        | (K)IGFGG(K)G F)G V)G G)A L(R)Y                   | 156.73 | 473.7762 | 946.547  | -0.0018  | -1.9 | 9.75    | 47760.5  | 5.39  | HUMAN  | BZ7P8                        | Eukaryotic peptide chain release factor subunit 1                           |
| 22996 | dirMS_041712_NAR_30mM_minus25101.5101.2  | 2 | 4.38 | 0.431E+05        | (R)DTDFE(R)R D)T)G)E)P)M)G)R                     | 81.38  | 482.445  | 963.42   | 0.0017   | 1.8  | 4.37    | 89567.6  | 4.94  | HUMAN  | PO790                        | Head shock protein HSP 90-alpha                                             |
| 22997 | dirMS_041712_NAR_30mM_minus7897.7897.2   | 2 | 4.38 | 0.238E+05        | (K)KLAKEE(L)K A)E)E)E)A)R)K                      | 96.52  | 521.7554 | 1045.51  | -0.0009  | 0.8  | 4.35    | 50131.4  | 6.15  | HUMAN  | PR036                        | Glycylglycyl synthetase, mitochondrial                                      |
| 22998 | dirMS_041712_NAR_30mM_minus5746.9746.2   | 2 | 4.38 | 0.133E+05        | (R)DTDFE(R)R D)T)G)E)P)M)G)R                     | 107.12 | 495.2705 | 1098.543 | -0.0089  | -8.1 | 4.21    | 55935.4  | 6.1   | HUMAN  | Y90                          | Protein piccolo                                                             |
| 22999 | dirMS_041712_NAR_30mM_minus10960.10960.3 | 3 | 4.38 | 0.126E+05        | (K)TLPLG(K)K)I)P)I)P)V)G)T)R)P                   | 121.03 | 417.5985 | 1250.783 | -0.0021  | -1.7 | 9.41    | 30375.1  | 9.54  | HUMAN  | EP916                        | Histone acetyltransferase KATS (Fragment)                                   |
| 23000 | dirMS_041712_NAR_20mM_plus10016.10016.2  | 2 | 4.38 | 0.169E+05        | (K)IGAVT(K)K)E)A)T)V)S)F)D)P)S)A)K)A             | 140.63 | 610.8324 | 1420.659 | -0.0015  | -1.1 | 4.03    | 53724.2  | 9.54  | HUMAN  | H38P67                       | RNA-binding protein FUS                                                     |
| 23001 | dirMS_041712_NAR_20mM_plus16193.16193.2  | 2 | 4.38 | 0.541E+04        | (K)IALLTP(K)K)I)T)P)V)A)A)G)R)K                  | 182.97 | 576.373  | 1152.71  | -0.0026  | -2.8 | 9.79    | 58263.6  | 9.15  | HUMAN  | PR036                        | Glycylglycyl synthetase, mitochondrial                                      |
| 23002 | dirMS_041712_NAR_20mM_plus7360.7360.3    | 3 | 4.38 | 0.214E+05        | (K)GTGQAK(K)T)G)Q)A)P)G)Y)S)E)A)A)N)K)N          | 115.53 | 476.8963 | 1426.675 | -0.001   | -0.7 | 8.16    | 11447.2  | 9.81  | HUMAN  | CB197                        | Cytochrome c (Fragment)                                                     |
| 23003 | dirMS_041712_NAR_20mM_plus7485.7485.2    | 2 | 4.38 | 0.126E+04 M136m  | (K)JGmN(M)K)E)G)M)N)M)Y)E)A)M)R)I)R              | 121.47 | 465.7891 | 1278.582 | 31.9892  | -0.4 | 4.25    | 18240.4  | 7.96  | HUMAN  | PE2937                       | Peptidyl-prolyl cis-trans isomerase A                                       |
| 23004 | dirMS_041712_NAR_20mM_plus977.977.2      | 2 | 4.38 | 0.715E+04        | (R)DTDFE(R)R D)T)G)E)P)M)G)R)S)S)G)P)E           | 130.95 | 890.9015 | 1780.578 | -0.0027  | -1.5 | 4.03    | 51260.6  | 5.39  | HUMAN  | PE1978                       | Heterogeneous nuclear ribonucleoprotein K                                   |
| 23005 | dirMS_041712_NAR_20mM_plus13575.13575.2  | 2 | 4.38 | 0.798E+05        | (K)NDSLGS(K)K)L)S)I)E)G)S)I)A)T)R                | 125.25 | 488.2554 | 975.511  | -0.0007  | -7.2 | 4.37    | 53377.8  | 5.74  | HUMAN  | Q15149                       | Plectin                                                                     |
| 23006 | dirMS_041712_NAR_30mM_plus12536.12536.2  | 2 | 4.38 | 0.549E+05        | (K)NMLAV)K)M)N)I)A)M)A)G)R)K                     | 132.3  | 471.266  | 945.511  | -0.0022  | -1.2 | 6       | 21332    | 6.15  | HUMAN  | HOY36                        | Proteasome subunit alpha type 7 (Fragment)                                  |
| 23007 | dirMS_041712_NAR_40mM_plus12098.10958.3  | 3 | 4.38 | 0.644E+04        | (K)SLVYAE(K)K)N)V)I)A)E)Y)H)S)P)E)D)E)K)I        | 130.73 | 664.6419 | 1991.233 | -0.0121  | -6.1 | 4.25    | 54815.2  | 9.17  | HUMAN  | PD2596                       | Probable ATP-dependent RNA helicase DDX6                                    |
| 23008 | dirMS_041712_NAR_30mM_plus11739.11739.2  | 2 | 4.38 | 0.207E+05        | (R)JFFGQ(L)R)P)G)Q)K)N)A)D)A)P)R)K               | 135.52 | 565.7995 | 1130.555 | -0.0036  | -3.1 | 5.84    | 42230.8  | 4.77  | HUMAN  | ANK28                        | Putative tubulin beta chain-like protein ENSP0000290377                     |
| 23009 | dirMS_041712_NAR_40mM_plus6097.6097.2    | 2 | 4.38 | 0.566E+04        | (R)QMPTR)R)Q)A)I)P)N)T)M)R)K                     | 94.88  | 474.2383 | 947.469  | 0        | 0    | 9.75    | 56491.1  | 7.78  | HUMAN  | B4D7Q2                       | Elongation factor 1 gamma                                                   |
| 23010 | dirMS_041712_NAR_50mM_plus21564.1564.3   | 3 | 4.38 | 0.118E+05        | (K)NLDV)K)K)N)L)Q)Y)A)T)I)H)E)A)T)K)I            | 150.87 | 554.456  | 1160.854 | -0.0025  | -1.5 | 5.32    | 44311.6  | 8.52  | HUMAN  | BZ7P9                        | Aspartate aminotransferase                                                  |
| 23011 | dirMS_041712_NAR_50mM_plus218112.18112.3 | 3 | 4.38 | 0.109E+05        | (K)KLEPKP(K)K)M)E)M)E)P)P)V)V)R)K                | 163.5  | 427.6021 | 1280.794 | -0.0019  | -1.5 | 6.07    | 44183.5  | 5.64  | HUMAN  | FSGCK8                       | Succinyl-CoA ligase (ADP-forming) subunit beta, mitochondrial               |
| 23012 | dirMS_041712_NAR_50mM_plus20539.20539.3  | 3 | 4.38 | 0.215E+05        | (R)JAGLLO)R)A)G)R)A)D)L)R)S)F)A)N)M)E)P)F)K)I    | 175.73 | 641.6672 | 1922.991 | -0.0035  | -1.8 | 8.79    | 54259.1  | 5.04  | HUMAN  | B8Z20                        | Actin threase-like protein 1                                                |
| 23013 | dirMS_041712_NAR_50mM_plus21372.21372.3  | 3 | 4.38 | 0.432E+05 T3571  | (K)IKHQV(K)K)I)K)Q)I)F)I)D)I)N)K)I               | 182.82 | 583.67   | 1545.9   | 203.9955 | 9.2  | 8.59    | 65679.7  | 4.98  | HUMAN  | DBRC00                       | Cancer-associated gene 1 protein (Fragment)                                 |
| 23014 | dirMS_041712_NAR_120mM_minus0619.619.3   | 3 | 4.37 | 0.330E+05 S1313S | (R)D)N)K)R)G)G)N)A)N)L)E)A)G)K)I                 | 91.13  | 446.2012 | 1133.507 | 203.0821 | 2.1  | 4.14    | 409960.1 | 5.82  | HUMAN  | Q15191                       | Zinc finger homeobox protein 3                                              |
| 23015 | dirMS_041712_NAR_120mM_minus8112.8112.3  | 3 | 4.37 | 0.138E+05        | (R)I)Y)F)A)R)Y)E)A)A)C)A)C)G)R)K                 | 98.67  | 425.2036 | 1285.599 | -0.0031  | -2.4 | 8.5     | 24827.2  | 5.74  | HUMAN  | H3858E                       | E3 ubiquitin-protein ligase CHIP (Fragment)                                 |
| 23016 | dirMS_041712_NAR_20mM_minus11603.11603.2 | 2 | 4.37 | 0.140E+05        | (R)I)Y)E)F)E)R)I)E)Y)E)F)E)D)I)K)I               | 164.38 | 604.8043 | 1208.604 | -0.0032  | -2.6 | 4       | 30992.3  | 6.14  | HUMAN  | B2RE8B                       | Protein SET                                                                 |
| 23017 | dirMS_041712_NAR_20mM_minus9604.9604.2   | 2 | 4.37 | 0.343E+05        | (R)I)Q)A)E)R)I)Q)A)E)R)E)G)E)G)K)I               | 146.05 | 500.7862 | 1000.567 | -0.0022  | -2.2 | 4.53    | 37296.3  | 5.3   | HUMAN  | FRVU64                       | Keratin, type II cytoskeletal 8                                             |
| 23018 | dirMS_041712_NAR_30mM_minus12238.12238.2 | 2 | 4.37 | 0.421E+05        | (R)I)S)G)I)P)R)K)G)Y)I)I)P)D)T)H)K)I             | 119.03 | 497.265  | 993.525  | -0.0024  | -2.4 | 5.55    | 17045.4  | 4.25  | HUMAN  | HDV0U                        | Endoplasmic reticulum                                                       |
| 23019 | dirMS_041712_NAR_30mM_minus10807.10807.3 | 3 | 4.37 | 0.211E+04        | (K)I)K)Q)K)K)A)R)E)Q)Y)E)R)D)M)A)A)M)K)A         | 128.58 | 604.9489 | 181.825  | -0.0027  | 3.7  | 4.32    | 28196    | 4.76  | HUMAN  | F19146                       | 16-3 protein beta/alpha                                                     |
| 23020 | dirMS_041712_NAR_50mM_minus6593.6593.3   | 3 | 4.37 | 0.133E+05 M185m  | (R)I)D)F)Y)S)R)D)F)T)N)S)A)H)M)D)D)K)Q)K         | 103.32 | 538.5571 | 1581.667 | 31.9895  | -0.2 | 4.41    | 26945.8  | 8.07  | HUMAN  | IK3SD2                       | Eukaryotic initiation factor 4A1 (Fragment)                                 |
| 23021 | dirMS_041712_NAR_50mM_minus7215.7215.3   | 3 | 4.37 | 0.443E+04        | (R)I)G)P)E)I)S)R)G)T)P)E)I)S)T)A)R)E)K)I         | 134.97 | 314.572  | 1301.706 | -0.0045  | -3.5 | 6.14    | 54427.4  | 5.96  | HUMAN  | K4D09                        | Acetyl-CoA carboxylase 1                                                    |
| 23022 | dirMS_041712_NAR_60mM_minus1407.11407.3  | 3 | 4.37 | 0.932E+04        | (R)I)E)A)D)P)R)I)E)I)A)Q)D)I)D)I)R)K)I           | 126.83 | 445.9007 | 1335.69  | -0.0028  | -2.1 | 4.56    | 14166.5  | 11.62 | HUMAN  | B4D81E                       | Histone H3                                                                  |
| 23023 | dirMS_041712_NAR_60mM_minus14116.14116.3 | 3 | 4.37 | 0.303E+05        | (R)I)E)A)D)P)R)I)E)I)A)Q)D)I)D)I)R)K)I           | 138.93 | 499.2617 | 1491.157 | 10.5     | 6.75 | 10156.7 | 10.05    | HUMAN | PD0565 | Adenosine kinase isoenzyme 1 |                                                                             |
| 23024 | dirMS_041712_NAR_60mM_minus4382.4382.3   | 3 | 4.37 | 0.645E+04        | (K)I)Q)E)I)R)K)K)G)U)E)T)P)D)T)D)R)I)R)M         | 109.37 | 587.2377 | 1642.803 | -0.0034  | 2.1  | 4.32    | 46648.4  | 9.67  | HUMAN  | B4D4Z2                       | Splicing factor 1                                                           |
| 23025 | dirMS_041712_NAR_120mM_plus7076.7076.3   | 3 | 4.37 | 0.515E+05        | (R)I)E)E)E)R)I)N)T)E)E)G)A)K)Y)K)I               | 90.52  | 404.2038 | 1210.955 | 0.0018   | 1.5  | 4.79    | 83344.9  | 10.18 | HUMAN  | EP9049                       | Bcl-2-associated transcription factor 1 (Fragment)                          |
| 23026 | dirMS_041712_NAR_20mM_plus14404.14404.2  | 2 | 4.37 | 0.170E+05 M118m  | (R)I)A)I)P)Q)A)R)I)P)L)P)Q)A)M)G)V)A)Y)E)R)I     | 169.57 | 765.8991 | 1514.8   | 15.9914  | -2.3 | 6.05    | 38189.2  | 9.55  | HUMAN  | QBKX7                        | Kelch domain-containing protein 8B                                          |
| 23027 | dirMS_041712_NAR_20mM_plus14887.14887.2  | 2 | 4.37 | 0.145E+04        | (K)I)Y)S)E)A)A)I)S)A)I)T)A)T)G)I)A)G)R)K         | 115.45 | 446.2012 | 1133.507 | -0.0026  | -3.9 | 5.37    | 26928.1  | 6.05  | HUMAN  | IK3SD3                       | 60S ribosomal protein L11                                                   |
| 23028 | dirMS_041712_NAR_20mM_plus15775.15775.3  | 3 | 4.37 | 0.877E+05        | (R)I)S)S)P)R)I)S)S)F)Y)I)N)Q)I)T)G)G)K)Q)K       | 179.37 | 490.9251 | 1470.759 | 0.002    | 1.4  | 8.31    | 17630.6  | 11.62 | HUMAN  | IK3L05                       | Profilin-1 (Fragment)                                                       |
| 23029 | dirMS_041712_NAR_20mM_plus17338.17338.2  | 2 | 4.37 | 0.128E+05 M38m   | (R)I)M)I)M)G)R)I)M)L)K)E)D)W)I)T)A)S)I)N)S)N)E   | 101.81 | 481.4709 | 1745.947 | 15.9879  | -4   | 5.84    | 5981.8   | 5.64  | HUMAN  | ANKH2C                       | Small nuclear ribonucleoprotein E                                           |
| 23030 | dirMS_041712_NAR_20mM_plus18705.18705.2  | 2 | 4.37 | 0.932E+04        | (K)I)A)Y)T)T)T)K)I)T)W)Y)T)I)U)D)Y)T)K)I         | 200.78 | 683.8948 | 1366.783 | -0.0005  | -0.4 | 5.83    | 42194.9  | 8.75  | HUMAN  | E7EMM4                       | Actin ceramidase                                                            |
| 23031 | dirMS_041712_NAR_20mM_plus9187.9187.2    | 2 | 4.37 | 0.720E+04        | (K)I)A)Y)T)T)T)K)I)T)W)Y)T)I)U)D)Y)T)K)I         | 134.45 | 489.7674 | 978.525  | 0.0021   | 2.1  | 5.88    | 15522.2  | 8.52  | HUMAN  | ANKW05                       | Peroxisome D2, isoform CRA_A                                                |
| 23032 | dirMS_041712_NAR_30mM_plus14315.14315.2  | 2 | 4.37 | 0.859E+05 M320m  | (R)I)M)I)M)G)R)I)M)L)K)E)D)W)I)T)A)S)I)N)S)N)E   | 127.25 | 633.2777 | 1240.553 | 15.9925  | 0.5  | 8.59    | 50706.6  | 5.68  | HUMAN  | ANKH2E                       | Tubulin alpha chain beta-2                                                  |
| 23033 | dirMS_041712_NAR_30mM_plus21992.21992.2  | 2 | 4.37 | 0.195E+04        | (R)I)Y)F)G)I)P)R)I)E)G)Y)G)I)K)I                 | 170.62 | 440.7682 | 880.529  | 0        | 0    | 8.72    | 23999.1  | 9.48  | HUMAN  | P23284                       | Peptidyl-prolyl cis-trans isomerase B                                       |
| 23034 | dirMS_041712_NAR_40mM_plus20150.20150.3  | 3 | 4.37 | 0.166E+05        | (R)I)A)D)S)U)R)I)D)A)S)L)A)L)H)F)I)N)K)I         | 190.77 | 486.2654 | 1456.78  | 0.0022   | 1.5  | 5.21    | 42755    | 7.81  | HUMAN  | BZ7F4                        | T-complex protein 1 subunit delta                                           |
| 23035 | dirMS_041712_NAR_40mM_plus7110.7110.2    | 2 | 4.37 | 0.349E+04        | (R)I)T)S)E)E)K)I)T)A)T)E)A)E)R)I                 | 101.7  | 567.78   | 1134.564 | -0.011   | -9.7 | 4.25    | 3940.9   | 9.27  | HUMAN  | FSH08                        | Lactate dehydrogenase                                                       |
| 23036 | dirMS_041712_NAR_50mM_plus10788.10788.3  | 3 | 4.37 | 0.202E+05        | (R)I)Y)Y)P)R)I)Y)R)Y)P)D)I)A)W)D)P)P)I)A)R)I     | 123.78 | 471.266  | 945.511  | -0.0027  | 2    | 4.4     | 37147.3  | 6.15  | HUMAN  | SEPT12                       | Septin-2                                                                    |
| 23037 | dirMS_041712_NAR_50mM_plus16279.16279.3  | 3 | 4.37 | 0.145E+05        | (R)I)Y)Y)P)R)I)Y)R)Y)P)D)I)A)W)D)P)P)I)A)R)I     | 152.55 | 560.9825 | 1680.943 | -0.0102  | -6.1 | 5.96    | 49949.9  | 5.43  | HUMAN  | FSH06                        | Neutral alpha-glucosidase AB                                                |
| 23038 | dirMS_041712_NAR_60mM_plus13239.13239.3  | 3 | 4.37 | 0.128E+05        | (K)A)A)A)K)Q)A)A)G)A)G)A)E)R)I)R)I               | 126.13 | 476.5985 | 1427.785 | -0.0043  | -3.7 | 4.79    | 53377.8  | 5.74  | HUMAN  | Q15149                       | Plectin                                                                     |
| 23039 | dirMS_041712_NAR_60mM_plus16510.16510.3  | 3 | 4.37 | 0.681E+05        | (K)S)P)Q)E)K)S)P)Q)E)F)F)D)I)H)Y)T)K)I           | 142.77 | 488.5776 | 1463.717 | 0.0001   | 1.2  | 5.3     | 25381.9  | 10.49 | HUMAN  | EP90D7                       | 40S ribosomal protein S2                                                    |
| 23040 | dirMS_041712_NAR_60mM_plus17151.17151.3  | 3 | 4.37 | 0.354E+05        | (K)I)Q)I)D)K)R)I)E)A)G)G)T)G)A)I)Q)D)E)G)W)P)K)I | 146.62 | 475.5976 | 1424.778 | -0.0001  | -0.1 | 5.96    | 51524.1  | 4.82  | HUMAN  | FSH02                        | Protein disulfide-isomerase                                                 |
| 23041 | dirMS_041712_NAR_120mM_minus0330.0330.3  | 3 | 4.36 | 0.152E+05        | (R)I)Y)F)K)D)E)R)I)E)R)V)A)Q)D)Q)Y)I)A)R)I       | 107    | 455.2407 | 1363.715 | -0.0075  | -5.5 | 8.35    | 34581.1  | 5.47  | HUMAN  | H38R35                       | Eukaryotic peptide chain release factor GTP-binding subunit ER3A (Fragment) |
| 23042 | dirMS_041712_NAR_20mM_minus8518.8518.2   | 2 | 4.37 | 0.129E+04        | (R)I)Y)E)E)T)R)I)E)I)E)T)Y)T)K)I                 | 134.38 | 671.3246 | 1341.642 | -0.0001  | -0.1 | 4.09    | 54214.9  | 5.66  | HUMAN  | IK3R13                       | Caldesmon (Fragment)                                                        |
| 23043 | dirMS_041712_NAR_30mM_minus1611.611.2    | 2 | 4.36 | 0.192E+05        | (R)I)Q)G)E)R)I)G)I)E)A)F)R)I)R)K)I               | 90.7   | 475.7203 | 950.433  | 0.0007   | 0.7  | 4.53    | 80254.2  | 5.05  | HUMAN  | DPKX4                        | Actin activator 4 short isoform                                             |
| 23044 | dirMS_041712_NAR_30mM_minus10838.10838.3 | 3 | 4.36 | 0                |                                                  |        |          |          |          |      |         |          |       |        |                              |                                                                             |







|       |                                             |      |                       |                                                        |        |          |          |          |       |      |          |       |       |                                                                                                       |
|-------|---------------------------------------------|------|-----------------------|--------------------------------------------------------|--------|----------|----------|----------|-------|------|----------|-------|-------|-------------------------------------------------------------------------------------------------------|
| 23322 | dirMS_041712_NAR_60mM_minus.20176.20176.3   | 4.24 | 1.492E-05             | (R)KEGGG(R)K E G G L G P L N(I)P/L/L A D V T R(R)      | 186.08 | 621.6933 | 1863.07  | -0.0045  | -2.4  | 6.07 | 12525.2  | 5.82  | HUMAN | PEROXIDIN 2, isoform CRA_a                                                                            |
| 23323 | dirMS_041712_NAR_60mM_plus.7907.7907.3      | 4.24 | 0.420E-04 T3741       | (R)TAAAL(R)T/A I A /L/A/H T E L R(A)                   | 103.87 | 462.9072 | 1183.643 | 203.0641 | -1.1  | 6.41 | 64002.3  | 9.02  | HUMAN | Leucine-rich repeat-containing protein 47                                                             |
| 23324 | dirMS_041712_NAR_50mM_minus.151812.151812.3 | 4.24 | 0.191E-05             | (R)QYDSD(R)Q Y D D S L P Q V L P R(R)                  | 175.72 | 483.3565 | 1365.701 | -0.0071  | -6.5  | 4.37 | 516265   | 6.58  | HUMAN | Rub GTP dissociation inhibitor beta                                                                   |
| 23325 | dirMS_041712_NAR_120mM_plus.11676.11676.4   | 4.24 | 2.385E-05             | (R)YESTD(R)E Y S L T/D/S P/L G S G K E K(L)            | 114.12 | 478.2542 | 1909.975 | 0.0197   | 10.3  | 4.78 | 88025    | 4.97  | HUMAN | Heck short protein HSP 90-beta                                                                        |
| 23326 | dirMS_041712_NAR_120mM_plus.12305.12305.4   | 4.24 | 1.245E-06 M5383       | (R)SPLSD(R)S F L S/G V L G P/M A K(N)/K(A)             | 117.45 | 449.7412 | 1592.847 | 203.0965 | -9.0  | 10   | 39781    | 9.18  | HUMAN | Uncharacterized protein Clor120                                                                       |
| 23327 | dirMS_041712_NAR_120mM_plus.9621.9621.4     | 4.24 | 1.367E-05 M181        | (K)KMFHD(K)M F Y I Q H G/V/V/S V L T(K)                | 104.42 | 442.2427 | 1749.972 | 15.7969  | -9.5  | 10.7 | 97747.5  | 9.56  | HUMAN | Potassium/Isolated hyperpolarization-activated cyclic nucleotide-gated channel 2                      |
| 23328 | dirMS_041712_NAR_20mM_plus.151022.151022.2  | 4.24 | 0.576E-04             | (R)KDGSTG(R)K D L T E G Q/V/P/R(R)                     | 155.72 | 483.3565 | 1365.701 | -0.0071  | -6.5  | 4.37 | 516265   | 6.58  | HUMAN | Rub GTP dissociation inhibitor beta                                                                   |
| 23329 | dirMS_041712_NAR_20mM_plus.18531.18531.2    | 4.24 | 0.789E-04             | (R)WVWGL(R)W V I V L G/L P R(R)                        | 198.85 | 483.3247 | 965.651  | -0.0085  | -8.8  | 9.72 | 25847.9  | 6.33  | HUMAN | Platelet-activating factor acetyltransferase II subunit gamma                                         |
| 23330 | dirMS_041712_NAR_20mM_plus.8808.8808.2      | 4.24 | 0.305E-03             | (R)DQVAVY(R)V A/V A/Q V Y K(K)                         | 131.12 | 493.2543 | 985.499  | 0.0024   | -2.4  | 5.83 | 14130.9  | 9.56  | HUMAN | Single-stranded DNA-binding protein (Fragment)                                                        |
| 23331 | dirMS_041712_NAR_30mM_plus.18438.18438.2    | 4.24 | 0.236E-05             | (R)KGNVNI(R)K N Q V N Y V E/P T(R)                     | 150.27 | 630.8035 | 1260.601 | -0.0021  | -10.8 | 6    | 20513.6  | 4.62  | HUMAN | J3QHS3 Myosin regulatory light chain 12A                                                              |
| 23332 | dirMS_041712_NAR_40mM_plus.15321.15321.3    | 4.24 | 1.211E-04             | (R)HMQD(R)R I A Q/D Y Q V I/L K A/D G I S F P(R)       | 105.8  | 661.6783 | 1983.018 | 0.0021   | -1.1  | 4.56 | 22338.2  | 8.65  | HUMAN | Peroxidase 1                                                                                          |
| 23333 | dirMS_041712_NAR_40mM_plus.18807.18807.3    | 4.24 | 0.395E-05             | (R)EALV(R)E A L V Q/L F V Q/L G L R(A)                 | 179.2  | 601.0141 | 1801.03  | -0.0038  | -11.7 | 5.4  | 43318.8  | 7.18  | HUMAN | Tryptophan-tryptophan ligase, cytoplasmic                                                             |
| 23334 | dirMS_041712_NAR_50mM_plus.6943.6943.3      | 4.24 | 1.165E-05             | (R)IGVLTG(R)G V/L/V/G S P/E Q K E A A K(L)             | 100.93 | 585.2837 | 1672.839 | -0.0023  | -11.4 | 4.49 | 295149.3 | 7.4   | HUMAN | Translational activator GCN1                                                                          |
| 23335 | dirMS_041712_NAR_60mM_plus.10570.10570.3    | 4.24 | 1.684E-05             | (R)RLKAEAL(R)K A E A E L/L/Q/Q K E(K)                  | 112.97 | 466.9362 | 1398.795 | -0.0011  | -10.8 | 11.4 | 533778   | 5.74  | HUMAN | Plectin                                                                                               |
| 23336 | dirMS_041712_NAR_60mM_plus.17431.17431.3    | 4.24 | 1.374E-05             | (R)KVKPVT(R)K V P V T A/I E/D/D E Q T T F R(R)         | 148.18 | 650.0017 | 1948.002 | -0.0117  | -6    | 4.32 | 86688.3  | 5.77  | HUMAN | Fragile X mental retardation syndrome-related protein 1                                               |
| 23337 | dirMS_041712_NAR_60mM_plus.19975.19975.3    | 4.24 | 1.502E-05             | (R)IGKQD(R)K F V D Q/L F G Q/K(L)                      | 164.73 | 501.2665 | 1275.769 | -0.0004  | -9.3  | 5.96 | 26945.8  | 8.07  | HUMAN | Eukaryotic initiation factor 4d (Fragment)                                                            |
| 23338 | dirMS_041712_NAR_120mM_minus.10139.10139.4  | 4.23 | 1.250E-05 T1021 T1021 | (R)R1LSP(R)S F V S/K/P/D/D L Q/L T K(R)                | 100.3  | 495.2441 | 1818.001 | 159.9338 | -9.7  | 8.5  | 24054.6  | 6.98  | HUMAN | Zinc finger protein uba-4                                                                             |
| 23339 | dirMS_041712_NAR_120mM_minus.12364.12364.2  | 4.23 | 0.231E-05             | (R)KLSVND(K)H L S/V N D/H P V G R(S)                   | 121.13 | 603.8309 | 1206.659 | -0.0044  | -3.7  | 6.4  | 26123.4  | 7.07  | HUMAN | Thioredoxin-dependent peroxide reductase, mitochondrial                                               |
| 23340 | dirMS_041712_NAR_120mM_minus.18253.18253.4  | 4.23 | 1.484E-05             | (K)EMVEP(K)E M V/E L/P R/L P A/D F K(A)                | 154.6  | 420.737  | 1679.93  | -0.004   | -2.4  | 6.86 | 90004.9  | 5.14  | HUMAN | Thioredoxin endoplasmic reticulum ATPase                                                              |
| 23341 | dirMS_041712_NAR_120mM_minus.5924.5924.3    | 4.23 | 2.311E-05 M151N       | (R)HJHRS(R)R I A E R S/R G E Q/P(R)                    | 85.25  | 463.5589 | 1185.597 | 203.0651 | -10.3 | 6.14 | 17244.2  | 5.2   | HUMAN | Uncharacterized protein Clor158 (Fragment)                                                            |
| 23342 | dirMS_041712_NAR_120mM_minus.6056.6056.3    | 4.23 | 0.207E-04 T4271       | (R)NJVNVE(R)N V V V N E S I E R(L)                     | 86.4   | 417.525  | 1047.507 | 203.0539 | -2.0  | 4.53 | 67078.7  | 4.91  | HUMAN | Myelin-associated glycoprotein                                                                        |
| 23343 | dirMS_041712_NAR_20mM_minus.11557.11557.2   | 4.23 | 0.848E-04             | (R)TALVTR(R)A T V L/V/T V A/I E/D Q(K)                 | 163.22 | 626.3282 | 1251.658 | -0.0088  | -7    | 4.37 | 24376.8  | 5.68  | HUMAN | Protein arginine N-methyltransferase 1 (Fragment)                                                     |
| 23344 | dirMS_041712_NAR_20mM_minus.7541.7541.3     | 4.23 | 0.844E-05 M238M       | (K)VEQDE(K)E V D E Q M/L N/Q N(K)                      | 123.83 | 488.2327 | 1446.689 | 15.9942  | -0.5  | 4.14 | 40069.4  | 4.83  | HUMAN | Tubulin beta chain                                                                                    |
| 23345 | dirMS_041712_NAR_30mM_minus.14019.14019.2   | 4.23 | 0.285E-05             | (K)CDPDM(K)C D I P F P V M(R)                          | 129.62 | 455.7144 | 910.416  | 0.0059   | -5.9  | 5.84 | 21005.6  | 5.12  | HUMAN | Lactofylloglycin lyase                                                                                |
| 23346 | dirMS_041712_NAR_60mM_minus.10630.10630.3   | 4.23 | 0.921E-03             | (R)KFGNSH(K)N G S/W V/S P F K(V)                       | 119.33 | 423.8906 | 1275.648 | 0.0022   | -7.6  | 6.76 | 28315.9  | 5.48  | HUMAN | Filamin-B                                                                                             |
| 23347 | dirMS_041712_NAR_60mM_minus.13411.13411.3   | 4.23 | 0.340E-05 M4092M      | (K)KLNHQGG(K)N L/N/Q/G E L M L K(L)                    | 134.98 | 480.9305 | 1311.725 | 130.052  | -9.8  | 5.6  | 60954.7  | 5.28  | HUMAN | Microtubule-actin cross-linking factor 1, isoforms 1/2/3/5                                            |
| 23348 | dirMS_041712_NAR_60mM_minus.14033.14033.3   | 4.23 | 1.164E-05 M1012N      | (R)KIVDFM(R)K V I D F m/Q/Q G D T F R(G)               | 138.1  | 548.2737 | 1626.831 | 15.9757  | -11.7 | 5.93 | 23799.1  | 9.48  | HUMAN | Peptidyl-prolyl cis-trans isomerase B                                                                 |
| 23349 | dirMS_041712_NAR_60mM_minus.16715.16715.3   | 4.23 | 1.842E-04             | (K)KYDAPU(K)Y D A/P/L/A/S E S I L(K)                   | 152.88 | 495.6052 | 1484.2   | 0.0015   | -1    | 6.07 | 25002    | 10.06 | HUMAN | Pe2906 60S ribosomal protein L10a                                                                     |
| 23350 | dirMS_041712_NAR_60mM_minus.17110.17110.2   | 4.23 | 1.145E-04 S1915       | (R)KIVDQ(R)K V I D Q/Q F L S A/P K(T)                  | 127.68 | 545.9127 | 1624.741 | 15.9757  | -11.7 | 5.93 | 23799.1  | 9.48  | HUMAN | MIRG/MIRFLN-binding protein 50                                                                        |
| 23351 | dirMS_041712_NAR_60mM_minus.9548.9548.3     | 4.23 | 1.487E-05             | (K)ITAFCE(K)T A F V C/D P P R G K(M)                   | 112.42 | 442.9098 | 1326.72  | -0.005   | -3.8  | 8.41 | 50199.4  | 4.75  | HUMAN | ANEN22 Tubulin beta-chain-like protein LOC20334                                                       |
| 23352 | dirMS_041712_NAR_120mM_plus.12304.12304.4   | 4.23 | 1.245E-06             | (K)JTLTTLV(K)K L T V T T Q/G A/D D V Q/K K(L)          | 115.95 | 449.7412 | 1795.944 | -0.0006  | -0.4  | 5.71 | 13778.5  | 7.96  | HUMAN | Eukaryotic translation initiation factor 1                                                            |
| 23353 | dirMS_041712_NAR_120mM_plus.7274.7274.2     | 4.23 | 1.477E-05             | (K)SLSDEE(K)E M S/E M/V/K Q Q I(E)                     | 148.18 | 623.3059 | 1263.6   | 0.0047   | -3.8  | 4.68 | 26419.2  | 5.1   | HUMAN | Splicing factor, proline- and glutamine-rich (Fragment)                                               |
| 23354 | dirMS_041712_NAR_20mM_plus.10825.10825.2    | 4.23 | 0.538E-05             | (R)ASPEP(R)A S P E P E R A(L)                          | 80.48  | 457.2361 | 985.417  | -0.0064  | -6.6  | 6.04 | 60773.3  | 5.87  | HUMAN | V-type proton ATPase catalytic subunit A                                                              |
| 23355 | dirMS_041712_NAR_30mM_plus.8468.8468.2      | 4.23 | 0.513E-05             | (R)FISFLET(R)F I S E L T A K(L)                        | 98.87  | 462.7408 | 924.467  | 0.007    | -7.6  | 4.53 | 49982    | 5.86  | HUMAN | T-complex protein 1 subunit epsilon                                                                   |
| 23356 | dirMS_041712_NAR_40mM_plus.25907.25907.2    | 4.23 | 0.571E-03             | (R)FVGSSG(R)F G G S/G S/Q V S A R(M)                   | 92.85  | 584.273  | 1167.539 | -0.0002  | -10.1 | 5.84 | 86346.5  | 5.05  | HUMAN | E7W34 26S proteasome non-ATPase regulatory subunit 2                                                  |
| 23357 | dirMS_041712_NAR_50mM_plus.12492.12492.3    | 4.23 | 2.158E-04             | (R)RNSVDL(R)N V/E R/D L V Q/K L V(L)                   | 133.18 | 431.2516 | 1291.737 | 0.0034   | -2.6  | 8.5  | 86967.8  | 6.57  | HUMAN | OHCE7 E3 ubiquitin-protein ligase SUMF1F                                                              |
| 23358 | dirMS_041712_NAR_50mM_plus.11912.11912.3    | 4.23 | 0.398E-04             | (R)NYSVL(R)N S/M L/N/Q/A A H E L E Q Q S R(L)          | 119.55 | 584.9576 | 1752.862 | -0.0041  | -2.3  | 5.4  | 61316.9  | 5.83  | HUMAN | Prelamin-A/C                                                                                          |
| 23359 | dirMS_041712_NAR_60mM_plus.13955.13955.3    | 4.23 | 1.556E-06             | (K)LQAGQ(K)K L Q A/G L W G V M S P(R)                  | 129.07 | 520.266  | 1526.769 | -0.002   | -11.3 | 9.75 | 4210.4   | 7.04  | HUMAN | Alpha-endoxase                                                                                        |
| 23360 | dirMS_041712_NAR_60mM_plus.15677.15677.3    | 4.23 | 0.413E-04             | (R)WVYVYS(R)W V I V Y S/D J G T H A K(T)               | 138.42 | 534.9464 | 1602.828 | -0.0028  | -1.8  | 6.71 | 63374.2  | 8.64  | HUMAN | Glucose-6-phosphate isomerase                                                                         |
| 23361 | dirMS_041712_NAR_60mM_plus.21134.21134.3    | 4.23 | 0.167E-05             | (R)KNGGLG(K)N G L G H M N A/L/D S/L D L T K(L)         | 174.03 | 585.3126 | 1753.927 | -0.0033  | -1.9  | 6.74 | 26123.4  | 7.07  | HUMAN | Thioredoxin-dependent peroxide reductase, mitochondrial                                               |
| 23362 | dirMS_041712_NAR_120mM_minus.8201.8201.3    | 4.23 | 2.108E-06             | (K)KIGAAVE(K)K G A V A E D G D E L R V E F A K(K)      | 99.27  | 638.9698 | 1914.94  | -0.0041  | -2.1  | 4.36 | 19284.3  | 5.23  | HUMAN | GV3C7 DNA-synaptic or asynaptic site) lyase (Fragment)                                                |
| 23363 | dirMS_041712_NAR_30mM_minus.5180.5180.2     | 4.23 | 0.122E-01             | (R)AAAGQ(R)A A G A Q G L F L A P K(T)                  | 81.23  | 442.621  | 907.451  | 15.9757  | -11.7 | 6.04 | 26123.4  | 7.07  | HUMAN | Fatty acid synthase                                                                                   |
| 23364 | dirMS_041712_NAR_30mM_minus.5506.5506.2     | 4.22 | 1.100E-05             | (R)KIGAE(R)R I D Q E Y E T K(L)                        | 84.65  | 462.7203 | 924.431  | 0.0024   | -2.6  | 4.14 | 65692.2  | 5.7   | HUMAN | E7W34 Eryin                                                                                           |
| 23365 | dirMS_041712_NAR_30mM_minus.6481.6481.2     | 4.22 | 0.232E-05             | (R)IQQVYS(R)Q Q V S/A W A/K(N)                         | 89.95  | 512.4504 | 1023.511 | -0.011   | -10.8 | 6    | 49709.6  | 5.19  | HUMAN | BOYCA Vimentin                                                                                        |
| 23366 | dirMS_041712_NAR_30mM_minus.7304.7304.2     | 4.22 | 1.414E-04 M278M       | (K)NIGRM(K)N E/G R/M A/E K(L)                          | 94.23  | 533.2399 | 1049.468 | 16.0045  | -9.9  | 4.68 | 10230.7  | 4.66  | HUMAN | E7LUI23 Zinc finger protein 638                                                                       |
| 23367 | dirMS_041712_NAR_30mM_minus.14897.14897.3   | 4.22 | 1.048E-05             | (K)FLFPHS(K)F L F H T S L P V L A P G K(L)             | 173.92 | 588.9924 | 1740.968 | -0.0057  | -13.3 | 6.75 | 108155.4 | 6.57  | HUMAN | Protein transport protein Sec24C                                                                      |
| 23368 | dirMS_041712_NAR_50mM_minus.10434.10434.3   | 4.22 | 0.723E-04             | (R)ILTSVPS(R)I L T S/P/L V S/T L D L T R(N)            | 127.37 | 480.6    | 1439.785 | 0.0002   | -0.1  | 6.74 | 58760.2  | 5.26  | HUMAN | GV276 Ankryin repeat domain-containing protein 13D                                                    |
| 23369 | dirMS_041712_NAR_50mM_minus.11125.11125.3   | 4.22 | 0.411E-05             | (R)DPLSPG(R)D L P S P G A E E I L S/E S/P F R(A)       | 130.8  | 623.9684 | 1869.908 | -0.017   | -9.1  | 3.8  | 81886.4  | 6.72  | HUMAN | Translation initiation factor IF-2, mitochondrial                                                     |
| 23370 | dirMS_041712_NAR_50mM_minus.14797.14797.3   | 4.22 | 1.280E-05             | (K)NIVYVL(K)N I/V/V/L Q L E D N P G A K(R)             | 152.6  | 577.3116 | 1729.323 | -0.0029  | -1.7  | 6.07 | 64302.5  | 6.4   | HUMAN | ELIAC7 X-ray repair complementing defective repair in Chinese hamster cells 6 (Ku autoantigen, 70kDa) |
| 23371 | dirMS_041712_NAR_50mM_minus.17128.17128.3   | 4.22 | 1.123E-05             | (R)KHNLEL(R)N H M L/E L T M N/Q/A A H E L E Q Q S R(L) | 108.85 | 626.6531 | 1877.936 | 0.0027   | -4.6  | 8.61 | 75011.4  | 8.74  | HUMAN | Uncharacterized protein Clor240                                                                       |
| 23372 | dirMS_041712_NAR_60mM_minus.12828.12828.3   | 4.22 | 0.312E-05             | (R)HEDGVR(R)E D G V R L G V L P R(R)                   | 127.68 | 445.9127 | 1624.741 | 15.9757  | -11.7 | 5.93 | 23799.1  | 9.48  | HUMAN | N-alpha-acetyltransferase 5                                                                           |
| 23373 | dirMS_041712_NAR_60mM_minus.12677.12677.3   | 4.22 | 1.129E-05             | (R)RITSDV(R)R I T S/D V K E L V/L/D S R(S)             | 131.18 | 524.9451 | 1572.823 | -0.002   | -1.3  | 4.55 | 20111    | 4.47  | HUMAN | HOYN26 Acidic leucine-rich nuclear phosphoprotein 32 family member A                                  |
| 23374 | dirMS_041712_NAR_60mM_minus.15293.15293.3   | 4.22 | 1.183E-05 N183M       | (R)KIVDFA(R)R V R I K/E A/P A/E G T E K(L)             | 145.4  | 520.6074 | 1356.723 | 203.0846 | -3.4  | 8.56 | 60836.6  | 9.59  | HUMAN | Tubby-related protein 2                                                                               |
| 23375 | dirMS_041712_NAR_60mM_minus.17251.17251.3   | 4.22 | 1.112E-05             | (K)RILSPD(K)F L I S/P G D W F L A/R N(R)               | 156.22 | 517.9425 | 1551.817 | -0.0038  | -2.3  | 6.07 | 97622    | 8.94  | HUMAN | GN9726 RNA-binding protein 12                                                                         |
| 23376 | dirMS_041712_NAR_60mM_minus.18423.18423.3   | 4.22 | 1.122E-04             | (K)KAGQSK(K)K A G I Q F L S A/P K(T)                   | 154.16 | 515.964  | 1544.882 | -0.0026  | -1.7  | 10   | 12755    | 8.17  | HUMAN | T-complex protein 1 subunit delta                                                                     |

|       |                                           |    |      |   |          |                                                   |                        |        |          |          |         |       |      |          |             |                           |                                                                     |
|-------|-------------------------------------------|----|------|---|----------|---------------------------------------------------|------------------------|--------|----------|----------|---------|-------|------|----------|-------------|---------------------------|---------------------------------------------------------------------|
| 23431 | dirMS_041712_NAR_120mM_plus.4559.4559.3   | 3  | 4.19 | 0 | 2.15E+05 | M77m(R)RLTMSM(R)LT N S m n/m(G H R)               | m.DnaE2 methionine     | 73.05  | 403.8446 | 1177.527 | 31.9198 | 1.6   | 9.75 | 23047.2  | 9.05 HUMAN  | P46782                    | 40S ribosomal protein S5                                            |
| 23432 | dirMS_041712_NAR_20mM_plus.13777.13777.2  | 2  | 4.19 | 0 | 1.24E+05 | M255m(R)SDmDm(R) L m/Dm/Dm(V)A/E V(K/A)           | m.DnaE2 methionine     | 167.72 | 666.8371 | 1320.671 | 15.9954 | 0.3   | 4.03 | 37296.3  | 5.3 HUMAN   | F8V064                    | Keratin, type I cytoskeletal 8                                      |
| 23433 | dirMS_041712_NAR_40mM_plus.15992.15992.2  | 2  | 4.19 | 0 | 3.94E+05 | (K)MDOA(K)M DQ/Dm(V)G                             | C.Carbamidomethylation | 167.72 | 666.8371 | 1320.671 | 15.9954 | 0.3   | 4.03 | 37296.3  | 5.3 HUMAN   | F8V064                    | Keratin, type I cytoskeletal 8                                      |
| 23434 | dirMS_041712_NAR_30mM_plus.21927.21927.2  | 2  | 4.19 | 0 | 2.15E+05 | (R)JSLDM(K)A L/E/LM/V A/S L(K)G                   | m.DnaE2 methionine     | 170.23 | 558.2024 | 1131.644 | -0.0104 | -9.4  | 6.05 | 40821.3  | 7.79 HUMAN  | OY9167                    | Phosphoserine aminotransferase                                      |
| 23435 | dirMS_041712_NAR_40mM_plus2.11657.11657.2 | 2  | 4.19 | 0 | 7.03E+04 | (K)JAWL(S)(K)A/W/L A/S R(K)                       | m.DnaE2 methionine     | 134.97 | 408.7393 | 816.473  | -0.0013 | -1.6  | 9.75 | 21005.6  | 5.12 HUMAN  | OQ4760                    | Lactylglutathione lyase                                             |
| 23436 | dirMS_041712_NAR_40mM_plus.6336.6336.2    | 2  | 4.19 | 0 | 3.01E+04 | (R)IDGQ(V)R(K)G/D/V/Q/Q/FWR                       | m.DnaE2 methionine     | 137.97 | 500.2303 | 999.453  | 0.0003  | 0.3   | 5.83 | 70523.3  | 4.94 HUMAN  | GV3153                    | Capsin-1                                                            |
| 23437 | dirMS_041712_NAR_40mM_plus.8515.8515.2    | 2  | 4.19 | 0 | 1.09E+05 | (K)YFQSG(K)R(V)D/F/S/R                            | m.DnaE2 methionine     | 115.03 | 474.7307 | 942.446  | 0.0068  | 0.6   | 6.75 | 20557.3  | 4.24 HUMAN  | PF9360                    | Heat shock protein HSP 90-alpha                                     |
| 23438 | dirMS_041712_NAR_50mM_plus2.10146.10146.3 | 3  | 4.19 | 0 | 3.78E+05 | (R)NIVQW(R)W/Q/V/H/E/D/S E/G S(K)G                | C.Carbamidomethylation | 121.16 | 539.5992 | 1616.777 | 0.006   | 3.7   | 5.38 | 87447.6  | 6.44 HUMAN  | Q15437                    | Protein transport protein Sec23B                                    |
| 23439 | dirMS_041712_NAR_50mM_plus2.10219.10219.3 | 3  | 4.19 | 1 | 1.28E+05 | (K)JATAVQ(K)A T/J A V/L/D S/E A K F E V L(K)      | m.DnaE2 methionine     | 121.17 | 445.5822 | 1334.731 | 0.0006  | 0.5   | 6.11 | 15252.2  | 5.82 HUMAN  | AN61W5                    | Peroxiredoxin 2, isoform CRA_a                                      |
| 23440 | dirMS_041712_NAR_50mM_plus2.12015.12015.3 | 3  | 4.19 | 1 | 4.97E+05 | (R)KNDQA(R)D N K Q A(G)W/F/E/T V I K(V)           | m.DnaE2 methionine     | 131.35 | 515.9483 | 1545.827 | 0.0032  | 2.1   | 6.07 | 44227.3  | 7.81 HUMAN  | ET608E                    | T-complex protein 1 subunit alpha                                   |
| 23441 | dirMS_041712_NAR_50mM_plus2.21044.21044.3 | 3  | 4.19 | 0 | 3.66E+05 | (R)HSDQ(R)K(S) G F T(V)G/V/L P F V(K)E            | m.DnaE2 methionine     | 179.9  | 593.6536 | 1778.948 | -0.0013 | -0.8  | 6.75 | 20151.2  | 4.58 HUMAN  | GV3238                    | Heat shock protein HSP 90-alpha (Fragment)                          |
| 23442 | dirMS_041712_NAR_50mM_plus2.8624.8624.3   | 3  | 4.19 | 0 | 7.71E+05 | (R)IDNQG(R)S M Q/G/L M/V G T R(K)                 | m.DnaE2 methionine     | 117.22 | 440.598  | 1325.75  | 0.0025  | 1.9   | 8.75 | 11807.1  | 11.8 HUMAN  | Q15437                    | Phosphoserine aminotransferase                                      |
| 23443 | dirMS_041712_NAR_60mM_plus.11410.11410.2  | 2  | 4.19 | 0 | 8.24E+05 | (R)TICSHV(R)T/T/S C/H/V/D N M V(K)G               | C.Carbamidomethylation | 117.02 | 665.8295 | 1330.661 | -0.0089 | -6.8  | 8.44 | 20931.1  | 10.28 HUMAN | DR6ANA                    | 60S ribosomal protein L9 (Fragment)                                 |
| 23444 | dirMS_041712_NAR_60mM_plus.16953.16953.3  | 3  | 4.19 | 1 | 2.53E+05 | (K)KJAI(P)Q(K)K A L P/V(Q)Q/Q/V Y(K)S             | m.DnaE2 methionine     | 145.68 | 467.2842 | 1399.842 | -0.0039 | -2.8  | 9.99 | 25891.4  | 10.67 HUMAN | F8W181                    | 60S ribosomal protein L6 (Fragment)                                 |
| 23445 | dirMS_041712_NAR_60mM_plus.17343.17343.3  | 3  | 4.19 | 2 | 1.98E+06 | M348m(K)K(V)K(K)K(V)G W L P E M F(H)              | m.DnaE2 methionine     | 146.63 | 438.5872 | 1297.734 | 16.0134 | 14    | 8.59 | 39066    | 6.61 HUMAN  | ADP7W9                    | Selenium binding protein 1 (Fragment)                               |
| 23446 | dirMS_041712_NAR_60mM_plus.21206.21206.3  | 3  | 4.19 | 1 | 4.02E+05 | (R)KAVFP(R)K A I I I F V I V P Q Q(K)S            | m.DnaE2 methionine     | 174.23 | 483.057  | 1465.95  | -0.0035 | -2.4  | 10   | 21111.5  | 10.28 HUMAN | 85MCP9                    | 40S ribosomal protein S7                                            |
| 23447 | dirMS_041712_NAR_60mM_plus.5254.5254.3    | 3  | 4.19 | 1 | 1.86E+06 | M163m(K)K(Y)E(D)S D/D M K R(T)                    | m.DnaE2 methionine     | 85.13  | 458.1946 | 1356.574 | 15.9956 | 0.5   | 4.03 | 21341.9  | 7.77 HUMAN  | OSK370                    | Capsin binding protein                                              |
| 23448 | dirMS_041712_NAR_120mM_plus.20196.20196.3 | 3  | 4.18 | 0 | 3.87E+05 | (K)NVLHG(V)K(V)H/LV/D G/D I/P F(K)K               | m.DnaE2 methionine     | 166.43 | 433.5866 | 1298.747 | -0.0015 | -1.1  | 6.71 | 13048.7  | 6.42 HUMAN  | C9J4V5                    | Eukaryotic translation initiation factor 5A-2 (Fragment)            |
| 23449 | dirMS_041712_NAR_120mM_plus.13174.13174.2 | 2  | 4.18 | 0 | 2.77E+05 | M355m(K)NDIANE(K)D N I A/I N I E M L R(K)         | m.DnaE2 methionine     | 182.05 | 588.7948 | 1160.598 | 15.9843 | -9    | 4.7  | 23084.7  | 7.11 HUMAN  | BD4X8                     | 26S proteasome non-ATPase regulatory subunit 7 (Fragment)           |
| 23450 | dirMS_041712_NAR_20mM_plus.8291.8291.2    | 2  | 4.18 | 0 | 4.07E+04 | (K)SDVGD(K)M S V/V/G/D E A D Q(S)R                | m.DnaE2 methionine     | 104.83 | 599.7642 | 1198.522 | -0.0011 | -0.9  | 4.03 | 32616.5  | 5.18 HUMAN  | AN61T6                    | Actin, alpha skeletal muscle                                        |
| 23451 | dirMS_041712_NAR_30mM_plus2.11189.11189.2 | 2  | 4.18 | 0 | 1.23E+05 | (K)KCNKL(K)S C/N/C L L L(K)K                      | C.Carbamidomethylation | 114.5  | 504.2543 | 1007.501 | 0.0001  | 0.1   | 8.47 | 47510.4  | 7.04 HUMAN  | PG6733                    | Alpha-enolase                                                       |
| 23452 | dirMS_041712_NAR_30mM_plus2.15778.15778.2 | 2  | 4.18 | 0 | 2.77E+05 | (R)LTGSM(R) L T/G/G N L S I R(K)                  | m.DnaE2 methionine     | 139.28 | 537.313  | 1073.631 | -0.0126 | -11.7 | 9.75 | 83273.6  | 5.55 HUMAN  | P13010                    | X-ray repair cross-complementing protein 5                          |
| 23453 | dirMS_041712_NAR_30mM_plus2.5586.5586.2   | 2  | 4.18 | 0 | 8.90E+04 | (K)SDVGD(K)M S V/V/G/D E A Q(S)R                  | m.DnaE2 methionine     | 84.18  | 599.7632 | 1198.522 | -0.0031 | -2.6  | 4.03 | 32616.5  | 5.18 HUMAN  | AN61T6                    | Actin, alpha skeletal muscle                                        |
| 23454 | dirMS_041712_NAR_30mM_plus2.6193.6193.2   | 2  | 4.18 | 0 | 1.20E+05 | (K)MAGAN(K)M I/G/V/M S T A T(K)                   | m.DnaE2 methionine     | 87.82  | 484.7299 | 968.454  | -0.0014 | -1.5  | 8.5  | 23983.2  | 8.9 HUMAN   | QJQJN3                    | Charged multivesicular body protein 2b                              |
| 23455 | dirMS_041712_NAR_40mM_plus2.14691.14691.3 | 3  | 4.18 | 0 | 4.48E+04 | (K)KIQAV(K)K I Q/A V V V V T R L P A/G/G T(K)K    | m.DnaE2 methionine     | 166.73 | 595.3273 | 1675.974 | 0.0068  | 4     | 6.75 | 16120    | 6.05 HUMAN  | C9QVQ2                    | Calcium-regulated heat stable protein 1                             |
| 23456 | dirMS_041712_NAR_50mM_plus2.4961.4961.3   | 3  | 4.18 | 1 | 2.84E+05 | M137m(R)NMQD(T)R(N)Q/D T A/E/E N T T E K E(K)S    | m.DnaE2 methionine     | 83     | 638.2738 | 1896.813 | 15.9941 | 0.4   | 4.14 | 54214.9  | 5.66 HUMAN  | CJ8183                    | Caldesmon (Fragment)                                                |
| 23457 | dirMS_041712_NAR_50mM_plus2.5797.5797.3   | 3  | 4.18 | 1 | 4.10E+04 | (R)IATEG(R)A/T/E/G M V V/D M K C S(K)K            | C.Carbamidomethylation | 94.57  | 503.9058 | 1509.704 | -0.0007 | -0.5  | 6.11 | 15607.8  | 9.99 HUMAN  | BAE0P1                    | Proteasome (Prosome, macropain) subunit, beta type 7, isoform CRA_B |
| 23458 | dirMS_041712_NAR_50mM_plus2.9185.9185.3   | 3  | 4.18 | 2 | 4.09E+04 | (K)YRMAE(K)S R/L M S E/A/E K T R(K)               | m.DnaE2 methionine     | 120.33 | 450.5813 | 1349.721 | 0.0088  | 6.5   | 8.46 | 281207.5 | 4.95 HUMAN  | PD2549                    | Spectrin alpha chain, erythrocytic 1                                |
| 23459 | dirMS_041712_NAR_60mM_plus.14802.14802.3  | 3  | 4.18 | 1 | 5.91E+05 | (R)KJATQ(R)K H E H A/L/D S I T G V(K)G            | m.DnaE2 methionine     | 142.57 | 491.9179 | 1475.711 | 0.0018  | 0.8   | 4.75 | 11414.4  | 6.1         | Profilin 1, isoform CRA_A |                                                                     |
| 23460 | dirMS_041712_NAR_60mM_plus.8796.8796.3    | 3  | 4.18 | 1 | 1.14E+05 | (K)YRMAE(K)S R/L M S E/A/E K T R(K)               | m.DnaE2 methionine     | 109.12 | 493.1262 | 1479.711 | 0.0118  | 8     | 8.38 | 11854.4  | 6.97 HUMAN  | P13149                    | Protein S100-A11                                                    |
| 23461 | dirMS_041712_NAR_120mM_plus.10686.10686.3 | 3  | 4.18 | 1 | 1.83E+05 | (R)YKVEY(R)K Y E T E/L A/M R(K)                   | m.DnaE2 methionine     | 109.23 | 413.8849 | 1239.64  | 0.01    | 8.1   | 4.37 | 43773.3  | 5.26 HUMAN  | F8W293                    | Keratin, type I cytoskeletal 18                                     |
| 23462 | dirMS_041712_NAR_120mM_plus.10849.10849.3 | 3  | 4.18 | 0 | 2.01E+05 | (K)ILEAN(K)K L E A N M/D V I N Y(K)D              | m.DnaE2 methionine     | 109.42 | 436.8969 | 1308.687 | -0.0107 | -0.1  | 4.37 | 40035.7  | 9.98 HUMAN  | Q9K4C8                    | Mitochondrial calcium uniporter regulator 1                         |
| 23463 | dirMS_041712_NAR_20mM_plus.1114.1114.12   | 12 | 4.18 | 0 | 3.48E+05 | (K)UTLQ(R)K H E H A/L/D S I T G V(K)G             | m.DnaE2 methionine     | 151.05 | 542.8186 | 1608.636 | -0.0023 | -5.7  | 6.1  | 17398.4  | 6.25 HUMAN  | Q13175                    | 40S ribosomal protein S25                                           |
| 23464 | dirMS_041712_NAR_20mM_plus.8559.8559.2    | 2  | 4.18 | 0 | 3.02E+05 | (R)KVEIP(R)R V E I P Q/P M F R(K)                 | m.DnaE2 methionine     | 128.45 | 567.7865 | 1134.561 | 0.0045  | 4     | 4.37 | 120222.5 | 9.83 HUMAN  | Q9NS56                    | E3 ubiquitin-protein ligase Topors                                  |
| 23465 | dirMS_041712_NAR_30mM_plus2.4335.4335.2   | 2  | 4.18 | 0 | 2.49E+05 | (R)ISMPEP(R)S M I P E T G T E G E(K)              | m.DnaE2 methionine     | 71.63  | 503.7289 | 1006.451 | -0.0005 | -0.5  | 4.53 | 12955    | 9.87 HUMAN  | PG2888                    | 60S ribosomal protein L30                                           |
| 23466 | dirMS_041712_NAR_30mM_plus2.5550.5551.2   | 2  | 4.18 | 0 | 5.19E+04 | (R)IJDDEE(R)R/LQ/D/E Y E(K)T                      | m.DnaE2 methionine     | 83.17  | 462.7168 | 924.431  | -0.0046 | -5    | 4.14 | 65692.2  | 5.7 HUMAN   | ET608E                    | Ezrin                                                               |
| 23467 | dirMS_041712_NAR_30mM_plus2.6732.6732.2   | 2  | 4.18 | 0 | 2.48E+05 | (K)JADDEE(K)M/L/D/E/M T S N(K)G                   | m.DnaE2 methionine     | 90.07  | 418.1994 | 835.387  | 0.0049  | 5.9   | 4.14 | 58656.7  | 6.26 HUMAN  | GBW0X1                    | Paraspeckle component 1                                             |
| 23468 | dirMS_041712_NAR_30mM_plus2.7183.7183.2   | 2  | 4.18 | 0 | 1.58E+05 | (K)TSGE(R)K H E H A/L/D S I T G V(K)G             | m.DnaE2 methionine     | 92.13  | 401.9573 | 801.378  | 0.0068  | 1.2   | 5.66 | 35407.1  | 6.97 HUMAN  | EP9118                    | Hydroxyacyl-coenzyme A dehydrogenase, mitochondrial                 |
| 23469 | dirMS_041712_NAR_40mM_plus2.6511.6511.2   | 2  | 4.18 | 0 | 1.10E+05 | (K)YCVQR(K)K(Y)C/Q I R V(R)                       | m.DnaE2 methionine     | 98.08  | 419.7152 | 838.424  | -0.0009 | -1    | 8.75 | 31471    | 10.11 HUMAN | 85MVC2                    | 60S ribosomal protein L3 (Fragment)                                 |
| 23470 | dirMS_041712_NAR_50mM_plus2.16346.16346.3 | 3  | 4.18 | 0 | 3.28E+04 | (-)KTEPSSP(-)K E I T S S P Q G I/D M P A L L(R)D  | m.DnaE2 methionine     | 154.37 | 608.6724 | 1823.986 | 0.0165  | 9     | 4.37 | 11963.3  | 4.8 HUMAN   | HY9190                    | Protein DOI1 homolog 2 (Fragment)                                   |
| 23471 | dirMS_041712_NAR_50mM_plus2.8652.8652.3   | 3  | 4.18 | 0 | 4.30E+05 | (R)JUALHS(R)A A L A H S E/V/T A/V/S/V A A A T(K)T | m.DnaE2 methionine     | 112.93 | 595.312  | 1783.919 | 0.003   | 1.7   | 5.4  | 23903    | 4.94 HUMAN  | HY01N1                    | Plectin (Fragment)                                                  |
| 23472 | dirMS_041712_NAR_50mM_plus2.1198.1198.3   | 3  | 4.17 | 1 | 1.16E+05 | (K)KJATQ(R)K H E H A/L/D S I T G V(K)G            | m.DnaE2 methionine     | 120.11 | 488.156  | 1544.931 | 0.0011  | 0.7   | 6.14 | 31719    | 6.12 HUMAN  | PF1919                    | Plectin                                                             |
| 23473 | dirMS_041712_NAR_120mM_plus.13198.13198.4 | 4  | 4.17 | 1 | 5.13E+05 | (R)MAGAN(K)M I/G/V/M S T A T(K)                   | m.DnaE2 methionine     | 126.43 | 465.7525 | 1863.992 | -0.0041 | -2.2  | 6.47 | 54427.4  | 5.96 HUMAN  | KAD0D9                    | Actin-CoA carboxylase 1                                             |
| 23474 | dirMS_041712_NAR_120mM_plus.14922.14922.4 | 4  | 4.17 | 1 | 3.27E+05 | (K)MDOA(K)K L D K A Q I H D L V U V/G/G S T(R)I   | m.DnaE2 methionine     | 135.53 | 456.2581 | 1822.018 | -0.0006 | -0.4  | 6.75 | 60126.2  | 5.44 HUMAN  | Q9K4C8                    | Heat shock 70 kDa protein 1A/1B                                     |
| 23475 | dirMS_041712_NAR_120mM_plus.5841.5841.2   | 2  | 4.17 | 1 | 1.01E+05 | (K)MIPDK(K)M L I P D/K I C Y(R)K                  | C.Carbamidomethylation | 85.58  | 517.7407 | 1034.476 | -0.0001 | -1.6  | 5.71 | 22956    | 8.8 HUMAN   | EP9K25                    | Coilin-1                                                            |
| 23476 | dirMS_041712_NAR_20mM_plus.10311.10311.2  | 2  | 4.17 | 0 | 4.90E+04 | (K)JIDGQ(V)R(K)G/D/V/Q/Q/FWR                      | m.DnaE2 methionine     | 152.72 | 648.8694 | 1298.731 | 0.0001  | 0.1   | 4.37 | 57391.2  | 6.29 HUMAN  | Q14375                    | D-3-phosphoglycerate dehydrogenase                                  |
| 23477 | dirMS_041712_NAR_20mM_plus2.7020.7020.2   | 2  | 4.17 | 0 | 2.07E+05 | M333m(R)SDmDm(R) L m/Dm/Dm(V)A/E V(K/A)           | m.DnaE2 methionine     | 117.95 | 555.7733 | 1102.545 | 15.9944 | 0.4   | 4.14 | 26001.9  | 4.47 HUMAN  | PS1858                    | Hepatoma-derived growth factor                                      |
| 23478 | dirMS_041712_NAR_30mM_plus2.13708.13708.2 | 2  | 4.17 | 0 | 7.04E+04 | (K)SSJGSG(K)S S/L/G S M L C(K)K                   | m.DnaE2 methionine     | 127.77 | 555.7685 | 1110.528 | 0.0015  | 1.4   | 8.47 | 16787.5  | 4.8 HUMAN   | Q9NRD8                    | Dual oxidase 2                                                      |
| 23479 | dirMS_041712_NAR_30mM_plus2.16266.16266.2 | 2  | 4.17 | 0 | 1.09E+05 | (K)GQVFAF(K)R G V/V/I F A/G A Q(K)K               | m.DnaE2 methionine     | 141.95 | 519.2901 | 1037.578 | -0.0049 | -4.7  | 8.75 | 40813.3  | 7.          |                           |                                                                     |

|       |                                           |   |      |           |                                                      |        |          |          |          |       |      |          |           |       |        |                                                              |                     |
|-------|-------------------------------------------|---|------|-----------|------------------------------------------------------|--------|----------|----------|----------|-------|------|----------|-----------|-------|--------|--------------------------------------------------------------|---------------------|
| 23540 | dirMS_041712_NAR_30mM_plus1.18490.18490.2 | 2 | 4.15 | 0.806E+05 | (KIQILQLQ(K)Q(L)U(L)Q(V)Q(K)RT)                      | 150.85 | 627.3688 | 1251.732 | -0.0021  | -1.7  | 9.75 | 67181.8  | 5.96      | HUMAN | Q56I83 | Hypermethylated in cancer 2 protein                          |                     |
| 23541 | dirMS_041712_NAR_30mM_plus2.0426.20426.2  | 2 | 4.15 | 0.238E+04 | (RTVYGLS(R)T)V(Q)S(L)E(D)I(D)S(M)R(N)                | 161.05 | 751.8788 | 1506.747 | -0.0005  | -0.3  | 4.03 | 43773.3  | 5.26      | HUMAN | FRB729 | Keratin, type I cytoskeletal 18                              |                     |
| 23542 | dirMS_041712_NAR_30mM_plus2.1452.21452.2  | 2 | 4.15 | 0.524E+05 | (K6STLNTL)K(S)Y(L)M(V)S(L)K(L)K(L)K(L)               | 161.05 | 671.8788 | 1506.747 | -0.0113  | -0.3  | 12.5 | 8.47     | 1801.0364 | 6.61  | HUMAN  | CTSL64                                                       | Sectin-9 (Fragment) |
| 23543 | dirMS_041712_NAR_30mM_plus2.9435.9435.2   | 2 | 4.15 | 0.435E+05 | (KJAT26S(K)A)T(A)D(A)S(T)K(L)                        | 103.23 | 426.7266 | 852.446  | -0.0002  | -0.3  | 5.88 | 25399.9  | 10.49     | HUMAN | EP9007 | 40S ribosomal protein S2                                     |                     |
| 23544 | dirMS_041712_NAR_40mM_plus2.6157.6157.2   | 2 | 4.15 | 0.140E+04 | (R)NMGV(R)N(M)G(V)W(Q)K(R)K(L)                       | 95     | 498.2392 | 995.473  | -0.0016  | -1.6  | 5.75 | 28637.7  | 6.66      | HUMAN | BAD0M6 | Mitotic checkpoint protein BUB3                              |                     |
| 23545 | dirMS_041712_NAR_30mM_plus10.100.10100.2  | 2 | 4.15 | 0.203E+04 | (K)IGWFSE(K)I(V)E(F)S(K)P(A)A(R)K(L)                 | 111.3  | 616.3425 | 1231.679 | -0.0016  | -1.3  | 8.75 | 23729.5  | 9.89      | HUMAN | C9B27  | Non-POU domain-containing octamer-binding protein (Fragment) |                     |
| 23546 | dirMS_041712_NAR_40mM_plus11.886.11886.3  | 2 | 4.15 | 1.707E+05 | (S)HNSD(S)K(M)P(S)E(A)E(I)N(Y)I(L)K(E)               | 119.38 | 617.484  | 1235.807 | -0.0025  | -23.9 | 5.78 | 44879.3  | 9.02      | HUMAN | Q26337 | Plectin family homology domain-containing family member 2    |                     |
| 23547 | dirMS_041712_NAR_60mM_plus5.844.5844.3    | 3 | 4.15 | 0.132E+05 | M110m (K)ILHEH(K)K(Y)E(L)H(G)E(S)T(S)G(K)A(K)        | 88.53  | 449.8704 | 1331.620 | -0.1977  | -7.2  | 2.4  | 16650    | 9.47      | HUMAN | DSR8R6 | 40S ribosomal protein S3a                                    |                     |
| 23548 | dirMS_041712_NAR_120mM_minus6.808.6808.2  | 2 | 4.14 | 1.162E+05 | (K)QVVEY(K)Q(V)E(Y)K(G)T(K)K(L)                      | 91.35  | 590.8128 | 1180.621 | -0.0025  | -2.1  | 6.11 | 20069.4  | 6.74      | HUMAN | EPK54  | Heat shock cognate 71 kDa protein (Fragment)                 |                     |
| 23549 | dirMS_041712_NAR_30mM_minus12.300.12300.2 | 2 | 4.14 | 0.354E+05 | (K)IDSLSV(K)Q(I)S(L)A(Y)D(K)G(K)                     | 120.35 | 470.7357 | 940.462  | 0.0019   | 2     | 4.21 | 22388.2  | 8.65      | HUMAN | Q06830 | Peroxiredoxin-1                                              |                     |
| 23550 | dirMS_041712_NAR_30mM_minus12.366.12366.2 | 2 | 4.14 | 0.920E+04 | (K)IDSLV(K)K(Y)A(S)W(G)Y(R)H(K)                      | 121.55 | 464.7493 | 928.489  | 0.0020   | 2.8   | 8.59 | 36914.7  | 6.33      | HUMAN | PI4550 | Alcohol dehydrogenase [NADP+]-L                              |                     |
| 23551 | dirMS_041712_NAR_30mM_minus12.356.12356.2 | 2 | 4.14 | 0.544E+05 | M405m (K)IDSLV(K)K(Y)A(S)W(G)Y(R)H(K)                | 122.48 | 464.7493 | 928.489  | 0.0021   | 2.1   | 5.83 | 36914.6  | 6.24      | HUMAN | PI4550 | Alcohol dehydrogenase [NADP+]-L                              |                     |
| 23552 | dirMS_041712_NAR_30mM_minus1.6191.6191.2  | 2 | 4.14 | 0.284E+05 | (K)YTSYK(K)Y(S)T(L)E(V)N(C)Y(R)K                     | 88     | 514.726  | 1028.447 | -0.0018  | -1.8  | 5.66 | 18946.7  | 9.13      | HUMAN | 84D1P7 | Cellular nucleic acid-binding protein                        |                     |
| 23553 | dirMS_041712_NAR_30mM_minus7.258.7258.2   | 2 | 4.14 | 0.118E+05 | (K)IMQAV(K)M(Q)A)W(L)E(A)R(L)                        | 94     | 517.257  | 1033.509 | -0.0028  | -2.7  | 5.75 | 53377.8  | 5.74      | HUMAN | Q15149 | Plectin                                                      |                     |
| 23554 | dirMS_041712_NAR_40mM_minus2.8281.8281.3  | 3 | 4.14 | 1.445E+04 | (R)VGGLQ(K)G(V)Q(V)Q(V)P(D)E(I)Y(K)K(L)              | 129.47 | 540.9825 | 1260.932 | 0.001    | 0.6   | 6.04 | 112066.5 | 5.59      | HUMAN | BJA027 | Ankyrin 3, node of Ranvier (Ankyrin G)                       |                     |
| 23555 | dirMS_041712_NAR_50mM_minus1.2804.12804.3 | 3 | 4.14 | 0.189E+05 | (R)LVVGL(R)Y(V)W(V)Q(L)K(P)G(K)M(K)                  | 140.37 | 470.824  | 1410.865 | -0.123   | -8.7  | 10   | 59484.7  | 6.61      | HUMAN | PS4577 | Tyrosine-tRNA ligase, cytoplasmic                            |                     |
| 23556 | dirMS_041712_NAR_50mM_minus2.9580.9580.3  | 3 | 4.14 | 0.243E+05 | (K)YTSYK(K)Y(S)T(L)E(V)N(C)Y(R)K                     | 123.15 | 431.9205 | 1295.572 | -0.0049  | -3.8  | 5.73 | 17178.3  | 5.63      | HUMAN | C9Z79  | Programmed cell death 6-interacting protein (Fragment)       |                     |
| 23557 | dirMS_041712_NAR_60mM_minus1.0818.10818.3 | 3 | 4.14 | 1.389E+05 | (K)ITAVDC(K)T(A)V(C)D(P)P(R)G(L)K(M)                 | 119.88 | 442.9098 | 1326.72  | -0.005   | -3.8  | 8.41 | 50199.4  | 5.75      | HUMAN | ANNZ22 | Tubulin beta-8 chain-like protein LOC260334                  |                     |
| 23558 | dirMS_041712_NAR_120mM_plus5.632.5632.3   | 3 | 4.14 | 1.235E+05 | M1529m (K)IEMEP(K)K(E)M(P)P(S)H(H)I(L)K(L)           | 82.2   | 478.2139 | 1396.668 | 95.594   | -1.3  | 7.02 | 291233.6 | 4.75      | HUMAN | J3KM5  | Centrosomal protein of 290 kDa                               |                     |
| 23559 | dirMS_041712_NAR_120mM_plus9.941.9411.3   | 3 | 4.14 | 1.635E+05 | (R)RMGEK(R)R(M)G(E)S(D)S(L)U(L)R(K)                  | 103.37 | 426.8756 | 1278.611 | 0.0015   | 1.2   | 4.56 | 9225.3   | 9.16      | HUMAN | PS3220 | 40S ribosomal protein S21                                    |                     |
| 23560 | dirMS_041712_NAR_120mM_plus9.866.9866.4   | 4 | 4.14 | 1.356E+06 | (K)DTDKT(K)D(T)G(K)T(P)E(V)E(V)A(H)R(I)              | 104.8  | 412.9719 | 1648.865 | 0.0005   | 0.3   | 4.55 | 5429.1   | 9.6       | HUMAN | ESR1P1 | 40S ribosomal protein S20                                    |                     |
| 23561 | dirMS_041712_NAR_20mM_plus1.3795.13795.2  | 2 | 4.14 | 0.419E+04 | (K)YVLTN(P)K(V)I)LT(N)P(V)T(G)E(V)G(K)               | 167.07 | 779.9082 | 1558.815 | -0.0054  | -3.5  | 4.53 | 51679.1  | 9.11      | HUMAN | PA1091 | Eukaryotic translation initiation factor 2 subunit 3         |                     |
| 23562 | dirMS_041712_NAR_20mM_plus1.3844.13844.2  | 2 | 4.14 | 0.238E+05 | M98m (R)ILTVDI(R)T(L)T(V)D(T)G(M)T(K)A(K)            | 167.38 | 683.3671 | 1349.735 | 15.9924  | -1.8  | 5.55 | 20151.2  | 4.58      | HUMAN | GV32H  | Heat shock protein HSP 90-alpha (Fragment)                   |                     |
| 23563 | dirMS_041712_NAR_20mM_plus1.4596.14596.2  | 2 | 4.14 | 0.939E+04 | (K)FLDQV(K)P(L)U)D(V)Y(S)E(K)K(K)                    | 173.5  | 585.8066 | 1170.604 | 0.0112   | 1.5   | 4.37 | 20931.1  | 10.28     | HUMAN | DK0K4A | 60S ribosomal protein L9 (Fragment)                          |                     |
| 23564 | dirMS_041712_NAR_20mM_plus1.7254.17254.2  | 2 | 4.14 | 0.251E+05 | K44 (K)YVLTN(P)K(V)I)LT(N)P(V)T(G)E(V)G(K)           | 189.97 | 559.3342 | 1003.619 | 0.0132   | -10.7 | 8.75 | 43021.6  | 7.89      | HUMAN | Q96M62 | HM130nucleosome protein Luvf                                 |                     |
| 23565 | dirMS_041712_NAR_30mM_plus2.4070.4070.2   | 2 | 4.14 | 0.847E+05 | M299m (M)K(N)M(M)K(N)M(A)C(D)P(R)H(K)                | 68.23  | 549.2125 | 1065.427 | 31.9903  | 0.4   | 5.84 | 50199.4  | 4.75      | HUMAN | ANNZ22 | Tubulin beta-8 chain-like protein LOC260334                  |                     |
| 23566 | dirMS_041712_NAR_30mM_plus2.6125.6125.2   | 2 | 4.14 | 0.908E+04 | (K)SINALS(K)S(N)A(L)S(A)E(G)K(F)                     | 86.25  | 504.2397 | 1007.483 | -0.1015  | -10.4 | 5.72 | 41431.4  | 8.98      | HUMAN | H8BP5  | Protein fantom (Fragment)                                    |                     |
| 23567 | dirMS_041712_NAR_30mM_plus2.672.672.2     | 2 | 4.14 | 0.206E+05 | (K)IADME(K)A(L)M)A)W(L)E(A)R(L)                      | 89.07  | 418.1994 | 835.387  | 0.0409   | 5.9   | 4.4  | 58865.7  | 6.26      | HUMAN | QBW1P1 | Paraspeckle component 1                                      |                     |
| 23568 | dirMS_041712_NAR_40mM_plus2.7991.7991.2   | 2 | 4.14 | 0.118E+05 | K151k (K)YVLTN(P)K(V)I)LT(N)P(V)T(G)E(V)G(K)         | 189.37 | 617.484  | 1235.807 | -0.0027  | -12.1 | 6.02 | 17913    | 6.03      | HUMAN | Q96M62 | HM130nucleosome protein Luvf                                 |                     |
| 23569 | dirMS_041712_NAR_50mM_plus2.11490.11490.3 | 3 | 4.14 | 1.253E+05 | (R)KDCDL(R)C(D)LD(V)A(L)S(K)V(K)                     | 128.2  | 474.5801 | 1421.713 | 0.013    | 9.2   | 5.96 | 61363.7  | 8.73      | HUMAN | C9P509 | Prosp1-CoA carboxylase beta chain, mitochondrial             |                     |
| 23570 | dirMS_041712_NAR_50mM_plus2.7598.7598.3   | 3 | 4.14 | 0.504E+04 | (R)DLSSTP(R)D(L)S)T(F)G(L)E(K)D(S)G(K)T(K)           | 105.95 | 468.5732 | 1403.701 | 0.0038   | 2.7   | 4.56 | 27827.6  | 4.93      | HUMAN | PA6821 | Microtubule-associated protein 18                            |                     |
| 23571 | dirMS_041712_NAR_60mM_plus6.476.6476.3    | 3 | 4.14 | 0.341E+05 | M445m (K)KPTSQE(K)G(P)T(S)E(Q)A(L)M(A)M(R)K(L)       | 92.13  | 469.5621 | 1390.663 | 16.0086  | 9.8   | 6    | 49263.1  | 9.73      | HUMAN | Q96C8B | Integrator complex subunit 12                                |                     |
| 23572 | dirMS_041712_NAR_60mM_minus1.1324.11324.2 | 2 | 4.13 | 0.206E+05 | (K)YVLTN(P)K(V)I)LT(N)P(V)T(G)E(V)G(K)               | 189.37 | 617.484  | 1235.807 | -0.0027  | -11.5 | 4.47 | 58865.7  | 6.26      | HUMAN | QBW1P1 | Paraspeckle component 1                                      |                     |
| 23573 | dirMS_041712_NAR_20mM_minus9.770.9770.2   | 2 | 4.13 | 0.336E+05 | (K)IGGGT(K)K(G)G(V)G(V)P(G)R(V)                      | 147.47 | 513.7075 | 1025.61  | -0.0025  | -2.4  | 9.75 | 50482.3  | 9.31      | HUMAN | PR8104 | Elongation factor 1-alpha 1                                  |                     |
| 23574 | dirMS_041712_NAR_30mM_minus1.1483.11483.2 | 2 | 4.13 | 0.100E+05 | (K)YVLTN(P)K(V)I)LT(N)P(V)T(G)E(V)G(K)               | 116.57 | 428.7653 | 856.525  | -0.0018  | -2.7  | 5.97 | 6608.5   | 9.69      | HUMAN | ESRGE2 | Ubiquitin-conjugating enzyme E2 variant 2                    |                     |
| 23575 | dirMS_041712_NAR_30mM_minus2.6948.6948.2  | 2 | 4.13 | 0.365E+05 | (R)TSTNS(R)T(F)E)T(N)Y(R)K(K)                        | 91.98  | 488.2317 | 975.453  | 0.0031   | 3.2   | 8.46 | 43773.3  | 5.26      | HUMAN | FRB729 | Keratin, type I cytoskeletal 18                              |                     |
| 23576 | dirMS_041712_NAR_40mM_minus1.0451.10451.2 | 2 | 4.13 | 0.733E+05 | (R)IVAPEE(R)I(V)A)P(E)H(V)P(L)E(V)P(L)N(P)K(A)       | 144    | 977.5343 | 1954.004 | -0.0031  | -1.6  | 4.75 | 18032.2  | 5.26      | HUMAN | E7EVS6 | Actin, cytoplasmic 1 (Fragment)                              |                     |
| 23577 | dirMS_041712_NAR_50mM_minus1.2590.12590.3 | 3 | 4.13 | 2.102E+05 | S9175m (K)KRSV(L)K(V)A)W(L)E(A)R(L)K(K)              | 139.55 | 640.7016 | 1701.024 | 218.566  | -8.5  | 9.7  | 13658.1  | 5.94      | HUMAN | SMVDF  | SMVDF complex subunit SMVDFC2                                |                     |
| 23578 | dirMS_041712_NAR_50mM_minus1.5855.15855.3 | 3 | 4.13 | 1.174E+05 | M407m (K)A)RTG(T)E(R)I)G(L)E(T)P(D)A(F)T(A)K(V)K(L)  | 158.43 | 643.341  | 1797.946 | 130.0635 | 13.3  | 5.73 | 97805.9  | 6.73      | HUMAN | Q05193 | Dynamin-1                                                    |                     |
| 23579 | dirMS_041712_NAR_50mM_minus1.6132.16132.3 | 3 | 4.13 | 0.159E+05 | M138m (K)GGGLG(K)M(G)C(L)H(M)N(A)U(L)A)D(S)U(L)K(I)  | 160.02 | 590.6502 | 1738.927 | 16.0095  | 8.3   | 6.74 | 26123.4  | 7.07      | HUMAN | EPH929 | Thioredoxin-dependent peroxide reductase, mitochondrial      |                     |
| 23580 | dirMS_041712_NAR_50mM_minus1.0999.10999.3 | 3 | 4.13 | 0.265E+05 | (R)IHPESL(R)I(L)P(E)S(Q)M(A)R(S)                     | 121.37 | 431.2376 | 1291.712 | -0.1135  | -10.4 | 6.79 | 31463.6  | 5.53      | HUMAN | Q97670 | NG1(M)G-dimethylarginine dimethylaminohydrolyase 1           |                     |
| 23581 | dirMS_041712_NAR_60mM_minus1.344.1344.2   | 2 | 4.13 | 0.512E+05 | (R)IHPESL(R)I(L)P(E)S(Q)M(A)R(S)                     | 121.37 | 431.2376 | 1291.712 | -0.1135  | -10.4 | 6.79 | 31463.6  | 5.53      | HUMAN | Q97670 | NG1(M)G-dimethylarginine dimethylaminohydrolyase 1           |                     |
| 23582 | dirMS_041712_NAR_60mM_minus1.9309.19309.3 | 3 | 4.13 | 0.454E+05 | (R)IHPESL(R)I(L)P(E)S(Q)M(A)R(S)                     | 171.93 | 596.2923 | 1786.876 | -0.1135  | -7.6  | 5.92 | 24482.9  | 7.96      | HUMAN | BJA1A9 | Phosphoribosyl pyrophosphate synthetase 1                    |                     |
| 23583 | dirMS_041712_NAR_60mM_minus1.5538.5538.3  | 3 | 4.13 | 1.361E+07 | (K)D5YVG(K)D(S)Y(V)G(D)E(A)Q(S)K(R)G(K)              | 87.62  | 452.2129 | 1354.623 | -0.0039  | -6.1  | 6.56 | 32616.5  | 5.18      | HUMAN | ANL176 | Actin, alpha skeletal muscle                                 |                     |
| 23584 | dirMS_041712_NAR_120mM_plus1.0078.10078.3 | 3 | 4.13 | 1.266E+05 | (K)KLNAD(K)K(N)K(N)A(D)A(L)S(D)R(F)                  | 105.75 | 413.8849 | 1239.644 | -0.0008  | -0.1  | 6.75 | 127856.3 | 9.42      | HUMAN | CRU8H7 | Ar4/FR2 family member 4                                      |                     |
| 23585 | dirMS_041712_NAR_20mM_plus1.5510.15510.3  | 3 | 4.13 | 1.038E+05 | S995M (R)RHNAAE(K)I(V)A)P(E)H(V)P(L)E(V)P(L)N(P)K(A) | 174.58 | 908.3664 | 1501.762 | 95.0533  | 12.2  | 5.4  | 55085.2  | 7.09      | HUMAN | AD1020 | RNA-binding protein MED1A                                    |                     |
| 23586 | dirMS_041712_NAR_20mM_plus1.6667.16667.2  | 2 | 4.13 | 0.256E+04 | (R)ILDPL(R)L(D)Y(F)L(G)G(K)K(L)                      | 185.57 | 547.7827 | 1094.555 | 0.0011   | 2.8   | 4.37 | 61018.6  | 9.44      | HUMAN | BAD1W8 | Probable ATP-dependent RNA helicase DDX5                     |                     |
| 23587 | dirMS_041712_NAR_20mM_plus1.5864.5864.2   | 2 | 4.13 | 0.742E+04 | M283m (R)YD)Dm(R)Y(D)D)M(S)P(R)K(L)                  | 97.63  | 507.6952 | 998.388  | 15.9947  | -0.2  | 3.93 | 51260.6  | 5.39      | HUMAN | PG1978 | Heterogeneous nuclear ribonucleoprotein K                    |                     |
| 23588 | dirMS_041712_NAR_20mM_plus1.9806.9806.2   | 2 | 4.13 | 0.768E+04 | (R)T)YNAS(R)I(T)D)N(A)S)I)P(V)S)D)P(S)G)P(E)R(K)     | 138.97 | 890.9015 | 1780.798 | -0.0027  | -1.5  | 4.03 | 51260.6  | 5.39      | HUMAN | PG1978 | Heterogeneous nuclear ribonucleoprotein K                    |                     |
| 23589 | dirMS_041712_NAR_20mM_plus2.1895.1895.2   | 2 | 4.13 | 0.417E+05 | (K)IADTLE(K)K(L)D)F(L)E(L)V(K)K(L)                   | 152.42 | 538.8004 | 1076.599 | 0.0009   | 0.8   | 4.53 | 5532.6   | 6.02      | HUMAN | 84D1P7 | T-complex protein 1 subunit zeta                             |                     |
| 23590 | dirMS_041712_NAR_40mM_plus2.9710.9710.2   | 2 |      |           |                                                      |        |          |          |          |       |      |          |           |       |        |                                                              |                     |



|       |                                            |   |      |           |                                                |        |          |          |          |       |      |          |       |       |        |                                                          |                                           |
|-------|--------------------------------------------|---|------|-----------|------------------------------------------------|--------|----------|----------|----------|-------|------|----------|-------|-------|--------|----------------------------------------------------------|-------------------------------------------|
| 23758 | dirMS_041712_NAR_120mM_plus.6498.6498.2    | 2 | 4.06 | 1.180E+05 | (RI)KTEISE(R)I/T/T/E/S/V/M/N/R(L)              | 8752   | 604.8002 | 1208.594 | -0.0008  | -0.7  | 5.81 | 37296.3  | 5.3   | HUMAN | F8VU64 | Keratin, type II cytoskeletal 8                          |                                           |
| 23759 | dirMS_041712_NAR_120mM_plus.7220.7320.3    | 3 | 4.06 | 1.321E+05 | (KI)RVERSE(K)M E R V S E/P/C/G/K(K)            | 9137   | 464.8803 | 1376.63  | 16.0417  | 14.2  | 5.9  | 52682.9  | 9.2   | HUMAN | Q969Q9 | Protein nucleic outake homolog 1                         |                                           |
| 23760 | dirMS_041712_NAR_120mM_plus.8663.8663.1    | 0 | 4.06 | 6.13E+05  | (RI)KHTITE(R)K/H/T/T/E/S/V/M/N/R(L)            | 7625   | 501.7271 | 1024.28  | -0.0006  | -0.6  | 6.1  | 64759.2  | 4.8   | 5.4   | HUMAN  | Q13315                                                   | Arch 1, isoform CRA_b                     |
| 23761 | dirMS_041712_NAR_20mM_plus.7821.7821.3     | 3 | 4.06 | 1.006E+05 | (K)QAQAA(K)Q A A A A P A S/V/P/A Q A/P X(R)    | 123.6  | 459.0204 | 1377.448 | -0.0018  | -1.3  | 8.8  | 17808.8  | 11.77 | HUMAN | P47514 | 60S ribosomal protein L29                                |                                           |
| 23762 | dirMS_041712_NAR_20mM_plus.9770.9770.3     | 3 | 4.06 | 2.154E+04 | (K)KAMMPS(K)K A K M P S/A/S T E S(R)           | 138.57 | 431.5577 | 1292.663 | -0.0042  | -3.2  | 9.99 | 91752.1  | 9.17  | HUMAN | Q96PU4 | E3 ubiquitin-protein ligase UHRF2                        |                                           |
| 23763 | dirMS_041712_NAR_30mM_plus.20486.20486.2   | 2 | 4.06 | 0.424E+04 | (K)ILAVNN(K)A L V N M W/P/P R(L)               | 160.68 | 572.32   | 1143.634 | -0.0016  | -1.4  | 9.75 | 42230.8  | 4.77  | HUMAN | AN6N28 | Pu1ative tubulin beta chain-like protein ENSP0000290377  |                                           |
| 23764 | dirMS_041712_NAR_40mM_plus.24584.4584.2    | 2 | 4.06 | 1.193E+05 | (K)RSGGGS(R)Y YG/G/S E G R A(R)                | 7625   | 501.7271 | 1024.28  | -0.0006  | -0.6  | 6.1  | 64759.2  | 4.8   | 5.4   | HUMAN  | F8VU64                                                   | Heterogeneous nuclear ribonucleoprotein L |
| 23765 | dirMS_041712_NAR_40mM_plus.9695.9695.3     | 3 | 4.06 | 0.222E+05 | (R)AADEED(R)A A E/D/V A A A P P L A G R(L)     | 121.02 | 572.6438 | 1715.919 | -0.0019  | -1.1  | 6.12 | 73566.7  | 10.21 | HUMAN | B3KXW6 | Alpha-1-uridonidase                                      |                                           |
| 23766 | dirMS_041712_NAR_50mM_plus.14772.14772.3   | 3 | 4.06 | 2.129E+05 | (R)JLSNLEI(R)A L S/N U/E/S P G P P L A R R(M)  | 146.78 | 610.9972 | 1830.982 | -0.005   | -2.7  | 8.79 | 16443.8  | 5     | HUMAN | HDYD50 | Ubiquitin-1 (Fragment)                                   |                                           |
| 23767 | dirMS_041712_NAR_50mM_plus.7824.7824.2     | 2 | 4.06 | 0.633E+04 | (R)EGITPLE(R)G T P L R D/P P T(K)              | 106.97 | 603.309  | 1265.605 | -0.0059  | -4.9  | 4.37 | 10156.7  | 4.12  | HUMAN | Q5JUL1 | G antigen family E member 1                              |                                           |
| 23768 | dirMS_041712_NAR_60mM_plus.17355.17355.3   | 3 | 4.06 | 1.180E+05 | (R)IDITREU(R)D T/E L/V L/E R(D)                | 147.43 | 458.2494 | 1372.743 | -0.0094  | -6.9  | 4.41 | 39931.9  | 4.74  | HUMAN | EP9H10 | Zinc finger and SCAN domain-containing protein 18        |                                           |
| 23769 | dirMS_041712_NAR_60mM_plus.5422.5422.3     | 0 | 4.06 | 1.156E+04 | (R)IMEIEM(R)M E/H H G/D M E(K)                 | 147.43 | 458.2494 | 1372.743 | -0.0094  | -6.9  | 4.41 | 39931.9  | 4.74  | HUMAN | EP9H10 | Zinc finger, proline- and glutamine-rich (Fragment)      |                                           |
| 23770 | dirMS_041712_NAR_120mM_minus.12874.12874.3 | 3 | 4.05 | 0.157E+06 | (R)ILIGDRP(R)I Q/G R P A/E L A A D(P)          | 125.03 | 455.8997 | 1297.722 | 79.9623  | -2.9  | 8.75 | 18012.3  | 10.59 | HUMAN | C91V46 | Golgi to ER traffic protein 4 homolog (Fragment)         |                                           |
| 23771 | dirMS_041712_NAR_120mM_minus.5869.5869.3   | 3 | 4.05 | 0.104E+05 | (K)SIIHALTA(K)S I A L T A/D/A A A D A/P(K)     | 152.02 | 450.2345 | 1427.338 | 79.9513  | -10   | 4.21 | 23769.1  | 6.17  | HUMAN | G3XAA0 | AT rich interactive domain 18 (SWI1-like), isoform CRA_a |                                           |
| 23772 | dirMS_041712_NAR_120mM_minus.6779.6779.2   | 2 | 4.05 | 1.162E+05 | (K)IVDVEY(K)Q V/Q I/V P/V K G I(T)K(S)         | 113.95 | 590.8128 | 1180.621 | -0.0025  | -2.1  | 6.11 | 20069.4  | 6.74  | HUMAN | EP9K54 | Heat shock cognate 71 kDa protein (Fragment)             |                                           |
| 23773 | dirMS_041712_NAR_20mM_minus.13677.13677.2  | 2 | 4.05 | 0.155E+05 | (K)IAIQGL(K)A L I Q/G V I/G L E(L)K(E)         | 187.58 | 634.9812 | 1625.757 | -0.0023  | -1.8  | 6.05 | 26161.1  | 5.68  | HUMAN | EP9PU0 | Epitakin                                                 |                                           |
| 23774 | dirMS_041712_NAR_20mM_minus.7023.7023.2    | 2 | 4.05 | 0.211E+05 | (R)IDPEM(R)D I E m n P E A A/K(S)              | 117.97 | 559.7733 | 1102.545 | 15.9944  | -0.4  | 4.41 | 26091.9  | 4.7   | HUMAN | PS1857 | Hepatoma-derived growth factor                           |                                           |
| 23775 | dirMS_041712_NAR_20mM_minus.8727.8727.2    | 2 | 4.05 | 0.191E+04 | (K)ITLDNA(K)I/T/L/D A N Y m E(K)K              | 136.55 | 607.2934 | 1197.582 | 15.9975  | 2.1   | 4.37 | 30947.9  | 6.47  | HUMAN | HBQ334 | Pyruvate kinase                                          |                                           |
| 23776 | dirMS_041712_NAR_30mM_minus.17685.17685.2  | 2 | 4.05 | 0.208E+05 | (R)IDEMD(R)T E I/M/D M V/L/K(H)                | 151.11 | 551.2565 | 1021.502 | 0.0034   | 3.4   | 4.37 | 46013.4  | 5.38  | HUMAN | PS2597 | Heterogeneous nuclear ribonucleoprotein F                |                                           |
| 23777 | dirMS_041712_NAR_30mM_minus.2455.6453.2    | 2 | 4.05 | 1.103E+05 | (R)KKEWE(R)R E E W/E/R(E)                      | 89.35  | 438.7093 | 976.421  | -0.0097  | -8.9  | 4.79 | 109165.8 | 8.54  | HUMAN | CFE853 | Zinc finger CCH domain-containing protein 18             |                                           |
| 23778 | dirMS_041712_NAR_30mM_minus.2179.7179.2    | 2 | 4.05 | 0.165E+05 | (K)IVPHPE(K)T V/P V P m E R(L)                 | 93.98  | 456.2163 | 895.434  | 15.9911  | -4.2  | 5.66 | 67446.5  | 5.63  | HUMAN | FV0E13 | LIM domain and actin-binding protein 1                   |                                           |
| 23779 | dirMS_041712_NAR_40mM_minus.10346.10346.2  | 2 | 4.05 | 0.931E+05 | (R)IVAPEE(R)A/P E H/P L V L E/A P L/P/K(A)     | 143.67 | 977.5343 | 1954.064 | -0.0031  | -1.6  | 4.75 | 18032.2  | 5.25  | HUMAN | FV7E56 | Actin, cytoplasmic 1 (Fragment)                          |                                           |
| 23780 | dirMS_041712_NAR_40mM_minus.2568.6568.2    | 2 | 4.05 | 0.225E+05 | (K)ILAAED(K)S P/L A A/D V/P(R)T                | 107    | 404.2037 | 807.399  | -0.0007  | -0.7  | 4.21 | 48845.9  | 4.72  | HUMAN | CAAM86 | Keratin, type I cuticular Ha5                            |                                           |
| 23781 | dirMS_041712_NAR_50mM_minus.17394.17394.3  | 3 | 4.05 | 2.149E+04 | (K)INSPIH(R)S K/J/A R M A K I/T H V E G(K)     | 167.3  | 589.9831 | 1769.953 | -0.0187  | -10.6 | 9.99 | 19125.2  | 7.07  | HUMAN | Q13029 | PK domain zinc finger protein 2                          |                                           |
| 23782 | dirMS_041712_NAR_60mM_minus.19382.19382.3  | 3 | 4.05 | 1.189E+05 | (R)IKAHWP(R)K A I I I F/V P P A Q A/P(K)       | 172.82 | 498.3209 | 1465.95  | -0.0023  | -1.6  | 10   | 23113.5  | 4.05  | HUMAN | EP9H10 | 40S ribosomal protein S7                                 |                                           |
| 23783 | dirMS_041712_NAR_60mM_minus.6934.6934.3    | 3 | 4.05 | 1.425E+05 | (K)IKXENM(K)K L/E N E M N M/E G N L/P(K)       | 96.63  | 549.6071 | 1646.788 | 0.0191   | 11.6  | 4.79 | 93493.8  | 9.34  | HUMAN | B4D2N9 | Rho GTPase-activating protein 11A                        |                                           |
| 23784 | dirMS_041712_NAR_120mM_plus.11773.11773.4  | 4 | 4.05 | 1.391E+05 | (K)SIVVEGE(K)S V S V L E K N/P T E V S Y(K)    | 114.12 | 401.2306 | 1601.911 | -0.0103  | -6.4  | 8.5  | 104919.7 | 9.47  | HUMAN | Q6ZKVS | Transmembrane and TPR repeat-containing protein 8        |                                           |
| 23785 | dirMS_041712_NAR_120mM_plus.13625.13625.2  | 2 | 4.05 | 0.203E+05 | (K)APLAATI(K)A P V/L I/A/T D V A S R(G)        | 166.55 | 613.8559 | 1226.717 | -0.0058  | -4.7  | 5.88 | 61018.6  | 9.44  | HUMAN | B4DLW8 | Probable ATP-dependent RNA helicase DDX5                 |                                           |
| 23786 | dirMS_041712_NAR_20mM_plus.2492.4892.2     | 2 | 4.05 | 0.189E+05 | (K)KQVQV(K)S L/G T/V M S I/G R A(R)            | 76.25  | 425.925  | 1245.501 | -0.0004  | -0.4  | 8.75 | 67446.5  | 5.63  | HUMAN | FV0E13 | 14-3-3 protein gamma                                     |                                           |
| 23787 | dirMS_041712_NAR_40mM_plus.11091.11091.3   | 3 | 4.05 | 0.954E+04 | (K)IAJLQAN(K)A S D V/A M E L/P/T H P/R(L)      | 131.15 | 612.6252 | 1189.937 | -0.0044  | -5.1  | 5.32 | 12926.1  | 4.4   | HUMAN | F7KXW0 | 14-3-3 protein epsilon (Fragment)                        |                                           |
| 23788 | dirMS_041712_NAR_40mM_plus.2.11342.11342.3 | 3 | 4.05 | 2.283E+04 | (R)RJAADV(R)R A A D V E P S L P E/P P R(K)     | 132.63 | 589.9796 | 1564.841 | 203.8001 | 0.4   | 6.18 | 84483.4  | 10.39 | HUMAN | ARM056 | Uncharacterized protein                                  |                                           |
| 23789 | dirMS_041712_NAR_40mM_plus.8315.8315.2     | 2 | 4.05 | 0.712E+04 | (K)KNMGLV(K)M I/G L Y/L E R(V)                 | 109.7  | 470.2221 | 939.435  | 0.0016   | 1.8   | 6    | 43371.1  | 9.64  | HUMAN | F7EHW2 | Aspartate aminotransferase                               |                                           |
| 23790 | dirMS_041712_NAR_40mM_plus.2281.912.2      | 2 | 4.05 | 0.529E+05 | (K)SSFSFSS(K)S F/S F/D S I/V L E R(K)          | 94.23  | 481.9355 | 1163.579 | -0.0009  | -1.1  | 5.38 | 40331.40 | 6.72  | HUMAN | Q13029 | PK domain zinc finger protein 2                          |                                           |
| 23791 | dirMS_041712_NAR_40mM_plus.9814.9814.2     | 2 | 4.05 | 0.948E+04 | (R)GYSEED(R)G Y F/S E E M N R(L)               | 121.53 | 566.7355 | 1132.473 | -0.0091  | -8.9  | 4.53 | 53377.8  | 5.74  | HUMAN | Q15149 | Plectin                                                  |                                           |
| 23792 | dirMS_041712_NAR_50mM_plus.2.10668.10668.3 | 3 | 4.05 | 1.365E+05 | (K)QAALRD(K)Q I A L R D N S T/M Y M M A(K)     | 123.58 | 596.6125 | 1787.824 | -0.0008  | -0.4  | 8.63 | 83605    | 4.47  | HUMAN | PD2838 | Heat shock protein HSP 90-beta                           |                                           |
| 23793 | dirMS_041712_NAR_50mM_plus.10875.10875.3   | 3 | 4.05 | 1.428E+05 | (K)NGLMKN(K)M Q/L T S N P E/N/T/P D A R(L)     | 124.88 | 611.9758 | 1833.909 | 0.0039   | 2.1   | 6.07 | 72445.7  | 5.07  | HUMAN | P11021 | 78 kDa glucose-regulated protein                         |                                           |
| 23794 | dirMS_041712_NAR_60mM_plus.12226.12226.3   | 3 | 4.05 | 0.689E+05 | (K)NIGM(K)I Q T G/M T S/L I A/K(K)             | 120.63 | 407.5532 | 1220.656 | -0.0105  | -8.6  | 5.06 | 79456.1  | 5.93  | HUMAN | G3V0X4 | Nesprin-2                                                |                                           |
| 23795 | dirMS_041712_NAR_60mM_plus.13307.13307.3   | 3 | 4.05 | 0.181E+05 | (K)KISGTY(K)S L/G T/V M S I/G R A(R)           | 125.78 | 425.563  | 1274.685 | -0.0007  | -0.4  | 8.75 | 67446.5  | 5.63  | HUMAN | FV0E13 | LIM domain and actin-binding protein 1                   |                                           |
| 23796 | dirMS_041712_NAR_120mM_minus.8628.8628.3   | 3 | 4.04 | 0.154E+05 | (R)ISQJLS(R)S Q/L L/J G S/A/H E V R(F)         | 101.63 | 442.2355 | 1324.697 | -0.0048  | -3.7  | 6.47 | 28798.6  | 5.23  | HUMAN | AN6N51 | Spectrin alpha chain, non-erythrocytic 1                 |                                           |
| 23797 | dirMS_041712_NAR_120mM_minus.8838.8838.2   | 2 | 4.04 | 0.509E+05 | (K)HFMVLS(K)H F I/V A/L S T N/T/V(T)K          | 103.17 | 609.6267 | 1218.648 | -0.0015  | -1.3  | 8.76 | 63374.2  | 8.64  | HUMAN | PO6744 | Glucose-6-phosphate isomerase                            |                                           |
| 23798 | dirMS_041712_NAR_20mM_minus.2190.9190.2    | 2 | 4.04 | 0.972E+04 | (R)ITLLEE(R)I L T U/E E m T(K)                 | 142.02 | 611.843  | 1206.629 | 15.9927  | -1.8  | 4.25 | 51244.1  | 4.82  | HUMAN | F5H312 | Protein disulfide-isomerase                              |                                           |
| 23799 | dirMS_041712_NAR_20mM_minus.9804.9804.2    | 2 | 4.04 | 0.187E+05 | (K)KQVQV(K)S L/G T/V M S I/G R A(R)            | 114.58 | 541.784  | 914.467  | -0.0078  | -1.4  | 6.18 | 40331.40 | 6.72  | HUMAN | EP9H10 | 40S ribosomal protein S7                                 |                                           |
| 23800 | dirMS_041712_NAR_216E3.126E3.2             | 2 | 4.04 | 0.332E+04 | (K)I2593(K)T S I G S/V N/V T L(K)              | 123.93 | 534.7976 | 1068.594 | -0.0056  | -5.3  | 8.26 | 13386.2  | 9.99  | HUMAN | HY01A2 | Signal recognition particle 14 kDa protein               |                                           |
| 23801 | dirMS_041712_NAR_30mM_minus.7976.7976.2    | 2 | 4.04 | 0.327E+05 | (K)YVYVEG(K)Y V V V S/G S K(R)                 | 98     | 440.7384 | 880.477  | -0.0079  | -9.9  | 5.97 | 55097.1  | 7.14  | HUMAN | Q75844 | CAAX prenyl transferase 1 homolog                        |                                           |
| 23802 | dirMS_041712_NAR_30mM_plus.9927.9927.2     | 2 | 4.04 | 1.425E+05 | (K)IERFTR(K)E R F T/R(D)                       | 108.53 | 411.2348 | 821.463  | -0.0025  | -0.6  | 9.6  | 78521.8  | 9.1   | HUMAN | G5E988 | Zinc finger protein 180                                  |                                           |
| 23803 | dirMS_041712_NAR_30mM_plus.5700.5700.3     | 3 | 4.04 | 0.230E+04 | (K)KISSAS(K)S I/V S E A/H S/T T E/P S/P A R(R) | 93.32  | 406.9511 | 1088.836 | -0.0026  | -1.6  | 5.38 | 33003.9  | 6.99  | HUMAN | F5H187 | Protein L12218A                                          |                                           |
| 23804 | dirMS_041712_NAR_60mM_minus.18253.18253.3  | 3 | 4.04 | 0.933E+04 | (R)ILNVAF(R)N V V A F L/N L E/P T(K)           | 162.73 | 452.9408 | 1356.789 | 0.0193   | 14.2  | 6    | 68619.5  | 9.37  | HUMAN | EP9N93 | Nuclear RNA export factor 1 (Fragment)                   |                                           |
| 23805 | dirMS_041712_NAR_60mM_minus.8885.8885.3    | 3 | 4.04 | 0.432E+03 | (R)ITLHSD(R)T L H S D E G T V L/D S/D(R)A      | 109.43 | 581.2735 | 1697.746 | -0.0032  | -1.9  | 4.03 | 23307.1  | 5.11  | HUMAN | EP9MH2 | Peptidyl-prolyl cis-trans isomerase (Fragment)           |                                           |
| 23806 | dirMS_041712_NAR_120mM_plus.19439.19439.2  | 2 | 4.04 | 1.164E+05 | (K)KIRTEIA(K)K I E E L A F R/R(K)              | 105.64 | 693.3483 | 1305.716 | 79.9932  | 5     | 6.14 | 151497.3 | 6.37  | HUMAN | Q2M1P5 | Kinesin-like protein KIF7                                |                                           |
| 23807 | dirMS_041712_NAR_120mM_plus.9536.9536.3    | 3 | 4.04 | 1.391E+05 | (K)SIFTRFS(K)T F R E S I P L R(K)              | 124.63 | 407.8773 | 1221.622 | -0.0049  | -4    | 5.87 | 53030.7  | 11.3  | HUMAN | EP9I47 | BC2-associated transcription factor 1                    |                                           |
| 23808 | dirMS_041712_NAR_20mM_plus.11615.11615.2   | 2 | 4.04 | 0.133E+05 | (K)KIDVTA(K)A S V A P T/S V I V R(K)           | 152.95 | 494.295  | 992.541  | -0.0014  | -1.4  | 6.05 | 24936.4  | 6.34  | HUMAN | G3V0X4 | Nesprin-2                                                |                                           |
| 23809 | dirMS_041712_NAR_20mM_plus.12143.12143.2   | 2 | 4.04 | 0.344E+04 | (K)ILQAFSA(K)Q I A/Q S/A I E C N K(K)          | 156.63 | 719.8475 | 1438.699 | -0.0118  | -8.2  | 6    | 52088.9  | 4.35  | HUMAN | Q02790 |                                                          |                                           |

|       |                                           |   |      |                    |                                                  |        |          |          |          |       |      |          |             |        |                                                                              |
|-------|-------------------------------------------|---|------|--------------------|--------------------------------------------------|--------|----------|----------|----------|-------|------|----------|-------------|--------|------------------------------------------------------------------------------|
| 23867 | dirMS_041712_NAR_60mM_plus.6665.6665.3    | 3 | 4.02 | 0.567E+05          | (KIQSDFDK)(K)S Q/F S D V P/Q/D/R(G)              | 93.3   | 436.218  | 1306.639 | 0.0008   | 0.6   | 5.68 | 13194    | 9.99 HUMAN  | EP9170 | Chitinase domain-containing protein 1 (Fragment)                             |
| 23868 | dirMS_041712_NAR_120mM_minus.13652.3      | 3 | 4.01 | 1.566E+05 T1881    | (KYN)LAIR(K)N Y/L A R G L T W(K)K                | 128.55 | 468.236  | 1322.722 | 79.5077  | -1    | 9.99 | 33386    | 5.95 HUMAN  | F5H788 | E3 ubiquitin-protein ligase CHFR                                             |
| 23870 | dirMS_041712_NAR_120mM_plus.7088.7088     | 3 | 4.01 | 0.438E+05          | (KIQSDFDK)(K)S Q/F S D V P/Q/D/R(G)              | 93.3   | 436.218  | 1306.639 | 0.0008   | -2.1  | 4.53 | 10154    | 6.07 HUMAN  | DI2955 | Sorbitol dehydrogenase                                                       |
| 23871 | dirMS_041712_NAR_120mM_plus.8941.8941.3   | 3 | 4.01 | 0.339E+05          | (KIQSDFDK)(K)S Q/F S D V P/Q/D/R(G)              | 93.3   | 436.218  | 1306.639 | 0.0008   | 11.5  | 5.32 | 22067.8  | 7.85 HUMAN  | C9174  | V-set and immunoglobulin domain-containing protein 4 (Fragment)              |
| 23872 | dirMS_041712_NAR_20mM_minus.13846.13846.2 | 2 | 4.01 | 0.863E+04 5583M    | (KJVAJEA)(K)A/L V A E S H N N(K)N                | 167.62 | 659.8282 | 1099.556 | 219.0927 | 13.9  | 6.79 | 8003.5   | 8.34 HUMAN  | Q92541 | RNA polymerase-associated protein RTF1 homolog                               |
| 23873 | dirMS_041712_NAR_20mM_plus.13846.13846.2  | 2 | 4.01 | 0.315E+05          | (KILGSGA)(K)G G S A V I/V S L/E/G/P(L)E          | 188.88 | 670.8912 | 1340.778 | -0.0033  | -2.4  | 6    | 22956    | 8.8 HUMAN   | EP9225 | Collin-1                                                                     |
| 23874 | dirMS_041712_NAR_30mM_minus.12114.12114.3 | 3 | 4.01 | 0.432E+04          | (KIQSDFDK)(K)S Q/F S D V P/Q/D/R(G)              | 93.3   | 436.218  | 1306.639 | 0.0008   | -1    | 4.53 | 10254.2  | 5.05 HUMAN  | AK94   | Alpha actinin 4 short isoform                                                |
| 23875 | dirMS_041712_NAR_30mM_minus.6720.6720.2   | 2 | 4.01 | 0.958E+04          | (RISLSEGR)(R)S Q/L S E/G/Y(Q)R(M)                | 89.97  | 525.7321 | 1104.459 | -0.0023  | -2.1  | 4.37 | 104078.9 | 5.71 HUMAN  | AKMXP9 | Matrin-3                                                                     |
| 23876 | dirMS_041712_NAR_30mM_minus.7180.7180.2   | 2 | 4.01 | 2.470E+05 5692S    | (KJLEKEEK)(K)E/L K E I(L)K(S)K                   | 93.02  | 535.762  | 990.547  | 79.7901  | 3.5   | 6.33 | 152344.8 | 4.64 HUMAN  | G3V599 | Cutaneous T-cell lymphoma-associated antigen 5                               |
| 23877 | dirMS_041712_NAR_40mM_minus.2479.9479.3   | 3 | 4.01 | 0.999E+04          | (KJASADIA)(K)A S D V I A M L E/P R/P H P I(R)L   | 138.25 | 607.3174 | 1819.937 | -0.003   | 0.3   | 5.32 | 12926.1  | 4.4 HUMAN   | EP9120 | 14-3-3 protein epsilon (Fragment)                                            |
| 23878 | dirMS_041712_NAR_40mM_minus.15412.15412.3 | 3 | 4.01 | 1.173E+05          | (KIDVFLUK)(K)N V I/L P/K C V/G P/E V E(K)A       | 156.42 | 583.3014 | 1747.893 | -0.0009  | -2.2  | 4.2  | 41827.5  | 7 HUMAN     | I72749 | Phosphoglycerate kinase                                                      |
| 23879 | dirMS_041712_NAR_50mM_plus.17413.17413.3  | 3 | 4.01 | 1.259E+04 965S     | (KIQSDFDK)(K)S Q/F S D V P/Q/D/R(G)              | 93.3   | 436.218  | 1306.639 | 0.0008   | -4.9  | 9.2  | 13157.7  | 9.12 HUMAN  | Q91217 | HuChc1 kinase (Fragment)                                                     |
| 23880 | dirMS_041712_NAR_50mM_minus.2154.7154.3   | 3 | 4.01 | 1.286E+04          | (RISQCLQR)(R)S Q/L C L Q P/E R E Q D A(Q)K(Q)    | 107.95 | 629.6378 | 1886.902 | -0.0037  | -1.9  | 4.68 | 23297.7  | 6.12 HUMAN  | K7E5F4 | Uncharacterized protein (Fragment)                                           |
| 23881 | dirMS_041712_NAR_60mM_minus.10927.10927.3 | 3 | 4.01 | 1.103E+05          | (KJTVACDF)(K)T A/V C D/P P R G I(K)K             | 119.85 | 442.9098 | 1326.72  | -0.005   | -3.8  | 8.41 | 50199.4  | 4.07 HUMAN  | ANNZ22 | Tubulin beta-8 chain-like protein LOC260334                                  |
| 23882 | dirMS_041712_NAR_60mM_minus.11241.11241.3 | 3 | 4.01 | 1.168E+05          | (RAEEDGGR)(R)A E D E/G A/R A/Q/L V(K)S           | 122.48 | 453.2461 | 1357.707 | -0.0017  | 12.3  | 4.68 | 23239.1  | 5.52 HUMAN  | F22208 | Myosin-14                                                                    |
| 23883 | dirMS_041712_NAR_60mM_plus.14041.14041.3  | 3 | 4.01 | 2.29E+04           | (KIQVFLFK)(K)I V F/L Q L S A/R(G)                | 138.03 | 423.4616 | 1269.731 | 0.0042   | 3.3   | 8.76 | 482883.6 | 6.07 HUMAN  | DI2955 | AKN-13                                                                       |
| 23884 | dirMS_041712_NAR_60mM_minus.15309.15309.2 | 2 | 4.01 | 0.413E+05          | (RIEHALLA)(R)H A/L A/L A/V/T L G V(K)Q(L)        | 144.62 | 657.873  | 1314.742 | -0.0029  | -2.2  | 6.85 | 50482.3  | 9.31 HUMAN  | EP6804 | Elongation factor 1-alpha 1                                                  |
| 23884 | dirMS_041712_NAR_120mM_plus.6049.6049.3   | 3 | 4.01 | 1.376E+04          | (RIVDSNNS)(R)V/D I/S N S/G G/L E R I(Q)T(R)      | 85.05  | 504.2287 | 1510.688 | -0.0165  | -10.9 | 4.68 | 41280.4  | 4.9 HUMAN   | BAD863 | 26S protease regulatory subunit 4                                            |
| 23885 | dirMS_041712_NAR_120mM_plus.7284.7284.3   | 3 | 4.01 | 1.299E+04          | (KINRVEEK)(K)N R E/V D V L A(L)A(K)V             | 91.33  | 403.2084 | 1207.607 | 0.0041   | 3.4   | 6.07 | 23970.7  | 5.47 HUMAN  | G69192 | THO complex subunit 7 homolog                                                |
| 23886 | dirMS_041712_NAR_120mM_plus.7418.7418.2   | 2 | 4.01 | 0.191E+05          | (KIQHVAQ)(K)I V G/W V Q/V P(R)E                  | 92.48  | 496.2727 | 991.543  | -0.0051  | -5.1  | 9.75 | 2312.8   | 9.55 HUMAN  | AKN12L | Polypyrimidine tract binding protein 1, isoform CRA_e                        |
| 23887 | dirMS_041712_NAR_120mM_plus.9611.9611.4   | 4 | 4.01 | 1.640E+04 4385K    | (RISVYLR)(R)S L V L Q/H Q/H S H V(K)N            | 102.98 | 442.2427 | 1651.903 | 114.0463 | 1.99  | 9.99 | 44933.5  | 7.98 HUMAN  | H78X01 | Zinc finger protein 306, isoform CRA_a                                       |
| 23888 | dirMS_041712_NAR_120mM_plus.9788.9788.4   | 4 | 4.01 | 2.706E+05          | (KJMGKIE)(K)K/W G I E K L D L E/L T E(L)K        | 104.53 | 408.4892 | 1630.945 | -0.0098  | -6    | 6.18 | 79656.1  | 8.97 HUMAN  | Q4G163 | F-box only protein 43                                                        |
| 23889 | dirMS_041712_NAR_120mM_plus.9909.9909.4   | 4 | 4.01 | 1.356E+05          | (KJDTKTK)(K)T G K T G P T P V E/P V/A(H)R(I)     | 104.8  | 412.9179 | 1648.865 | -0.005   | 0.3   | 5.45 | 5429.1   | 9.6 HUMAN   | ESR91  | 40S ribosomal protein S20                                                    |
| 23890 | dirMS_041712_NAR_20mM_plus.16056.16056.3  | 3 | 4.01 | 0.441E+03 M22m1    | (KJNVLTPR)(K)R L T V/P E L T Q/Q V F(D)A(K)      | 162.88 | 569.9583 | 1691.867 | 15.9931  | -1.1  | 4.37 | 42831.5  | 4.86 HUMAN  | AK8554 | HCG19835A, isoform CRA_f                                                     |
| 23891 | dirMS_041712_NAR_20mM_plus.19043.19043.3  | 3 | 4.01 | 0.726E+04          | (KIQLVND)(K)I Q/V L Q/L A/L E I(K)K              | 202.9  | 482.6666 | 1445.811 | -0.0008  | -4    | 5.83 | 20181.7  | 9.99 HUMAN  | EP9120 | Plectin (Fragment)                                                           |
| 23892 | dirMS_041712_NAR_20mM_plus.8439.8439.2    | 2 | 4.01 | 0.272E+04 M254m4M  | (KJLUDDM)(R)I L D/D V M A/Q/A M(N)S              | 128.07 | 633.8075 | 1234.617 | 31.9907  | 0.7   | 4.21 | 46943.7  | 6.54 HUMAN  | Q75874 | Isooctate dehydrogenase [NADP] cytoplasmic                                   |
| 23893 | dirMS_041712_NAR_30mM_plus.21635.21635.2  | 2 | 4.01 | 0.201E+05          | (RITTFNAG)(R)T N/A/F/A/G L/S Q/G L R(I)          | 169.25 | 683.7499 | 1377.748 | -0.006   | -4.3  | 9.41 | 113880.5 | 9.18 HUMAN  | P09874 | Poly[ADP-ribose] polymerase 1                                                |
| 23894 | dirMS_041712_NAR_30mM_plus.21824.21824.2  | 2 | 4.01 | 0.227E+05          | (RITTFNAG)(R)T N/A/F/A/G L/S Q/G L R(I)          | 169.43 | 693.3499 | 1377.748 | -0.006   | -4.3  | 9.41 | 113880.5 | 9.18 HUMAN  | P09874 | Poly[ADP-ribose] polymerase 1                                                |
| 23895 | dirMS_041712_NAR_30mM_plus.27990.27990.2  | 2 | 4.01 | 0.201E+05          | (KIQSDFDK)(K)S Q/F S D V P/Q/D/R(G)              | 93.3   | 436.218  | 1306.639 | 0.0008   | 11.2  | 4.27 | 96266.9  | 6.39 HUMAN  | EP9120 | Elongation factor 3                                                          |
| 23896 | dirMS_041712_NAR_40mM_plus.10600.10600.2  | 2 | 4.01 | 0.756E+04          | (RILSLSQL)(R)I S/E S L S/L F(K)K                 | 127.93 | 533.7789 | 1066.553 | -0.0022  | -2.1  | 6    | 69661.6  | 9.75 HUMAN  | Q69P96 | RNA-binding protein 14                                                       |
| 23897 | dirMS_041712_NAR_40mM_plus.11202.11202.3  | 3 | 4.01 | 1.634E+04          | (KJTVANVC)(K)T V N V V G F/E/P S/G A I A(K)A     | 105.35 | 558.6431 | 1673.922 | -0.0073  | -4.4  | 8.26 | 83905.8  | 6.62 HUMAN  | DI2150 | Glycine-tRNA ligase                                                          |
| 23898 | dirMS_041712_NAR_40mM_plus.12136.12136.2  | 2 | 4.01 | 0.328E+05          | (KJLYANM)(K)I Y/A N M F/W(R)E                    | 137.6  | 522.2521 | 1043.498 | -0.001   | -0.9  | 6    | 9740.1   | 10.08 HUMAN | HY0FQ2 | Peptidyl-prolyl cis-trans isomerase FKBP4, N-terminally processed (Fragment) |
| 23899 | dirMS_041712_NAR_40mM_plus.17625.17625.3  | 3 | 4.01 | 1.012E+05 M154m4M  | (RHMJGDM)(R)M G E Y M D P/R(E)                   | 148.93 | 658.3372 | 1548.966 | -0.0086  | 14.7  | 4.25 | 23236.6  | 5.53 HUMAN  | AKN133 | Isomorphin of Tapsin                                                         |
| 23900 | dirMS_041712_NAR_40mM_plus.515.5175.2     | 2 | 4.01 | 0.348E+05 M154m4M  | (RHMJGDM)(R)M G E Y M D P/R(E)                   | 85.57  | 451.1811 | 869.364  | 31.9905  | 0.7   | 5.59 | 26419.2  | 5.1 HUMAN   | HOYK97 | Splicing factor, proline- and glutamine-rich (Fragment)                      |
| 23901 | dirMS_041712_NAR_40mM_plus.6963.6963.2    | 2 | 4.01 | 0.264E+04          | (RJDYDDM)(R)D Y/D D M S P R(I)K                  | 100.75 | 499.6964 | 998.388  | -0.0029  | -2.9  | 9.39 | 51260.6  | 5.39 HUMAN  | PE1978 | Heterogeneous nuclear ribonucleoprotein K                                    |
| 23902 | dirMS_041712_NAR_40mM_plus.7493.7493.3    | 3 | 4.01 | 0.628E+03 T40f     | (KJHAELAK)(K)H A E V L G S/G N L R(M)            | 104.08 | 435.8697 | 1225.628 | 79.9562  | -0.1  | 6.75 | 14802.4  | 4.98 HUMAN  | DR6C33 | MOB kinase activator 1B (Fragment)                                           |
| 23903 | dirMS_041712_NAR_40mM_plus.8726.8726.2    | 2 | 4.01 | 1.120E+05          | (KJHSDGQ)(K)H L/R D S(G)Y(F)                     | 113.28 | 429.2135 | 857.415  | 0.0045   | 5.3   | 5.83 | 13902.7  | 5.73 HUMAN  | CI2020 | T-complex protein 1-alpha 1                                                  |
| 23904 | dirMS_041712_NAR_40mM_plus.9277.9277.2    | 2 | 4.01 | 0.146E+05          | (RISDQGR)(R)S T V/A V G V/W(K)K                  | 116.85 | 457.7954 | 914.567  | -0.0034  | -3.7  | 8.75 | 50482.3  | 6.39 HUMAN  | PE6104 | Tubulin beta-8 chain-like protein LOC260334                                  |
| 23905 | dirMS_041712_NAR_50mM_plus.12175.12175.3  | 3 | 4.01 | 1.305E+05          | (KJNVVALK)(K)N Q/V A/L M/P G T V F D A R(K)      | 131.65 | 605.6528 | 1814.951 | -0.0069  | -3.8  | 8.75 | 70336.2  | 5.48 HUMAN  | P08107 | Heat shock 70 kDa protein 1A/1B                                              |
| 23906 | dirMS_041712_NAR_60mM_plus.10034.10034.3  | 3 | 4.01 | 0.194E+05          | (KJTPVEPK)(K)T P P V E P/A(H)R(I)                | 109.87 | 416.5628 | 1247.674 | -0.0004  | 0.3   | 5.37 | 5429.1   | 9.6 HUMAN   | ESR91  | 40S ribosomal protein S20                                                    |
| 23907 | dirMS_041712_NAR_60mM_plus.13571.13571.3  | 3 | 4.01 | 1.502E+05          | (RKNYVYNI)(R)N Y/V I N E A/T G G K Y V P(R)A     | 126.65 | 615.3146 | 1844.934 | -0.0045  | -2.4  | 8.43 | 50386.6  | 4.79 HUMAN  | PE8871 | Tubulin beta-4B chain                                                        |
| 23908 | dirMS_041712_NAR_60mM_plus.16039.16039.3  | 3 | 4.01 | 1.126E+05          | (KJLHVTAL)(K)H L T V E L A/P G/Q/T/D L(K)K       | 141.08 | 462.1216 | 1211.623 | -0.0013  | -1.1  | 4.25 | 42144.4  | 6.56 HUMAN  | AKN133 | Profilin 1, isoform CRA_b                                                    |
| 23909 | dirMS_041712_NAR_60mM_plus.20545.20545.3  | 3 | 4.01 | 0.510E+05          | (KJHLVTE)(K)H L T V E L A/P G/Q/T/D L(K)K        | 107.65 | 524.2198 | 1570.848 | -0.0133  | 8.5   | 5.4  | 63279.5  | 5.83 HUMAN  | QNP916 | mRNA-decapping enzyme 1A                                                     |
| 23910 | dirMS_041712_NAR_60mM_plus.5595.5595.3    | 3 | 4.01 | 1.768E+04 M118m T1 | (R)YANR)(R)Y/A N R V/A V(S)K                     | 87.8   | 519.2487 | 1336.672 | 219.0597 | -9.4  | 9.7  | 41977.7  | 10.08 HUMAN | EP901  | Unconventional myosin-Vc                                                     |
| 23911 | dirMS_041712_NAR_60mM_plus.8833.8833.3    | 3 | 4.01 | 1.426E+05 M239m    | (KIQGDND)(K)G I D G N M H/V R A/V(S)K            | 103.3  | 444.2219 | 134.641  | 16.0106  | -11.7 | 8.76 | 83192.7  | 6.08 HUMAN  | EP9E54 | Kinesin-like protein KIF3A                                                   |
| 23912 | dirMS_041712_NAR_30mM_minus.12203.12203.2 | 2 | 4    | 0.685E+05          | (KJNVAQ)(K)I V G/W V Q/V P(R)E                   | 118.93 | 544.8676 | 1688.61  | -0.0017  | -1.8  | 8.56 | 9740.1   | 10.08 HUMAN | HY0FQ2 | Peptidyl-prolyl cis-trans isomerase FKBP4, N-terminally processed (Fragment) |
| 23913 | dirMS_041712_NAR_30mM_minus.15638.15638.2 | 2 | 4    | 0.154E+05          | (KJAMTGV)(K)M A/T G V E Q/W P P(R)A              | 138.4  | 669.3172 | 1337.631 | -0.0036  | -2.7  | 6.04 | 56186.7  | 5.47 HUMAN  | BAD108 | T-complex protein 1 subunit gamma                                            |
| 23914 | dirMS_041712_NAR_30mM_minus.18672.18672.2 | 2 | 4    | 0.288E+05          | (KJYQLQL)(K)Y/P/L P G I R(K)K                    | 155.77 | 528.816  | 1056.62  | 0.0047   | 4.4   | 8.75 | 45228.3  | 6.03 HUMAN  | F5H373 | Adenosylhomocysteinase                                                       |
| 23915 | dirMS_041712_NAR_30mM_minus.27081.27081.2 | 2 | 4    | 0.172E+05          | (RISQSLR)(R)S Q/L S E/L E T E(R)S                | 92.87  | 610.7948 | 1220.575 | 0.007    | 5.7   | 4.25 | 32423.1  | 6.44 HUMAN  | PI5924 | Desmoplakin                                                                  |
| 23916 | dirMS_041712_NAR_30mM_minus.8094.8094.2   | 2 | 4    | 0.183E+05          | (KJGEGTAE)(K)G S/G T/A/E V L E(K)K               | 98.32  | 495.7298 | 990.511  | -0.0119  | -1.2  | 4.53 | 30947.9  | 6.47 HUMAN  | H93834 | Pyruvate kinase                                                              |
| 23917 | dirMS_041712_NAR_30mM_minus.8762.8762.2   | 2 | 4    | 0.612E+04          | (KIQGESPRT)(K)S Q/F S D V P/Q/D/R(G)             | 93.3   | 436.218  | 1306.639 | 0.0008   | 2.1   | 4.25 | 27327.2  | 6.62 HUMAN  | PE6104 | Chromodomain-helicase-DNA-binding protein 1B                                 |
| 23918 | dirMS_041712_NAR_40mM_minus.6895.6895.3   | 3 | 4    | 0.382E+04          | (R)JALAHS)(R)A A/L A E H S/E V T A/Q P P A A(K)T | 111.18 | 595.3178 | 1783.919 | 0.0204   | 11.4  | 5.4  | 23903    | 4.94 HUMAN  | HY0Y11 | Plectin (Fragment)                                                           |
| 23919 | dirMS_041712_NAR_50mM_minus.14351.14351.3 | 3 | 4    | 0.337E+05          | (KJHLIEVC)(K)H V I E V G T/P P T G C Q/V P(K)K   | 149.9  | 649.0215 | 194      |          |       |      |          |             |        |                                                                              |





|       |                                            |   |      |   |          |         |                                                                |                              |        |          |          |          |       |      |          |       |       |        |                                                                                  |
|-------|--------------------------------------------|---|------|---|----------|---------|----------------------------------------------------------------|------------------------------|--------|----------|----------|----------|-------|------|----------|-------|-------|--------|----------------------------------------------------------------------------------|
| 24085 | dirMS_041712_NAR_50mM_minus.12061.3        | 3 | 3.94 | 0 | 2.85E+05 | M22m    | (KIQGPHLQ)(K)G P L H G M L I N T P / V I V T K I D)            | mDnaE2 methionine            | 136.62 | 595.6534 | 1768.941 | 16.0042  | 5.2   | 8.6  | 26744.2  | 7.15  | HUMAN | ETK664 | Acetyl-CoA carboxylase 1 (Fragment)                                              |
| 24086 | dirMS_041712_NAR_50mM_minus.10057.10057.3  | 3 | 3.94 | 1 | 1.25E+05 |         | (RIGGTFQ)(R)A G V T / V D N V D L / E A T R K I Q)             | mDnaE2 methionine            | 115.55 | 539.6117 | 1616.824 | -0.0033  | -2    | 4.56 | 57991.2  | 6.29  | HUMAN | DA3175 | D-3-phosphoglycerate dehydrogenase                                               |
| 24087 | dirMS_041712_NAR_50mM_minus.23699.23699.3  | 3 | 3.94 | 1 | 2.02E+05 | F34T1   | (RISVSPV)(R)K V A V S V D G T / F Q I A K I Q)                 | lNucleosidomethylation (T)   | 115.55 | 539.6117 | 1616.824 | -0.0033  | -2    | 4.56 | 57991.2  | 6.29  | HUMAN | DA3175 | D-3-phosphoglycerate dehydrogenase                                               |
| 24088 | dirMS_041712_NAR_120mM_plus.7993.7993.3    | 3 | 3.94 | 0 | 4.72E+05 |         | (RISGSMG)(R)S G I S / M D / P S G A H P S V K I Q)             | mDnaE2 methionine            | 94.15  | 462.218  | 1384.627 | 0.011    | 8.7   | 6.46 | 48340.6  | 8.84  | HUMAN | Q07666 | K18 domain-containing RNA-binding and signal transduction-associated protein 1   |
| 24089 | dirMS_041712_NAR_120mM_plus.8105.8127.2    | 3 | 3.94 | 0 | 1.42E+06 |         | (R)HGGVM(R)H I G / M V / M G M / G Q / K I D)                  | mDnaE2 methionine            | 96.13  | 582.8688 | 1171.571 | -0.0007  | -0.6  | 8.76 | 32616.5  | 5.18  | HUMAN | ANL176 | Actin, alpha skeletal muscle                                                     |
| 24090 | dirMS_041712_NAR_20mM_plus.13979.13979.2   | 3 | 3.94 | 0 | 1.34E+05 |         | (R)IGGVDE(R)G G I / V / D / E G A L L R A I K)                 | mDnaE2 methionine            | 167.83 | 550.3066 | 1099.611 | -0.0047  | -4.3  | 4.37 | 57391.2  | 6.29  | HUMAN | DA3175 | D-3-phosphoglycerate dehydrogenase                                               |
| 24091 | dirMS_041712_NAR_20mM_plus.17853.17853.2   | 3 | 3.92 | 0 | 7.58E+06 |         | (R)ITLLPGR(R)T L L / L Q L E P / E T T I K I Q)                | mDnaE2 methionine            | 193.87 | 478.3131 | 955.656  | 0.0003   | 0.3   | 8.41 | 55732.1  | 7.25  | HUMAN | FSH111 | Fibrin(ogen)-fibrin(ogen) lysis inhibitor                                        |
| 24092 | dirMS_041712_NAR_20mM_plus.18258.18258.2   | 3 | 3.94 | 0 | 5.11E+04 |         | (R)EPPQVW(T)I I / P Q I V I Y K I Q)                           | mDnaE2 methionine            | 117.93 | 479.3081 | 957.613  | -0.0042  | -4.4  | 8.75 | 25445.8  | 5.52  | HUMAN | ARMW50 | Lactate dehydrogenase (Fragment)                                                 |
| 24093 | dirMS_041712_NAR_20mM_plus.18817.18817.3   | 3 | 3.94 | 0 | 1.53E+04 | M80m    | (R)APLOD(R)P A P L D / V P / P / G / T / m I R I G)            | mDnaE2 methionine            | 200.72 | 498.5865 | 1477.751 | 15.9941  | 0.5   | 5.88 | 81122.9  | 9.05  | HUMAN | H3BL28 | Probable ATP-dependent RNA helicase DXD17                                        |
| 24094 | dirMS_041712_NAR_20mM_plus.19302.19302.3   | 3 | 3.94 | 0 | 2.70E+05 |         | (R)MLAQTP(R)A G T O P / E V L / E A / V A / Q / R I S)         | mDnaE2 methionine            | 204.33 | 541.9731 | 1623.906 | -0.0017  | -1    | 4.53 | 118390.9 | 4.49  | HUMAN | P23214 | Ubiquitin-like modifier-activating enzyme 1                                      |
| 24095 | dirMS_041712_NAR_30mM_plus.11497.11497.2   | 3 | 3.94 | 0 | 2.32E+05 |         | (R)MNEVW(R)M E I / M E / A A O V D / K I Q)                    | mDnaE2 methionine            | 113.63 | 532.7609 | 1084.512 | 0.0003   | 2.9   | 4.37 | 9475.6   | 5.64  | HUMAN | J3K055 | Cytosolic non-specific dipeptidase (Fragment)                                    |
| 24096 | dirMS_041712_NAR_40mM_plus.6193.6193.2     | 3 | 3.94 | 0 | 1.96E+05 |         | (R)TESEVW(R)E T / L / L / M / N / R / A / K I Q)               | mDnaE2 methionine            | 96.27  | 490.2282 | 979.451  | -0.002   | -4.2  | 4.53 | 37302.8  | 5.1   | HUMAN | Q13047 | Keratin, type I cytoskeletal 8                                                   |
| 24097 | dirMS_041712_NAR_40mM_plus.8028.8028.2     | 3 | 3.94 | 0 | 2.11E+05 |         | (R)KVALVS(K)V A V L I S / Q N R T)                             | mDnaE2 methionine            | 108.22 | 443.7528 | 886.51   | -0.0122  | -13.7 | 9.72 | 45212.4  | 9.41  | HUMAN | B72233 | Acetyl-CoA acetyltransferase, cytosolic                                          |
| 24098 | dirMS_041712_NAR_50mM_plus.13100.13100.3   | 3 | 3.94 | 1 | 9.64E+05 |         | (R)QASLAETL(K)S / I / L A / E T D V K T I V A A K I L)         | mDnaE2 methionine            | 137.32 | 530.2925 | 1588.879 | -0.0163  | -10.2 | 4.68 | 65077.2  | 5.47  | HUMAN | B72185 | V-type proton ATPase catalytic subunit A                                         |
| 24099 | dirMS_041712_NAR_50mM_plus.21193.21193.3   | 3 | 3.94 | 1 | 4.45E+05 | M145m   | (R)GVMLA(R)G V I M / L A V D / V / I / E L K K I Q)            | mDnaE2 methionine            | 181.6  | 524.9717 | 1556.908 | 15.9925  | -1.5  | 6.07 | 25252.7  | 9.52  | HUMAN | E7F9H4 | 60 kDa heat shock protein, mitochondrial (Fragment)                              |
| 24100 | dirMS_041712_NAR_50mM_plus.26667.6667.3    | 3 | 3.94 | 2 | 1.50E+05 | S78r    | (R)EVKAKK(R)E V L K K E I G V A T M E I)                       | lNucleosidomethylation (U-A) | 100.83 | 485.0164 | 1121.611 | 79.9561  | -7    | 6.24 | 19990.2  | 4.95  | HUMAN | B4D735 | Bi-functional methyltetrahydrofolate dehydrogenase/cyclohydrolase, mitochondrial |
| 24101 | dirMS_041712_NAR_50mM_plus.7024.7024.3     | 3 | 3.94 | 1 | 1.15E+04 | T228r   | (R)HTAEK(R)H / A / E / K / V / E / K / I Q)                    | mDnaE2 methionine            | 102.95 | 528.2459 | 1379.662 | 203.6008 | -11.8 | 6.75 | 75164.1  | 9.88  | HUMAN | B7Q2M2 | Zinc finger protein 555                                                          |
| 24102 | dirMS_041712_NAR_50mM_plus.7939.7939.3     | 3 | 3.94 | 1 | 3.43E+04 | M250m   | (K)ITTD(K)K I T / D / m / P A S K E T E M A L A / K I D)       | mDnaE2 methionine            | 108.27 | 580.6104 | 1723.824 | 15.9925  | -1.4  | 4.68 | 85679.3  | 7.65  | HUMAN | B82V81 | Microtubule-associated protein                                                   |
| 24103 | dirMS_041712_NAR_50mM_plus.15416.15416.3   | 3 | 3.94 | 1 | 2.83E+05 |         | (K)MLNVTYR(K)N L K T V P A S Q K I L)                          | mDnaE2 methionine            | 137.35 | 400.2383 | 1198.715 | -0.0151  | -12.6 | 10   | 46651.1  | 6.62  | HUMAN | FG5K11 | B-cell linker protein                                                            |
| 24104 | dirMS_041712_NAR_60mM_plus.20358.20358.3   | 3 | 3.94 | 1 | 3.74E+04 | M354m   | (K)LLNQLK(R)N L Q L E A R E I I K I M I Q)                     | mDnaE2 methionine            | 166.93 | 453.9368 | 1343.772 | 16.0243  | 21.6  | 6.14 | 50534.1  | 8.72  | HUMAN | Q5V4S2 | Spermatogenesis-associated protein 1                                             |
| 24105 | dirMS_041712_NAR_60mM_plus.20917.20917.3   | 3 | 3.94 | 1 | 1.34E+05 |         | (K)FTYNTI(K)T F / V / N / T P A E V G I V V V G D K R I S)     | mDnaE2 methionine            | 176.0  | 639.0248 | 1915.065 | -0.0049  | -2.6  | 5.74 | 17630.6  | 11.62 | HUMAN | IL3D35 | Profilin-1 (Fragment)                                                            |
| 24106 | dirMS_041712_NAR_60mM_plus.6737.6737.3     | 3 | 3.94 | 1 | 1.11E+06 |         | (R)NTEEEG(R)N T I E / E G L K V K I S)                         | mDnaE2 methionine            | 93.37  | 404.2017 | 1210.595 | -0.0045  | -3.7  | 4.79 | 83344.9  | 10.18 | HUMAN | EP9K09 | Bcl-2-associated transcription factor 1 (Fragment)                               |
| 24107 | dirMS_041712_NAR_60mM_plus.9851.9851.3     | 3 | 3.94 | 0 | 7.13E+05 |         | (R)IQDEGFR(R)Q Q I E G / F / K / P / N Y M E N R I E)          | mDnaE2 methionine            | 109.4  | 547.5879 | 1640.749 | 0.0006   | 0.4   | 6.14 | 58856.7  | 6.26  | HUMAN | B8WX11 | Paraspeckle component 1                                                          |
| 24108 | dirMS_041712_NAR_120mM_minus.12082.12082.3 | 3 | 3.93 | 1 | 2.55E+06 |         | (R)NLKASLI(R)K A S L E / L N S / L R I E)                      | lNucleosidomethylation (T)   | 115.55 | 415.5698 | 1244.896 | -0.0009  | -0.7  | 8.75 | 43773.3  | 5.26  | HUMAN | H8V219 | Keratin, type I cytoskeletal 18                                                  |
| 24109 | dirMS_041712_NAR_120mM_minus.5065.5065.3   | 3 | 3.93 | 1 | 6.76E+04 | F528r   | (K)KFMDS(K)F A / V / D / S I / G I I K I Q)                    | lNucleosidomethylation (T)   | 78.53  | 401.8604 | 1123.611 | 79.9561  | -5    | 10   | 71017.4  | 6.89  | HUMAN | Q33923 | Zinc finger protein 85                                                           |
| 24110 | dirMS_041712_NAR_20mM_minus.10398.10398.2  | 2 | 3.93 | 0 | 4.24E+04 |         | (K)KVALVSI(K)K A V L S / L V / A S G R I T)                    | mDnaE2 methionine            | 152.4  | 518.7299 | 1035.679 | 0        | 0     | 8.79 | 14579.3  | 5.13  | HUMAN | K7EM38 | Actin, cytoplasmic 2, N-terminally processed (Fragment)                          |
| 24111 | dirMS_041712_NAR_30mM_minus.15337.15337.2  | 2 | 3.93 | 0 | 4.97E+05 | M22m89  | (K)MISYQA(K)M S I V / I G A M W K I Q)                         | mDnaE2 methionine            | 136.03 | 587.2756 | 1557.548 | 15.9957  | 0.7   | 8.34 | 266161.  | 5.68  | HUMAN | EP9PUD | Epiplakin                                                                        |
| 24112 | dirMS_041712_NAR_30mM_minus.18722.18722.2  | 2 | 3.93 | 0 | 2.63E+05 |         | (K)PYLQPL(R)P Q I / L L P / G V I Q I K I Q)                   | mDnaE2 methionine            | 156.17 | 528.816  | 1058.629 | -0.0045  | -4.4  | 8.75 | 45238.3  | 6.03  | HUMAN | FSH737 | Adenosylhomocysteinase                                                           |
| 24113 | dirMS_041712_NAR_30mM_minus.7288.7288.2    | 2 | 3.93 | 0 | 2.48E+05 | T83r    | (K)RQVQV(R)K V I / L / L / V / S / V / G I I K I Q)            | lNucleosidomethylation (T)   | 91.93  | 421.2    | 761.391  | 89.881   | 6.8   | 6.14 | 11414.1  | 6.88  | HUMAN | Q13047 | Keratin, type I cytoskeletal 8                                                   |
| 24114 | dirMS_041712_NAR_40mM_minus.14595.14595.3  | 3 | 3.93 | 1 | 9.76E+04 |         | (K)PLQSPYR(R)K L P S I P / L V P / A / S / Q / K I R I Q)      | mDnaE2 methionine            | 166.73 | 530.6703 | 1598.999 | -0.0025  | -1.6  | 10   | 34958.1  | 9.42  | HUMAN | Q15785 | Midochondrial import receptor subunit TOM34                                      |
| 24115 | dirMS_041712_NAR_40mM_minus.15860.15860.3  | 3 | 3.93 | 0 | 5.07E+05 | M466m   | (R)QLPVS(R)Q L P / Q / V / L M S E L L N R I Q)                | mDnaE2 methionine            | 184.62 | 551.1011 | 1677.911 | 16.0083  | 7.9   | 6.75 | 121344.2 | 5.76  | HUMAN | B4D0M1 | Helicase SK02W                                                                   |
| 24116 | dirMS_041712_NAR_50mM_plus.6744.6744.3     | 3 | 3.93 | 1 | 3.56E+04 | M108m   | (K)MLPPDR(K)M P P D R / V A / E K I Q)                         | mDnaE2 methionine-trk-like   | 104.72 | 462.9052 | 1256.667 | 130.0433 | -2.5  | 6.07 | 294551.9 | 5.56  | HUMAN | Q00007 | Probable ubiquitin carboxyl-terminal hydrolase FAF-V                             |
| 24117 | dirMS_041712_NAR_50mM_plus.10519.10519.3   | 3 | 3.93 | 1 | 2.11E+05 |         | (R)KIDGDF(R)K V I / L / L / V / S / V / G I I K I Q)           | mDnaE2 methionine            | 112.48 | 523.7882 | 1479.722 | 20.0029  | 13.2  | 9.42 | 53123.6  | 6.88  | HUMAN | Q2H060 | Elongation factor 1-alpha (Fragment)                                             |
| 24118 | dirMS_041712_NAR_60mM_plus.9896.9896.3     | 3 | 3.93 | 1 | 2.88E+05 |         | (R)KIDGDF(R)K L D / P / S / E / A / G T / Q / T / V R I Q)     | mDnaE2 methionine            | 114.75 | 524.9451 | 1573.823 | -0.002   | -11.3 | 4.68 | 56491.1  | 7.78  | HUMAN | B4D7C2 | Elongation factor 1 gamma                                                        |
| 24119 | dirMS_041712_NAR_60mM_plus.10734.10734.2   | 2 | 3.93 | 1 | 4.55E+04 |         | (R)FGVNTS(R)F G I V / T / S / A / G / T / T T E D T E A K I Q) | mDnaE2 methionine            | 146.4  | 936.4446 | 1871.887 | -0.005   | -2.7  | 4.14 | 59643.8  | 9.11  | HUMAN | HY0HGO | Uncharacterized protein (Fragment)                                               |
| 24120 | dirMS_041712_NAR_20mM_plus.16590.16590.3   | 3 | 3.93 | 0 | 5.30E+04 | M22m110 | (R)ALPTE(R)R L A T V / P / E L / T / Q / M / F D / A I K I Q)  | mDnaE2 methionine            | 185.5  | 569.9583 | 1691.867 | 15.9931  | -1.1  | 4.37 | 42831.5  | 4.86  | HUMAN | AK854  | HCG19830A, isoform CRA_f                                                         |
| 24121 | dirMS_041712_NAR_20mM_plus.16739.16739.2   | 2 | 3.93 | 0 | 1.22E+05 |         | (K)JFAPMTA(K)M I / A / F / T / A / T I K I Q)                  | mDnaE2 methionine            | 185.87 | 474.2987 | 947.592  | -0.0023  | -2.4  | 8.75 | 17718.4  | 10.99 | HUMAN | PE2269 | 40S ribosomal protein S18                                                        |
| 24122 | dirMS_041712_NAR_20mM_plus.8316.8316.2     | 2 | 3.93 | 0 | 3.67E+04 | M130m   | (R)EESDQD(R)E S L Q / I G / A E I V I Q I K I Q)               | mDnaE2 methionine            | 127.77 | 654.3208 | 1291.631 | 16.0029  | 6.4   | 4.53 | 18719.5  | 6.02  | HUMAN | K7E170 | Glucosylase 2-subunit beta (Fragment)                                            |
| 24123 | dirMS_041712_NAR_30mM_plus.21648.21648.3   | 3 | 3.93 | 0 | 1.76E+05 | N7m     | (L)MAASV(L)M A V S V L V L T / V L R I Q)                      | nAcetylglucosamine (N)       | 169.22 | 458.9204 | 1174.661 | 203.0854 | 4.4   | 9.5  | 14276.1  | 10.12 | HUMAN | B4D7G6 | 28S ribosomal protein S18B, mitochondrial                                        |
| 24124 | dirMS_041712_NAR_30mM_plus.6221.6221.2     | 2 | 3.93 | 0 | 1.91E+05 | M166m   | (R)IMSGFR(R)M G I / S / F / V / G M I Q)                       | mDnaE2 methionine            | 86.63  | 422.6944 | 828.374  | 16.0073  | 14.6  | 8.5  | 57391.2  | 6.29  | HUMAN | DA3175 | D-3-phosphoglycerate dehydrogenase                                               |
| 24125 | dirMS_041712_NAR_40mM_plus.11493.11493.3   | 3 | 3.93 | 1 | 4.38E+04 |         | (K)IDVDEA(K)M V D E / A Y M N V E L F E S R I L)               | mDnaE2 methionine            | 133.62 | 599.9504 | 1797.832 | 30.043   | 2.4   | 4.18 | 13588.1  | 4.66  | HUMAN | F8V767 | Keratin, type I cytoskeletal 8 (Fragment)                                        |
| 24126 | dirMS_041712_NAR_50mM_plus.12847.12847.3   | 3 | 3.93 | 0 | 2.25E+05 |         | (R)YVYVTD(K)K V I / L / L / V / S / V / G I I K I Q)           | mDnaE2 methionine            | 104.72 | 462.9052 | 1256.667 | 130.0433 | -2.5  | 6.07 | 294551.9 | 5.56  | HUMAN | Q00007 | Probable ubiquitin carboxyl-terminal hydrolase FAF-V                             |
| 24127 | dirMS_041712_NAR_50mM_plus.21581.21581.3   | 3 | 3.93 | 1 | 9.83E+04 | T400T   | (K)RTVQAP(R)T V I L Q P K K V L M E / F T A / G I K I Q)       | lNucleosidomethylation (T)   | 184.16 | 564.7888 | 1612.963 | 79.9546  | -4.6  | 9.7  | 65505.1  | 11.62 | HUMAN | B72339 | Enucleonase 3'-5' domain-containing protein                                      |
| 24128 | dirMS_041712_NAR_60mM_plus.11069.11069.2   | 2 | 3.93 | 1 | 6.40E+05 |         | (K)IDVQDF(R)Q L E G V / K / G / P / D / A R I E)               | mDnaE2 methionine            | 115.55 | 560.8612 | 1480.718 | -0.0028  | -1.9  | 6.07 | 43979.5  | 8.92  | HUMAN | FSVZ13 | Non-POU domain-containing octamer-binding protein                                |
| 24129 | dirMS_041712_NAR_60mM_plus.19997.19997.3   | 3 | 3.93 | 1 | 3.34E+05 |         | (K)QGVREK(K)P P V R E / D / V / I / T / A L E S E R I E)       | mDnaE2 methionine            | 165.02 | 599.8885 | 1769.939 | -0.0083  | -4.7  | 4.41 | 7898     | 11.1  | HUMAN | PE2857 | 40S ribosomal protein S28                                                        |
| 24130 | dirMS_041712_NAR_60mM_plus.16266.16266.3   | 3 | 3.93 | 1 | 4.17E+05 |         | (K)S6MDE(K)K N D E /                                           |                              |        |          |          |          |       |      |          |       |       |        |                                                                                  |



|       |                                            |   |      |   |          |        |                                                      |                               |        |          |          |          |       |      |          |             |        |                                                                      |
|-------|--------------------------------------------|---|------|---|----------|--------|------------------------------------------------------|-------------------------------|--------|----------|----------|----------|-------|------|----------|-------------|--------|----------------------------------------------------------------------|
| 24303 | dirMS_041712_NAR_30mM_minus.16597.16597.2  | 2 | 3.87 | 0 | 2.57E+05 | M2243m | (K)ImSfYQA (K)M S I V Q A M W K(G)                   | m.Oxidized methionine         | 144.07 | 587.2756 | 1157.548 | 15.9957  | 0.7   | 8.34 | 266161   | 5.68 HUMAN  | EPSPDU | Epilakin                                                             |
| 24304 | dirMS_041712_NAR_40mM_minus.11450.11450.3  | 3 | 3.87 | 0 | 1.98E+05 |        | (K)LVYSGK (K) V I V S G D V V N H D P V P V G D R(L) | m.Oxidized methionine         | 150.4  | 631.3335 | 1891.987 | -0.0013  | -2.7  | 4.41 | 27786.2  | 5.93 HUMAN  | HD0426 | Phosphorylase (Fragment)                                             |
| 24305 | dirMS_041712_NAR_40mM_minus.12314.12314.3  | 3 | 3.87 | 1 | 1.79E+04 |        | (K)LVYSGK (K) V I V S G D V V N H D P V P V G D R(L) | m.Oxidized methionine         | 155.1  | 611.2444 | 1835.958 | -0.0008  | -2.1  | 4.41 | 80061.1  | 5.93 HUMAN  | HD0426 | Phosphorylase (Fragment)                                             |
| 24306 | dirMS_041712_NAR_40mM_minus.12407.12407.3  | 3 | 3.87 | 1 | 1.79E+04 |        | (K)LVYSGK (K) V I V S G D V V N H D P V P V G D R(L) | m.Oxidized methionine         | 155.1  | 611.2444 | 1835.958 | -0.0008  | -2.1  | 4.41 | 80685.1  | 7.31 HUMAN  | PO5565 | Propionyl-CoA carboxylase alpha chain, mitochondrial                 |
| 24307 | dirMS_041712_NAR_40mM_minus.7999.7999.3    | 3 | 3.87 | 0 | 1.24E+05 | M147m  | (K)IQVMEK (K) Q V M E A P S I V V G T P R G(V)       | m.Oxidized methionine         | 127.7  | 519.4627 | 1618.873 | 15.9931  | -1.1  | 6.75 | 20895.9  | 4.85 HUMAN  | JK325  | Eukaryotic initiation factor 4A1 (Fragment)                          |
| 24308 | dirMS_041712_NAR_50mM_minus.10471.10471.3  | 3 | 3.87 | 0 | 1.28E+05 | M391m  | (K)AMhDHC (K)A M D V G S V S V P V V V K(D)          | m.Oxidized methionine         | 127.2  | 512.2182 | 1459.677 | 95.9627  | 0.9   | 4.21 | 58008.6  | 8.96 HUMAN  | Q57798 | Synaptotagmin-6                                                      |
| 24309 | dirMS_041712_NAR_50mM_minus.12215.12215.3  | 3 | 3.87 | 1 | 2.11E+04 |        | (K)QVSDVQ (K) V L V Q V K S D P F G L G R(LV)        | m.Oxidized methionine         | 137.68 | 514.3277 | 1846.799 | -0.0078  | -4.7  | 4.56 | 13802.7  | 6.91 HUMAN  | AKN26  | Protein phosphatase 1 isoform 3                                      |
| 24310 | dirMS_041712_NAR_50mM_minus.8815.8815.3    | 3 | 3.87 | 1 | 7.72E+04 |        | (R)SATSVT (R) S A T V T D V V N A E A K(Q)           | m.Oxidized methionine         | 118.25 | 506.6004 | 1517.811 | -0.0033  | -2.2  | 5.79 | 57301.2  | 6.29 HUMAN  | Q43175 | D-3-phosphoglycerate dehydrogenase                                   |
| 24311 | dirMS_041712_NAR_60mM_minus.11778.11778.2  | 2 | 3.87 | 1 | 3.16E+05 |        | (K)TIDDLK (K) I D D E D K L K I(Q)                   | m.Oxidized methionine         | 126.35 | 595.3185 | 1189.631 | -0.0013  | -1.1  | 4.22 | 33450.2  | 4.73 HUMAN  | JKN67  | Tropomyosin alpha-3 chain                                            |
| 24312 | dirMS_041712_NAR_60mM_minus.13485.13485.3  | 3 | 3.87 | 1 | 1.67E+05 |        | (R)IGAGTQ (R) G A G G G G L Q D V I V P S P R(K)     | m.Oxidized methionine         | 135.4  | 552.6388 | 1655.908 | -0.0057  | -3.4  | 8.75 | 258215.9 | 5.48 HUMAN  | EF7895 | Filamin-B                                                            |
| 24313 | dirMS_041712_NAR_60mM_minus.13860.13860.3  | 3 | 3.87 | 0 | 1.10E+05 | T1641  | (R)IEPATTI (R) I E P A T T A T A T K(T)              | n.Non-acylated methionine (I) | 130.2  | 450.254  | 1145.641 | 203.1262 | 19.9  | 5.66 | 113709.5 | 9.69 HUMAN  | BAD509 | Target of Nest-38?                                                   |
| 24314 | dirMS_041712_NAR_60mM_minus.5042.5042.3    | 3 | 3.87 | 1 | 3.90E+04 | M277m  | (K)KILGRR (K) V I V S G D V V N H D P V P V G D R(L) | m.Oxidized methionine         | 82.83  | 468.9977 | 1405.714 | -0.0016  | -4.4  | 4.68 | 9990.1   | 5.21 HUMAN  | Q96011 | Coatamer protein complex, subunit beta 2 (Beta prime), isoform CRA_B |
| 24315 | dirMS_041712_NAR_60mM_minus.6299.6299.2    | 2 | 3.87 | 1 | 8.32E+03 |        | (K)HAPPEK (K) I A P P E R K(Y)                       | m.Oxidized methionine         | 103.55 | 462.287  | 923.567  | -0.0006  | -0.6  | 8.75 | 32616.5  | 5.18 HUMAN  | AKN176 | Actin, alpha skeletal muscle                                         |
| 24316 | dirMS_041712_NAR_60mM_minus.7934.7934.3    | 3 | 3.87 | 0 | 8.63E+04 |        | (K)IQVQMA (K) Q V Q M A A T A V D A K(Q)             | m.Oxidized methionine         | 104.13 | 409.2199 | 1225.647 | -0.0019  | -1.5  | 9.75 | 35145.8  | 9.26 HUMAN  | Q00403 | Transcription initiation factor IIIB                                 |
| 24317 | dirMS_041712_NAR_60mM_minus.8100.8100.3    | 3 | 3.87 | 1 | 8.45E+04 |        | (K)VDATK (K) V D A T A E T D L A K(R/F)              | m.Oxidized methionine         | 105.18 | 430.5619 | 1289.672 | -0.0016  | -1.7  | 5.86 | 73373.4  | 4.96 HUMAN  | PL3467 | Protein disulfide-isomerase A4                                       |
| 24318 | dirMS_041712_NAR_120mM_plus.590.590.3      | 3 | 3.87 | 1 | 3.09E+05 |        | (K)VTYGGK (K) V T V G Q E R L E R(Q)                 | m.Oxidized methionine         | 83.33  | 448.6234 | 1344.687 | -0.0075  | -5.6  | 4.79 | 9016.8   | 5.52 HUMAN  | CI1363 | Transcription intermediary factor 1-beta                             |
| 24319 | dirMS_041712_NAR_20mM_plus.13234.13234.2   | 2 | 3.87 | 0 | 6.37E+04 |        | (R)GGDGG (R) G G G D V V P R P(R)                    | m.Oxidized methionine         | 163.3  | 540.311  | 1079.621 | -0.0018  | -1.2  | 5.84 | 73399.3  | 6.86 HUMAN  | Q29245 | FR upstream element-binding protein 2                                |
| 24320 | dirMS_041712_NAR_20mM_plus.13792.13792.2   | 2 | 3.87 | 0 | 6.76E+03 | K305k  | (R)NSLNAE (R) S N L N A E K R(L)                     | l.Lysine-k6                   | 167.37 | 515.7856 | 916.521  | 114.0429 | -0.1  | 8.46 | 134915.9 | 5.4 HUMAN   | Q6AWC2 | Protein WW22                                                         |
| 24321 | dirMS_041712_NAR_20mM_plus.15843.15843.2   | 2 | 3.87 | 1 | 1.19E+05 |        | (K)LDLPRP (K) L D L P R E A E F A A S R(E)           | m.Oxidized methionine         | 180.08 | 377.8794 | 1474.765 | -0.0133  | -9    | 4.68 | 21283.1  | 6.74 HUMAN  | Q6A428 | Beta-ureidopropionase                                                |
| 24322 | dirMS_041712_NAR_30mM_plus.12777.12777.2   | 2 | 3.87 | 0 | 5.63E+05 |        | (R)CNVNV (R) C N V N V A L P R(I)                    | m.Oxidized methionine         | 120.8  | 526.2726 | 1051.535 | 0.0026   | 2.5   | 8.75 | 9792.1   | 4.7 HUMAN   | RS2306 | Small nuclear ribonucleoprotein F                                    |
| 24323 | dirMS_041712_NAR_30mM_plus.15656.15656.2   | 2 | 3.87 | 0 | 2.83E+05 |        | (R)IMAGAR (R) I M A G A R Q A V A Q L U R(A)         | m.Oxidized methionine         | 134.38 | 550.816  | 1100.624 | 0.0002   | 0.2   | 9.5  | 4445.1   | 11.42 HUMAN | FRW10  | Pyruvate-5-carboxylase reductase 3                                   |
| 24324 | dirMS_041712_NAR_30mM_plus.17602.17602.3   | 3 | 3.87 | 0 | 7.33E+05 |        | (R)JASLEAA (R) J A S L E A A A A D A A Q C(Q)        | m.Oxidized methionine         | 144.93 | 448.8963 | 1344.675 | -0.001   | -0.8  | 4.4  | 56607.4  | 5.37 HUMAN  | FRV84A | Keratin, type II cytoskeletal 8                                      |
| 24325 | dirMS_041712_NAR_30mM_plus.25842.5842.2    | 2 | 3.87 | 0 | 3.59E+04 | M119m  | (R)NVTMQ (K) N V T M Q N L N D R(L)                  | m.Oxidized methionine         | 84.63  | 553.7615 | 1090.531 | 15.9848  | -9.2  | 5.81 | 51902.9  | 5.09 HUMAN  | PO2533 | Keratin, type I cytoskeletal 14                                      |
| 24326 | dirMS_041712_NAR_40mM_plus.10373.10373.2   | 2 | 3.87 | 0 | 2.39E+04 |        | (R)CNVNV (R) C N V N V A L P R(I)                    | m.Oxidized methionine         | 125.85 | 526.2705 | 1051.535 | -0.0016  | -1.5  | 8.75 | 9792.1   | 4.7 HUMAN   | RS2306 | Small nuclear ribonucleoprotein F                                    |
| 24327 | dirMS_041712_NAR_40mM_plus.6403.6403.2     | 2 | 3.87 | 0 | 1.23E+04 |        | (R)VYSASR (R) V Y S A S R G S A R(L)                 | m.Oxidized methionine         | 96.83  | 515.2719 | 1037.537 | -0.0009  | -0.9  | 8.75 | 26744.2  | 7.15 HUMAN  | FRW10  | Pyruvate-5-carboxylase 1 (Fragment)                                  |
| 24328 | dirMS_041712_NAR_40mM_plus.9063.9063.2     | 2 | 3.87 | 0 | 5.32E+05 |        | (K)SSFFSR (K) S F F S R D V(G)                       | m.Oxidized methionine         | 116.18 | 423.1935 | 845.379  | 0.0009   | 1.1   | 5.55 | 15031.5  | 6.72 HUMAN  | B4D140 | ATP-dependent RNA helicase DDX3X                                     |
| 24329 | dirMS_041712_NAR_50mM_plus.12350.12350.3   | 3 | 3.87 | 0 | 3.32E+05 |        | (R)IVRVCV (R) V R V R C V V G Q A D V L Q Q L V R(D) | m.Oxidized methionine         | 133.12 | 629.9955 | 1887.986 | -0.0138  | -7.3  | 8.71 | 73386.6  | 8.73 HUMAN  | B4DX77 | ATP-dependent RNA helicase DDX3Y                                     |
| 24330 | dirMS_041712_NAR_50mM_plus.13886.13886.3   | 3 | 3.87 | 0 | 6.08E+05 |        | (K)EGAPTK (K) E G A P T K I E I D D P F L F R(Q)     | m.Oxidized methionine         | 140.68 | 615.9744 | 1845.912 | -0.0013  | -1.6  | 4.08 | 29941.1  | 9.04 HUMAN  | Q75937 | DnaJ homology subfamily C member 8                                   |
| 24331 | dirMS_041712_NAR_50mM_plus.18963.18963.3   | 3 | 3.87 | 0 | 3.08E+05 |        | (K)KILGRR (K) V I V S G D V V N H D P V P V G D R(L) | m.Oxidized methionine         | 103.55 | 462.287  | 923.567  | -0.0006  | -0.6  | 8.75 | 32616.5  | 5.21 HUMAN  | AKN176 | Actin, alpha skeletal muscle                                         |
| 24332 | dirMS_041712_NAR_50mM_plus.2916.2916.3     | 3 | 3.87 | 0 | 2.07E+05 |        | (R)NLPTEP (R) N P L T E P D T D N L K(L)             | m.Oxidized methionine         | 108.78 | 527.645  | 1580.778 | 0.0187   | 11.8  | 3.91 | 77604    | 5.92 HUMAN  | AK3264 | Centromere/kinetochore protein zw1 homolog                           |
| 24333 | dirMS_041712_NAR_50mM_plus.8227.8227.3     | 3 | 3.87 | 0 | 1.28E+03 |        | (K)QLAAV (K) Q L A V A E L G K P P A E R(K)          | m.Oxidized methionine         | 109.72 | 473.9327 | 1434.795 | -0.0086  | -6    | 6.14 | 24364.9  | 9.64 HUMAN  | HD190  | Methionine-tRNA ligase, cytoplasmic (Fragment)                       |
| 24334 | dirMS_041712_NAR_50mM_plus.12393.12393.3   | 3 | 3.87 | 1 | 6.87E+05 |        | (K)GQSGE (K) G Q S G E V V V V K D R(E)              | m.Oxidized methionine         | 149.7  | 497.9427 | 1491.817 | -0.003   | -2    | 6.07 | 28815.3  | 9.52 HUMAN  | B4E22  | Cold-inducible RNA-binding protein                                   |
| 24335 | dirMS_041712_NAR_50mM_plus.2198.2198.3     | 3 | 3.87 | 1 | 2.98E+05 |        | (R)GDLGRG (R) G D L G R G V L E A V P T R(R)         | m.Oxidized methionine         | 126.57 | 585.2935 | 1843.319 | -0.0056  | -3.5  | 8.75 | 15252.3  | 6.45 HUMAN  | AKN605 | Ubiquitin-protein ligase E3, isoform CRA_A                           |
| 24336 | dirMS_041712_NAR_60mM_plus.8803.8803.3     | 3 | 3.87 | 1 | 5.73E+05 |        | (K)ELSPRFE (K) E L S P R F E G E K S I               | m.Oxidized methionine         | 104.43 | 445.8862 | 1335.643 | 0.0014   | 1.1   | 4.41 | 84557.3  | 6.5 HUMAN   | Q04609 | Glutamate carboxypeptidase 2                                         |
| 24337 | dirMS_041712_NAR_120mM_minus.16226.16226.4 | 4 | 3.86 | 1 | 1.16E+05 | K177k  | (K)RIEFHFK (K) R I E F H K G V G V Y P A K(E)        | l.Lysine-k6                   | 141.63 | 457.499  | 1712.923 | 114.0511 | -4.5  | 9.7  | 38247.2  | 5.48 HUMAN  | CFJ58  | Protein OSCP1                                                        |
| 24338 | dirMS_041712_NAR_120mM_minus.17981.17981.3 | 3 | 3.86 | 0 | 6.88E+04 |        | (R)IGNPNA (R) I G N P N A E G S F T S R(L)           | m.Oxidized methionine         | 153.5  | 474.2316 | 1420.681 | -0.0013  | -0.9  | 6    | 78489.2  | 9.18 HUMAN  | Q9Y252 | E3 ubiquitin-protein ligase RNF6                                     |
| 24339 | dirMS_041712_NAR_120mM_minus.20076.20076.3 | 3 | 3.86 | 0 | 2.72E+05 |        | (K)HVLGVL (K) H V L G V L G D V L T T G K(K)         | m.Oxidized methionine         | 166.13 | 483.5866 | 1298.747 | -0.0015  | -1.1  | 6.71 | 13048.7  | 6.42 HUMAN  | CH2405 | Eukaryotic translation initiation factor 5A-2 (Fragment)             |
| 24340 | dirMS_041712_NAR_30mM_minus.7292.7292.2    | 2 | 3.86 | 0 | 5.49E+05 |        | (R)IQDQNP (R) I Q D Q N P D V A Q R(L)               | m.Oxidized methionine         | 94.5   | 496.7534 | 902.468  | -0.0048  | -4.9  | 4.21 | 28545.1  | 4.5 HUMAN   | CF7189 | Actin (Fragment)                                                     |
| 24341 | dirMS_041712_NAR_40mM_minus.12367.12367.3  | 3 | 3.86 | 0 | 7.12E+04 |        | (R)YVAPLE (R) Y V A L P E L D V E L V P R K(M)       | m.Oxidized methionine         | 156.23 | 533.9726 | 1599.899 | 0.004    | 2.5   | 4.68 | 69862.6  | 5.58 HUMAN  | B4D68A | Plastin-3                                                            |
| 24342 | dirMS_041712_NAR_50mM_minus.10102.10102.3  | 3 | 3.86 | 0 | 9.10E+04 |        | (R)GVPEAP (R) G V P E A P V A L S E V E R K(L)       | m.Oxidized methionine         | 125.42 | 519.2824 | 1555.833 | 0.0      | 0     | 4.49 | 8516.9   | 5.1 HUMAN   | EP918  | Splicing factor 3B subunit 2 (Fragment)                              |
| 24343 | dirMS_041712_NAR_50mM_minus.13875.13875.3  | 3 | 3.86 | 1 | 1.99E+05 |        | (R)YLVYTL (R) Y L V Y T L V T E V R A G(K)           | m.Oxidized methionine         | 147.38 | 495.9437 | 1485.82  | -0.0034  | -2.3  | 6.07 | 7621.9   | 10.1 HUMAN  | JKT73  | 60S ribosomal protein L38                                            |
| 24344 | dirMS_041712_NAR_50mM_minus.11872.11872.3  | 3 | 3.86 | 1 | 1.25E+05 |        | (R)EYVYSL (R) E Y V Y S L G G S R(L)                 | m.Oxidized methionine         | 126.57 | 585.2935 | 1843.319 | -0.0056  | -3.5  | 8.75 | 15252.3  | 6.45 HUMAN  | AKN605 | Ubiquitin-protein ligase E3, isoform CRA_A                           |
| 24345 | dirMS_041712_NAR_120mM_plus.23534.23534.3  | 3 | 3.86 | 0 | 3.27E+05 |        | (R)EFPWFR (R) E P W F R P P A A S F P R L(T)         | m.Oxidized methionine         | 178.6  | 540.9492 | 1620.853 | -0.0022  | -12.5 | 6    | 23836.8  | 11.9 HUMAN  | GE5845 | Myosin-associated oligonucleotide basic protein                      |
| 24346 | dirMS_041712_NAR_120mM_plus.5313.5313.3    | 3 | 3.86 | 1 | 1.54E+05 |        | (R)INDDEO (R) I N D D E O E A A R E R(R)             | m.Oxidized methionine         | 81.02  | 483.5401 | 1448.588 | 0.0173   | 12    | 3.95 | 14448.1  | 5.66 HUMAN  | CH813  | Caldesmon (Fragment)                                                 |
| 24347 | dirMS_041712_NAR_120mM_plus.5638.5638.2    | 2 | 3.86 | 0 | 1.20E+05 |        | (R)HNVPSF (R) H N V I V F S G S R(L)                 | m.Oxidized methionine         | 82.4   | 473.2482 | 945.49   | -0.001   | -1    | 9.75 | 17802.1  | 10.98 HUMAN | Q8N518 | Ribonuclease P protein subunit p25-like protein                      |
| 24348 | dirMS_041712_NAR_20mM_plus.16862.16862.3   | 3 | 3.86 | 0 | 3.42E+05 |        | (K)R55S (K) R 55 S D N T P S 1552.861                | m.Oxidized methionine         | 187.55 | 516.2975 | 1552.861 | -0.0026  | -4.7  | 5.97 | 10728.1  | 9.15 HUMAN  | Q9H514 | Mitochondrial import inner membrane translocase subunit Tim13        |
| 24349 | dirMS_041712_NAR_20mM_plus.6419.6419.2     | 2 | 3.86 | 0 | 2.42E+04 |        | (R)SDSAAV (R) S D S A A V P T S T S T S R(A)         | m.Oxidized methionine         | 107.12 | 784.3802 | 1567.756 | -0.0027  | -1.7  | 9.47 | 42437.8  | 4.97 HUMAN  | Q13186 | Proteasomal ubiquitin receptor ADRM1                                 |
| 24350 | dirMS_041712_NAR_20mM_plus.7927.7927.2     | 2 | 3.86 | 0 | 6        |        |                                                      |                               |        |          |          |          |       |      |          |             |        |                                                                      |

|       |                                            |   |      |   |           |                                                    |        |          |          |          |       |         |          |       |       |                                        |                                                             |
|-------|--------------------------------------------|---|------|---|-----------|----------------------------------------------------|--------|----------|----------|----------|-------|---------|----------|-------|-------|----------------------------------------|-------------------------------------------------------------|
| 24412 | dirMS_041712_NAR_20mM_plus.12405.12405.2   | 2 | 3.84 | 0 | 5.73E-04  | (KILLQVLE)(K) L(L) V(L) E(D/R)G                    | 157.63 | 493.2863 | 985.568  | -0.0023  | -2.4  | 4.37    | 61018.6  | 9.44  | HUMAN | B4DLW8                                 | Probable ATP-dependent RNA helicase DDX5                    |
| 24413 | dirMS_041712_NAR_20mM_plus.5978.5978.3     | 3 | 3.84 | 0 | 1.02E+06  | M295M (R)IN(Q)M(R)Q(G) Q(Q) A(M)G(A)M(G) V(N)N(R)G | 100.27 | 534.8861 | 1558.67  | 63.7473  | -3.4  | 9.5     | 43979.5  | 8.82  | HUMAN | FSQ23                                  | Non-POU domain-containing octamer-binding protein           |
| 24414 | dirMS_041712_NAR_20mM_plus.7656.7656.2     | 2 | 3.84 | 0 | 2.07E+05  | M423M (K)A(L)D(E)K(V)A(L)M(Q)D(L)E                 | 128.57 | 430.7618 | 901.843  | 15.9239  | -1.7  | 6.1     | 4112.7   | 7.17  | HUMAN | PH3                                    | Phosphoglycerate kinase                                     |
| 24415 | dirMS_041712_NAR_20mM_plus.7515.7515.2     | 2 | 3.84 | 0 | 3.59E+05  | M239M (K)E(V)D(E)M(Q)G(V)N(V)N(K)N                 | 129.95 | 539.4455 | 1048.68  | 15.9504  | -3.1  | 4.14    | 40669.4  | 8.83  | HUMAN | FEVW1                                  | Tubulin beta chain                                          |
| 24416 | dirMS_041712_NAR_20mM_plus.9654.9654.2     | 2 | 3.84 | 0 | 6.07E+04  | M465M (K)V(L)D(M)G(L)P(T)G(A)E(G)R(D)              | 138.02 | 730.3568 | 1443.726 | 15.9083  | -1.0  | 4.37    | 96205.6  | 9.06  | HUMAN | SE95M5                                 | Interleukin enhancer binding factor 3, 90kDa, isoform CRA_b |
| 24417 | dirMS_041712_NAR_20mM_plus.9857.9857.2     | 2 | 3.84 | 0 | 1.691E+04 | (RIADTQ)(R)K(A)Q(T)Q(G)P(V)K(A)E(T)P(K)A           | 140.02 | 677.8702 | 1354.733 | 0.0006   | 0.5   | 8.64    | 149260.3 | 11.04 | HUMAN | EP80E                                  | Uncharacterized protein KIAA1583                            |
| 24418 | dirMS_041712_NAR_20mM_plus.16407.16407.3   | 3 | 3.84 | 0 | 5.50E+05  | (R)GGCA(M)R(K)A(L)Q(A)G(A)G(F)S(R)T                | 138.52 | 430.7618 | 1288.626 | 0.0005   | 0.3   | 6.5     | 16529.2  | 9.38  | HUMAN | EP945                                  | 40S ribosomal protein S21                                   |
| 24419 | dirMS_041712_NAR_30mM_plus2.19806.19806.2  | 2 | 3.84 | 0 | 1.24E+04  | (R)SMFM(L)R(L)Q(V)I(V)G(K)K                        | 153.5  | 405.8019 | 990.598  | -0.0017  | -1.7  | 8.75    | 29825.4  | 10.37 | HUMAN | PRZ01                                  | 40S ribosomal protein S4, X isoform                         |
| 24420 | dirMS_041712_NAR_40mM_plus2.8936.8936.3    | 3 | 3.84 | 1 | 1.79E+03  | T105T (R)DH(W)W(R)H(W)V(F)G(G)K(N)R(U)T(V)L(-)     | 113.99 | 597.3016 | 1586.833 | 203.0577 | -12.1 | 6.74    | 12361.3  | 4.91  | HUMAN | PO6317                                 | Ig lambda chain V-V1 region SU2                             |
| 24421 | dirMS_041712_NAR_50mM_plus2.11894.11894.3  | 3 | 3.84 | 0 | 2.19E+05  | (K)HLHPD(K)K(L)H(P)D(E)V(S)E(L)E(R)                | 130.8  | 522.5972 | 1565.781 | -0.0035  | -2.3  | 4.17    | 53035.1  | 9.47  | HUMAN | ELP60                                  | Zinc finger protein 207                                     |
| 24422 | dirMS_041712_NAR_50mM_plus2.17347.17347.3  | 3 | 3.84 | 0 | 2.34E+05  | (K)H(D)A(Y)K(L)D(V)A(T)G(V)S(D)L(R)K               | 159.02 | 460.5906 | 1379.742 | 0.0156   | 11.3  | 4.21    | 76115.6  | 7.42  | HUMAN | HDY64                                  | M-phase phosphoprotein 9 (Fragment)                         |
| 24423 | dirMS_041712_NAR_50mM_plus2.6526.6526.3    | 3 | 3.84 | 1 | 1.51E+05  | (R)WQV(Q)R(V)Q(V)G(V)S(V)D(T)K(V)                  | 100.28 | 561.1901 | 1504.798 | 0.0046   | -1.4  | 4.56    | 43907.8  | 8.83  | HUMAN | PH3                                    | Keratin, type I cytoskeletal 18                             |
| 24424 | dirMS_041712_NAR_50mM_plus2.8807.8807.3    | 3 | 3.84 | 0 | 2.04E+05  | (K)VVQV(S)K(V)V(S)A(G)S(H)T(A)A(T)D(G)R(V)         | 113.58 | 633.6509 | 1898.92  | 0.0179   | 9.4   | 4.41    | 29854.8  | 9.49  | HUMAN | CJ93R                                  | Regulator of chromosome condensation (Fragment)             |
| 24425 | dirMS_041712_NAR_60mM_plus.11007.11007.3   | 3 | 3.84 | 1 | 1.12E+06  | (K)IAED(K)E(K)A(E)D(L)W(M)P(V)K                    | 115.45 | 445.2196 | 1333.646 | -0.0014  | -1.1  | 4.68    | 23145.8  | 11.25 | HUMAN | EP9M9                                  | 40S ribosomal protein S2 (Fragment)                         |
| 24426 | dirMS_041712_NAR_60mM_plus.12424.12424.3   | 3 | 3.84 | 1 | 9.17E+05  | T197T (K)AVEL(L)K(V)A(E)LL(L)D(L)M(K)R(M)          | 121.42 | 535.6249 | 1401.831 | 203.0467 | -20.3 | 6.12    | 24835.6  | 5.36  | HUMAN | CO0934                                 | Ras-related protein Rab-27B                                 |
| 24427 | dirMS_041712_NAR_60mM_plus.13591.13591.3   | 3 | 3.84 | 1 | 5.98E+05  | S219S (K)GGT(L)K(S)G(V)T(Q)K(V)K(L)E(R)            | 128.43 | 468.2467 | 1212.731 | 79.7433  | 5.7   | 8.5     | 146897.2 | 7.22  | HUMAN | EP9170                                 | Kinase D-interacting substrate of 220 kDa (Fragment)        |
| 24428 | dirMS_041712_NAR_60mM_plus.13675.13704.3   | 3 | 3.84 | 0 | 4.97E+05  | (R)HVEA(R)H(H)Q(V)E(Y)A(M)E(V)A(K)Q                | 128.4  | 478.6613 | 1431.73  | 0.0403   | 3     | 5.4     | 18685.5  | 9.45  | HUMAN | B4DVE8                                 | Protasome subunit alpha type                                |
| 24429 | dirMS_041712_NAR_60mM_plus.17818.17818.3   | 3 | 3.84 | 1 | 3.65E+04  | (R)KFL(E)R(G)K(F)L(W)E(C)N(D)A(L)R(V)              | 163.57 | 522.9381 | 1566.777 | 0.0231   | 14.7  | 6.07    | 95185.1  | 5.11  | HUMAN | P34932                                 | Heat shock 70 kDa protein                                   |
| 24430 | dirMS_041712_NAR_60mM_plus.19871.19871.3   | 3 | 3.84 | 0 | 3.29E+04  | (K)SF(W)W(K)S(F)L(W)M(E)D(N)T(R)                   | 163.53 | 549.2699 | 1645.797 | -0.0017  | -1.1  | 4.65    | 29478.9  | 6.26  | HUMAN | EP8PC8                                 | Creatine kinase U-type, mitochondrial                       |
| 24431 | dirMS_041712_NAR_60mM_plus.20579.20579.3   | 3 | 3.84 | 1 | 2.06E+05  | (R)IAQ(F)E(R)K(Q)F(E)Y(V)T(L)R                     | 167.4  | 506.6178 | 1517.843 | -0.0046  | -3    | 6.12    | 18505.2  | 10.14 | HUMAN | HYR5G5                                 | Stress-70 protein, mitochondrial (Fragment)                 |
| 24432 | dirMS_041712_NAR_60mM_plus.5078.5078.3     | 3 | 3.84 | 0 | 2.84E+05  | T1131 (R)IJA(A)S(L)R(L)A(A)S(V)C(K)                | 84.13  | 412.8904 | 1033.571 | 203.0856 | 5     | 8.75    | 17058.7  | 9.47  | HUMAN | OSV182                                 | Cyclin C                                                    |
| 24433 | dirMS_041712_NAR_60mM_plus.5142.5142.3     | 3 | 3.84 | 0 | 8.43E+04  | (R)NL(D)G(R)N(L)N(D)N(G)F(F)S(P)R                  | 85.22  | 451.5555 | 1352.659 | -0.0074  | -5.83 | 31969.9 | 5.03     | HUMAN | EP9AP | Tyrosine protein kinase Lck (Fragment) |                                                             |
| 24434 | dirMS_041712_NAR_120mM_minus.10942.10942.4 | 4 | 3.83 | 2 | 2.32E+05  | (K)Q(E)R(A)K(Q)E(R)A(A)A(A)A(K)N(G)S(S)G(K)        | 113.97 | 443.2296 | 1278.894 | 0.0026   | 1.5   | 9.99    | 18943.6  | 9.77  | HUMAN | HY0AD2                                 | Paired mesoderm homeobox protein 2B (Fragment)              |
| 24435 | dirMS_041712_NAR_120mM_minus.12401.12401.4 | 4 | 3.83 | 1 | 1.58E+05  | (R)P(R)P(R)A(R)P(R)P(A)Q(Q)P(Q)P(Q)G(Q)            | 121.65 | 460.5906 | 1393.007 | 0.0043   | -2.2  | 8.5     | 15002.8  | 9.11  | HUMAN | FE7W20                                 | Uncharacterized myosin-V                                    |
| 24436 | dirMS_041712_NAR_120mM_minus.13004.13004.3 | 3 | 3.84 | 0 | 1.97E+05  | (K)SQ(V)T(K)S(Q)T(V)P(E)S(Y)R(S)                   | 125.03 | 476.2347 | 1426.675 | 0.0146   | 10.2  | 6       | 51264.7  | 9.94  | HUMAN | EP9R4                                  | RUN domain-containing protein 3B                            |
| 24437 | dirMS_041712_NAR_120mM_minus.19165.19165.3 | 3 | 3.83 | 1 | 2.16E+05  | (R)ID(S)F(S)K(R)D(S)T(K)D(P)A(A)R(M)               | 160.47 | 511.9289 | 1533.791 | -0.0186  | -12.1 | 4.56    | 50034.3  | 6.1   | HUMAN | B724L4                                 | Dolichyl-diphosphoglycosyltransferase                       |
| 24438 | dirMS_041712_NAR_120mM_minus.7604.7604.3   | 3 | 3.83 | 1 | 5.53E+04  | M281M (R)SFA(E)R(S)R(A)E(V)E(S)M(Q)Y(K)I(Q)        | 95.73  | 476.8951 | 1412.684 | 15.9859  | -5.6  | 5.86    | 37296.3  | 5.3   | HUMAN | RBU64                                  | Keratin, type II cytoskeletal 8                             |
| 24439 | dirMS_041712_NAR_20mM_minus.11334.11334.2  | 2 | 3.83 | 0 | 3.30E+05  | M31M (H)M(P)H(M)P(L)P(L)P(L)P(L)                   | 160.05 | 562.3395 | 1084.597 | 219.0745 | 0.2   | 9.5     | 39133.5  | 4.5   | HUMAN | Q87R19.2                               | DNA endonuclease associated antigen C3                      |
| 24440 | dirMS_041712_NAR_20mM_minus.13784.13784.2  | 2 | 3.83 | 0 | 7.01E+04  | M405M (K)S(V)E(Q)E(S)G(M)N(V)M(Q)                  | 111.13 | 491.2976 | 1151.551 | 0.0014   | -1.1  | 4.56    | 49054.4  | 9.45  | HUMAN | PH3                                    | Keratin, type I cytoskeletal 18                             |
| 24441 | dirMS_041712_NAR_20mM_minus.7855.7855.2    | 2 | 3.83 | 0 | 8.48E+04  | S643M (K)S(V)G(S)M(V)H(V)K(H)                      | 128.45 | 581.7886 | 943.503  | 219.067  | -6.3  | 8.49    | 98251.3  | 9.33  | HUMAN | FSH493                                 | DNA exonuclease protein ERCC-6                              |
| 24442 | dirMS_041712_NAR_20mM_minus.9743.9743.2    | 2 | 3.83 | 0 | 2.50E+05  | M33M (K)VA(G)N(Q)K(V)G(M)D(V)E(L)T(E)R             | 143.53 | 732.355  | 1447.71  | 15.993   | -1.3  | 4       | 10949.3  | 5.28  | HUMAN | BD1F2                                  | 14-3-3 protein epsilon                                      |
| 24443 | dirMS_041712_NAR_30mM_plus.11165.11165.3   | 3 | 3.83 | 0 | 3.49E+05  | (K)QAD(Y)K(A)D(L)V(S)E(L)E(R)N                     | 157.08 | 500.2598 | 1498.765 | 0        | 0     | 5.32    | 55323    | 6.02  | HUMAN | B4DPJ8                                 | T-complex protein 1 subunit zeta                            |
| 24444 | dirMS_041712_NAR_30mM_plus.10918.10918.3   | 3 | 3.84 | 1 | 1.85E+05  | (R)Q(E)R(R)P(L)S(L)D(L)E(L)R                       | 91.7   | 458.8927 | 1523.781 | -0.0043  | -3.1  | 4.56    | 30771.4  | 6.02  | HUMAN | BD1F2                                  | 14-3-3 protein epsilon                                      |
| 24445 | dirMS_041712_NAR_30mM_plus.8187.8187.3     | 3 | 3.83 | 0 | 2.04E+05  | (K)GLGA(L)K(S)L(V)A(W)D(E)S(T)G(S)A(K)R(L)         | 114.43 | 496.9372 | 1488.802 | -0.0046  | -3.1  | 6.07    | 30711.4  | 7.15  | HUMAN | H3P5F8                                 | Fructose-bisphosphate aldolase A (Fragment)                 |
| 24446 | dirMS_041712_NAR_30mM_plus.14764.14764.3   | 3 | 3.84 | 1 | 3.59E+05  | T390T (R)IK(A)A(H)R(K)A(A)H(Y)S(E)A(L)R            | 142.55 | 532.935  | 1516.812 | 79.79786 | 7.7   | 6.75    | 57893    | 6.01  | HUMAN | OSQ6U6                                 | 1-aminocyclopropane-1-carboxylate synthase-like protein 1   |
| 24447 | dirMS_041712_NAR_60mM_minus.16457.16457.3  | 3 | 3.83 | 1 | 1.28E+05  | (K)W(V)A(Q)S(V)M(V)A(Q)S(V)A(W)P(N)R(S)            | 151.82 | 552.9674 | 1656.886 | 0.0011   | 1.2   | 8.75    | 6412.4   | 9.52  | HUMAN | JK354                                  | Cytosolic non-specific dipeptidase (Fragment)               |
| 24448 | dirMS_041712_NAR_60mM_plus.9013.9013.3     | 3 | 3.83 | 1 | 1.10E+05  | M754M (K)T(V)E(K)K(C)I(V)F(E)K(E)N(F)S(V)M(Q)      | 110.13 | 576.5915 | 1711.778 | 15.9821  | -7.4  | 4.68    | 26700.7  | 5.95  | HUMAN | G13D08                                 | Acetyl-CoA carboxylase 1                                    |
| 24449 | dirMS_041712_NAR_120mM_plus.4088.4088.2    | 2 | 3.83 | 0 | 9.51E+04  | M416M (R)K(T)E(S)R(T)K(E)I(S)R(M)N                 | 69.42  | 408.8687 | 1208.594 | 15.9776  | 2.2   | 5.81    | 37296.3  | 5.3   | HUMAN | PH3                                    | Keratin, type II cytoskeletal 8                             |
| 24450 | dirMS_041712_NAR_20mM_plus.16134.16134.3   | 3 | 3.83 | 0 | 1.70E+05  | (K)D(A)T(K)K(D)A(G)T(A)G(L)M(V)L(R)                | 189.65 | 400.5627 | 1199.674 | -0.0007  | -0.6  | 5.84    | 17973    | 5.16  | HUMAN | EP965                                  | Heat shock cognate 71 kDa protein (Fragment)                |
| 24451 | dirMS_041712_NAR_20mM_plus.16554.16554.2   | 2 | 3.83 | 1 | 6.63E+04  | M416M (R)S(E)R(R)T(T)E(P)S(T)M(M)E(V)R(K)          | 185.55 | 821.3739 | 1625.751 | 15.9859  | -3.2  | 4.78    | 62626.3  | 8.69  | HUMAN | Q7K6D6                                 | Serpinin                                                    |
| 24452 | dirMS_041712_NAR_20mM_plus.18345.18345.2   | 2 | 3.83 | 0 | 6.04E+04  | (K)N(G)T(A)K(L)G(T)A(E)A(L)G(T)                    | 150    | 529.3028 | 1057.6   | -0.0017  | -1.6  | 6       | 260187.7 | 6.1   | HUMAN | Q3TCUC                                 | Talin 1                                                     |
| 24453 | dirMS_041712_NAR_30mM_plus.18988.18988.2   | 2 | 3.83 | 1 | 3.09E+05  | V17M (K)S(V)G(S)E(V)M(V)M(Q)                       | 153.4  | 606.764  | 1916.511 | 0.0075   | 6.2   | 5.88    | 30771.4  | 6.02  | HUMAN | Q3TCUC                                 | Talin 1                                                     |
| 24454 | dirMS_041712_NAR_30mM_plus2.20607.20607.2  | 2 | 3.83 | 0 | 1.10E+05  | (K)S(V)T(S)K(S)S(V)T(S)F(S)R(K)                    | 162.73 | 518.709  | 1036.604 | -0.013   | -12.5 | 8.47    | 132902.3 | 5.82  | HUMAN | IKB2L4                                 | Isolectin-B4-binding protein, cytoplasmic                   |
| 24455 | dirMS_041712_NAR_40mM_plus2.1157.1157.3    | 3 | 3.83 | 1 | 9.36E+04  | (R)LV(V)M(V)R(L)P(V)F(M)G(K)G(V)H(G)M(L)K(K)       | 131.92 | 614.3443 | 1841.01  | 0.0081   | 4.4   | 8.57    | 9912.2   | 9.69  | HUMAN | CP712                                  | Profilin-2                                                  |
| 24456 | dirMS_041712_NAR_40mM_plus2.10557.10557.3  | 3 | 3.83 | 0 | 5.38E+05  | (K)M(V)P(Q)M(V)D(V)P(E)P(H)G(M)K(F)                | 155.88 | 494.5783 | 1481.713 | 0.0076   | 5.2   | 4.65    | 9016.8   | 5.52  | HUMAN | Q13263                                 | Transcription intermediary factor 1-beta                    |
| 24457 | dirMS_041712_NAR_50mM_plus.12391.12391.3   | 3 | 3.83 | 1 | 2.51E+05  | (R)Q(E)R(R)Q(E)H(R)R(L)C(Q)L(R)                    | 93.33  | 489.2747 | 1465.806 | 0.0017   | 2.7   | 9.51    | 27389.6  | 9.89  | HUMAN | Q13263                                 | Transcription intermediary factor 1-beta                    |
| 24458 | dirMS_041712_NAR_50mM_plus2.19105.19105.3  | 3 | 3.83 | 0 | 5.24E+05  | (R)IG(F)G(I)T(F)E(F)E(F)T(F)M(F)E(H)S(V)A(M)R(L)   | 168.8  | 661.3258 | 1981.959 | 0.004    | 2.2   | 6.75    | 17170.1  | 8.86  | HUMAN | PH879                                  | Putative RNA-binding protein                                |
| 24459 | dirMS_041712_NAR_60mM_plus.16122.16122.3   | 3 | 3.83 | 1 | 1.12E+06  | (K)T(D)K(T)K(T)D(L)E(V)L(M)G(K)E                   | 140.48 | 406.908  | 1218.713 | -0.0022  | -2.6  | 8.26    | 11504.1  | 9.57  | HUMAN | K7E44                                  | Profilin 1, isoform CRA_b                                   |
| 24460 | dirMS_041712_NAR_60mM_plus.7695.7695.3     | 3 | 3.83 | 1 | 7.88E+05  | (K)T(P)K(S)K(T)P(K)P(S)S(V)E(D)I(A)K               | 98.27  | 419.894  | 1257.669 | -0.0011  | -0.8  | 5.73    | 32745.6  | 4.64  | HUMAN | PH0748                                 | Nucleophosmin                                               |
| 24461 | dirMS_041712_NAR_60mM_plus.7942.7942.3     | 3 | 3.83 | 1 | 2.00E+05  | (R)I(V)A(E)W(R)R(L)A(E)M(V)G(A)                    |        |          |          |          |       |         |          |       |       |                                        |                                                             |

|       |                                            |   |      |   |                |                                                             |        |          |          |          |       |      |          |             |         |                                                                                           |                         |
|-------|--------------------------------------------|---|------|---|----------------|-------------------------------------------------------------|--------|----------|----------|----------|-------|------|----------|-------------|---------|-------------------------------------------------------------------------------------------|-------------------------|
| 24521 | dirMS_041712_NAR_60mM_minus.11557.1157.3   | 3 | 3.8  | 1 | 6.58E-04       | (KIDITDYM)(K)I D T D V(M) V(G/S/Y G P R I A)                | 122.35 | 534.951  | 1601.763 | -0.0044  | -2.7  | 5.96 | 21671    | 5.37 HUMAN  | J3KTF8  | Rho GDP-dissociation inhibitor 1 (Fragment)                                               |                         |
| 24522 | dirMS_041712_NAR_60mM_minus.8886.8886.3    | 3 | 3.8  | 0 | 4.32E-03       | (RITLHSD)(R)T L H S D F E G(V) V(D/V) D R I A)              | 109.43 | 553.919  | 1659.746 | -0.0022  | -1.9  | 4.03 | 23007.1  | 5.11 HUMAN  | EP9H2H  | Peptidyl-prolyl cis-trans isomerase (Fragment)                                            |                         |
| 24523 | dirMS_041712_NAR_120mM_plus.4388.4388.3    | 3 | 3.8  | 1 | 2.58E-05       | (RIAAEED)(R)A A I E G L A A V L K Q P R I A)                | 72.2   | 424.903  | 1255.62  | -0.0005  | -0.4  | 4.53 | 23529.7  | 6.22 HUMAN  | FA2H2   | Farnesyltransferase                                                                       |                         |
| 24524 | dirMS_041712_NAR_120mM_plus.7808.7808.3    | 3 | 3.8  | 1 | 1.27E+05 S2s   | (JMSJGAE)(J)M S L G G V A S E(V) P D A R I A)               | 94.02  | 565.291  | 1490.763 | 203.9704 | 10.6  | 8.5  | 62319.4  | 5.18 HUMAN  | OYB11   | Copine-9                                                                                  |                         |
| 24525 | dirMS_041712_NAR_30mM_plus2.19883.19883.2  | 2 | 3.8  | 1 | 4.21E+05       | (KJKELEAT)(K)E K L E A T(N)M(L) V I C)                      | 158.18 | 629.8458 | 1258.689 | -0.0046  | -3.6  | 4.25 | 9680     | 5.77 HUMAN  | BIALW1  | Thioesterin                                                                               |                         |
| 24526 | dirMS_041712_NAR_30mM_plus2.19960.19960.2  | 2 | 3.8  | 0 | 1.19E+05       | (KSLNMDN)(K)S L N N Q F A S F V D V K I)                    | 158.18 | 692.3489 | 1383.69  | 0.0002   | -0.2  | 5.55 | 66208.7  | 8.32 HUMAN  | PO4264  | Keratin, type II cytoskeletal 1                                                           |                         |
| 24527 | dirMS_041712_NAR_30mM_plus2.5410.5410.2    | 2 | 3.8  | 0 | 4.55E+05       | (KYSVFEED)(K)Y S V F E E K N I)                             | 81.8   | 432.383  | 825.393  | -0.0008  | -0.2  | 4.53 | 31330.8  | 9.26 HUMAN  | EP9D82  | NADH dehydrogenase, mitochondrial                                                         |                         |
| 24528 | dirMS_041712_NAR_40mM_plus2.10362.10362.3  | 3 | 3.8  | 0 | 3.00E-04       | (KIDQAMSA)(K)Q A M A S A T Q T I A A I A Q I A S T P K I A) | 125.83 | 665.6807 | 1955.025 | 0.0022   | -1.1  | 8.76 | 260187.7 | 6.11 HUMAN  | OSTJCU6 | Talin 1                                                                                   |                         |
| 24529 | dirMS_041712_NAR_40mM_plus2.5931.5931.2    | 2 | 3.8  | 0 | 2.43E-04       | (KJGGELQ)(K)G E Q L G P A E R I A)                          | 92.77  | 507.2532 | 1013.501 | -0.0019  | -1.9  | 4.53 | 96306.4  | 6.41 HUMAN  | P13639  | Elongation factor 2                                                                       |                         |
| 24530 | dirMS_041712_NAR_40mM_plus2.6732.6732.2    | 2 | 3.8  | 0 | 9.58E-04 M189m | (KJLGTGM)(K)J L T G M A F R R V I)                          | 99.87  | 406.2085 | 795.418  | 15.9916  | -4.1  | 9.75 | 31718.5  | 7.17 HUMAN  | ETL7U4  | Glyceroldehyde 3-phosphate dehydrogenase                                                  |                         |
| 24531 | dirMS_041712_NAR_40mM_plus2.7251.7251.2    | 2 | 3.8  | 0 | 1.08E+05       | (KJSDYRFD)(K)S Y D R F D R I)                               | 102.97 | 437.1906 | 873.374  | 0.0002   | 0.2   | 4.7  | 22761.5  | 9.91 HUMAN  | C3H6W7  | Creatine kinase U-type, mitochondrial (Fragment)                                          |                         |
| 24532 | dirMS_041712_NAR_40mM_plus2.7257.7257.2    | 2 | 3.8  | 0 | 6.89E-03       | (KJSDGGG)(K)S D G G V G S V G P Q E U R I A)                | 102.97 | 408.81   | 1284.52  | -0.0004  | -1.1  | 6.1  | 67799.7  | 9.19 HUMAN  | P23772  | Heterotrimeric nucleoside receptor protein M                                              |                         |
| 24533 | dirMS_041712_NAR_40mM_plus2.9784.9784.2    | 2 | 3.8  | 0 | 1.72E+05       | (KJELVNF)(K)E L N V F A K I A)                              | 112.2  | 442.7291 | 884.451  | -0.0003  | -0.4  | 6.1  | 41827.5  | 7           | HUMAN   | B727A9                                                                                    | Phosphoglycerate kinase |
| 24534 | dirMS_041712_NAR_60mM_plus.5491.5491.3     | 3 | 3.8  | 0 | 5.20E-04 M111m | (RJMEEHLN)(R)M E L H N Q E M Q K R I)                       | 86.12  | 478.2118 | 1416.625 | 15.9962  | -0.9  | 4.75 | 26419.2  | 5.1 HUMAN   | HDYK97  | Splicing factor, proline- and glutamine-rich (Fragment)                                   |                         |
| 24535 | dirMS_041712_NAR_120mM_minus.13921.13921.3 | 3 | 3.79 | 1 | 1.31E+05       | (RJMEDRRE)(R)M D R E L I V I V A R T I)                     | 129.7  | 483.2462 | 1447.721 | 0.0031   | 2.1   | 4.32 | 55323    | 6.02 HUMAN  | B4DF98  | T-complex protein 1 subunit zeta                                                          |                         |
| 24536 | dirMS_041712_NAR_20mM_plus.7027.7027.2     | 2 | 3.79 | 0 | 2.13E+05 M33m  | (RJDGMRK)(R)D G M R K A A F V K I)                          | 117.98 | 558.025  | 1102.545 | 15.9944  | -0.4  | 4.14 | 26091.9  | 4.7 HUMAN   | PS1658  | Heptanso-derived growth factor                                                            |                         |
| 24537 | dirMS_041712_NAR_30mM_minus2.11307.11334.2 | 2 | 3.79 | 0 | 7.99E+05       | (RJTSPSPV)(R)T S P S V P V S R I)                           | 115.13 | 497.265  | 993.536  | -0.0136  | -13.7 | 9.4  | 451536.6 | 6.01 HUMAN  | Q12404  | Cytoplasmic dynein 1 heavy chain 1                                                        |                         |
| 24538 | dirMS_041712_NAR_30mM_minus2.11908.11908.2 | 2 | 3.79 | 0 | 2.93E+05       | (RJAFFGQR)(R)A F F G Q P L A D I)                           | 117.87 | 400.7352 | 800.467  | -0.0034  | -4.2  | 8.8  | 253486.5 | 5.51 HUMAN  | J3KJL6  | Protein transport protein Sec16A                                                          |                         |
| 24539 | dirMS_041712_NAR_30mM_minus2.12253.12253.2 | 2 | 3.79 | 0 | 2.84E+05       | (KJSTTDSI)(K)S T I T D S I V C V I A)                       | 120.08 | 562.2838 | 1123.566 | -0.006   | -5.4  | 5.55 | 96306.4  | 6.41 HUMAN  | P13639  | Elongation factor 2                                                                       |                         |
| 24540 | dirMS_041712_NAR_30mM_minus2.14437.14437.2 | 2 | 3.79 | 0 | 2.18E+05 M320m | (KJYHACL)(R)Y H A C L L V R I)                              | 131.17 | 633.2755 | 1246.553 | 15.9951  | -0.1  | 8.59 | 50705.6  | 5.58 HUMAN  | ADN4W2  | Tubulin alpha chain-like 3                                                                |                         |
| 24541 | dirMS_041712_NAR_30mM_minus2.7535.7535.2   | 2 | 3.79 | 0 | 2.56E+05       | (KJQYDAM)(K)Q Y D A M I A)                                  | 95.52  | 447.2217 | 893.448  | -0.0114  | -12.8 | 5.83 | 69382.2  | 8.82 HUMAN  | HOYS17  | Coiled-coil and C2 domain-containing protein 18 (Fragment)                                |                         |
| 24542 | dirMS_041712_NAR_40mM_minus.8054.8054.3    | 3 | 3.79 | 1 | 3.06E+05       | (RJDGKLV)(R)D G K L V S E V S D L P L K I)                  | 128.17 | 491.9311 | 1473.78  | -0.0008  | -0.5  | 4.56 | 56607.4  | 5.37 HUMAN  | F8VB4A  | Keratin, type II cytoskeletal 8                                                           |                         |
| 24543 | dirMS_041712_NAR_40mM_minus.8317.8317.3    | 3 | 3.79 | 0 | 8.43E-03       | (KJMLTGP)(R)M L T G P V V Y Q S T A L T H K I)              | 129.58 | 678.6359 | 1731.889 | 0.0041   | 2.3   | 8.37 | 138084.9 | 5.58 HUMAN  | Q8QV65  | Cullin-associated NEDD8-dissociated protein 1                                             |                         |
| 24544 | dirMS_041712_NAR_40mM_minus.8147.1147.3    | 3 | 3.79 | 1 | 3.80E+05 T698t | (KJFDEK)(K)F D E K A V R A L F K I)                         | 130.65 | 624.9684 | 1789.911 | 79.9794  | 7     | 4.56 | 124989.3 | 5.69 HUMAN  | J3KJN75 | TBC1 domain family member 8B                                                              |                         |
| 24545 | dirMS_041712_NAR_60mM_minus.13426.13426.3  | 3 | 3.79 | 1 | 3.04E+05       | (KJFDEK)(R)F D E K A V R A L F K I)                         | 135.1  | 425.9025 | 1275.694 | -0.0014  | -11.1 | 4.07 | 13379.2  | 6.99 HUMAN  | Q8QV65  | Cytoplasmic nuclear protein 1 (Fragment)                                                  |                         |
| 24546 | dirMS_041712_NAR_60mM_minus.8519.8519.3    | 3 | 3.79 | 1 | 1.02E+05       | (KJHLSFPE)(K)E L K S P D G F G F E K I)                     | 102.47 | 445.8849 | 1335.643 | -0.0025  | -1.9  | 4.41 | 84557.3  | 6.5 HUMAN   | Q04609  | Glutamate carboxypeptidase 2                                                              |                         |
| 24547 | dirMS_041712_NAR_120mM_plus.13162.13162.3  | 3 | 3.79 | 1 | 8.67E+05 K266k | (RJIHFSRE)(R)I H F S R E R D Q A G K I)                     | 122.72 | 467.9029 | 1287.644 | 114.0501 | -5.1  | 6.75 | 36961.9  | 6.1 HUMAN   | HDYF88  | Protein NLRCS (Fragment)                                                                  |                         |
| 24548 | dirMS_041712_NAR_120mM_plus.17564.17564.4  | 4 | 3.79 | 1 | 2.88E+05       | (KJSMXVY)(K)S M X V L F V V T P Q P V P K I)                | 145.25 | 442.0215 | 1765.026 | -0.0017  | -4.9  | 5.93 | 206102.3 | 9.72 HUMAN  | EP9AV3  | Nascent polypeptide-associated complex subunit alpha                                      |                         |
| 24549 | dirMS_041712_NAR_120mM_plus.17564.17564.4  | 4 | 3.79 | 1 | 5.39E+05 K326  | (KJSMXVY)(K)S M X V L F V V T P Q P V P K I)                | 174.47 | 491.7688 | 1845.021 | -0.0024  | -10.8 | 5.88 | 47373.3  | 5.26 HUMAN  | F8V279  | Keratin, type I cytoskeletal 18                                                           |                         |
| 24550 | dirMS_041712_NAR_20mM_plus.10422.10422.3   | 3 | 3.79 | 0 | 2.60E+05       | (RJAQFAN)(R)A Q F A N T A V T N A R I A)                    | 145.25 | 440.566  | 1319.67  | -0.0024  | -1.9  | 5.88 | 43773.3  | 5.26 HUMAN  | F8V279  | Keratin, type I cytoskeletal 18                                                           |                         |
| 24551 | dirMS_041712_NAR_20mM_plus.12239.12239.2   | 2 | 3.79 | 0 | 1.17E+05       | (KJVNQGG)(K)Q V N Q I Q V S V T E S I Q A G K I)            | 157.67 | 611.1414 | 1633.821 | -0.0059  | -3.6  | 5.97 | 47328.4  | 7.76 HUMAN  | P13929  | Beta-enolase                                                                              |                         |
| 24552 | dirMS_041712_NAR_20mM_plus.7582.7582.2     | 2 | 3.79 | 0 | 1.52E+05 M328m | (KJAlAmdE)(K)Al A m D E V E V K I)                          | 112.15 | 460.741  | 904.481  | 15.9939  | -1.1  | 4.37 | 41827.5  | 7           | HUMAN   | B727A9                                                                                    | Phosphoglycerate kinase |
| 24553 | dirMS_041712_NAR_40mM_plus.10979.10979.3   | 3 | 3.79 | 0 | 9.57E+05       | (KJVLVAD)(R)K V L V A D R E V R E A R K I)                  | 130.82 | 625.1662 | 1835.575 | -0.0008  | -0.4  | 8.56 | 4242.2   | 7.76 HUMAN  | EP1408  | Thiosulfonate sulfuryltransferase (Fragment)                                              |                         |
| 24554 | dirMS_041712_NAR_40mM_plus2.5046.5046.2    | 2 | 3.79 | 0 | 1.24E+05       | (RJJGGAG)(R)G G A G V G S M T K I)                          | 84.1   | 432.7157 | 864.424  | -0.0003  | -2.3  | 8.75 | 16600.2  | 10.31 HUMAN | P39109  | 40S ribosomal protein S19                                                                 |                         |
| 24555 | dirMS_041712_NAR_40mM_plus2.5636.5636.2    | 2 | 3.79 | 0 | 1.07E+05       | (KJAPFGG)(K)A P F G G P F G D N R I)                        | 90.47  | 417.1996 | 833.39   | 0.0019   | 2.3   | 5.88 | 61224.7  | 5.7 HUMAN   | P18089  | 60 kDa heat shock protein, mitochondrial                                                  |                         |
| 24556 | dirMS_041712_NAR_50mM_plus2.10476.10476.3  | 3 | 3.79 | 1 | 5.08E+05       | (KJMTXGK)(R)M T X G K V Q D F Q E D I)                      | 104.73 | 494.5783 | 1481.73  | -0.0101  | -6.8  | 4.56 | 27633.2  | 8.89 HUMAN  | AM8T58  | Phytoanthryl-coagulinase, peroxisomal                                                     |                         |
| 24557 | dirMS_041712_NAR_50mM_plus2.15949.15949.3  | 3 | 3.79 | 1 | 5.08E+05       | (RJFLDRD)(R)F L D R D M T L P Q V I A K I)                  | 123.07 | 606.3362 | 1816.959 | -0.0049  | -2.7  | 5.96 | 18188.9  | 10.98 HUMAN | K7E9P7  | Ferrocitochal, mitochondrial (Fragment)                                                   |                         |
| 24558 | dirMS_041712_NAR_50mM_plus2.7267.7267.3    | 3 | 3.79 | 0 | 1.11E+05       | (KJTMPLK)(R)T M P L K P L Q E P A R K I)                    | 104    | 445.9257 | 1335.763 | -0.0005  | -1.9  | 4.63 | 102941.5 | 6.73 HUMAN  | Q8QV65  | CAMP-dependent protein kinase type I-alpha regulatory subunit (Fragment)                  |                         |
| 24559 | dirMS_041712_NAR_60mM_plus.12924.12924.3   | 3 | 3.79 | 0 | 5.27E+05 K135k | (KJLYNML)(K)Y N L Q E Y A R I)                              | 124.07 | 516.9402 | 1434.740 | 114.0572 | 9.2   | 8.5  | 42782    | 7.95 HUMAN  | Q6IC47  | Aspartate beta-hydrolyase domain-containing protein 2                                     |                         |
| 24560 | dirMS_041712_NAR_60mM_plus.16433.16433.3   | 3 | 3.79 | 0 | 6.32E+05       | (RJIETHSAL)(R)I E T H S A L G I A L Q I A F A K I)          | 142.22 | 514.2744 | 1540.812 | -0.0032  | -2.1  | 6.85 | 141616.6 | 6.1 HUMAN   | B7ZKM8  | Protein transport protein Sec24B                                                          |                         |
| 24561 | dirMS_041712_NAR_120mM_minus.17129.17129.4 | 4 | 3.78 | 1 | 2.93E+05       | (RJIQEVTI)(R)I Q E V T I L E D V T L E H V K I)             | 148.33 | 442.9877 | 1768.933 | -0.0038  | -2.1  | 4.5  | 61990.6  | 4.88 HUMAN  | Q43242  | 26S proteasome non-ATPase regulatory subunit 3                                            |                         |
| 24562 | dirMS_041712_NAR_20mM_plus.11819.11819.3   | 3 | 3.78 | 1 | 3.40E+05 M410m | (KJLVGTE)(K)V L G T E V L D I L K V I)                      | 137.15 | 521.2632 | 1361.691 | -0.004   | -10.4 | 4.88 | 10890.9  | 6.01 HUMAN  | Q8QV65  | 60 kDa heat shock protein, mitochondrial                                                  |                         |
| 24563 | dirMS_041712_NAR_20mM_plus.7566.7566.2     | 2 | 3.78 | 0 | 8.14E+05 S430m | (KJIEVDEK)(K)I E V D E K M L N Q V K N I)                   | 124.17 | 731.843  | 1446.689 | 15.9988  | 3.8   | 4.14 | 40069.4  | 4.88 HUMAN  | F7EYR1  | Tubulin beta chain                                                                        |                         |
| 24564 | dirMS_041712_NAR_30mM_minus2.9580.9580.2   | 2 | 3.78 | 0 | 1.74E+05       | (KJQTTWC)(K)Q T T W C I G V R I)                            | 106.35 | 561.7582 | 1122.5   | 0.0005   | -3.8  | 5.84 | 28616.5  | 9.48 HUMAN  | OP9016  | Thymocyte nuclear protein 1                                                               |                         |
| 24565 | dirMS_041712_NAR_50mM_plus2.13108.13108.3  | 3 | 3.78 | 0 | 3.52E+05 M84m  | (KJYPHEH)(K)Y P H E H G I T W N D D m E I)                  | 141.62 | 659.6398 | 1960.911 | 15.9939  | -0.5  | 4.31 | 32615.5  | 5.18 HUMAN  | AN6176  | Actin, alpha skeletal muscle                                                              |                         |
| 24566 | dirMS_041712_NAR_50mM_plus2.17603.17603.3  | 3 | 3.78 | 1 | 1.24E+05       | (KJNKAAG)(K)N K A A G A I A G L L K V I)                    | 108.68 | 452.601  | 1355.789 | -0.0008  | -0.6  | 4.07 | 13768.8  | 9.33 HUMAN  | B7Z451  | Transcription elongation factor A protein 1                                               |                         |
| 24567 | dirMS_041712_NAR_60mM_minus.11050.11050.3  | 3 | 3.78 | 2 | 1.71E+05       | (RJIIEGSPA)(R)I E G S P A R D C G C L V I)                  | 121.48 | 515.2815 | 1543.826 | 0.0039   | 2.5   | 8.59 | 123793.4 | 5.45 HUMAN  | H7C4U7  | Membrane-associated glynanlyase kinase, WW and POZ domain-containing protein 1 (Fragment) |                         |
| 24568 | dirMS_041712_NAR_120mM_plus.10847.10847.3  | 3 | 3.78 | 1 | 7.48E-04       | (KJYFEGE)(K)Y E F E G S D A D R I)                          | 109.63 | 415.205  | 1243.595 | 0.0051   | -4.1  | 4.68 | 53516.6  | 6.01 HUMAN  | Q12404  | Cytoplasmic dynein 1 heavy chain 1                                                        |                         |
| 24569 | dirMS_041712_NAR_20mM_plus.10771.10771.2   | 2 | 3.78 | 0 | 6.30E-04       | (KJDNVAA)(K)D N V A A I A V T V I)                          | 147.08 | 508.292  | 1015.578 | -0.0015  | -1.5  | 5.84 | 58642    | 4.95 HUMAN  | FHSI03  | Tubulin alpha-1C chain                                                                    |                         |
| 24570 | dirMS_041712_NAR_20mM_plus.11354.11354.2   | 2 | 3.78 | 0 | 1.79E+05       | (KJVDVAV)(R)K V D V A V A V I)                              | 150.78 | 456.7977 | 912.588  | 0.0004   | 0.5   | 8.72 | 61224.7  | 5.7 HUMAN   | P18089  | 60 kDa heat shock protein, mitochondrial                                                  |                         |
| 24571 | dirMS_041712_NAR_20mM_plus.12291.12291.3   | 3 | 3.78 | 0 | 1.55E+05 M586m | (KJNVDGK)(R)N V D G K S V A A G E Q V N D A V A L K I)      | 118    | 455.6545 | 1817.907 | -0.0009  | -6.9  | 6.21 | 92889.3  | 6.3 HUMAN   | Q8QV65  | CAMP                                                                                      |                         |

|       |                                             |   |      |   |          |                                                 |        |          |          |          |       |      |          |         |       |           |                                                                     |                                          |                                           |
|-------|---------------------------------------------|---|------|---|----------|-------------------------------------------------|--------|----------|----------|----------|-------|------|----------|---------|-------|-----------|---------------------------------------------------------------------|------------------------------------------|-------------------------------------------|
| 24630 | dirMS_041712_NAR_120mM_minus.15214.14       | 4 | 3.76 | 2 | 1.02E+05 | (R)ALDEE(R)A L K/D E/E K E(L) E/Q/Q/K/E1        | 136.97 | 487.0126 | 1945.031 | -0.0025  | -1.3  | 4.58 | 33450.2  | 4.73    | HUMAN | ZKRN67    | Topomycin alpha-3 chain                                             |                                          |                                           |
| 24631 | dirMS_041712_NAR_120mM_minus.69369.630.2    | 2 | 3.76 | 1 | 2.24E+05 | (R)HLLGEE(R)H M/G/E E S/R(R)                    | 89.75  | 530.7845 | 1060.563 | -0.0106  | -1.5  | 4.79 | 49709.6  | 6.15    | HUMAN | BOYCA4    | Vimentin                                                            |                                          |                                           |
| 24632 | dirMS_041712_NAR_30mM_minus.111176.11176.1  | 2 | 3.76 | 0 | 3.89E+05 | (R)NTDSE(R)R I/D E/M/L P/E A/K                  | 122.73 | 556.279  | 1650.247 | -0.0055  | 0.2   | 4.3  | 51270.2  | 0.2     | 3.76  | 0.2       | HUMAN                                                               | ENP000293077                             | Heterogeneous nuclear ribonucleoprotein K |
| 24633 | dirMS_041712_NAR_50mM_minus.21095.10195.3   | 3 | 3.76 | 2 | 1.37E+05 | (R)KLLGEE(R)R P G V/V E/K S/E R(L)              | 126.83 | 530.9592 | 1590.871 | -0.0018  | -5    | 8.75 | 100418.1 | 9.65    | HUMAN | INVS283.3 | Isform 2 of Inversin                                                |                                          |                                           |
| 24634 | dirMS_041712_NAR_50mM_minus.215189.15189.3  | 3 | 3.76 | 1 | 1.38E+05 | (R)KVSQE(R)K V/S Q/V/L E I K K(V)               | 154.37 | 452.9385 | 1356.81  | -0.0087  | -6.4  | 6.11 | 128999.6 | 6.59    | HUMAN | ZK7E131   | Programmed cell death protein 5                                     |                                          |                                           |
| 24635 | dirMS_041712_NAR_50mM_minus.2148.7148.3     | 3 | 3.76 | 0 | 6.97E+04 | (R)SPRGLR(R)S P/Q/L/A F/V G/E D A M(KT)         | 107.35 | 554.9379 | 1443.715 | 219.0843 | 6     | 4.37 | 142001.7 | 6.82    | HUMAN | QD29797   | Splemkin                                                            |                                          |                                           |
| 24636 | dirMS_041712_NAR_50mM_minus.9708.9708.3     | 3 | 3.76 | 0 | 1.89E+05 | (R)SNMGH(R)K N(R)G/H P E/A/S R(L)               | 122.73 | 556.279  | 1650.247 | -0.0055  | 0.4   | 6.47 | 276060.7 | 6.15    | HUMAN | PA9227    | Fatty acid synthase                                                 |                                          |                                           |
| 24637 | dirMS_041712_NAR_60mM_minus.10053.10053.3   | 3 | 3.76 | 1 | 1.39E+05 | (R)GVDYQ(K)G Q/Y V A/V/K M(K)E                  | 115.77 | 417.9007 | 1251.677 | 0.011    | 1.8   | 8.8  | 8.5      | 78750.9 | 9.01  | HUMAN     | PS1813                                                              | Cytoskeletal tyrosine-protein kinase BMX |                                           |
| 24638 | dirMS_041712_NAR_60mM_minus.10514.10514.3   | 3 | 3.76 | 1 | 1.64E+06 | (R)KIQEVT(K) L Q/E A/T M/D S V K(R)             | 119.37 | 512.5957 | 1535.773 | -0.0008  | -0.5  | 4.68 | 558007.1 | 5.44    | HUMAN | PS8107    | Epilkan                                                             |                                          |                                           |
| 24639 | dirMS_041712_NAR_60mM_minus.7407.7407.3     | 3 | 3.76 | 0 | 1.48E+05 | (R)KTFEAF(K)T/V E/A/A H/G V/T R(H)              | 100.25 | 452.5678 | 1355.691 | -0.0025  | -1.9  | 5.37 | 45578.2  | 7.83    | HUMAN | B4D1FL    | Isocitrate dehydrogenase [NADP]                                     |                                          |                                           |
| 24640 | dirMS_041712_NAR_60mM_minus.7571.7571.3     | 3 | 3.76 | 0 | 1.62E+05 | (R)MGTAE(R)H G/M/T V/D D G E V V(R)             | 102.03 | 576.9315 | 1524.857 | 203.103  | 13.7  | 4.37 | 47571.8  | 6.71    | HUMAN | QD50K53   | Isform 3 of MBT domain-containing protein 1                         |                                          |                                           |
| 24641 | dirMS_041712_NAR_120mM_plus.10784.10784.2   | 2 | 3.76 | 1 | 1.37E+05 | (R)KTEKME(R)K Q/L V/M L/M A/R                   | 109.58 | 498.1362 | 1336.622 | -0.0021  | -0.9  | 4.49 | 24070.2  | 4.9     | HUMAN | QD50K53   | Non-POU domain-containing octamer-binding protein (Fragment)        |                                          |                                           |
| 24642 | dirMS_041712_NAR_120mM_plus.11832.11832.4   | 4 | 3.76 | 2 | 3.85E+05 | (R)FIVGEE(R) F I/V G/E R V T/A A E/P K A(KD)    | 114.12 | 478.2542 | 1830.048 | 79.9466  | -10.3 | 8.26 | 24239    | 7.03    | HUMAN | ETM2T     | Uncharacterized protein                                             |                                          |                                           |
| 24643 | dirMS_041712_NAR_120mM_plus.4387.4387.3     | 3 | 3.76 | 0 | 6.50E+05 | (R)LTNLSm(R)R/L/T/N S m m/V(K)R                 | 71.3   | 403.8446 | 1177.527 | 31.9918  | 1.6   | 9.75 | 23047.2  | 9.95    | HUMAN | PA6782    | 40S ribosomal protein S5                                            |                                          |                                           |
| 24644 | dirMS_041712_NAR_120mM_plus.5683.5683.3     | 3 | 3.76 | 1 | 1.37E+04 | (R)IDGQVE(R)D G/V G G S R D/S Y S S(RS)         | 82.67  | 498.5477 | 1493.625 | 0.0034   | 2.3   | 5.96 | 28019.3  | 10.03   | HUMAN | B3KXG5    | RNA-binding motif protein X chromosome, N-terminally processed      |                                          |                                           |
| 24645 | dirMS_041712_NAR_120mM_plus.6064.6064.3     | 3 | 3.76 | 0 | 1.40E+05 | (R)KLVGQ(K)K V/C D V/H F(V)K(M)                 | 85.22  | 485.2756 | 1305.626 | 159.9493 | 5.2   | 6.74 | 35022.9  | 9.43    | HUMAN | OY9585    | Olfactory receptor 1A2                                              |                                          |                                           |
| 24646 | dirMS_041712_NAR_120mM_plus.7338.7338.3     | 3 | 3.76 | 1 | 4.31E+05 | (R)SFFREE(R)S/S/R E/R D/V/Y(I)K                 | 153.5  | 468.4449 | 1403.619 | 0.0015   | 1.1   | 4.68 | 95051    | 6.63    | HUMAN | B3K0V5    | AP-1 complex subunit gamma-1                                        |                                          |                                           |
| 24647 | dirMS_041712_NAR_20mM_plus.10700.10700.2    | 2 | 3.76 | 0 | 8.63E+04 | (R)FLEQQR(R)F L/E/Q D/Q N Q/L Q(K)W             | 146.73 | 738.3942 | 1475.785 | -0.0041  | -2.8  | 6    | 62028.7  | 8.32    | HUMAN | P04264    | Keratin, type II cytoskeletal 1                                     |                                          |                                           |
| 24648 | dirMS_041712_NAR_20mM_plus.11123.11123.2    | 2 | 3.76 | 0 | 9.54E+04 | (R)YVLEAG(K) V I/E/L/A D M T A(RD)              | 148.77 | 617.3237 | 1217.656 | 15.9843  | -8.6  | 4.37 | 68200.1  | 8.69    | HUMAN | Q13322    | Growth factor receptor-bound protein 10                             |                                          |                                           |
| 24649 | dirMS_041712_NAR_20mM_plus.15215.15215.3    | 3 | 3.76 | 0 | 1.08E+05 | (R)KIVLSM(K)D V/S V A/F/S D/N(R)                | 176.4  | 437.2168 | 1308.638 | -0.0024  | -1.9  | 4.21 | 33029.4  | 9.62    | HUMAN | Q6R9L0    | Guanine nucleotide-binding protein subunit beta-2-like 1 (Fragment) |                                          |                                           |
| 24650 | dirMS_041712_NAR_30mM_plus.2.13026.13026.2  | 2 | 3.76 | 0 | 9.44E+05 | (R)KFSVPK(K)S/V/S/P/V R(V)                      | 122.38 | 445.759  | 890.509  | 0.0013   | 1.5   | 9.75 | 96306.4  | 6.41    | HUMAN | P13639    | Elongation factor 2                                                 |                                          |                                           |
| 24651 | dirMS_041712_NAR_30mM_plus.2.15443.15443.2  | 2 | 3.76 | 0 | 2.52E+05 | (R)KLVQCK(K) L/L V/Q I G/S(R)                   | 133.05 | 477.2409 | 873.515  | 79.9593  | -7.4  | 9.75 | 162083.3 | 6.42    | HUMAN | P13635    | Protein patched homolog 1                                           |                                          |                                           |
| 24652 | dirMS_041712_NAR_30mM_plus.2.17689.17689.2  | 2 | 3.76 | 1 | 9.72E+05 | (R)MVAERE(R)M/A/D/E R E L E(K)                  | 146.38 | 560.7925 | 1104.572 | 16.009   | 9.9   | 5.78 | 56155.2  | 6.97    | HUMAN | B4DWR9    | Peptidylprolyl isomerase domain and WD repeat-containing protein 1  |                                          |                                           |
| 24653 | dirMS_041712_NAR_30mM_plus.2.19343.19343.2  | 2 | 3.76 | 0 | 6.62E+05 | (R)LDNLRN(K)G F/Q/L/I V/L R(H)                  | 155.87 | 445.759  | 890.509  | 0.0013   | 1.5   | 9.75 | 18956.4  | 8.78    | HUMAN | CBJK0     | Phosphoribosylaminimidazolecarboxamide formyltransferase (Fragment) |                                          |                                           |
| 24654 | dirMS_041712_NAR_30mM_plus.2.9797.9797.2    | 2 | 3.76 | 0 | 6.72E+05 | (R)SGQDR(R)K G/D/V/L P A R(R)                   | 100.35 | 485.2772 | 1067.456 | -0.0005  | -0.5  | 9.75 | 15036.9  | 7.16    | HUMAN | ET74      | 11S kDa US small nuclear ribonucleoprotein component (Fragment)     |                                          |                                           |
| 24655 | dirMS_041712_NAR_40mM_plus.2.17853.17853.3  | 3 | 3.76 | 0 | 1.58E+05 | (R)LPVPPR(K) P/P/P/P/L Q/S L/D H V(K)A          | 171.4  | 583.3378 | 1474.974 | 0.0247   | 14.1  | 6.74 | 18575.3  | 9.69    | HUMAN | AP6V3     | Carnitine O-acetyltransferase                                       |                                          |                                           |
| 24656 | dirMS_041712_NAR_40mM_plus.2.18877.18877.3  | 3 | 3.76 | 1 | 9.82E+03 | (R)KIVAAE(K)Y V A/A N S G A R I G M A E I E(KH) | 175.73 | 631.6626 | 1892.99  | -0.1666  | -8.8  | 6.14 | 97883.4  | 6.02    | HUMAN | FGQI9     | Acetyl-CoA carboxylase 2                                            |                                          |                                           |
| 24657 | dirMS_041712_NAR_50mM_plus.2066.7066.3      | 3 | 3.76 | 0 | 1.15E+04 | (R)DVEGP(R)R/L V/E G P Q Y I M P/P(K)           | 102.95 | 528.4259 | 1486.761 | 95.9621  | 0.6   | 4.37 | 47165.4  | 8.29    | HUMAN | JK3C2     | Obg-like ATPase 1                                                   |                                          |                                           |
| 24658 | dirMS_041712_NAR_50mM_plus.1635.1635.3      | 3 | 3.76 | 0 | 1.40E+05 | (R)KIVGEE(R)K I/G/L V/L G/L A/L Q(K)            | 141.87 | 410.025  | 820.055  | -0.0021  | -1.9  | 5.96 | 29064    | 4.9     | HUMAN | QD50K53   | Elongation factor 1-alpha 1                                         |                                          |                                           |
| 24659 | dirMS_041712_NAR_50mM_plus.20792.20792.3    | 3 | 3.76 | 1 | 3.33E+05 | (R)KIVLSM(K)S V R S/L(W)P I R(R)                | 169.8  | 425.5789 | 1274.726 | -0.0034  | -2.7  | 8.75 | 14138.1  | 9.89    | HUMAN | CINV2     | Protein BUD3 homolog                                                |                                          |                                           |
| 24660 | dirMS_041712_NAR_120mM_minus.8281.8281.3    | 3 | 3.76 | 0 | 2.35E+04 | (R)EIEEVR(R)E I/E/E V/L/P E M L M R(W)          | 99.42  | 598.2869 | 1589.791 | 203.0548 | -13.7 | 4.09 | 48712.2  | 7.36    | HUMAN | P12622    | Kallistatin                                                         |                                          |                                           |
| 24661 | dirMS_041712_NAR_30mM_minus.2.13919.13919.2 | 2 | 3.76 | 0 | 2.31E+05 | (R)YFLEER(R)Y F/L/E/E R(M)                      | 129.37 | 485.2556 | 969.504  | -0.0001  | -0.1  | 4.53 | 277018.3 | 5.35    | HUMAN | EN9164    | Myomegamin                                                          |                                          |                                           |
| 24662 | dirMS_041712_NAR_30mM_minus.2.17526.17526.2 | 2 | 3.76 | 0 | 1.13E+05 | (R)YFLEER(R)E F/L/E/E R(M)                      | 155.5  | 561.7977 | 1614.301 | -0.0004  | -0.3  | 9.3  | 453      | 47866.6 | 6.78  | HUMAN     | CT6866                                                              | Centriole-associated protein of 152 kDa  |                                           |
| 24663 | dirMS_041712_NAR_30mM_minus.2.4310.4310.2   | 2 | 3.76 | 0 | 3.76E+03 | (R)ITAYGR(R)T A/V/G P/V N Q/V N(R)              | 72.02  | 534.7431 | 1052.483 | 15.956   | 1     | 8.26 | 58214.7  | 5.25    | HUMAN | B4D6E7    | T-complex protein 1 subunit theta                                   |                                          |                                           |
| 24664 | dirMS_041712_NAR_30mM_minus.2.6506.6506.2   | 2 | 3.76 | 0 | 1.63E+05 | (R)IQGEAF(R)G G/E/A/E/R N(K)                    | 89.93  | 475.7203 | 950.433  | 0.0007   | 0.7   | 4.53 | 80254.2  | 5.05    | HUMAN | DP6KKA    | Alpha actinin 4 short isoform                                       |                                          |                                           |
| 24665 | dirMS_041712_NAR_40mM_minus.2.11475.1475.3  | 3 | 3.76 | 0 | 1.13E+06 | (R)KISSQCK(K)S/S/V/S/P/P A L E I A N A H R(K)   | 172.05 | 640.3618 | 1919.071 | 0.1      | 0     | 6.75 | 61224.7  | 5.7     | HUMAN | P10809    | 60 kDa heat shock protein, mitochondrial                            |                                          |                                           |
| 24666 | dirMS_041712_NAR_50mM_minus.2.1402.1402.3   | 3 | 3.76 | 0 | 6.00E+04 | (R)KIVPAP(R)G P/V/P A/K P/T V L E F(K)          | 133.48 | 461.6052 | 1382.804 | -0.002   | -2.3  | 8.59 | 11075.6  | 7.92    | HUMAN | B4D6H3    | MAP3 light chain                                                    |                                          |                                           |
| 24667 | dirMS_041712_NAR_50mM_minus.2.1474.1474.3   | 3 | 3.76 | 1 | 4.15E+05 | (R)KIKGQR(K)K I/G/D I/P/L V/L G/L A/L Q(K)      | 142.35 | 457.2595 | 1362.769 | -0.0046  | -2.4  | 4.56 | 47209.6  | 6.42    | HUMAN | B4D6Y7    | 4-tetrahydrobiopterin:5,6-dihydroxytryptophan hydroxylase           |                                          |                                           |
| 24668 | dirMS_041712_NAR_60mM_minus.2.15626.15626.3 | 3 | 3.76 | 1 | 1.88E+05 | (R)ISYLVN(R)S Y L R V/N/L V/S R(I)              | 146.65 | 499.6192 | 1496.858 | -0.1533  | -10.2 | 9.99 | 87540.7  | 9.25    | HUMAN | QD5T1A    | DC-STAMP domain-containing protein 2                                |                                          |                                           |
| 24669 | dirMS_041712_NAR_60mM_minus.2.17417.17417.3 | 3 | 3.76 | 1 | 4.89E+04 | (R)SIVVRD(R)S T V R/D I/P Q/L D T F V(R)        | 155.6  | 630.6628 | 1889.972 | 0.0023   | 1.2   | 4.43 | 16537.8  | 9.59    | HUMAN | ETAKR6    | Dynein light chain roadblock-type 1                                 |                                          |                                           |
| 24670 | dirMS_041712_NAR_60mM_minus.2.6566.6566.3   | 3 | 3.76 | 0 | 1.29E+05 | (R)KALVYG(K)A L/E/L/G I E S E R(K)              | 95.48  | 470.2283 | 1408.696 | -0.0251  | -17.8 | 4.09 | 88641.6  | 4.98    | HUMAN | Q13364    | Cadherin-18                                                         |                                          |                                           |
| 24671 | dirMS_041712_NAR_60mM_minus.2.10084.10084.3 | 3 | 3.76 | 0 | 3.86E+05 | (R)KIVLSM(K)S V R S/L(W)P I R(R)                | 110.13 | 461.2807 | 1241.601 | 203.0548 | -14.7 | 4.67 | 18447    | 9.39    | HUMAN | QD50K53   | Protein alpha-1 containing protein 5                                |                                          |                                           |
| 24672 | dirMS_041712_NAR_120mM_plus.2.11202.11202.3 | 3 | 3.76 | 1 | 9.59E+05 | (R)KIVLSM(K)S T/K/L N V V S/R(L)                | 112.13 | 411.8988 | 1233.68  | -0.0017  | -1.7  | 8.41 | 11104.3  | 7.89    | HUMAN | QBNAT2    | T-complex protein 1 subunit gamma                                   |                                          |                                           |
| 24673 | dirMS_041712_NAR_120mM_plus.3563.3563.3     | 3 | 3.76 | 1 | 3.84E+06 | (R)M7FR(R)M E/V L/P/D E/R(K)                    | 59.57  | 418.1852 | 1033.473 | 219.0769 | -5.1  | 4.68 | 12703.1  | 11.31   | HUMAN | HD0Y5     | Plakophilin-3 (Fragment)                                            |                                          |                                           |
| 24674 | dirMS_041712_NAR_120mM_plus.8108.8108.2     | 2 | 3.76 | 0 | 4.29E+05 | (R)KAGEVF(R)G E I/V F/H R(K)                    | 96.3   | 450.7531 | 900.494  | 0.0051   | 5.7   | 6.79 | 23729.5  | 9.89    | HUMAN | CN217     | Non-POU domain-containing octamer-binding protein (Fragment)        |                                          |                                           |
| 24675 | dirMS_041712_NAR_20mM_plus.10342.10342.2    | 2 | 3.76 | 0 | 1.88E+05 | (R)M92mM(M)G P M A/V G P A/Q/G A F E R(M)       | 168.5  | 738.3568 | 1427.713 | 31.993   | 2.1   | 5.75 | 77799.7  | 9.59    | HUMAN | PS2272    | Heterogeneous nuclear ribonucleoprotein K                           |                                          |                                           |
| 24676 | dirMS_041712_NAR_20mM_plus.10654.10654.2    | 2 | 3.76 | 0 | 4.16E+04 | (R)LLNDN(K)K L/L/S N D/E V T Y(K)               | 146.68 | 566.3156 | 1313.620 | -0.0017  | -1.5  | 4.37 | 20421.7  | 8.46    | HUMAN | CUJ95     | Protein TFC (Fragment)                                              |                                          |                                           |
| 24677 | dirMS_041712_NAR_20mM_plus.12014.12014.2    | 2 | 3.76 | 0 | 5.20E+04 | (R)KVVVLA(K)R V/L S/V A/G R(Y)                  | 156.4  | 413.778  | 826.551  | -0.0022  | -2.6  | 9.72 | 4480.4   | 11.2    | HUMAN | K7EY7     | 60S ribosomal protein L27                                           |                                          |                                           |
| 24678 | dirMS_041712_NAR_20mM_plus.14369.14369.2    | 2 | 3.76 | 0 | 1.13E+05 | (R)FDITFL(R)F I/D/T/L A/V T S R(F)              | 171.23 | 619.3413 | 1237.679 | -0.0038  | -2.7  | 5.84 | 11439.8  | 9.3     | HUMAN | G3XAN8    | Mitochondrial inner membrane translocase subunit Timb B             |                                          |                                           |
| 24679 | dirMS_041712_NAR_20mM_plus.15997.15997.2    | 2 | 3.76 | 0 | 1.15E+05 | (R)KIFPLP(R)T P/L/V S/G L/V G R(K)              | 181.3  | 515.8306 | 1038.656 | -0.0014  | -1.8  | 8.75 | 276046.1 | 6.01    | HUMAN | F4927     | Fatty acid synthase                                                 |                                          |                                           |
| 24680 | dirMS_041712_NAR_20mM_plus.18488.18488.3    | 3 | 3.76 | 0 | 1.05E+04 | (R)AAVEE(R)R V E/G I/V L/G G C A L L R(K)       | 198.95 | 562.3058 | 1684.905 | -0.0021  | -0.2  | 4.53 | 51224.7  | 6.71    | HUMAN | QD50K53   | 60 kDa heat shock protein, mitochondrial                            |                                          |                                           |
| 24681 | dirMS_041712_NAR_20mM_plus.6434.6434.3      | 3 | 3.76 | 0 | 8.39E+04 | (R)SPPGPR(K)S P/P P/E M G L/N Q R(K)            | 107.48 | 428.5446 | 1267.621 | 15.9983  | 2.5   | 9.47 | 76262.2  | 9.53    | HUMAN | P23246    | Splicing factor, proline- and glutamine-rich                        |                                          |                                           |
| 24682 | dirMS_041712_NAR_20mM_plus.8254.8254.2      | 2 | 3.76 | 0 | 3.33E+05 | (R)KIVLSM(K)S V R S/L(W)P I R(R)                | 126.95 | 524.278  | 1031.555 | 15.9983  | -1.5  | 4.53 | 23799.1  | 9.48    | HUMAN | P23284    | Peptidyl-prolyl cis-trans isomerase B                               |                                          |                                           |
| 24683 | dirMS_041712_NAR_30mM_plus.2.15887.15887.2  | 2 | 3.76 | 0 | 4.22E+05 | (R)MGPVN(R)M G/V/V E/L R T E(R)                 | 136.4  | 546.7844 | 1092.551 | 0.0109   | 10    | 5.75 | 8641.9   | 9.77    | HUMAN | CIN5D5    | Protein Nsp9p homolog 1 (Fragment)                                  |                                          |                                           |
| 24684 | dirMS_041712_NAR_30mM_plus.2.7485.7485.2    | 2 | 3.76 | 0 | 7.39E+05 | (R)KIVLSM(K)S V R S/L(W)P I R(R)                | 61.8   | 466.1303 | 912.451  | 0.0059   | 6.4   | 5.96 | 29064    | 4.9     | HUMAN | QD50K     |                                                                     |                                          |                                           |

|       |                                            |      |           |       |                                                   |                                     |        |          |          |          |       |      |          |       |       |          |                                                                                          |
|-------|--------------------------------------------|------|-----------|-------|---------------------------------------------------|-------------------------------------|--------|----------|----------|----------|-------|------|----------|-------|-------|----------|------------------------------------------------------------------------------------------|
| 24739 | dirMS_041712_NAR_20mM_plus.10674.10674.2   | 3.73 | 0.428E+04 | M414m | (K)mDATAT(K)m D A/TN A/DV/P S P Y E V R(G)        | mDnaE2 methionine                   | 146.12 | 840.8792 | 1664.758 | 15.9927  | -1.3  | 4.03 | 53661.8  | 6.42  | HUMAN | G5EAS2   | Protein disulfide isomerase family A, member 3, isoform CRA_b                            |
| 24740 | dirMS_041712_NAR_20mM_plus.12805.12805.3   | 3.73 | 0.415E+05 |       | (K)YVTEEL(K)V Y E T V E L D Q G T(K)              | mDnaE2 methionine                   | 161.6  | 435.2319 | 1303.674 | 0.0072   | 5.5   | 4.26 | 332628.7 | 5     | HUMAN | GBNF0C   | Bifurcation of chromosomes in cell division protein 1-like 1                             |
| 24741 | dirMS_041712_NAR_20mM_plus.17132.17132.2   | 3.73 | 0.116E+05 |       | (K)FATFAE(K)A T E I E A V D E L(K)                | mDnaE2 methionine                   | 188.7  | 575.8467 | 1715.023 | 0.0077   | 6.4   | 4.21 | 16259.5  | 5.82  | HUMAN | ETC076   | T-complex protein 1 subunit alpha                                                        |
| 24742 | dirMS_041712_NAR_20mM_plus.7870.7870.2     | 3.73 | 0.856E+04 | M21m  | (K)ATVAM(K)A T A/V M P D G Q F G(K)               | mDnaE2 methionine                   | 124.45 | 500.7881 | 1164.572 | 15.9932  | -1.5  | 5.88 | 22338.2  | 8.65  | HUMAN | OQ6830   | Borealin                                                                                 |
| 24743 | dirMS_041712_NAR_20mM_plus.8627.8627.2     | 3.73 | 1.294E+04 |       | (R)JDAEIK(R) D A/E E K Q E I E R(K)               | mDnaE2 methionine                   | 130.13 | 615.823  | 1230.632 | 0.0063   | 5.1   | 4.41 | 60713.2  | 4.68  | HUMAN | Q9H175   | Cysteine/serine-rich nuclear protein 2                                                   |
| 24744 | dirMS_041712_NAR_20mM_plus.10017.10017.2   | 3.73 | 0.290E+05 |       | (R)IVDES(A)R(V)DE/ES A D E V(Q)M(K)               | mDnaE2 methionine                   | 106.02 | 579.7938 | 1146.564 | 0.0166   | 14.5  | 4.4  | 17163.6  | 4.64  | HUMAN | C9U128   | ADP-ribosylation factor 5 (Fragment)                                                     |
| 24745 | dirMS_041712_NAR_20mM_plus.18911.18911.2   | 3.73 | 0.532E+05 |       | (R)GLGPIED(R)G L V I P D D R(K)                   | mDnaE2 methionine                   | 151.88 | 460.7575 | 920.509  | 0.0032   | 3.4   | 4.21 | 16259.5  | 5.82  | HUMAN | W42374   | Perforin-4 (Fragment)                                                                    |
| 24746 | dirMS_041712_NAR_30mM_plus.4875.4875.2     | 3.73 | 0.307E+05 | M71m  | (K)EHTGHS(K)E T A G A V Q D L(N)R(K)              | mDnaE2 methionine                   | 77.37  | 555.2469 | 1093.494 | 15.9923  | -2.4  | 4.37 | 48845.9  | 4.72  | HUMAN | CAAM86   | Keratin, type I cuticular HaS                                                            |
| 24747 | dirMS_041712_NAR_30mM_plus.6597.6597.2     | 3.73 | 0.214E+05 |       | (K)JALDEH(K)A/L/D/E M E/K(K)                      | mDnaE2 methionine                   | 89.15  | 418.1994 | 835.387  | 0.0049   | 5.9   | 4.4  | 58856.7  | 6.26  | HUMAN | QBWX1F   | Paraspeckle component 1                                                                  |
| 24748 | dirMS_041712_NAR_40mM_plus.15556.15556.3   | 3.73 | 0.934E+05 |       | (R)IDVQIG(R) V Q/D/G D I V T V G E C R P L S(K)T  | C.Carbonium methylation             | 157.35 | 662.6815 | 1986.033 | -0.0025  | -1.3  | 4.56 | 18601.6  | 10.52 | HUMAN | PE2280   | 40S ribosomal protein S11                                                                |
| 24749 | dirMS_041712_NAR_40mM_plus.8974.8974.3     | 3.73 | 1.493E+04 |       | (K)KVPGCC(K) V P P E Q C/Q P K V F P C H P(K)     | C.Carbonium methylation             | 115.07 | 633.6448 | 1898.925 | -0.0053  | -2.8  | 6.73 | 10434.8  | 9.76  | HUMAN | Z22228   | Cornifin-1                                                                               |
| 24750 | dirMS_041712_NAR_50mM_plus.17307.17307.3   | 3.73 | 2.35E+05  |       | (K)KLDKGL(K)K D G D D L G Q F F R(K)              | C.Carbonium methylation             | 158.85 | 496.9631 | 1048.853 | 0.0028   | 1.8   | 5.89 | 51646.4  | 8.59  | HUMAN | W74639   | Protein phosphatase 1M                                                                   |
| 24751 | dirMS_041712_NAR_50mM_plus.20336.20336.3   | 3.73 | 1.399E+05 | T37m  | (R)SIVSQI(R)S I V/S Q I E K L V A P G(K)          | 1.Nucleotide biosynthesis (T)       | 176.32 | 542.9621 | 1423.770 | 203.0926 | 8.1   | 8.22 | 52187    | 9.34  | HUMAN | PO4279   | Semoneglin-1                                                                             |
| 24752 | dirMS_041712_NAR_50mM_plus.6481.6481.3     | 3.73 | 1.131E+05 | M365m | (R)TQDST(R)T V I E Q D T m P P K V I R(K)         | mDnaE2 methionine                   | 98.88  | 495.9283 | 1469.778 | 15.9923  | -1.8  | 6.07 | 73386.6  | 8.47  | HUMAN | BAD0X7   | ATP-dependent RNA helicase DDX3Y                                                         |
| 24753 | dirMS_041712_NAR_50mM_plus.8145.8145.3     | 3.73 | 0.112E+04 |       | (K)ASJESG(K)A S/E/G G T A A G A G A D S L H(K)    | mDnaE2 methionine                   | 105.49 | 543.6023 | 1628.787 | 0.0049   | 3     | 5.32 | 41747.8  | 9.36  | HUMAN | O15143   | Actin-related protein 2/3 complex subunit 18                                             |
| 24754 | dirMS_041712_NAR_60mM_plus.18600.18600.3   | 3.73 | 1.372E+05 |       | (K)VFSSSE(K)F F/S I S S E K L(N)                  | mDnaE2 methionine                   | 155.8  | 460.5971 | 1370.778 | -0.184   | -13.3 | 6.11 | 21205.4  | 6.66  | HUMAN | ETEKW7   | Casex kinase II subunit alpha                                                            |
| 24755 | dirMS_041712_NAR_60mM_plus.20251.20251.3   | 3.73 | 1.829E+03 |       | (R)IVREI(R)R V Y E/L/D K L D V I R(V)S            | mDnaE2 methionine                   | 169.95 | 499.2786 | 1495.815 | 0.0057   | 3.8   | 4.56 | 41296.9  | 9.52  | HUMAN | BAD772   | 26S proteasome non-ATPase regulatory subunit 3                                           |
| 24756 | dirMS_041712_NAR_120mM_minus.10597.10597.3 | 3.72 | 1.205E+04 |       | (K)LEEKW(K) E E K E W/L F D(K)                    | mDnaE2 methionine                   | 111.65 | 407.8893 | 1221.651 | 0.0019   | 1.6   | 4.79 | 299790.8 | 6.71  | HUMAN | Q6U899   | Ankyrin repeat domain-containing protein 11                                              |
| 24757 | dirMS_041712_NAR_120mM_minus.15838.15838.4 | 4.37 | 1.10E+05  |       | (K)QLFAD(K)R L E A I D V W L F Y E A V R(A)       | mDnaE2 methionine                   | 140.1  | 457.489  | 1826.976 | -0.0018  | -1    | 5.45 | 80254.2  | 5.05  | HUMAN | DP6PK4   | Alpha actin 4 short isoform                                                              |
| 24758 | dirMS_041712_NAR_120mM_minus.4367.4367.2   | 3.72 | 0.355E+05 |       | (K)HYVAM(K)K H/Y T A Q E I A(K)                   | mDnaE2 methionine                   | 72.92  | 489.2307 | 977.451  | 0.0022   | 3.3   | 6.75 | 39309.6  | 4.32  | HUMAN | FRWCY5   | Reticulocalbin-2                                                                         |
| 24759 | dirMS_041712_NAR_120mM_minus.7749.7749.3   | 3.72 | 0.984E+04 |       | (R)ILTSDG(R)I L T G A S D K P G E V S(K)          | mDnaE2 methionine                   | 96.62  | 430.2729 | 1288.674 | -0.0052  | -4    | 6.07 | 45227.6  | 6.28  | HUMAN | OT5936   | Gamma-butyrobetaine dioxygenase                                                          |
| 24760 | dirMS_041712_NAR_20mM_minus.12252.12252.3  | 3.72 | 0.942E+04 |       | (K)LVSGAI(K) L V S I G A E V D M G N A K(M)       | mDnaE2 methionine                   | 171.42 | 505.6069 | 1514.806 | 0.0001   | 0.1   | 4.4  | 105308.6 | 5.27  | HUMAN | Q43707   | Alpha-actinin-4                                                                          |
| 24761 | dirMS_041712_NAR_20mM_minus.8843.8843.3    | 3.72 | 1.142E+05 |       | (K)KICVCR(K)K C/V/E C P D V F R(N)                | C.Carbonium methylation             | 137.93 | 670.4033 | 1339.683 | -0.0094  | -7    | 8.59 | 45223.7  | 6.03  | HUMAN | Q8T8X-3  | Isomorph 3 of Phosphatidylinositol 5-phosphate 4-kinase type 2 gamma                     |
| 24762 | dirMS_041712_NAR_20mM_minus.9847.9847.2    | 3.72 | 1.136E+04 | M903m | (K)DCYPR(K) C M/R/R/L Y D V E R(K)                | C.Carbonium methylation mDnaE2      | 144.63 | 840.8764 | 1664.070 | -0.0073  | -9.9  | 8.99 | 139068.9 | 8.77  | HUMAN | BAD474   | DNA mismatch repair protein Msh6                                                         |
| 24763 | dirMS_041712_NAR_40mM_plus.15430.15430.3   | 3.72 | 3.01E+05  |       | (R)IGGPNR(K)G P W V I T L A Q V I Q D P V S R(I)T | 1.Nucleotide biosynthesis (T)       | 178.45 | 522.352  | 1065.040 | 0.0028   | 6.6   | 5.96 | 45481.2  | 7.85  | HUMAN | ETL096   | Casex kinase II subunit alpha                                                            |
| 24764 | dirMS_041712_NAR_40mM_minus.9530.9530.3    | 3.72 | 0.167E+05 | M84m  | (K)PHIEGH(K)Y P P E G G I I T N W/D D m(K)        | mDnaE2 methionine                   | 138.73 | 659.6395 | 1960.911 | 15.993   | -1    | 4.31 | 32616.5  | 5.18  | HUMAN | AN6176   | Actin, alpha skeletal muscle                                                             |
| 24765 | dirMS_041712_NAR_50mM_minus.11544.11544.3  | 3.72 | 1.969E+04 |       | (K)EIEGGV(K) E E G G Y K I R L C L K E(K)         | C.Carbonium methylation             | 134.38 | 489.2711 | 1465.783 | 0.0156   | 10.6  | 8.5  | 50792.4  | 6.34  | HUMAN | FRM793   | Peroxisomal NADH pyrophosphatase NUDT12                                                  |
| 24766 | dirMS_041712_NAR_50mM_minus.11871.11871.3  | 3.72 | 1.160E+05 | M234m | (K)ITMDDA(K)T M T D V V G N P E E E R(A)          | mDnaE2 methionine                   | 155.73 | 550.2583 | 1632.765 | -0.0087  | -3.1  | 4.41 | 37190.7  | 6.16  | HUMAN | FRWQ4Q   | SMN2/SMN1-related motor-associated catalytic regulator of chromatin subfamily D member 1 |
| 24767 | dirMS_041712_NAR_50mM_plus.17307.17307.3   | 3.72 | 1.155E+05 | M234m | (K)KLVKGL(K)K L V E A L V S R L G G K G(K)        | 1.Nucleotide biosynthesis (T)       | 141.81 | 578.8821 | 1481.92  | 0.0074   | 6.1   | 6.71 | 21205.4  | 6.71  | HUMAN | Q96022   | Phosphatidylinositol 4,5-bisphosphate 3-kinase catalytic subunit beta isoform            |
| 24768 | dirMS_041712_NAR_50mM_minus.14505.14505.3  | 3.72 | 0.618E+04 |       | (K)KVALML(K)K V A L L L L Q Q S A S P H A A A(K)  | mDnaE2 methionine                   | 150.53 | 558.7883 | 1674.954 | -0.0034  | -2    | 6.71 | 48283.6  | 6.07  | HUMAN | O12595   | Clintoxin A-3                                                                            |
| 24769 | dirMS_041712_NAR_60mM_minus.11012.11012.3  | 3.72 | 0.973E+03 | M363m | (K)GSHndw(K)G H n D W V m D V A N S N R(K)        | m.Nucleotide biosynthesis (Gln-iso) | 121.62 | 640.2914 | 1699.786 | 219.074  | -0.2  | 5.21 | 53875.2  | 7.03  | HUMAN | Q62M56   | WD repeat-containing protein 88                                                          |
| 24770 | dirMS_041712_NAR_60mM_minus.7163.7163.3    | 3.72 | 0.173E+05 |       | (R)TVGPNR(R) T V G P N S S G I G A P R(K)         | mDnaE2 methionine                   | 99.07  | 425.2172 | 1273.65  | -0.0125  | -9.8  | 9.72 | 91877.7  | 6.48  | HUMAN | BAD42N   | FYI-binding protein                                                                      |
| 24771 | dirMS_041712_NAR_60mM_minus.7911.7911.3    | 3.72 | 1.186E+06 | M479m | (R)KHEEER(K)E E E V L N L A R(K)                  | mDnaE2 methionine                   | 107.37 | 486.908  | 1458.711 | -0.0017  | -1.1  | 4.68 | 55305.8  | 6.56  | HUMAN | G5EAS2   | Nuclear valosin-containing protein-like (Fragment)                                       |
| 24772 | dirMS_041712_NAR_120mM_plus.10725.10725.3  | 3.72 | 0.832E+05 |       | (K)RFRFGSR(P) F S G S P R A I A(K)                | mDnaE2 methionine                   | 108.87 | 429.2327 | 1285.69  | -0.0064  | -5    | 8.75 | 81396    | 9.01  | HUMAN | AI1443   | Protein FAM22F                                                                           |
| 24773 | dirMS_041712_NAR_120mM_plus.11745.11745.3  | 3.72 | 1.148E+05 |       | (K)RGVGVN(K)R V F V M Q/V M Q E P V(K)            | mDnaE2 methionine                   | 114.45 | 435.5647 | 1304.678 | 0.0016   | 1.2   | 8.75 | 36396.8  | 5.02  | HUMAN | PO5198   | Eukaryotic translation initiation factor 2 subunit 1                                     |
| 24774 | dirMS_041712_NAR_20mM_plus.15617.15617.2   | 3.72 | 0.627E+04 |       | (K)YVLENN(K)V F I L N I R(D)                      | mDnaE2 methionine                   | 179.5  | 495.2908 | 989.578  | -0.0035  | -3.6  | 5.97 | 11367.1  | 11.36 | HUMAN | PE6205   | Histone H4                                                                               |
| 24775 | dirMS_041712_NAR_20mM_plus.13557.13557.2   | 3.72 | 1.304E+05 | K136k | (K)DWTRK(K)D W N T R E P N I(K)                   | 1.Nucleotide biosynthesis (T)       | 124.8  | 536.7758 | 954.495  | 114.0485 | 5.2   | 6.07 | 18317.8  | 6.19  | HUMAN | B7ZAC2   | Serine/threonine-protein phosphatase 6 catalytic subunit                                 |
| 24776 | dirMS_041712_NAR_30mM_plus.21622.21622.2   | 3.72 | 0.191E+05 |       | (R)ITWACR(R)I T W F I A G L S G Q F R(L)R         | 1.Nucleotide biosynthesis (T)       | 169.22 | 485.3749 | 1377.748 | -0.006   | -4.3  | 9.41 | 113800.5 | 9.18  | HUMAN | PR0874   | Poly (ADP-ribose) polymerase 1                                                           |
| 24777 | dirMS_041712_NAR_40mM_plus.6669.6669.2     | 3.72 | 0.519E+05 |       | (R)IFFSCK(R)R F/F/S/D Q K I(K)                    | C.Carbonium methylation             | 99.88  | 402.1734 | 803.339  | 0.0003   | 0.3   | 5.84 | 18511.8  | 5.62  | HUMAN | DR6R70   | Heterogeneous nuclear ribonucleoprotein H (Fragment)                                     |
| 24778 | dirMS_041712_NAR_40mM_plus.6869.6869.2     | 3.72 | 0.556E+03 |       | (R)SIVAAQ(R)S V/A/Q A Q E A R(L)                  | mDnaE2 methionine                   | 100.35 | 508.2775 | 1015.553 | -0.0054  | -5.3  | 6    | 537778   | 5.74  | HUMAN | Q15149   | Plectin                                                                                  |
| 24779 | dirMS_041712_NAR_40mM_plus.8006.8006.3     | 3.72 | 0.312E+04 |       | (R)SSGSSS(R)S S G S S Q/Q/Q S I G R(S)            | mDnaE2 methionine                   | 107.58 | 485.8998 | 1455.682 | 0.0026   | 1.8   | 9.47 | 73202    | 9.19  | HUMAN | C9JMU5   | Probable ATP-dependent RNA helicase DDX17                                                |
| 24780 | dirMS_041712_NAR_40mM_plus.8888.8888.2     | 3.72 | 0.185E+05 |       | (R)KQVDFG(R)K Q V D F G V L R(K)                  | mDnaE2 methionine                   | 114.9  | 567.0213 | 1213.152 | -0.0017  | -6.1  | 8.99 | 126019.9 | 8.19  | HUMAN | Q80625   | Actin, cytoplasmic 2, 4 terminally processed (Fragment)                                  |
| 24781 | dirMS_041712_NAR_50mM_plus.10455.10455.3   | 3.72 | 0.483E+04 |       | (R)KJSTGF(R)A S/E Y F G K W P D T A A(K)          | mDnaE2 methionine                   | 123.57 | 511.2769 | 1531.823 | -0.0066  | -4.8  | 8.79 | 64861.3  | 5.86  | HUMAN | BAD513   | Eukaryotic translation initiation factor 4B                                              |
| 24782 | dirMS_041712_NAR_50mM_plus.10472.10472.3   | 3.72 | 1.219E+05 |       | (K)SVEAAA(K)S V E A A E A L S R A D L K(E)        | mDnaE2 methionine                   | 122.65 | 477.9286 | 1431.769 | -0.0033  | -1.6  | 4.68 | 12313.5  | 11.14 | HUMAN | FS0K83   | Parathyromin                                                                             |
| 24783 | dirMS_041712_NAR_50mM_plus.12359.12359.3   | 3.72 | 0.116E+05 |       | (K)GKLYLC(K)P L/L A L C R P P D L K(K)            | C.Carbonium methylation             | 132.83 | 543.2913 | 1627.863 | -0.0031  | -1.9  | 8.59 | 64042.3  | 9.02  | HUMAN | Q8N1G4   | Leucine-rich repeat-containing protein 4                                                 |
| 24784 | dirMS_041712_NAR_50mM_plus.6581.6581.3     | 3.72 | 1.930E+04 | M797m | (R)KHEEER(K)E E E V L N L A R(K)                  | mDnaE2 methionine                   | 107.37 | 486.908  | 1458.711 | -0.0017  | -8.6  | 4.79 | 116622.7 | 6.42  | HUMAN | Q8N166   | Ankyrin repeat domain-containing protein 18A                                             |
| 24785 | dirMS_041712_NAR_50mM_plus.9047.9047.3     | 3.72 | 1.798E+04 | T220  | (R)IGLRLR(R)E L L R L W P D M A R Y(L)            | 1.Nucleotide biosynthesis (T)-iso   | 114.3  | 508.962  | 1575.81  | 219.0564 | 1.2   | 8.75 | 68223    | 9.61  | HUMAN | ETP55    | Nicotinic oxide synthase, brain                                                          |
| 24786 | dirMS_041712_NAR_60mM_plus.16995.16995.3   | 3.72 | 1.122E+05 | S623s | (R)SIVGHS(R)S V G H S I A S E I C(K)/G            | C.Carbonium methylation Lys-iso     | 145.77 | 473.9034 | 1216.599 | 203.0966 | 12.1  | 6.47 | 336378.7 | 9.73  | HUMAN | Q9N148   | Histone-lysine N-methyltransferase ASH1L                                                 |
| 24787 | dirMS_041712_NAR_60mM_plus.18023.18023.3   | 3.72 | 0.155E+05 |       | (K)ILLQPT(K) L L Q P T S S Y T T K(K)             | mDnaE2 methionine                   | 151.32 | 463.6084 | 1388     | 0.0111   | 8     | 8.75 | 192522.7 | 5.74  | HUMAN | Q9P129</ |                                                                                          |



|       |                                            |   |       |           |         |                                                     |                                               |        |          |          |          |       |         |          |       |        |                                                   |                                                                                                            |
|-------|--------------------------------------------|---|-------|-----------|---------|-----------------------------------------------------|-----------------------------------------------|--------|----------|----------|----------|-------|---------|----------|-------|--------|---------------------------------------------------|------------------------------------------------------------------------------------------------------------|
| 24848 | dirMS_041712_NAR_60mM_plus.10062.10062.3   | 3 | 3.7   | 1.371E-05 | 511535  | (KIVGRVRV)(K)G/V R V I Y D(S)K(R)                   | nAcetylglucosamine (S)                        | 11005  | 442.9125 | 1123.611 | 203.123  | 24.9  | 8.56    | 142137.5 | 9.17  | HUMAN  | F7ENJ4                                            | Enhancer of yellow 2 RNA-specific adenosine deaminase                                                      |
| 24849 | dirMS_041712_NAR_60mM_plus.10027.10027.2   | 3 | 3.7   | 0.385E-05 |         | (RHJSMH)(R)A H I S M W V G N L V P Q(A)             |                                               | 11474  | 684.3577 | 1307.71  | -0.019   | -1.4  | 8.8     | 41827.5  | 7     | HUMAN  | B7Z7A9                                            | Phosphoglycerate kinase                                                                                    |
| 24850 | dirMS_041712_NAR_60mM_plus.17152.17152.3   | 3 | 3.7   | 1.458E-05 |         | (KIGWTR)(K)G F K E L A G E L Q(A)K(Q)               |                                               | 6185   | 453.894  | 1054.6   | 0.000    | 0.8   | 32394.9 | 6.8      | 7     | HUMAN  | BT0224                                            | GTP-binding nuclear protein Ran                                                                            |
| 24851 | dirMS_041712_NAR_60mM_plus.5405.5405.3     | 3 | 3.7   | 0.238E-04 | M74mT25 | (KHSHHGH)(K)N n/H V N Q C A Q(L)R(D)                | mOctadecanoin-methionine-his-pro              | 8453   | 478.2118 | 1213.574 | 219.0466 | -19.3 | 6.75    | 98458.4  | 5.67  | HUMAN  | OS6GK5                                            | Serine/threonine-protein kinase greatwall                                                                  |
| 24852 | dirMS_041712_NAR_60mM_plus.5699.5699.3     | 3 | 3.7   | 2.138E-05 | 54225   | (KJESSVTK)(K)E S N/V K T W R S T(X)V(K)             | sPhosphorylation S                            | 8837   | 463.5601 | 1308.712 | 79.954   | -8.9  | 10      | 113840.7 | 9.67  | HUMAN  | BAE3L9                                            | Bromodomain-containing protein 1                                                                           |
| 24853 | dirMS_041712_NAR_60mM_plus.7268.7268.2     | 3 | 3.7   | 0.506E-05 |         | (RHGKAPR)(R)G V/P A P D F(K)K                       |                                               | 95.78  | 468.7793 | 972.551  | 0.0      | 0     | 8.59    | 15252.2  | 5.82  | HUMAN  | AN6W55                                            | Peroridin-2, isoform CRA_a                                                                                 |
| 24854 | dirMS_041712_NAR_60mM_plus.8083.8083.3     | 3 | 3.7   | 1.272E-05 | 98b     | (KVLVDR)(K)R V/D V/P P A(R)K                        | mAcetylglucosamine (S)                        | 100.88 | 453.894  | 1054.6   | 0.000    | 0.8   | 32394.9 | 6.8      | 7     | HUMAN  | BT0224                                            | GTP-binding nuclear protein Ran                                                                            |
| 24855 | dirMS_041712_NAR_60mM_plus.8905.8905.3     | 3 | 3.7   | 7.111E-05 |         | (RIQLGLQ)(R)D LQ/QA/QYE AVA Q R(K)                  |                                               | 100.87 | 461.9268 | 1383.77  | -0.004   | -3.2  | 8.75    | 53377.8  | 5.74  | HUMAN  | Q15149                                            | Plectin                                                                                                    |
| 24856 | dirMS_041712_NAR_120mM_minus.13715.13715.3 | 3 | 3.659 | 0.419E-04 | N3m     | (KNIJFSDT)(K)N L F S D T E T E R(K)                 |                                               | 129.23 | 526.5672 | 1374.617 | 203.0668 | -6    | 4.14    | 117616.3 | 9.59  | HUMAN  | AZ4341                                            | Synaptonemal complex protein 2 (Fragment)                                                                  |
| 24857 | dirMS_041712_NAR_120mM_minus.6783.6783.2   | 3 | 3.69  | 1.231E-05 |         | (RHKTGTE)(R)K T E T V S/E/M/N(R)(R)                 |                                               | 91.52  | 403.5363 | 1208.594 | -0.004   | -0.3  | 5.81    | 37296.3  | 5.3   | HUMAN  | F8VJ64                                            | Keratin, type II cytoskeletal 8                                                                            |
| 24858 | dirMS_041712_NAR_120mM_minus.7326.7326.3   | 3 | 3.69  | 1.138E-05 |         | (RHGATEE)(R)K Q A T E V R T M V(K)                  |                                               | 94.07  | 402.2156 | 1204.647 | -0.001   | -12   | 9.6     | 71222.8  | 9.49  | HUMAN  | DAQ203                                            | C-terminal-620AA lysine-specific demethylase 2A                                                            |
| 24859 | dirMS_041712_NAR_20mM_plus.14488.14488.3   | 3 | 3.69  | 2.194E-05 |         | (RHLKAL)(R)K A L V S A T R Q G(A)A T A R(V)         |                                               | 159.73 | 465.9217 | 1688.902 | -0.027   | -1.6  | 6.17    | 54200.7  | 1.9   | HUMAN  | EP1017                                            | Epopkin                                                                                                    |
| 24860 | dirMS_041712_NAR_30mM_minus.9043.9043.2    | 2 | 3.69  | 0.654E-04 | M68mT27 | (RNLNLM)(R)N L A/M G V N N T S m S(K)               | mOctadecanoin methionine                      | 139.73 | 699.34   | 1365.687 | 31.862   | -2.6  | 8.75    | 29110.6  | 4.57  | HUMAN  | P12004                                            | Proliferating cell nuclear antigen                                                                         |
| 24861 | dirMS_041712_NAR_30mM_minus.8374.8374.2    | 2 | 3.69  | 0.316E-05 |         | (KJELGDFP)(K)K L Q/S T F/K(I)                       |                                               | 100.22 | 426.7259 | 852.446  | -0.016   | -1.9  | 6.1     | 26810.9  | 5.15  | HUMAN  | Q86C19                                            | EF-hand domain-containing protein D2                                                                       |
| 24862 | dirMS_041712_NAR_50mM_minus.10563.10563.3  | 3 | 3.69  | 0.177E-05 |         | (RIVAFEL)(R)E A/F I L Y Q L E L(K)                  |                                               | 128.57 | 494.6088 | 1481.789 | 0.012    | 11.6  | 4.25    | 11219.9  | 5.71  | HUMAN  | Q75660                                            | Isoform 3 of Oral-facial-digital syndrome 1 protein                                                        |
| 24863 | dirMS_041712_NAR_50mM_minus.5724.5724.3    | 3 | 3.69  | 0.240E-05 |         | (KATCAQ)(K)A T Y C A P Q H G A P G P G P D A S K(K) | C-Carboxymethylation                          | 93.82  | 507.29   | 1780.829 | -0.002   | -3.4  | 6.79    | 83264.1  | 6.04  | HUMAN  | EP9F00                                            | Filamin-A                                                                                                  |
| 24864 | dirMS_041712_NAR_50mM_minus.8588.8588.3    | 3 | 3.69  | 1.234E-05 |         | (RIVAFEL)(R)E A/V P E G P R E N D G P(K)            | C-Carboxymethylation                          | 117.37 | 611.2923 | 1831.864 | -0.002   | -1.1  | 4.41    | 36856.1  | 8.55  | HUMAN  | HOY1A4                                            | Sorbitol dehydrogenase                                                                                     |
| 24865 | dirMS_041712_NAR_60mM_minus.6958.6958.3    | 3 | 3.69  | 1.634E-04 |         | (RJDSDGR)(R)D S G R S V D S/G S D A(L)R(S)          |                                               | 97.03  | 560.916  | 1680.742 | -0.005   | -5.1  | 4.14    | 50974.6  | 5.31  | HUMAN  | BM5E91                                            | Programmed cell death protein 4                                                                            |
| 24866 | dirMS_041712_NAR_120mM_plus.5566.5566.3    | 3 | 3.69  | 1.376E-05 |         | (KTCESSE)(R)T C E R E S F Y F(K)                    | C-Carboxymethylation                          | 82.18  | 435.1877 | 1303.541 | 0.008    | 6.1   | 5.81    | 10576.1  | 11.44 | HUMAN  | EP9F08                                            | Neutral alpha-glucosidase AB                                                                               |
| 24867 | dirMS_041712_NAR_120mM_plus.8054.8054.3    | 3 | 3.69  | 1.248E-05 |         | (RIURCEEL)(R)R E C L S P P V W(R)(R)                |                                               | 100.87 | 477.2447 | 1429.722 | -0.021   | -1.5  | 6.14    | 57188.9  | 5.97  | HUMAN  | HTC241                                            | Serratia RIA effector molecule homolog (Fragment)                                                          |
| 24868 | dirMS_041712_NAR_20mM_plus.11222.11222.2   | 2 | 3.69  | 1.463E-04 | N47m38  | (RSTKQK)(K)S T I E K (L)D S V Q L(K)                | mOctadecanoin methionine                      | 105.00 | 650.352  | 1176.622 | 203.0892 | 7.1   | 8.31    | 90363.7  | 9.71  | HUMAN  | Q14241                                            | Transcription elongation factor B polypeptide 3                                                            |
| 24869 | dirMS_041712_NAR_20mM_plus.11737.11737.2   | 2 | 3.69  | 0.609E-03 | M40m2m  | (RIMAFGA)(R)M A I F A T D L V(K)K(I)                | mOctadecanoin methionine                      | 153.78 | 534.7743 | 1052.545 | 15.9568  | 1.8   | 5.59    | 87447.6  | 6.44  | HUMAN  | Q15347                                            | Protein transport protein Sec2B                                                                            |
| 24870 | dirMS_041712_NAR_20mM_plus.14932.14932.2   | 2 | 3.69  | 1.939E-04 |         | (RFTTTCV)(R)R T T K V C S V T W(K)                  | C-Carboxymethylation                          | 173.5  | 585.8066 | 1170.619 | -0.018   | -10.9 | 10      | 53325.9  | 8.4   | HUMAN  | B7Z3P4                                            | Dimethylamine monoxygenase (N-oxide-forming) 1                                                             |
| 24871 | dirMS_041712_NAR_20mM_plus.15806.15806.2   | 2 | 3.69  | 0.110E-05 |         | (RIGFLPDR)(R)T P L I S P R L(K)                     |                                               | 180.75 | 515.8306 | 1038.656 | -0.018   | -1.8  | 8.75    | 27046.1  | 6.01  | HUMAN  | FA9327                                            | Fatty acid synthase                                                                                        |
| 24872 | dirMS_041712_NAR_30mM_plus.11226.11226.2   | 2 | 3.69  | 3.556E-05 |         | (KIKGQW)(K)I E C G W Q(K)                           | C-Carboxymethylation                          | 116.55 | 463.2869 | 905.455  | 0.116    | 6     | 6.239.3 | 9.99     | HUMAN | EP9F00 | Enhancer of yellow 2 transcription factor homolog |                                                                                                            |
| 24873 | dirMS_041712_NAR_30mM_plus.15888.15888.2   | 2 | 3.69  | 0.422E-05 |         | (RIMGNPN)(R)M G/P N V I E R(I)                      |                                               | 136.4  | 546.7844 | 1092.551 | 0.109    | 10    | 5.75    | 8641.9   | 9.77  | HUMAN  | CJUD58                                            | Protein NipSnap homolog 1 (Fragment)                                                                       |
| 24874 | dirMS_041712_NAR_30mM_plus.18443.18446.2   | 2 | 3.69  | 0.164E-04 |         | (KIVNSNL)(K)V V I N S I L A F R(K)                  |                                               | 149.52 | 509.8031 | 1018.604 | -0.005   | -5.4  | 9.72    | 56564.1  | 6.56  | HUMAN  | BD4N0W                                            | Aminoacylase-1                                                                                             |
| 24875 | dirMS_041712_NAR_30mM_plus.21873.21873.2   | 2 | 3.69  | 0.875E-04 |         | (KJGLVQA)(K)G L V Q A(L)G S N S F R(Q)              |                                               | 169.97 | 738.3989 | 1475.796 | -0.006   | -4.1  | 9.75    | 36914.7  | 6.33  | HUMAN  | P14550                                            | Alkyl alcohol dehydrogenase (NADP+)                                                                        |
| 24876 | dirMS_041712_NAR_30mM_plus.24031.4031.2    | 2 | 3.69  | 5.767E-05 | M29m39  | (KJGKQD)(K)H V D I L A I P T W Q D E L A L E(K)     | C-Carboxymethylation-mOctadecanoin methionine | 151.82 | 469.1219 | 1066.126 | -0.003   | -4.0  | 6.78    | 4231.9   | 6.03  | HUMAN  | Q86C19                                            | Tubulin alpha-3B chain protein LOC630334                                                                   |
| 24877 | dirMS_041712_NAR_30mM_plus.2580.2580.2     | 2 | 3.69  | 0.207E-05 |         | (KJLDGYE)(K)D L Y D Y Q E R(K)                      |                                               | 105.42 | 469.1219 | 938.421  | 0.003    | 9.9   | 4.03    | 20235.4  | 6.77  | HUMAN  | EP9A19                                            | Capsrin-1 (Fragment)                                                                                       |
| 24878 | dirMS_041712_NAR_40mM_plus.12689.12689.2   | 2 | 3.69  | 0.193E-04 |         | (KJCSWNV)(K)C J S W N V D G R L(K)                  | C-Carboxymethylation                          | 141.22 | 610.297  | 1219.589 | -0.001   | -1.7  | 5.84    | 19395.5  | 5.38  | HUMAN  | GV3559                                            | DNA-(apurinic or apyrimidinic site) lyase (Fragment)                                                       |
| 24879 | dirMS_041712_NAR_40mM_plus.17924.17924.3   | 3 | 3.69  | 0.494E-04 |         | (KIDMTVR)(K)M D I T V P I L V S K P P F T G(K)      |                                               | 173.25 | 610.3443 | 1829.024 | -0.008   | -3.2  | 8.59    | 53885.5  | 9     | HUMAN  | P11182                                            | Lipoamide acyltransferase component of branched-chain alpha-keto acid dehydrogenase complex, mitochondrial |
| 24880 | dirMS_041712_NAR_40mM_plus.2305.2305.2     | 2 | 3.69  | 0.905E-05 |         | (RHSQD)(R)S Q D A I P P A A T V M G(K)              |                                               | 109.65 | 480.2001 | 799.2019 | -0.009   | -4.1  | 8.7     | 8953.2   | 6.4   | HUMAN  | EP9F00                                            | Filamin-A                                                                                                  |
| 24881 | dirMS_041712_NAR_40mM_plus.8305.8305.2     | 2 | 3.69  | 6.855E-03 |         | (KIVGQMO)(K)V G Q M Q/L R(Q)                        |                                               | 108.97 | 472.7655 | 944.535  | -0.109   | -11.5 | 9.72    | 117805.4 | 8.78  | HUMAN  | F7E017                                            | WASH complex subunit strumplein                                                                            |
| 24882 | dirMS_041712_NAR_40mM_plus.2859.2859.2     | 2 | 3.69  | 0.131E-05 |         | (KJDFSTTT)(K)D F S T T T L(K)                       |                                               | 111.85 | 400.2001 | 799.383  | 0.0097   | 12.1  | 5.84    | 31652.5  | 9.88  | HUMAN  | Q8N319                                            | Zinc finger protein 664                                                                                    |
| 24883 | dirMS_041712_NAR_50mM_plus.13554.13554.3   | 3 | 3.69  | 1.368E-05 |         | (RISJLANA)(R)S L J A/M L V A A N S C Y(K)(K)        |                                               | 139    | 512.9444 | 1536.82  | -0.016   | -1.1  | 9.7     | 36978.6  | 6.33  | HUMAN  | B72800                                            | Adenosine kinase                                                                                           |
| 24884 | dirMS_041712_NAR_50mM_plus.12983.12983.3   | 3 | 3.69  | 2.239E-05 | N139n   | (RHSJSM)(R)S J S A A T T T K G P E G(K)             | nAcetylglucosamine (N)                        | 109.8  | 602.3071 | 1601.813 | 203.0398 | 8     | 8.59    | 12979.4  | 9.88  | HUMAN  | H78290                                            | Histone H9-N-methyltransferase, H3 lysine 79-specific (Fragment)                                           |
| 24885 | dirMS_041712_NAR_50mM_plus.20222.20222.3   | 3 | 3.69  | 0.234E-05 |         | (KJGHQD)(K)H V D I L A I P T W Q D E L A L E(K)     |                                               | 174.63 | 635.3636 | 1904.049 | -0.005   | -1.3  | 4.65    | 83400.6  | 6.45  | HUMAN  | Q82499                                            | ATP-dependent RNA helicase DDX1                                                                            |
| 24886 | dirMS_041712_NAR_50mM_plus.21332.21332.3   | 3 | 3.69  | 1.525E-05 | M145m   | (RIGVLM)(R)E V m I V A D V A I I A E L K(Q)         | mOctadecanoin methionine                      | 182.27 | 524.9717 | 1556.908 | 15.925   | -1.5  | 6.07    | 25225.7  | 9.52  | HUMAN  | F7E5H4                                            | 60 kDa heat shock protein, mitochondrial (Fragment)                                                        |
| 24887 | dirMS_041712_NAR_50mM_plus.2883.2883.3     | 3 | 3.69  | 0.180E-05 |         | (KJIVPEP)(K)T P V E P A/V H R(I)                    |                                               | 113.98 | 416.5627 | 1247.674 | -0.007   | -0.6  | 5.37    | 5429.1   | 9.16  | HUMAN  | ESR1P1                                            | 40S ribosomal protein S20                                                                                  |
| 24888 | dirMS_041712_NAR_20mM_minus.10059.10059.2  | 2 | 3.68  | 0.124E-05 |         | (RIVLVDY)(R)I V A D V I Y T E T(K)                  |                                               | 150.82 | 669.3156 | 1337.266 | -0.021   | -1.5  | 4.37    | 22956    | 8.88  | HUMAN  | EP9K25                                            | Cofilin-1                                                                                                  |
| 24889 | dirMS_041712_NAR_30mM_plus.19304.19304.2   | 2 | 3.68  | 1.133E-05 |         | (RHSVDFE)(R)S V D S G R S V D S(G)S D A(L)R(S)      |                                               | 159.2  | 612.2218 | 1521.461 | -0.002   | -1.1  | 5.72    | 21561.2  | 6.44  | HUMAN  | EP9F00                                            | Tubulin alpha-4A chain (Fragment)                                                                          |
| 24890 | dirMS_041712_NAR_40mM_plus.11599.11599.3   | 3 | 3.68  | 1.106E-05 |         | (RINFEPTA)(R)I N F E P T A A I A Y G L D K(V)       |                                               | 152.32 | 596.6701 | 1787.99  | -0.004   | -1.9  | 6.07    | 17973.8  | 5.16  | HUMAN  | EP9E65                                            | Heat shock cognate 71 chain (Fragment)                                                                     |
| 24891 | dirMS_041712_NAR_50mM_minus.17117.17117.3  | 3 | 3.68  | 1.774E-04 |         | (RHYEYVE)(R)D E I V E K V S/A Y I K(K)              |                                               | 166.15 | 519.6448 | 1556.821 | 0.0092   | 5.9   | 4.68    | 50811.6  | 9.32  | HUMAN  | Q05639                                            | Elongation factor 1-alpha 2                                                                                |
| 24892 | dirMS_041712_NAR_60mM_plus.12298.12298.3   | 3 | 3.68  | 1.793E-05 |         | (KJAVICLS)(K)A V F C L S A D K(K)                   | C-Carboxymethylation                          | 127.92 | 417.9007 | 1251.677 | 0.011    | 8.8   | 8.64    | 15739.2  | 9.3   | HUMAN  | F8RFD5                                            | Destrin                                                                                                    |
| 24893 | dirMS_041712_NAR_60mM_plus.12903.12903.3   | 3 | 3.68  | 1.159E-05 |         | (RHSVDFE)(R)S V D S G R S V D S(G)S D A(L)R(S)      |                                               | 131.57 | 524.9451 | 1521.461 | -0.002   | -11.3 | 4.55    | 20111    | 4.47  | HUMAN  | HM9265                                            | Acidic leucine-rich nuclear phosphoprotein 32 family member A                                              |
| 24894 | dirMS_041712_NAR_60mM_plus.15422.15422.3   | 3 | 3.68  | 0.311E-04 |         | (RIGLGGRL)(R)G L L F E S P S/E L S V S R(T)         |                                               | 144.78 | 595.6552 | 1784.95  | 0.0009   | 0.5   | 6.14    | 9248     | 8.73  | HUMAN  | HOY679                                            | Coiled-coil domain-containing protein 36 (Fragment)                                                        |
| 24895 | dirMS_041712_NAR_60mM_plus.7323.7323.3     | 3 | 3.685 | 0.204E-05 | S3265   | (KJIVANSL)(K)I V A S N L V T G P L(K)               | sPhosphorylation S                            | 100.47 | 443.2376 | 1211.736 | 79.9624  | -3    | 8.75    | 62245.9  | 5.34  | HUMAN  | QBW828                                            | Oncoprotein-induced transcritpion protein 8E (Fragment)                                                    |
| 24896 | dirMS_041712_NAR_20mM_plus.10469.10469.3   | 3 | 3.68  | 0.588E-04 |         | (RDEWDEK)(R)E V D E Q M L V N Q N(K)                |                                               | 104.49 | 482.9    | 1446.689 | -0.039   | -2.7  | 4.14    | 40069.4  | 4.83  | HUMAN  | F7EVR1                                            | Tubulin beta chain                                                                                         |
| 24897 |                                            |   |       |           |         |                                                     |                                               |        |          |          |          |       |         |          |       |        |                                                   |                                                                                                            |



|       |                                            |   |      |           |                                     |                                                          |                       |          |          |          |          |       |         |          |       |        |                                      |                                                                                                       |
|-------|--------------------------------------------|---|------|-----------|-------------------------------------|----------------------------------------------------------|-----------------------|----------|----------|----------|----------|-------|---------|----------|-------|--------|--------------------------------------|-------------------------------------------------------------------------------------------------------|
| 25066 | dirMS_D41712_NAR_40mM_plus2.9736.9736.2    | 2 | 3.63 | 0.165E+05 | (RRPCTLR(R)R P C T L S L E / L E I) | C.Carbonmethylation                                      | 12003                 | 552.7699 | 1104.535 | -0.0029  | -2.6     | 4.85  | 61333.4 | 5.7      | HUMAN | P13674 | Prolyl 4-hydroxylase subunit alpha-1 |                                                                                                       |
| 25067 | dirMS_D41712_NAR_50mM_plus2.1135.1135.3    | 3 | 3.63 | 1.280E+06 | M72m                                | (RTIEMER(R)T E m E N E F V / V L N K D)                  | m.Oxidized methionine | 12798    | 499.5943 | 1480.772 | 15.9928  | 1.2   | 4.78    | 13588.1  | 4.66  | HUMAN  | FBV07                                | Keratin, type II cytoskeletal 8 (Fragment)                                                            |
| 25068 | dirMS_D41712_NAR_50mM_plus2.1597.1597.1    | 3 | 3.63 | 1.138E+05 |                                     | (RIGVIAE(R)R V A A K L E / I S D D I A I K S)            | m.Oxidized methionine | 11718    | 585.9539 | 1751.156 | -0.0119  | -6.6  | 6.08    | 24715.5  | 4.96  | HUMAN  | HMW49                                | Alpha-transfer flavoprotein subunit alpha, mitochondrial                                              |
| 25069 | dirMS_D41712_NAR_50mM_plus2.21267.21267.3  | 3 | 3.63 | 1.656E+05 | M145m                               | (RIGVIAE(R)R V m V A A D V N M / E A L K S K I)          | m.Oxidized methionine | 11985    | 524.917  | 1556.908 | 15.9928  | -1.5  | 6.07    | 25225.7  | 9.52  | HUMAN  | E7E34                                | 60 kDa heat shock protein, mitochondrial (Fragment)                                                   |
| 25070 | dirMS_D41712_NAR_50mM_plus2.6549.6549.3    | 3 | 3.63 | 0.380E+05 | S76                                 | (RISLGLAG(R)R/E L L G A G G N G V V T K V)               | n.vNepyt(lysine)S1    | 1003     | 502.2651 | 1301.706 | 203.0748 | -3    | 6       | 44708.6  | 6.12  | HUMAN  | P3507                                | Dual specificity mitogen-activated protein kinase 2                                                   |
| 25071 | dirMS_D41712_NAR_50mM_plus2.7170.7170.3    | 3 | 3.63 | 1.750E+04 |                                     | (KIDSTNY(R)K)I S T M Y V A S Q K K T)                    | m.Oxidized methionine | 10352    | 473.2382 | 1417.696 | 0.0043   | 3     | 8.43    | 17045.4  | 4.25  | HUMAN  | HOYV0                                | Endoplasmic (Fragment)                                                                                |
| 25072 | dirMS_D41712_NAR_50mM_plus2.8755.8755.3    | 3 | 3.63 | 0.201E+05 |                                     | (KIVYDQA(R)R V S E V A S G D S M T A L T D D G K)        | m.Oxidized methionine | 11243    | 633.6539 | 1889.92  | 0.0179   | -2.4  | 4.41    | 29532.8  | 9.49  | HUMAN  | CS180                                | Regulator of chromosome condensation (Fragment)                                                       |
| 25073 | dirMS_D41712_NAR_60mM_plus2.20018.20018.3  | 3 | 3.63 | 1.600E+05 |                                     | (KILUHPYK(R)K L V L M V Q L L Q L K)                     | m.Oxidized methionine | 16448    | 430.2695 | 1283.799 | -0.0048  | -3.7  | 6.74    | 45578.2  | 7.83  | HUMAN  | B4D1E                                | Isocitrate dehydrogenase [NADP]                                                                       |
| 25074 | dirMS_D41712_NAR_60mM_plus2.5592.5592.2    | 2 | 3.63 | 0.483E+04 |                                     | (KJADSQL(K)K)A D S Q L V Q P H G G D L T K A)            | m.Oxidized methionine | 87.62    | 731.8625 | 1466.723 | -0.0057  | -3.9  | 5.21    | 134614.7 | 8.76  | HUMAN  | P5126                                | AFA/FMR2 family member 3                                                                              |
| 25075 | dirMS_D41712_NAR_60mM_plus2.7388.7388.3    | 3 | 3.63 | 1.193E+06 |                                     | (RISXKSK(R)S/E V E K I V D S E E G F A K)                | m.Oxidized methionine | 96.48    | 452.5501 | 1355.632 | 0.0032   | 2.4   | 4.41    | 74262.2  | 9.53  | HUMAN  | P23246                               | Splicing factor, proline- and glutamine-rich                                                          |
| 25076 | dirMS_D41712_NAR_120mM_minus.10389.10389.3 | 3 | 3.62 | 1.608E+05 | M142m                               | (KIVSOGM(R)K)K E G E N V V I A V M E R I F)              | m.Oxidized methionine | 110.1    | 507.9186 | 1505.745 | 15.9928  | 0.8   | 4.79    | 18240.4  | 7.96  | HUMAN  | P6273                                | Peptidyl-prolyl-co-trans isomerase A                                                                  |
| 25077 | dirMS_D41712_NAR_120mM_minus.1122.1122.3   | 3 | 3.62 | 2.09E+04  |                                     | (KIVSFGK(R)K)E G G I G P L V A V G D V K)                | C.Carbonmethylation   | 106.5    | 548.216  | 1243.62  | -0.0125  | -9.9  | 9.99    | 13912.9  | 9.06  | HUMAN  | MS22                                 | Protein MS22-2                                                                                        |
| 25078 | dirMS_D41712_NAR_120mM_minus.8481.8481.2   | 2 | 3.62 | 0.225E+05 |                                     | (RHSVGVV(R)R)S/V G V V V I G R I S)                      | m.Oxidized methionine | 10023    | 462.2742 | 923.542  | -0.001   | -1.1  | 9.75    | 73399.3  | 6.86  | HUMAN  | Q9245                                | Far upstream element-binding protein 2                                                                |
| 25079 | dirMS_D41712_NAR_20mM_minus.8417.8417.2    | 2 | 3.62 | 0.110E+05 |                                     | (RIGVSTTR(R)R)Y V S F T T T A E R I S)                   | m.Oxidized methionine | 133.33   | 566.771  | 1132.527 | 0.0078   | 6.9   | 6       | 23901.9  | 5.28  | HUMAN  | IL3L19                               | Actin, cytoplasmic 2, N-terminally processed (Fragment)                                               |
| 25080 | dirMS_D41712_NAR_30mM_minus2.16058.16058.2 | 2 | 3.62 | 1.107E+05 | M89m                                | (KAFSGDK(R)K)A F I S G I K m S T A R K)                  | m.Oxidized methionine | 91.44    | 578.811  | 1140.608 | 16.0066  | 10.1  | 10      | 17799.4  | 9.3   | HUMAN  | C9S11                                | U2 snRNP-associated SURP motif-containing protein                                                     |
| 25081 | dirMS_D41712_NAR_30mM_minus2.16370.16370.2 | 2 | 3.62 | 0.135E+05 |                                     | (KSTPLN(K)S)T I V A L V L K I Q)                         | C.Carbonmethylation   | 142.7    | 467.165  | 921.54   | -0.0053  | -5.7  | 8.47    | 23232.7  | 5.07  | HUMAN  | D6KCP9                               | Deoxyribosyl transferase                                                                              |
| 25082 | dirMS_D41712_NAR_30mM_minus2.7084.7084.2   | 2 | 3.62 | 0.124E+05 |                                     | (KICATPR(K)K)A T V / P D / E R I K)                      | m.Oxidized methionine | 93.68    | 517.3048 | 1034.482 | 0.0      | 0     | 4.37    | 17833.3  | 8.73  | HUMAN  | C9J46                                | Isocitrate dehydrogenase [NADP] cytoplasmic (Fragment)                                                |
| 25083 | dirMS_D41712_NAR_30mM_minus2.7831.7831.2   | 2 | 3.62 | 0.543E+05 |                                     | (RJAAMGR(R)A)A M / G P G I S I R K M)                    | m.Oxidized methionine | 96.53    | 430.2325 | 859.445  | 0.0123   | 14.3  | 9.79    | 22167.3  | 10.15 | HUMAN  | E7EN8                                | Phosphoglucomutase                                                                                    |
| 25084 | dirMS_D41712_NAR_30mM_minus2.9943.9943.2   | 2 | 3.62 | 1.663E+05 | K137k                               | (KITSNNGE(R)K)S N N / G G G L G K R I M)                 | l.kitiquin-6          | 107.68   | 573.7932 | 1032.541 | 114.0359 | -6.2  | 10      | 50196.6  | 5.04  | HUMAN  | FBWAA1                               | SAM domain-containing protein SAMSN-1                                                                 |
| 25085 | dirMS_D41712_NAR_40mM_minus2.12681.12681.3 | 3 | 3.62 | 0.255E+03 | K54k                                | (KIEFIPSS(K)R)F / P I S S T P V S L V P R I T)           | m.Oxidized methionine | 157.08   | 608.3307 | 1711.959 | 114.0107 | -13.3 | 8.85    | 84737.7  | 8.33  | HUMAN  | Q8R50                                | Forhead box protein M1                                                                                |
| 25086 | dirMS_D41712_NAR_50mM_minus2.11682.11682.3 | 3 | 3.62 | 1.030E+05 |                                     | (KJADHDK(R)K)H D L V L V G G S T R I K)                  | m.Oxidized methionine | 134.6    | 485.2711 | 1465.812 | -0.0134  | -9.1  | 6.79    | 90126    | 5.44  | HUMAN  | E7E94                                | Heat shock 70 kDa protein 1A/1B                                                                       |
| 25087 | dirMS_D41712_NAR_50mM_minus2.16173.16173.3 | 3 | 3.62 | 1.158E+05 |                                     | (KISMPEV(R)K)M / S P V D / L N / V L K P I M)            | m.Oxidized methionine | 16003    | 514.2852 | 1540.84  | 0.0007   | 0.5   | 6.07    | 629603.7 | 5.8   | HUMAN  | Q0966                                | Neuroblast differentiation-associated protein ANNAK                                                   |
| 25088 | dirMS_D41712_NAR_60mM_minus.17661.17661.3  | 3 | 3.62 | 0.117E+05 |                                     | (RIGVGHV(R)G)H V H V E Q / A / G / E / L Q / R I A)      | m.Oxidized methionine | 159.38   | 555.2959 | 1663.876 | 0.0031   | -1.8  | 4.75    | 106088.3 | 5.78  | HUMAN  | P10275                               | Androgen receptor                                                                                     |
| 25089 | dirMS_D41712_NAR_60mM_minus.17765.17765.3  | 3 | 3.62 | 1.373E+05 |                                     | (KIGKVEV(R)K)G K L E N V I L L Q L K S)                  | m.Oxidized methionine | 158.52   | 496.9631 | 1488.878 | -0.0037  | -2.5  | 8.5     | 482683.6 | 6.07  | HUMAN  | IG2955                               | Amylin-3                                                                                              |
| 25090 | dirMS_D41712_NAR_60mM_minus.17841.17841.3  | 3 | 3.62 | 1.095E+05 | M148m                               | (RILUAGR(R)K)D / A / R / R / L / D / V L K I Q)          | m.Oxidized methionine | 159.53   | 547.2829 | 1623.841 | 15.9931  | -1.1  | 4.43    | 37482.1  | 5.36  | HUMAN  | E9R30                                | Actin, gamma-enteric smooth muscle                                                                    |
| 25091 | dirMS_D41712_NAR_60mM_minus.18626.18626.3  | 3 | 3.62 | 1.400E+04 |                                     | (RISLAAAR(R)R)S L / A / A / P G T / G A L N S R I K)     | m.Oxidized methionine | 166.75   | 541.9639 | 1623.881 | -0.0041  | -2.6  | 9.47    | 27747.5  | 12.09 | HUMAN  | Q8NS50                               | Hypothetical gene supported by BC031673                                                               |
| 25092 | dirMS_D41712_NAR_60mM_minus.9477.9477.3    | 3 | 3.62 | 1.800E+04 |                                     | (RINMVEE(R)R)M V M E G K D / Q P S R I K)                | m.Oxidized methionine | 112.28   | 512.9085 | 1536.711 | -0.0022  | -1.0  | 4.68    | 99900.1  | 5.04  | HUMAN  | B4D28                                | Coatomer protein complex, subunit beta 2 (Beta prime), isoform CRA_b                                  |
| 25093 | dirMS_D41712_NAR_120mM_plus.10081.10081.4  | 4 | 3.62 | 0.982E+05 |                                     | (KINFLAD(R)R)P L / A D G S S H I T V I K I Q)            | m.Oxidized methionine | 97.6     | 429.9899 | 1716.903 | -0.001   | -0.6  | 6.92    | 33421.3  | 6.34  | HUMAN  | P19324                               | Desmoplakin                                                                                           |
| 25094 | dirMS_D41712_NAR_20mM_plus.19229.19229.2   | 2 | 3.62 | 0.095E+05 |                                     | (KIDYDQA(R)R)E G G I G P L V A V G D V K)                | m.Oxidized methionine | 204.32   | 637.2791 | 1271.755 | -0.0119  | -2.4  | 4.41    | 29532.8  | 9.49  | HUMAN  | CS180                                | Regulator of chromosome condensation (Fragment)                                                       |
| 25095 | dirMS_D41712_NAR_20mM_plus.5851.5851.2     | 2 | 3.62 | 0.742E+04 | M283m                               | (RINDYD(R)R)D I D D S P S S R I K)                       | m.Oxidized methionine | 96.7     | 625.9052 | 198.388  | 15.9947  | 0.2   | 3.93    | 51260.6  | 5.39  | HUMAN  | P61798                               | Heterogeneous nuclear ribonucleoprotein K                                                             |
| 25096 | dirMS_D41712_NAR_20mM_plus.7007.7007.2     | 2 | 3.62 | 1.45E+05  | M35m                                | (RIVFEIR(R)R)E F / M D D T S R I K)                      | m.Oxidized methionine | 115.45   | 558.2383 | 1099.473 | 15.9969  | 1.8   | 4.03    | 7898     | 4.05  | HUMAN  | P62857                               | 40S ribosomal protein S28                                                                             |
| 25097 | dirMS_D41712_NAR_20mM_plus.8226.8226.3     | 3 | 3.62 | 0.230E+05 | M30m                                | (KIMGGM(R)K)M G G M E G / P P / G / G / G E N M G R I F) | m.Oxidized methionine | 106.28   | 593.558  | 1714.68  | 63.9379  | -0.4  | 4.53    | 77999.7  | 9.19  | HUMAN  | PS2272                               | Heterogeneous nuclear ribonucleoprotein M                                                             |
| 25098 | dirMS_D41712_NAR_40mM_plus2.11384.11384.3  | 3 | 3.62 | 0.409E+05 | M30m                                | (RIFSSSS(R)R)F S S / S S / G G S S V R I K)              | m.Oxidized methionine | 49.08    | 618.2686 | 1235.529 | 0.0012   | 1     | 8.75    | 62291.5  | 5.13  | HUMAN  | P35327                               | Keratin, type I cytoskeletal 9                                                                        |
| 25099 | dirMS_D41712_NAR_40mM_plus2.5654.5654.2    | 2 | 3.62 | 1.112E+05 |                                     | (RINQGGV(R)R)Q G / G Y G S S S S V S Y G S R I R)        | m.Oxidized methionine | 90.62    | 847.8525 | 1694.7   | -0.0024  | -1.4  | 8.59    | 33268.7  | 9.13  | HUMAN  | FBVQ1                                | Heterogeneous nuclear ribonucleoprotein A1                                                            |
| 25100 | dirMS_D41712_NAR_40mM_plus2.6361.6361.2    | 2 | 3.62 | 0.157E+05 |                                     | (KISLEINS(K)S)L E / S / V N S R I K)                     | m.Oxidized methionine | 96.65    | 453.2358 | 905.469  | -0.0044  | -4.8  | 5.72    | 12826.8  | 9.82  | HUMAN  | ESR89                                | 60S ribosomal protein L30 (Fragment)                                                                  |
| 25102 | dirMS_D41712_NAR_50mM_plus2.11283.11283.3  | 3 | 3.62 | 1.434E+05 |                                     | (KISAEVK(R)K)S A / E K V / I A / V T L T R I K)          | m.Oxidized methionine | 132.12   | 477.6113 | 1430.821 | -0.002   | -1.4  | 6.14    | 26661.1  | 7.81  | HUMAN  | HM0169                               | Proteasome subunit alpha type 1 (Fragment)                                                            |
| 25103 | dirMS_D41712_NAR_50mM_plus2.15286.15286.3  | 3 | 3.62 | 1.205E+05 |                                     | (RIDFGEA(R)R)E V G E K T Q P D I F T F I A A K I F)      | m.Oxidized methionine | 147.35   | 638.0141 | 1906.043 | -0.0155  | -8.1  | 8.59    | 32905.8  | 5.88  | HUMAN  | C9J19                                | Cathepsin D light chain (Fragment)                                                                    |
| 25104 | dirMS_D41712_NAR_50mM_plus2.16244.16244.3  | 3 | 3.62 | 1.506E+04 |                                     | (RIFKAHP(R)R)K A / H / P D Q L L V L F I A G I K)        | m.Oxidized methionine | 154.05   | 561.9883 | 1683.958 | -0.0077  | -4.6  | 8.6     | 24188.4  | 6.44  | HUMAN  | C9YQ4                                | Ubiquitin-3 (Fragment)                                                                                |
| 25105 | dirMS_D41712_NAR_50mM_plus2.8342.8342.3    | 3 | 3.62 | 0.946E+04 |                                     | (KIDATAG(R)K)A T J A G D T H L G E G D / D R I L K)      | m.Oxidized methionine | 110.23   | 559.2487 | 1675.731 | 0.0009   | 0.5   | 4.22    | 85802.6  | 6.09  | HUMAN  | B4DX3                                | Heat shock 70 kDa protein 1-like                                                                      |
| 25106 | dirMS_D41712_NAR_60mM_plus.17447.17447.3   | 3 | 3.62 | 1.846E+05 |                                     | (RDKLNN(R)K)K L M V N L V I / D F I A K)                 | m.Oxidized methionine | 148.4    | 440.2499 | 1318.737 | -0.0014  | -1    | 5.96    | 13798.9  | 10.17 | HUMAN  | P62851                               | 40S ribosomal protein S25                                                                             |
| 25107 | dirMS_D41712_NAR_60mM_plus.5580.5580.3     | 3 | 3.62 | 1.745E+05 |                                     | (RIVYDGA(R)R)E G G I G P L V A V G D V K)                | m.Oxidized methionine | 168.15   | 651.2424 | 1298.61  | -0.0066  | -7.1  | 8.52    | 80266.2  | 6.91  | HUMAN  | Q9H04                                | Zinc finger protein-408                                                                               |
| 25108 | dirMS_D41712_NAR_60mM_plus.9790.9790.3     | 3 | 3.62 | 1.709E+05 |                                     | (RITDKAR(R)R)P T P K E A E V G L E K V A K A)            | m.Oxidized methionine | 109.58   | 494.5808 | 1481.73  | -0.0026  | -1.8  | 5.81    | 57204.9  | 6.01  | HUMAN  | G5W6F6                               | T-complex protein 1 subunit beta                                                                      |
| 25109 | dirMS_D41712_NAR_120mM_minus.18260.18260.4 | 4 | 3.61 | 1.315E+05 |                                     | (KILGSGS(K)K)G S / G V S S S V L H G M V F K I E)        | m.Oxidized methionine | 92.42    | 457.5223 | 1947.073 | -0.0058  | -3    | 6       | 38214.7  | 5.25  | HUMAN  | Q9Y230                               | T-complex protein 1 subunit theta                                                                     |
| 25110 | dirMS_D41712_NAR_120mM_minus.7066.7066.2   | 2 | 3.61 | 0.418E+05 |                                     | (KIMNAF(K)R)H N / A / F / C / Y / K I K)                 | C.Carbonmethylation   | 154.02   | 505.7282 | 1104.451 | -0.0021  | -2.1  | 8.6     | 10856.1  | 8.55  | HUMAN  | HOYLA                                | Sorbitol dehydrogenase                                                                                |
| 25111 | dirMS_D41712_NAR_20mM_minus.10370.10370.2  | 2 | 3.61 | 1.134E+04 |                                     | (RIDPMLA(R)R)P T A A V S G D V K I Q)                    | m.Oxidized methionine | 152.16   | 615.3225 | 1231.629 | -0.0047  | -7    | 4.92    | 80266.2  | 6.91  | HUMAN  | C9H04                                | Xenopus repair complex-associated defective repair in Chinese hamster cells 6 (Ku autoantigen, 70kDa) |
| 25112 | dirMS_D41712_NAR_20mM_minus.14530.14530.2  | 2 | 3.61 | 1.732E+04 |                                     | (KIEUKDG(K)K)L I K / I V G S T V D I H K N K)            | m.Oxidized methionine | 199.67   | 784.9166 | 1568.828 | -0.0019  | -1.2  | 5.38    | 131273.2 | 8.93  | HUMAN  | HC75E4                               | 5'-3' exoribonuclease 1 (Fragment)                                                                    |
| 25113 | dirMS_D41712_NAR_30mM_minus2.16183.16183.2 | 2 | 3.61 | 1.114E+05 |                                     | (RIGJLGLD(R)R)L G L / D V A L E P P R K)                 | m.Oxidized methionine | 101.1    | 578.299  | 1155.6   | -0.0097  | -8.4  | 4.03    | 51326.8  | 5.49  | HUMAN  | Q9Y230                               | RuvB-2                                                                                                |
| 25114 | dirMS_D41712_NAR_30mM_minus2.16797.16797.2 | 2 | 3.61 | 0.192E+04 |                                     | (RIGFAFPF(R)K)A N / P P P R A A V R I K)                 | m.Oxidized methionine | 144.35   | 545.2937 | 1089.584 | -0.0039  | -3.5  | 9.75    | 613      |       |        |                                      |                                                                                                       |

|       |                                           |   |      |   |                 |                                                               |                           |        |          |          |          |       |          |          |       |        |                                                            |                                                                              |
|-------|-------------------------------------------|---|------|---|-----------------|---------------------------------------------------------------|---------------------------|--------|----------|----------|----------|-------|----------|----------|-------|--------|------------------------------------------------------------|------------------------------------------------------------------------------|
| 25175 | dirMS_041712_NAR_120mM_plus.15347.15347.4 | 4 | 3.59 | 2 | 4.85E+05        | (KLLVGGV) (K) L L V G / D E K L N P / E D I K H (K)           |                           | 133.67 | 451.2599 | 1810.032 | -0.143   | -7.9  | 4.79     | 121749.9 | 6.97  | HUMAN  | P53396                                                     | ATP-citrate synthase                                                         |
| 25176 | dirMS_041712_NAR_120mM_plus.6731.6731.3   | 3 | 3.59 | 1 | 2.82E+05        | (RRCMEM) (R) C R / E M D E / Q (V) (K)                        | C-carbamidomethylation    | 88.48  | 411.8549 | 1236.546 | -0.042   | -3.9  | 4.68     | 33450.2  | 4.73  | HUMAN  | J3K607                                                     | Topomoyxin alpha-3 chain                                                     |
| 25177 | dirMS_041712_NAR_120mM_plus.6770.6770.2   | 3 | 3.59 | 1 | 1.97E+05        | (KIFVSPK) (K) G G / G N / C P / G / G (K)                     |                           | 114.45 | 455.8889 | 1377.629 | -0.019   | -4.4  | 9.75     | 31486.1  | 9.03  | HUMAN  | P22626                                                     | Proteoglycan core protein 1                                                  |
| 25178 | dirMS_041712_NAR_20mM_plus.13554.13554.2  | 2 | 3.59 | 0 | 2.03E+05        | (RIGGEM) (R) G D / V E / P A / E / K (K)                      |                           | 166.5  | 571.3075 | 1141.61  | -0.002   | -1.9  | 4.14     | 18466.1  | 5.78  | HUMAN  | H385U3                                                     | Pyruvate kinase (Fragment)                                                   |
| 25179 | dirMS_041712_NAR_20mM_plus.19039.19039.3  | 3 | 3.59 | 0 | 6.18E+04        | (KIDTSLY) (K) D T S Y L / F P / D V P V V (K)                 |                           | 109.9  | 518.9378 | 1554.805 | -0.002   | -4.7  | 6.1      | 61363    | 8.73  | HUMAN  | Q10309                                                     | Propionyl-CoA carboxylase beta chain, mitochondrial                          |
| 25180 | dirMS_041712_NAR_20mM_plus.8530.8530.2    | 2 | 3.59 | 0 | 3.02E+05        | (KKNWGG) (K) W N / Q Q / Q E / F / V / R (A)                  |                           | 212.47 | 567.7865 | 1134.554 | -0.119   | -10.5 | 4.37     | 16600.2  | 10.31 | HUMAN  | P39019                                                     | 40S ribosomal protein S19                                                    |
| 25181 | dirMS_041712_NAR_30mM_plus.11704.11704.3  | 3 | 3.59 | 0 | 3.53E+05        | (RIGGGGG) (R) G G / G N / C P / G / G (K)                     |                           | 114.45 | 455.8889 | 1377.629 | -0.019   | -4.4  | 9.75     | 31486.1  | 9.03  | HUMAN  | P22626                                                     | Heterotrimeric nuclear ribonucleoproteins A2/B1                              |
| 25182 | dirMS_041712_NAR_30mM_plus.19385.19385.2  | 2 | 3.59 | 0 | 4.56E+04        | (RIFVFFGG) (R) F F / F D / V G S / N / K (Y)                  |                           | 115.13 | 530.7617 | 1060.51  | 0.063    | 5.9   | 5.84     | 35024.2  | 6.07  | HUMAN  | Q00577                                                     | Transcriptional activator protein Piv-alpha                                  |
| 25183 | dirMS_041712_NAR_30mM_plus.5298.5298.2    | 2 | 3.59 | 0 | 5.47E+05        | (KIVSFFEE) (K) V S / F E E / K (M)                            |                           | 85.57  | 413.203  | 825.399  | -0.002   | -0.2  | 4.55     | 31330.8  | 9.26  | HUMAN  | EP082                                                      | Malate dehydrogenase, mitochondrial                                          |
| 25184 | dirMS_041712_NAR_30mM_plus.9390.9390.2    | 2 | 3.59 | 0 | 4.66E+05        | (KATDADS) (K) A T D / A S / K (T)                             |                           | 103    | 426.7266 | 852.446  | -0.002   | -0.3  | 5.88     | 25381.9  | 10.49 | HUMAN  | EP0207                                                     | 40S ribosomal protein S2                                                     |
| 25185 | dirMS_041712_NAR_40mM_plus.10876.10876.3  | 3 | 3.59 | 1 | 1.50E+04        | (KIDVVIC) (R) V I V / C P / D S L E D A K A K (E)             | C-carbamidomethylation    | 130.32 | 553.9465 | 1659.826 | -0.009   | -0.5  | 4.23     | 18800.7  | 7.92  | HUMAN  | K7E100                                                     | Formin 6                                                                     |
| 25186 | dirMS_041712_NAR_40mM_plus.9085.9085.2    | 2 | 3.59 | 0 | 1.94E+05        | (KIKLQWV) (K) L Q W / F G W / W / L / Q (K)                   |                           | 115.2  | 417.239  | 891.64   | -0.004   | -0.3  | 8.75     | 12797.5  | 4.71  | HUMAN  | Q7104                                                      | Glucose-6-phosphate isomerase (Fragment)                                     |
| 25187 | dirMS_041712_NAR_40mM_plus.9824.9824.2    | 2 | 3.59 | 0 | 2.75E+05        | (KISCNLL) (K) S / C / N / L / L / K (K)                       |                           | 121.03 | 504.2542 | 1007.501 | 0.001    | -0.1  | 8.47     | 47510.4  | 7.04  | HUMAN  | P06733                                                     | Alpha-amylase                                                                |
| 25188 | dirMS_041712_NAR_50mM_plus.10504.10504.3  | 3 | 3.59 | 0 | 4.00E+04        | (RITSATVL) (R) T S A / Y L / A P N I N R (R)                  |                           | 122.55 | 478.5966 | 1433.775 | -0.005   | -0.4  | 8.41     | 36963.8  | 10.04 | HUMAN  | Q68188                                                     | Epithelial-stromal interaction protein 1                                     |
| 25189 | dirMS_041712_NAR_50mM_plus.12099.12099.3  | 3 | 3.59 | 1 | 3.83E+05        | (KIPGGGL) (K) P / G G / E L N P / G D / V / E G L R (K)       |                           | 134.28 | 536.9936 | 1906.366 | 0.001    | 0.1   | 4.25     | 17283.8  | 5.95  | HUMAN  | H3BN03                                                     | Cleavage and polyadenylation-specificity factor subunit 5 (Fragment)         |
| 25190 | dirMS_041712_NAR_50mM_plus.14231.14231.3  | 3 | 3.59 | 1 | 6.66E+05        | (RIMSME) (R) M S M / S K E V / D Q / M L N V Q N R (K)        |                           | 142.87 | 641.9839 | 1927.897 | 0.0      | 0     | 4.68     | 40059.4  | 4.83  | HUMAN  | ETW191                                                     | Tubulin beta chain                                                           |
| 25191 | dirMS_041712_NAR_50mM_plus.16097.16097.3  | 3 | 3.59 | 0 | 4.14E+04        | (KIVSGSK) (K) V S / G / S / K / C / S / P / L / D / V / Q (K) | C-carbamidomethylation    | 118.38 | 568.5652 | 1704.853 | -0.014   | -0.8  | 4.79     | 16650    | 6.87  | HUMAN  | D6R986                                                     | 40S ribosomal protein S3a                                                    |
| 25192 | dirMS_041712_NAR_50mM_plus.21822.21822.3  | 3 | 3.59 | 1 | 2.08E+05        | (RJKVPEIR) (R) K V P E / L / W / E / M / F / L P A T (K)      |                           | 185.52 | 545.2925 | 1633.869 | -0.063   | -3.8  | 6.14     | 95051    | 6.63  | HUMAN  | B3X0V5                                                     | AP-1 complex subunit gamma-1                                                 |
| 25193 | dirMS_041712_NAR_50mM_plus.2074.8074.3    | 3 | 3.59 | 1 | 2.94E+04        | (KELGQAG) (K) E L / G / A / G / S / P / E / L / K (K)         |                           | 109.3  | 514.9321 | 1542.776 | 0.059    | 3.8   | 4.41     | 63374.2  | 6.64  | HUMAN  | P06744                                                     | Glucose-6-phosphate isomerase                                                |
| 25194 | dirMS_041712_NAR_50mM_plus.2536.9536.3    | 3 | 3.59 | 2 | 1.71E+05 M1m    | (LIMIDSTF) (H) I M / D / S T V P R / G E K S K (D)            |                           | 117.6  | 521.6042 | 1546.826 | 15.973   | -14.5 | 8.35     | 26772.6  | 8.92  | HUMAN  | Q4D134                                                     | Isomform 6 of Tyrosine-protein phosphatase non-receptor type 20              |
| 25195 | dirMS_041712_NAR_60mM_plus.19087.19087.3  | 3 | 3.59 | 0 | 1.51E+05        | (RHNHPLL) (R) N H P P / L / L / W / D T F F R (D)             |                           | 156.87 | 605.6001 | 1514.776 | 0.073    | 4.8   | 6.74     | 130372.9 | 6.37  | HUMAN  | P11498                                                     | Pyruvate carboxylase, mitochondrial                                          |
| 25196 | dirMS_041712_NAR_60mM_plus.6160.6160.3    | 3 | 3.59 | 0 | 4.30E+05        | (RIGQSSM) (R) I / G / S S / M / L / V / E Q G A (R)           |                           | 91.62  | 445.2196 | 1333.653 | -0.086   | -6.5  | 6        | 133450   | 7.41  | HUMAN  | I33751                                                     | Laminin subunit beta-3                                                       |
| 25197 | dirMS_041712_NAR_60mM_plus.7771.7771.2    | 2 | 3.59 | 1 | 2.95E+05        | (RKLSTCN) (R) L S T / C / Y / G / A P K (G)                   |                           | 98.9   | 647.8247 | 1294.682 | -0.043   | -3.3  | 9.7      | 61018.6  | 9.44  | HUMAN  | B4D1W8                                                     | Probable ATP-dependent RNA helicase DDX5                                     |
| 25198 | dirMS_041712_NAR_60mM_plus.9708.9708.3    | 3 | 3.59 | 1 | 7.62E+04        | (KKEALST) (K) K E A / L S T / S / T / A / S / L / K (K)       |                           | 106.7  | 425.898  | 1275.69  | -0.019   | -0.5  | 6.24     | 61336.9  | 5.88  | HUMAN  | D0K4Q3                                                     | Prelam A/C                                                                   |
| 25199 | dirMS_041712_NAR_20mM_minus.13194.13194.2 | 2 | 3.59 | 0 | 1.40E+05        | (KIVGVMK) (K) V G / M / C / W / V / P / G / G L A / K V (K)   |                           | 138.15 | 512.938  | 1824.985 | -0.051   | -2.8  | 5.8      | 49012.3  | 4.9   | HUMAN  | ABM1U6                                                     | Tubulin alpha-4 chain                                                        |
| 25200 | dirMS_041712_NAR_20mM_minus.14552.14552.3 | 3 | 3.58 | 0 | 1.76E+04        | (KLAVEALK) (K) A V E A L S / L / D / G / D L A G V (R)        |                           | 199.98 | 529.6163 | 1586.838 | -0.041   | -2.6  | 4.03     | 24286.7  | 4.89  | HUMAN  | G3V4N7                                                     | Creatine kinase B-type (Fragment)                                            |
| 25201 | dirMS_041712_NAR_20mM_minus.7581.7581.3   | 3 | 3.58 | 0 | 1.03E+06 M23m   | (KIEVDEQ) (K) E V D E / Q M S L / W N V Q N K (K)             | m-oxidized methionine     | 124.38 | 488.2327 | 1446.689 | -0.594   | -0.5  | 4.14     | 40069.4  | 4.83  | HUMAN  | ETW191                                                     | Tubulin beta chain                                                           |
| 25202 | dirMS_041712_NAR_20mM_minus.8707.8707.2   | 2 | 3.58 | 0 | 1.91E+04 M14m   | (KILTDNA) (K) T / D / H A Y M E K (K)                         |                           | 136.55 | 607.2934 | 1197.582 | 15.975   | -2.1  | 4.37     | 30947.9  | 6.47  | HUMAN  | H3B3U4                                                     | Pyruvate kinase                                                              |
| 25203 | dirMS_041712_NAR_20mM_minus.11818.11818.2 | 2 | 3.58 | 0 | 8.06E+05        | (KIVGVMK) (K) V G / M / C / W / V / P / G / G L A / K V (K)   |                           | 117.6  | 521.6042 | 1546.826 | 15.973   | -14.5 | 8.35     | 26772.6  | 8.92  | HUMAN  | Q4D134                                                     | Isomform 6 of Tyrosine-protein phosphatase non-receptor type 20              |
| 25204 | dirMS_041712_NAR_30mM_plus.14714.14714.2  | 2 | 3.58 | 0 | 2.04E+04        | (KISL2) (K) S L 2 / A / M / A / R (K)                         |                           | 133.21 | 494.2641 | 987.256  | -0.049   | -4.9  | 4.37     | 26616.9  | 5.68  | HUMAN  | EP9304                                                     | Epipkain                                                                     |
| 25205 | dirMS_041712_NAR_30mM_minus.8921.8921.2   | 2 | 3.58 | 0 | 2.07E+05        | (KQAEIQK) (K) Q A E / I / Q / A / E / I / Q (K)               | m-oxidized methionine     | 102.72 | 537.2824 | 1073.559 | -0.001   | -1.4  | 4.53     | 15962.5  | 9.61  | HUMAN  | B4D330                                                     | Tubulin-specific chaperone A                                                 |
| 25206 | dirMS_041712_NAR_40mM_plus.13366.13366.3  | 3 | 3.58 | 1 | 1.01E+04 M148m  | (RILDLAG) (R) I L D A / L E R V / D T / D Y L M K (K)         |                           | 161.87 | 547.2822 | 1623.841 | 15.991   | -2.4  | 4.43     | 37482.1  | 5.36  | HUMAN  | EP9630                                                     | Actin, gamma-enteric smooth muscle                                           |
| 25207 | dirMS_041712_NAR_40mM_plus.12883.12883.3  | 3 | 3.58 | 0 | 1.55E+05        | (KIKASLQ) (K) I K A S L / Q / S / L / S / L / K (K)           |                           | 115.2  | 417.239  | 891.64   | -0.004   | -0.3  | 8.75     | 12797.5  | 4.71  | HUMAN  | Q7104                                                      | Glucose-6-phosphate isomerase (Fragment)                                     |
| 25208 | dirMS_041712_NAR_50mM_plus.12929.12929.3  | 3 | 3.58 | 1 | 5.01E+05        | (KIVLAGDK) (K) V I A G D K N F V T / E L R (R)                |                           | 142.53 | 559.3044 | 1675.901 | -0.027   | -1.6  | 4.68     | 80254.2  | 5.05  | HUMAN  | D6P944                                                     | Alpha-actinin 4 short isoform                                                |
| 25209 | dirMS_041712_NAR_50mM_plus.15027.15027.3  | 3 | 3.58 | 0 | 8.32E+04 K348k  | (RISKPGA) (R) S K P G A V S T P / V V (K)                     | k1-ubiquitin-k            | 153.6  | 413.2554 | 1183.705 | 114.041  | 7.1   | 107977.8 | 6.21     | HUMAN | G3V119 | Tight junction protein 1 (Zona occludens 1), isoform CRA_A |                                                                              |
| 25210 | dirMS_041712_NAR_50mM_minus.9202.9202.3   | 3 | 3.58 | 2 | 4.90E+04 S470s  | (KIEVPEV) (K) E V / E / I / E / K / L / K (K)                 | m-N-acetylglucosamine (S) | 119.6  | 506.6094 | 1314.726 | 203.0873 | 5.2   | 6.23     | 74986.2  | 6.56  | HUMAN  | I3380                                                      | Elongation-derived growth factor-related protein 2                           |
| 25211 | dirMS_041712_NAR_60mM_plus.7277.7277.2    | 2 | 3.58 | 0 | 1.12E+05        | (KISTTGH) (K) I S T T / G H / V / V / K (K)                   |                           | 99.65  | 560.8028 | 1210.6   | -0.014   | -1.2  | 8.4      | 12137.8  | 9.3   | HUMAN  | AP9W80                                                     | Hepatoma factor 1-alpha 1 (Fragment)                                         |
| 25212 | dirMS_041712_NAR_120mM_plus.18725.18725.4 | 4 | 3.58 | 1 | 2.48E+05 Q1272k | (KIFSGSK) (K) I F S G S / K / L / T / S / M E (K)             | k1-ubiquitin-k            | 151.23 | 421.9819 | 1078.844 | 114.0662 | 13.8  | 8.59     | 35429.3  | 8.87  | HUMAN  | EP9115                                                     | Undisclosed protein C22orf55                                                 |
| 25213 | dirMS_041712_NAR_120mM_plus.6183.6183.3   | 3 | 3.58 | 0 | 2.12E+05 T200T  | (KJADVEK) (K) A D V L E / G / A / E / R / L (K)               |                           | 85.42  | 421.8474 | 1060.527 | 203.0871 | 1.9   | 4.14     | 89133    | 5.76  | HUMAN  | Q32M00                                                     | Myosin light chain kinase 3                                                  |
| 25214 | dirMS_041712_NAR_120mM_plus.7028.7028.3   | 3 | 3.58 | 1 | 9.66E+04        | (KISNODG) (K) S N O D G / G N G V E / I A R (K)               |                           | 89.93  | 506.2999 | 1516.735 | 0.001    | 0.1   | 4.68     | 10305.6  | 6.04  | HUMAN  | HT7C30                                                     | cAMP-dependent protein kinase type II-alpha regulatory subunit (Fragment)    |
| 25215 | dirMS_041712_NAR_20mM_plus.13270.13270.2  | 2 | 3.58 | 0 | 5.69E+04        | (RILGADT) (R) I / G A D T S / V D T E / E T G A R (K)         |                           | 163.27 | 788.3928 | 1575.786 | -0.007   | -4.9  | 3.91     | 15338.4  | 5.51  | HUMAN  | K7EFL1                                                     | ATP synthase subunit alpha, mitochondrial (Fragment)                         |
| 25216 | dirMS_041712_NAR_20mM_plus.16121.16121.2  | 2 | 3.58 | 0 | 3.26E+05        | (KIVGVMK) (K) V G / M / C / W / V / P / G / G L A / K V (K)   |                           | 117.6  | 521.6042 | 1546.826 | 15.973   | -14.5 | 8.35     | 26772.6  | 8.92  | HUMAN  | Q4D134                                                     | Isomform 6 of Tyrosine-protein phosphatase non-receptor type 20              |
| 25217 | dirMS_041712_NAR_20mM_plus.18369.18369.3  | 3 | 3.58 | 1 | 1.87E+04        | (RILEQDP) (R) E / P D P G A V / A / A / R / I (R)             |                           | 119.05 | 581.2985 | 1591.88  | -0.007   | -0.4  | 4.37     | 59388.4  | 7.16  | HUMAN  | Q3L3A3                                                     | Bifunctional ATP-dependent dihydroxyacetone kinase/FAD-AMP lyase (cyclizing) |
| 25218 | dirMS_041712_NAR_30mM_plus.10910.10910.2  | 2 | 3.58 | 1 | 1.02E+05        | (KIVVVLGG) (K) V V L G G / D K / D / K (K)                    |                           | 110.63 | 488.7894 | 972.572  | -0.002   | -0.9  | 5.92     | 104112.2 | 9.8   | HUMAN  | QUN0A0                                                     | A disintegrin and metalloproteinase with thrombospondin motifs 5             |
| 25219 | dirMS_041712_NAR_30mM_plus.15351.15351.2  | 2 | 3.58 | 0 | 5.55E+05        | (KIVGLQV) (K) V / G / L / Q / V / V / V / A / K (A)           |                           | 124.68 | 456.9794 | 912.588  | -0.020   | -0.2  | 8.73     | 61224.7  | 5.7   | HUMAN  | P18089                                                     | 60 kDa heat shock protein, mitochondrial                                     |
| 25220 | dirMS_041712_NAR_30mM_plus.4745.4745.2    | 2 | 3.58 | 0 | 3.04E+05 M20s   | (RIMSDYD) (R) I M S D Y / D / V / C / R (K)                   | C-carbamidomethylation    | 75.88  | 402.1579 | 859.387  | -0.019   | -1.4  | 4.21     | 13246.4  | 9.21  | HUMAN  | Q20117                                                     | Nicotin receptor coactivator 5 (Fragment)                                    |
| 25221 | dirMS_041712_NAR_30mM_plus.6683.6683.2    | 2 | 3.58 | 0 | 1.41E+05 M514m  | (KIEEMEN) (K) E E M E N / M / Q / K (E)                       | m-oxidized methionine     | 89.223 | 535.7068 | 1038.423 | 31.9669  | -8.8  | 4.25     | 67211.3  | 5.54  | HUMAN  | P32456                                                     | Interferon-induced guanylate-binding protein 2                               |
| 25222 | dirMS_041712_NAR_40mM_plus.9701.9701.2    | 2 | 3.58 | 0 | 1.34E+05 M14m   | (RINTEFM) (R) N T E F M / S V S (K)                           |                           | 120.45 | 421.7119 | 826.413  | -0.002   | -1.0  | 4.7      | 59388.4  | 7.16  | HUMAN  | Q3L3A3                                                     | Bifunctional ATP-dependent dihydroxyacetone kinase/FAD-AMP lyase (cyclizing) |

|       |                                            |   |      |           |       |                                                  |                                 |        |          |          |          |       |      |          |       |       |        |                                                                            |
|-------|--------------------------------------------|---|------|-----------|-------|--------------------------------------------------|---------------------------------|--------|----------|----------|----------|-------|------|----------|-------|-------|--------|----------------------------------------------------------------------------|
| 25284 | dirMS_041712_NAR_60mM_minus.14369.14369.3  | 3 | 3.56 | 1.776E+04 | M73m  | (KH)HMTG(K)H GTR V R T V V(K)A                   | m.DnaE2 methionine              | 140.25 | 517.2624 | 1533.763 | 16.0096  | 9.4   | 8.51 | 10593.8  | 9.22  | HUMAN | ESR126 | Epithelial-splicing regulatory protein 1 (Fragment)                        |
| 25285 | dirMS_041712_NAR_60mM_minus.15352.15352.3  | 3 | 3.56 | 0.137E+05 |       | (R)QHPRE(R)Q/H F/H F/E L V T G V(K)E             | m.DnaE2 methionine              | 145.13 | 470.9285 | 1410.774 | -0.003   | -2.1  | 6.75 | 27836    | 8.69  | HUMAN | Q9H853 | Purative tubulin-like protein alpha-4B                                     |
| 25286 | dirMS_041712_NAR_60mM_minus.17865.17865.4  | 3 | 3.56 | 1.108E+05 |       | (K)GSGVQ(R)K R V Q V D V L Q V L(K)M             | C.Carbonic dehydratase II       | 122.05 | 609.9795 | 1811.932 | 0.0154   | 12.5  | 5.66 | 162189.2 | 4.9   | HUMAN | Q8R9W5 | 4C7 cytochrome b5H4                                                        |
| 25287 | dirMS_041712_NAR_120mM_plus.12865.12865.4  | 4 | 3.56 | 2.197E+04 | S383s | (K)MREK(K)S M L E K F L V L N(A)R(T)             | n.N-acetylglucosaminase (S)     | 120.03 | 410.4375 | 1435.800 | 203.062  | 4.99  | 9.99 | 23608.3  | 9.06  | HUMAN | U9E9A9 | Neuronal navigator 3                                                       |
| 25288 | dirMS_041712_NAR_120mM_plus.5545.5545.2    | 2 | 3.56 | 0.844E+05 | T28r1 | (R)HGGAS(R)I Q D S I N M G V(G)K(I)              | n.N-acetylglucosaminase (T)     | 82.2   | 643.2993 | 1082.511 | 203.08   | 0.05  | 5.5  | 37461.8  | 9.56  | HUMAN | R8D055 | Transient receptor potential cation channel subfamily M member 8           |
| 25289 | dirMS_041712_NAR_120mM_plus.5701.5701.3    | 3 | 3.56 | 0.138E+04 |       | (R)HGGAS(R)I Q D S S A S S E D I W(R)N           | m.DnaE2 methionine              | 81.93  | 445.2267 | 1333.675 | -0.0091  | -6.8  | 4.37 | 23478.5  | 8.69  | HUMAN | B0Q0Y5 | EF-hand receptor binding domain 6                                          |
| 25290 | dirMS_041712_NAR_120mM_plus.6860.6860.3    | 3 | 3.56 | 0.461E+04 |       | (R)MTCSC(R)P V M C S F A G I E R(K)              | m.DnaE2 methionine              | 4.0    | 256.6299 | 1228.535 | 0.0154   | 12.5  | 5.66 | 162189.2 | 4.9   | HUMAN | Q8R9W5 | Collagen alpha-1(XII) chain                                                |
| 25291 | dirMS_041712_NAR_120mM_plus.6986.6986.6    | 3 | 3.56 | 0.724E+03 | N108m | (K)GIVGYS(K)EY G F A V S Y T V(K)K               | n.N-acetylglucosaminase (N)     | 89.1   | 462.218  | 1181.563 | 203.0769 | -1.8  | 8.5  | 14673.3  | 7.99  | HUMAN | E7E778 | Nucleoskin TIR4 (Fragment)                                                 |
| 25292 | dirMS_041712_NAR_20mM_plus.11260.11260.2   | 2 | 3.56 | 0.112E+04 |       | (R)TSGSVY(R)T S I G V I Y T V(K)K                | m.DnaE2 methionine              | 149.97 | 534.8004 | 1068.594 | 0.0      | 0     | 8.26 | 13286.2  | 9.99  | HUMAN | HD01A2 | Signal recognition particle 14 kDa protein                                 |
| 25293 | dirMS_041712_NAR_20mM_plus.13354.13354.2   | 2 | 3.56 | 0.846E+04 |       | (K)FVGGDS(K)F V F G Q L S P D P F P E(K)K        | m.DnaE2 methionine              | 166.3  | 744.8718 | 1488.758 | -0.0191  | -12.8 | 4.14 | 33782.7  | 8.78  | HUMAN | B4D7C3 | Heterogeneous nuclear ribonucleoprotein D0                                 |
| 25294 | dirMS_041712_NAR_20mM_plus.14182.14182.2   | 2 | 3.56 | 0.854E+04 |       | (K)FVGGDS(K)F V F G Q L S P D P F V V S R(E)K    | m.DnaE2 methionine              | 170.25 | 743.3789 | 1485.754 | -0.0038  | -2.6  | 3.93 | 92752.5  | 4.76  | HUMAN | P14625 | Endoplasmic reticulum chaperone protein 78 kDa                             |
| 25295 | dirMS_041712_NAR_20mM_plus.14699.14699.2   | 2 | 3.56 | 0.658E+04 |       | (R)GTFATP(R)S F V T V F V(K)K                    | m.DnaE2 methionine              | 172.87 | 616.019  | 977.567  | -0.0047  | -1.7  | 6.1  | 16600.3  | 9.43  | HUMAN | R0V0V0 | Heterocyst-CoA dehydrogenase, mitochondrial (Fragment)                     |
| 25296 | dirMS_041712_NAR_30mM_plus.6497.6497.2     | 2 | 3.56 | 0.146E+05 |       | (R)IGASGIA(R)G A G S A S A G A S A S P(K)E       | m.DnaE2 methionine              | 108.42 | 537.277  | 1075.559 | -0.0118  | -11   | 8.75 | 334221.3 | 6.44  | HUMAN | P15924 | Desmoplakin                                                                |
| 25297 | dirMS_041712_NAR_30mM_plus.15589.15589.2   | 2 | 3.56 | 0.331E+05 |       | (R)YNYFTQ(R)Y N I F F T C P(K)K                  | C.Carbonic dehydratase I        | 133.95 | 567.2595 | 1133.508 | 0.0033   | 2.9   | 8.99 | 46550.7  | 7.81  | HUMAN | B72CJ9 | Chaperonin containing TCP1, subunit 7 (Eta), isoform CRA_a                 |
| 25298 | dirMS_041712_NAR_30mM_plus.15706.15706.2   | 2 | 3.56 | 0.584E+05 |       | (R)YPNVY(R)Y P V N S V N I L(K)K                 | m.DnaE2 methionine              | 134.93 | 573.8278 | 1146.652 | -0.0034  | -3    | 8.59 | 44227.3  | 7.81  | HUMAN | E7C0E6 | T-complex protein 1 subunit alpha                                          |
| 25299 | dirMS_041712_NAR_30mM_plus.16958.16958.2   | 2 | 3.56 | 0.328E+05 |       | (K)GSGFLV(K)G C I S V S P D P V Q(K)K            | m.DnaE2 methionine              | 141.17 | 658.255  | 1311.604 | 0.0099   | 0.7   | 5.83 | 63088.6  | 5.11  | HUMAN | 81A1U8 | Prospodin                                                                  |
| 25300 | dirMS_041712_NAR_30mM_plus.21499.21499.2   | 2 | 3.56 | 0.141E+05 |       | (R)HTLAGP(R)I T L T A G P T R A N F(K)K          | m.DnaE2 methionine              | 165.95 | 679.9016 | 1358.804 | -0.0083  | -6.1  | 8.75 | 32621    | 8.75  | HUMAN | B4D1C0 | Poly(C)-binding protein 2                                                  |
| 25301 | dirMS_041712_NAR_40mM_plus.18396.18396.3   | 3 | 3.56 | 1.256E+04 |       | (R)EVTGQ(R)A E I V G G V P P L V L P V N Q(K)K   | m.DnaE2 methionine              | 174.58 | 646.716  | 1398.142 | -0.0088  | -4.5  | 8.5  | 18803.3  | 5.55  | HUMAN | E9P91  | Ester hydrolase CL1orf54 (Fragment)                                        |
| 25302 | dirMS_041712_NAR_40mM_plus.2171.7171.2     | 2 | 3.56 | 0.719E+04 | K127k | (K)YFHPRE(K)R I P H P M(K)E                      | l.kitiquin-e-k                  | 101    | 403.2039 | 691.356  | 114.0443 | 1.7   | 8.6  | 49990.8  | 5.14  | HUMAN | Q9Y366 | Intraflagellar transport protein 52 homolog                                |
| 25303 | dirMS_041712_NAR_40mM_plus.2923.2923.3     | 3 | 3.56 | 0.527E+04 | M376m | (K)MHPVR(K)M A P P V P L D S M R P A S L T(K)K   | m.DnaE2 methionine              | 122.05 | 609.9795 | 1811.932 | 0.0154   | 12.5  | 5.66 | 162189.2 | 4.9   | HUMAN | E9P914 | Bcl-2-associated transcription factor 1                                    |
| 25304 | dirMS_041712_NAR_50mM_plus.14215.14215.3   | 3 | 3.56 | 1.291E+05 |       | (K)ALDMD(K)A L D D V S T L L(K)K                 | m.DnaE2 methionine              | 143.27 | 412.2315 | 1234.671 | 0.0088   | 7.1   | 6    | 56186.7  | 5.47  | HUMAN | B4DUR8 | T-complex protein 1 subunit gamma                                          |
| 25305 | dirMS_041712_NAR_50mM_plus.17977.17977.3   | 3 | 3.56 | 0.249E+05 |       | (R)YTMFLP(R)T J M T V M F L G L N H V(K)K        | m.DnaE2 methionine              | 162.78 | 467.267  | 1399.788 | -0.0014  | -1    | 9.73 | 21721.5  | 5.37  | HUMAN | H78235 | Aspartate--tRNA ligase, cytoplasmic (Fragment)                             |
| 25306 | dirMS_041712_NAR_50mM_plus.21103.21103.3   | 3 | 3.56 | 1.321E+05 | M145m | (R)GVMAL(R)G V m L A V D A V I A E L K(K)K       | m.DnaE2 methionine              | 180.08 | 524.9717 | 1556.908 | 0.0093   | 11.5  | 6.07 | 25225.7  | 9.52  | HUMAN | E7E5H4 | 60 kDa heat shock protein, mitochondrial (Fragment)                        |
| 25307 | dirMS_041712_NAR_50mM_plus.21737.21737.3   | 3 | 3.56 | 1.120E+05 |       | (K)SGCLQA(K)K S L C A Q A L L L K L L(K)K        | C.Carbonic dehydratase I        | 115.33 | 468.2196 | 1679.253 | 0.0104   | 8.4   | 6.4  | 66923.1  | 6.88  | HUMAN | E9P325 | Methylcrotonyl-CoA carboxylase subunit alpha, mitochondrial (Fragment)     |
| 25308 | dirMS_041712_NAR_50mM_plus.10901.10901.3   | 3 | 3.56 | 1.371E+05 |       | (R)YKQK(R)K A V C V P P R G L(K)K                | m.DnaE2 methionine              | 110.05 | 442.925  | 1326.72  | 0.0031   | 2.1   | 8.1  | 50199.4  | 4.75  | HUMAN | ABN6Z2 | Tubulin beta-8 chain-like protein LOC203934                                |
| 25309 | dirMS_041712_NAR_60mM_plus.13332.13332.3   | 3 | 3.56 | 1.451E+06 |       | (R)YVDDML(R)V I D L M A H M A S K(E)K            | m.DnaE2 methionine              | 126.87 | 444.219  | 1330.649 | 0.0018   | 1.3   | 5.51 | 31718.5  | 7.17  | HUMAN | E7E7U4 | Glyceroldehyde-3-phosphate dehydrogenase                                   |
| 25310 | dirMS_041712_NAR_60mM_plus.17814.17814.3   | 3 | 3.56 | 1.863E+04 |       | (R)YIGNL(R)R F V G L N L T V V K(K)S             | m.DnaE2 methionine              | 150.35 | 482.3003 | 1444.889 | -0.0023  | -1.6  | 10   | 15791.7  | 9.22  | HUMAN | B4DSU6 | Heterogeneous nuclear ribonucleoproteins C1/C2                             |
| 25311 | dirMS_041712_NAR_60mM_plus.17941.17941.3   | 3 | 3.56 | 1.358E+05 |       | (K)CFEQA(K)K E F F Q D V A I V L S E F N(K)K     | C.Carbonic dehydratase I        | 150.55 | 577.288  | 1279.847 | 0.0029   | 1.7   | 4.68 | 61224.7  | 5.7   | HUMAN | P1F089 | 60 kDa heat shock protein, mitochondrial                                   |
| 25312 | dirMS_041712_NAR_120mM_minus.15571.15571.4 | 4 | 3.56 | 2.132E+04 |       | (R)YKQK(R)K A V C V P P R G L(K)K                | m.DnaE2 methionine              | 110.05 | 442.925  | 1326.72  | 0.0031   | 2.1   | 8.1  | 50199.4  | 4.75  | HUMAN | ABN6Z2 | Haloacid dehalogenase-like lysozyme domain-containing protein 2 (Fragment) |
| 25313 | dirMS_041712_NAR_120mM_minus.5470.5470.4   | 4 | 3.56 | 0.784E+04 |       | (R)YNYST(R)T Q A Y S V S T S C H(K)K             | C.Carbonic dehydratase I        | 183.88 | 414.1973 | 1240.563 | 0.0147   | 11.8  | 8.28 | 38077.6  | 8.99  | HUMAN | P06668 | Pro-kathexin                                                               |
| 25314 | dirMS_041712_NAR_120mM_minus.5773.5773.3   | 3 | 3.56 | 0.434E+04 | T96r1 | (R)YIQLD(R)Q E G P P S C S G V(R)K               | C.Carbonic dehydratase I Phox   | 85.02  | 424.5104 | 1391.952 | 0.0174   | 6.3   | 6    | 129266.2 | 5.86  | HUMAN | C3H9H8 | Scavenger receptor cysteine-rich type 1 protein M130                       |
| 25315 | dirMS_041712_NAR_120mM_minus.3041.13041.2  | 2 | 3.56 | 0.844E+05 | M73m  | (R)RIALVDL(R)A I V L V D L F P G T M D S V R(S)K | m.DnaE2 methionine              | 182.52 | 616.4184 | 1615.836 | 0.0035   | 2.8   | 8.03 | 27549.9  | 4.39  | HUMAN | E9P914 | Tubulin beta chain                                                         |
| 25316 | dirMS_041712_NAR_120mM_minus.10210.10210.3 | 3 | 3.56 | 0.453E+04 |       | (K)SGEGLD(K)E E I G D G L P R(K)K                | m.DnaE2 methionine              | 110.05 | 442.925  | 1326.72  | 0.0031   | 2.1   | 8.1  | 50199.4  | 4.75  | HUMAN | ABN6Z2 | Phosphatidylcholine transferase [NADP] cytoplasmic                         |
| 25317 | dirMS_041712_NAR_120mM_minus.19102.19102.2 | 2 | 3.56 | 1.102E+04 | M138m | (K)FQKFE(K)K F V E T L E L N K(K)K               | m.DnaE2 methionine              | 158.87 | 570.7897 | 1242.577 | 0.19593  | 0.3   | 8.59 | 57391.2  | 6.29  | HUMAN | Q43375 | D-3-phosphoglycerate dehydrogenase                                         |
| 25318 | dirMS_041712_NAR_50mM_minus.11947.11947.3  | 3 | 3.56 | 0.959E+03 | T165f | (R)YMNILC(R)M M L V C I P D P L V(K)K            | C.Carbonic dehydratase I tk-act | 136.35 | 545.9296 | 1432.717 | 203.0568 | -13.8 | 4.21 | 24489.1  | 10.1  | HUMAN | F8VVC7 | 11-cis retinol dehydrogenase                                               |
| 25319 | dirMS_041712_NAR_50mM_minus.12675.12675.3  | 3 | 3.56 | 1.347E+05 | T215f | (K)MMLFPL(K)M K M L F S G T M V N S G(K)K        | l.Phosphorylated tk-act         | 104.6  | 526.5884 | 1497.773 | 79.9777  | 7.2   | 10   | 115515.8 | 5.42  | HUMAN | Q93084 | Sarcoplasmic/endoplasmic reticulum calcium ATPase 3                        |
| 25320 | dirMS_041712_NAR_50mM_minus.17372.17372.3  | 3 | 3.56 | 0.201E+05 |       | (R)RILGGLD(R)L L L D Q A P L I A H N(K)K         | m.DnaE2 methionine              | 108.32 | 458.6218 | 1373.852 | -0.0007  | -0.5  | 6.74 | 16469.8  | 8     | HUMAN | K7EHW7 | Haloacid dehalogenase-like lysozyme domain-containing protein 2 (Fragment) |
| 25321 | dirMS_041712_NAR_50mM_minus.8328.8328.3    | 3 | 3.56 | 1.336E+05 | M172m | (R)KEMDQ(R)K E M Q Q M V S P D V I C(R)K         | m.DnaE2 methionine              | 116.27 | 590.5989 | 1371.797 | 31.9823  | 2.6   | 4.1  | 136983.7 | 6.28  | HUMAN | E2D9H8 | 1-phosphatidylinositol-4,5-bisphosphate phosphodiesterase beta-4           |
| 25322 | dirMS_041712_NAR_60mM_minus.15536.15536.3  | 3 | 3.56 | 1.592E+05 | M81m  | (K)EYKWF(K)K E V M K Q M A N Y S N L A S(K)K     | m.DnaE2 methionine              | 146.73 | 576.9619 | 1172.879 | 15.9923  | 1.5   | 8.69 | 14683.8  | 10.19 | HUMAN | P37308 | Signal recognition particle 14 kDa protein                                 |
| 25323 | dirMS_041712_NAR_60mM_minus.16000.16000.3  | 3 | 3.56 | 1.546E+03 |       | (K)YAEIG(K)K E I G A D L V L V L V S(K)K         | m.DnaE2 methionine              | 147.67 | 495.6258 | 1484.868 | -0.0054  | -3.7  | 6.11 | 36856.1  | 8.55  | HUMAN | HD01A4 | Sorbitol dehydrogenase                                                     |
| 25324 | dirMS_041712_NAR_60mM_minus.7480.7480.3    | 3 | 3.56 | 0.747E+04 |       | (R)YVTFQ(R)R E I F T Q F G V H D R D(K)K         | m.DnaE2 methionine              | 98.7   | 489.232  | 1465.671 | 0.0108   | 7.4   | 5.32 | 26760.7  | 5.95  | HUMAN | Q13085 | Acetyl-CoA carboxylase 1                                                   |
| 25325 | dirMS_041712_NAR_60mM_minus.7813.7813.3    | 3 | 3.56 | 0.216E+05 |       | (R)YKQK(R)K A V C V P P R G L(K)K                | m.DnaE2 methionine              | 110.05 | 442.925  | 1326.72  | 0.0031   | 2.1   | 8.1  | 50199.4  | 4.75  | HUMAN | ABN6Z2 | Nucleoside diphosphate kinase 2                                            |
| 25326 | dirMS_041712_NAR_60mM_minus.7918.7918.3    | 3 | 3.56 | 0.420E+04 |       | (K)H3RQ(R)R H P P Q Q L V H D D R(K)K            | m.DnaE2 methionine              | 103.87 | 462.9072 | 1386.687 | 0.0198   | 14.3  | 5.99 | 44456.4  | 6.1   | HUMAN | Q9V084 | Nitrogen permease regulator 2-like protein                                 |
| 25327 | dirMS_041712_NAR_60mM_minus.8988.8988.3    | 3 | 3.56 | 1.662E+05 | M223m | (R)M5M(K)R M S M K E V D D E Q M L N V Q N(K)K   | m.DnaE2 methionine              | 110.3  | 650.6138 | 1923.897 | 31.9836  | -3.2  | 4.68 | 40069.4  | 5.83  | HUMAN | E7EWR1 | Tubulin beta chain                                                         |
| 25328 | dirMS_041712_NAR_60mM_minus.9440.9440.3    | 3 | 3.56 | 1.492E+04 |       | (R)STTQEL(R)S T T F Q E L M D R V R(K)K          | m.DnaE2 methionine              | 112.2  | 517.9146 | 1551.732 | -0.0027  | -1.7  | 4.32 | 26616.1  | 5.88  | HUMAN | E9P910 | Epigkalin                                                                  |
| 25329 | dirMS_041712_NAR_120mM_plus.4473.4473.3    | 3 | 3.56 | 1.313E+05 |       | (R)IAQELD(R)K A S E F E D L A D P P R(K)K        | m.DnaE2 methionine              | 72.47  | 453.8721 | 1359.602 | -0.0055  | -0.4  | 4.08 | 1529.7   | 4.14  | HUMAN | P20862 | Parathyroid hormone-related protein                                        |
| 25330 | dirMS_041712_NAR_120mM_plus.8178.8178.2    | 2 | 3.56 | 0.659E+05 |       | (R)YAVVAV(R)Y A V N V L V R(K)K                  | m.DnaE2 methionine              | 96.78  | 429.2529 | 857.499  | -0.0007  | -0.8  | 8.75 | 17718.4  | 10.99 | HUMAN | PK2259 | 45S ribosomal protein S18                                                  |
| 2     |                                            |   |      |           |       |                                                  |                                 |        |          |          |          |       |      |          |       |       |        |                                                                            |

|       |                                            |   |      |   |          |                                                    |                               |        |          |          |          |       |         |            |             |                      |                                                                              |
|-------|--------------------------------------------|---|------|---|----------|----------------------------------------------------|-------------------------------|--------|----------|----------|----------|-------|---------|------------|-------------|----------------------|------------------------------------------------------------------------------|
| 25393 | dirMS_041712_NAR_120mM_plus.10535.10535.3  | 3 | 3.53 | 1 | 6.74E+05 | (R)FYKNEG (R)F YK VNK G/G T V S V E K(V)           |                               | 109    | 515.5841 | 1544.738 | -0.002   | -0.2  | 6.14    | 39066      | 6.61 HUMAN  | AP6VW9               | Selenium binding protein 1 (Fragment)                                        |
| 25394 | dirMS_041712_NAR_120mM_plus.11902.11902.3  | 3 | 3.53 | 1 | 1.87E+04 | (+m)SHKRT(+H)S H I K T F F V(K)                    | in.Oxidized methionine-oxi    | 116.32 | 425.869  | 1119.97  | 95.374   | 9.5   | 10      | 6292.4     | 12.41 HUMAN | Q96H5                | 60S ribosomal protein L39-like                                               |
| 25395 | dirMS_041712_NAR_120mM_plus.13679.13679.3  | 3 | 3.53 | 1 | 1.33E+05 | (R)YKMEK (R)K V G V V V T I E S V Q A C(K)         |                               | 124.25 | 545.28   | 1633.82  | 0.041    | -2.5  | 5.97    | 47329.4    | 3.76 HUMAN  | Q96H7                | Transitional endoplasmic reticulum ATPase                                    |
| 25396 | dirMS_041712_NAR_120mM_plus.9622.9622.3    | 3 | 3.53 | 1 | 7.40E+04 | (R)GTHKA (R)T F K E I C A V S R(K)                 | C.Carcinoma methionine        | 102.52 | 404.241  | 1120.625 | 0.029    | 2.4   | 8.41    | 25568.6    | 9.3 HUMAN   | BI41E1               | General transcription factor IIIF (Fragment)                                 |
| 25397 | dirMS_041712_NAR_20mM_plus.11374.11374.2   | 2 | 3.53 | 0 | 1.91E+05 | (R)YALDA (R)Y A L V D A T Y E T(K)                 |                               | 150.8  | 669.3157 | 1337.626 | -0.019   | -1.4  | 4.37    | 22956      | 8.8 HUMAN   | EPK25                | Coilin-1                                                                     |
| 25398 | dirMS_041712_NAR_20mM_plus.8706.8706.3     | 3 | 3.53 | 0 | 1.41E+05 | (K)GGKPF (K)G K P P P A M P O P W P T P A(T)       | in.Oxidized methionine        | 130.62 | 530.6038 | 1573.804 | 15.926   | -1.5  | 6       | 25441.5    | 9.92 HUMAN  | EP909                | 40S ribosomal protein S3                                                     |
| 25399 | dirMS_041712_NAR_30mM_plus.14461.14461.3   | 3 | 3.53 | 0 | 1.03E+04 | (K)NVGQK (K)N V G Q V V V T I E S V Q A C(K)       | C.Carcinoma methionine        | 127.72 | 545.28   | 1633.82  | 0.041    | -2.5  | 5.97    | 47329.4    | 3.76 HUMAN  | Q96H5                | Biotinidase                                                                  |
| 25400 | dirMS_041712_NAR_30mM_plus.15795.15795.2   | 2 | 3.53 | 0 | 5.03E+05 | (R)PHPTP (R)W P H P T A(R)                         |                               | 135.4  | 410.2436 | 819.484  | -0.036   | -4.4  | 9.75    | 38149      | 6.38 HUMAN  | Q8UJL8               | Tsukushi                                                                     |
| 25401 | dirMS_041712_NAR_30mM_plus.19871.19871.2   | 2 | 3.53 | 1 | 2.55E+05 | (K)LTLDQK (K)I T L D V L K M K(R)                  |                               | 157.35 | 559.3295 | 1117.64  | 0.019    | 10.7  | 8.75    | 98559.7    | 8.5 HUMAN   | Q99665               | Interleukin-12 receptor subunit beta-2                                       |
| 25402 | dirMS_041712_NAR_30mM_plus.20695.20695.2   | 2 | 3.53 | 0 | 1.01E+05 | (K)NLDEEK (K)N L I Q E I E I A D E I S R(V)        |                               | 162.52 | 708.8513 | 1416.697 | -0.012   | -0.8  | 4       | 15712.4    | 4.48 HUMAN  | EP902                | Prefoldin subunit 4                                                          |
| 25403 | dirMS_041712_NAR_30mM_plus.6558.6558.2     | 2 | 3.53 | 0 | 8.62E+04 | (K)SLMEK (K)S L M E E A D(K)                       |                               | 87.83  | 426.1971 | 851.381  | 0.002    | 6.4   | 4.14    | 26419.2    | 5.1 HUMAN   | HDY9K                | Splicing factor, proline- and glutamine-rich (Fragment)                      |
| 25404 | dirMS_041712_NAR_30mM_plus.7174.7174.2     | 2 | 3.53 | 0 | 2.13E+04 | (R)PQQDT (R)P V Q D V T V K(R)                     |                               | 91.48  | 450.248  | 911.47   | -0.041   | -4.5  | 9.18    | 2461.9     | 3.86 HUMAN  | Q96H7                | Nucleic acid transport protein Sec12A                                        |
| 25405 | dirMS_041712_NAR_40mM_plus.5071.5071.12    | 2 | 3.53 | 0 | 2.46E+05 | (K)GVYDQF (K)Y V D D P I R(N)                      | y.Phosphorylated 1            | 84.87  | 451.1811 | 821.379  | 79.9761  | 10.9  | 4.21    | 31653.2    | 8.92 HUMAN  | HT3386               | ADP-ribosyl pyrophosphatase, mitochondrial (Fragment)                        |
| 25406 | dirMS_041712_NAR_40mM_plus.6444.6444.2     | 2 | 3.53 | 0 | 1.39E+05 | (K)SLESINS (K)S L E I S I N S R(L)                 |                               | 96.85  | 451.2358 | 905.469  | -0.044   | -4.8  | 5.72    | 12826.8    | 8.92 HUMAN  | ES899                | 60S ribosomal protein L30 (Fragment)                                         |
| 25407 | dirMS_041712_NAR_50mM_plus.13597.13597.3   | 3 | 3.53 | 1 | 5.62E+05 | (K)SLYDEK (K)S L Y D E V A A Q G E V V R K(L)      |                               | 139.82 | 555.2908 | 1663.865 | -0.071   | -4.3  | 4.68    | 127185.3   | 7.06 HUMAN  | HT0714               | Bifunctional glutamate/proline-NR1Aase ligase                                |
| 25408 | dirMS_041712_NAR_50mM_plus.14086.14086.3   | 3 | 3.53 | 0 | 1.76E+05 | (R)MPLGL (R)M G L P L G D J M M A S I I E R(M)     | in.Oxidized methionine        | 142.73 | 541.2755 | 1621.877 | 15.992   | 2.6   | 5.3     | 77999.7    | 9.09 HUMAN  | PS2272               | Heterogeneous nuclear ribonucleoprotein M                                    |
| 25409 | dirMS_041712_NAR_50mM_plus.18880.18880.3   | 3 | 3.53 | 0 | 2.77E+05 | (K)MLPLSK (K)A L P L S S L T P L U M A K(E)        |                               | 165.82 | 604.1353 | 1653.997 | 0.003    | 10.2  | 24711.4 | 5.19 HUMAN | HT3C13      | PAK-26/34 (Fragment) |                                                                              |
| 25410 | dirMS_041712_NAR_50mM_plus.19952.19952.3   | 3 | 3.53 | 0 | 3.78E+05 | (K)KJNGK (K)G G L G H M M N I A L L U S D I T Q(K) |                               | 173.03 | 585.311  | 1753.927 | -0.081   | -4.6  | 6.74    | 26123.4    | 7.07 HUMAN  | EP929                | Thioredoxin-dependent peroxide reductase, mitochondrial                      |
| 25411 | dirMS_041712_NAR_50mM_plus.21643.21643.3   | 3 | 3.53 | 1 | 1.07E+04 | (R)YTLTP (R)Y T T L P T L T I K I(S)               | t.N-acetylglucosamine (T)     | 183.92 | 532.3178 | 1193.851 | 203.088  | 5.4   | 9.7     | 36889.9    | 9.05 HUMAN  | Q8NGJ2               | Olfactory receptor 52h1                                                      |
| 25412 | dirMS_041712_NAR_50mM_plus.2404.904.3      | 3 | 3.53 | 1 | 8.96E+04 | (R)YSTGM (R)Y S T G I K F A L K(L)                 | t.N-acetylglucosamine (T)     | 116.7  | 418.9081 | 1051.615 | 203.051  | 12.6  | 10      | 36151      | 6.2 HUMAN   | RC0225               | Nucleoside diphosphate-linked moiety X motif 17                              |
| 25413 | dirMS_041712_NAR_60mM_plus.14073.14073.3   | 3 | 3.53 | 0 | 1.87E+06 | (K)HPTFKK (K)H P T F V I E S F Q I A(K)            |                               | 130.05 | 486.2646 | 1456.78  | -0.002   | -0.1  | 6.75    | 52843.5    | 6.17 HUMAN  | BT230                | T-complex protein 1 subunit delta                                            |
| 25414 | dirMS_041712_NAR_60mM_plus.17205.17205.3   | 3 | 3.53 | 0 | 1.53E+04 | (K)JGHEVH (K)E G H V E V I V S E L V Q R(K)        |                               | 148.27 | 498.9326 | 1494.791 | -0.078   | -5.2  | 4.75    | 48586.6    | 9.32 HUMAN  | DBRC28               | Ankyrin-3                                                                    |
| 25415 | dirMS_041712_NAR_60mM_plus.18021.18021.3   | 3 | 3.53 | 1 | 8.54E+04 | (K)KEEDVQ (K)K E D V S Y I S G G L S E V K(E)      |                               | 151.25 | 638.979  | 1711.839 | 203.084  | 2.4   | 4.1     | 378557.2   | 4.96 HUMAN  | ET7E74               | Gamma subfamily B member 1                                                   |
| 25416 | dirMS_041712_NAR_120mM_minus.10514.10514.2 | 2 | 3.52 | 1 | 2.52E+05 | (K)MDEAK (K)M D E A K R E V A R(K)                 | t.Lysine-6                    | 111.28 | 495.2884 | 875.513  | 114.0564 | 12.6  | 9.99    | 19333.5    | 9.82 HUMAN  | HT3C08               | CSD assembly subunit 1 protein homolog (Fragment)                            |
| 25417 | dirMS_041712_NAR_20mM_minus.10301.10301.3  | 3 | 3.53 | 0 | 3.90E+05 | (K)EEDVQ (K)E D V S Y I S G G L S E V K(E)         |                               | 152.13 | 541.2755 | 1621.807 | -0.002   | -3.2  | 4.5     | 26161      | 5.68 HUMAN  | EP901                | Euplokin                                                                     |
| 25418 | dirMS_041712_NAR_20mM_minus.13161.13161.2  | 2 | 3.52 | 0 | 2.52E+05 | (R)NGPTEV (R)N G P T V E I V D L F T S K(G)        |                               | 183.18 | 703.8605 | 1406.716 | -0.025   | -1.8  | 4.37    | 21077      | 9.05 HUMAN  | KT6W90               | Alpha-enolase (Fragment)                                                     |
| 25419 | dirMS_041712_NAR_30mM_minus.19368.19368.2  | 2 | 3.52 | 0 | 5.23E+05 | (R)IFDQAR (R)I F D Q A F G L P I R(L)              |                               | 161.92 | 582.315  | 1163.621 | 0.002    | 1.7   | 5.84    | 20576.9    | 9.84 HUMAN  | BT8W04               | Heat shock protein beta-1                                                    |
| 25420 | dirMS_041712_NAR_40mM_minus.11617.11617.3  | 3 | 3.52 | 1 | 1.06E+05 | (R)HMLCCD (R)H M L C C Q G L A V L K I(P)          | C.Carcinoma methionine 1 Phos | 152.32 | 596.6671 | 1279.994 | 79.929   | 14.9  | 10      | 61308.1    | 9.01 HUMAN  | Q96Q09               | L-aminio acid oxidase                                                        |
| 25421 | dirMS_041712_NAR_40mM_minus.12113.12113.3  | 3 | 3.52 | 0 | 2.87E+05 | (R)HMLCCD (R)H M L C C Q G L A V L K I(P)          |                               | 154.23 | 605.462  | 1310.677 | -0.079   | -6.1  | 4.09    | 23395.5    | 8.33 HUMAN  | HT3C13               | Myosin II                                                                    |
| 25422 | dirMS_041712_NAR_50mM_minus.14425.14425.3  | 3 | 3.52 | 1 | 8.33E+04 | (R)SLDEEL (R)S L D E L E A L T V E V E V K(R)      |                               | 145.87 | 574.9724 | 1207.981 | 0.018    | 16.8  | 4.41    | 26768.7    | 4.97 HUMAN  | PT1270               | Nucleic acid transport protein TRP                                           |
| 25423 | dirMS_041712_NAR_60mM_minus.10896.10896.3  | 3 | 3.52 | 1 | 5.49E+05 | (R)EMDREI (R)E M D R E I T L V U D V A R(T)        | in.Oxidized methionine        | 121.17 | 488.5781 | 1447.721 | 15.9988  | 2.6   | 6.32    | 55323      | 6.02 HUMAN  | BT8W13               | Tyrosine protein 1 subunit zeta                                              |
| 25424 | dirMS_041712_NAR_60mM_minus.11971.11971.3  | 3 | 3.52 | 1 | 2.41E+05 | (R)RLADN1 (R)R L A D N T V L A V V K(S)            | n.N-acetylglucosamine (N)     | 126.9  | 468.2618 | 1199.711 | 203.062  | -13.7 | 8.75    | 77484.4    | 6.25 HUMAN  | ET6M8                | Tyrosine protein kinase Fes/Php                                              |
| 25425 | dirMS_041712_NAR_60mM_minus.13704.13704.3  | 3 | 3.52 | 1 | 2.79E+05 | (R)RLADN1 (R)R L A D N T V L A V V K(S)            | n.N-acetylglucosamine (N)     | 126.9  | 468.2618 | 1199.711 | 203.062  | -13.7 | 8.75    | 77484.4    | 6.25 HUMAN  | ET6M8                | Tyrosine protein kinase Fes/Php                                              |
| 25426 | dirMS_041712_NAR_60mM_minus.13789.13789.3  | 3 | 3.52 | 1 | 2.42E+05 | (K)JASAEK (K)J A S V A Q R E L V A C G K V(K)      | n.N-acetylglucosamine (N)     | 136.62 | 505.2679 | 1399.765 | 114.0239 | -12.5 | 8.79    | 26018.7    | 6.1 HUMAN   | Q5TCLG               | Talin 1                                                                      |
| 25427 | dirMS_041712_NAR_60mM_minus.8766.8766.3    | 3 | 3.52 | 1 | 3.21E+04 | (R)FVQDQF (R)F V Q D Q V C I A R(K)                | C.Carcinoma methionine        | 109.12 | 455.2427 | 1363.715 | -0.015   | -1.1  | 6.75    | 53458.1    | 5.47 HUMAN  | H38R35               | Eukaryotic peptide chain release factor GTP-binding subunit ERF3A (Fragment) |
| 25428 | dirMS_041712_NAR_120mM_plus.4800.4800.3    | 3 | 3.52 | 0 | 4.66E+03 | (R)M7SM (R)M 7 T M S M M M H G R(N)                | in.Oxidized methionine        | 77.6   | 403.8446 | 117.527  | 31.918   | 1.6   | 9.75    | 23047.2    | 9.95 HUMAN  | PA6782               | 40S ribosomal protein S5                                                     |
| 25429 | dirMS_041712_NAR_120mM_plus.7967.7967.2    | 2 | 3.52 | 0 | 2.60E+05 | (K)HSDJLQ (K)H S D J L Q L U M R(K)                | C.Carcinoma methionine        | 95.58  | 495.7341 | 918.461  | -0.005   | -0.6  | 9.75    | 10225.7    | 7.97 HUMAN  | FA4548               | Signal recognition particle 9 kDa protein                                    |
| 25430 | dirMS_041712_NAR_20mM_plus.11378.11378.2   | 2 | 3.52 | 0 | 6.82E+03 | (R)IGDKAG (R)I G D K A G L V T V K I(C)            | C.Carcinoma methionine        | 149.13 | 655.8428 | 1310.677 | 0.001    | 0.8   | 8.26    | 24278.5    | 8.98 HUMAN  | HT0493               | Electron transfer flavocytochrome subunit alpha, mitochondrial               |
| 25431 | dirMS_041712_NAR_20mM_plus.12571.12571.2   | 2 | 3.52 | 1 | 1.31E+05 | (K)LDKTLQ (K)L D K T L Q R(F)                      |                               | 158.85 | 437.2558 | 875.515  | -0.109   | -12.5 | 8.75    | 42217.6    | 6.36 HUMAN  | AZ8U49               | Hydroxylase kinase                                                           |
| 25432 | dirMS_041712_NAR_20mM_plus.18865.18865.3   | 3 | 3.52 | 0 | 1.01E+05 | (R)JAAVPS (R)J A A V P S G A S T G Y E A L E R(D)  |                               | 201.5  | 602.3183 | 1804.94  | -0.036   | -2    | 4.53    | 43048.9    | 4.99 HUMAN  | BT22X9               | Enolase                                                                      |
| 25433 | dirMS_041712_NAR_20mM_plus.7778.7778.2     | 2 | 3.52 | 0 | 6.97E+04 | (R)JAYDQI (R)J A Y D Q I V D V A R(K)              |                               | 123.52 | 483.2393 | 965.469  | -0.026   | 2.7   | 4.37    | 43737.3    | 5.26 HUMAN  | FBV279               | Keratin, type I cytoskeletal L8                                              |
| 25434 | dirMS_041712_NAR_20mM_plus.11301.11301.3   | 3 | 3.52 | 0 | 3.16E+04 | (R)JAYDQI (R)J A Y D Q I V D V A R(K)              |                               | 123.52 | 483.2393 | 965.469  | -0.026   | 2.7   | 4.37    | 43737.3    | 5.26 HUMAN  | FBV279               | Keratin, type I cytoskeletal L8                                              |
| 25435 | dirMS_041712_NAR_40mM_plus.1284.1284.2     | 2 | 3.52 | 0 | 2.97E+04 | (R)JAGDLS (R)J A G D L S V V S S I R(K)            |                               | 141.92 | 540.2954 | 1079.584 | -0.009   | -0.8  | 9.75    | 24161.9    | 5.27 HUMAN  | FB2C09               | SAP domain-containing ribonucleoprotein                                      |
| 25436 | dirMS_041712_NAR_40mM_plus.16564.16564.3   | 3 | 3.52 | 1 | 1.42E+05 | (K)LLMAYK (K)L L M A Y S A V G L S S R M(K)        | C.N-acetylglucosamine 5(Donm) | 164    | 601.3202 | 1582.862 | 219.0389 | 5.3   | 9.99    | 25629.8    | 9.3 HUMAN   | J3K1M6               | Protein KIAA0368                                                             |
| 25437 | dirMS_041712_NAR_40mM_plus.6855.6855.2     | 2 | 3.52 | 0 | 5.95E+04 | (K)KCTTSL (K)K C T T S L V N R(K)                  | C.N-acetylglucosamine         | 100.58 | 569.7569 | 1138.498 | -0.008   | 7.5   | 6       | 57751.3    | 6.9 HUMAN   | BT7W90               | Serum albumin                                                                |
| 25438 | dirMS_041712_NAR_50mM_plus.13827.13827.3   | 3 | 3.52 | 1 | 5.97E+05 | (K)GGVPEV (K)G G V P E V S E A R D V F E K(A)      | C.N-acetylglucosamine (S)     | 141.28 | 638.9735 | 1514.908 | -0.002   | -1.1  | 4.8     | 33378      | 9.54 HUMAN  | Q15149               | Plectin                                                                      |
| 25439 | dirMS_041712_NAR_50mM_plus.16137.16137.3   | 3 | 3.52 | 0 | 2.73E+04 | (R)GVDLGR (R)G V D L G R Q A Q V E K(A)            |                               | 152.35 | 529.2635 | 1382.666 | 203.1101 | 19.4  | 5.32    | 23934.6    | 8.71 HUMAN  | PS1020               | Ras-related protein Rab-5B                                                   |
| 25440 | dirMS_041712_NAR_60mM_plus.11451.11451.3   | 3 | 3.52 | 0 | 4.84E+05 | (K)NFYVEH (K)N F Y V E H P E V A R(L)              |                               | 117.65 | 454.2286 | 1360.664 | 0.068    | 5     | 5.4     | 73202      | 9.19 HUMAN  | CJ9M55               | Probable ATP-dependent RNA helicase DDX17                                    |
| 25441 | dirMS_041712_NAR_60mM_plus.13062.13062.2   | 2 | 3.52 | 0 | 6.28E+05 | (K)NLSNPP (K)N L N S P P S S G V V P K(E)          | n.N-acetylglucosamine (N)     | 125.17 | 732.3483 | 1260.618 | 203.0715 | -5.4  | 8.75    | 45094.4    | 6.38 HUMAN  | BD4N7K               | RNA polymerase II elongation factor ELI2                                     |
| 25442 | dirMS_041712_NAR_60mM_plus.18505.18505.3   | 3 | 3.52 | 1 | 1.01E+06 | (R)YVSTFEL (R)Y V S T F E L A D K V V P K(T)       |                               | 155.47 | 460.5914 | 1379.575 | 0.027    |       |         |            |             |                      |                                                                              |



|       |                                            |   |      |           |                                                 |        |          |          |          |       |      |          |             |          |                                                                              |
|-------|--------------------------------------------|---|------|-----------|-------------------------------------------------|--------|----------|----------|----------|-------|------|----------|-------------|----------|------------------------------------------------------------------------------|
| 25611 | dirMS_041712_NAR_30mM_plus2.9063.9063.2    | 2 | 3.47 | 0.538E+05 | (KIQADV)(KIQ)A D(V)/N/V/A N(K)L                 | 100.82 | 536.2922 | 1071.579 | -0.0002  | -2    | 5.84 | 573912   | 6.29 HUMAN  | DC1375   | D-3-phosphoglycerate dehydrogenase                                           |
| 25612 | dirMS_041712_NAR_40mM_plus2.11382.11382.3  | 3 | 3.47 | 0.353E+04 | (RIVLSVSR)(R) V(V)/S/V/S G Q(H) T V L V(K)D     | 143.85 | 575.0089 | 1723.011 | 0.0009   | 0.5   | 8.73 | 45242.7  | 7.24 HUMAN  | P18754   | Regulator of chromosome condensation                                         |
| 25613 | dirMS_041712_NAR_40mM_plus2.1132E+05       | 3 | 3.47 | 1.132E+05 | (KIVNMM)(KIVN)M Q(V)N S(E) L(V)K(V)D            | 159.7  | 643.3666 | 1920.516 | -0.0019  | 15.9  | 8.63 | 2799.9   | 6.66 HUMAN  | ENH1     | Drosophila protein                                                           |
| 25614 | dirMS_041712_NAR_40mM_plus2.18282.18282.3  | 3 | 3.47 | 0.186E+05 | K27K2                                           | 173.83 | 575.0089 | 1819.984 | 0.0012   | 0.9   | 4.37 | 89953.6  | 7.51 HUMAN  | P15383   | Gc-rich sequence DNA-binding factor 2                                        |
| 25615 | dirMS_041712_NAR_50mM_plus2.11051.11051.3  | 3 | 3.47 | 1.411E+04 | M278m                                           | 125.45 | 512.9356 | 1547.799 | -0.0007  | 0.8   | 4.56 | 85679.3  | 7.65 HUMAN  | MB1R1    | Microtubule-associated protein                                               |
| 25616 | dirMS_041712_NAR_50mM_plus2.6800.6800.3    | 3 | 3.47 | 0.276E+04 | M89m                                            | 100.47 | 493.935  | 1463.777 | 16.013   | 12.2  | 10   | 24799.7  | 5.16 HUMAN  | C9P0C    | 26S proteasome non-ATPase regulatory subunit 2                               |
| 25617 | dirMS_041712_NAR_50mM_plus2.7001.7001.3    | 3 | 3.47 | 1.169E+05 | M643m                                           | 101.65 | 427.222  | 1149.603 | 130.007  | -1.1  | 8.99 | 232072.1 | 5.71 HUMAN  | ENH2F9   | FANCD1 protein                                                               |
| 25618 | dirMS_041712_NAR_50mM_plus2.9745.9745.3    | 3 | 3.47 | 1.122E+05 | (KIVNSIKV)(K) V(N)S/L(A) F(R)E(K)E              | 118.35 | 425.9225 | 1275.742 | 0.011    | 8.6   | 8.72 | 56564.1  | 6.56 HUMAN  | BD0W0    | Aminocyclase-1                                                               |
| 25619 | dirMS_041712_NAR_60mM_plus2.13231.13231.3  | 3 | 3.47 | 0.777E+05 | M1m                                             | 125.95 | 417.8778 | 1235.624 | 15.9947  | -0.2  | 6.5  | 45508.6  | 5.5 HUMAN   | AKB702   | Heat shock cognate 71 kDa protein                                            |
| 25620 | dirMS_041712_NAR_60mM_plus2.15851.15851.3  | 3 | 3.47 | 0.448E+05 | (RIVVVYV)(R) V(V)/Y/V/S N I(D) G T(H) A(K)T     | 139.77 | 534.9464 | 1602.828 | -0.0028  | -1.8  | 6.71 | 63374.2  | 8.64 HUMAN  | P06744   | Glucose-6-phosphate isomerase                                                |
| 25621 | dirMS_041712_NAR_60mM_plus2.21070.21070.3  | 3 | 3.47 | 2.107E+05 | (KIKVGEK)(K) V(Y)E Q(V)E P(R) L(I)K(E)          | 173.7  | 519.9722 | 1557.0   | 0.0201   | 1.4   | 6.2  | 91500.4  | 7.05 HUMAN  | BLA4D8   | Plectin                                                                      |
| 25622 | dirMS_041712_NAR_120mM_minus.15229.15229.3 | 3 | 3.46 | 1.128E+05 | (RIVLITR)(R) L(V)I/T(Q)S(L)E(L)K(V)D            | 136.42 | 452.271  | 1366.811 | -0.0115  | 8.4   | 6.6  | 67732.1  | 4.71 HUMAN  | ENH119   | DBIRD complex subunit KIAA1967                                               |
| 25623 | dirMS_041712_NAR_120mM_minus.6102.6102.3   | 3 | 3.46 | 2.120E+05 | (KIKAKNK)(K) A(N)/N E(S) P(D) T(R)S             | 87.68  | 463.2365 | 1387.692 | 0.0025   | 1.8   | 8.59 | 79741.9  | 9.67 HUMAN  | Q9HC55   | Band 4.1-like protein 4A                                                     |
| 25624 | dirMS_041712_NAR_120mM_minus.7057.7057.3   | 3 | 3.46 | 1.374E+05 | (KIDSVYGD)(K) S(V)/V G(E)A(Q)S(R)G              | 149.27 | 452.2134 | 1354.623 | 0.0023   | 1.7   | 4.56 | 32616.5  | 5.18 HUMAN  | ANL76    | Actin, alpha skeletal muscle                                                 |
| 25625 | dirMS_041712_NAR_120mM_minus.7197.7197.3   | 3 | 3.46 | 1.550E+05 | (RISKIQE)(R)S K(Q)A L(E)A(L)A(R)Q               | 93.17  | 411.2157 | 1231.628 | 0.0048   | 1.9   | 4.78 | 533778   | 5.74 HUMAN  | Q15149   | Plectin                                                                      |
| 25626 | dirMS_041712_NAR_20mM_plus2.11994.11994.2  | 2 | 3.46 | 0.438E+05 | M313m                                           | 169.78 | 761.8757 | 1559.725 | -0.0025  | -1.6  | 4.03 | 43773.3  | 5.26 HUMAN  | FRV29    | Keratin, type I cytoskeletal 18                                              |
| 25627 | dirMS_041712_NAR_30mM_minus.4885.4885.2    | 2 | 3.46 | 0.115E+05 | (RIENDFE)(R) N(D)E(F)C(K)M                      | 80.18  | 471.188  | 941.367  | 0.0018   | 1.9   | 4.14 | 36856.1  | 8.55 HUMAN  | HY014A   | Sorbitol dehydrogenase                                                       |
| 25628 | dirMS_041712_NAR_30mM_minus.5860.5860.2    | 2 | 3.46 | 1.136E+05 | (KIFGLQE)(K)G R(L)Q(E)A(K)L                     | 86.08  | 401.2385 | 801.458  | 0.012    | 1.5   | 8.75 | 25375.4  | 5.15 HUMAN  | HY0X1    | Cytoplasmic dynein 2 heavy chain 1 (Fragment)                                |
| 25629 | dirMS_041712_NAR_30mM_minus.8465.8465.2    | 2 | 3.46 | 0.927E+04 | (KIFGSPK)(K) F(C)/S(P)Q(K)                      | 100.43 | 510.7635 | 1020.53  | -0.0098  | -9.6  | 9.75 | 193207   | 8.14 HUMAN  | Q4VWC0   | Probable cation-transporting ATPase 13A5                                     |
| 25630 | dirMS_041712_NAR_40mM_minus.13593.13593.3  | 3 | 3.46 | 0.978E+03 | M134m                                           | 153.33 | 631.6641 | 1679.393 | 219.0483 | -13.8 | 6.05 | 58563.8  | 10.1 HUMAN  | Q8T0R2   | Serine/threonine-protein kinase 35                                           |
| 25631 | dirMS_041712_NAR_50mM_minus.13288.13288.3  | 3 | 3.46 | 1.232E+04 | (RITVLEL)(R)T Q(L)E/L(A)P(T)A(L)R(K)T           | 143.82 | 555.9883 | 1665.951 | -0.003   | -1.8  | 8.91 | 18460.6  | 5.48 HUMAN  | CV9M4    | Glycogen [starch] synthase, muscle (Fragment)                                |
| 25632 | dirMS_041712_NAR_50mM_minus.15426.15426.3  | 3 | 3.46 | 1.105E+05 | (KIFVALY)(K) Y(A) L(V)Q(L)P(L)A(F)R(K)          | 155.65 | 504.9453 | 1512.821 | 0.0004   | 0.3   | 8.49 | 42989.1  | 4.45 HUMAN  | BK3N78   | Nucleosome assembly protein 1-like 1                                         |
| 25633 | dirMS_041712_NAR_120mM_plus.10743.10743.3  | 3 | 3.46 | 0.478E+05 | S1470s                                          | 109    | 434.9023 | 1099.626 | 203.0665 | 0.99  | 9.75 | 204372.7 | 5.9 HUMAN   | P16144-3 | Isoform beta-4B of Integrin beta-4                                           |
| 25634 | dirMS_041712_NAR_20mM_plus.11271.11271.2   | 2 | 3.46 | 0.145E+05 | (RIVYADK)(R) P(A)U(A)D(Y)T(E)T(M)E              | 135.35 | 689.3157 | 1337.626 | -0.0019  | -1.4  | 4.37 | 22956    | 8.88 HUMAN  | EP92Z5   | Cofilin-1                                                                    |
| 25635 | dirMS_041712_NAR_20mM_plus.14710.14710.2   | 2 | 3.46 | 2.117E+05 | M055m                                           | 172.88 | 888.3999 | 1352.678 | -0.0006  | 0.3   | 8.69 | 68971.3  | 7.87 HUMAN  | BD4F52   | Protein kinase C theta type                                                  |
| 25636 | dirMS_041712_NAR_20mM_plus.17322.17322.3   | 3 | 3.46 | 0.190E+04 | S189s                                           | 190.05 | 563.9558 | 1486.795 | 203.0581 | -12.6 | 9.81 | 26651.2  | 9.48 HUMAN  | EP93C3   | Uncharacterized protein Corf34 (Fragment)                                    |
| 25637 | dirMS_041712_NAR_20mM_plus.8695.8695.3     | 3 | 3.46 | 0.141E+05 | M224m                                           | 130.62 | 630.6038 | 1573.804 | 15.9926  | -1.6  | 6    | 25541.5  | 9.02 HUMAN  | EP9L09   | 40S ribosomal protein S3                                                     |
| 25638 | dirMS_041712_NAR_20mM_plus.4215.4215.2     | 2 | 3.46 | 0.289E+05 | M367m                                           | 169.77 | 494.7017 | 956.408  | 31.9884  | -1.4  | 9.75 | 77799.7  | 9.09 HUMAN  | PS2272   | Heterogeneous nuclear ribonucleoprotein M                                    |
| 25639 | dirMS_041712_NAR_40mM_plus.2548.2548.2     | 2 | 3.46 | 1.311E+05 | M245m                                           | 166.35 | 425.2903 | 951.405  | -0.0001  | -0.3  | 8.65 | 29079.23 | 9.03 HUMAN  | Q9L073   | Nucleic acid domain-containing actin-binding protein                         |
| 25640 | dirMS_041712_NAR_40mM_plus.9313.9313.2     | 2 | 3.46 | 0.456E+05 | (RIVGDFG)(R) D(P)Y(G)G(D)S(R)D                  | 116.57 | 507.2256 | 1013.432 | 0.0116   | 11.5  | 4.21 | 65763.5  | 9.81 HUMAN  | Q9HC05   | Nuclear receptor coactivator 5                                               |
| 25641 | dirMS_041712_NAR_50mM_plus.20355.20355.3   | 3 | 3.46 | 0.985E+04 | (RIVYLLR)(R)D Y(L)H(L)P(E)VA(V)A(T)R(K)         | 174.38 | 578.658  | 1733.959 | 0.001    | 0.6   | 5.32 | 19924.8  | 9.99 HUMAN  | GU2211   | 40S ribosomal protein S10                                                    |
| 25642 | dirMS_041712_NAR_50mM_plus.21870.21870.3   | 3 | 3.46 | 0.162E+04 | (KIGHYTE)(K)G H(Y)T(E)G(E)I(L)VI(D)S(V)D(V)R(K) | 145.19 | 553.6688 | 1958.982 | 0.0101   | 5.1   | 4.31 | 42831.5  | 4.86 HUMAN  | AK854    | HCG19830A, isoform CRA_1                                                     |
| 25643 | dirMS_041712_NAR_50mM_plus.2341.7341.3     | 3 | 3.47 | 1.778E+05 | (KISGSSV)(K)G H(Y)T(E)G(E)I(L)VI(D)S(V)D(V)R(K) | 104.25 | 578.658  | 1288.796 | 0.0027   | -4.4  | 8.31 | 59392.3  | 6.81 HUMAN  | GRU1G1   | Structural maintenance of chromosomes protein 35                             |
| 25644 | dirMS_041712_NAR_60mM_plus.15357.15357.3   | 3 | 3.46 | 1.537E+05 | (RIVVVVY)(R) V(N)W(Y)T(E)K(K)E                  | 137.58 | 412.5761 | 1235.710 | -0.0009  | -0.7  | 10   | 10004.6  | 11.56 HUMAN | EP93D0   | 40S ribosomal protein S30                                                    |
| 25645 | dirMS_041712_NAR_60mM_plus.8206.8206.3     | 3 | 3.46 | 0.268E+06 | M3128m                                          | 101.47 | 419.2169 | 1239.64  | 15.996   | 0.8   | 8.47 | 407515.3 | 5.14 HUMAN  | O60494   | Cubilin                                                                      |
| 25646 | dirMS_041712_NAR_120mM_minus.7078.7078.4   | 4 | 3.45 | 1.656E+04 | K97E                                            | 93.12  | 479.2322 | 1799.874 | 114.0235 | -5.5  | 4.87 | 11987.6  | 9.52 HUMAN  | EP9167   | Ubiquitin B heavy chain (Fragment)                                           |
| 25647 | dirMS_041712_NAR_120mM_minus.7637.7637.3   | 3 | 3.45 | 1.352E+05 | (KIQWQPK)(K) Q(D)K(E)G(I)P(P)D(Q)Q(K)E          | 96.85  | 308.9801 | 1525.781 | -0.0015  | -1    | 4.56 | 17271.6  | 6.75 HUMAN  | BD4V12   | Ubequin                                                                      |
| 25648 | dirMS_041712_NAR_20mM_minus.10404.10404.2  | 2 | 3.45 | 1.673E+04 | S176                                            | 153.2  | 827.9072 | 1451.756 | 203.0968 | -17.2 | 8.59 | 3907.7   | 6.86 HUMAN  | Q9T0D5   | WD-repeat domain 8 (Fragment)                                                |
| 25649 | dirMS_041712_NAR_20mM_minus.10503.10503.2  | 2 | 3.45 | 1.433E+03 | (KIQGTEP)(K)K(G)E(T)P(D)G(I)W(K)T               | 153.68 | 659.8282 | 1318.664 | -0.0146  | -11.1 | 6.07 | 39438.5  | 10.1 HUMAN  | Q9H9L3   | Interferon-stimulated 20 kDa exonuclease-like 2                              |
| 25650 | dirMS_041712_NAR_20mM_minus.13034.13034.2  | 2 | 3.45 | 0.378E+05 | M355m                                           | 185.53 | 588.7948 | 1160.598 | 15.9843  | -9    | 4.37 | 28354    | 7.11 HUMAN  | BD4XB8   | 26S proteasome non-ATPase regulatory subunit 7                               |
| 25651 | dirMS_041712_NAR_20mM_minus.14567.14567.3  | 3 | 3.45 | 0.233E+03 | (RIADVPK)(R) P(V)P(A)S(L)E(L)A(V)S(V)R(A)       | 200.08 | 522.9653 | 1566.885 | -0.0032  | -2.3  | 6.05 | 533778   | 5.74 HUMAN  | Q15149   | Plectin                                                                      |
| 25652 | dirMS_041712_NAR_20mM_minus.1490.7490.2    | 2 | 3.45 | 1.155E+05 | M21m                                            | 121.23 | 478.1645 | 1164.512 | -0.0001  | 1.1   | 2.45 | 123.2    | 9.07 HUMAN  | Q9L0D1   | Perforin domain 1                                                            |
| 25653 | dirMS_041712_NAR_20mM_minus.9813.9813.2    | 2 | 3.45 | 1.214E+03 | (KIQWQK)(R)K D(L)G(A)S(E)G(S)G(A)K              | 148.4  | 660.3291 | 1319.68  | -0.0029  | -22.1 | 6.07 | 385966.4 | 5.72 HUMAN  | FRW1A1   | Immunoglobulin-like and fibronectin type III domain-containing protein 1     |
| 25654 | dirMS_041712_NAR_30mM_minus.11335.11335.2  | 2 | 3.45 | 0.781E+05 | (RISJSSJ)(R)S S(G)S(H)R(V)                      | 115.15 | 497.265  | 993.523  | 0.0003   | 0.3   | 9.51 | 39581.9  | 10.07 HUMAN | Q6AZW8   | Zinc finger protein 660                                                      |
| 25655 | dirMS_041712_NAR_30mM_minus.13057.13057.2  | 2 | 3.45 | 1.229E+05 | (KIFSNKA)(K) L(F)S(N)A(K)L                      | 124.19 | 404.2383 | 807.472  | -0.003   | -3.7  | 10   | 25871.8  | 9.96 HUMAN  | Q6G263   | Isoform 3 of Fanconi anemia-associated protein of 20 kDa                     |
| 25656 | dirMS_041712_NAR_30mM_minus.10867.10867.2  | 2 | 3.45 | 0.914E+04 | (KIVL13)(K)S V(L)G(D)V(L)F(L)K(D)               | 152.13 | 455.7903 | 912.482  | -0.0008  | 11.8  | 5.83 | 49548.2  | 6.29 HUMAN  | Q9T0D5   | Tetis-expressed sequence 10 protein                                          |
| 25657 | dirMS_041712_NAR_30mM_minus.2164.7164.2    | 2 | 3.45 | 0.196E+05 | M88m                                            | 92.77  | 550.7326 | 1084.462 | 15.9964  | 1.3   | 4.03 | 13588.1  | 4.66 HUMAN  | FRV9E7   | Keratin, type II cytoskeletal 8 (Fragment)                                   |
| 25658 | dirMS_041712_NAR_30mM_minus.9947.9947.2    | 2 | 3.45 | 0.127E+05 | (RIVTVEY)(R)T(T)Y(L)R(M)                        | 108.58 | 458.2372 | 915.457  | 0.0001   | 1.1   | 6    | 19901.3  | 7.97 HUMAN  | Q9UMY4   | Sorting nexin-12                                                             |
| 25659 | dirMS_041712_NAR_50mM_minus.11169.11169.3  | 3 | 3.45 | 1.110E+05 | (KIQGLST)(K)Q(L)S(V)T(L)K(L)K                   | 131.23 | 420.8783 | 1259.72  | -0.002   | -0.2  | 5.96 | 21156.2  | 9.41 HUMAN  | PS5145   | Mesencephalic astrocyte-derived neurotrophic factor                          |
| 25660 | dirMS_041712_NAR_50mM_plus.10452.10452.3   | 3 | 3.45 | 1.213E+05 | (KIKLLDK)(K)S L(A)G(D)V(L)F(L)K(D)              | 164.12 | 411.5911 | 1232.761 | -0.0025  | -2.1  | 8.31 | 41827.5  | 7 HUMAN     | U737A9   | Phosphoglycerate kinase                                                      |
| 25661 | dirMS_041712_NAR_50mM_plus.1746.1746.3     | 3 | 3.45 | 2.523E+05 | (RIVLLDQ)(R) L(L)D(Q)G(V)Q(L)D(D)Y(G)K          | 168.12 | 488.4528 | 1373.852 | -0.0007  | -0.5  | 7.4  | 18490.8  | 6.81 HUMAN  | EP91A3   | Histone dehydrogenase-like dehydroase domain-containing protein 2 (Fragment) |
| 25662 | dirMS_041712_NAR_50mM_minus.8605.8605.3    | 3 | 3.45 | 1.713E+04 | M73m                                            | 116.82 | 613.9753 | 1823.893 | 16.0182  | 12.7  | 8.5  | 49919.3  | 5.71 HUMAN  | PD4180   | Phosphatidylcholine-sterol acyltransferase                                   |
| 25663 | dirMS_041712_NAR_60mM_minus.10668.10668.3  | 3 | 3.45 | 0.931E+05 | (KIVHPTL)(K)K(V)T(P)L(F)G(N)V(K)K               | 120.27 | 420.2346 | 1258.694 | -0.005   | -4    | 8.76 | 74874.4  | 8.54 HUMAN  | GP91W4   | Fidgin-like protein 1                                                        |
| 25664 | dirMS_041712_NAR_60mM_minus.11531.11531.3  | 3 | 3.45 | 0.743E+04 | (RIQGTMA)(R)Q(G)T(M)A(L)P(L)R(L)                | 122.25 | 424.5804 | 1271.714 | 0.0126   | 9.9   | 9.75 | 55117.9  | 9.82 HUMAN  | HP80     |                                                                              |



|       |                                             |   |      |                  |                                                      |        |          |           |          |       |      |          |       |       |        |                                                                             |
|-------|---------------------------------------------|---|------|------------------|------------------------------------------------------|--------|----------|-----------|----------|-------|------|----------|-------|-------|--------|-----------------------------------------------------------------------------|
| 25720 | dirMS_041712_NAR_30mM_plus2.7217.7217.2     | 2 | 3.44 | 0.378E+04        | (KLSLEINS)(K)S L E / S / V N / R (R)                 | 92.13  | 453.2369 | 905.4669  | -0.0022  | 2.4   | 5.72 | 12826.8  | 9.82  | HUMAN | ESR899 | 60S ribosomal protein L30 (Fragment)                                        |
| 25721 | dirMS_041712_NAR_40mM_plus2.10119.10119.3   | 3 | 3.44 | 0.515E+04        | (KKEVWPK)(K)K V V K V P P / T J P P / P A V S (K)    | 123.87 | 517.6421 | 1550.9135 | -0.0035  | -2.2  | 8.69 | 6542.1   | 9.24  | HUMAN | Q9R64A | P0Z and LIM domain protein 5                                                |
| 25722 | dirMS_041712_NAR_40mM_plus2.5694.5694.3     | 3 | 3.44 | 0.102E+05        | (KAGKGF)(K)K G G T T D E U L E I / F E G M (K)P      | 90.75  | 419.6737 | 1260.8107 | -0.0007  | 2.9   | 4.8  | 2392.2   | 6.24  | HUMAN | Q91287 | 60 kDa heat shock protein, mitochondrial                                    |
| 25723 | dirMS_041712_NAR_40mM_plus2.15791.15791.3   | 3 | 3.44 | 0.118E+05        | (KKEVWPK)(K)K V V K V P P / T J P P / P A V S (K)    | 151.55 | 566.9788 | 1627.9007 | -0.0015  | 8.9   | 8.59 | 10305.6  | 6.94  | HUMAN | HT0330 | CAMP-dependent protein kinase type II-alpha ribonucleo protein (Fragment)   |
| 25724 | dirMS_041712_NAR_50mM_plus2.17416.17416.3   | 3 | 3.44 | 0.503E+04        | (R)IPLLEIRL(R)P L E V / F L V / F Q E / A M (K)G     | 159.73 | 553.9791 | 1659.9033 | 0.0021   | 12.1  | 4.25 | 13940.22 | 5.9   | HUMAN | Q9N366 | 1-phosphatidylinositol 4,5-bisphosphate phosphodiesterase beta-1            |
| 25725 | dirMS_041712_NAR_50mM_plus2.17579.17579.3   | 3 | 3.44 | 0.751E+05 M918m  | (K)IVVGA(L)(K)P V V E G A L Q M A E / I L M (K)Q(L)  | 160.43 | 553.9791 | 1644.922  | 16.0005  | 3.3   | 6    | 22289.5  | 9.18  | HUMAN | Q14669 | E ubiquitin-protein ligase TRIP12                                           |
| 25726 | dirMS_041712_NAR_50mM_plus2.18460.18460.3   | 3 | 3.44 | 1.235E+05        | (K)DQARTN(K)G T T T D E U L E I / F E G M (K)P       | 159.92 | 462.3071 | 1484.9    | 0.007    | 2.9   | 4.8  | 2392.2   | 6.24  | HUMAN | Q72684 | 60 kDa heat shock protein, mitochondrial (Fragment)                         |
| 25727 | dirMS_041712_NAR_50mM_plus2.2366.936.3      | 3 | 3.44 | 1.429E+05 Y3bY   | (R)ICCTAAT(R)K C T T A P P R G G / S I C (K)R        | 116.6  | 643.2708 | 1847.835  | 79.9629  | -1.8  | 9.99 | 55154.3  | 5.57  | HUMAN | Q43790 | Keratin, type II cuticular Hb5                                              |
| 25728 | dirMS_041712_NAR_60mM_plus2.10833.10833.3   | 3 | 3.44 | 1.166E+06 M2m310 | (I)KMEKEE(I)K M E E K E L / Q A / S (K)N             | 114.45 | 467.8876 | 1305.672  | 95.9764  | 10.8  | 4.79 | 15880    | 4.92  | HUMAN | HOY814 | Dedicator of cytokinesis protein 5 (Fragment)                               |
| 25729 | dirMS_041712_NAR_60mM_plus2.5426.5426.3     | 3 | 3.44 | 1.158E+05 T1477  | (R)IQE(LK)(K)Q V E L K L E / N S / G G (K)K          | 85.63  | 506.9426 | 1315.572  | 203.0916 | 8.1   | 6.14 | 60279.9  | 5.91  | HUMAN | ABMP88 | Meckel syndrome type 1 protein                                              |
| 25730 | dirMS_041712_NAR_60mM_plus2.9249.9249.3     | 3 | 3.44 | 0.462E+05 S3178  | (R)YVQNT(R)R V V V Q / Y N / F A S (K)C              | 103.78 | 475.2309 | 1220.595  | 203.0835 | 2.9   | 8.47 | 21587.62 | 7.38  | HUMAN | FHS456 | Receptor-type tyrosine-protein phosphatase beta                             |
| 25731 | dirMS_041712_NAR_120mM_minus2.1829.1829.3   | 3 | 3.43 | 1.292E+05        | (K)EESCAE(I)E G A A R L L / I G G (K)T               | 154.8  | 514.9641 | 1542.8    | 0.0211   | 12.1  | 6.14 | 15941.3  | 6.14  | HUMAN | CIU929 | Zinc finger protein 745                                                     |
| 25732 | dirMS_041712_NAR_120mM_minus2.0401.2401.4   | 4 | 3.43 | 2.211E+05        | (K)NTLSSG(K)M T A L G S D / P R I K T E I E A (K)N   | 167.7  | 500.2804 | 1998.123  | -0.0232  | -11.6 | 6.18 | 69970.5  | 9.38  | HUMAN | FSH0Y0 | Maternal embryonic leucine zipper kinase                                    |
| 25733 | dirMS_041712_NAR_120mM_minus2.7290.7290.3   | 3 | 3.43 | 1.918E+04 T1821  | (R)EVL(LK)E L A L E / V R / S E (K)                  | 93.57  | 476.2347 | 1346.716  | 79.9734  | 4.9   | 4.49 | 102247.6 | 9.19  | HUMAN | A2AVZK | Glutamate (NMDA) receptor subunit zeta-1                                    |
| 25734 | dirMS_041712_NAR_30mM_minus2.11707.11707.2  | 2 | 3.43 | 0.884E+05        | (K)GGDVL(K)G G V D / V F R A (K)K                    | 117    | 455.2306 | 909.45    | 0.0041   | 4.5   | 5.84 | 26091.9  | 4.7   | HUMAN | PS1858 | Hepatoma-derived growth factor                                              |
| 25735 | dirMS_041712_NAR_30mM_minus2.16350.16350.2  | 2 | 3.43 | 0.132E+05        | (K)LSYCTC(K)S I T G E T / G T A V A E (K)H           | 102.55 | 468.055  | 1326.678  | -0.114   | -8.5  | 6    | 40040.2  | 9.87  | HUMAN | Ser11  | Serine protease 21                                                          |
| 25736 | dirMS_041712_NAR_30mM_minus2.5905.5905.2    | 2 | 3.43 | 1.83E+05         | (K)NGVWTK(K)N G V W F T N S (K)K                     | 85.85  | 537.5066 | 994.532   | 79.9623  | -3.7  | 10   | 98062.5  | 5.57  | HUMAN | BAE222 | DNA mismatch repair protein Msh2                                            |
| 25737 | dirMS_041712_NAR_30mM_minus2.8172.8172.2    | 2 | 3.43 | 0.183E+05        | (K)SGGTG(K)G S I G T A / E V E (K)K                  | 98.32  | 495.7528 | 990.51    | -0.0119  | -1.2  | 4.53 | 30947.9  | 6.47  | HUMAN | H8BQ34 | Pyruvate kinase                                                             |
| 25738 | dirMS_041712_NAR_30mM_minus2.8721.8721.2    | 2 | 3.43 | 0.268E+05 K938   | (R)KEAGG(K)R V E A / G V R (R)R                      | 108.58 | 422.7411 | 730.421   | 114.0543 | 13.5  | 8.75 | 154176.6 | 6.37  | HUMAN | Q6T133 | Coiled-coil domain-containing protein 171                                   |
| 25739 | dirMS_041712_NAR_40mM_minus2.13303.13303.3  | 3 | 3.43 | 0.189E+05 K986   | (R)YVQVLE(R)R V S V Q L E A / S A F L A V P V E (K)E | 161.73 | 666.6932 | 1884.268  | 114.0174 | -11.8 | 4.53 | 22372.4  | 5.82  | HUMAN | HY01G6 | Alpha-2-macroglobulin (Fragment)                                            |
| 25740 | dirMS_041712_NAR_40mM_minus2.14947.14947.3  | 3 | 3.43 | 0.928E+05        | (R)YVQVLE(R)R V S V Q L E A / S A F L A V P V E (K)E | 172.32 | 640.3618 | 1919.071  | 0        | 1.8   | 6.75 | 61224.7  | 5.7   | HUMAN | PI1009 | 60 kDa heat shock protein, mitochondrial                                    |
| 25741 | dirMS_041712_NAR_50mM_minus2.12807.12807.3  | 3 | 3.43 | 1.112E+04 K164k  | (K)NOAIRQ(K)N Q A I A I R P E V Q A A P A (K)E       | 140.88 | 555.3037 | 1549.844  | 114.052  | 5.5   | 6.75 | 33581.2  | 11.07 | HUMAN | IBLOU5 | Coiled-coil domain-containing protein 137 (Fragment)                        |
| 25742 | dirMS_041712_NAR_50mM_minus2.13308.13308.3  | 3 | 3.43 | 1.232E+04        | (R)ITQVLE(R)Q V L E E / L S V L A P / P T A L K (R)R | 143.32 | 555.9883 | 1665.953  | -0.003   | -4.8  | 5.81 | 18460.6  | 5.14  | HUMAN | Q9YM4  | Glycogen (starch) synthase, muscle (Fragment)                               |
| 25743 | dirMS_041712_NAR_50mM_minus2.14280.14280.3  | 3 | 3.43 | 0.120E+04        | (K)ILVAGE(K)K L V A Q E A W A G / T T A M V G V (R)E | 146.88 | 600.9885 | 1800.943  | 0.0084   | 4.7   | 6    | 41303.4  | 5.48  | HUMAN | FRW813 | Obscurin                                                                    |
| 25744 | dirMS_041712_NAR_50mM_minus2.17506.17506.3  | 3 | 3.43 | 0.101E+06 M155m  | (R)ILHFT(R)R H F P P / P E / A P L S (K)R            | 155.25 | 546.2827 | 1620.835  | 16.0115  | 10.1  | 9.75 | 42230.8  | 4.77  | HUMAN | AN82X8 | Putative tubulin beta chain-like protein ENSP0000290317                     |
| 25745 | dirMS_041712_NAR_50mM_minus2.17828.17828.3  | 3 | 3.43 | 0.327E+04        | (K)ITLNLN(K)I T T L L N / Y L T V / G S H (K)R       | 170.32 | 554.3024 | 1660.891  | 0.0022   | 1.3   | 6.41 | 42238.2  | 4.88  | HUMAN | B4DNGS | COB domain-containing protein 3                                             |
| 25746 | dirMS_041712_NAR_60mM_minus2.1624.12614.3   | 3 | 3.43 | 1.564E+03        | (K)INQVVA(K)Q V A L V A L P N Q T F D A R L (K)I     | 130.18 | 605.6583 | 1814.951  | 0.0096   | 5.3   | 8.75 | 70336.2  | 5.48  | HUMAN | PO8107 | Heat shock 70 kDa protein 1A/1B                                             |
| 25747 | dirMS_041712_NAR_60mM_minus2.17106.17106.3  | 3 | 3.43 | 2.120E+05 Y354F  | (R)IATYER(K)R T V Y E / V W / V (R)R                 | 155.85 | 420.2191 | 1193.664  | 79.9787  | 9.8   | 9.99 | 55160.8  | 6.02  | HUMAN | Q8V08  | Phospholipase D3                                                            |
| 25748 | dirMS_041712_NAR_60mM_minus2.8782.878.3     | 3 | 3.43 | 1.321E+04 Y258k  | (R)IATYER(K)R T V Y E / V W / V (R)R                 | 109.12 | 412.216  | 1181.671  | 79.9787  | -14.1 | 6.14 | 102247.6 | 9.19  | HUMAN | Q91287 | Zinc finger and homeobox protein 1 (Fragment)                               |
| 25749 | dirMS_041712_NAR_120mM_minus2.21178.21178.2 | 2 | 3.43 | 2.279E+05        | (R)SDHPHS(R)S D H P K S T G E P T R E I E (K)S       | 164.12 | 481.7993 | 1922.977  | -0.0017  | -0.9  | 5.51 | 12592.8  | 5.71  | HUMAN | OBW89  | Testis-expressed sequence 2 protein                                         |
| 25750 | dirMS_041712_NAR_120mM_minus2.8641.8641.3   | 3 | 3.43 | 1.157E+05        | (R)RJTRE(R)R T E E G I P T L S V G (K)H              | 99.07  | 455.8929 | 1365.676  | -0.0116  | -8.5  | 6.14 | 100478.9 | 5.71  | HUMAN | ABMXP9 | Matrin-3                                                                    |
| 25751 | dirMS_041712_NAR_120mM_minus2.12740.12740.2 | 2 | 3.43 | 1.101E+04        | (R)IQMDRA(R)M D / R A / S (K)R                       | 105.87 | 507.7439 | 1014.479  | 0.002    | 2     | 6.75 | 126097.4 | 5.65  | HUMAN | Q8B03  | Protein KIBRA                                                               |
| 25752 | dirMS_041712_NAR_20mM_minus2.7180.7180.2    | 2 | 3.43 | 0.936E+05 M46m   | (R)EJGDTT(K)R T S G T S / I S T S G T S (K)R         | 117.32 | 713.208  | 1920.639  | 91.8555  | -10.1 | 9.75 | 51848.6  | 6.02  | HUMAN | Q20790 | Protein phosphatase cy1/crans isomerase FKBP4                               |
| 25753 | dirMS_041712_NAR_20mM_minus2.8259.8259.2    | 2 | 3.43 | 0.510E+04        | (R)RNVWD(R)R V V V I / V D / R (K)G                  | 127.05 | 443.7527 | 886.499   | -0.0011  | -1.3  | 4.21 | 23729.5  | 9.89  | HUMAN | CR017  | Non-PQI domain-containing actin-binding protein (Fragment)                  |
| 25754 | dirMS_041712_NAR_30mM_minus2.17163.17163.2  | 2 | 3.43 | 0.274E+05        | (R)SWYLR(R)R / S W / Y L / R (R)                     | 142.77 | 419.2286 | 837.462   | -0.0118  | -14.1 | 8.75 | 36157.9  | 8.85  | HUMAN | C19211 | Delta(3,5)-Delta(2,4)-dienoyl-CoA isomerase, mitochondrial                  |
| 25755 | dirMS_041712_NAR_30mM_plus2.20828.20828.2   | 2 | 3.43 | 0.780E+04        | (K)NLQEEE(K)M L Q E / I D / D A / S E (R)V           | 163.13 | 708.8513 | 1416.697  | -0.0012  | -0.8  | 4    | 15712.4  | 4.48  | HUMAN | EP9022 | Perforin subunit 4                                                          |
| 25756 | dirMS_041712_NAR_30mM_plus2.4471.4471.2     | 2 | 3.43 | 0.369E+05        | (R)YITSGR(R)R Y T S / P G S (K)R                     | 72.98  | 456.2155 | 911.422   | 0.002    | 2.2   | 8.46 | 19288.4  | 10.19 | HUMAN | FRW013 | Keratin, type II cytoskeletal 8 (Fragment)                                  |
| 25757 | dirMS_041712_NAR_40mM_plus2.8161.8161.2     | 2 | 3.43 | 0.470E+04        | (R)IYVLR(R)R / S Y / L / R (R)                       | 108.52 | 419.2273 | 831.447   | -0.0008  | -1.1  | 5.83 | 4379.3   | 5.26  | HUMAN | FRV029 | Keratin, type II cytoskeletal 18                                            |
| 25758 | dirMS_041712_NAR_50mM_plus2.11240.11240.3   | 3 | 3.43 | 2.455E+04        | (R)IQFLMN(R)F L M N S / K A S / D A K (K)K           | 126.6  | 522.9433 | 1566.81   | 0.0056   | 3.6   | 9.7  | 35878.9  | 9.15  | HUMAN | G3V118 | Protein phosphatase 1 regulatory subunit 2                                  |
| 25759 | dirMS_041712_NAR_50mM_plus2.16807.16807.3   | 3 | 3.43 | 1.114E+05 N239n  | (R)IQG5VY(R)Q G S Y S / K I H M A M (K)K             | 155.92 | 584.2981 | 1547.8    | 203.0799 | 0.3   | 9.7  | 169758   | 6.18  | HUMAN | E7E6Z2 | Protein polybromo-1 (Fragment)                                              |
| 25760 | dirMS_041712_NAR_50mM_plus2.17075.17076.3   | 3 | 3.43 | 1.101E+06        | (R)ITVTFE(R)R T V T V T E I G K D V (G) L R (I)      | 156.87 | 534.308  | 1600.927  | -0.0174  | -10.9 | 6.04 | 139883.7 | 8.06  | HUMAN | PS3621 | Coatomer subunit alpha                                                      |
| 25761 | dirMS_041712_NAR_50mM_plus2.18164.18164.3   | 3 | 3.43 | 1.935E+05        | (R)YVQVLE(R)R V S V Q L E A / S A F L A V P V E (K)E | 171.23 | 640.3618 | 1919.071  | -0.0014  | -2.7  | 2.3  | 17190.6  | 6.14  | HUMAN | Q91287 | Protein phosphatase 1 regulatory subunit 2                                  |
| 25762 | dirMS_041712_NAR_50mM_plus2.19786.19786.3   | 3 | 3.43 | 0.250E+05        | (K)YVHFKL(K)F L F H T S / L P L E A / P G (K)K       | 172.83 | 580.9943 | 1740.968  | 0        | 0     | 6.75 | 108105.4 | 6.57  | HUMAN | E7F0D0 | Protein transport protein Sec24C                                            |
| 25763 | dirMS_041712_NAR_60mM_plus2.10093.10093.3   | 3 | 3.43 | 1.128E+05        | (K)SDSCD(K)Q S D Q / E L V Y D (K)K                  | 109.98 | 466.8941 | 1398.657  | 0.0108   | 7.7   | 5.46 | 21156.2  | 9.31  | HUMAN | P55145 | Mesencephalic astrocyte-derived neurotrophic factor                         |
| 25764 | dirMS_041712_NAR_60mM_plus2.15665.15665.3   | 3 | 3.43 | 1.506E+04 T586t  | (K)SPNHV(K)K P P H X K E / I D F G L A R (L)         | 138.55 | 545.6107 | 1554.839  | 79.9788  | 7.7   | 8.49 | 109737   | 5.35  | HUMAN | B4DTR1 | Receptor tyrosine-protein kinase ephrB-2                                    |
| 25765 | dirMS_041712_NAR_60mM_plus2.18065.18065.3   | 3 | 3.43 | 1.111E+05        | (R)YVQVLE(R)R V S V Q L E A / S A F L A V P V E (K)E | 110.42 | 548.6028 | 1643.792  | 0.0018   | -1.1  | 6.07 | 19157.6  | 5.69  | HUMAN | B4D2M4 | Proteasome subunit alpha type-6                                             |
| 25766 | dirMS_041712_NAR_60mM_plus2.5539.5539.3     | 3 | 3.43 | 0.190E+06 M21m   | (K)SGSDH(R)R S G S V D / P S G A N H P S V (K)R      | 87.5   | 467.5464 | 1384.627  | 15.9973  | 1.7   | 6.46 | 48340.6  | 8.84  | HUMAN | Q07566 | Ki domain-containing, RN4-binding, signal transduction-associated protein 1 |
| 25767 | dirMS_041712_NAR_120mM_minus2.9606.9606.2   | 2 | 3.42 | 0.320E+04        | (K)HVFVIR(K)H V I V F / A Q (R)R                     | 107.08 | 485.2837 | 969.563   | -0.0027  | -2.8  | 9.75 | 21311.5  | 10.28 | HUMAN | B5MCP9 | 40S ribosomal subunit                                                       |
| 25768 | dirMS_041712_NAR_20mM_minus2.10638.10638.2  | 2 | 3.42 | 0.724E+04 M78m   | (K)TVLNLN(K)I T T L L N / Y L T V / G S H (K)R       | 154.37 | 445.7275 | 874.543   | 15.9947  | 0.3   | 8.41 | 11504.1  | 9.57  | HUMAN | K7E444 | Profilin 1, isoform CRA_b                                                   |
| 25769 | dirMS_041712_NAR_20mM_minus2.11390.11390.3  | 3 | 3.42 | 0.253E+04        | (R)INLCSL(R)R F L C S L Y S / N P S V (R)E           | 168.1  | 506.2517 | 1522.732  | 0.0087   | 5.7   | 6    | 45781.9  | 6.88  | HUMAN | F14062 | Indoleamine 2,3                                                             |

|       |                                            |   |      |   |          |          |                                                   |                                      |        |          |          |          |       |      |          |       |       |          |                                                        |
|-------|--------------------------------------------|---|------|---|----------|----------|---------------------------------------------------|--------------------------------------|--------|----------|----------|----------|-------|------|----------|-------|-------|----------|--------------------------------------------------------|
| 25829 | dirMS_041712_NAR_120mM_minus.17489.17489.4 | 4 | 3.4  | 2 | 8.56E-03 | T8921    | (RI)RHWLSL(R)I R W L V S D F V A A Q E K (K)F     | t.Nucleo[cytosine] (T)               | 150.65 | 499.5124 | 1791.975 | 203.0526 | -13.4 | 8.59 | 163805   | 6.67  | HUMAN | A2PYH4   | Probable ATP-dependent DNA helicase HFM1               |
| 25830 | dirMS_041712_NAR_120mM_minus.19324.19324.3 | 3 | 3.4  | 1 | 3.72E-05 | X266k    | (RI)ELLEK(R)I E V E L K (V)K A S (R)D             | k.Ligase (K)                         | 161.42 | 510.614  | 1415.785 | 114.0422 | -0.5  | 6.23 | 104369.4 | 5.94  | HUMAN | QZ782    | Alphacristin protein C10orf118                         |
| 25831 | dirMS_041712_NAR_120mM_minus.09212.09212.3 | 3 | 3.4  | 1 | 1.64E-05 | Y2612    | (K)STLPSKST(L)I P L D L V L R (K)R                | t.Ligase (K)                         | 122.47 | 516.2772 | 1013.548 | -0.0099  | -1.5  | 5.84 | 261613   | 5.58  | HUMAN | EP990    | Epilpakin                                              |
| 25832 | dirMS_041712_NAR_20mM_minus.14002.14002.3  | 3 | 3.4  | 0 | 9.84E-04 | Y2612    | (RI)LLAEKTA(R)I E L E T A T A I S A I E A M (K)K  | m.Oxidized methionine                | 192.37 | 587.8823 | 1761.93  | 0.0021   | 1.2   | 4.25 | 204795.5 | 5.16  | HUMAN | HY0259   | Nyxin phosphorylase rho-interacting protein (Fragment) |
| 25833 | dirMS_041712_NAR_20mM_minus.7655.7655.2    | 2 | 3.4  | 0 | 6.65E-05 | M239m    | (K)VEVDLQ(K)E V D E Q/M L N V (Q)N (K)K           | m.Oxidized methionine                | 125.12 | 731.843  | 1446.689 | 15.9884  | -3.8  | 4.14 | 40069.4  | 4.83  | HUMAN | E7EWR1   | Tubulin beta chain                                     |
| 25834 | dirMS_041712_NAR_20mM_minus.7829.7829.2    | 2 | 3.4  | 0 | 7.81E-04 | M406m    | (RI)EYDEL(R)I E Y Q E L M N V (K)K                | m.Oxidized methionine                | 128.13 | 585.2788 | 1153.556 | 15.9545  | -0.3  | 4.53 | 56607.4  | 5.37  | HUMAN | FBW04    | Keratin, type II cytoskeletal 8                        |
| 25835 | dirMS_041712_NAR_20mM_minus.8346.8346.2    | 2 | 3.4  | 0 | 1.40E-05 | Y2612    | (K)DVGSSA (K)D V G S S L A S V R (K)R             | m.Oxidized methionine                | 121.47 | 582.2015 | 1145.588 | -0.0009  | -1.2  | 4.47 | 261613   | 5.58  | HUMAN | EP990    | Epilpakin                                              |
| 25836 | dirMS_041712_NAR_30mM_minus.12850.12850.2  | 2 | 3.4  | 0 | 1.49E-05 | Y2612    | (R)TSSMLI(R)I Y T S L M L (R)D                    | m.Oxidized methionine                | 123.27 | 442.2405 | 883.471  | 0.0031   | 3.5   | 8.75 | 66876.9  | 6.17  | HUMAN | Q75083   | WD repeat-containing protein 1                         |
| 25837 | dirMS_041712_NAR_30mM_minus.16625.16625.2  | 2 | 3.4  | 0 | 2.63E-04 | Y2612    | (R)SSGLTA(R)I S G I (V)A L V M V (A)R(N)          | m.Oxidized methionine                | 144.03 | 573.8112 | 1146.627 | -0.0115  | -10   | 9.47 | 139883.7 | 8.06  | HUMAN | P53621   | Cotamer subunit alpha                                  |
| 25838 | dirMS_041712_NAR_30mM_minus.6252.6252.2    | 2 | 3.4  | 0 | 4.16E-05 | Y2612    | (K)YAEAVY(K)I V A I E V A T (R)A                  | m.Oxidized methionine                | 87.57  | 405.2098 | 809.415  | -0.0029  | -3.5  | 6    | 41827.5  | 7     | HUMAN | B772A9   | Phosphoglycerate kinase                                |
| 25839 | dirMS_041712_NAR_30mM_minus.7502.7502.2    | 2 | 3.4  | 0 | 3.25E-05 | M121m    | (R)KMSDEI(K)I M W S H E R (K)R                    | m.Oxidized methionine                | 95.22  | 456.2018 | 781.37   | 130.0268 | -12.1 | 8.5  | 21827.5  | 6.1   | HUMAN | C3B010   | Bromodomain-containing protein 9 (Fragment)            |
| 25840 | dirMS_041712_NAR_50mM_minus.13412.13412.3  | 3 | 3.4  | 0 | 3.28E-05 | Y2612    | (R)KQMEI(K)I E L V A H I V G T P G R (R)V         | m.Oxidized methionine                | 144.07 | 540.294  | 1041.97  | -0.0043  | -2.4  | 6.75 | 20895.9  | 4.8   | HUMAN | E1K825   | Epilpakin initiation factor 4a (Fragment)              |
| 25841 | dirMS_041712_NAR_50mM_minus.15668.15668.3  | 3 | 3.4  | 1 | 1.13E-05 | T3921    | (RI)LIIFPVPR(L)I F P V D G V V L E P (K)K         | t.Nucleo[cytosine] (T)               | 157.72 | 650.0294 | 1744.975 | 203.0992 | 10.2  | 6.07 | 94636    | 6.69  | HUMAN | E7EWM3   | Zinc finger MZ domain-containing protein 2             |
| 25842 | dirMS_041712_NAR_50mM_minus.17747.17747.3  | 3 | 3.4  | 1 | 1.00E-04 | Y2612    | (K)QKLDLQ(K)I L K L D P S I (F) I F (K)R          | k.Ligase (K)                         | 169.85 | 549.3073 | 1645.916 | -0.0086  | -5.2  | 6.07 | 35067    | 5.55  | HUMAN | E7ETR0   | RuB-like 1                                             |
| 25843 | dirMS_041712_NAR_60mM_minus.12628.12628.3  | 3 | 3.4  | 1 | 2.63E-05 | Y2612    | (RI)EMDRTE(R)I M D R (T) E L U D V A (R)T         | m.Oxidized methionine                | 129.75 | 483.2454 | 1447.721 | 0.0007   | 0.5   | 4.32 | 55323    | 6.02  | HUMAN | B4DF19   | T-complex protein 1 subunit zeta                       |
| 25844 | dirMS_041712_NAR_60mM_minus.15077.15077.3  | 3 | 3.4  | 1 | 3.39E-05 | Y2612    | (K)MELQLK(K)I A K E L Q V (K)Q (V)A (K)K          | m.Oxidized methionine                | 144.37 | 506.9421 | 1518.816 | -0.0045  | -3    | 4.68 | 23903    | 4.54  | HUMAN | HY0191   | Plectin (Fragment)                                     |
| 25845 | dirMS_041712_NAR_60mM_minus.18127.18127.3  | 3 | 3.4  | 2 | 3.59E-04 | S702s    | (R)KSGK(K)I K G K A H F I F V L E G A G D (R)H    | p.Phosphorylated S                   | 162.35 | 649.328  | 1865.966 | 79.9912  | 12.8  | 8.6  | 19364.4  | 9.09  | HUMAN | P13497-6 | Isoform BMP1-7 of Bone morphogenetic protein 1         |
| 25846 | dirMS_041712_NAR_60mM_minus.6079.6079.3    | 3 | 3.4  | 1 | 2.29E-05 | Y2612    | (K)LEAEAK(K)E L E E S K A D A E V E (K)R          | m.Oxidized methionine                | 92.53  | 492.8981 | 1476.681 | -0.0015  | -1    | 4.14 | 31923.6  | 4.85  | HUMAN | B72596   | Tropomyosin alpha 1 chain                              |
| 25847 | dirMS_041712_NAR_60mM_minus.7239.7239.3    | 3 | 3.4  | 1 | 3.04E-05 | Y2612    | (RI)FEESST(R)I E L T E S T N A D D T (K)Q         | m.Oxidized methionine                | 98.72  | 542.9247 | 1626.761 | -0.0001  | -0.6  | 4.68 | 150022.8 | 9.14  | HUMAN | E7EWC0   | Uncoupler-inhibited myosin-V                           |
| 25848 | dirMS_041712_NAR_120mM_plus.2556.2556.3    | 3 | 3.4  | 0 | 3.96E-05 | Y2612    | (RI)LIIFMFR(L)I H F F P (P)A I P L T S (R)G       | m.Oxidized methionine                | 176.68 | 540.9492 | 1620.835 | -0.0025  | -1.5  | 9.75 | 42230.8  | 4.77  | HUMAN | AKN228   | Putative tubulin beta chain-like protein ENSP000029037 |
| 25849 | dirMS_041712_NAR_20mM_plus.17137.17137.3   | 3 | 3.4  | 0 | 1.02E-04 | Y2612    | (R)EGGSPV(R)I G G S V P L T T Q F A Q T (K)K      | m.Oxidized methionine                | 189.33 | 578.9671 | 1374.891 | -0.0041  | -2.4  | 4.53 | 53219.8  | 5.66  | HUMAN | Q5K6K4   | Cytosolic non-specific dipeptidase                     |
| 25850 | dirMS_041712_NAR_20mM_plus.8842.8842.3     | 3 | 3.4  | 0 | 1.37E-05 | T1921 M3 | (K)IQYF(N)I K G Q I V F N (N) M V L (K)K          | t.Nucleo[cytosine] (T)Form           | 130.65 | 530.6038 | 1370.714 | 219.0382 | 5.6   | 8.26 | 131822.8 | 7.28  | HUMAN | G16706   | Alpha-mannosidase 2                                    |
| 25851 | dirMS_041712_NAR_30mM_plus.19124.19124.2   | 2 | 3.4  | 0 | 1.18E-05 | Y2612    | (K)IYVSLA(K)I Y V I S L A P P (K)R                | m.Oxidized methionine                | 152.97 | 580.4939 | 1160.667 | -0.0049  | -4.2  | 6    | 20139.7  | 9.34  | HUMAN | C91753   | Aspartate-tRNA ligase, cytoplasmic (Fragment)          |
| 25852 | dirMS_041712_NAR_30mM_plus.20313.20313.2   | 2 | 3.4  | 2 | 1.76E-05 | T3891    | (R)IQDALS(R)I Q D A L S E T T G V G (D)D          | t.Phosphorylated T                   | 160.97 | 742.362  | 1403.76  | 79.5566  | -6.6  | 9.99 | 30230.5  | 9.74  | HUMAN | G3V248   | WD repeat-containing protein 25                        |
| 25853 | dirMS_041712_NAR_30mM_plus.4813.4813.2     | 2 | 3.4  | 0 | 8.11E-05 | Y2612    | (R)MGGDQ(R)I M G Q I Q T M E (R)K                 | m.Oxidized methionine                | 76.78  | 426.6906 | 832.37   | 0.0037   | 4.3   | 5.75 | 77799.7  | 6.09  | HUMAN | Q5K6K4   | Heterogeneous nuclear ribonucleoprotein M              |
| 25854 | dirMS_041712_NAR_30mM_plus.8623.8623.2     | 2 | 3.4  | 0 | 1.74E-05 | Y2612    | (RI)ELMNTA(R)I L N V L A T A (K)E                 | m.Oxidized methionine                | 96.63  | 430.2487 | 859.488  | 0.0018   | 2.1   | 6.1  | 21311.5  | 10.28 | HUMAN | 85MCP9   | 40S ribosomal protein S7                               |
| 25855 | dirMS_041712_NAR_40mM_plus.10061.10061.3   | 3 | 3.4  | 0 | 6.65E-04 | T781     | (RI)WTAAR(R)I W T A A P I P A P P S (R)V          | t.Phosphorylated T                   | 123.88 | 478.5511 | 1353.691 | 79.9478  | -12.9 | 9.75 | 9940.4   | 11.03 | HUMAN | B7W024   | B-cell CLL/lymphoma 7 protein family member B          |
| 25856 | dirMS_041712_NAR_40mM_plus.12221.12221.2   | 2 | 3.4  | 0 | 4.91E-04 | Y2612    | (RI)YELTLR(L)I Y L L T (R)S                       | m.Oxidized methionine                | 138    | 454.2649 | 907.525  | -0.0022  | -2.4  | 6    | 334221.3 | 6.44  | HUMAN | P19324   | Desmoplakin                                            |
| 25857 | dirMS_041712_NAR_40mM_plus.18036.18036.2   | 2 | 3.4  | 0 | 9.77E-04 | M159m    | (R)IYVSLA(K)I Y V I S L A P P (K)R                | m.Oxidized methionine                | 117.8  | 611.2437 | 1813.88  | -0.002   | -4.6  | 6    | 20139.7  | 9.34  | HUMAN | C91753   | Aspartate-tRNA ligase, cytoplasmic (Fragment)          |
| 25858 | dirMS_041712_NAR_50mM_plus.12711.12711.2   | 2 | 3.4  | 0 | 2.97E-05 | Y2612    | (R)IYPLTR(R)I Y P L T R L P G L L S T (R)E        | m.Oxidized methionine                | 158.08 | 490.2879 | 1468.863 | -0.0143  | -9.7  | 9.64 | 21157.6  | 9.92  | HUMAN | Q28028   | SET and MYND domain containing 3                       |
| 25859 | dirMS_041712_NAR_50mM_plus.2798.7998.3     | 3 | 3.4  | 0 | 8.23E-03 | Y2612    | (K)NLELHA(K)I N L E H I T S S A V S (K)K          | k.Ligase (K)                         | 108.8  | 490.5973 | 1469.796 | -0.0185  | -12.6 | 6.75 | 92504.1  | 5.32  | HUMAN | Q9CKQ1   | Vacuolar protein sorting-associated protein 35         |
| 25860 | dirMS_041712_NAR_60mM_plus.16409.16409.3   | 3 | 3.4  | 0 | 6.30E-05 | Y2612    | (RI)ETHSAL(R)I T H S A L G L Q V F A R (K)I       | m.Oxidized methionine                | 142.15 | 514.2744 | 1540.812 | -0.0032  | -2.1  | 6.85 | 141616.6 | 6.14  | HUMAN | B72M48   | Protein transport protein Sec24B                       |
| 25861 | dirMS_041712_NAR_60mM_plus.15041.15041.3   | 3 | 3.4  | 1 | 5.17E-05 | Y79H     | (R)STAGDQ(R)I S T A G D Q T L E V V (K)R          | k.Ligase (K)                         | 151.01 | 514.9322 | 1418.769 | 10.0031  | -5.8  | 5.8  | 19529.2  | 6.06  | HUMAN | HY0261   | Arabinoside and spacing factor 1 (Fragment)            |
| 25862 | dirMS_041712_NAR_60mM_plus.4743.4743.3     | 3 | 3.4  | 0 | 6.64E-04 | Y2612    | (R)KAEEDD(R)I K A E E D D E A D P K (R)K          | m.Oxidized methionine                | 78.85  | 453.872  | 1359.603 | -0.0008  | -0.6  | 4.08 | 11529.7  | 4.14  | HUMAN | F02682   | Arabinoside                                            |
| 25863 | dirMS_041712_NAR_120mM_minus.11111.11111.3 | 3 | 3.39 | 0 | 6.08E-05 | Y2612    | (R)SNRPAR(K)I S N R P A F V M P S F G (K)K        | m.Oxidized methionine                | 113.93 | 478.5776 | 1433.721 | -0.0023  | -1.6  | 7.05 | 104488.6 | 5.36  | HUMAN | B2RC55   | Actinin, alpha 2, isoform CRA_b                        |
| 25864 | dirMS_041712_NAR_120mM_minus.12823.12823.3 | 3 | 3.39 | 0 | 2.84E-05 | M251m    | (K)ITFMSA(K)I T F M S A V G H (R)K                | m.Oxidized methionine                | 122.98 | 464.8871 | 1376.653 | 15.9939  | -0.7  | 8.47 | 46199.4  | 9.14  | HUMAN | Q5V816   | F-box only protein 18                                  |
| 25865 | dirMS_041712_NAR_120mM_minus.5762.5762.2   | 2 | 3.39 | 1 | 3.11E-05 | T64k1    | (R)IKFKIES(R)I F K I E S V A S R (L)R             | t.Phosphorylated T                   | 85.25  | 463.5889 | 1308.679 | 79.9827  | 11.8  | 4.78 | 98854    | 5.17  | HUMAN | B4D174   | DNA ligase                                             |
| 25866 | dirMS_041712_NAR_20mM_minus.13218.13218.3  | 3 | 3.39 | 0 | 7.44E-04 | Y2612    | (R)IGNPTV(R)I G N P T V E I D F T S (K)G          | m.Oxidized methionine                | 183.13 | 465.574  | 1408.716 | -0.0045  | -3.2  | 4.37 | 10177.6  | 6.05  | HUMAN | Q7E409   | Alpha-macrose (Fragment)                               |
| 25867 | dirMS_041712_NAR_20mM_minus.9047.9047.2    | 2 | 3.39 | 0 | 1.50E-05 | K509K    | (K)ISTFALE(R)I S F A L E L Q (K)K                 | k.Ligase (K)                         | 140.22 | 589.304  | 1063.578 | 114.0333 | -8.2  | 6    | 106708.1 | 6.11  | HUMAN | Q6NK52   | ARHGEF1 protein                                        |
| 25868 | dirMS_041712_NAR_30mM_minus.5795.5795.2    | 2 | 3.39 | 0 | 6.55E-04 | Y2612    | (K)ISTETSLC(K)I S T E T S L C A Q G (K)A          | m.Oxidized methionine                | 85.58  | 575.2877 | 1149.575 | -0.0055  | -5.6  | 5.66 | 25978.5  | 4.91  | HUMAN | CS1502   | Prostate leucine zipper variant 2                      |
| 25869 | dirMS_041712_NAR_40mM_minus.12878.12878.3  | 3 | 3.39 | 1 | 8.25E-03 | Y2612    | (R)LDVEA(R)I D V D Q E V A E V D K N I E L L (K)K | m.Oxidized methionine                | 159.83 | 619.3351 | 1850.001 | -0.0144  | -5.6  | 4.18 | 41088.1  | 5.18  | HUMAN | FSH442   | Tumor susceptibility gene 101 protein                  |
| 25870 | dirMS_041712_NAR_40mM_minus.6662.6662.3    | 3 | 3.39 | 0 | 3.88E-03 | Y2612    | (R)KSLAAR(R)I K S L A A R A P T (R)K              | m.Oxidized methionine                | 107.8  | 482.6107 | 1299.399 | -0.0067  | -0.7  | 8.71 | 101498.1 | 6.07  | HUMAN | Q5K6K4   | Heterogeneous nuclear ribonucleoprotein M              |
| 25871 | dirMS_041712_NAR_50mM_minus.15117.15117.3  | 3 | 3.39 | 1 | 1.19E-05 | Y2612    | (R)LIIPPPV(K)I L I P P P V A L A G L Z (R)R       | m.Oxidized methionine                | 153.45 | 489.617  | 1466.848 | -0.0114  | -7.7  | 8.75 | 29153.1  | 7.44  | HUMAN | Q29216   | Translational activator GCN1                           |
| 25872 | dirMS_041712_NAR_50mM_minus.6850.6850.3    | 3 | 3.39 | 0 | 8.00E-03 | M233m    | (K)S2AAM(K)I S A A M L G N S E D H T A L S (R)S   | m.Oxidized methionine                | 105.48 | 559.0253 | 1659.776 | 15.9878  | -4.2  | 5.3  | 46211    | 6.76  | HUMAN | B4DEK4   | Sorting nexin-2                                        |
| 25873 | dirMS_041712_NAR_50mM_minus.7968.7968.3    | 3 | 3.39 | 0 | 4.48E-03 | M172m    | (R)HNVQ(R)I H V Q V H V L S F C G I S (S)S        | C.Carbon/nitrogen methylation m.Oxid | 112.05 | 544.9272 | 1616.777 | 15.99    | -3    | 5.38 | 87447.6  | 6.44  | HUMAN | Q15347   | Protein transport protein Sec23B                       |
| 25874 | dirMS_041712_NAR_50mM_minus.14205.14205.2  | 2 | 3.39 | 1 | 1.05E-05 | S984s    | (K)FCSNAR(K)I F C S N A R N L D P D A L I (R)W    | C.Carbon/nitrogen methylation t.NuAc | 138.38 | 518.9231 | 1315.766 | 203.0791 | -0.2  | 4.55 | 23483.8  | 5.6   |       |          |                                                        |

|       |                                            |   |      |                  |                                                  |                            |        |          |          |          |         |      |          |             |            |                                                                             |                                 |
|-------|--------------------------------------------|---|------|------------------|--------------------------------------------------|----------------------------|--------|----------|----------|----------|---------|------|----------|-------------|------------|-----------------------------------------------------------------------------|---------------------------------|
| 25938 | dirMS_041712_NAR_20mM_minus.11215.11215.2  | 2 | 3.37 | 0.606E-04        | (RLIVLPAS)(RL)V/V/P/A/S/Q/C/S/L I G V(G)         | C.Carbonmethylation        | 159.67 | 714.8954 | 1428.788 | -0.004   | -1.1    | 8.75 | 32621    | 8.75 HUMAN  | B4DLDL     | Poly(C)-binding protein 2                                                   |                                 |
| 25939 | dirMS_041712_NAR_20mM_minus.7459.7459.3    | 3 | 3.37 | 0.540E-05 M239M  | (RISGATY)(K)E V/Q/E/Q(m) L N/V(Q) NK(I)          | m.Oxidant methione         | 123.17 | 448.2327 | 1446.689 | 15.942   | -0.5    | 4.4  | 40069.4  | 4.83 HUMAN  | EF7WR1     | Tubulin beta chain                                                          |                                 |
| 25940 | dirMS_041712_NAR_20mM_minus.1515.1515.3    | 3 | 3.37 | 1.162E-05        | (RIEESPAR)(R)E I/E/D/P/A/V/E                     | m.Oxidant methione         | 148.75 | 541.7861 | 1029.818 | -0.018   | -1.6    | 4.37 | 23767.8  | 9.96 HUMAN  | Q08W72     | Echoderm microtubule-associated protein-like 2 (Fragment)                   |                                 |
| 25941 | dirMS_041712_NAR_30mM_minus.16901.16901.2  | 2 | 3.37 | 1.120E-05        | (KINPSAAR)(R)N P/S/A/F/C/V/A                     | m.Oxidant methione         | 145.23 | 620.3013 | 1239.594 | 0.014    | -1.1    | 9.75 | 18626.5  | 5.64 HUMAN  | B8R2ZC     | Guanine-glutamyltransferase                                                 |                                 |
| 25942 | dirMS_041712_NAR_30mM_minus.6969.6969.2    | 2 | 3.37 | 0.147E-05        | (KJSTVSS)(K)S/V/T/V/S S/K(E)                     | m.Oxidant methione         | 92.48  | 10.4705  | 820.477  | -0.0037  | -4.6    | 8.75 | 13286.2  | 9.99 HUMAN  | HY0LAZ     | Signal recognition particle 14 kDa protein                                  |                                 |
| 25943 | dirMS_041712_NAR_30mM_minus.7568.7568.2    | 2 | 3.37 | 1.128E-05        | (RISMSDQD)(R)M/R/D/Q/I(NK)                       | m.Oxidant methione         | 95.32  | 430.7394 | 860.458  | 0.0071   | -8.2    | 8.6  | 49327.1  | 9.11 HUMAN  | Q08B91     | Probable UDP-sugar transporter protein SLC35A5                              |                                 |
| 25944 | dirMS_041712_NAR_40mM_minus.11525.11525.3  | 3 | 3.37 | 1.939E-05        | (RISGATY)(R)E C/A/T/V/F A/V/A/E L H H T R(F)     | m.Oxidant methione         | 160.05 | 257.2545 | 1370.045 | -0.005   | 1.8     | 6.8  | 24807.9  | 9.96 HUMAN  | Q08W72     | Subunit of zinc transporter 10                                              |                                 |
| 25945 | dirMS_041712_NAR_40mM_minus.9358.9358.3    | 3 | 3.37 | 1.247E-05        | (KIDIFWEY)(K)D/F Y/L/V/E/Q/K E/Y/E/N(K)          | m.Oxidant methione         | 136.73 | 611.627  | 1832.87  | -0.0037  | -2      | 4.41 | 44573    | 5.28 HUMAN  | Q08H14     | Phosphorylated adapter RNA export protein                                   |                                 |
| 25946 | dirMS_041712_NAR_50mM_minus.8505.8505.3    | 3 | 3.37 | 0.132E-05        | (RIYVAELV)(R)V A/E F/Y/V/G/E/G/L A(L)C           | m.Oxidant methione         | 115.58 | 496.9372 | 1488.806 | -0.0086  | -5.8    | 4.25 | 294266.7 | 7.12 HUMAN  | OY5417     | DNA polymerase theta                                                        |                                 |
| 25947 | dirMS_041712_NAR_60mM_minus.13013.13013.3  | 3 | 3.37 | 0.659E-05        | (KIDGHPTE)(K)G H/P/T/V/S S/F O(K)                | m.Oxidant methione         | 137.27 | 486.2642 | 1456.778 | -0.0014  | -1      | 6.75 | 52843.5  | 6.15 HUMAN  | B729L0     | T-complex protein 1 subunit delta                                           |                                 |
| 25948 | dirMS_041712_NAR_60mM_minus.14142.14142.3  | 3 | 3.37 | 0.354E-05        | (KIDGCTAK)(K)C G/A/T/V/V/V/LG/H S/E/R(N)         | m.Oxidant methione         | 138.02 | 529.5838 | 1586.738 | -0.0012  | -4.7    | 5.32 | 31075.7  | 5.67 HUMAN  | P00174     | Triphosphate isomerase                                                      |                                 |
| 25949 | dirMS_041712_NAR_60mM_minus.18362.18362.2  | 2 | 3.37 | 0.190E-05 M1935M | (KIDGATFN)(R)E H/P/D/V/S S/V/T/S R(S)            | m.Oxidant methione         | 160.05 | 818.9159 | 1620.833 | -0.018   | -2.5    | 9.75 | 42238.8  | 4.77 HUMAN  | Q02924     | Putative tubulin beta chain-like protein ENSP00002290377                    |                                 |
| 25950 | dirMS_041712_NAR_60mM_minus.19665.19665.3  | 3 | 3.37 | 0.331E-05        | (KJLALEVA)(K)A V/E/L/S/L/S D/L G A(R)Y           | m.Oxidant methione         | 176.95 | 529.6145 | 1588.838 | -0.0095  | -6      | 4.03 | 24286.7  | 4.89 HUMAN  | G3V4N7     | Creatine kinase B-type (Fragment)                                           |                                 |
| 25951 | dirMS_041712_NAR_60mM_minus.7629.7629.3    | 3 | 3.37 | 1.655E-05        | (RIYLAEVA)(R)Y L/A/E V/A/A/G D/L G A(R)Y         | m.Oxidant methione         | 102.07 | 427.222  | 1279.653 | -0.0014  | -1.1    | 4.56 | 19186.1  | 4.48 HUMAN  | BD0A26     | 14-3-3 protein zeta/delta                                                   |                                 |
| 25952 | dirMS_041712_NAR_120mM_plus.6334.6334.2    | 2 | 3.37 | 1.284E-05        | (RISADGE)(R)S I/A/K/E/G F E(K)                   | m.Oxidant methione         | 87.12  | 504.7715 | 1008.536 | -0.0003  | -2.3    | 5.86 | 17313.7  | 10.05 HUMAN | B72712     | 60 kDa heat shock protein, mitochondrial                                    |                                 |
| 25953 | dirMS_041712_NAR_20mM_plus.12437.12437.3   | 3 | 3.37 | 0.548E-05 M213M  | (RIVGAGS)(R)G A I G S/A G M S/H/C W(R)S          | C.Carbonmethylation-m.Oxid | 158.63 | 503.2262 | 1488.684 | 15.912   | -9.1    | 9.73 | 72781    | 5.35 HUMAN  | HT5737     | Protein Clorf52 (Fragment)                                                  |                                 |
| 25954 | dirMS_041712_NAR_20mM_plus.12616.12616.2   | 2 | 3.37 | 0.233E-05        | (RIDGPLLA)(R)D G P L/L A/L(A)N(K)                | m.Oxidant methione         | 159.18 | 449.2728 | 897.54   | -0.0021  | -2.3    | 5.84 | 63899.7  | 5.46 HUMAN  | Q08U22     | Midsian                                                                     |                                 |
| 25955 | dirMS_041712_NAR_20mM_plus.14050.14050.2   | 2 | 3.37 | 1.746E-04 K1185X | (RISEFAEP)(R)S F I E E A/P A R(L)K               | k.IgTqubac.t               | 168.57 | 631.3387 | 1147.611 | 114.0595 | 13.2    | 5.87 | 482399.6 | 5.8 HUMAN   | HY07V4     | Dynein heavy chain 8, axonemal                                              |                                 |
| 25956 | dirMS_041712_NAR_20mM_plus.8143.8143.2     | 2 | 3.37 | 0.546E-04        | (KJADLEP)(K)Q/L/I/E/P V S A P A(K)               | m.Oxidant methione         | 126.35 | 555.8092 | 1110.615 | -0.0042  | -3.8    | 6.05 | 53377.8  | 5.74 HUMAN  | Q15149     | Plectin                                                                     |                                 |
| 25957 | dirMS_041712_NAR_20mM_plus.8809.8809.2     | 2 | 3.37 | 0.132E-04 F48I   | (KIVNDEP)(R)P F/G/S/E/A G E/K(L)                 | m.Oxidant methione         | 95     | 498.2392 | 995.483  | -0.011   | -11.6   | 8.26 | 8194.7   | 6.61 HUMAN  | Q08W72     | Microtubule-associated protein tau                                          |                                 |
| 25958 | dirMS_041712_NAR_30mM_plus2.13040.13040.2  | 2 | 3.37 | 0.568E-05        | (KJNVAAM)(K)N Q/L/A/N/T L(R)M                    | m.Oxidant methione         | 121.65 | 481.2676 | 961.521  | 0.0065   | 6.8     | 9.75 | 21266.1  | 7.91 HUMAN  | Q718R1     | Charged multivesicular body protein 1b                                      |                                 |
| 25959 | dirMS_041712_NAR_30mM_plus2.6893.6893.2    | 2 | 3.37 | 0.276E-05        | (KJAEYLRC)(K)A E/Y/L/V/L(R)I                     | C.Carbonmethylation        | 90.83  | 406.1945 | 811.377  | 0.005    | 6.2     | 6.04 | 52378.2  | 6.32 HUMAN  | C9ZCE4     | 26S proteasome non-ATPase regulatory subunit 6                              |                                 |
| 25960 | dirMS_041712_NAR_40mM_plus2.12465.12465.2  | 2 | 3.37 | 0.103E-05        | (RIVLDAL)(R)M L/Q/A/L/E/L G(L)K                  | m.Oxidant methione         | 138.83 | 485.8002 | 970.593  | 0        | 0       | 5.97 | 16060.2  | 10.31 HUMAN | P39019     | 40S ribosomal protein S19                                                   |                                 |
| 25961 | dirMS_041712_NAR_40mM_plus2.15091.15091.3  | 3 | 3.37 | 1.135E-05        | (RIVGPEP)(R)P F/G/S/E/A D Q/G P A I G(R)W(R)Y    | m.Oxidant methione         | 147.8  | 558.9886 | 1674.929 | 0.0277   | 13.5    | 6.07 | 66971    | 7.42 HUMAN  | Q08W72     | Alpha-1,6-fucosyltransferase                                                |                                 |
| 25962 | dirMS_041712_NAR_40mM_plus2.6141.6141.2    | 2 | 3.37 | 1.140E-04        | (RITGSGAS)(R)T G/S/E/A G E/K(L)                  | m.Oxidant methione         | 95     | 498.2392 | 995.483  | -0.011   | -11.6   | 8.26 | 8194.7   | 6.61 HUMAN  | Q08W72     | Microtubule-associated protein tau                                          |                                 |
| 25963 | dirMS_041712_NAR_40mM_plus2.7948.7948.2    | 2 | 3.37 | 0.143E-05        | (RIELNMTA)(R)N L/N/T/A/K(E)                      | m.Oxidant methione         | 106.88 | 430.2474 | 859.488  | -0.0008  | -1      | 6.1  | 21311.5  | 10.28 HUMAN | B5MCP9     | 40S ribosomal protein 57                                                    |                                 |
| 25964 | dirMS_041712_NAR_40mM_plus2.9283.9283.2    | 2 | 3.37 | 1.698E-05        | (KJXELSPR)(K)E L/S/L/P/R                         | m.Oxidant methione         | 117.95 | 421.7572 | 842.509  | -0.0027  | -2.7    | 8.75 | 7665.7   | 10.89 HUMAN | H7C146     | Microtubule-associated serine/threonine-protein kinase 4 (Fragment)         |                                 |
| 25965 | dirMS_041712_NAR_50mM_plus2.12869.12869.3  | 3 | 3.37 | 2.151E-06        | (KIDGAVGR)(R)K A/V/G P S A I G V E D(K)          | m.Oxidant methione         | 146.55 | 547.6436 | 1640.922 | -0.0055  | -3.4    | 6.18 | 37860.2  | 10.33 HUMAN | Q09218     | Zinc finger RING-domain-containing protein 2                                |                                 |
| 25966 | dirMS_041712_NAR_50mM_plus2.15261.15261.3  | 3 | 3.37 | 0.344E-05        | (KIDGATFN)(R)E H/P/D/V/S S/V/T/S R(S)            | m.Oxidant methione         | 160.05 | 818.9159 | 1620.833 | -0.018   | -2.5    | 9.75 | 42238.8  | 4.77 HUMAN  | Q02924     | Putative tubulin beta chain-like protein ENSP00002290377                    |                                 |
| 25967 | dirMS_041712_NAR_50mM_plus2.6169.6169.2    | 2 | 3.37 | 0.161E-04        | (KIDVCTAK)(K)M/D I C T A H S D C V S/A D G A(R)Y | C.Carbonmethylation        | 96.33  | 587.9217 | 1161.764 | 0.0025   | -1.4    | 5.21 | 42053.3  | 5.58 HUMAN  | Q08W70     | TNDC5 protein                                                               |                                 |
| 25968 | dirMS_041712_NAR_50mM_plus2.8410.8410.3    | 3 | 3.37 | 2.568E-04        | (KIHQDMQI)(K)H D Q M T V/I/O K X K(R)            | m.Oxidant methione         | 110.75 | 504.9436 | 1512.82  | -0.004   | -2.7    | 8.51 | 4097.8   | 9.78 HUMAN  | H3BQR9     | Adenosine deaminase-like protein                                            |                                 |
| 25969 | dirMS_041712_NAR_50mM_plus2.9402.9402.3    | 3 | 3.37 | 0.581E-04        | (RIYPMQD)(R)M P/P/N P A H I A T(K)               | m.Oxidant methione         | 116.63 | 471.5817 | 1412.736 | -0.0049  | -3.5    | 8.6  | 47279.6  | 4.92 HUMAN  | E9PSC2     | Histone-binding protein RBBP7                                               |                                 |
| 25970 | dirMS_041712_NAR_50mM_plus2.1377.1377.3    | 3 | 3.37 | 2.545E-04        | (KIDGATFN)(R)E H/P/D/V/S S/V/T/S R(S)            | m.Oxidant methione         | 160.05 | 818.9159 | 1620.833 | -0.018   | -2.5    | 9.75 | 42238.8  | 4.77 HUMAN  | Q02924     | Putative tubulin beta chain-like protein ENSP00002290377                    |                                 |
| 25971 | dirMS_041712_NAR_60mM_plus.16016.16018.3   | 3 | 3.37 | 1.112E-06        | (KIDTFLNK)(K)T D E L T V/L/M/G(K)                | m.Oxidant methione         | 141.08 | 406.508  | 1218.713 | -0.0032  | -2.6    | 8.26 | 11504.1  | 9.57 HUMAN  | K7E444     | Protein L isoform CRA_3                                                     |                                 |
| 25972 | dirMS_041712_NAR_60mM_plus.20581.20581.3   | 3 | 3.37 | 1.202E-05        | (KJRSLEAY)(K)R S/L E Y F A V/Q/P/R S S E(K)      | m.Oxidant methione         | 168    | 655.6825 | 1965.019 | 0.0141   | 7.2     | 8.59 | 42981.8  | 9.5 HUMAN   | Q01851     | POU domain, class 4, transcription factor 1                                 |                                 |
| 25973 | dirMS_041712_NAR_60mM_plus.5377.5377.3     | 3 | 3.37 | 0.349E-05 M21m   | (KJSDGMR)(R)S G/S M P/S G A/H P/S/V(L)K          | m.Oxidant methione         | 86.2   | 467.5464 | 1384.627 | 15.9373  | 1.7     | 6.46 | 48340.6  | 8.84 HUMAN  | Q07666     | KH domain-containing, RNA-binding, signal transduction-associated protein 1 |                                 |
| 25974 | dirMS_041712_NAR_120mM_minus.12225.12225.4 | 4 | 3.36 | 1.384E-05 M155M  | (KIDGFLDR)(R)D L/L/L V/E N M/K/L A(L)K           | m.Oxidant methione-DNA-bk  | 120.6  | 446.7524 | 1271.684 | 13.0277  | 5.7     | 8.59 | 19285.1  | 7.92 HUMAN  | Q08W70     | Anterior gradient protein 3 homolog                                         |                                 |
| 25975 | dirMS_041712_NAR_120mM_minus.4469.4469.2   | 2 | 3.37 | 1.137E-05 K52K   | (RIEMENRE)(R)M D/V/E/P/S S M S V S(R)            | k.IgTqubac.t               | 73.37  | 456.2146 | 1701.774 | 114.0294 | 10.7    | 4.18 | 42918.8  | 5.18 HUMAN  | Q04768     | Serine/threonine-protein kinase 178                                         |                                 |
| 25976 | dirMS_041712_NAR_30mM_minus.14352.14352.2  | 2 | 3.36 | 0.506E-05        | (RISDFGFR)(R)E E/D/F/N/L(R)E                     | m.Oxidant methione         | 130.87 | 503.7677 | 1006.532 | -0.0035  | -3.5    | 5.72 | 82516.1  | 5.49 HUMAN  | H07384     | Calpain-1 catalytic subunit                                                 |                                 |
| 25977 | dirMS_041712_NAR_30mM_minus.6550.6550.2    | 2 | 3.36 | 0.190E-05        | (KJIEVGGK)(K)E V/E/G G R(K)                      | m.Oxidant methione         | 90.53  | 408.72   | 816.421  | 0.0117   | 14.4    | 4.53 | 21311.5  | 10.28 HUMAN | B5MCP9     | 40S ribosomal protein 57                                                    |                                 |
| 25978 | dirMS_041712_NAR_40mM_minus.13361.13361.3  | 3 | 3.36 | 0.395E-05 S413S  | (KJGPPGFR)(R)F P F G S/G G G G Q Q/R(A)          | s.N-acylglycosaminic(S)    | 162.57 | 493.5664 | 1275.583 | 203.9992 | 13.4    | 9.75 | 53724.2  | 9.54 HUMAN  | H38P87     | RNA-binding protein HUS                                                     |                                 |
| 25979 | dirMS_041712_NAR_40mM_minus.8662.8662.3    | 3 | 3.36 | 1.021E-05        | (KIDGATFN)(R)E H/P/D/V/S S/V/T/S R(S)            | m.Oxidant methione         | 160.05 | 818.9159 | 1620.833 | -0.018   | -2.5    | 9.75 | 42238.8  | 4.77 HUMAN  | Q02924     | Putative tubulin beta chain-like protein ENSP00002290377                    |                                 |
| 25980 | dirMS_041712_NAR_40mM_minus.9347.9347.3    | 3 | 3.36 | 1.188E-04 S11S   | (JGGEPSFR)(J)M G P S P G R G A(K)                | C.Carbonmethylation-LN-acy | 122.27 | 530.5989 | 1386.679 | 203.1027 | 14.7    | 8.75 | 18627.7  | 11.08 HUMAN | HY023      | Paired mesoderm homeobox protein 2 (Fragment)                               |                                 |
| 25981 | dirMS_041712_NAR_60mM_minus.11514.11514.3  | 3 | 3.36 | 0.932E-04 M974M  | (RIEYSSLV)(R)E Y V S S L V/L M A(K)E             | m.Oxidant methione         | 123.83 | 445.9007 | 1319.688 | 16       | 13.8    | 4.53 | 51242.6  | 5.52 HUMAN  | H7K91      | Dynein heavy chain 17, axonemal                                             |                                 |
| 25982 | dirMS_041712_NAR_60mM_minus.12627.12627.2  | 2 | 3.36 | 0.480E-05        | (RIILAMP)(R)A L M/P P N A H I A T(K)             | C.Carbonmethylation        | 130.53 | 737.8855 | 1474.744 | 0.0197   | 13.4    | 6    | 45536.8  | 9.03 HUMAN  | B72K42     | HBS1-like protein                                                           |                                 |
| 25983 | dirMS_041712_NAR_60mM_minus.1831.1831.3    | 3 | 3.36 | 1.108E-05        | (RISDAURE)(R)M R/E D AVN(L) T P(K)               | m.Oxidant methione         | 157.92 | 512.9419 | 1536.809 | -0.0021  | 1.4     | 4.68 | 8793.3   | 6.08 HUMAN  | P26038     | Myosin                                                                      |                                 |
| 25984 | dirMS_041712_NAR_60mM_minus.9806.9806.3    | 3 | 3.36 | 1.283E-05        | (RIYTNME)(R)T/N/L A/E N E V/T I K(D)             | m.Oxidant methione         | 33.6   | 114.3    | 465.2487 | 1393.732 | -0.0006 | -4.0 | 5.81     | 66208.7     | 8.32 HUMAN | PD0264                                                                      | Keratin, type II cytoskeletal 1 |
| 25985 | dirMS_041712_NAR_120mM_plus.13598.13598.3  | 3 | 3.36 | 1.133E-05        | (KJYEMFA)(R)K Y E/M F/A Q/T/I/Q/G Q(S)G          | m.Oxidant methione         | 124.65 | 543.9369 | 1629.805 | -0.0092  | -5.6    | 8.59 | 9004.9   | 5.14 HUMAN  | P55072     | Transitional endoplasmic reticulum ATPase                                   |                                 |
| 25986 | dirMS_041712_NAR_120mM_plus.15615.15615.4  | 4 | 3.36 | 2.733E-05        | (KJRTVGV)(R)K T/V/E P/A A D G K V V V V K(R)     | m.Oxidant methione         | 135.43 | 467.2783 | 1866.106 | -0.0145  | -7.8    | 8.5  | 7945.1   | 11.03 HUMAN | CJ850      | 60S ribosomal protein L28                                                   |                                 |
| 25987 | dirMS_041712_NAR_120mM_plus.4427.4427.3    | 3 | 3.36 | 1.308E-05        | (KJGADGE)(K)G I/A/D/E/R A T R(L)                 | m.Oxidant methione         | 71.55  | 425.889  | 1275.592 | 0.0051   | 1.0     | 4.41 | 57024.9  | 6.01 HUMAN  | G5W6V6     | T-complex protein 1 subunit beta                                            |                                 |
| 25988 | dirMS_041712_NAR_120mM_plus.6853.6853.3    | 3 |      |                  |                                                  |                            |        |          |          |          |         |      |          |             |            |                                                                             |                                 |

|       |                                          |   |      |   |                   |                                                    |        |           |           |          |       |         |            |             |                                                    |                                                                |
|-------|------------------------------------------|---|------|---|-------------------|----------------------------------------------------|--------|-----------|-----------|----------|-------|---------|------------|-------------|----------------------------------------------------|----------------------------------------------------------------|
| 26047 | drMs_041712_NAR_120mM_minus.5723.5723.2  | 2 | 3.34 | 1 | 9.25E-04          | (RIDRGGD)(RID)D G Q H S W V P R(G)                 | 84.4   | 67.828296 | 1352.645  | 0.0065   | 4.8   | 6.75    | 73400.1    | 10.54 HUMAN | Q99501                                             | GA52-like protein 1                                            |
| 26048 | drMs_041712_NAR_120mM_minus.5939.5939.3  | 3 | 3.34 | 1 | 1.98E-05 M1m      | (-j)MPARH(E)jHP A H R P/D P Q V R(G)               | 86.45  | 511.2386  | 1155.723  | 15.779   | -1.1  | 6.69    | 48937.1    | 11.92 HUMAN | FSH450                                             | Frizled-10                                                     |
| 26049 | drMs_041712_NAR_30mM_minus.10771.10771.2 | 3 | 3.34 | 1 | 3.18E-05 F35T     | (K)MREVE(L)E L L P S G D V I E C N R(K)            | 119.43 | 577.9535  | 1731.262  | -0.0169  | -4.4  | 4.14    | 48236.2    | 9.1 HUMAN   | Q9U199                                             | Xc-repair protein 6 (Fragment)                                 |
| 26050 | drMs_041712_NAR_30mM_minus.21636.1636.2  | 2 | 3.34 | 0 | 1.29E-04          | (K)G T M T Q G S S P I G V L V R(S)                | 145.57 | 595.8008  | 1118.587  | 0.0069   | 6.2   | 4.53    | 533778     | 5.74 HUMAN  | Q11549                                             | Plectin                                                        |
| 26051 | drMs_041712_NAR_30mM_minus.5173.5713.2   | 2 | 3.34 | 0 | 1.31E-05          | (K)I V H S P I G H V P S G V E K(E)                | 85.4   | 445.7185  | 890.437   | -0.0069  | -7.8  | 6.72    | 47152.3    | 9.23 HUMAN  | B4D20U                                             | Serine/threonine protein kinase Nek2c                          |
| 26052 | drMs_041712_NAR_50mM_minus.15531.15531.3 | 3 | 3.34 | 0 | 2.72E-05 M118m    | (R)IAGKPV(R)G A K P V C I A(T)Q/U/L/E/S M I K(I)   | 155.9  | 631.6612  | 1876.969  | 15.9997  | -2.5  | 8.64    | 18466.1    | 9.78 HUMAN  | H3830U                                             | Pyruvate kinase (Fragment)                                     |
| 26053 | drMs_041712_NAR_30mM_minus.2662.2662.3   | 3 | 3.34 | 0 | 3.97E-04          | (C)KILPUSP(L)E L L L P S G D V I E C N R(K)        | 119.43 | 577.9535  | 1731.262  | -0.0169  | -4.4  | 4.14    | 48236.2    | 9.1 HUMAN   | Q9U199                                             | Xc-repair protein 6 (Fragment)                                 |
| 26054 | drMs_041712_NAR_60mM_minus.11036.11036.3 | 3 | 3.34 | 0 | 2.33E-05          | (R)IDAQQS(R)D A Q Q S S P A A D N R(E)             | 121.02 | 487.236   | 1459.677  | 0.0163   | 11.1  | 4.21    | 62343.6    | 5.47 HUMAN  | 6Z7PPO                                             | Ubiquitin conjugation factor EA 4                              |
| 26055 | drMs_041712_NAR_60mM_minus.13944.13944.3 | 3 | 3.34 | 0 | 1.94E-05          | (K)JADFCH(K)A D C F C I V A S R(E)                 | 137.33 | 432.2132  | 1294.625  | 0.0002   | 0.1   | 6.79    | 23493.8    | 5.45 HUMAN  | F8V1L3                                             | Mysin-10                                                       |
| 26056 | drMs_041712_NAR_60mM_minus.8398.8398.3   | 3 | 3.34 | 1 | 3.90E-05 K87zk    | (R)ITVCEQ(R)T V E C R D P V S Q A S A T C N K(A)   | 107.05 | 665.636   | 1880.821  | 114.0709 | 1.4   | 5.74    | 98740.7    | 5.79 HUMAN  | Q9UP79                                             | A disintegrin and metalloprotease with thrombospondin motifs 8 |
| 26057 | drMs_041712_NAR_120mM_plus.6883.6883.3   | 3 | 3.34 | 1 | 6.23E-04 S4Zs     | (R)ITLSTES(R)T L E T S T R Y P(S)                  | 90.72  | 412.8549  | 1156.584  | 79.9567  | -0.5  | 5.72    | 6148.1     | 9.3 HUMAN   | H30T84                                             | Uncharacterized protein                                        |
| 26058 | drMs_041712_NAR_120mM_plus.8591.811.2    | 2 | 3.34 | 0 | 6.90E-05          | (C)HPTALV(R)E L L L P S G D V I E C N R(K)         | 119.43 | 577.9535  | 1731.262  | -0.0169  | -4.4  | 4.14    | 48236.2    | 9.1 HUMAN   | Q9U199                                             | Xc-repair protein 6 (Fragment)                                 |
| 26059 | drMs_041712_NAR_20mM_plus.14183.14183.2  | 2 | 3.34 | 1 | 2.39E-03 S309s    | (K)ILGKKK(K)I(L)G V K G D(-)                       | 169.48 | 488.7934  | 773.488   | 203.0916 | 12.5  | 10      | 35385.2    | 7.88 HUMAN  | Q8N6P9                                             | Olfactory receptor 5AR1                                        |
| 26060 | drMs_041712_NAR_20mM_plus.18300.18300.2  | 2 | 3.34 | 0 | 4.35E-04          | (R)IGLLGFR(R)I L L F V P G T G K(S)                | 159.1  | 578.8387  | 1156.672  | -0.0023  | -2    | 8.75    | 32617.4    | 7.2 HUMAN   | 13L41                                              | Uncharacterized protein (Fragment)                             |
| 26061 | drMs_041712_NAR_30mM_plus.18852.18852.3  | 3 | 3.34 | 2 | 7.06E-04          | (K)MNTFM(K)K T F F E S L I D I K(N)                | 120.58 | 533.9719  | 1599.882  | 0.0197   | 12.3  | 8.25    | 282124     | 6.12 HUMAN  | Q2Z778                                             | Interferon-induced very large GTPase 1                         |
| 26062 | drMs_041712_NAR_30mM_plus.10282.10282.2  | 2 | 3.34 | 0 | 2.31E-05          | (R)ILNDGL(R)N Q L D Q L D A V S Y K(E)             | 107.4  | 615.8128  | 1728.632  | -0.0017  | -1.4  | 4.21    | 20235.4    | 6.77 HUMAN  | 69P4A9                                             | Caspr-1 (Fragment)                                             |
| 26063 | drMs_041712_NAR_30mM_plus.13408.13408.2  | 2 | 3.34 | 0 | 8.79E-05          | (K)NSVLN(K)S I G V L M V M K(C)                    | 132.47 | 479.749   | 946.539   | 0.0037   | 3.1   | 8.75    | 9148.5     | 9.4 HUMAN   | C9J5E7                                             | COX assembly mitochondrial protein homolog                     |
| 26064 | drMs_041712_NAR_30mM_plus.16516.16516.2  | 2 | 3.34 | 0 | 2.13E-05          | (K)QLQEK(K)LI Q E T M G V L S K(V)                 | 140.12 | 573.1812  | 1146.619  | -0.0036  | -3.1  | 6       | 83880.6    | 7.33 HUMAN  | F5H365                                             | Protein transport protein sec23A                               |
| 26065 | drMs_041712_NAR_30mM_plus.21763.21763.2  | 2 | 3.34 | 0 | 1.02E-05          | (R)ITLAFG(R)I T L A A G P T M A I F K(A)           | 168.57 | 679.9016  | 1358.804  | -0.0083  | -6.1  | 8.75    | 32621      | 8.75 HUMAN  | B4DLC0                                             | Poly(C)-binding protein 2                                      |
| 26066 | drMs_041712_NAR_30mM_plus.4836.4836.2    | 2 | 3.34 | 0 | 6.90E-05          | (R)MGCTQ(R)M G S I Q I T M E R(E)                  | 77.4   | 426.6986  | 852.37    | 0.0037   | 4.3   | 5.75    | 77399.7    | 9.09 HUMAN  | FS2272                                             | Heterogeneous nuclear ribonucleoprotein M                      |
| 26067 | drMs_041712_NAR_30mM_plus.5640.5640.2    | 2 | 3.34 | 0 | 3.85E-04          | (K)GSSNS(K)G S S N S V A I K(K)                    | 83.67  | 463.7311  | 926.458   | -0.0029  | -3.1  | 8.59    | 23047.2    | 9.95 HUMAN  | P4G782                                             | 40S ribosomal protein S5                                       |
| 26068 | drMs_041712_NAR_40mM_plus.15323.15323.3  | 3 | 3.34 | 0 | 1.08E-05          | (R)IETMLG(R)E T I M L G D V A V A H P P D(K)       | 156.37 | 527.286   | 1579.851  | -0.0078  | -4.9  | 5.32    | 141718.6   | 7.8 HUMAN   | B0V0A3                                             | Valine-tRNA ligase                                             |
| 26069 | drMs_041712_NAR_40mM_plus.7599.7599.2    | 2 | 3.34 | 0 | 1.68E-05          | (R)ISVDIF(R)S V G F D E R(R)                       | 104.45 | 437.1906  | 873.374   | 0.0020   | 0.2   | 4.37    | 22761.5    | 9.91 HUMAN  | C9J6W7                                             | Creatine kinase U-type, mitochondrial (Fragment)               |
| 26070 | drMs_041712_NAR_120mM_plus.11553.11553.3 | 3 | 3.34 | 0 | 2.85E-05          | (K)IKPQSG(K)T K P S I S D I N N Q(L)P A P G G R(L) | 128.32 | 658.0097  | 1973.2025 | -0.0119  | -8.7  | 17.6577 | 5.25 HUMAN | SD3D12      | Eukaryotic translation initiation factor 4 gamma 1 |                                                                |
| 26071 | drMs_041712_NAR_50mM_plus.17431.17431.3  | 3 | 3.34 | 1 | 3.34E-05 F138t    | (R)IYNVQD(R)I Y N V V G I S R E V P D F(R)         | 159.43 | 660.0107  | 1774.945  | 203.0729 | -3.7  | 6.07    | 80333.4    | 8.0 HUMAN   | Q9U199                                             | Nucleoylated alpha-linked acidic dipeptidase 2                 |
| 26072 | drMs_041712_NAR_50mM_plus.5826.5826.3    | 3 | 3.34 | 0 | 3.07E-04 T441 M5m | (K)SIAQSG(K)S/A Q V S A H I M D S K(V)             | 94.12  | 531.9144  | 1374.668  | 219.0665 | -8.7  | 6.46    | 13747.4    | 5.92 HUMAN  | Q8U4U3                                             | Uncharacterized protein Zlorf15                                |
| 26073 | drMs_041712_NAR_50mM_plus.13723.13723.2  | 2 | 3.34 | 1 | 3.36E-05          | (K)IGDPTD(K)I G I D P T K V V R(T)                 | 128.75 | 549.3331  | 1097.668  | -0.0088  | -8    | 8.75    | 61224.7    | 5.7 HUMAN   | P10809                                             | 60 kDa heat shock protein, mitochondrial                       |
| 26074 | drMs_041712_NAR_50mM_plus.5822.5822.3    | 3 | 3.34 | 0 | 1.32E-05          | (-K)YPAQA(-)Y P P A C E G D P R(S)                 | 88.53  | 449.8794  | 1347.636  | -0.0125  | -9.3  | 4.37    | 8704       | 5.05 HUMAN  | H0YCR2                                             | Sodium/glucose cotransporter 4 (Fragment)                      |
| 26075 | drMs_041712_NAR_120mM_plus.13397.13397.4 | 4 | 3.34 | 2 | 1.00E-06 M440m    | (R)IYVQVQ(R)I Y V V G I S R E V P D F(R)           | 127.45 | 461.7515  | 1065.427  | 231.9903 | -0.4  | 5.84    | 30699.7    | 9.95 HUMAN  | Q9U199                                             | Nucleoylated alpha-linked acidic dipeptidase 2                 |
| 26076 | drMs_041712_NAR_20mM_plus.10289.10289.2  | 2 | 3.33 | 0 | 9.30E-04          | (-K)RTPAG(-)R T N T G V L I C T P A S R(S)         | 152.63 | 680.3651  | 1359.705  | 0        | 0     | 9.75    | 30947.9    | 6.47 HUMAN  | H3BQ34                                             | Pyruvate kinase                                                |
| 26077 | drMs_041712_NAR_20mM_minus.14449.14449.3 | 3 | 3.33 | 0 | 5.82E-04          | (R)ITLGLQ(R)T G Q L F L V G S I V K(G)             | 198.64 | 444.9343  | 1332.789  | -0.0002  | -0.2  | 8.75    | 45924.5    | 5.29 HUMAN  | B4E1F3                                             | Selenium-binding protein 1                                     |
| 26078 | drMs_041712_NAR_30mM_plus.12483.12483.2  | 2 | 3.33 | 0 | 2.19E-05          | (K)NHLGG(K)N(H)I L G G V K(A)                      | 121.63 | 407.263   | 813.519   | -0.0025  | -0.7  | 8.75    | 118930.9   | 5.49 HUMAN  | P23214                                             | Ubiquitin-like modifier-activating enzyme 1                    |
| 26079 | drMs_041712_NAR_30mM_plus.5728.5728.2    | 2 | 3.33 | 0 | 1.60E-05 F728 Y7B | (R)IGSGS(R)I G S G D V I E C N R(K)                | 119.43 | 549.2337  | 1592.474  | 59.9364  | 12.5  | 6.75    | 145801.6   | 6.72 HUMAN  | Q9U199                                             | Xc-repair protein 6 (Fragment)                                 |
| 26080 | drMs_041712_NAR_30mM_minus.7371.7371.2   | 2 | 3.33 | 0 | 5.59E-04          | (R)KADQF(R)R A Q Q S S P A A D N R(E)              | 94.57  | 406.7069  | 812.405   | -0.0112  | -1.9  | 8.79    | 272689.3   | 5.79 HUMAN  | O15D20                                             | Spectrin beta chain, non-erythrocytic 2                        |
| 26081 | drMs_041712_NAR_50mM_minus.12741.12741.3 | 3 | 3.33 | 1 | 1.18E-04          | (R)IRLQSG(R)R L Q G V L E Q D D T A A E R(L)       | 140.88 | 596.2904  | 1786.868  | -0.0012  | -6.3  | 4.32    | 68118.7    | 8.68 HUMAN  | H0YGW7                                             | ATP-binding cassette sub-family F member 1                     |
| 26082 | drMs_041712_NAR_50mM_minus.5930.5930.3   | 3 | 3.33 | 1 | 7.79E-04 S174s    | (K)ITESDP(K)N E S D F S L D S E K H K(K)           | 95.88  | 572.9159  | 1636.745  | 79.9882  | 12.8  | 17.5    | 26757.5    | 8.58 HUMAN  | 85M2E5                                             | Methyltransferase-like 8 (Fragment)                            |
| 26083 | drMs_041712_NAR_50mM_plus.10045.10045.3  | 3 | 3.33 | 0 | 2.74E-04          | (K)IVSGSG(K)N S E C K P S L L L R(L)               | 115.45 | 428.9126  | 1284.752  | -0.0289  | -22.5 | 8.56    | 36313.6    | 8.76 HUMAN  | P47870-7                                           | Isomorph 3 of Gamma-aminobutyric acid receptor subunit beta-2  |
| 26084 | drMs_041712_NAR_50mM_minus.10826.10826.3 | 3 | 3.33 | 0 | 2.47E-05          | (K)PVEKVE(R)I E V E V M D L R(E)                   | 131.73 | 446.2105  | 1336.617  | 0.0001   | 0.1   | 4.4     | 18209.2    | 8.00 HUMAN  | 48M0Z2                                             | Nucleosome assembly protein 1-like 4 (Fragment)                |
| 26085 | drMs_041712_NAR_60mM_minus.12225.12225.3 | 3 | 3.33 | 2 | 2.56E-05          | (R)ISVDSV(R)I S D S V E F R D R D(R)               | 127.93 | 487.5978  | 1460.745  | -0.0337  | -2.3  | 4.68    | 71145.8    | 6.04 HUMAN  | F8W781                                             | Zinc finger CCH domain-containing protein 13                   |
| 26086 | drMs_041712_NAR_60mM_minus.14429.14429.3 | 3 | 3.33 | 1 | 2.19E-05          | (R)IKTTLQ(R)K T L Q V D T L W N A E I A A E R(S)   | 140.22 | 625.0044  | 1873.003  | -0.0039  | -2.1  | 4.68    | 23493.8    | 5.45 HUMAN  | F8V1L3                                             | Mysin-10                                                       |
| 26087 | drMs_041712_NAR_60mM_minus.8898.8898.3   | 3 | 3.33 | 1 | 1.72E-04          | (K)SHLOL(K)S H L D L V S V A H K(E)                | 109.98 | 406.8688  | 1216.659  | -0.0131  | -10.7 | 8.36    | 26240.1    | 6.53 HUMAN  | H38182                                             | Signal-regulatory protein beta-1 isoform 3 (Fragment)          |
| 26088 | drMs_041712_NAR_120mM_plus.4749.4749.3   | 3 | 3.33 | 0 | 3.08E-05          | (R)IYVQVQ(R)I Y N V V G I S R E V P D F(R)         | 75.27  | 401.6011  | 1026.561  | -0.0011  | -0.1  | 4.37    | 20799.2    | 6.72 HUMAN  | Q9U199                                             | Xc-repair protein 6 (Fragment)                                 |
| 26089 | drMs_041712_NAR_20mM_plus.13757.13757.2  | 2 | 3.33 | 0 | 5.96E-04          | (K)S9EAL(K)S A A E I A I A G P N E S I V K(S)      | 166.92 | 765.8901  | 1530.801  | -0.0101  | -6.6  | 4.25    | 47916.2    | 9.44 HUMAN  | P00505                                             | Aspartate aminotransferase, mitochondrial                      |
| 26090 | drMs_041712_NAR_20mM_plus.15231.15231.2  | 2 | 3.33 | 0 | 5.84E-04 S46s     | (K)ISGPKD(K)G I S V P I K D S K(K)                 | 176.1  | 577.312   | 944.541   | 203.0756 | -3.3  | 8.59    | 6775.1     | 9.82 HUMAN  | G3V3K0                                             | Retinol dehydrogenase 11                                       |
| 26091 | drMs_041712_NAR_20mM_plus.15986.15986.2  | 2 | 3.33 | 0 | 1.93E-05          | (K)IDAGTAK(K)D A G T V A E L A V L V R(L)          | 117.82 | 600.3422  | 1199.674  | 0.0029   | 2.4   | 5.84    | 17973      | 5.16 HUMAN  | E9P165                                             | Heat shock cognate 71 kDa protein (Fragment)                   |
| 26092 | drMs_041712_NAR_20mM_plus.16246.16246.3  | 3 | 3.33 | 0 | 1.70E-05          | (K)IDAGTAK(K)D A G T V A E L A V L V R(L)          | 133.65 | 405.5627  | 1199.674  | -0.0027  | -0.6  | 5.84    | 17973      | 5.16 HUMAN  | E9P165                                             | Heat shock cognate 71 kDa protein (Fragment)                   |
| 26093 | drMs_041712_NAR_20mM_plus.19338.19338.2  | 2 | 3.33 | 0 | 1.55E-05          | (K)NITGAV(R)T G A V D I V P V G E L L G V R(R)     | 230.58 | 812.9497  | 1624.891  | 0.0017   | 1     | 4.14    | 15338.4    | 5.51 HUMAN  | K7E1P1                                             | ATP synthase subunit alpha, mitochondrial (Fragment)           |
| 26094 | drMs_041712_NAR_30mM_plus.10708.10742.2  | 2 | 3.33 | 0 | 3.12E-05          | (K)QLVGVQ(K)Q L I V G N V M(K)                     | 110.95 | 435.7229  | 870.841   | -0.0022  | -2.5  | 8.75    | 50482.3    | 9.31 HUMAN  | P68104                                             | Elongation factor 1-alpha 1                                    |
| 26095 | drMs_041712_NAR_30mM_plus.15924.15924.2  | 2 | 3.33 | 0 | 9.00E-05          | (R)IMGAGM(R)M G A V G A G G L E R(M)               | 137.02 | 561.2636  | 1215.518  | 0.002    | 1.7   | 5.75    | 77799.7    | 9.09 HUMAN  | PS2272                                             | Heterogeneous nuclear ribonucleoprotein M                      |
| 26096 | drMs_041712_NAR_30mM_plus.20337.20337.3  | 3 | 3.33 | 0 | 5.88E-04 S196s    | (R)ITGWCPR(R)I G W C P P I F R(S)                  | 160.6  | 502.9201  | 1303.662  | 203.8462 | 3.2   | 9.47    | 24390.7    | 8.05 HUMAN  | Q07812                                             | Isomorph beta of Apoptosis regulator BAX                       |
| 26097 | drMs_041712_NAR_30mM_plus.4135.4135.2    | 2 | 3.33 | 0 | 1.35E-05 M299m    | (K)IYVQVQ(R)I Y N V V G I S R E V P D F(R)         | 117.47 | 549.2125  | 1065.427  | 231.9903 | -0.4  | 5.84    | 30699.7    | 9.95 HUMAN  | H48N22                                             | Tubulin beta chain-like protein COCK3B34                       |
| 26098 | drMs_041712                              |   |      |   |                   |                                                    |        |           |           |          |       |         |            |             |                                                    |                                                                |



|       |                                            |   |      |                     |                                                   |         |          |          |          |       |       |          |       |       |        |                                                                        |
|-------|--------------------------------------------|---|------|---------------------|---------------------------------------------------|---------|----------|----------|----------|-------|-------|----------|-------|-------|--------|------------------------------------------------------------------------|
| 26265 | dirMS_041712_NAR_60mM_plus.19418.19418.3   | 3 | 3.29 | 0.628E+05           | (K)VYSHLLG(K)K V S H L L G(V)W(I)T P T R(G)       | 159.83  | 524.6233 | 1571.854 | 0.0013   | 0.8   | 6.71  | 227783.5 | 5.5   | HUMAN | P35579 | Drosophila                                                             |
| 26266 | dirMS_041712_NAR_60mM_plus.19761.19761.3   | 3 | 3.29 | 0.153E+05 N556n     | (R)HPPFYT(R) F F V V I Y I R(A)                   | 163.87  | 512.9411 | 1333.694 | 2031.148 | 23.1  | 8.59  | 115965.7 | 4.6   | HUMAN | P10266 | HERV_K_Sg33.3 provirus ancestral Pol protein                           |
| 26267 | dirMS_041712_NAR_60mM_plus.20944.20944.3   | 3 | 3.29 | 0.132E+05           | (R)HGNV(R) H M C N G I V I R(G)                   | 109.92  | 424.8623 | 1094.824 | 2094.4   | 19.2  | 6.91  | 32894.2  | 6.24  | HUMAN | P09424 | Zinc finger protein 224                                                |
| 26268 | dirMS_041712_NAR_60mM_plus.9103.9103.3     | 3 | 3.29 | 1.673E+05           | (R)IUNRQ(V) D L V G(L)H V H S(K)E                 | 101.942 | 461.9268 | 1383.786 | -0.0197  | -14.2 | 8.61  | 28130.3  | 9.25  | HUMAN | ABMPT4 | Glutathione S-transferase theta-4                                      |
| 26269 | dirMS_041712_NAR_120mM_minus.13111.13111.4 | 4 | 3.28 | 1.246E+05           | (R)LASAL(R) L A S A L V A P S Y E H E D I K I(G)  | 125.45  | 472.0044 | 1885.007 | -0.0108  | -5.7  | 5.45  | 31803.9  | 8.87  | HUMAN | ESRNG1 | DNA replication licensing factor MCM4 (Fragment)                       |
| 26270 | dirMS_041712_NAR_120mM_minus.13156.13156.4 | 4 | 3.28 | 2.473E+05 K160k     | (K)NAEEN(K)K A K E E I N V L V G S R L E(K)K      | 126.33  | 466.7525 | 1749.961 | 114.0276 | -8.2  | 6.76  | 50855.3  | 7.14  | HUMAN | Q13414 | Fibrotectin                                                            |
| 26271 | dirMS_041712_NAR_120mM_minus.4975.4975.3   | 3 | 3.28 | 1.303E+05           | (K)AGADE(K)K A L D E E R A E T A P S I(G)         | 78.38   | 425.8687 | 1275.592 | -0.0009  | -0.7  | 4.21  | 57208.9  | 6.01  | HUMAN | FSGWF5 | Fosfinen protein 1 subunit beta                                        |
| 26272 | dirMS_041712_NAR_120mM_minus.8214.8214.2   | 2 | 3.28 | 1.309E+04           | (R)FYSVLK(R) S V E L V K(R)I                      | 98.58   | 439.7574 | 878.509  | -0.0019  | -2.2  | 8.75  | 20023.9  | 6.44  | HUMAN | HYV60  | Creatine kinase B-type (Fragment)                                      |
| 26273 | dirMS_041712_NAR_20mM_minus.11181.11181.3  | 3 | 3.28 | 1.374E+05           | (R)JGRDAR(R) G R D A E G T E V L S(R)R            | 159.7   | 453.2303 | 1303.66  | 0.0163   | 12.5  | 4.68  | 124488.2 | 9.65  | HUMAN | Q5T028 | Uncharacterized protein Ccorf132                                       |
| 26274 | dirMS_041712_NAR_30mM_minus.15556.15556.2  | 2 | 3.28 | 0.434E+05           | (R)YPNYS(R) P V P V S V N I K(A)G                 | 137.33  | 573.8282 | 1146.652 | -0.0026  | -2.3  | 8.59  | 44227.3  | 7.81  | HUMAN | ETE06E | T-complex protein 1 subunit alpha                                      |
| 26275 | dirMS_041712_NAR_30mM_minus.16742.16742.3  | 3 | 3.28 | 0.300E+05 M224m     | (K)MSTQA(K)M S V I D A M V S I(G)                 | 144.75  | 587.2756 | 1157.548 | 15.9957  | -0.7  | 8.34  | 266161   | 5.68  | HUMAN | EPFPU0 | Epiplakin                                                              |
| 26276 | dirMS_041712_NAR_30mM_minus.6993.6993.3    | 3 | 3.28 | 0.195E+05 K488n     | (K)VDVAV(K) V D V L V L V L V L V S I(G)          | 92.63   | 450.7376 | 1084.462 | 15.9594  | -1.9  | 4.02  | 13568.1  | 6.97  | HUMAN | K0R4T  | Keratin, type I cytoskeletal 8 (Fragment)                              |
| 26277 | dirMS_041712_NAR_30mM_minus.8043.8043.2    | 2 | 3.28 | 0.141E+05           | (R)NLTSP(R) N L Y L S C P L(R)I                   | 98.65   | 439.2266 | 874.53   | -0.0067  | -7.7  | 8.75  | 6939     | 10.41 | HUMAN | ESR6G6 | V-type protein ATPase subunit 8, brain isoform                         |
| 26278 | dirMS_041712_NAR_30mM_minus.8440.8440.2    | 2 | 3.28 | 0.135E+05           | (K)LTLSG(K) L T L A S G N P K(I)                  | 100.15  | 491.7642 | 986.527  | -0.0054  | -5.5  | 5     | 28768.5  | 8.64  | HUMAN | DR6108 | General transcription factor IIB subunit 2-like protein (Fragment)     |
| 26279 | dirMS_041712_NAR_40mM_minus.14547.14547.3  | 3 | 3.28 | 1.145E+05           | (K)GTVDPD(K) T V P P D A V E A L A D S L G K K(E) | 170.3   | 595.9791 | 1785.923 | -0.0001  | -0.1  | 4.23  | 81937.3  | 4.99  | HUMAN | B7Z448 | Calpastatin                                                            |
| 26280 | dirMS_041712_NAR_50mM_minus.10780.10780.3  | 3 | 3.28 | 1.140E+05 S396k     | (K)FLEGG(K) F L P L E E G R V A G K I(G)          | 129.58  | 505.2663 | 1433.811 | 79.7939  | 8.5   | 8.59  | 48376.2  | 6.73  | HUMAN | P0CAF1 | Informin 6 of Myocardial zonula adherens protein                       |
| 26281 | dirMS_041712_NAR_60mM_minus.13486.13486.3  | 3 | 3.28 | 1.167E+05           | (R)IGAGGG(R) A G G O G K L V T I I V L S P R(K)   | 135.4   | 552.6388 | 1650.908 | -0.0057  | -3.4  | 8.75  | 258215.9 | 5.48  | HUMAN | ETFN95 | Filamin-B                                                              |
| 26282 | dirMS_041712_NAR_60mM_minus.13720.13720.3  | 3 | 3.28 | 0.127E+05           | (R)AD57R(R) A D H P P A E I V T H A A S G A K(A)  | 136.4   | 549.2742 | 1645.973 | 0.0152   | 9.2   | 6     | 43303.4  | 8.7   | HUMAN | F8VRN8 | LIM domain and actin-binding protein                                   |
| 26283 | dirMS_041712_NAR_60mM_minus.17562.17562.2  | 2 | 3.28 | 1.190E+05           | (K)AAGTKT(K) A G V T D T V A F L S A L(R)         | 157.7   | 690.3818 | 1379.753 | 0.0034   | 2.5   | 8.64  | 60658.4  | 6.05  | HUMAN | B3KQF6 | Vacuolar protein sorting 33B (Ves1), isoform CRA_b                     |
| 26284 | dirMS_041712_NAR_120mM_plus.8555.8555.2    | 2 | 3.28 | 0.640E+04           | (R)NGVAV(R) R V G V M V S F S R I(G)              | 97.12   | 566.274  | 1131.536 | 0.0043   | 3.8   | 9.75  | 16500.2  | 10.31 | HUMAN | P98191 | 40S ribosomal protein S19                                              |
| 26285 | dirMS_041712_NAR_20mM_plus.12228.12228.3   | 3 | 3.28 | 0.451E+04 M183m     | (R)JALENH(R) L E M H L V K Q S V G V K I(M)       | 100.43  | 480.2359 | 1422.716 | 15.9733  | -12.2 | 6.66  | 115556.9 | 7.84  | HUMAN | ETETS2 | Zinc finger protein ZFP262                                             |
| 26286 | dirMS_041712_NAR_20mM_plus.13458.13458.2   | 2 | 3.28 | 0.146E+05 M273m     | (K)MISDAE(K) M I S D A V I P L E K I              | 165.18  | 566.7967 | 1116.597 | 15.9892  | -5    | 4.37  | 31330.8  | 9.26  | HUMAN | EP9282 | Malate dehydrogenase, mitochondrial                                    |
| 26287 | dirMS_041712_NAR_20mM_plus.17491.17491.2   | 2 | 3.28 | 0.309E+03           | (K)EGSIEQ(K) G S V E I D V I P V P K(I)           | 192.22  | 648.852  | 1296.705 | -0.0078  | -6    | 4.14  | 66923.1  | 6.88  | HUMAN | EP9335 | Methylcrotonyl-CoA carboxylase subunit alpha, mitochondrial (Fragment) |
| 26288 | dirMS_041712_NAR_30mM_plus.21227.21227.2   | 2 | 3.28 | 0.348E+03           | (R)GAFDN(R) A F Q A V L P F Q L S V R(I)          | 167.47  | 633.8153 | 1266.659 | -0.0022  | -2.5  | 9.75  | 86629.9  | 5.59  | HUMAN | ETV746 | Androgen receptor                                                      |
| 26289 | dirMS_041712_NAR_40mM_plus.26798.26798.2   | 2 | 3.28 | 0.258E+04           | (K)KACRQ(K) Q A E C S F Q K I(G)                  | 100.83  | 506.7868 | 1160.504 | 0.002    | 1.9   | 6.32  | 34992.1  | 6.52  | HUMAN | EP9282 | Espg1-2                                                                |
| 26290 | dirMS_041712_NAR_40mM_plus.9978.9978.2     | 2 | 3.28 | 0.481E+03           | (K)VVYMLA(K) V V E L A N A C K I(L)               | 123.07  | 502.7511 | 1004.498 | -0.0033  | -3.3  | 8.72  | 33029.4  | 9.62  | HUMAN | DR610L | Guanine nucleotide-binding protein subunit beta-2-like 1 (Fragment)    |
| 26291 | dirMS_041712_NAR_50mM_plus.17217.17217.3   | 3 | 3.28 | 1.337E+05           | (R)YVFLER(P) S W F N A D K V P K I(T)             | 158.8   | 460.5906 | 1379.757 | 0.0003   | 0.2   | 6.04  | 13378.8  | 6.27  | HUMAN | CJUS57 | Peptidyl-prolyl cis-trans isomerase                                    |
| 26292 | dirMS_041712_NAR_50mM_plus.19395.19395.3   | 3 | 3.28 | 0.250E+05           | (K)FLFHFS(K) F L F H T S L P I A E A P G K I(L)   | 172.83  | 580.9943 | 1740.968 | 0        | 0     | 6.75  | 108105.4 | 6.57  | HUMAN | ETFPD0 | Protein transport protein Sec24C                                       |
| 26293 | dirMS_041712_NAR_50mM_plus.2790.2790.2     | 2 | 3.28 | 1.115E+05           | (K)KLVNFK(K) L V N F S V N G F R I(G)             | 101.47  | 491.9027 | 1291.017 | -0.005   | -4.0  | 8.75  | 28944.6  | 6.39  | HUMAN | EP9341 | Eukaryotic translation initiation factor 4 gamma 2 (Fragment)          |
| 26294 | dirMS_041712_NAR_50mM_plus.9461.9461.3     | 3 | 3.28 | 1.224E+05 K1328k    | (K)ILDFLES(K) L D S L S E A R E Q E(K)            | 116.45  | 506.6003 | 1403.740 | 114.0375 | -3.6  | 6.18  | 187979   | 9.15  | HUMAN | OL1514 | Brain-specific angiogenesis inhibitor 2                                |
| 26295 | dirMS_041712_NAR_60mM_plus.15636.15636.3   | 3 | 3.28 | 1.551E+03 S2976k    | (R)IYNQNS(R) N Q D A S V R T F I K I(G)           | 137.47  | 487.2426 | 1379.228 | 79.9855  | 13.1  | 8.75  | 454925   | 5.33  | HUMAN | EP9H66 | Extracellular matrix protein FRAS1                                     |
| 26296 | dirMS_041712_NAR_60mM_plus.17021.17021.3   | 3 | 3.28 | 0.179E+05           | (R)ISGGG(R) R G S G G V G S H A L L L R I(S)      | 148.5   | 450.8323 | 1350.785 | -0.0029  | -2.1  | 9.49  | 58601.9  | 8.81  | HUMAN | B8Z238 | Leucine-rich PRR motif-containing protein, mitochondrial               |
| 26297 | dirMS_041712_NAR_60mM_plus.19808.19808.3   | 3 | 3.28 | 0.238E+05           | (R)NSVAV(K) N S V S A V S V L A S R I(G)          | 93.93   | 468.2405 | 1055.828 | -0.0013  | -1.1  | 6.75  | 26728.2  | 5.95  | HUMAN | Q13085 | Acetyl-CoA carboxylase 1                                               |
| 26298 | dirMS_041712_NAR_60mM_plus.7571.7571.3     | 3 | 3.28 | 0.293E+05           | (R)KNCPHV(K)K C P H V V G G T P R I(G)            | 97.75   | 431.5510 | 1293.653 | -0.0117  | -9    | 9.75  | 30944.2  | 6.22  | HUMAN | BI212N | ATP-dependent RNA helicase DDX39A                                      |
| 26299 | dirMS_041712_NAR_20mM_minus.10808.10808.2  | 2 | 3.27 | 0.514E+04           | (R)GVSLEFR(R) G S V L E P E T V I F K I(F)        | 155.8   | 679.3706 | 1357.721 | 0.013    | 9.6   | 4.25  | 54427.4  | 5.96  | HUMAN | K4D09  | Acetyl-CoA carboxylase 1                                               |
| 26300 | dirMS_041712_NAR_20mM_minus.11846.11846.3  | 3 | 3.27 | 1.340E+05           | (R)ISAEQD(R) S V A E D G L K H E Y E R I(E)       | 116.73  | 522.2561 | 1564.775 | -0.0217  | -13.9 | 5.45  | 85584.8  | 5.13  | HUMAN | IK3717 | Cyclin-dependent kinase 11B                                            |
| 26301 | dirMS_041712_NAR_20mM_minus.15307.15307.2  | 2 | 3.27 | 1.245E+05 K490k     | (K)NINQSK(K) M L N Q S G K I(G)                   | 135.53  | 474.2631 | 1146.658 | 114.0066 | 0     | 10    | 151040   | 5.88  | HUMAN | EP9ZT5 | Uncharacterized protein KIAA1017                                       |
| 26302 | dirMS_041712_NAR_30mM_minus.15681.15681.2  | 2 | 3.27 | 0.346E+05           | (K)LVNWK(K) L V N F S V N G F R I(G)              | 137.97  | 448.8355 | 1296.67  | -0.0058  | -4.5  | 8.75  | 71165.3  | 4.57  | HUMAN | IK3K13 | Claflrin heavy chain 1                                                 |
| 26303 | dirMS_041712_NAR_30mM_minus.16420.16420.2  | 2 | 3.27 | 1.158E+05 K90M.839k | (K)EFLTKT(K) E F L T K T A M R I(A)               | 142.38  | 677.8679 | 1224.677 | 130.0516 | 10.2  | 10    | 25482.5  | 10.06 | HUMAN | G3V2E1 | Spermatogenesis-associated protein 7 (Fragment)                        |
| 26304 | dirMS_041712_NAR_30mM_minus.8582.8601.2    | 2 | 3.27 | 0.113E+06           | (R)ILJVEE(R) L I E V N S R I(G)                   | 101.32  | 459.2546 | 917.505  | -0.0031  | -3.4  | 6     | 16214.9  | 4.91  | HUMAN | G3V505 | Thiamine triphosphatase                                                |
| 26305 | dirMS_041712_NAR_40mM_minus.7669.7669.3    | 3 | 3.27 | 1.775E+04 S349k     | (K)ESDGG(K) E S D G L V G L V S G R I(G)S V R(I)  | 123.6   | 583.9659 | 1546.782 | 203.1102 | 12.5  | 6.17  | 304146   | 7.19  | HUMAN | OL1518 | PQZ domain-containing protein 2                                        |
| 26306 | dirMS_041712_NAR_50mM_minus.11479.11479.3  | 3 | 3.27 | 1.959E+04           | (K)GKLVN(K) K L V N F S V N G F R I(G)            | 131.1   | 516.6723 | 1095.823 | -0.0017  | -4.1  | 6.04  | 30722    | 6.82  | HUMAN | EP9329 | RuvB-like 1                                                            |
| 26307 | dirMS_041712_NAR_50mM_minus.13833.13833.3  | 3 | 3.27 | 2.280E+05 Y199k     | (K)VLG68(R) K M L V N I V I S Q G E L L Y R(I)    | 146.68  | 595.9399 | 1706.021 | 79.9461  | -11.3 | 9.7   | 76144.8  | 6.1   | HUMAN | EP9304 | 1,4-alpha-glucan-branching enzyme                                      |
| 26308 | dirMS_041712_NAR_50mM_minus.6152.6152.3    | 3 | 3.27 | 1.183E+04           | (K)AGSNTQ(K) G S N T Q K V M L L C S E(K)         | 97.82   | 622.6372 | 1865.9   | -0.0026  | -1.4  | 10    | 34985.7  | 10.46 | HUMAN | ESR688 | Zinc fingers and homeobox protein 1                                    |
| 26309 | dirMS_041712_NAR_50mM_minus.8181.8181.3    | 3 | 3.27 | 0.205E+05 K101k     | (K)AVWPC(K) A V W P Q V V D R I(R)                | 114.37  | 496.9372 | 1374.753 | 114.0442 | 0.9   | 8.63  | 35755.5  | 10.24 | HUMAN | Q5V794 | Zinc finger hormone inducible transmembrane protein                    |
| 26310 | dirMS_041712_NAR_50mM_minus.7816.7816.3    | 3 | 3.27 | 1.340E+05           | (K)NWDNR(K) N W D N R V S V L A S R I(G)          | 160.9   | 516.6999 | 1525.828 | -0.0013  | -0.3  | 8.65  | 58214.7  | 5.25  | HUMAN | B4D3M7 | T-complex protein 1 subunit theta                                      |
| 26311 | dirMS_041712_NAR_60mM_minus.4085.4085.3    | 3 | 3.27 | 1.651E+03           | (F)MVDVDE(K) M D V D K G M E M S V I(G)           | 93.05   | 494.235  | 1480.700 | -0.0117  | -7.9  | 4.32  | 3913.2   | 4.23  | HUMAN | ETVWV4 | Thrombospondin domain-containing protein 2                             |
| 26312 | dirMS_041712_NAR_60mM_minus.8527.8527.3    | 3 | 3.27 | 0.271E+04           | (K)ELQVNE(K) E L Q V N I S Q G E L L Y R(I)       | 107.28  | 458.2407 | 1372.700 | 0.0009   | 0.6   | 4.53  | 279771.8 | 9.54  | HUMAN | QBNDH2 | Coiled-coil domain-containing protein 168                              |
| 26313 | dirMS_041712_NAR_120mM_plus.15188.15188.4  | 4 | 3.27 | 0.658E+05 K84k      | (R)KGVSPV(R) G V S P L G L A T L Q L D L R(K)     | 132.47  | 474.2836 | 1780.609 | 114.0435 | 0.3   | 8.75  | 19024.4  | 11.62 | HUMAN | BD4K16 | Charged multivesicular body protein 7                                  |
| 26314 | dirMS_041712_NAR_120mM_plus.15007.15007.3  | 3 | 3.27 | 0.494E+05 T100t     | (R)HSPSFA(K) S F S S P A P L P H E A T P R S I(G) | 135.05  | 618.285  | 1772.893 | 79.9434  | -12.4 | 6.41  | 136757.5 | 5.83  | HUMAN | FBW8E2 | Anion exchange protein 2                                               |
| 26315 | dirMS_041712_NAR_120mM_plus.20743.20743.4  | 4 | 3.27 | 2.188E+05           | (R)HVSAGE(R) H V S A G E L V L E I M M K R(E)     | 160.77  | 491.9027 | 1291.017 | -0.0117  | -11.6 | 13.23 | 23291.1  | 7.21  | HUMAN | MYH1-7 | Myosin-7                                                               |
| 26316 | dirMS_041712_NAR_120mM_plus.22891.         |   |      |                     |                                                   |         |          |          |          |       |       |          |       |       |        |                                                                        |







|       |                                            |   |      |   |          |                                                         |                              |        |          |          |          |       |      |          |       |       |        |                                                                              |
|-------|--------------------------------------------|---|------|---|----------|---------------------------------------------------------|------------------------------|--------|----------|----------|----------|-------|------|----------|-------|-------|--------|------------------------------------------------------------------------------|
| 26592 | dirMS_041712_NAR_20mM_plus.17216.17216.3   | 3 | 3.2  | 0 | 1.85E+05 | (R)AVIAE(R)A(V)A I E N P A S(D)S(V)S I S S(R)N          |                              | 189.12 | 580.9864 | 1740.949 | -0.0044  | -2.5  | 4.37 | 33022.6  | 4.78  | HUMAN | ANE09  | Protein RPSAP58                                                              |
| 26593 | dirMS_041712_NAR_20mM_plus.17343.17343.3   | 3 | 3.2  | 0 | 3.74E+05 | M193m (K)STGAL(K)K(S)T E A L V G Q L M G A A V T L K(N) | m.Distal telomere            | 191.22 | 587.9829 | 1745.947 | 15.9875  | -4.2  | 5.72 | 23940.3  | 5.54  | HUMAN | H3800  | Ubiquitome biosynthesis protein COQ9, mitochondrial                          |
| 26594 | dirMS_041712_NAR_20mM_plus.18214.18214.3   | 3 | 3.2  | 0 | 1.60E+05 | (R)SIVG(R)R(V)S L G A T S(V)G Q R(L)                    |                              | 139.47 | 608.8139 | 1226.657 | 0.0037   | 3.1   | 5.35 | 45763.5  | 9.93  | HUMAN | Q9H2C5 | Eukaryotic peptide chain release factor subunit 1                            |
| 26595 | dirMS_041712_NAR_20mM_plus.18463.18463.3   | 3 | 3.2  | 0 | 1.88E+04 | (R)IAPV(S)R(P)V P A S E L(L)A(S)G V S L R(A)            |                              | 159.97 | 522.9655 | 1566.885 | -0.003   | -1.9  | 6.05 | 53377.8  | 5.74  | HUMAN | Q15149 | Plectin                                                                      |
| 26596 | dirMS_041712_NAR_20mM_plus.18495.18495.3   | 3 | 3.2  | 0 | 1.88E+04 | (R)IAPV(S)R(P)V P A S E L(L)A(S)G V S L R(A)            |                              | 159.97 | 522.9655 | 1566.885 | -0.003   | -1.9  | 6.05 | 53377.8  | 5.74  | HUMAN | Q15149 | Plectin                                                                      |
| 26597 | dirMS_041712_NAR_20mM_plus.8170.8170.2     | 2 | 3.2  | 0 | 7.99E+04 | T282i M8 (K)YVW(G)K(V)W D I G M V N(K)                  | t.HNectin domain (P)trans    | 126.28 | 615.8042 | 1011.518 | 219.0382 | -7.2  | 5.83 | 70280.6  | 8.97  | HUMAN | IL3116 | Pulviate ATP-dependent RNA helicase DHX33 (Fragment)                         |
| 26598 | dirMS_041712_NAR_20mM_plus.3804.3804.2     | 2 | 3.2  | 0 | 1.30E+05 | (K)STTS(L)P(R)S T S D L P P G L S(K)                    |                              | 138.47 | 608.8139 | 1226.657 | 0.0037   | 3.1   | 5.35 | 45763.5  | 9.93  | HUMAN | Q9H2C5 | Nuclear receptor coactivator 5                                               |
| 26599 | dirMS_041712_NAR_30mM_plus2.18365.18365.2  | 2 | 3.2  | 1 | 2.39E+05 | (K)SDSAA(K)S D I K S A V S D S(K)V                      |                              | 149.22 | 561.7934 | 1122.564 | 0.0158   | 16.1  | 5.68 | 249766.9 | 6.66  | HUMAN | B2T76  | CK1X protein                                                                 |
| 26600 | dirMS_041712_NAR_30mM_plus2.19364.19364.2  | 2 | 3.2  | 0 | 5.03E+04 | (K)YVQLL(K)Y P P A S E L(L)A(S)G V S L R(A)             |                              | 153.65 | 528.814  | 1056.62  | 0.0007   | 0.6   | 8.75 | 45228.3  | 6.03  | HUMAN | F5H737 | Adenosylhomocysteine                                                         |
| 26601 | dirMS_041712_NAR_30mM_plus2.20589.20589.2  | 2 | 3.2  | 0 | 2.04E+05 | (R)ITLPLG(R)R(T)I L L P G L G L K(T)                    |                              | 161.22 | 478.3126 | 955.619  | -0.007   | -0.8  | 8.41 | 55373.1  | 7.25  | HUMAN | F5H071 | Phenylalanine-tRNA ligase beta subunit                                       |
| 26602 | dirMS_041712_NAR_30mM_plus2.22528.22528.2  | 2 | 3.2  | 0 | 6.10E+04 | (R)ILEGTL(R)E L G L T R M L P L R(Q)                    |                              | 174.63 | 510.3766 | 1415.748 | -0.0019  | -1.3  | 4.14 | 13588.1  | 4.66  | HUMAN | FBV067 | Keratin, type II cytoskeletal 8 (Fragment)                                   |
| 26603 | dirMS_041712_NAR_30mM_plus2.6448.6448.2    | 2 | 3.2  | 0 | 1.29E+05 | (R)GQTS(L)K(E)Y L V L S L R(Q)                          |                              | 87.4   | 489.711  | 898.427  | -0.0034  | -3.7  | 5.72 | 61092.2  | 5.17  | HUMAN | E7C094 | erin                                                                         |
| 26604 | dirMS_041712_NAR_30mM_plus2.8559.8559.2    | 2 | 3.2  | 0 | 4.00E+05 | (R)IFAGDQ(R)P(A)Q I Q V K(G)                            |                              | 140.07 | 417.2466 | 833.488  | -0.002   | -2.4  | 8.75 | 11439.8  | 9.3   | HUMAN | G3XAN8 | Mitochondrial import inner membrane translocase subunit Timb 8               |
| 26605 | dirMS_041712_NAR_40mM_plus2.12655.12655.3  | 3 | 3.2  | 0 | 5.25E+04 | (K)SLEDLDF(R)K L E V I F E S L P N A S H S(K)L          |                              | 98.12  | 643.6587 | 1928.956 | 0.0015   | 0.8   | 4.4  | 46401.7  | 6.35  | HUMAN | B4DK25 | Arginyl-tRNA-protein transferase 1                                           |
| 26606 | dirMS_041712_NAR_40mM_plus2.9244.9244.3    | 3 | 3.2  | 0 | 7.25E+03 | M115m (R)YVHGGT(R)R M L G E/T T N P A D S K P G T I R   | m.Distal telomere            | 113.13 | 604.3077 | 1785.916 | 15.9922  | -1.5  | 6.04 | 15431.7  | 9     | HUMAN | E7E6L0 | Nucleoside diphosphate kinase A                                              |
| 26607 | dirMS_041712_NAR_50mM_plus2.10565.10565.3  | 3 | 3.2  | 1 | 2.09E+04 | (R)YVQEA(R)Y V Q L E A G L G L S I K(Q)                 |                              | 122.6  | 466.839  | 1298.832 | -0.1158  | -11.3 | 5.86 | 58405    | 9.49  | HUMAN | Q14245 | Beta-2-ytroglobin                                                            |
| 26608 | dirMS_041712_NAR_50mM_plus2.14224.14224.3  | 3 | 3.2  | 0 | 9.93E+05 | (R)YVATK(R)R(A)T K P R V L V A L A Q R(K)               |                              | 143.58 | 514.9831 | 1542.937 | -0.0019  | -1.2  | 9.99 | 65918.2  | 9.74  | HUMAN | E7EQV3 | Polyadenylate-binding protein 1                                              |
| 26609 | dirMS_041712_NAR_60mM_plus.10169.10169.3   | 3 | 3.2  | 1 | 3.71E+05 | (K)ITAVD(C)K(T)A/V C/D P P P G K(M)                     | C.Carbonic dehydratase I     | 110.05 | 442.9125 | 1326.72  | 0.0031   | 2.3   | 8.41 | 50199.4  | 4.75  | HUMAN | AN6N22 | Tubulin beta-8 chain-like protein LOC260334                                  |
| 26610 | dirMS_041712_NAR_60mM_plus.13173.13173.3   | 3 | 3.2  | 1 | 1.08E+05 | S211s (K)SIVSD(K)K(S) L V D K T S I S E I(K)V           |                              | 125.67 | 499.594  | 1293.69  | 203.0778 | -1.1  | 5.79 | 58791    | 9.93  | HUMAN | EP804  | Ladman-1                                                                     |
| 26611 | dirMS_041712_NAR_60mM_plus.20865.20865.3   | 3 | 3.2  | 1 | 8.00E+03 | K292K (R)IVALPQ(R)A L P V D G T V V T V R V(K)          | m.Neely-4                    | 170.57 | 523.9774 | 1455.853 | 114.6647 | 13.9  | 8.72 | 61891.7  | 6.06  | HUMAN | Q6S182 | Sorting nexin-27                                                             |
| 26612 | dirMS_041712_NAR_60mM_plus.8838.8838.3     | 3 | 3.2  | 0 | 5.51E+05 | (K)YVNDN(K)K(V)D N D E H Q C L S L R(T)                 |                              | 103.32 | 523.5814 | 1568.73  | -0.0003  | -0.2  | 6.31 | 6862.5   | 4.32  | HUMAN | ESK6W4 | Nucleohistamin (Fragment)                                                    |
| 26613 | dirMS_041712_NAR_60mM_plus.9792.9792.3     | 3 | 3.2  | 0 | 7.66E+05 | (R)IQEGR(Q)Q L E G F K P M P V Y M E A R(E)             |                              | 109.3  | 547.5879 | 1640.749 | 0.0006   | 0.4   | 6.14 | 58856.7  | 6.26  | HUMAN | QBWX17 | Paraspeckle component 1                                                      |
| 26614 | dirMS_041712_NAR_120mM_minus.12701.12701.4 | 4 | 3.19 | 2 | 9.80E+04 | (K)QYVEE(K)Y Q E I S V W K L S V S T T S A R(E)         |                              | 122.3  | 483.0061 | 1928.992 | 0.0102   | 5.3   | 8.5  | 260507.5 | 5.04  | HUMAN | Q9YR85 | Protein dopey-2                                                              |
| 26615 | dirMS_041712_NAR_120mM_minus.13926.13926.3 | 3 | 3.19 | 1 | 1.12E+05 | S154s (K)SIOGGG(K)Y G G G S V L D F S W R K(RF)         | s.NeXtron                    | 129.87 | 544.9536 | 1426.728 | 213.1178 | 23.6  | 10   | 12845.9  | 10.91 | HUMAN | HDY5W8 | Monocarboxylate transporter 10 (Fragment)                                    |
| 26616 | dirMS_041712_NAR_120mM_minus.18680.18680.3 | 3 | 3.19 | 0 | 7.86E+03 | (R)HMLN(R)R F A L G G W G L D S K V S W(T)              |                              | 156.62 | 586.2907 | 1766.877 | 0.0034   | 2.8   | 5.9  | 47960.5  | 5.63  | HUMAN | Q9YR93 | Leukotriene A <sub>4</sub> hydrolase                                         |
| 26617 | dirMS_041712_NAR_20mM_minus.8315.8315.2    | 2 | 3.19 | 0 | 7.00E+04 | T720T (K)ILKLAG(R)K(L)A A G W D R(R)                    | t.NeXtron                    | 132.53 | 671.8364 | 1139.596 | 203.6999 | -7.1  | 6.74 | 36302    | 9.29  | HUMAN | Q9B9Y4 | Guanine nucleotide-binding protein subunit beta-like protein 1               |
| 26618 | dirMS_041712_NAR_30mM_minus2.11566.11566.2 | 2 | 3.19 | 0 | 4.29E+04 | (R)IHDVIC(D)R V I D I C G D R(K)                        | C.Carbonic dehydratase I     | 116.52 | 488.2587 | 975.518  | -0.0078  | -8    | 4.21 | 26180    | 5.09  | HUMAN | Q6E17  | Ras-related protein Rab-3C                                                   |
| 26619 | dirMS_041712_NAR_30mM_minus2.18832.18832.2 | 2 | 3.19 | 0 | 6.82E+04 | (K)IAPV(F)K(A)P P V D V F V A P R(L)                    |                              | 157.32 | 591.8008 | 1124.594 | 0.001    | 0.1   | 5.88 | 71218.8  | 6.3   | HUMAN | A7YH   | Radin                                                                        |
| 26620 | dirMS_041712_NAR_30mM_minus2.10562.10562.3 | 3 | 3.19 | 2 | 1.33E+05 | S4977s (K)SIVSD(K)K(S) L V D K T S I S E I(K)V          | s.Phosphorylation 5          | 140.2  | 601.921  | 1846.626 | 203.0778 | -1.2  | 6.41 | 61891.7  | 6.06  | HUMAN | Q6S182 | Fibrous sheath-interacting protein 1                                         |
| 26621 | dirMS_041712_NAR_40mM_minus2.8152.8152.3   | 3 | 3.19 | 0 | 1.68E+05 | S815s (R)ILLAE(E)R L A E I E K F G D K I K(E)           | m.Distal telomere/centromere | 128.68 | 652.6822 | 1917.940 | 203.0833 | -2    | 4.87 | 38926.6  | 5.94  | HUMAN | Q5WVX3 | Kin domain-containing, RNA-binding, signal transduction-associated protein 2 |
| 26622 | dirMS_041712_NAR_50mM_minus2.16356.16356.3 | 3 | 3.19 | 0 | 5.32E+04 | (K)ITTHN(C)K(T)A/V E I H T L S L R(F)                   |                              | 116.2  | 579.326  | 1735.97  | -0.0067  | -3.8  | 6.41 | 95922.4  | 6.36  | HUMAN | J3KPV4 | DNA replication licensing factor MCM4                                        |
| 26623 | dirMS_041712_NAR_50mM_minus2.18673.18673.3 | 3 | 3.19 | 0 | 3.40E+05 | (R)IAGKVP(R)K(V)P V I C A T Q L M L E S M I(K)          | C.Carbonic dehydratase I     | 180.9  | 626.3309 | 1876.969 | 0.0088   | 4.2   | 6.41 | 14766.1  | 5.78  | HUMAN | H3BSU3 | Pyruvate kinase (Fragment)                                                   |
| 26624 | dirMS_041712_NAR_50mM_minus2.9623.9623.3   | 3 | 3.19 | 0 | 2.08E+05 | (R)IAGKVP(R)K(V)P V I C A T Q L M L E S M I(K)          |                              | 180.9  | 626.3309 | 1876.969 | 0.0088   | 4.2   | 6.41 | 14766.1  | 5.78  | HUMAN | H3BSU3 | Pyruvate kinase (Fragment)                                                   |
| 26625 | dirMS_041712_NAR_60mM_minus.11867.11867.3  | 3 | 3.19 | 0 | 1.92E+05 | (R)IHLHLLG(R)R L H L A L G G E G P R(T)                 |                              | 126.37 | 402.2384 | 1204.705 | -0.0042  | -3.5  | 6.75 | 99028.8  | 5.32  | HUMAN | Q9YF78 | Comodomer subunit gamma-1                                                    |
| 26626 | dirMS_041712_NAR_60mM_minus.14570.14570.3  | 3 | 3.19 | 1 | 1.54E+05 | (R)IAVLVY(D)R A V L Y A D Y R A P G A R(F)              |                              | 141.03 | 507.2655 | 1519.802 | -0.0196  | -12.9 | 8.63 | 73233.7  | 5.52  | HUMAN | B4DN67 | Kin of IRRE-like protein 1                                                   |
| 26627 | dirMS_041712_NAR_60mM_minus.14837.14837.3  | 3 | 3.19 | 1 | 2.10E+05 | (K)IYDLSR(K)K(S)D S R L E Q V L T S A E G T S(K)        |                              | 142.88 | 604.3095 | 1801.918 | -0.0042  | -2.3  | 4.68 | 54214.9  | 5.66  | HUMAN | C9J813 | Caldesmon (Fragment)                                                         |
| 26628 | dirMS_041712_NAR_60mM_minus.18859.18859.3  | 3 | 3.19 | 0 | 6.64E+04 | S883 (K)KIDR(V)R(K)S V R I H L D F E K(G)               | s.Phosphorylation 5          | 154.67 | 522.2733 | 1484.822 | 79.584   | 10.9  | 6.75 | 11896    | 9.85  | HUMAN | Q9H2K0 | Translation initiation factor IF-3, mitochondrial                            |
| 26629 | dirMS_041712_NAR_60mM_minus.19464.19464.3  | 3 | 3.19 | 1 | 5.47E+05 | M453m (K)RTTIGP(R)R T L G G P R G G W L L V D G R(G)    | m.Distal telomere/centromere | 174.4  | 620.3279 | 1728.944 | 130.0266 | -6    | 8.41 | 55394.8  | 7.77  | HUMAN | B8ZT55 | T-complex protein 1 subunit eta                                              |
| 26630 | dirMS_041712_NAR_60mM_minus.5671.5671.2    | 2 | 3.19 | 0 | 4.22E+02 | K97A (R)YVYNDP(R)Y V M T P D P I K(E)                   | s.NeXtron                    | 86.55  | 576.7856 | 949.499  | 203.065  | -12.5 | 5.8  | 19714.4  | 6.7   | HUMAN | IL31D0 | WD repeat domain phosphoinositide-interacting protein 1                      |
| 26631 | dirMS_041712_NAR_60mM_minus.6974.6974.3    | 3 | 3.19 | 0 | 1.21E+05 | (K)ITQAVG(K)K(Q)A Y Q D K P G T S G L R(K)              |                              | 97.4   | 550.6109 | 1649.824 | -0.006   | -3.7  | 8.25 | 61733.3  | 6.3   | HUMAN | P36871 | Phosphoglucosyltransferase 1                                                 |
| 26632 | dirMS_041712_NAR_60mM_minus.9749.9749.3    | 3 | 3.19 | 1 | 2.21E+05 | (R)ILKAE(E)K(R)K A E V A L L Q Q Q K(E)                 |                              | 114.58 | 466.9338 | 1399.795 | -0.0023  | -5.9  | 6.14 | 53377.8  | 5.74  | HUMAN | Q15149 | Plectin                                                                      |
| 26633 | dirMS_041712_NAR_120mM_plus.4331.4331.2    | 2 | 3.19 | 1 | 1.02E+05 | (R)IAGKVP(R)K(V)P V I C A T Q L M L E S M I(K)          |                              | 127.3  | 612.9177 | 1826.941 | -0.0027  | -4.1  | 6.41 | 14766.1  | 5.78  | HUMAN | H3BSU3 | T-complex protein 1 subunit zeta                                             |
| 26634 | dirMS_041712_NAR_120mM_plus.17729.17729.4  | 4 | 3.19 | 0 | 1.14E+05 | (K)ITKTHN(C)K(T)E I N E L L Q P T L L S R(F)            |                              | 145.95 | 466.7655 | 1864.065 | -0.0249  | -13.4 | 8.76 | 95792.4  | 6.36  | HUMAN | Q9KPV4 | DNA replication licensing factor MCM4                                        |
| 26635 | dirMS_041712_NAR_120mM_plus.23181.23181.3  | 3 | 3.19 | 1 | 2.88E+05 | (K)IGLAPD(L)K(L)A V P D L S P H L V K I(K)              |                              | 174.4  | 608.0076 | 1822.011 | -0.0027  | -1.5  | 6.38 | 16789.5  | 10.63 | HUMAN | J3KMX5 | 40S ribosomal protein S13                                                    |
| 26636 | dirMS_041712_NAR_120mM_plus.6751.6751.3    | 3 | 3.19 | 1 | 1.39E+05 | (R)IRDQVE(R)R Q Q Q L V I E T E L K(M)                  |                              | 88.48  | 420.5562 | 1259.659 | -0.005   | -3.9  | 4.79 | 51612.9  | 9.98  | HUMAN | P08621 | U1 small nuclear ribonucleoprotein 70 kDa                                    |
| 26637 | dirMS_041712_NAR_20mM_plus.11674.11674.2   | 2 | 3.19 | 0 | 1.33E+05 | (R)IAGKVP(R)K(V)P V I C A T Q L M L E S M I(K)          |                              | 153.48 | 628.3565 | 1825.712 | -0.006   | -4.8  | 6.79 | 58799.6  | 6.23  | HUMAN | Q9H2D7 | T-complex protein 1 subunit zeta                                             |
| 26638 | dirMS_041712_NAR_30mM_plus2.17663.17663.3  | 3 | 3.19 | 0 | 5.86E+05 | (K)ISMDPQ(K)S I S M Q P V N L M L K(G)                  |                              | 146.12 | 415.225  | 1243.671 | -0.011   | -8.9  | 5.84 | 629603.7 | 5.8   | HUMAN | Q9Q666 | Neuroblast differentiation-associated protein ANNAK                          |
| 26639 | dirMS_041712_NAR_30mM_plus2.17666.17666.2  | 2 | 3.19 | 0 | 6.38E+05 | (R)ILMLGLE(R)R(M)G L E A L K(G)                         |                              | 146.48 | 437.7572 | 875.502  | -0.0075  | -8.6  | 6    | 4886.6   | 6     | HUMAN | D6R27  | T-complex protein 1 subunit epsilon                                          |
| 26640 | dirMS_041712_NAR_30mM_plus2.22522.22522.2  | 2 | 3.19 | 0 | 2.16E+04 | (R)IHLWDF(R)R W L V D F A S R(K)                        |                              |        |          |          |          |       |      |          |       |       |        |                                                                              |







|       |                                            |   |      |           |          |                                                  |                              |        |          |          |          |       |      |          |       |       |          |                                                                       |
|-------|--------------------------------------------|---|------|-----------|----------|--------------------------------------------------|------------------------------|--------|----------|----------|----------|-------|------|----------|-------|-------|----------|-----------------------------------------------------------------------|
| 27028 | dirMS_041712_NAR_50mM_minus.16359.16359.3  | 3 | 3.09 | 1.125E+05 | 5713s    | (KVLVPPCIE)(K)Q/VLP/P C I I S G N G T/A s x K(E) | C.Carbonmethylation L-h.sau  | 160.55 | 615.6611 | 1641.899 | 203.0695 | -5.4  | 10   | 141996.1 | 8.78  | HUMAN | FRW614   | AFA/FRM2 family member 2                                              |
| 27029 | dirMS_041712_NAR_50mM_minus.2449.7449.3    | 3 | 3.09 | 2.177E+04 | 5278s    | (KILVPEE)(K)I/WK V D A L S F K(S)                | n-Neutrophilicase 5          | 107.72 | 505.6001 | 1434.81  | 79.5754  | 6     | 8.59 | 49641.1  | 5.95  | HUMAN | CN3199   | Collec-toid domain-containing protein 10C2                            |
| 27030 | dirMS_041712_NAR_50mM_minus.8006.8006.2    | 3 | 3.09 | 1.932E+04 | 5130s    | (KILVPEE)(K)I/VVCE/LV D L L K(R)                 | n-Neutrophilicase 5          | 126.6  | 624.9139 | 1434.81  | 79.5754  | -2.6  | 8.99 | 20399.9  | 6.25  | HUMAN | OC083934 | Tubulin beta 8 chain-like protein LOC2083934                          |
| 27031 | dirMS_041712_NAR_60mM_minus.11390.11390.3  | 3 | 3.09 | 2.119E+05 | 5340s    | (KILVPAEQ)(K)Y/AP/AE Q R F G S R(F)              | n-Neutrophilicase 5          | 123.3  | 470.5828 | 1409.728 | 0.0054   | 3.8   | 9.99 | 65440.2  | 9.24  | HUMAN | FGSK30   | Polyhydroxioctic protein 1                                            |
| 27032 | dirMS_041712_NAR_60mM_minus.16537.16537.3  | 3 | 3.09 | 1.923E+04 | 5130s    | (R)KJSGLE (R)K Q/S L E V L G D T L N A A(K)      | n-Neutrophilicase 5          | 152.13 | 514.9657 | 1542.885 | -0.0024  | -1.6  | 8.59 | 31075.7  | 5.65  | HUMAN | PM0174   | Triosephosphate isomerase                                             |
| 27033 | dirMS_041712_NAR_60mM_minus.16873.16873.3  | 3 | 3.09 | 1.102E+05 | 5340s    | (K)KIDQWC(K)C V Q W D A U/G S L/T H S R(I)       | C.Carbonmethylation          | 158.38 | 586.9446 | 1758.823 | -0.0035  | -2    | 5.21 | 80254.2  | 5.05  | HUMAN | DBP6K4   | Alpha actinin 4 short isoform                                         |
| 27034 | dirMS_041712_NAR_60mM_minus.27669.27669.3  | 3 | 3.09 | 3.334E+05 | M3139m   | (K)IDGEMV(K)G D L V A/V R U S/D L L K(R)         | n-Neutrophilicase 5          | 159.22 | 511.9372 | 1517.811 | 15.9839  | -7.1  | 3.91 | 40436.8  | 6.52  | HUMAN | QVQD08   | Dynamin heavy chain 14, neuronal                                      |
| 27035 | dirMS_041712_NAR_60mM_minus.48397.48397.3  | 3 | 3.09 | 1.06E+05  | 5340s    | (R)IUTLTL(R)I/VV/LV/L T L D L R(K)               | n-Neutrophilicase 5          | 163.88 | 463.6066 | 1307.805 | -0.0053  | -4.1  | 6.75 | 45212.4  | 9.41  | HUMAN | BZ7233   | Acetyl-CoA acetyltransferase, cytosolic                               |
| 27036 | dirMS_041712_NAR_60mM_minus.8402.8402.3    | 3 | 3.09 | 1.230E+04 | 5130s    | (R)VAASVTL(R)Y A/S/L T L D L R(K)                | n-Neutrophilicase 5          | 106.95 | 411.5582 | 1232.659 | 0.0007   | 0.6   | 5.93 | 108862.2 | 4.84  | HUMAN | OM60763  | General vesicular transport factor p115                               |
| 27037 | dirMS_041712_NAR_60mM_minus.9131.9131.3    | 3 | 3.09 | 3.116E+05 | 5340s    | (K)IGPQDP(K)K P/G V D/P/P G P G G E A V G(Q)     | n-Neutrophilicase 5          | 110.53 | 511.5711 | 1532.72  | -0.0213  | -13.9 | 6    | 248823.5 | 6.45  | HUMAN | AGN2M7   | Collagen alpha-6(VI) chain                                            |
| 27038 | dirMS_041712_NAR_120mM_plus.11899.11899.3  | 3 | 3.09 | 1.123E+05 | K128k    | (R)ISDVT(R)S V T V D/V/P/K N(L)                  | n-Ubiquitin-K                | 115.78 | 416.2283 | 1132.621 | 114.0435 | 0.5   | 6.07 | 22074.7  | 6.12  | HUMAN | SL1177   | Tekin-5 (Fragment)                                                    |
| 27039 | dirMS_041712_NAR_120mM_plus.5602.5602.3    | 3 | 3.09 | 1.197E+05 | 5340s    | (K)ISSGQD(K)S G/V G G L G G V S G D R(S)         | n-Neutrophilicase 5          | 82.28  | 583.9258 | 1748.72  | -0.0039  | 5.6   | 8.8  | 21563.9  | 6.74  | HUMAN | KT4832   | L14-3-3-binding protein-associated factor 2N (Fragment)               |
| 27040 | dirMS_041712_NAR_120mM_plus.5976.5976.2    | 2 | 3.09 | 1.133E+05 | S225133  | (K)SSSAKX(K)S S/A S A K/P(K)R)                   | n-Neutrophilicase 5          | 84.98  | 563.2166 | 965.501  | 159.9249 | -6.9  | 9.99 | 197316.7 | 9.58  | HUMAN | QST200   | Zinc finger CCH3 domain-containing protein 1                          |
| 27041 | dirMS_041712_NAR_120mM_plus.7658.7658.3    | 3 | 3.09 | 1.276E+05 | 5340s    | (R)IEVQQQ(R)E V/Q/G/G E F F E R(F)R)             | n-Neutrophilicase 5          | 92.77  | 469.5586 | 1406.666 | -0.0046  | -3.9  | 4.9  | 15567.5  | 8.13  | HUMAN | HDY416   | Adenylyl kinase isoenzyme 1 (Fragment)                                |
| 27042 | dirMS_041712_NAR_120mM_plus.7818.7818.3    | 3 | 3.09 | 3.352E+05 | 5340s    | (K)IQDQCE(K)K Q/L E Q G S L A A E(G)R(H)         | n-Neutrophilicase 5          | 94.83  | 463.2276 | 1387.681 | -0.013   | -9.3  | 4.25 | 55284    | 7.24  | HUMAN | GV3V21   | Protein Z-dependent protease inhibitor                                |
| 27043 | dirMS_041712_NAR_120mM_plus.9137.9137.3    | 3 | 3.09 | 4.332E+04 | K109m    | (R)KLAFLA(K)F A L V L W S W(R)G)                 | C.Carbonmethylation L-h.sau  | 102.23 | 441.2104 | 1451.531 | 203.0964 | 14.3  | 9.79 | 24958.9  | 11.08 | HUMAN | FZ2333   | Fibronectin type-III domain-containing transmembrane protein C1orf233 |
| 27044 | dirMS_041712_NAR_20mM_plus.10913.10996.2   | 2 | 3.09 | 1.128E+05 | 5340s    | (K)KLAFLV(K)A L E Y V T I K(S)                   | n-Neutrophilicase 5          | 148.33 | 468.7674 | 936.54   | -0.0125  | -13.4 | 6    | 23508.3  | 9.06  | HUMAN | F7EUA9   | Neuron navigator 3                                                    |
| 27045 | dirMS_041712_NAR_20mM_plus.11630.11630.2   | 2 | 3.09 | 9.66E+04  | T6601566 | (R)APLPIS(R)P L/P L S/P Q/P P S/P R(Q)           | n-Phosphorylated Tcbox,throp | 153.47 | 752.8363 | 1344.727 | 159.9383 | 3.7   | 9.79 | 73666    | 6.97  | HUMAN | F7EWG4   | Ubiquitin-associated protein 2                                        |
| 27046 | dirMS_041712_NAR_20mM_plus.13241.13241.3   | 3 | 3.09 | 1.638E+04 | M2224m   | (K)IVFm(K)I/V Fm K W S N D(K)                    | n-Neutrophilicase 5          | 167.75 | 466.244  | 1380.734 | 15.983   | -8.5  | 8.59 | 83300.7  | 5.78  | HUMAN | BZ7M163  | ITPBI1 protein                                                        |
| 27047 | dirMS_041712_NAR_20mM_plus.14595.14595.3   | 3 | 3.09 | 1.143E+05 | 5340s    | (R)IGEGAR(R)Q E A G(V)S/E A V L Q(R)             | n-Neutrophilicase 5          | 172.05 | 518.6131 | 1556.828 | -0.0031  | -2    | 4.25 | 33378    | 5.74  | HUMAN | Q15149   | Plectin                                                               |
| 27048 | dirMS_041712_NAR_20mM_plus.17663.17663.2   | 2 | 3.09 | 1.922E+04 | K192k    | (K)IGLEER(K)E L E R A L S J A V I A T E(K)       | n-Ubiquitin-K                | 185.93 | 850.9546 | 1586.875 | 114.0271 | -9.3  | 4.79 | 72215.4  | 5.88  | HUMAN | H3BV12   | Uncharacterized protein                                               |
| 27049 | dirMS_041712_NAR_40mM_plus.2.5892.5892.3   | 3 | 3.09 | 1.742E+04 | 5130s    | (K)VLDSGA(K)I V D S A P/I K V/P G P E T L G(R)   | n-Neutrophilicase 5          | 160.05 | 640.3668 | 1919.096 | -0.1012  | -5.3  | 6.04 | 55307.5  | 5.25  | HUMAN | FRFV99   | ATP synthase subunit beta                                             |
| 27050 | dirMS_041712_NAR_40mM_plus.2.6517.6517.2   | 2 | 3.09 | 1.154E+05 | 5340s    | (K)NAGFAE(K)G F/A G D/D/V/A P(R)                 | n-Neutrophilicase 5          | 98.67  | 428.728  | 976.448  | -0.0087  | -4.2  | 4.21 | 123097.1 | 5.83  | HUMAN | AS4E01   | Protein ankryl domain family member F                                 |
| 27051 | dirMS_041712_NAR_50mM_plus.10290.10290.3   | 3 | 3.09 | 1.915E+03 | S1888s   | (R)ISKEVQ(R)K E E V G I N T E T J S A E R(K)     | n-Neutrophilicase 5          | 120.92 | 647.303  | 1758.83  | 203.0647 | -7.5  | 4.49 | 164512   | 5.96  | HUMAN | Q14191   | Werner syndrome ATP-dependent helicase                                |
| 27052 | dirMS_041712_NAR_50mM_plus.19933.19933.3   | 3 | 3.09 | 1.939E+05 | 5340s    | (K)KLAFLA(K)K E A L E L L E I P L A A R(K)       | n-Neutrophilicase 5          | 172.6  | 574.9989 | 1722.982 | -0.0001  | -0.1  | 4.79 | 56164.6  | 6.01  | HUMAN | ER9973   | Catamer subunit beta (Fragment)                                       |
| 27053 | dirMS_041712_NAR_50mM_plus.21483.21483.3   | 3 | 3.09 | 1.148E+05 | 5340s    | (K)KJANLE(K)K A K E L D/V E V S A S Q V T P K(H) | n-Neutrophilicase 5          | 183.82 | 662.036  | 1984.096 | -0.0027  | -1.3  | 4.68 | 118312   | 7.77  | HUMAN | ESK15    | Dynamin-like 120 kDa protein, mitochondrial                           |
| 27054 | dirMS_041712_NAR_50mM_plus.27693.27693.3   | 3 | 3.09 | 1.932E+04 | S348s    | (K)KJAVAS(K)Y A A I S E P V A E A S A/S(T)-)     | n-Neutrophilicase 5          | 106.45 | 583.9631 | 1546.796 | 203.0789 | -0.3  | 4.53 | 40852.6  | 9.93  | HUMAN | P43088   | Prostaglandin F2-alpha receptor                                       |
| 27055 | dirMS_041712_NAR_50mM_plus.10171.10171.3   | 3 | 3.09 | 1.855E+05 | S155S    | (K)KJALMSS(K)A L A E S L M A R(E)                | n-Neutrophilicase 5          | 112.08 | 446.2368 | 1133.1   | 203.0863 | -5.2  | 9.6  | 108293.9 | 6.29  | HUMAN | AT2428   | OTPH100000030968                                                      |
| 27056 | dirMS_041712_NAR_50mM_plus.15213.15213.3   | 3 | 3.09 | 1.129E+05 | 5340s    | (K)KJALMSS(K)A L A E S L M A R(E)                | n-Neutrophilicase 5          | 97.1   | 415.95   | 1519.26  | -0.0001  | -1.1  | 6.19 | 52016.1  | 6.12  | HUMAN | Q74832   | Polydiphosphate-binding protein 1                                     |
| 27057 | dirMS_041712_NAR_60mM_plus.16085.16085.3   | 3 | 3.09 | 3.62E+05  | 5340s    | (K)KJMLTH(K)M T H P L V D/V T A S E R(A)         | n-Neutrophilicase 5          | 141.95 | 543.6203 | 1628.795 | -0.0025  | -1.5  | 4.65 | 141516.6 | 6.14  | HUMAN | QZJ4M9   | Protein transport protein Sec24B                                      |
| 27058 | dirMS_041712_NAR_60mM_plus.16683.16683.3   | 3 | 3.09 | 1.239E+04 | 5130s    | (R)IYRSDG(R)Y R S D G A L L L G D S S L R(C)     | n-Neutrophilicase 5          | 143.73 | 574.9718 | 1722.913 | -0.0125  | -7.2  | 8.75 | 30278.5  | 5.29  | HUMAN | B4DP38   | Methylsulfone protein 50                                              |
| 27059 | dirMS_041712_NAR_60mM_plus.5824.5824.3     | 3 | 3.09 | 1.132E+05 | S249s    | (R)IAYDIAG(R)Y A/D J A G T K D A S(K)            | n-Phosphorylated S           | 88.53  | 449.8794 | 1267.653 | 79.9708  | 3.0   | 6.01 | 175123.7 | 8.29  | HUMAN | F11388   | DNA topoisomerase 2-alpha                                             |
| 27060 | dirMS_041712_NAR_60mM_plus.6901.6901.3     | 3 | 3.09 | 1.332E+05 | 5340s    | (R)IAYDIAG(R)Y A/D J A G T K D A S(K)            | n-Phosphorylated S           | 94.97  | 452.9258 | 1512.74  | 17.014   | 6.3   | 8.29 | 32933.6  | 6.46  | HUMAN | Q12946   | Protein phosphatase 2C                                                |
| 27061 | dirMS_041712_NAR_120mM_minus.10033.10033.3 | 3 | 3.08 | 1.02E+06  | N527m    | (K)IATJHE(K)W T H F E G L V A H L Q(K)           | n-Neutrophilicase 5          | 190.28 | 465.2334 | 1190.628 | 203.058  | -15.3 | 6.69 | 193330.6 | 8.28  | HUMAN | Q4VW8B   | 1-phosphatidylinositol 4,5-bisphosphate phosphodiesterase eta-1       |
| 27062 | dirMS_041712_NAR_120mM_minus.6801.6801.2   | 2 | 3.08 | 1.40E+05  | 5340s    | (K)KJLEHYD(K)E H E V/Q/Q N F(K)                  | n-Neutrophilicase 5          | 116.33 | 440.8914 | 1320.658 | 0.0014   | 1     | 5.4  | 30169.7  | 5.02  | HUMAN | Q15691   | Microtubule-associated protein RP/EB family member 1                  |
| 27063 | dirMS_041712_NAR_120mM_minus.6801.6801.2   | 2 | 3.08 | 2.42E+05  | 5340s    | (K)KJVSQPS(K)S D S P P H A I A T(KT)             | n-Neutrophilicase 5          | 91.35  | 571.2929 | 1441.585 | -0.0063  | -5.5  | 6.71 | 226060   | 6.78  | HUMAN | Q9P2D3   | HEAT repeat-containing protein 5B                                     |
| 27064 | dirMS_041712_NAR_120mM_minus.11078.11078.2 | 2 | 3.08 | 1.45E+05  | 5340s    | (K)KJIDPPM(K)D V/P W I P L G E R(K)              | n-Neutrophilicase 5          | 157.8  | 597.8271 | 1194.648 | -0.0008  | -0.7  | 4.37 | 83690    | 4.97  | HUMAN | Q9P228   | HEAT shock protein HSP 90-beta                                        |
| 27065 | dirMS_041712_NAR_20mM_minus.11718.11718.3  | 3 | 3.08 | 2.51E+05  | 5340s    | (R)IGKAGL(R)K A L Q V E A S P T G A A K(A)       | n-Neutrophilicase 5          | 165.37 | 471.2674 | 1413.79  | 19.007   | 1.9   | 8.75 | 31718.5  | 9.12  | HUMAN | F7L174   | Glyceraldehyde-3-phosphate dehydrogenase                              |
| 27066 | dirMS_041712_NAR_30mM_minus.10167.10188.2  | 2 | 3.08 | 4.19E+05  | 5340s    | (R)IYAHVTH(R)Y A H I V H T Q C/R(R)              | C.Carbonmethylation          | 109.7  | 574.7665 | 1148.527 | -0.0028  | -2.5  | 8.75 | 14730.3  | 10.27 | HUMAN | F7E9E6   | Uncharacterized protein                                               |
| 27067 | dirMS_041712_NAR_30mM_minus.10363.10363.2  | 2 | 3.08 | 4.02E+05  | 5340s    | (R)IGQAVQ(R)Y/G Q A V A L R(A)                   | n-Neutrophilicase 5          | 115.38 | 407.2465 | 813.494  | -0.0084  | -10.3 | 9.72 | 20631.5  | 6.98  | HUMAN | DBRAX2   | C-terminal-binding protein 1 (Fragment)                               |
| 27068 | dirMS_041712_NAR_30mM_minus.12469.12469.2  | 2 | 3.08 | 1.120E+05 | M1538m   | (R)IDMALL(R)D m L A L L N A A E N(KT)            | n-Neutrophilicase 5          | 121.58 | 624.3176 | 1231.635 | 15.9928  | -1.7  | 4.37 | 42336    | 9.92  | HUMAN | Q9N7X9   | Protein FAM127B                                                       |
| 27069 | dirMS_041712_NAR_30mM_minus.1967.1967.2    | 2 | 3.08 | 3.39E+04  | 5130s    | (K)KJALMSS(K)A L A E S L M A R(E)                | n-Neutrophilicase 5          | 116.63 | 441.623  | 1163.826 | -0.0001  | -0.1  | 6.19 | 52016.1  | 6.12  | HUMAN | Q74832   | Polydiphosphate-binding protein 1                                     |
| 27070 | dirMS_041712_NAR_30mM_minus.9111.9111.2    | 2 | 3.08 | 6.32E+05  | 5340s    | (K)KJLAQLE(K)I A Q L V E A A E N(KT)             | n-Neutrophilicase 5          | 110.47 | 451.2537 | 901.499  | 0.0012   | 1.3   | 4.53 | 28965.2  | 9.43  | HUMAN | P24539   | ATP synthase subunit b, mitochondrial                                 |
| 27071 | dirMS_041712_NAR_40mM_minus.7212.7212.2    | 2 | 3.08 | 2.47E+05  | 5340s    | (R)IYAGIDG(R)Y A V D S R(S)                      | n-Neutrophilicase 5          | 116.75 | 421.7585 | 842.509  | -0.0073  | -4.0  | 5.81 | 20841.7  | 10.49 | HUMAN | F7EQU4   | Uncharacterized protein                                               |
| 27072 | dirMS_041712_NAR_50mM_minus.16111.16113.3  | 3 | 3.08 | 1.44E+05  | 5340s    | (K)KJVDLQ(K)Y V D I E L N L L M T E A(K)         | n-Neutrophilicase 5          | 116.04 | 531.9638 | 1593.885 | -0.0078  | -4.9  | 4.65 | 16381.6  | 5.83  | HUMAN | FRWVW2   | DCC-interacting protein 13-beta (Fragment)                            |
| 27073 | dirMS_041712_NAR_50mM_minus.19400.19400.3  | 3 | 3.08 | 1.131E+04 | 5130s    | (R)IYSGVLR(K)Y V S G L T Q L Q D N V F K(K)      | n-Neutrophilicase 5          | 176.05 | 538.0018 | 1164.664 | -0.0011  | -2    | 10   | 227783.5 | 6.21  | HUMAN | P15579   | Myosin-9                                                              |
| 27074 | dirMS_041712_NAR_60mM_minus.17823.17823.3  | 3 | 3.08 | 1.594E+05 | 5340s    | (R)KJVSQD(R)S V G L Q Z L V A F L A(K)           | n-Neutrophilicase 5          | 159.97 | 513.9529 |          |          |       |      |          |       |       |          |                                                                       |

|       |                                            |   |      |                  |                                                    |                                |        |          |          |          |       |      |          |             |        |                                                              |
|-------|--------------------------------------------|---|------|------------------|----------------------------------------------------|--------------------------------|--------|----------|----------|----------|-------|------|----------|-------------|--------|--------------------------------------------------------------|
| 27137 | dirMS_D41712_NAR_60mM_plus.5913.5913.3     | 3 | 3.07 | 0.108E+05 Y204y  | (KVIAYVIV)(K)V A V y V I V D E P S N K(Y)          | y-Phosphorylation Y            | 88.67  | 510.2582 | 1448.8   | 79.9055  | -3.8  | 4.37 | 91118.6  | 5.96 HUMAN  | ABND36 | Protein FAM83G                                               |
| 27138 | dirMS_D41712_NAR_60mM_plus.7919.7919.3     | 3 | 3.07 | 0.590E+05 M120mm | (KIVETVAT)(K) V V T A P I M G I H A                | mDaadad methionine-trk-like Ub | 99.57  | 439.5631 | 1186.65  | 130.0247 | -1.0  | 6.1  | 464687.9 | 5.7 HUMAN   | QBHW00 | Dynamin heavy chain 7, axonemal                              |
| 27139 | dirMS_D41712_NAR_50mM_plus.8011.8011.3     | 3 | 3.07 | 0.301E+05        | (KIVVETVAT)(K) V V T A P I M G I R F E             | mDaadad methionine-trk-like Ub | 125.45 | 499.2539 | 1480.77  | 153.9666 | -2.4  | 4.78 | 13259.1  | 4.65 HUMAN  | QWV051 | Spectrin alpha chain, non-erythrocytic 1                     |
| 27140 | dirMS_D41712_NAR_60mM_plus.8595.8595.2     | 2 | 3.07 | 0.427E+05        | (RIFUHCAR)(R) F A C S A L S L T V R N I            | mDaadad methionine-trk-like Ub | 102.73 | 624.8118 | 1248.615 | 0.001    | 0.8   | 9.75 | 23792.5  | 9.89 HUMAN  | C9Z17  | NON-POU domain-containing octamer-binding protein (Fragment) |
| 27141 | dirMS_D41712_NAR_120mM_minus.11911.11911.4 | 4 | 3.06 | 2.676E+05        | (KIKTSCPT)(K) T V K I S C E F T G D A W N A R I D  | mDaadad methionine-trk-like Ub | 119.27 | 460.021  | 1837.065 | -0.0032  | -1.8  | 9.09 | 150028.8 | 9.1 HUMAN   | E7WZ20 | Unconventional myosin-VI                                     |
| 27142 | dirMS_D41712_NAR_120mM_minus.12985.12985.3 | 3 | 3.06 | 1.197E+05        | (KIKTSCPT)(K) T V K I S C E F T G D A W R I T      | mDaadad methionine-trk-like Ub | 124.97 | 476.2347 | 1426.699 | -0.0099  | -7.7  | 6.07 | 21230    | 6.36 HUMAN  | HOY0C4 | V-type proton ATPase subunit B, brain isoform (Fragment)     |
| 27143 | dirMS_D41712_NAR_120mM_minus.13100.13100.3 | 3 | 3.06 | 1.142E+04 M72m   | (RITFTEEN)(R) F T E H S R N F V I L K I D I        | mDaadad methionine-trk-like Ub | 125.45 | 499.2539 | 1480.77  | 153.9666 | -2.4  | 4.78 | 13259.1  | 4.65 HUMAN  | FRV9F7 | Keratin, type II cytoskeletal 8 (Fragment)                   |
| 27144 | dirMS_D41712_NAR_120mM_minus.17880.17880.3 | 3 | 3.06 | 1.154E+05        | (RIAGLQK)(R) G K L D P N V L V D Q L R I C         | mDaadad methionine-trk-like Ub | 151.7  | 525.6385 | 1574.900 | -0.0004  | -0.2  | 6.79 | 23493.8  | 5.45 HUMAN  | FBV1L3 | Myosin-10                                                    |
| 27145 | dirMS_D41712_NAR_20mM_minus.10737.10737.2  | 2 | 3.06 | 0.661E+04        | (KIVNQIGS)(K) V N Q / S V T E S I Q A C L R I      | mDaadad methionine-trk-like Ub | 155.45 | 817.4099 | 1633.821 | -0.0089  | -5.4  | 5.97 | 47328.4  | 7.76 HUMAN  | P13929 | Beta-enolase                                                 |
| 27146 | dirMS_D41712_NAR_20mM_minus.13627.13627.2  | 2 | 3.06 | 1.10E+05         | (KINAVTNI)(R) S N A Y T T T S R M A L K I R I      | mDaadad methionine-trk-like Ub | 187.62 | 765.8936 | 1530.758 | 0.0219   | 1.14  | 9.99 | 48142.3  | 9.88 HUMAN  | Q15760 | Probable G-protein coupled receptor 19                       |
| 27147 | dirMS_D41712_NAR_20mM_minus.7312.7312.3    | 3 | 3.06 | 0.172E+04        | (KINAVTNI)(R) S N A Y T T T S R M A L K I R I      | mDaadad methionine-trk-like Ub | 121.03 | 511.5774 | 1532.719 | -0.0011  | -4.7  | 4.09 | 17219.2  | 9.88 HUMAN  | EP9K15 | 14-3-3 protein theta (Fragment)                              |
| 27148 | dirMS_D41712_NAR_20mM_minus.8326.8326.2    | 2 | 3.06 | 0.427E+05        | (KIVNQIGS)(K) V N Q / S V T E S I Q A C L R I      | mDaadad methionine-trk-like Ub | 139.92 | 472.1047 | 1443.877 | -0.0045  | -1.9  | 8.72 | 10815.7  | 6.03 HUMAN  | FZ2388 | HuCD135 protein chain L35                                    |
| 27149 | dirMS_D41712_NAR_20mM_minus.9841.9841.2    | 2 | 3.06 | 0.150E+05        | (KISLSELE)(K) S L E I L P E Q D A D I R F I        | mDaadad methionine-trk-like Ub | 147.83 | 643.8318 | 1286.659 | -0.0023  | -1.8  | 4.14 | 26616.1  | 5.68 HUMAN  | EP9PU0 | Epiplakin                                                    |
| 27150 | dirMS_D41712_NAR_30mM_minus.14293.14293.2  | 2 | 3.06 | 0.510E+04 M20m   | (RIJGLAEF)(R) L I L L A E P D M R I R I            | mDaadad methionine-trk-like Ub | 129.92 | 565.7971 | 1114.593 | 15.9944  | -0.4  | 4.37 | 18928.5  | 8.86 HUMAN  | H3BTQ7 | Origin recognition complex subunit 6                         |
| 27151 | dirMS_D41712_NAR_30mM_minus.5449.5449.2    | 2 | 3.06 | 0.984E+04        | (KIDSYVDG)(S) Y I V G D E A Q S R I K I            | mDaadad methionine-trk-like Ub | 83.85  | 599.7612 | 1198.522 | -0.0031  | -2.6  | 4.03 | 32616.5  | 5.18 HUMAN  | ABN176 | Actin, alpha skeletal muscle                                 |
| 27152 | dirMS_D41712_NAR_30mM_minus.5487.5487.2    | 2 | 3.06 | 0.291E+05        | (KIGGSGTA)(K) E G S T A F E V R I R I              | mDaadad methionine-trk-like Ub | 84.13  | 453.2202 | 905.432  | 0.0022   | 2.5   | 4.53 | 84108.3  | 6.39 HUMAN  | Q33944 | Transcription factor RFX4                                    |
| 27153 | dirMS_D41712_NAR_40mM_minus.8293.8293.3    | 3 | 3.06 | 0.203E+05 M35m   | (KJASGDIA)(K) A A S Q / I A M T E L P P H R I      | mDaadad methionine-trk-like Ub | 128.85 | 612.6484 | 1815.937 | 15.9936  | -0.7  | 5.32 | 12926.1  | 4.4 HUMAN   | FW7M20 | 14-3-3 protein epsilon (Fragment)                            |
| 27154 | dirMS_D41712_NAR_40mM_minus.9360.9360.3    | 3 | 3.06 | 1.596E+05 M356m  | (KJGEVVIV)(K) V G E I V V T K D D A M L K I G      | mDaadad methionine-trk-like Ub | 136.93 | 549.6354 | 1630.908 | 15.9832  | -7.1  | 4.56 | 61224.7  | 5.7 HUMAN   | P10809 | 60 kDa heat shock protein, mitochondrial                     |
| 27155 | dirMS_D41712_NAR_50mM_minus.7872.7872.3    | 3 | 3.06 | 0.588E+04 M24m   | (KIMISLGA)(K) M I S S L Q V I A D O C A R I        | mDaadad methionine-trk-like Ub | 111.92 | 522.2727 | 1548.812 | 15.9911  | -2.4  | 5.59 | 38991.8  | 5.35 HUMAN  | QB8U58 | Isoform 2 of Telomerase-binding protein EST1A                |
| 27156 | dirMS_D41712_NAR_60mM_minus.10300.10300.3  | 3 | 3.06 | 1.236E+04 M88m   | (KIDVQAK)(K) D V D E A Y M N K V E L E S R I       | mDaadad methionine-trk-like Ub | 116.03 | 605.2791 | 1797.832 | 15.9904  | -2.5  | 4.18 | 13586.1  | 4.66 HUMAN  | FRV9F7 | Keratin, type II cytoskeletal 8 (Fragment)                   |
| 27157 | dirMS_D41712_NAR_60mM_minus.12023.12023.3  | 3 | 3.06 | 1.411E+04        | (RILVYDS)(R) L V I D S Y E K D A V G A I R I       | mDaadad methionine-trk-like Ub | 126.87 | 481.9183 | 1443.737 | 0.0038   | 2.6   | 5.46 | 61733.3  | 6.3 HUMAN   | P36871 | Phosphoglucomutase-1                                         |
| 27158 | dirMS_D41712_NAR_60mM_minus.13776.13776.3  | 3 | 3.06 | 0.142E+05        | (KJADFCH)(K) A D F C J H Y H A V K I G             | mDaadad methionine-trk-like Ub | 137.43 | 432.2132 | 1294.625 | 0.0002   | 0.1   | 6.79 | 23493.8  | 5.45 HUMAN  | FBV1L3 | Myosin-10                                                    |
| 27159 | dirMS_D41712_NAR_60mM_minus.18375.18375.3  | 3 | 3.06 | 0.109E+05        | (RIJLUTLR)(R) L V L T A L H T L E R I M            | mDaadad methionine-trk-like Ub | 163.85 | 436.6046 | 1307.805 | -0.0053  | -4.1  | 6.75 | 45212.4  | 9.41 HUMAN  | Q72233 | Acetyl-CoA acetyltransferase, cytosolic                      |
| 27160 | dirMS_D41712_NAR_60mM_minus.19336.19336.3  | 3 | 3.06 | 1.156E+04        | (KJAKNEA)(K) N K I E A V F Q S L S I W A I         | mDaadad methionine-trk-like Ub | 172.08 | 529.9633 | 1587.878 | -0.0021  | -1.3  | 6.18 | 171285.3 | 7.06 HUMAN  | HO7814 | Bifunctional glutamate/praline-NHase ligase                  |
| 27161 | dirMS_D41712_NAR_60mM_minus.5347.5347.3    | 3 | 3.06 | 1.152E+04 T6231  | (RIVWVWR)(R) S V M R K P I R P R I Q I             | mDaadad methionine-trk-like Ub | 85.35  | 452.2129 | 1274.667 | 79.9567  | 7.1   | 9.6  | 143766.3 | 5.36 HUMAN  | Q33944 | Diallylcytorel kinase kappa                                  |
| 27162 | dirMS_D41712_NAR_120mM_plus.11480.11486.3  | 3 | 3.06 | 1.283E+06        | (KILGRPP)(K) G L R P G I H H S U L G D V D K I     | mDaadad methionine-trk-like Ub | 113.63 | 625.3557 | 1874.076 | -0.0234  | -12.5 | 9.99 | 63309.2  | 9.46 HUMAN  | H7BKX3 | Melanoma-associated antigen D2                               |
| 27163 | dirMS_D41712_NAR_120mM_plus.13960.13960.3  | 3 | 3.06 | 1.403E+05        | (KJGSDS)(K) W K D S D E A D V L V A I K I          | mDaadad methionine-trk-like Ub | 126.42 | 497.2584 | 1489.753 | 0.0073   | 4.9   | 4.23 | 20982.2  | 5.23 HUMAN  | Q13185 | Chromosom protein homolog 3                                  |
| 27164 | dirMS_D41712_NAR_120mM_plus.5932.5932.3    | 3 | 3.06 | 2.180E+05        | (RITKQAG)(R) K V T G Q A P P S V Y A A N K N K I G | mDaadad methionine-trk-like Ub | 83.88  | 600.3043 | 1798.900 | -0.189   | -10.5 | 9.83 | 11447.2  | 9.81 HUMAN  | Q3JF87 | Cytodrome C (Fragment)                                       |
| 27165 | dirMS_D41712_NAR_120mM_plus.9834.9834.2    | 2 | 3.06 | 0.173E+05 S7s    | (KIVNQIGS)(K) V N Q / S V T E S I Q A C L R I      | mDaadad methionine-trk-like Ub | 162.86 | 420.5417 | 1379.661 | -0.0013  | -1.3  | 8.72 | 10815.7  | 6.03 HUMAN  | Q33944 | C-type lectin-like domain family 1 (Fragment)                |
| 27166 | dirMS_D41712_NAR_20mM_plus.13595.13595.2   | 2 | 3.06 | 0.550E+04        | (KIFVGGGS)(K) R Y T G V L S D P T P E E K I        | mDaadad methionine-trk-like Ub | 116.28 | 704.8731 | 1488.758 | -0.0191  | -12.8 | 4.14 | 33782.7  | 8.78 HUMAN  | BD4D73 | Heterogeneous nuclear ribonucleoprotein D0                   |
| 27167 | dirMS_D41712_NAR_20mM_plus.14817.14817.2   | 2 | 3.06 | 0.148E+05        | (KIVSTLAP)(K) K V S T L P A P T L I C I I          | mDaadad methionine-trk-like Ub | 172.9  | 521.8283 | 1042.651 | -0.0013  | -1.3  | 8.72 | 20599.3  | 9.19 HUMAN  | Q33944 | Cathepsin D light chain (Fragment)                           |
| 27168 | dirMS_D41712_NAR_20mM_plus.15053.15053.2   | 2 | 3.06 | 0.793E+04        | (KIVYVWV)(K) V N I V I P V A I K A I               | mDaadad methionine-trk-like Ub | 172.74 | 526.3453 | 1051.687 | -0.0041  | -3.9  | 8.72 | 23287.6  | 9.64 HUMAN  | Q7E18H | Septin-9 (Fragment)                                          |
| 27169 | dirMS_D41712_NAR_20mM_plus.16007.16007.2   | 2 | 3.06 | 0.202E+05 M1385m | (KIDGGLG)(K) G G L G P M N P V L V S D P K R I T   | mDaadad methionine-trk-like Ub | 95.75  | 483.7447 | 956.75   | -0.0073  | 2.5   | 6.17 | 135979.9 | 8.72 HUMAN  | Q33944 | Zinc finger ZZ-type and EF-hand domain-containing protein 1  |
| 27170 | dirMS_D41712_NAR_40mM_plus.15310.15310.3   | 3 | 3.06 | 1.847E+03        | (KIDGGLG)(K) G G L G P M N P V L V S D P K R I T   | mDaadad methionine-trk-like Ub | 156.17 | 593.6623 | 1778.958 | 0.0142   | 8.7   | 8.75 | 23338.2  | 8.65 HUMAN  | QK6830 | Peroleucidin-2                                               |
| 27171 | dirMS_D41712_NAR_40mM_plus.6288.6288.2     | 2 | 3.06 | 1.284E+05        | (RIVSGGN)(R) V S G G N Y R N D V N P I Q I         | mDaadad methionine-trk-like Ub | 95.58  | 719.2857 | 1437.567 | -0.0024  | -1.7  | 4.21 | 17170.1  | 8.66 HUMAN  | P98179 | Putative RNA-binding protein 3                               |
| 27172 | dirMS_D41712_NAR_40mM_plus.28007.8007.2    | 2 | 3.06 | 0.333E+04        | (RISGDAQ)(R) S G G V G A F I G M N R I G I         | mDaadad methionine-trk-like Ub | 107.53 | 592.7523 | 1184.494 | 0.0038   | 3.2   | 9.47 | 18988.7  | 11.2 HUMAN  | H3BTQ7 | 60S ribosomal protein L4 (Fragment)                          |
| 27173 | dirMS_D41712_NAR_50mM_plus.10585.10585.3   | 3 | 3.06 | 1.185E+05        | (KISWFGP)(K) S W F V E N F S L E I K I             | mDaadad methionine-trk-like Ub | 122.8  | 485.9273 | 1465.763 | 0.0043   | 2.9   | 8.59 | 40694.4  | 9.71 HUMAN  | BD4D70 | Serine/threonine-protein kinase BSK2                         |
| 27174 | dirMS_D41712_NAR_50mM_plus.10930.10930.2   | 2 | 3.06 | 0.566E+05        | (KISFPAK)(K) S F P A A V L A A P I A R I G I       | mDaadad methionine-trk-like Ub | 123.8  | 443.5761 | 1328.731 | -0.0049  | -1.8  | 9.47 | 18935.5  | 11.4 HUMAN  | CV19   | Vacuolar protein sorting-associated protein 37D              |
| 27175 | dirMS_D41712_NAR_50mM_plus.11991.11991.3   | 3 | 3.06 | 1.860E+05 M654m  | (KIMSAVCS)(K) S A V S Q / D A I E D K S Q A R I T  | mDaadad methionine-trk-like Ub | 131.22 | 593.9395 | 1763.834 | 15.9699  | -14.1 | 4.56 | 79718    | 10.14 HUMAN | EP9EW0 | Ubiquitin carboxyl-terminal hydrolase 36                     |
| 27176 | dirMS_D41712_NAR_50mM_plus.12526.12526.3   | 3 | 3.06 | 1.593E+05        | (KJAVLCLG)(K) A V L F C E D S R A K I              | mDaadad methionine-trk-like Ub | 134.23 | 437.2325 | 1309.682 | 0.0009   | 0.7   | 6.11 | 22956    | 8.8 HUMAN   | EP9K25 | Cofilin-1                                                    |
| 27177 | dirMS_D41712_NAR_50mM_plus.14132.14132.3   | 3 | 3.06 | 0.136E+05        | (KIDGNVA)(K) I G N N A A L P G I V H R I R I       | mDaadad methionine-trk-like Ub | 142.23 | 482.2828 | 1444.838 | -0.0035  | -2.1  | 9.75 | 19338.9  | 5.33 HUMAN  | E7E059 | tRNA-splicing ligase RibC homolog                            |
| 27178 | dirMS_D41712_NAR_50mM_plus.16007.16007.2   | 2 | 3.06 | 1.286E+05 M172m  | (KIDGGLG)(K) G G L G P M N P V L V S D P K R I T   | mDaadad methionine-trk-like Ub | 119.1  | 516.9017 | 1460.821 | 95.9607  | 11.7  | 8.18 | 20471.7  | 8.72 HUMAN  | Q33944 | Protein C1                                                   |
| 27179 | dirMS_D41712_NAR_50mM_plus.8594.8594.3     | 3 | 3.06 | 1.810E+04        | (KINSDAE)(K) N S I D S D L V P A E K A N V K I C   | mDaadad methionine-trk-like Ub | 112.2  | 567.2803 | 1699.85  | 0.0046   | 2.1   | 4.32 | 19439.5  | 4.97 HUMAN  | BSM1D7 | Chromosom protein homolog 1 (Fragment)                       |
| 27180 | dirMS_D41712_NAR_50mM_plus.2894.8914.3     | 3 | 3.06 | 1.272E+05        | (KITAVDCR)(K) T A V C D P P R L G M I K I          | mDaadad methionine-trk-like Ub | 114.72 | 442.9121 | 1326.72  | 0.0019   | 1.4   | 8.41 | 50199.4  | 4.75 HUMAN  | ABNNZ2 | Tubulin beta-8 chain-like protein LOC203324                  |
| 27181 | dirMS_D41712_NAR_50mM_plus.13764.13764.3   | 3 | 3.06 | 1.408E+05        | (KISGFLAG)(K) S G L A G D Q R I Q V R I            | mDaadad methionine-trk-like Ub | 128.47 | 473.2654 | 1417.78  | 0.0019   | 1.3   | 8.31 | 67933    | 6.08 HUMAN  | P26038 | Moesin                                                       |
| 27182 | dirMS_D41712_NAR_50mM_plus.16075.16075.3   | 3 | 3.06 | 1.157E+05        | (RISAPLQ)(R) L N L V D T V R I T                   | mDaadad methionine-trk-like Ub | 141.2  | 483.5863 | 1288.747 | -0.003   | -2.5  | 9.6  | 8753.7   | 9.67 HUMAN  | Q2P446 | Plakophilin-3                                                |
| 27183 | dirMS_D41712_NAR_60mM_plus.16485.16485.3   | 3 | 3.06 | 0.703E+05        | (KISPVFLK)(S) P V Q F E T D H L V K I T I          | mDaadad methionine-trk-like Ub | 142.73 | 485.5776 | 1463.717 | 0.0017   | 1.2   | 12.3 | 25381.9  | 10.49 HUMAN | EP9D07 | 40S ribosomal protein S2                                     |
| 27184 | dirMS_D41712_NAR_60mM_plus.18444.18444.3   | 3 | 3.06 | 0.135E+04        | (KISPVTLTI)(K) S P V T T L L E C M V K I R I       | mDaadad methionine-trk-like Ub | 153.65 | 472.5788 | 1415.702 | 0.0197   | 13.9  | 6.47 | 142137.5 | 9.17 HUMAN  | E7ENU4 | Double-stranded RNA-specific adenosine deaminase             |
| 27185 | dirMS_D41712_NAR_60mM_plus.7884.7884.3     | 3 | 3.06 | 1.116E+04        | (RILQRELG)(R) Q R E L Q S L S Q R I R I            | mDaadad methionine-trk-like Ub | 100.10 | 451.2595 | 1357.755 | 0.0093   | 6.9   | 9.6  | 110876.7 | 5.76 HUMAN  |        |                                                              |

|       |                                            |   |      |           |                                                         |        |          |          |          |       |      |          |       |       |           |                                                                                   |
|-------|--------------------------------------------|---|------|-----------|---------------------------------------------------------|--------|----------|----------|----------|-------|------|----------|-------|-------|-----------|-----------------------------------------------------------------------------------|
| 27246 | dirMS_041712_NAR_120mM_plus.8578.8578.2    | 2 | 3.04 | 1.166E+05 | (RLIHRRNE(R)R I R N E F P M(V)C)                        | 98.05  | 608.3168 | 1215.642 | -0.0152  | -12.5 | 9.61 | 138192.7 | 6.56  | HUMAN | CSDG0     | Protein diaphanous homolog 3                                                      |
| 27247 | dirMS_041712_NAR_20mM_plus.10542.10542.2   | 2 | 3.04 | 0.105E+05 | (RIALGPR(R)A/V/L/I/G/P/P G A/G K(G))                    | 144.92 | 490.2992 | 979.593  | -0.0024  | -2.4  | 8.8  | 4460.2   | 8.14  | HUMAN | RWP1F1    | Adenylate kinase 2, mitochondrial                                                 |
| 27248 | dirMS_041712_NAR_20mM_plus.13562.13562.2   | 2 | 3.04 | 1.935E+04 | (RKLREKVE(R)R L I R L E R I R I)                        | 91.57  | 255.2855 | 911.242  | 0.0022   | 1.8   | 9.9  | 54996.3  | 6.56  | HUMAN | WAF4      | Waf4, tumorigenesis, kunitz and NTR domain-containing protein 2                   |
| 27249 | dirMS_041712_NAR_20mM_plus.8600.8600.2     | 2 | 3.04 | 0.629E+04 | (RLDAKPEPR(R) D A E A P R P P T Q E(A)A(E))             | 125.63 | 376.743  | 1491.744 | -0.0024  | -1.7  | 4.14 | 52413.9  | 7.33  | HUMAN | B4E363    | Phenylalanine-tRNA ligase alpha subunit                                           |
| 27250 | dirMS_041712_NAR_30mM_plus2.16894.16894.2  | 2 | 3.04 | 1.124E+04 | (-I)MVGCA(R) -I)M V G C A/K G G A/K(E)R(E)              | 140.73 | 568.2831 | 1035.571 | -0.0121  | -1.0  | 9.9  | 20318.6  | 5.45  | HUMAN | BAD1P9    | BTB/POZ domain-containing protein CCT2D0                                          |
| 27251 | dirMS_041712_NAR_30mM_plus2.20827.20827.2  | 2 | 3.04 | 0.102E+05 | (R)D(W)M(R) R D W(V)A/N F E(K)H)                        | 163.85 | 525.767  | 1050.526 | 0.0013   | 1.2   | 4.37 | 61018.6  | 9.44  | HUMAN | BAD1W8    | Probable ATP-dependent RNA helicase DDX5                                          |
| 27252 | dirMS_041712_NAR_30mM_plus2.4551.4551.2    | 2 | 3.04 | 0.336E+05 | (R)S(T)SQR(R)S T Y(T)S F G S(V)R(L)                     | 71.57  | 255.2855 | 911.242  | 0.0022   | 1.8   | 8.46 | 15288.7  | 16.15 | HUMAN | FRV2C5    | Keratin, type II cytoskeletal 8 (Fragment)                                        |
| 27253 | dirMS_041712_NAR_40mM_plus2.13926.13926.3  | 3 | 3.04 | 1.386E+05 | (R)Q(V)FGEA(R)R V V F G A E T K P Q S(I) F F I A A(K)F) | 147.62 | 636.0176 | 1906.043 | -0.005   | -2.6  | 8.59 | 32005.8  | 5.88  | HUMAN | CSH191    | Cathepsin D light chain (Fragment)                                                |
| 27254 | dirMS_041712_NAR_40mM_plus2.5927.5927.2    | 2 | 3.04 | 0.188E+05 | (K)M(M)YQ(K)M(M)Y(Q)R(Q)                                | 93.85  | 422.1766 | 843.349  | -0.0028  | -3.4  | 5.59 | 38299.3  | 5.27  | HUMAN | OY9266    | Nuclear migration protein nudc                                                    |
| 27255 | dirMS_041712_NAR_40mM_plus2.6079.6079.3    | 3 | 3.04 | 1.242E+04 | (R)R(S)VSPS(R) R R S V S P C/S N V S R(E) L)            | 94.68  | 515.558  | 1464.686 | 79.9735  | 6.46  | 9.32 | 99885.2  | 12.36 | HUMAN | IL1812    | Serine/arginine repetitive matrix protein 2 (Fragment)                            |
| 27256 | dirMS_041712_NAR_40mM_plus2.8900.8900.2    | 2 | 3.04 | 0.139E+05 | (R)G(Y)SPTT(R)R G Y S P T T T F A R(E) R)               | 114.9  | 366.7672 | 1133.527 | 0.0002   | 0.2   | 6    | 23901.9  | 5.28  | HUMAN | IL1319    | Actin, cytoplasmic 2, N-terminally processed (Fragment)                           |
| 27257 | dirMS_041712_NAR_50mM_plus2.13906.13906.3  | 3 | 3.04 | 1.984E+05 | (R)K(L)STLSTL(R)R K L S T L S T L D L Q E L E R(E) L)   | 138.6  | 631.3272 | 1831.965 | -0.0025  | -1.4  | 4.18 | 11906.2  | 6.08  | 1     | 60812.1   | Integrator complex subunit 3                                                      |
| 27258 | dirMS_041712_NAR_50mM_plus2.7640.7640.3    | 3 | 3.04 | 1.496E+04 | (K)S(R)SHD(K)S R H D S I T G L V(K) K(K)                | 105.97 | 468.5732 | 1200.633 | 203.0719 | -5.3  | 8.49 | 49011.6  | 7.89  | HUMAN | AN6117    | E3 ubiquitin-protein ligase TRIM31                                                |
| 27259 | dirMS_041712_NAR_50mM_plus2.8275.8275.3    | 3 | 3.04 | 0.128E+05 | (K)Q(L)A(V)E(K)Q L A V A E A K P P E A P(K)G)           | 109.72 | 478.9337 | 1434.795 | -0.0086  | -6    | 6.14 | 24364.9  | 9.64  | HUMAN | HYD10     | Methionine-tRNA ligase, cytoplasmic (Fragment)                                    |
| 27260 | dirMS_041712_NAR_50mM_plus2.8509.8509.3    | 3 | 3.04 | 1.169E+05 | (K)K(D)PFAI(K)K D P P A E I H G L N L A(K)K(K)          | 111.82 | 546.9401 | 1435.718 | 203.8882 | 5.4   | 5.44 | 16128.1  | 9.43  | HUMAN | HC7375    | WD repeat-containing and planar cell polarity effector protein homolog (Fragment) |
| 27261 | dirMS_041712_NAR_50mM_plus2.9142.9142.3    | 3 | 3.04 | 0.223E+05 | (K)I(L)A(Q)E(K)I(L)A(Q)E R Y D D N L A A A(M)K(A)       | 114.55 | 616.2714 | 1811.825 | 151.9331 | -1    | 4.32 | 28196    | 4.76  | HUMAN | FS146-3   | 14-3-3 protein beta/alpha                                                         |
| 27262 | dirMS_041712_NAR_120mM_minus.10593.10593.2 | 2 | 3.03 | 0.685E+05 | (K)K(I)KAP(E)K(I)K(I)A(V)P P E R(K)                     | 111.57 | 518.8303 | 1036.651 | 0.002    | 1.9   | 8.75 | 32616.5  | 4.19  | 1     | 875       | Actin, alpha skeletal muscle                                                      |
| 27263 | dirMS_041712_NAR_120mM_minus.17019.17019.4 | 4 | 3.03 | 0.685E+05 | (K)H(L)EINP(K)K(L)E(V)N P D S H V I S I L T R(Q)        | 146.87 | 447.4904 | 1786.945 | -0.0049  | -2.7  | 5.27 | 85057.6  | 4.94  | HUMAN | PO7900    | Heat shock protein HSP 90-alpha                                                   |
| 27264 | dirMS_041712_NAR_120mM_minus.4360.4360.2   | 2 | 3.03 | 0.395E+05 | (K)H(Y)MAG(K)R(V)I)E)M(Q)E(V)A(Q)K                      | 72.92  | 489.2307 | 977.451  | 0.0032   | 3     | 6.75 | 39099.6  | 4.32  | HUMAN | RW8VC5    | Reticulocalbin-2                                                                  |
| 27265 | dirMS_041712_NAR_120mM_minus.7964.7964.3   | 3 | 3.03 | 1.485E+05 | (R)M(G)M(L)R(M)R G L G D M D V T V T R(Q)               | 97.23  | 463.2365 | 1371.698 | 15.9566  | 1.2   | 9.37 | 26720.1  | 7.18  | HUMAN | QS2984    | Isoform 4 of Transcription factor IIB 90 kDa subunit                              |
| 27266 | dirMS_041712_NAR_120mM_minus.9865.9865.3   | 3 | 3.03 | 1.945E+04 | (R)S(J)AACE(R)S R A E A E S Y(M)Q)K(Y)K(Y)              | 160.07 | 471.5662 | 1412.684 | 0.0021   | 0.1   | 5.86 | 37296.3  | 5.3   | HUMAN | FBV464    | Keratin, type II cytoskeletal 8                                                   |
| 27267 | dirMS_041712_NAR_20mM_minus.11833.11833.3  | 3 | 3.03 | 0.326E+05 | (K)T(L)E(V)N P M I L V E M P m I T E V E R(L)           | 108.88 | 522.2651 | 1345.678 | 219.0757 | 0.9   | 4.5  | 85381.1  | 5     | HUMAN | ON9R17    | Protocadherin beta-16                                                             |
| 27268 | dirMS_041712_NAR_20mM_minus.8906.8906.2    | 2 | 3.03 | 0.870E+05 | (K)M(D)YNS(K)M(D)Y N S F C A/V)T R(I)T)                 | 137.63 | 722.8406 | 1444.689 | -0.015   | -10.4 | 5.59 | 15427.3  | 6.98  | HUMAN | OBZ2F3    | Isoform 3 of Probable G-protein coupled receptor 116                              |
| 27269 | dirMS_041712_NAR_20mM_minus.14107.14107.2  | 2 | 3.03 | 0.175E+05 | (R)P(V)P(L)R(V)P(V)P(L)E A A R(K)                       | 129.9  | 478.6231 | 945.515  | 0.0037   | 1.9   | 5.97 | 29654.8  | 9.49  | HUMAN | CSJ930    | Regulator of chromosome condensation (Fragment)                                   |
| 27270 | dirMS_041712_NAR_30mM_minus.15181.15181.2  | 2 | 3.03 | 0.461E+04 | (R)S(E)QTT(R)S(E)Q T T A R M(R)                         | 136.38 | 523.3014 | 1229.598 | 15.9577  | 1.8   | 6    | 42831.5  | 4.86  | HUMAN | HCC19850A | Isoform CRA_1                                                                     |
| 27271 | dirMS_041712_NAR_30mM_minus2.16873.16873.2 | 2 | 3.03 | 0.169E+05 | (R)S(L)E(A)R(R)S L E A/A)A/D A/E Q R(G)                 | 144.92 | 672.8404 | 1344.675 | -0.0019  | -1.4  | 4.14 | 56607.4  | 5.37  | HUMAN | FBV084    | Keratin, type II cytoskeletal 8                                                   |
| 27272 | dirMS_041712_NAR_30mM_minus2.18105.18105.2 | 2 | 3.03 | 0.500E+05 | (R)R(S)L(L)T(R)R(S)S L L T E L(K)E)                     | 153.77 | 467.2718 | 933.536  | 0        | -0.1  | 8.75 | 376926.5 | 4.99  | HUMAN | HY5W0     | E3 ubiquitin-protein ligase HUWE1 (Fragment)                                      |
| 27273 | dirMS_041712_NAR_30mM_minus2.18770.18770.2 | 2 | 3.03 | 0.161E+05 | (K)A(D)G(L)C(D)G L L Q D G L F E R(K)                   | 157.23 | 532.7918 | 1064.581 | -0.0046  | -4.3  | 5.88 | 70204.6  | 9.22  | HUMAN | HT87A9    | ER membrane protein complex subunit 1 (Fragment)                                  |
| 27274 | dirMS_041712_NAR_30mM_minus2.14404.14404.2 | 2 | 3.03 | 0.204E+05 | (R)P(L)A(Q)K(I)K P L A(Q)K I V D V P T A V L(K)K        | 109.47 | 489.2307 | 977.451  | 0.0032   | 3     | 6.75 | 42357.6  | 6.01  | HUMAN | FRV2F5    | Glycogen synthase kinase-3 beta                                                   |
| 27275 | dirMS_041712_NAR_40mM_minus2.7493.7493.2   | 2 | 3.03 | 1.182E+05 | (K)M(Y)NR(K)M(Y)N R A E S I E A S(K)                    | 120.23 | 552.7111 | 1088.541 | 15.9945  | 0.4   | 4.78 | 38024.6  | 11.22 | HUMAN | AK64      | Putative UPOF607 protein ENSP0000332738                                           |
| 27276 | dirMS_041712_NAR_50mM_minus2.8003.8003.3   | 3 | 3.03 | 1.121E+05 | (K)T(V)A(C)R(K)T V I A C R(K)T V D P P R K(G)K(M)       | 112.2  | 442.9126 | 1326.72  | 0.0034   | 2.6   | 8.41 | 50199.4  | 4.75  | HUMAN | AN6N22    | Tubulin beta-8 chain-like protein LOC260334                                       |
| 27277 | dirMS_041712_NAR_50mM_minus2.7497.7497.3   | 3 | 3.03 | 1.137E+04 | (R)K(N)V(L)C(R)R N V L V C G N R P/P D L F A R(M)       | 157.13 | 571.9695 | 1713.911 | -0.0165  | -9.7  | 8.75 | 34425.5  | 9.08  | HUMAN | PS2193    | Transcription elongation factor A protein 3                                       |
| 27278 | dirMS_041712_NAR_50mM_minus2.19216.19216.3 | 3 | 3.03 | 0.104E+05 | (R)S(L)A(E)S(L)S(L)A(E)S L S(L)A(E)S L S(L)A(E)S(L)     | 112.14 | 548.1523 | 1554.323 | 0.0042   | -0.1  | 6.01 | 84937.8  | 6.01  | HUMAN | FRV2F5    | Complex protein 1 subunit beta                                                    |
| 27279 | dirMS_041712_NAR_60mM_minus.5599.5599.3    | 3 | 3.03 | 1.163E+04 | (-I)M(R)P(L)E(I)M R P L T Y/E L Y E R V M F E R(K)      | 92.07  | 650.3066 | 1895.935 | 79.9699  | 1.8   | 4.95 | 14264.3  | 8.83  | HUMAN | IQJLV7    | 60S ribosome subunit biogenesis protein NP17 homolog                              |
| 27280 | dirMS_041712_NAR_60mM_minus.6048.6048.3    | 3 | 3.03 | 0.154E+05 | (K)S(A)W(D)K(S)A W D O P S L P E A V(K)K                | 92.13  | 476.895  | 1428.675 | -0.0049  | -3.5  | 4.37 | 214673.3 | 8.33  | HUMAN | ETN7A4    | Exophilin-1                                                                       |
| 27281 | dirMS_041712_NAR_60mM_minus.7964.7964.3    | 3 | 3.03 | 1.180E+05 | (K)E(A)K(Q)K E A V S K Q D V N L V N A(V)K              | 104.10 | 496.2639 | 1486.786 | -0.0089  | -6    | 6.17 | 57391.2  | 6.13  | HUMAN | DA3175    | D-3-phosphoglycerate dehydrogenase                                                |
| 27282 | dirMS_041712_NAR_60mM_minus.9263.9263.3    | 3 | 3.03 | 0.883E+04 | (R)P(L)E(V)R(I)E C P L M T P S L V(K)K                  | 111.42 | 456.229  | 1147.603 | 219.0967 | -3.3  | 6.1  | 39608.8  | 9.29  | HUMAN | ML9N39    | Melanophilin (Fragment)                                                           |
| 27283 | dirMS_041712_NAR_120mM_plus.16879.16879.4  | 4 | 3.03 | 1.167E+04 | (R)P(L)E(V)R(I)E C P L M T P S L V(K)K                  | 114.92 | 489.2725 | 1064.581 | -0.0003  | -0.1  | 6.07 | 20945.4  | 4.53  | HUMAN | BT215     | E3 ubiquitin-protein ligase RNF14                                                 |
| 27284 | dirMS_041712_NAR_120mM_plus.23582.23582.4  | 4 | 3.03 | 2.165E+05 | (R)I(A)H(L)E(R)I A Y E L L F L C G M V A(K)D(K)         | 178.22 | 492.7854 | 1952.129 | 15.9909  | -2.1  | 8.43 | 19924.8  | 9.99  | HUMAN | FRU211    | 40S ribosomal protein S10                                                         |
| 27285 | dirMS_041712_NAR_120mM_plus.3569.3569.3    | 3 | 3.03 | 2.385E+06 | (R)E(I)E(R)E R E E I O/E I E E I)                       | 59.63  | 418.1852 | 1049.475 | 203.0665 | -10.3 | 4.5  | 31216.1  | 4.95  | HUMAN | FRW810    | CDK5 regulatory subunit-associated protein 2                                      |
| 27286 | dirMS_041712_NAR_120mM_plus.9333.9333.3    | 3 | 3.03 | 1.595E+05 | (R)N(W)D(N)R Y D R I V G(A)F C R(K)M                    | 103.37 | 493.5549 | 1478.648 | 0.002    | 1.4   | 8.49 | 34421.3  | 6.44  | HUMAN | PI5924    | Desmoplakin                                                                       |
| 27287 | dirMS_041712_NAR_20mM_plus.16788.16788.3   | 3 | 3.03 | 0.326E+05 | (R)P(L)E(V)R(I)E C P L M T P S L V(K)K                  | 115.14 | 548.1523 | 1554.323 | 0.0042   | -0.1  | 6.01 | 84937.8  | 6.01  | HUMAN | FRV2F5    | Miosis arrest female protein 1                                                    |
| 27288 | dirMS_041712_NAR_20mM_plus.8463.8463.3     | 3 | 3.03 | 1.329E+05 | (R)I(N)D(Q)S(R)R I D D S G V R A D V M P R(K)N          | 110.08 | 527.5594 | 1361.684 | 219.0785 | 2.6   | 5.96 | 46727.6  | 9.32  | HUMAN | OQ6235    | Transmembrane protein serine 11D                                                  |
| 27289 | dirMS_041712_NAR_30mM_plus2.10784.10784.2  | 2 | 3.03 | 0.101E+06 | (R)G(A)V(V)R(C)I A V L F V F K(M)                       | 109.88 | 455.2298 | 909.45   | 0.0025   | 2.7   | 6    | 77799.7  | 9.09  | HUMAN | PS2272    | Heterogeneous nuclear ribonucleoprotein M                                         |
| 27290 | dirMS_041712_NAR_30mM_plus2.13111.13111.2  | 2 | 3.03 | 0.431E+05 | (R)I(G)A(T)L(R)I G A T V L R I R(I)                     | 121.83 | 429.7522 | 858.504  | -0.0072  | -4.8  | 5.84 | 43706.2  | 5.85  | HUMAN | Q5V2M2    | Ras-related GTP-binding protein B                                                 |
| 27291 | dirMS_041712_NAR_30mM_plus2.20878.20878.2  | 2 | 3.03 | 0.293E+05 | (K)S(F)P(R)K(S)F P R A P D V L V R(I)                   | 164.35 | 478.3092 | 957.613  | -0.002   | -2.1  | 8.75 | 25445.8  | 5.52  | HUMAN | ABW850    | Lactacin dehydrogenase (Fragment)                                                 |
| 27292 | dirMS_041712_NAR_30mM_plus2.4518.4518.2    | 2 | 3.03 | 0.250E+05 | (K)S(P)A(M)K(S)A P P A M V D R(L)                       | 73     | 471.6876 | 862.409  | 79.9592  | 7.6   | 5.55 | 66838.5  | 6.6   | HUMAN | QNS584    | Tetratricopeptide repeat protein 30C                                              |
| 27293 | dirMS_041712_NAR_30mM_plus2.6822.6822.2    | 2 | 3.03 | 0.421E+05 | (K)G(D)A(G)K(G)G D A G E N E G P(K)G)                   | 90.4   | 422.6944 | 844.38   | 0.002    | 2.4   | 4.37 | 63751.6  | 8.36  | HUMAN | ABWV05    | Collagen-like Alzheimer amyloid plaque component                                  |
| 27294 | dirMS_041712_NAR_30mM_plus2.9336.9336.2    | 2 | 3.03 | 0.137E+05 | (R)S(L)A(Q)T(R)S L A Q A T T A S P A R(A)               | 103.53 | 501.2717 | 1010.537 | -0.0013  | -1.3  | 9.47 | 10049.4  | 10.42 | HUMAN | G3V4N9    | Vasohibin-1                                                                       |
| 27295 | dirMS_041712_NAR_30mM_plus2.9716.9716.2    | 2 | 3.03 | 0.665E+05 | (K)I(Q)W(T)K(I)Q T W T W G D R(I)                       | 104.97 | 561.7585 | 1122.515 | 0.0101   | 1.9   | 5.84 | 25868    | 9.48  | HUMAN | QD9116    | Thymocyte nuclear protein 1                                                       |
| 27296 | dirMS_041712_NAR_40mM_plus2.10680.10680.3  | 3 | 3.03 | 0.695E+04 | (R)I(A)A(A)A(L)R I A A A A A L Q Q L E L R E L R(K)     | 127.45 | 640.991  | 1840.996 | 0.002    |       |      |          |       |       |           |                                                                                   |

|       |                                             |   |      |   |          |        |                                                  |                                |        |          |          |          |       |      |          |       |       |        |                                                                                  |
|-------|---------------------------------------------|---|------|---|----------|--------|--------------------------------------------------|--------------------------------|--------|----------|----------|----------|-------|------|----------|-------|-------|--------|----------------------------------------------------------------------------------|
| 27355 | dirMS_041712_NAR_20mM_minus.12452.12452.3   | 3 | 3.01 | 1 | 8.32E+04 | 5587s  | (K)VVSTP(K)KVVSTPGK(V)VPVPSG(K)V                 | s-Phosphorylated S             | 172.67 | 511.6052 | 1452.842 | 79.959   | -4.8  | 10   | 103196.3 | 8.73  | HUMAN | Q722X8 | G protein-regulated inducer of neurite outgrowth 1                               |
| 27356 | dirMS_041712_NAR_30mM_minus.18952.18952.2   | 2 | 3.01 | 0 | 1.91E+05 |        | (K)CFSVLGI(K)E(F)FS(V)G(F)C(K)S                  | C-Carbamoylmethylation         | 157.42 | 559.2673 | 1117.517 | 0.0104   | 9.3   | 8.75 | 83737.6  | 5.55  | HUMAN | P13010 | X-ray repair cross-complementing protein 5                                       |
| 27357 | dirMS_041712_NAR_30mM_minus.2.6586.6586.2   | 2 | 3.01 | 0 | 1.67E+05 | 9690mD | (R)ISSHRI(R)E(S)H(R)Q                            | n-N-acetylglucosamine (N)      | 90.17  | 475.7203 | 747.363  | 203.0702 | -9.7  | 4.53 | 402433.2 | 6.06  | HUMAN | K7EYV1 | Titin                                                                            |
| 27358 | dirMS_041712_NAR_30mM_minus.2.8825.8825.2   | 2 | 3.01 | 0 | 5.08E+05 | 5365s  | (R)YGVSTI(R)G(V)S(I)T(L)S(G)K(S)                 | s-Phosphorylated S             | 101.4  | 566.7699 | 1052.574 | 79.959   | -6.4  | 8.75 | 52585.6  | 5.66  | HUMAN | EP9R76 | Pancreatic lipase-related protein 1                                              |
| 27359 | dirMS_041712_NAR_40mM_minus.2.12765.12765.3 | 3 | 3.01 | 0 | 8.16E+03 |        | (K)EAPCVI(K)E(A)P(C)V(L)N(V)P(D)G(H)T(K)E        | C-Carbamoylmethylation         | 158.37 | 571.6284 | 1712.868 | 0.003    | 1.8   | 5.32 | 172185.3 | 7.06  | HUMAN | P07814 | Bifunctional glutamate/proline-tRNA ligase                                       |
| 27360 | dirMS_041712_NAR_40mM_minus.2.8232.8232.3   | 3 | 3.01 | 0 | 2.47E+05 | M35m   | (K)JAASDI(A)K(A)S(D)I(A)m(T)E(L)P(P)T(H)P(I)R(L) | m-Diiodo methionine            | 128.65 | 612.6484 | 1819.937 | 15.9936  | -0.7  | 5.32 | 12926.1  | 4.4   | HUMAN | K7EM20 | 14-3-3 protein epsilon (Fragment)                                                |
| 27361 | dirMS_041712_NAR_50mM_minus.2.13156.13156.3 | 3 | 3.01 | 1 | 1.01E+05 |        | (R)TEAME(R)T(E)M(E)N(E)F(V)I(L)K(D)              |                                | 142.92 | 484.2621 | 1480.772 | 0.0002   | 0.1   | 4.78 | 13588.1  | 4.65  | HUMAN | FRV97  | Keratin, type II cytoskeletal 8 (Fragment)                                       |
| 27362 | dirMS_041712_NAR_50mM_minus.2.15702.15702.3 | 3 | 3.01 | 0 | 1.01E+05 |        | (I)MAPSTA(I)M(A)P(S)T(A)V(S)V(S)D(S)K(V)         |                                | 157.95 | 497.9267 | 1491.772 | -0.0068  | -4.5  | 5.59 | 36888.4  | 9.6   | HUMAN | 61AHC5 | PHO finger protein 21B                                                           |
| 27363 | dirMS_041712_NAR_50mM_minus.2.8518.8518.3   | 3 | 3.01 | 1 | 4.13E+04 | M88m   | (K)JALDmI(K)K(L)D(D)m(I)S(T)K(K)                 | m-Diiodo methionine            | 116.17 | 417.5602 | 1234.671 | 15.9949  | 0     | 6    | 56186.7  | 5.47  | HUMAN | B4DU8H | T-complex protein 1 subunit gamma                                                |
| 27364 | dirMS_041712_NAR_60mM_minus.2.18068.18068.3 | 3 | 3.01 | 0 | 7.10E+03 |        | (R)CRPQEI(R)C(R)C(Q)E(D)T(G)W(W)F(P)N(K)A        | C-Carbamoylmethylation         | 161.5  | 649.3238 | 1945.959 | -0.002   | -1.1  | 6.07 | 558007.1 | 5.44  | HUMAN | PS8107 | Epiplakin                                                                        |
| 27365 | dirMS_041712_NAR_60mM_minus.2.7121.7121.3   | 3 | 3.01 | 1 | 2.74E+05 |        | (R)IVGVGR(R)V(D)G(F)V(V)S(E)N(D)T(K)V            |                                | 97.95  | 502.2642 | 1504.785 | -0.0073  | -4.8  | 4.56 | 48057    | 5.34  | HUMAN | PD5783 | Keratin, type I cytoskeletal 18                                                  |
| 27366 | dirMS_041712_NAR_60mM_minus.2.8841.8841.3   | 3 | 3.01 | 1 | 1.02E+05 |        | (K)SAGVGG(K)S(A)V(G)F(D)Q(E)K(T)K(H)             |                                | 108.85 | 477.2381 | 1429.696 | 0.004    | 2.8   | 5.79 | 25153.2  | 6.6   | HUMAN | HTC134 | Src substrate cortactin (Fragment)                                               |
| 27367 | dirMS_041712_NAR_60mM_minus.2.9030.9030.3   | 3 | 3.01 | 0 | 6.62E+05 |        | (R)ADGKPK(R)A(D)G(K)P(Y)S(G)V(E)A(R)V            |                                | 111.03 | 449.5563 | 1346.67  | -0.0156  | -11.6 | 6.11 | 129136.9 | 9.58  | HUMAN | K7EP14 | Cartilage intermediate layer protein 2 C1                                        |
| 27368 | dirMS_041712_NAR_120mM_plus.20657.20657.4   | 4 | 3.01 | 2 | 3.87E+05 |        | (R)TLAEIA(R)T(L)A(E)A(K)V(E)L(D)N(M)P(L)R(G)K(Q) |                                | 161.73 | 500.2814 | 1998.105 | -0.0015  | -0.7  | 5.85 | 23729.5  | 9.89  | HUMAN | C9L27  | Non-POU domain-containing octamer-binding protein (Fragment)                     |
| 27369 | dirMS_041712_NAR_120mM_plus.8389.8389.2     | 2 | 3.01 | 0 | 3.77E+04 |        | (R)HSVGV(R)H(S)V(G)V(V)G(R)S                     |                                | 97.47  | 462.2744 | 923.542  | -0.0006  | -0.7  | 9.75 | 73399.3  | 6.86  | HUMAN | Q92945 | Far upstream element-binding protein 2                                           |
| 27370 | dirMS_041712_NAR_120mM_plus.9431.9431.2     | 2 | 3.01 | 1 | 5.81E+05 |        | (K)RLREGI(K)E(R)L(E)F(V)K(T)                     |                                | 102.77 | 489.2725 | 977.542  | -0.0037  | -3.8  | 6.24 | 132819.4 | 9.48  | HUMAN | C9N1G1 | RNA nucleotidase 1 homolog                                                       |
| 27371 | dirMS_041712_NAR_20mM_plus.13611.13611.2    | 2 | 3.01 | 0 | 5.50E+04 |        | (K)IFVGGI(K)I(F)V(G)L(S)P(D)T(J)E(E)K(I)         |                                | 165.28 | 744.8731 | 1488.758 | -0.0191  | -12.8 | 4.14 | 33782.7  | 8.78  | HUMAN | B4DTC3 | Heterogeneous nuclear ribonucleoprotein D0                                       |
| 27372 | dirMS_041712_NAR_20mM_plus.17205.17205.2    | 2 | 3.01 | 0 | 1.45E+04 |        | (R)LLALNS(L)L(L)A(L)N(S)L(Y)S(P)K(I)             |                                | 189.98 | 609.8583 | 1218.709 | 0.0001   | 0.1   | 8.59 | 470342.8 | 6.83  | HUMAN | E7EUV0 | DNA-dependent protein kinase catalytic subunit                                   |
| 27373 | dirMS_041712_NAR_20mM_plus.6761.6761.2      | 2 | 3.01 | 0 | 2.15E+05 | M132m  | (R)DmVIGI(R)D(m)V(G)A(Q)T(G)S(K)T                | m-Diiodo methionine            | 112.18 | 590.2864 | 1163.573 | 15.993   | -1.6  | 5.84 | 73202    | 9.19  | HUMAN | C9M1U5 | Probable ATP-dependent RNA helicase DDX17                                        |
| 27374 | dirMS_041712_NAR_20mM_plus.8861.8861.2      | 2 | 3.01 | 0 | 8.98E+05 | M239m  | (K)ETTLAP(K)E(Y)A(J)A(P)S(T)H(K)I                | m-Diiodo methionine            | 132.37 | 589.309  | 1161.618 | 15.9923  | -2.2  | 6.1  | 32616.5  | 5.18  | HUMAN | A6N176 | Actin, alpha skeletal muscle                                                     |
| 27375 | dirMS_041712_NAR_30mM_plus.2.19678.19678.2  | 2 | 3.01 | 0 | 2.42E+05 | 578s   | (K)JAGLQI(K)K(L)G(Q)I(L)S(K)Y                    | s-N-acetylglucosamine (S)      | 156.55 | 516.7959 | 829.514  | 203.0703 | -8.7  | 8.8  | 66268.9  | 9.06  | HUMAN | Q96G92 | GPI transamidase component PIG-T                                                 |
| 27376 | dirMS_041712_NAR_30mM_plus.2.21291.21291.2  | 2 | 3.01 | 0 | 7.29E+03 |        | (K)GQVWR(K)G(Q)V(W)N(G)N(L)G(R)Y                 |                                | 166.3  | 680.8538 | 1360.712 | -0.0117  | -8.6  | 9.75 | 60881    | 6.36  | HUMAN | E7EQ29 | Beta-galactosidase                                                               |
| 27377 | dirMS_041712_NAR_40mM_plus.2.19687.19687.3  | 3 | 3.01 | 0 | 1.06E+06 |        | (R)GLAPVQ(R)G(L)A(P)V(Q)A(Y)H(I)P(D)I(K)V        |                                | 183.65 | 583.3378 | 1748.011 | -0.0117  | -6.7  | 6.74 | 58266.4  | 9.46  | HUMAN | B4DND0 | Pyruvate carboxylase, mitochondrial                                              |
| 27378 | dirMS_041712_NAR_40mM_plus.2.6103.6103.2    | 2 | 3.01 | 0 | 5.46E+04 | 5132s  | (R)LSPTAR(R)I(S)P(T)A(S)R(S)                     | s-Phosphorylated S             | 94.97  | 406.1921 | 731.405  | 79.9723  | 7.4   | 9.75 | 34653.1  | 11.06 | HUMAN | Q99988 | Growth/differentiation factor 15                                                 |
| 27379 | dirMS_041712_NAR_50mM_plus.2.11550.11550.3  | 3 | 3.01 | 0 | 2.85E+05 |        | (R)FCGLQ(R)F(C)G(L)P(Q)P(T)V(G)L(G)T(V)L(R)N     | C-Carbamoylmethylation         | 128.32 | 658.0091 | 1972.032 | -0.0193  | -8.8  | 6    | 84837    | 9.79  | HUMAN | R1S154 | Nucleoperoxidase                                                                 |
| 27380 | dirMS_041712_NAR_50mM_plus.2.13089.13089.3  | 3 | 3.01 | 1 | 2.93E+05 | 51001s | (K)HRRVYS(K)I(R)R(Y)V(S)A(S)E(T)E(K)E            | s-N-acetylglucosamine (S)      | 136.75 | 580.9801 | 1537.833 | 203.0925 | 7.5   | 8.59 | 118870   | 4.85  | HUMAN | EP9CH6 | Ankyrin-2                                                                        |
| 27381 | dirMS_041712_NAR_50mM_plus.2.7390.7390.3    | 3 | 3.01 | 1 | 4.24E+04 |        | (K)IDFGNA(K)D(F)G(N)A(L)M(Q)A(K)I                |                                | 105.02 | 488.2509 | 1462.744 | -0.0056  | -3.8  | 8.59 | 149599.2 | 6.73  | HUMAN | C9JXF1 | Sterile alpha motif domain-containing protein 9 (Fragment)                       |
| 27382 | dirMS_041712_NAR_60mM_plus.10530.10530.3    | 3 | 3.01 | 0 | 9.43E+04 |        | (R)SSGPP(R)S(S)G(P)V(G)G(G)Q(Y)F(A)K(P)R(N)      |                                | 112.77 | 543.6023 | 1628.782 | 0.0108   | 6.6   | 9.7  | 33268.7  | 9.31  | HUMAN | FBWQ1  | Heterogeneous nuclear ribonucleoprotein A1                                       |
| 27383 | dirMS_041712_NAR_60mM_plus.16706.16706.3    | 3 | 3.01 | 1 | 3.09E+05 |        | (I)MKNSF(I)M(K)I(N)S(F)A(F)G(C)Q(K)I             | C-Carbamoylmethylation         | 142.9  | 532.2733 | 1594.808 | -0.0026  | -1.7  | 10   | 10471.9  | 5.4   | HUMAN | A2A3R7 | 40S ribosomal protein S6                                                         |
| 27384 | dirMS_041712_NAR_60mM_plus.17226.17226.3    | 3 | 3.01 | 0 | 5.80E+05 | K731k  | (K)VAETVY(K)V(A)E(T)Y(T)I(L)K(K)                 | k-Ubiquitin-K                  | 147.62 | 415.2483 | 1129.694 | 114.0364 | -5.2  | 8.72 | 263152.8 | 8.75  | HUMAN | ANED01 | Protein FAM186A                                                                  |
| 27385 | dirMS_041712_NAR_60mM_plus.17471.17471.3    | 3 | 3.01 | 1 | 5.45E+05 |        | (R)JKLQEA(R)K(L)D(L)A(L)N(S)K(E)                 |                                | 147.8  | 415.2483 | 1243.726 | 0.0047   | 3.8   | 6.07 | 63136.9  | 5.83  | HUMAN | D6RAQ3 | Prelamin-A/C                                                                     |
| 27386 | dirMS_041712_NAR_60mM_plus.17746.17746.3    | 3 | 3.01 | 0 | 9.06E+04 |        | (K)TFKPID(K)T(F)K(P)D(L)S(D)I(K)R                |                                | 149.98 | 426.2424 | 1276.715 | -0.0021  | -1.6  | 5.63 | 10920    | 9.39  | HUMAN | C9JLW8 | Protein FAM195B                                                                  |
| 27387 | dirMS_041712_NAR_60mM_plus.19017.19017.3    | 3 | 3.01 | 1 | 1.44E+04 | K817k  | (R)RSPQR(R)R(P)D(C)F(S)A(L)D(R)R                 | k-Ubiquitin-K                  | 157.23 | 530.622  | 1445.786 | 114.0655 | 14.5  | 8.75 | 137811.6 | 6.21  | HUMAN | K7Z7Y1 | Rip guanine nucleotide exchange factor 6                                         |
| 27388 | dirMS_041712_NAR_60mM_plus.2468.2468.3      | 3 | 3.01 | 1 | 7.00E+05 | M176m  | (R)GmVQK(K)G(m)V(Q)A(R)I(A)E(G)K(A)              | m-Diiodo methionine            | 97.73  | 463.2618 | 1371.778 | 15.9932  | -11.3 | 8.75 | 95683.2  | 5.63  | HUMAN | Q75891 | Cytosolic 10-formyltetrahydrofolate dehydrogenase                                |
| 27389 | dirMS_041712_NAR_60mM_plus.2780.2780.3      | 3 | 3.01 | 1 | 2.95E+05 | T136t  | (K)KSKVCK(K)S(K)V(E)C(F)A(E)G                    | C-Carbamoylmethylation L1H-ace | 99.02  | 519.2682 | 1352.724 | 203.0658 | -8.7  | 8.59 | 35163.4  | 5.67  | HUMAN | B4EF4  | ER degradation-enhancing alpha-mannosidase-like 2                                |
| 27390 | dirMS_041712_NAR_60mM_plus.8866.8866.3      | 3 | 3.01 | 0 | 2.16E+05 |        | (R)SVITFG(R)S(V)T(F)G(S)V(S)P(R)I                |                                | 103.85 | 405.2162 | 1213.621 | 0.0129   | 10.6  | 8.46 | 65982.3  | 8.42  | HUMAN | Q9NSB2 | Keratin, type II cuticular Hb4                                                   |
| 27391 | dirMS_041712_NAR_60mM_minus.9558.9558.3     | 3 | 3    | 0 | 2.04E+05 | N516n  | (R)JSGALP(R)I(S)G(V)A(L)T(D)K(F)                 | n-N-acetylglucosamine (N)      | 112.4  | 423.5497 | 1065.557 | 203.077  | -1.8  | 5.84 | 220801   | 6.98  | HUMAN | A6NHR9 | Structural maintenance of chromosomes flexible hinge domain-containing protein 1 |
